# Supplementary material for: A Multi-Platform Draft de novo Genome Assembly and Comparative Analysis for the Scarlet Macaw (Ara macao)
Source: PubMed Central journal article supplement (PMC3648530; doi:10.1371/journal.pone.0062415), 2013-05-08
Supplement: pone.0062415.s018.pdf [file pone.0062415.s018.pdf]

Please go to the following site for supplementary information:

<http://vetmed.tamu.edu/schubot/research/scarlet-macaw-genome-project>
