# Supplementary material for: A Multi-Platform Draft de novo Genome Assembly and Comparative Analysis for the Scarlet Macaw (Ara macao)
Source: PLoS One. 2013 May 8;8(5):e62415. doi: 10.1371/journal.pone.0062415 (PMC3648530; doi:10.1371/journal.pone.0062415)
Supplement: Table S1 — Scarlet macaw simple de novo assembly statistics. (XLSX) [file pone.0062415.s002.xlsx]

## Sheet: TableS1_SMACv1.0AssStats
Contig	Reference length	Mapped reads	Forward reads	Reversed reads	Intact pairs	Mean distance	Standard deviation	Reads from broken pairs: wrong distance	Reads from broken pairs: mate inverted	Reads from broken pairs: mate on other contig	Reads from broken pairs: mate not mapped	Non-perfect matches	Maximum coverage	Average coverage	Standard deviation	% GC		Created v4.8
s_1_1_SMACv1.0_contig 1	827	101	51	50	20	332	26.395	11	11	24	13	40	20	10.86	4.712	34.583
s_1_1_SMACv1.0_contig 2	1647	360	171	189	55	330.036	22.104	28	28	107	84	94	35	16.653	5.763	38.434
s_1_1_SMACv1.0_contig 3	839	53	24	29	9	326.778	12.081	8	8	11	8	12	13	5.665	2.612	35.161
s_1_1_SMACv1.0_contig 4	674	99	45	54	15	322.8	28.569	8	8	41	11	31	22	12.414	4.989	36.35
s_1_1_SMACv1.0_contig 5	589	45	24	21	6	343.333	22.47	5	5	12	9	12	14	6.542	3.558	34.975
s_1_1_SMACv1.0_contig 6	1164	140	74	66	30	334.067	24.327	19	19	25	16	45	23	10.418	5.069	41.237
s_1_1_SMACv1.0_contig 7	650	77	36	41	8	330	19.856	6	6	34	13	17	20	9.135	4.949	34.308
s_1_1_SMACv1.0_contig 8	542	26	12	14	5	327	32.625	1	1	10	4	6	11	4.1	2.206	37.823
s_1_1_SMACv1.0_contig 9	533	73	40	33	8	324.25	30.107	9	9	15	22	19	19	10.426	4.84	35.647
s_1_1_SMACv1.0_contig 10	1388	226	106	120	52	337.981	23.64	25	25	31	36	81	27	14.617	4.519	35.591
s_1_1_SMACv1.0_contig 11	771	70	41	29	13	325.615	25.88	7	7	6	24	21	16	7.525	3.235	36.576
s_1_1_SMACv1.0_contig 12	821	190	104	86	26	345.346	28.205	13	13	53	58	46	38	17.354	8.858	40.073
s_1_1_SMACv1.0_contig 13	591	60	26	34	13	334	31.513	4	4	15	11	25	16	9.069	3.338	41.286
s_1_1_SMACv1.0_contig 14	1013	135	72	63	26	324.808	35.356	8	8	48	18	45	23	10.706	4.753	40.079
s_1_1_SMACv1.0_contig 15	606	99	45	54	7	322	8.194	7	7	40	30	17	24	13.437	5.089	35.479
s_1_1_SMACv1.0_contig 16	1321	213	113	100	29	334.897	26.684	21	21	73	34	62	27	13.627	4.948	36.715
s_1_1_SMACv1.0_contig 17	1347	169	92	77	36	333.417	28.391	17	17	31	28	62	20	11.088	3.701	42.39
s_1_1_SMACv1.0_contig 18	947	85	47	38	17	340.529	29.298	6	6	21	14	36	14	8.571	2.568	40.866
s_1_1_SMACv1.0_contig 19	1036	115	74	41	20	330.05	31.952	9	9	24	30	42	17	9.641	3.287	43.436
s_1_1_SMACv1.0_contig 20	525	53	21	32	5	326.4	21.85	6	6	18	13	12	13	7.004	3.277	36
s_1_1_SMACv1.0_contig 21	979	123	63	60	24	337.208	27.16	12	12	26	24	41	16	10.644	3.4	43.309
s_1_1_SMACv1.0_contig 22	1044	234	128	106	41	340.098	25.285	18	18	48	67	74	31	18.096	5.768	37.452
s_1_1_SMACv1.0_contig 23	1551	181	89	92	39	340.103	27.099	14	14	31	38	68	20	10.19	4.034	40.426
s_1_1_SMACv1.0_contig 24	618	71	40	31	8	334.5	24.104	7	7	24	16	15	21	9.209	4.4	34.466
s_1_1_SMACv1.0_contig 25	525	85	43	42	4	361.75	26.328	1	1	49	25	20	19	12.143	3.778	40.571
s_1_1_SMACv1.0_contig 26	838	150	66	84	24	337.167	23.797	12	12	43	33	62	29	15.289	5.434	40.573
s_1_1_SMACv1.0_contig 27	670	85	48	37	15	328.933	23.136	6	6	13	30	22	21	10.624	4.732	36.269
s_1_1_SMACv1.0_contig 28	1001	122	55	67	23	330.043	24.613	9	9	26	31	40	24	9.698	4.287	49.75
s_1_1_SMACv1.0_contig 29	645	118	60	58	18	339.833	19.718	9	9	44	20	36	27	13.617	6.353	38.14
s_1_1_SMACv1.0_contig 30	729	183	92	91	39	336.538	28.87	10	10	54	28	69	36	20.975	8.176	41.838
s_1_1_SMACv1.0_contig 31	1273	153	75	78	28	328.071	31.77	14	14	41	25	42	20	9.958	3.353	42.734
s_1_1_SMACv1.0_contig 32	809	98	52	46	15	337.2	32.322	9	9	27	22	28	21	9.911	4.392	42.274
s_1_1_SMACv1.0_contig 33	866	66	33	33	12	320.167	35.449	9	9	16	7	22	15	7.012	2.971	33.603
s_1_1_SMACv1.0_contig 34	1458	214	116	98	39	336.872	26.673	14	14	70	37	71	26	10.933	4.805	42.73
s_1_1_SMACv1.0_contig 35	806	83	44	39	11	324.364	21.287	6	6	26	22	26	16	8.294	3.393	36.725
s_1_1_SMACv1.0_contig 36	683	60	28	32	10	328.3	19.581	3	3	17	17	20	19	6.48	4.073	36.457
s_1_1_SMACv1.0_contig 37	818	105	61	44	18	328.944	26.404	4	4	19	41	34	20	9.627	4.348	39.12
s_1_1_SMACv1.0_contig 38	579	46	22	24	5	350.8	35.051	3	3	19	11	10	12	6.872	2.249	35.751
s_1_1_SMACv1.0_contig 39	716	83	41	42	8	330.625	30.397	2	2	30	32	14	17	8.137	3.379	37.57
s_1_1_SMACv1.0_contig 40	638	62	32	30	11	316.818	28.762	5	5	16	14	15	16	7.561	3.185	36.834
s_1_1_SMACv1.0_contig 41	786	61	30	31	11	339.455	24.839	5	5	14	15	17	13	6.427	3.092	37.913
s_1_1_SMACv1.0_contig 42	1245	155	69	86	25	334.72	32.265	19	19	30	35	46	25	10.542	4.645	36.627
s_1_1_SMACv1.0_contig 43	1004	107	56	51	21	319.381	30.567	11	11	16	24	40	18	9.513	3.583	36.554
s_1_1_SMACv1.0_contig 44	948	147	59	88	22	337.591	30.57	11	13	55	21	41	22	13.091	4.921	34.283
s_1_1_SMACv1.0_contig 45	533	67	40	27	11	321.364	24.358	6	6	17	16	25	23	10.062	5.2	35.084
s_1_1_SMACv1.0_contig 46	681	70	34	36	12	333.417	29.441	4	4	27	10	28	16	9.141	3.619	39.794
s_1_1_SMACv1.0_contig 47	535	52	25	27	11	337.182	15.948	2	2	13	13	22	15	8.15	3.707	37.57
s_1_1_SMACv1.0_contig 48	742	57	27	30	8	329.375	38.597	7	7	16	9	15	12	7.396	2.625	40.97
s_1_1_SMACv1.0_contig 49	1026	117	71	46	9	336.556	29.052	11	11	51	21	32	23	9.307	4.201	34.99
s_1_1_SMACv1.0_contig 50	633	70	35	35	8	315.875	23.057	8	8	17	21	22	17	9.352	3.975	36.809
s_1_1_SMACv1.0_contig 51	724	56	23	33	6	320.333	18.679	5	5	13	20	16	14	6.297	2.808	37.707
s_1_1_SMACv1.0_contig 52	513	39	16	23	2	344	33	8	8	14	4	11	14	6.674	2.787	31.189
s_1_1_SMACv1.0_contig 53	510	53	27	26	9	323	31.468	5	5	9	16	16	19	8.42	4.409	37.647
s_1_1_SMACv1.0_contig 54	619	44	28	16	10	327.7	21.973	1	1	9	13	16	14	5.869	2.691	38.934
s_1_1_SMACv1.0_contig 55	609	49	21	28	6	324.667	25.532	4	4	17	11	13	12	6.67	2.668	37.438
s_1_1_SMACv1.0_contig 56	524	35	20	15	5	339.4	37.232	5	5	4	8	12	11	6.594	2.634	34.351
s_1_1_SMACv1.0_contig 57	532	52	26	26	6	331.833	45.714	6	6	9	19	9	13	7.848	3.25	37.97
s_1_1_SMACv1.0_contig 58	753	58	23	35	10	338.2	18.568	8	8	8	11	22	14	7.126	2.38	34.396
s_1_1_SMACv1.0_contig 59	611	98	48	50	2	314	27	12	12	30	36	26	29	13.067	5.392	36.825
s_1_1_SMACv1.0_contig 60	1104	129	64	65	27	338.741	22.102	9	9	25	30	48	21	9.838	4.239	42.12
s_1_1_SMACv1.0_contig 61	504	38	17	21	4	316.75	40.629	4	4	6	16	7	13	6.484	3.463	34.722
s_1_1_SMACv1.0_contig 62	806	177	92	85	22	330.5	35.063	12	12	76	28	53	33	17.21	6.84	42.556
s_1_1_SMACv1.0_contig 63	491	63	27	36	22	319.409	18.93	2	2	10	4	29	17	10.503	4.043	63.951
s_1_1_SMACv1.0_contig 64	891	129	72	57	24	332.542	25.143	8	8	47	18	37	25	11.847	5.471	38.047
s_1_1_SMACv1.0_contig 65	821	142	60	82	23	336.304	27.591	15	15	41	23	50	29	14.75	6.217	36.297
s_1_1_SMACv1.0_contig 66	1559	167	88	79	34	333.794	25.34	11	11	43	31	55	22	8.97	4.314	38.422
s_1_1_SMACv1.0_contig 67	1081	103	57	46	16	331.062	23.92	10	10	25	25	31	14	7.608	2.913	32.562
s_1_1_SMACv1.0_contig 68	988	127	61	66	16	332.062	30.835	13	13	26	39	38	22	10.747	3.677	37.854
s_1_1_SMACv1.0_contig 69	1363	206	98	108	50	335	30.96	15	15	40	34	68	29	13.016	6.839	34.263
s_1_1_SMACv1.0_contig 70	1008	117	59	58	21	335.857	26.75	13	13	23	24	42	25	9.903	4.065	35.119
s_1_1_SMACv1.0_contig 71	730	148	82	66	32	333.219	22.181	3	3	36	40	50	34	16.593	7.505	39.315
s_1_1_SMACv1.0_contig 72	1408	283	144	139	58	331.379	29.816	19	19	76	48	98	40	17.751	9.009	40.483
s_1_1_SMACv1.0_contig 73	687	51	23	28	8	323.875	21.239	5	5	17	8	18	14	6.25	2.366	36.245
s_1_1_SMACv1.0_contig 74	1026	215	107	108	28	331.429	29.045	26	26	54	49	63	32	17.376	5.451	37.232
s_1_1_SMACv1.0_contig 75	840	89	44	45	12	327.667	22.936	6	6	34	17	23	16	7.958	3.196	36.071
s_1_1_SMACv1.0_contig 76	1016	186	96	90	54	337.315	32.464	21	21	22	10	85	29	17.469	7.286	40.157
s_1_1_SMACv1.0_contig 77	519	53	27	26	5	333	23.435	4	4	13	20	13	13	7.9	2.942	40.655
s_1_1_SMACv1.0_contig 78	1389	129	67	62	27	333.037	27.133	10	10	27	26	41	17	8.143	3.499	38.157
s_1_1_SMACv1.0_contig 79	1275	154	79	75	36	333.889	31.669	14	14	28	23	59	22	10.986	4.634	42.039
s_1_1_SMACv1.0_contig 80	582	41	27	14	2	334.5	26.5	4	4	18	8	11	13	6.28	2.785	29.21
s_1_1_SMACv1.0_contig 81	767	118	61	57	14	326.786	25.1	10	10	36	34	32	26	11.847	5.379	39.113
s_1_1_SMACv1.0_contig 82	1142	117	53	64	19	334.421	23.955	7	7	40	21	37	20	8.222	3.523	35.377
s_1_1_SMACv1.0_contig 83	577	51	33	18	10	313.8	33.834	4	4	15	8	15	16	7.496	3.691	34.315
s_1_1_SMACv1.0_contig 84	2995	327	157	170	71	504.394	523.483	32	32	54	61	108	22	9.761	3.688	40.801
s_1_1_SMACv1.0_contig 85	548	59	27	32	6	335.5	30.374	5	5	14	20	16	22	9.159	4.576	28.467
s_1_1_SMACv1.0_contig 86	758	146	82	64	22	335.591	19.819	10	10	53	28	40	34	15.437	7.066	36.148
s_1_1_SMACv1.0_contig 87	1300	99	62	37	20	321.9	31.947	7	7	18	23	33	18	7.371	3.294	33.615
s_1_1_SMACv1.0_contig 88	2244	421	203	218	97	425.588	343.727	12	12	125	70	175	29	14.865	5.241	48.396
s_1_1_SMACv1.0_contig 89	614	49	29	20	5	320.6	17.454	3	3	15	17	15	15	6.145	3.264	38.599
s_1_1_SMACv1.0_contig 90	702	141	77	64	20	325.6	24.414	7	7	39	47	43	30	16.155	6.247	43.875
s_1_1_SMACv1.0_contig 91	518	62	31	31	7	326.143	37.112	3	3	24	17	15	16	8.629	3.513	36.1
s_1_1_SMACv1.0_contig 92	500	37	20	17	6	339.167	13.813	4	4	9	7	11	12	6.66	3.109	37.6
s_1_1_SMACv1.0_contig 93	579	27	14	13	1	307	0	2	2	9	10	10	10	4.014	2.197	29.534
s_1_1_SMACv1.0_contig 94	1835	275	134	141	60	331.383	27.565	17	17	73	44	92	25	12.7	4.924	43.27
s_1_1_SMACv1.0_contig 95	1048	179	107	72	27	334.222	26.723	19	19	50	31	57	31	15.475	5.301	37.786
s_1_1_SMACv1.0_contig 96	498	30	16	14	1	331	0	2	2	17	6	7	12	4.735	2.583	36.747
s_1_1_SMACv1.0_contig 97	534	53	23	30	7	311.714	13.381	6	6	12	14	15	13	8.429	2.394	32.21
s_1_1_SMACv1.0_contig 98	948	94	55	39	12	331.583	25.227	10	10	29	16	24	20	8.714	3.992	32.489
s_1_1_SMACv1.0_contig 99	911	58	27	31	16	338.5	24.68	5	5	8	5	26	15	6.302	3.278	35.456
s_1_1_SMACv1.0_contig 100	623	42	18	24	5	328.2	9.579	3	3	12	12	10	18	5.862	4.469	31.461
s_1_1_SMACv1.0_contig 101	1473	171	79	92	37	337.081	25.676	18	18	43	16	56	26	10.026	4.694	33.13
s_1_1_SMACv1.0_contig 102	1157	118	58	60	15	339.933	13.429	8	8	51	11	36	19	9.326	3.822	31.979
s_1_1_SMACv1.0_contig 103	810	59	33	26	8	308.375	37.209	8	8	11	13	18	18	6.97	4.014	32.963
s_1_1_SMACv1.0_contig 104	861	176	95	81	27	336.852	25.23	12	12	54	40	44	29	16.777	6.882	39.605
s_1_1_SMACv1.0_contig 105	685	69	32	37	15	347.267	26.854	6	6	8	19	23	20	8.533	4.391	41.314
s_1_1_SMACv1.0_contig 106	555	36	24	12	4	336	27.523	3	3	11	8	14	9	5.559	2.136	37.838
s_1_1_SMACv1.0_contig 107	651	105	50	55	11	326.727	21.805	10	10	39	23	29	22	12.171	5.325	34.869
s_1_1_SMACv1.0_contig 108	521	74	29	45	13	343.077	29.692	6	6	21	15	30	26	12.042	5.302	46.065
s_1_1_SMACv1.0_contig 109	848	56	27	29	11	315.273	26.995	8	8	5	13	18	12	6.169	2.552	33.726
s_1_1_SMACv1.0_contig 110	604	79	36	43	4	332.5	57.295	11	11	14	34	17	19	9.925	4.616	37.252
s_1_1_SMACv1.0_contig 111	995	163	75	88	26	327.308	21.736	19	19	32	35	50	26	14.233	5.452	34.07
s_1_1_SMACv1.0_contig 112	706	56	26	30	8	331.25	26.466	4	4	18	13	19	14	6.67	3.142	35.977
s_1_1_SMACv1.0_contig 113	881	79	37	42	15	348.867	24.21	8	8	17	13	25	18	8.195	3.77	35.982
s_1_1_SMACv1.0_contig 114	569	56	22	34	7	314	41.833	9	9	12	12	18	14	8.042	2.601	36.907
s_1_1_SMACv1.0_contig 115	787	77	40	37	16	334.25	25.873	9	9	14	12	20	22	8.845	4.743	37.865
s_1_1_SMACv1.0_contig 116	892	124	77	47	14	334.786	21.371	10	10	46	30	33	27	10.224	4.798	43.946
s_1_1_SMACv1.0_contig 117	669	87	39	48	6	336.833	13.631	6	6	32	30	26	19	9.558	4.22	32.885
s_1_1_SMACv1.0_contig 118	1204	148	73	75	31	334.452	23.497	15	15	21	31	52	26	11.112	6.084	36.13
s_1_1_SMACv1.0_contig 119	765	86	41	45	7	340.143	10.035	6	6	43	11	23	18	9.176	3.826	32.026
s_1_1_SMACv1.0_contig 120	885	140	79	61	20	321.5	31.275	8	8	57	25	46	38	11.58	9.48	62.486
s_1_1_SMACv1.0_contig 121	536	27	13	14	4	333.75	20.535	4	4	6	4	8	11	4.784	2.58	34.888
s_1_1_SMACv1.0_contig 122	757	122	71	51	15	338.4	37.615	12	12	33	32	31	29	13.127	6.654	35.535
s_1_1_SMACv1.0_contig 123	943	67	36	31	16	328.5	33.893	10	10	9	5	25	14	7.002	3.062	33.298
s_1_1_SMACv1.0_contig 124	550	53	27	26	8	318.375	35.693	7	7	10	10	18	17	8.982	4.285	36.364
s_1_1_SMACv1.0_contig 125	663	106	63	43	20	328	24.785	7	7	21	27	33	24	13.462	5.558	42.986
s_1_1_SMACv1.0_contig 126	890	119	61	58	14	325.643	21.714	16	16	35	19	35	24	11.582	5.144	34.944
s_1_1_SMACv1.0_contig 127	1485	303	145	158	53	328.226	27.433	26	26	78	55	91	38	17.631	7.283	36.768
s_1_1_SMACv1.0_contig 128	1000	123	56	67	20	327.2	25.412	5	5	45	26	35	19	9.808	3.838	40.2
s_1_1_SMACv1.0_contig 129	865	173	90	83	30	338.667	24.093	18	18	49	24	70	40	17.194	7.191	37.919
s_1_1_SMACv1.0_contig 130	555	70	43	27	9	326.111	13.715	7	7	30	6	17	22	11.782	4.603	37.838
s_1_1_SMACv1.0_contig 131	1479	180	87	93	34	333.676	33.995	20	20	47	25	60	26	10.192	4.348	41.65
s_1_1_SMACv1.0_contig 132	674	47	25	22	3	346.333	15.085	9	9	15	7	13	11	6.172	2.199	35.46
s_1_1_SMACv1.0_contig 133	545	83	31	52	7	328.857	24.074	9	9	13	37	22	20	12.402	4.384	34.128
s_1_1_SMACv1.0_contig 134	849	145	70	75	18	328.389	28.022	23	23	36	27	37	32	13.176	6.785	35.336
s_1_1_SMACv1.0_contig 135	1088	154	84	70	27	322.185	27.475	20	20	39	17	49	23	12.283	3.918	34.467
s_1_1_SMACv1.0_contig 136	652	61	29	32	2	315	13	8	8	33	7	12	16	7.221	3.554	32.055
s_1_1_SMACv1.0_contig 137	563	123	61	62	12	340.417	23.946	5	5	30	56	37	34	16.046	6.378	43.339
s_1_1_SMACv1.0_contig 138	850	114	52	62	19	325.526	22.432	3	3	48	19	35	22	9.907	4.699	37.882
s_1_1_SMACv1.0_contig 139	592	45	20	25	8	342.75	23.193	2	2	20	5	16	17	6.694	3.463	36.824
s_1_1_SMACv1.0_contig 140	634	96	45	51	17	323.882	20.329	11	11	14	25	26	33	13.251	7.115	33.281
s_1_1_SMACv1.0_contig 141	700	127	73	54	21	334.286	32.514	17	17	34	16	37	33	15.749	7.22	34.143
s_1_1_SMACv1.0_contig 142	772	64	34	30	12	325.417	21.305	5	5	18	11	25	13	7.165	2.719	37.176
s_1_1_SMACv1.0_contig 143	529	46	22	24	8	344.125	12.927	2	2	10	16	14	15	7.115	2.814	40.265
s_1_1_SMACv1.0_contig 144	504	106	47	59	16	342.125	25.517	2	2	44	26	30	26	14.28	5.368	60.119
s_1_1_SMACv1.0_contig 145	804	80	35	45	16	339.062	17.577	7	7	14	20	30	18	8.448	3.841	38.184
s_1_1_SMACv1.0_contig 146	553	81	37	44	8	312.75	28.678	7	7	31	20	17	21	11.828	5.394	36.347
s_1_1_SMACv1.0_contig 147	534	67	36	31	7	318.857	15.697	5	5	30	13	19	18	10.185	3.562	40.449
s_1_1_SMACv1.0_contig 148	658	84	48	36	16	336.625	24.748	10	10	23	7	31	23	11.448	4.475	36.626
s_1_1_SMACv1.0_contig 149	532	33	17	16	7	338.286	24.656	3	3	2	11	11	11	5.852	2.916	33.459
s_1_1_SMACv1.0_contig 150	695	65	28	37	13	338	26.623	5	5	15	14	21	13	7.845	2.856	34.101
s_1_1_SMACv1.0_contig 151	666	68	36	32	8	335	16.47	7	7	23	14	18	19	8.592	4.716	31.682
s_1_1_SMACv1.0_contig 152	954	179	87	92	42	335.071	27.807	16	16	40	22	61	29	17.477	6.171	35.535
s_1_1_SMACv1.0_contig 153	930	147	73	74	17	342.706	28.004	14	14	36	46	39	31	12.271	5.552	32.688
s_1_1_SMACv1.0_contig 154	871	124	52	72	14	336.214	27.037	9	9	49	27	34	18	10.839	4.015	40.184
s_1_1_SMACv1.0_contig 155	1116	108	56	52	19	337.579	31.242	6	6	29	25	46	20	7.878	3.765	41.308
s_1_1_SMACv1.0_contig 156	1504	141	76	65	20	333.1	30.565	14	14	41	19	47	22	9.358	4.29	29.654
s_1_1_SMACv1.0_contig 157	760	81	41	40	9	328	16.452	8	8	28	14	22	19	9.07	3.691	38.553
s_1_1_SMACv1.0_contig 158	629	51	28	23	6	335.5	21.808	4	4	15	14	16	17	7.447	4.007	31.161
s_1_1_SMACv1.0_contig 159	544	139	55	84	18	323.667	28.284	10	10	48	33	36	40	21.382	9.574	40.074
s_1_1_SMACv1.0_contig 160	637	93	49	44	18	333.611	32.704	8	8	28	13	32	22	12.686	5.277	38.462
s_1_1_SMACv1.0_contig 161	504	64	33	31	10	340.2	20.889	5	5	19	15	22	21	10.304	4.659	37.698
s_1_1_SMACv1.0_contig 162	506	45	21	24	3	284	31.791	8	8	13	10	9	14	7.334	3.343	36.166
s_1_1_SMACv1.0_contig 163	602	70	36	34	6	348.167	24.382	4	4	35	15	13	18	8.588	3.76	33.056
s_1_1_SMACv1.0_contig 164	901	79	41	38	16	330.938	26.328	5	5	17	19	30	15	7.545	2.854	40.289
s_1_1_SMACv1.0_contig 165	1166	148	87	61	30	327.3	28.565	8	8	13	56	48	20	10.232	3.106	37.736
s_1_1_SMACv1.0_contig 166	740	102	57	45	15	338.933	25.697	11	11	24	24	38	28	11.651	6.522	40
s_1_1_SMACv1.0_contig 167	887	79	35	44	14	333.143	30.242	9	9	19	14	26	14	7.696	2.875	38.106
s_1_1_SMACv1.0_contig 168	841	141	73	68	18	333.278	24.202	8	8	51	33	45	27	13.786	5.673	36.98
s_1_1_SMACv1.0_contig 169	917	135	71	64	30	329.067	35.15	13	13	26	21	49	21	12.431	4.254	43.184
s_1_1_SMACv1.0_contig 170	627	126	78	48	9	326.889	15.502	2	2	28	76	30	31	14.293	6.778	38.756
s_1_1_SMACv1.0_contig 171	949	119	59	60	14	327.571	25.928	10	10	36	33	32	22	9.604	4.389	40.885
s_1_1_SMACv1.0_contig 172	600	55	26	29	8	330.375	31.464	7	7	13	12	17	15	7.603	3.306	44.667
s_1_1_SMACv1.0_contig 173	991	134	73	61	18	340.5	25.726	10	10	48	26	44	16	10.015	3.179	54.591
s_1_1_SMACv1.0_contig 174	522	52	29	23	12	341.75	28.057	1	1	22	3	19	16	9.011	3.806	40.23
s_1_1_SMACv1.0_contig 175	704	62	26	36	11	330	28.413	8	8	15	8	20	17	8.42	3.604	36.08
s_1_1_SMACv1.0_contig 176	965	111	54	57	15	337.867	21.379	12	12	31	23	33	17	9.766	3.675	34.508
s_1_1_SMACv1.0_contig 177	1206	171	85	86	40	337.5	23.474	15	15	37	23	66	21	11.656	3.753	46.02
s_1_1_SMACv1.0_contig 178	1957	437	216	221	87	350.713	144.712	31	31	129	68	125	40	17.845	7.693	39.755
s_1_1_SMACv1.0_contig 179	876	95	54	41	18	319.944	35.964	4	4	26	22	33	19	8.89	4.056	41.553
s_1_1_SMACv1.0_contig 180	1548	197	104	93	39	330.231	25.161	16	16	58	26	64	21	10.496	4.523	38.114
s_1_1_SMACv1.0_contig 181	873	123	60	63	23	341.609	22.1	10	10	20	31	33	22	12.748	4.549	31.386
s_1_1_SMACv1.0_contig 182	622	112	59	53	15	330.867	34.045	15	15	18	30	35	34	15.365	7.058	42.283
s_1_1_SMACv1.0_contig 183	1007	108	53	55	16	337.75	22.659	14	14	24	23	31	19	8.783	3.635	34.657
s_1_1_SMACv1.0_contig 184	548	88	43	45	9	338.222	26.072	9	9	31	17	20	27	12.544	6.2	36.131
s_1_1_SMACv1.0_contig 185	793	68	32	36	10	345.1	28.822	3	3	20	21	20	13	6.649	2.387	34.552
s_1_1_SMACv1.0_contig 186	721	63	32	31	6	338	29.67	4	4	13	29	13	15	6.877	2.576	33.981
s_1_1_SMACv1.0_contig 187	732	140	80	60	27	326.074	27.374	18	18	21	28	42	30	16.541	7.33	37.568
s_1_1_SMACv1.0_contig 188	710	82	41	41	10	315.9	20.52	10	10	15	25	27	21	10.639	4.367	40.423
s_1_1_SMACv1.0_contig 189	1477	159	84	75	28	337.25	29.877	14	14	31	36	55	21	9.293	3.865	36.764
s_1_1_SMACv1.0_contig 190	605	70	14	56	1	331	0	4	4	16	40	27	27	9.068	6.691	73.719
s_1_1_SMACv1.0_contig 191	564	173	84	89	14	316.214	34.372	11	11	52	69	63	34	17.261	7.062	60.106
s_1_1_SMACv1.0_contig 192	564	26	16	10	0			1	1	6	16	3	15	3.562	4.072	38.652
s_1_1_SMACv1.0_contig 193	694	50	21	29	6	329.667	11.025	7	7	14	7	14	12	6.399	2.638	34.87
s_1_1_SMACv1.0_contig 194	811	120	65	55	17	329.824	24.872	16	16	28	24	41	28	12.71	5.388	35.635
s_1_1_SMACv1.0_contig 195	1343	233	118	115	42	324.667	25.548	28	28	61	29	71	31	15.219	6.306	37.379
s_1_1_SMACv1.0_contig 196	735	46	22	24	10	348.1	16.053	3	3	12	6	14	10	5.807	2.407	34.422
s_1_1_SMACv1.0_contig 197	1239	199	98	101	37	334.135	26.836	19	19	54	27	55	31	14.226	7.237	36.804
s_1_1_SMACv1.0_contig 198	986	91	43	48	16	319.312	25.641	12	12	13	20	28	16	8.281	3.255	35.396
s_1_1_SMACv1.0_contig 199	987	120	62	58	27	337.63	26.775	3	3	29	30	43	18	9.415	3.486	43.161
s_1_1_SMACv1.0_contig 200	1415	215	106	109	46	328.13	32.561	22	22	39	33	73	36	13.619	6.801	34.7
s_1_1_SMACv1.0_contig 201	678	66	40	26	5	318.6	13.749	9	9	21	17	13	16	8.261	3.687	32.891
s_1_1_SMACv1.0_contig 202	555	57	20	37	5	313.6	17.951	5	5	21	16	12	17	7.739	3.458	38.919
s_1_1_SMACv1.0_contig 203	680	101	52	49	9	332.111	43.616	4	4	41	34	26	17	10.531	2.635	37.206
s_1_1_SMACv1.0_contig 204	630	51	21	30	8	325.75	28.556	3	3	23	3	14	15	8.267	2.944	34.762
s_1_1_SMACv1.0_contig 205	1547	210	105	105	44	329.364	31.71	17	17	53	32	73	26	11.996	5.222	33.42
s_1_1_SMACv1.0_contig 206	1506	170	76	94	44	332.795	30.352	12	12	31	26	67	19	9.667	3.698	42.098
s_1_1_SMACv1.0_contig 207	713	136	69	67	23	342.261	28.395	11	11	37	30	42	30	15.624	6.401	37.588
s_1_1_SMACv1.0_contig 208	734	98	51	47	18	330.778	30.165	9	9	27	16	35	21	11.736	3.567	41.689
s_1_1_SMACv1.0_contig 209	660	157	94	63	13	326.077	18.087	11	11	67	41	46	27	16.023	5.865	50
s_1_1_SMACv1.0_contig 210	1351	154	72	82	20	323.75	26.21	12	12	43	40	51	18	9.849	3.417	37.454
s_1_1_SMACv1.0_contig 211	669	160	99	61	29	326.276	32.83	9	9	52	27	56	42	19.018	10.679	53.662
s_1_1_SMACv1.0_contig 212	617	57	33	24	7	320.714	31.001	3	3	19	18	22	14	6.895	2.766	33.549
s_1_1_SMACv1.0_contig 213	621	65	35	30	10	336.1	10.931	8	8	20	9	21	19	8.354	4.218	33.333
s_1_1_SMACv1.0_contig 214	1316	117	55	62	21	341.619	31.908	10	10	31	21	38	15	7.264	2.779	40.122
s_1_1_SMACv1.0_contig 215	532	70	46	24	6	342	19.218	7	7	20	21	9	23	10.538	4.424	37.218
s_1_1_SMACv1.0_contig 216	840	127	69	58	32	336.656	20.627	4	4	40	14	49	27	12.371	5.532	45
s_1_1_SMACv1.0_contig 217	757	81	40	41	15	340.867	25.377	3	3	25	20	21	20	8.711	3.936	38.97
s_1_1_SMACv1.0_contig 218	958	102	51	51	19	335.474	18.007	10	10	19	24	30	17	9.007	4.013	37.996
s_1_1_SMACv1.0_contig 219	731	59	30	29	15	334.133	24.055	4	4	12	7	22	19	7.669	4.277	33.789
s_1_1_SMACv1.0_contig 220	847	89	41	48	16	322	30.514	6	6	27	16	24	17	9.233	3.198	37.898
s_1_1_SMACv1.0_contig 221	661	72	40	32	4	318.75	39.708	6	6	24	24	18	19	9.386	4.425	38.729
s_1_1_SMACv1.0_contig 222	690	134	65	69	10	319.4	19.855	5	5	57	42	30	33	14.339	6.689	41.449
s_1_1_SMACv1.0_contig 223	844	93	43	50	21	330.19	32.284	8	8	14	16	40	22	11.12	5.686	39.218
s_1_1_SMACv1.0_contig 224	509	28	15	13	5	294.2	12.48	0	0	11	6	11	14	5.083	3.029	32.613
s_1_1_SMACv1.0_contig 225	724	97	49	48	8	331.125	30.346	8	8	39	24	18	19	10.275	4.227	34.669
s_1_1_SMACv1.0_contig 226	1239	209	99	110	41	335.171	29.441	13	13	54	41	71	28	14.482	6.989	37.45
s_1_1_SMACv1.0_contig 227	589	55	28	27	4	341.75	13.498	9	9	16	11	13	16	7.725	3.443	33.447
s_1_1_SMACv1.0_contig 228	818	78	41	37	13	333.769	24.182	4	4	18	25	26	15	7.88	3.114	36.553
s_1_1_SMACv1.0_contig 229	1145	110	59	51	21	321.238	30.02	10	10	17	29	31	17	8.403	3.134	39.476
s_1_1_SMACv1.0_contig 230	743	97	53	44	9	322	28.732	14	14	33	16	26	20	10.787	4.668	34.859
s_1_1_SMACv1.0_contig 231	1124	132	68	64	21	331.238	35.618	15	15	36	20	42	21	9.999	4.595	38.79
s_1_1_SMACv1.0_contig 232	961	104	60	44	22	333.273	21.244	6	6	19	26	39	18	9.375	3.798	35.276
s_1_1_SMACv1.0_contig 233	721	71	35	36	21	342.048	34.62	3	3	15	7	28	19	9.286	3.719	35.784
s_1_1_SMACv1.0_contig 234	952	91	51	40	20	333.7	28.799	9	9	20	10	32	19	8.585	3.627	34.664
s_1_1_SMACv1.0_contig 235	626	80	42	38	16	332.062	25.396	6	6	20	12	25	23	11.631	5.621	33.227
s_1_1_SMACv1.0_contig 236	631	80	39	41	16	330.875	26.833	1	1	30	16	23	19	10.322	4.454	38.035
s_1_1_SMACv1.0_contig 237	587	68	36	32	6	348.667	22.499	8	8	20	19	23	19	8.671	4.177	36.968
s_1_1_SMACv1.0_contig 238	707	73	42	31	15	332.467	32.582	7	7	13	16	31	17	9.197	3.375	35.078
s_1_1_SMACv1.0_contig 239	658	52	33	19	9	344.667	33.17	4	4	14	11	22	23	7.179	5.643	32.979
s_1_1_SMACv1.0_contig 240	525	28	12	16	5	352.2	20.351	5	5	3	5	9	10	5.486	2.764	32.381
s_1_1_SMACv1.0_contig 241	1074	107	56	51	17	326.353	21.293	13	13	42	3	31	22	8.843	3.889	33.52
s_1_1_SMACv1.0_contig 242	859	81	45	36	15	344.2	23.507	5	5	25	15	25	16	7.974	3.507	36.787
s_1_1_SMACv1.0_contig 243	790	117	62	55	17	335.765	29.632	9	9	38	22	37	28	12.9	5.329	35.19
s_1_1_SMACv1.0_contig 244	907	106	56	50	16	327.188	27.213	9	9	39	14	28	20	9.784	3.92	33.627
s_1_1_SMACv1.0_contig 245	691	60	29	31	13	338.385	25.91	3	3	15	13	24	17	6.973	3.441	39.653
s_1_1_SMACv1.0_contig 246	736	58	30	28	9	321	26.637	5	5	16	12	14	14	6.751	2.553	37.636
s_1_1_SMACv1.0_contig 247	646	72	31	41	6	327.5	18.91	5	5	27	23	21	17	7.81	3.666	30.495
s_1_1_SMACv1.0_contig 248	1121	142	70	72	24	340.583	23.067	15	15	43	20	41	21	10.202	4.058	42.551
s_1_1_SMACv1.0_contig 249	841	65	34	31	10	332	41.478	7	7	10	21	27	13	6.709	2.91	34.839
s_1_1_SMACv1.0_contig 250	671	81	47	34	9	343	26.373	8	8	28	15	25	23	10.186	4.719	36.513
s_1_1_SMACv1.0_contig 251	998	122	60	62	31	336.677	28.246	6	6	33	14	48	24	9.995	4.742	45.591
s_1_1_SMACv1.0_contig 252	730	82	44	38	22	340.318	35.37	3	3	23	8	30	18	9.955	3.557	43.014
s_1_1_SMACv1.0_contig 253	914	99	60	39	20	324.15	34.067	6	6	15	31	39	21	9.291	4.625	35.339
s_1_1_SMACv1.0_contig 254	886	145	62	83	21	324.238	24.65	10	10	44	36	58	24	13.501	5.029	35.892
s_1_1_SMACv1.0_contig 255	514	66	35	31	6	338.833	32.127	9	9	24	8	20	19	10.047	4.247	41.44
s_1_1_SMACv1.0_contig 256	528	35	22	13	3	336.333	29.68	5	5	9	9	7	12	5.915	3.074	38.068
s_1_1_SMACv1.0_contig 257	893	101	37	64	15	340.333	28.056	7	7	42	14	27	16	9.165	2.816	30.011
s_1_1_SMACv1.0_contig 258	564	50	19	31	6	336.833	37.047	3	3	13	19	10	12	7.149	2.885	36.525
s_1_1_SMACv1.0_contig 259	703	88	39	49	6	338.667	23.844	14	14	15	32	24	23	10.232	5.452	29.587
s_1_1_SMACv1.0_contig 260	1165	161	91	70	34	330.912	25.249	16	16	42	15	53	28	12.422	5.75	43.691
s_1_1_SMACv1.0_contig 261	1077	136	74	62	17	330.118	36.63	11	11	52	28	33	21	9.08	4.248	37.14
s_1_1_SMACv1.0_contig 262	720	34	15	19	5	324.6	19.21	3	3	1	13	14	12	5.103	2.164	27.778
s_1_1_SMACv1.0_contig 263	810	75	34	41	9	332.111	28.014	3	3	22	28	14	15	7.096	2.651	35.802
s_1_1_SMACv1.0_contig 264	589	42	23	19	8	342.625	25.86	2	2	10	11	12	15	6.545	2.918	36.333
s_1_1_SMACv1.0_contig 265	895	99	54	45	21	323	26.224	9	9	27	12	40	15	9.247	2.737	45.475
s_1_1_SMACv1.0_contig 266	1116	198	101	97	25	332.28	26.695	18	18	68	42	57	37	13.929	7.064	34.857
s_1_1_SMACv1.0_contig 267	793	55	34	21	12	316.333	26.612	2	2	22	4	24	12	6.09	2.651	34.426
s_1_1_SMACv1.0_contig 268	1755	245	132	113	50	338.58	28.086	14	14	60	54	85	24	11.419	4.332	42.621
s_1_1_SMACv1.0_contig 269	566	64	25	39	5	332.8	19.208	3	3	17	28	15	15	8.751	3.304	35.159
s_1_1_SMACv1.0_contig 270	569	75	40	35	5	326	18.45	6	6	20	32	20	21	9.592	4.676	33.568
s_1_1_SMACv1.0_contig 271	598	76	43	33	9	324.556	34.632	5	5	26	19	16	25	11.229	6.395	30.769
s_1_1_SMACv1.0_contig 272	627	21	9	12	2	363	11	3	3	4	6	2	12	3.368	3.241	37.321
s_1_1_SMACv1.0_contig 273	1579	142	70	72	32	330.719	26.637	16	16	10	29	52	19	8.487	4.3	36.035
s_1_1_SMACv1.0_contig 274	1591	311	173	138	47	333.34	32.156	28	28	90	66	96	30	16.316	6.366	37.901
s_1_1_SMACv1.0_contig 275	586	40	18	22	7	323.286	10.43	3	3	7	12	12	12	6.217	2.295	37.543
s_1_1_SMACv1.0_contig 276	727	95	37	58	19	335.842	21.602	3	3	38	13	34	23	10.385	4.586	45.392
s_1_1_SMACv1.0_contig 277	991	116	57	59	10	326.8	17.993	13	13	37	31	30	19	9.549	4.331	37.941
s_1_1_SMACv1.0_contig 278	598	95	49	46	22	336.136	27.043	11	11	23	5	33	33	14.258	8.306	32.274
s_1_1_SMACv1.0_contig 279	578	56	31	25	10	320.8	16.154	7	7	13	9	19	14	8.493	2.872	38.408
s_1_1_SMACv1.0_contig 280	585	168	74	94	13	341.154	21.274	6	6	84	45	46	42	21.663	10.563	46.667
s_1_1_SMACv1.0_contig 281	662	173	79	94	9	333.778	16.349	9	9	80	54	50	35	16.793	7.647	43.958
s_1_1_SMACv1.0_contig 282	1119	163	71	92	30	341.333	21.481	11	11	29	50	44	25	12.013	6.013	37.534
s_1_1_SMACv1.0_contig 283	920	98	50	48	14	330.286	33.674	9	9	31	17	36	18	8.987	3.872	35.109
s_1_1_SMACv1.0_contig 284	684	111	61	50	19	330.895	27.998	12	12	34	15	31	34	12.724	7.6	43.86
s_1_1_SMACv1.0_contig 285	866	106	53	53	14	319.071	35.892	16	16	19	25	36	24	10.68	5.487	31.178
s_1_1_SMACv1.0_contig 286	957	346	187	159	57	331.632	29.377	17	17	110	85	118	54	28.078	10.163	46.813
s_1_1_SMACv1.0_contig 287	727	86	45	41	16	336.25	28.887	8	8	19	17	28	21	10.657	5.513	29.023
s_1_1_SMACv1.0_contig 288	609	69	33	36	10	325.2	27.081	10	10	22	6	15	19	9.064	4.801	40.23
s_1_1_SMACv1.0_contig 289	558	50	23	27	7	346.143	15.264	7	7	16	5	16	18	8.384	3.654	33.692
s_1_1_SMACv1.0_contig 290	726	96	43	53	14	343.143	34.579	6	6	22	34	26	22	10.584	3.758	42.149
s_1_1_SMACv1.0_contig 291	555	126	51	75	13	336.846	32.701	6	6	49	36	42	29	17.798	7.104	36.036
s_1_1_SMACv1.0_contig 292	835	107	64	43	15	338.4	27.276	12	12	12	39	29	22	10.74	5.797	34.85
s_1_1_SMACv1.0_contig 293	625	75	48	27	7	321.143	26.107	11	11	16	23	19	22	9.688	4.631	38.72
s_1_1_SMACv1.0_contig 294	1031	83	43	40	16	326.312	17.377	12	12	17	7	22	18	8.159	3.976	28.71
s_1_1_SMACv1.0_contig 295	519	49	20	29	7	322.429	23.286	2	2	11	20	10	14	7.087	3.193	41.233
s_1_1_SMACv1.0_contig 296	1185	110	48	62	22	337.136	26.84	14	14	17	19	37	18	8.459	3.734	37.3
s_1_1_SMACv1.0_contig 297	683	73	29	44	15	328.2	24.493	5	5	17	14	25	18	8.485	4.475	60.029
s_1_1_SMACv1.0_contig 298	837	126	60	66	14	332.929	18.964	9	9	58	19	44	24	11.93	4.583	38.232
s_1_1_SMACv1.0_contig 299	879	94	48	46	13	346.385	33.475	13	13	23	14	27	26	10.061	5.527	34.699
s_1_1_SMACv1.0_contig 300	691	79	42	37	13	334.769	18.073	5	5	18	22	30	21	10.676	4.495	36.614
s_1_1_SMACv1.0_contig 301	658	94	52	42	7	319.143	19.327	8	8	39	23	22	23	11.666	4.965	34.802
s_1_1_SMACv1.0_contig 302	572	65	28	37	10	334	16.23	2	2	28	12	21	17	8.963	3.408	35.315
s_1_1_SMACv1.0_contig 303	523	55	25	30	5	347.2	19.208	5	5	17	17	14	16	8.325	2.886	42.83
s_1_1_SMACv1.0_contig 304	611	46	25	21	10	338	17.816	5	5	10	4	15	13	8.185	3.541	36.17
s_1_1_SMACv1.0_contig 305	1565	291	139	152	62	332.323	28.111	22	22	71	46	96	32	15.505	7.468	36.933
s_1_1_SMACv1.0_contig 306	720	70	31	39	8	351.125	22.586	5	5	25	18	18	19	8.296	4.215	32.639
s_1_1_SMACv1.0_contig 307	1132	222	104	118	43	338.372	29.339	13	13	74	31	71	37	16.011	7.498	39.753
s_1_1_SMACv1.0_contig 308	1021	104	51	53	19	345.158	29.262	10	10	29	13	33	22	9.549	4.47	32.615
s_1_1_SMACv1.0_contig 309	694	59	27	32	12	341.083	25.121	6	6	6	16	23	12	7.483	2.172	36.599
s_1_1_SMACv1.0_contig 310	916	137	74	63	15	344.267	20.151	13	13	58	20	38	24	11.701	5.029	33.188
s_1_1_SMACv1.0_contig 311	1316	165	80	85	47	336.17	28.891	7	7	26	30	72	24	10.822	4.782	41.489
s_1_1_SMACv1.0_contig 312	1780	318	151	167	68	327.176	31.391	22	22	84	45	119	34	15.555	5.722	40.449
s_1_1_SMACv1.0_contig 313	612	90	42	48	15	347.867	22.668	10	10	23	17	23	24	11.575	4.997	35.294
s_1_1_SMACv1.0_contig 314	620	58	26	32	9	332.556	18.282	2	2	23	13	19	20	7.423	4.611	39.839
s_1_1_SMACv1.0_contig 315	615	62	26	36	13	343.077	20.009	6	6	14	10	19	20	8.351	4.17	34.146
s_1_1_SMACv1.0_contig 316	551	42	22	20	7	311.286	38.28	4	4	16	4	10	12	6.868	2.404	35.209
s_1_1_SMACv1.0_contig 317	585	115	70	45	15	330	40.846	11	11	29	34	31	31	17.509	7.236	42.051
s_1_1_SMACv1.0_contig 318	1129	136	63	73	25	329.56	29.391	11	11	34	28	37	19	9.602	3.628	42.693
s_1_1_SMACv1.0_contig 319	684	59	29	30	6	339.5	35.659	5	5	17	18	19	19	7.731	4.596	30.994
s_1_1_SMACv1.0_contig 320	1213	147	71	76	28	337	25.699	12	12	35	29	51	20	10.051	3.351	45.095
s_1_1_SMACv1.0_contig 321	1114	119	67	52	17	331.588	18.815	9	9	37	29	36	23	8.484	4.526	39.048
s_1_1_SMACv1.0_contig 322	632	84	45	39	7	328.286	30.42	3	3	43	21	27	24	10.09	4.695	46.835
s_1_1_SMACv1.0_contig 323	1042	141	74	67	29	331.828	29.171	11	11	27	31	45	26	11.966	5.443	40.307
s_1_1_SMACv1.0_contig 324	582	37	22	15	2	297.5	27.5	2	2	21	7	11	11	4.627	2.952	28.694
s_1_1_SMACv1.0_contig 325	565	102	53	49	18	327.778	29.658	8	8	23	27	32	28	15.494	6.294	39.115
s_1_1_SMACv1.0_contig 326	498	38	20	18	3	318.667	8.38	6	6	4	16	8	15	6.685	3.293	37.149
s_1_1_SMACv1.0_contig 327	603	51	22	29	9	317.111	25.309	4	4	19	5	14	22	7.92	5.838	32.172
s_1_1_SMACv1.0_contig 328	719	94	52	42	14	320.786	34.015	11	11	29	14	32	26	10.708	5.789	31.293
s_1_1_SMACv1.0_contig 329	1656	249	117	132	45	328.867	29.25	18	18	75	46	77	29	11.72	5.058	43.78
s_1_1_SMACv1.0_contig 330	697	133	72	61	21	344.286	26.517	14	14	32	28	40	43	17.944	9.58	38.307
s_1_1_SMACv1.0_contig 331	808	93	47	46	20	329.1	23.067	12	12	14	11	32	19	11.078	4.701	33.663
s_1_1_SMACv1.0_contig 332	509	33	15	18	6	328.333	26.862	2	2	8	9	11	11	5.527	2.787	38.114
s_1_1_SMACv1.0_contig 333	502	36	21	15	11	329.818	33.739	0	0	10	3	15	11	6.618	2.338	37.052
s_1_1_SMACv1.0_contig 334	891	70	28	42	11	327.364	17.727	9	9	5	24	22	14	6.708	3.248	36.588
s_1_1_SMACv1.0_contig 335	1156	218	102	116	44	338.932	26.565	17	17	59	33	79	40	16.163	8.009	37.37
s_1_1_SMACv1.0_contig 336	788	63	32	31	9	333.667	28.213	9	9	18	9	16	15	6.656	2.483	34.518
s_1_1_SMACv1.0_contig 337	781	86	54	32	17	341.059	24.649	5	5	15	26	23	22	9.794	4.484	41.229
s_1_1_SMACv1.0_contig 338	539	51	26	25	8	314.875	28.799	5	5	12	12	15	13	7.878	3.509	48.794
s_1_1_SMACv1.0_contig 339	1397	208	98	110	43	334.953	32.218	11	11	65	29	75	34	12.507	5.805	43.88
s_1_1_SMACv1.0_contig 340	518	131	79	52	16	329.812	23.383	6	6	61	26	35	32	15.792	7.454	56.564
s_1_1_SMACv1.0_contig 341	557	111	61	50	19	341.789	26.239	3	3	47	19	33	32	16.686	7.767	40.036
s_1_1_SMACv1.0_contig 342	505	85	47	38	7	333	29.394	7	7	39	16	20	24	13.44	5.933	37.624
s_1_1_SMACv1.0_contig 343	1377	292	151	141	52	336	23.149	29	29	77	49	81	30	17.41	6.844	40.741
s_1_1_SMACv1.0_contig 344	517	115	59	56	20	313.6	29.437	11	11	21	30	29	35	20.019	8.921	38.298
s_1_1_SMACv1.0_contig 345	754	85	31	54	14	343.143	22.542	8	8	25	15	27	25	9.623	5.531	35.411
s_1_1_SMACv1.0_contig 346	620	132	66	66	9	326	35.79	11	11	59	28	35	28	16.092	6.539	36.935
s_1_1_SMACv1.0_contig 347	596	86	46	40	12	354.5	24.019	4	4	31	23	28	22	10.539	4.1	34.899
s_1_1_SMACv1.0_contig 348	916	105	54	51	16	329.5	27.733	4	4	28	35	34	22	9.965	4.379	31.223
s_1_1_SMACv1.0_contig 349	1003	94	49	45	21	334.571	29.553	8	8	17	19	33	14	8.286	2.679	35.693
s_1_1_SMACv1.0_contig 350	786	106	44	62	24	330.333	29.147	8	8	20	20	35	23	12.081	5.393	40.585
s_1_1_SMACv1.0_contig 351	1009	149	68	81	26	333.5	27.265	9	9	37	39	55	22	11.389	4.319	41.229
s_1_1_SMACv1.0_contig 352	792	95	51	44	16	337.625	33.799	7	7	30	16	40	19	10.816	4.345	42.551
s_1_1_SMACv1.0_contig 353	1038	91	45	46	22	339.955	28.316	5	5	11	24	35	14	7.823	3.095	37.283
s_1_1_SMACv1.0_contig 354	950	115	56	59	28	327.214	24.408	8	8	19	23	38	23	10.575	5.214	39.368
s_1_1_SMACv1.0_contig 355	1396	206	114	92	42	342.429	20.724	19	19	54	25	84	31	12.914	6.325	33.811
s_1_1_SMACv1.0_contig 356	543	102	56	46	13	318.308	25.119	5	5	35	28	24	25	15.195	5.698	39.595
s_1_1_SMACv1.0_contig 357	632	56	24	32	10	324.5	20.68	4	4	10	16	19	17	7.818	3.444	36.867
s_1_1_SMACv1.0_contig 358	582	42	22	20	8	327.375	43.099	3	3	9	10	11	11	6.268	2.776	36.942
s_1_1_SMACv1.0_contig 359	540	22	8	14	0			1	1	13	6	8	10	3.259	2.443	36.296
s_1_1_SMACv1.0_contig 360	674	96	48	48	12	329.583	25.323	8	8	39	14	33	29	10.623	5.317	33.086
s_1_1_SMACv1.0_contig 361	748	87	43	44	14	337.857	26.011	8	8	34	8	22	18	9.537	3.989	39.305
s_1_1_SMACv1.0_contig 362	806	66	41	25	6	338.333	14.985	8	8	24	10	20	16	7.691	3.533	36.973
s_1_1_SMACv1.0_contig 363	572	55	35	20	5	323.6	42.136	10	10	20	4	10	23	8.021	5.044	31.818
s_1_1_SMACv1.0_contig 364	1350	177	91	86	39	334.308	27.597	15	15	35	33	62	22	11.342	4.808	41.037
s_1_1_SMACv1.0_contig 365	837	60	34	26	13	328.692	23.525	3	3	8	19	18	11	6.158	2.593	30.585
s_1_1_SMACv1.0_contig 366	921	120	53	67	24	332.083	30.643	5	5	37	23	37	24	10.668	5.092	44.951
s_1_1_SMACv1.0_contig 367	944	65	35	30	12	328.917	22.437	7	7	15	10	22	14	7.019	3.264	37.5
s_1_1_SMACv1.0_contig 368	1086	79	41	38	16	333.375	18.401	13	13	7	11	32	14	6.948	2.562	35.451
s_1_1_SMACv1.0_contig 369	991	137	59	78	14	341.643	21.155	11	11	63	20	34	24	10.576	4.899	32.694
s_1_1_SMACv1.0_contig 370	1139	236	132	104	47	320.426	24.23	8	8	71	53	80	36	16.607	7.438	42.318
s_1_1_SMACv1.0_contig 371	1202	121	65	56	22	327.273	28.424	13	13	36	12	35	19	8.7	3.473	31.032
s_1_1_SMACv1.0_contig 372	845	118	60	58	29	337.724	28.504	4	4	33	17	46	20	12.613	4.436	47.337
s_1_1_SMACv1.0_contig 373	663	174	78	96	22	331.409	21.964	8	8	59	49	55	41	20.674	8.23	46.305
s_1_1_SMACv1.0_contig 374	789	86	45	41	12	313.667	24.15	8	8	33	13	22	18	8.667	3.606	37.643
s_1_1_SMACv1.0_contig 375	534	33	14	19	7	329.286	20.218	4	4	4	4	13	14	7.14	3.334	30.712
s_1_1_SMACv1.0_contig 376	628	102	51	51	12	319.75	35.924	5	5	31	37	31	27	11.943	6.495	43.631
s_1_1_SMACv1.0_contig 377	814	80	39	41	10	326.9	27.274	11	11	25	12	20	21	7.937	3.274	43.366
s_1_1_SMACv1.0_contig 378	598	63	32	31	5	327	20.386	2	2	29	19	15	18	9.055	4.177	38.462
s_1_1_SMACv1.0_contig 379	634	195	92	103	13	331.385	27.575	6	6	104	52	52	30	17.483	5.373	56.782
s_1_1_SMACv1.0_contig 380	1079	156	69	87	20	331.85	23.301	13	13	62	24	60	23	12.004	4.915	37.72
s_1_1_SMACv1.0_contig 381	753	42	16	26	11	335.364	28.465	3	3	11	2	15	13	5.692	3.065	38.114
s_1_1_SMACv1.0_contig 382	501	115	67	48	15	339.467	23.243	8	8	42	27	36	33	14.721	6.829	71.058
s_1_1_SMACv1.0_contig 383	877	231	99	132	24	319.917	30.421	8	8	64	97	77	34	16.794	7.947	66.363
s_1_1_SMACv1.0_contig 384	1622	210	98	112	45	333.489	27.302	14	14	51	37	63	25	11.038	5.342	36.498
s_1_1_SMACv1.0_contig 385	696	129	60	69	19	331.105	28.185	7	7	58	18	42	31	14.343	6.839	38.075
s_1_1_SMACv1.0_contig 386	502	36	15	21	6	322.333	31.154	2	2	10	10	12	12	5.729	2.549	38.645
s_1_1_SMACv1.0_contig 387	690	80	35	45	10	338.9	27.617	3	3	24	29	16	16	8.572	4.079	40.29
s_1_1_SMACv1.0_contig 388	738	83	51	32	8	333.5	27.586	10	10	13	33	20	18	9.356	3.682	38.889
s_1_1_SMACv1.0_contig 389	962	102	59	43	19	333.947	16.851	6	6	44	6	33	17	8.816	4.152	51.247
s_1_1_SMACv1.0_contig 390	516	48	29	19	4	326.5	21.697	7	7	9	16	16	19	7.721	4.05	39.341
s_1_1_SMACv1.0_contig 391	728	136	63	73	22	326.409	27.999	11	11	40	28	47	26	15.06	6.528	36.813
s_1_1_SMACv1.0_contig 392	631	41	28	13	3	318.667	11.557	3	3	21	7	13	14	5.813	3.962	32.488
s_1_1_SMACv1.0_contig 393	867	136	65	71	29	338.276	21.654	9	9	28	25	50	35	14.863	7.885	34.948
s_1_1_SMACv1.0_contig 394	556	97	52	45	8	316.5	23.054	8	8	48	17	24	24	13.189	5.384	43.705
s_1_1_SMACv1.0_contig 395	1392	160	76	84	32	330.312	27.912	9	9	41	34	57	21	9.749	3.786	37.644
s_1_1_SMACv1.0_contig 396	512	37	21	16	6	323	17.72	6	6	5	8	10	13	6.5	2.988	36.523
s_1_1_SMACv1.0_contig 397	1259	163	75	88	37	336.378	29.125	11	11	43	21	60	22	10.91	3.644	43.447
s_1_1_SMACv1.0_contig 398	831	129	74	55	22	335.227	22.44	9	9	45	19	38	32	13.296	6.433	39.952
s_1_1_SMACv1.0_contig 399	715	84	44	40	13	341.462	21.784	7	7	13	29	22	17	10.162	3.364	36.643
s_1_1_SMACv1.0_contig 400	573	56	24	32	12	333.667	19.589	2	2	15	13	18	14	7.932	3.086	39.092
s_1_1_SMACv1.0_contig 401	1248	112	57	55	19	347.579	23.075	10	10	28	24	32	19	7.681	3.986	34.696
s_1_1_SMACv1.0_contig 402	565	75	37	38	12	336.5	20.006	10	10	19	12	19	24	11.389	6.074	35.929
s_1_1_SMACv1.0_contig 403	582	51	31	20	7	346.857	25.514	5	5	11	12	19	16	7.689	4.088	36.942
s_1_1_SMACv1.0_contig 404	960	161	76	85	21	332.476	29.017	16	16	43	41	51	27	13.856	5.309	36.667
s_1_1_SMACv1.0_contig 405	1126	303	157	146	58	335.086	21.198	14	14	99	56	90	45	21.317	8.48	43.606
s_1_1_SMACv1.0_contig 406	1966	468	243	225	98	336.612	30.716	29	29	121	86	162	40	19.747	7.772	41.099
s_1_1_SMACv1.0_contig 407	865	113	51	62	17	326.941	33.499	10	10	41	16	28	26	10.963	5.407	37.457
s_1_1_SMACv1.0_contig 408	975	125	63	62	23	345.435	32.377	17	17	17	26	35	26	11.806	4.793	36.41
s_1_1_SMACv1.0_contig 409	740	82	36	46	15	332.267	15.998	11	11	18	11	27	19	9.532	3.737	34.73
s_1_1_SMACv1.0_contig 410	607	95	48	47	16	343.875	30.753	6	6	25	26	32	24	12.091	5.738	42.339
s_1_1_SMACv1.0_contig 411	541	61	30	31	7	329	18.67	3	3	14	27	17	16	9.007	3.765	35.12
s_1_1_SMACv1.0_contig 412	1056	71	33	38	7	320.571	21.104	5	5	25	20	24	12	5.715	2.797	32.86
s_1_1_SMACv1.0_contig 413	1608	233	112	121	39	334.359	25.788	21	21	59	46	80	26	12.557	4.44	33.893
s_1_1_SMACv1.0_contig 414	765	103	50	53	11	316.545	21.296	9	9	36	25	28	22	11.323	5.016	39.346
s_1_1_SMACv1.0_contig 415	580	35	16	19	5	348.4	27.861	4	4	11	6	8	10	5.226	1.846	30.69
s_1_1_SMACv1.0_contig 416	813	258	153	105	47	332.745	29.024	11	11	100	37	76	42	22.97	9.862	47.109
s_1_1_SMACv1.0_contig 417	592	113	59	54	20	336.85	22.729	8	8	36	16	32	30	16.176	5.644	43.919
s_1_1_SMACv1.0_contig 418	796	89	46	43	20	330.15	34.257	4	4	21	19	32	19	9.191	4.258	37.437
s_1_1_SMACv1.0_contig 419	1192	164	91	73	23	338.043	29.405	15	15	54	29	49	26	11.879	4.572	34.06
s_1_1_SMACv1.0_contig 420	1043	135	71	64	28	340.286	23.934	12	12	30	24	48	18	10.539	3.501	37.584
s_1_1_SMACv1.0_contig 421	754	91	37	54	16	324.312	24.015	9	9	14	23	28	22	10.17	5.128	53.979
s_1_1_SMACv1.0_contig 422	1407	197	87	110	43	333.558	33.688	14	14	37	39	67	25	13.005	4.965	35.466
s_1_1_SMACv1.0_contig 423	808	89	45	44	16	336	28.48	9	9	15	21	31	20	9.634	4.971	35.891
s_1_1_SMACv1.0_contig 424	1778	208	106	102	59	325.661	25.411	19	19	24	27	85	26	10.975	4.166	39.314
s_1_1_SMACv1.0_contig 425	2071	239	117	122	50	360.22	193.909	22	22	55	35	75	19	10.006	3.734	31.724
s_1_1_SMACv1.0_contig 426	1174	192	96	96	42	324	28.255	9	9	54	35	66	25	12.989	4.826	43.612
s_1_1_SMACv1.0_contig 427	548	40	20	20	2	348	28	6	6	12	12	8	13	5.776	2.742	33.759
s_1_1_SMACv1.0_contig 428	615	36	17	19	5	325.6	43.711	4	4	10	5	12	11	5.958	2.845	30.569
s_1_1_SMACv1.0_contig 429	607	67	32	35	9	321.222	37.829	5	5	26	13	19	15	7.972	2.973	33.773
s_1_1_SMACv1.0_contig 430	704	73	39	34	11	333.182	35.311	2	2	23	23	25	18	8.425	3.107	32.67
s_1_1_SMACv1.0_contig 431	535	67	33	34	6	319	18	6	6	24	19	18	17	9.585	3.898	33.832
s_1_1_SMACv1.0_contig 432	1240	176	71	105	31	330.032	30.041	17	17	35	41	56	24	11.97	4.769	34.435
s_1_1_SMACv1.0_contig 433	950	107	63	44	17	331.529	26.564	9	9	27	28	32	16	8.941	3.27	41.579
s_1_1_SMACv1.0_contig 434	993	158	80	78	26	332.423	30.754	14	14	48	28	46	28	12.916	6.251	33.434
s_1_1_SMACv1.0_contig 435	618	66	33	33	10	330.7	22.891	4	4	18	19	28	14	8.739	2.923	35.437
s_1_1_SMACv1.0_contig 436	628	71	29	42	11	319.091	27.268	6	6	25	9	19	21	10.051	5.234	32.803
s_1_1_SMACv1.0_contig 437	501	91	48	43	9	329.444	35.331	8	8	34	21	29	30	15.267	6.725	35.13
s_1_1_SMACv1.0_contig 438	873	98	57	41	13	328.385	19.89	11	11	21	27	27	21	9.635	4.14	35.739
s_1_1_SMACv1.0_contig 439	854	58	37	21	6	350.5	22.239	3	3	12	23	18	11	6.036	2.573	49.415
s_1_1_SMACv1.0_contig 440	710	64	33	31	18	324.611	31.426	4	4	8	11	26	17	8.149	3.767	44.225
s_1_1_SMACv1.0_contig 441	603	55	29	26	11	333.364	28.343	2	2	17	11	23	17	8.35	3.672	42.952
s_1_1_SMACv1.0_contig 442	1512	219	111	108	40	327.95	27.111	13	13	55	54	78	23	11.087	4.388	43.783
s_1_1_SMACv1.0_contig 443	1604	168	92	76	30	340.033	32.474	18	18	41	30	54	18	8.945	3.986	35.599
s_1_1_SMACv1.0_contig 444	609	58	28	30	4	316	14.509	7	7	28	6	13	17	8.059	3.565	29.392
s_1_1_SMACv1.0_contig 445	543	131	85	46	9	312.333	25.153	6	6	49	51	29	34	18.376	7.803	40.7
s_1_1_SMACv1.0_contig 446	1345	182	92	90	40	339.3	29.587	19	19	29	34	64	28	11.946	5.045	44.535
s_1_1_SMACv1.0_contig 447	694	95	44	51	11	332.273	23.611	9	9	28	27	27	25	9.981	5.654	32.709
s_1_1_SMACv1.0_contig 448	1431	148	78	70	30	337.933	31.283	11	11	39	24	44	19	8.784	3.424	38.365
s_1_1_SMACv1.0_contig 449	1020	171	80	91	31	327.29	20.582	17	17	35	35	56	28	15.567	6.148	36.765
s_1_1_SMACv1.0_contig 450	1523	270	138	132	44	335.636	23.406	20	20	95	42	75	30	14.263	5.746	36.638
s_1_1_SMACv1.0_contig 451	1677	187	91	96	44	335.136	29.059	18	18	27	29	71	24	10.657	4.147	39.475
s_1_1_SMACv1.0_contig 452	731	73	53	20	12	345.833	26.941	2	2	19	26	22	12	7.401	2.461	42.681
s_1_1_SMACv1.0_contig 453	842	86	50	36	14	336.429	31.02	7	7	19	24	24	18	8.552	4.439	34.442
s_1_1_SMACv1.0_contig 454	1365	179	78	101	41	335.805	25.436	13	13	39	31	61	25	10.978	4.444	44.029
s_1_1_SMACv1.0_contig 455	920	90	50	40	16	334.625	23.598	3	3	23	28	29	16	7.803	3.457	36.63
s_1_1_SMACv1.0_contig 456	1377	227	111	116	33	326.455	30.011	15	15	70	57	64	21	12.385	4.262	37.255
s_1_1_SMACv1.0_contig 457	508	75	29	46	3	308.333	34.922	5	5	31	27	21	21	10.805	4.559	35.236
s_1_1_SMACv1.0_contig 458	622	50	25	25	6	311.5	28.745	7	7	14	8	9	12	7.738	2.37	34.566
s_1_1_SMACv1.0_contig 459	1788	225	122	103	47	333.043	26.01	19	19	44	47	75	23	10.123	4.455	43.009
s_1_1_SMACv1.0_contig 460	743	58	35	23	10	336.6	29.309	4	4	18	9	19	15	7.427	3.947	34.993
s_1_1_SMACv1.0_contig 461	943	117	56	61	19	335.316	17.797	12	12	37	16	39	21	10.897	4.722	34.677
s_1_1_SMACv1.0_contig 462	1241	161	83	78	27	328.407	30.904	20	20	32	34	52	22	10.918	4.335	46.011
s_1_1_SMACv1.0_contig 463	764	138	68	70	17	328.588	35.622	13	13	38	40	35	30	13.924	6.03	39.005
s_1_1_SMACv1.0_contig 464	561	74	33	41	7	347	17.68	9	9	22	16	18	22	12.342	4.456	37.077
s_1_1_SMACv1.0_contig 465	672	122	75	47	17	332.412	31.365	8	8	34	33	47	32	16.037	8.238	40.327
s_1_1_SMACv1.0_contig 466	717	152	77	75	33	329.364	31.547	13	13	46	14	47	29	17.833	7.53	38.075
s_1_1_SMACv1.0_contig 467	520	39	19	20	7	340.286	17.433	3	3	10	9	13	14	6.729	3.272	35
s_1_1_SMACv1.0_contig 468	615	58	30	28	9	330.444	30.141	6	6	17	11	19	13	7.979	3.191	35.61
s_1_1_SMACv1.0_contig 469	512	138	58	80	6	322.333	30.554	9	9	67	39	33	40	19.846	7.97	37.5
s_1_1_SMACv1.0_contig 470	1424	214	95	119	48	335.062	25.649	11	11	60	31	73	26	12.683	5.606	35.744
s_1_1_SMACv1.0_contig 471	1173	123	52	71	22	333.909	30.172	13	13	26	24	39	19	9.292	3.814	34.186
s_1_1_SMACv1.0_contig 472	612	84	43	41	8	333	24.587	8	8	36	15	27	23	10.503	5.386	40.686
s_1_1_SMACv1.0_contig 473	643	53	19	34	6	334.333	20.491	7	7	13	14	11	10	6.891	2.202	35.925
s_1_1_SMACv1.0_contig 474	727	66	42	24	7	336.429	26.559	8	8	21	15	18	16	6.856	3.494	38.102
s_1_1_SMACv1.0_contig 475	638	51	26	25	5	327.2	27.154	9	9	12	9	18	13	7.216	2.779	31.661
s_1_1_SMACv1.0_contig 476	504	78	47	31	9	335.444	34.355	3	3	28	25	22	21	11.966	4.431	38.69
s_1_1_SMACv1.0_contig 477	875	206	107	99	30	325.767	30.549	13	13	78	42	62	39	18.237	9.613	39.543
s_1_1_SMACv1.0_contig 478	745	93	49	44	11	342	31.363	7	7	27	28	24	24	9.754	5.856	34.631
s_1_1_SMACv1.0_contig 479	547	143	64	79	19	332.737	21.491	7	7	46	44	47	36	18.38	9.075	45.704
s_1_1_SMACv1.0_contig 480	958	126	61	65	27	327.741	36.655	9	9	35	18	45	22	10.428	4.392	39.353
s_1_1_SMACv1.0_contig 481	708	56	31	25	10	329.5	23.066	6	6	14	9	19	14	6.884	3.677	36.582
s_1_1_SMACv1.0_contig 482	506	30	15	15	4	327.25	32.545	4	4	6	8	8	11	5.269	2.13	33.004
s_1_1_SMACv1.0_contig 483	1584	131	64	67	27	342.593	27.593	17	17	26	14	39	16	7.865	3.487	35.859
s_1_1_SMACv1.0_contig 484	1217	95	54	41	19	326.263	32.866	11	11	15	19	30	13	7.249	2.698	35.661
s_1_1_SMACv1.0_contig 485	743	61	24	37	10	337.1	30.755	6	6	16	11	16	14	7.081	2.821	28.129
s_1_1_SMACv1.0_contig 486	828	77	35	42	15	326.333	20.49	9	9	15	13	22	18	8.473	4.495	38.527
s_1_1_SMACv1.0_contig 487	602	52	25	27	8	345.625	24.97	3	3	13	16	17	15	7.729	3.199	40.365
s_1_1_SMACv1.0_contig 488	1111	163	74	89	39	329.718	28	8	8	38	30	49	26	12.229	5.255	38.614
s_1_1_SMACv1.0_contig 489	534	104	44	60	12	337.917	23.415	9	9	29	29	27	23	16.348	5.374	39.513
s_1_1_SMACv1.0_contig 490	776	72	39	33	10	337.3	22.249	10	10	19	11	21	13	7.985	2.798	34.536
s_1_1_SMACv1.0_contig 491	694	73	36	37	17	333.941	30.069	6	6	13	14	29	15	9.082	2.955	41.066
s_1_1_SMACv1.0_contig 492	1074	122	55	67	28	331.179	19.452	8	8	25	22	51	23	10.327	5.124	43.948
s_1_1_SMACv1.0_contig 493	812	141	79	62	18	331.611	31.967	9	9	45	42	43	28	13.223	6.649	37.438
s_1_1_SMACv1.0_contig 494	818	82	42	40	11	354.364	22.596	6	6	35	12	25	16	7.587	3.623	33.252
s_1_1_SMACv1.0_contig 495	724	68	37	31	16	331.75	21.467	6	6	11	13	25	15	8.033	3.193	40.055
s_1_1_SMACv1.0_contig 496	642	78	28	50	7	329.571	20.134	7	7	17	30	18	20	10.657	5.002	40.343
s_1_1_SMACv1.0_contig 497	828	87	41	46	14	330.786	27.605	5	5	20	26	31	16	8.943	3.339	35.507
s_1_1_SMACv1.0_contig 498	1316	214	121	93	38	333	30.225	15	15	67	40	73	26	12.695	5.128	43.313
s_1_1_SMACv1.0_contig 499	577	54	26	28	8	324.25	26.238	6	6	9	17	17	15	8.478	3.03	36.915
s_1_1_SMACv1.0_contig 500	1051	95	38	57	16	335.688	29.101	6	6	25	19	41	19	8.257	5.37	41.199
s_1_1_SMACv1.0_contig 501	627	31	19	12	2	332.5	12.5	1	1	12	13	6	12	3.603	3.162	33.812
s_1_1_SMACv1.0_contig 502	1200	128	65	63	17	327.353	31.606	16	16	25	33	33	19	9.233	3.21	38
s_1_1_SMACv1.0_contig 503	579	43	21	22	11	350.091	16.451	3	3	5	10	19	12	6.831	3.166	41.278
s_1_1_SMACv1.0_contig 504	897	123	60	63	24	337.958	26.534	12	12	26	19	39	24	12.272	5.27	34.337
s_1_1_SMACv1.0_contig 505	729	92	42	50	25	324.12	19.021	5	5	17	14	32	22	10.446	5.615	43.073
s_1_1_SMACv1.0_contig 506	989	140	79	61	20	334.8	18.206	16	16	44	19	43	24	12.643	5.991	35.693
s_1_1_SMACv1.0_contig 507	803	93	46	47	13	334	22.271	9	9	25	22	21	20	9.619	3.846	38.73
s_1_1_SMACv1.0_contig 508	546	110	56	54	7	341.143	16.146	8	8	38	41	21	34	15.603	7.916	38.278
s_1_1_SMACv1.0_contig 509	692	80	32	48	11	335.364	34.238	8	8	24	17	22	19	8.798	4.004	36.127
s_1_1_SMACv1.0_contig 510	503	52	25	27	9	339.222	37.019	3	3	8	20	15	16	8.181	4.109	32.803
s_1_1_SMACv1.0_contig 511	631	65	36	29	10	331.4	34.59	6	6	24	9	19	15	8.334	3.854	45.483
s_1_1_SMACv1.0_contig 512	517	65	35	30	2	344	12	4	4	29	22	12	22	10.058	5.476	37.137
s_1_1_SMACv1.0_contig 513	502	140	68	72	8	334.125	18.516	2	2	68	49	33	35	19.494	6.801	53.386
s_1_1_SMACv1.0_contig 514	528	31	16	15	2	336.5	0.5	3	3	12	9	7	13	4.909	2.807	39.394
s_1_1_SMACv1.0_contig 515	671	50	22	28	8	337.875	22.707	6	6	11	11	16	16	6.429	3.697	32.042
s_1_1_SMACv1.0_contig 516	967	121	64	57	19	327.211	31.836	10	10	37	25	41	22	10.702	3.831	36.711
s_1_1_SMACv1.0_contig 517	2143	350	176	174	87	384.713	259.976	35	35	54	45	135	33	14.705	6.038	38.264
s_1_1_SMACv1.0_contig 518	858	158	56	102	22	328.364	39.82	7	7	61	34	57	31	14.493	6.251	42.308
s_1_1_SMACv1.0_contig 519	533	87	40	47	5	318.4	16.645	7	7	45	15	33	26	13.266	7.118	36.21
s_1_1_SMACv1.0_contig 520	688	66	32	34	10	344.1	30.752	4	4	14	22	26	17	8.834	3.765	38.081
s_1_1_SMACv1.0_contig 521	618	61	36	25	15	321.533	33.502	4	4	14	9	23	19	8.623	3.923	40.291
s_1_1_SMACv1.0_contig 522	969	147	72	75	19	331.053	25.867	15	15	66	10	40	26	12.67	5.606	38.184
s_1_1_SMACv1.0_contig 523	1097	112	59	53	17	324.882	23.637	11	11	39	15	24	17	7.858	3.016	32.179
s_1_1_SMACv1.0_contig 524	1459	137	73	64	33	337.788	26.967	6	6	35	17	49	26	9.256	4.494	37.56
s_1_1_SMACv1.0_contig 525	500	60	32	28	6	327.667	26.228	7	7	19	15	16	21	9.814	5.138	30.8
s_1_1_SMACv1.0_contig 526	860	144	81	63	14	348.571	20.962	15	15	54	30	41	28	12.706	6.129	35.698
s_1_1_SMACv1.0_contig 527	739	38	16	22	4	337.5	25.244	3	3	13	8	13	10	5.202	2.15	29.635
s_1_1_SMACv1.0_contig 528	1158	87	49	38	13	327.385	22.97	6	6	32	13	25	15	6.456	2.8	35.924
s_1_1_SMACv1.0_contig 529	510	93	74	19	0			4	4	56	27	32	31	9.325	8.125	75.49
s_1_1_SMACv1.0_contig 530	556	44	21	23	5	315	20.169	6	6	17	4	17	17	7.25	3.688	31.475
s_1_1_SMACv1.0_contig 531	2039	250	124	126	45	331.489	28.95	33	33	39	50	84	24	10.412	3.906	31.339
s_1_1_SMACv1.0_contig 532	652	84	45	39	6	338.167	36.274	7	7	30	25	23	17	9.324	3.854	41.258
s_1_1_SMACv1.0_contig 533	557	73	36	37	4	322	26.268	9	9	19	27	18	20	10.359	4.246	38.241
s_1_1_SMACv1.0_contig 534	720	60	28	32	16	327.938	24.147	1	1	17	8	22	13	7.847	2.295	34.583
s_1_1_SMACv1.0_contig 535	840	66	34	32	16	318.062	23.952	4	4	18	4	24	22	8.5	6.75	33.333
s_1_1_SMACv1.0_contig 536	1330	138	71	67	29	335.034	22.579	12	12	42	13	46	18	8.896	3.357	41.128
s_1_1_SMACv1.0_contig 537	810	119	59	60	19	332.474	27.031	13	13	41	13	36	24	11.493	5.619	32.84
s_1_1_SMACv1.0_contig 538	684	60	36	24	10	336.2	31.632	4	4	16	16	19	14	7.341	2.691	35.38
s_1_1_SMACv1.0_contig 539	724	64	33	31	15	337.733	20.625	5	5	11	11	21	15	8.062	3.428	37.569
s_1_1_SMACv1.0_contig 540	1098	120	59	61	25	330.28	25.794	11	11	25	22	36	15	9.114	3.326	40.437
s_1_1_SMACv1.0_contig 541	657	48	25	23	2	312	21	2	2	27	8	14	15	6.953	3.845	37.291
s_1_1_SMACv1.0_contig 542	1093	138	59	79	28	337	27.768	9	9	37	25	51	20	10.708	3.854	40.622
s_1_1_SMACv1.0_contig 543	1122	106	51	55	20	324.45	30.691	7	7	28	23	37	14	7.569	2.545	35.651
s_1_1_SMACv1.0_contig 544	858	143	70	73	21	337.857	24.214	8	8	41	42	42	25	12.966	5.521	35.897
s_1_1_SMACv1.0_contig 545	935	96	43	53	19	331.684	28.481	2	2	34	17	30	17	8.873	3.405	35.936
s_1_1_SMACv1.0_contig 546	654	92	46	46	8	316	37.35	11	11	30	22	29	25	12.414	5.786	35.627
s_1_1_SMACv1.0_contig 547	729	68	30	38	13	340.154	30.099	0	0	22	17	21	18	8.361	4.027	33.471
s_1_1_SMACv1.0_contig 548	848	81	47	34	13	348.923	29.021	4	4	22	24	17	15	7.435	3.42	37.382
s_1_1_SMACv1.0_contig 549	833	75	33	42	12	330.167	22.505	7	7	21	13	27	15	7.909	3.127	34.694
s_1_1_SMACv1.0_contig 550	910	77	40	37	16	336.5	24.408	9	9	11	16	25	15	7.248	3.098	37.143
s_1_1_SMACv1.0_contig 551	1080	170	79	91	19	325.579	34.579	24	24	49	31	49	23	12.267	4.345	34.352
s_1_1_SMACv1.0_contig 552	595	57	25	32	4	310	27.613	5	5	26	12	19	12	6.689	2.754	40
s_1_1_SMACv1.0_contig 553	696	79	36	43	13	333.385	46.912	4	4	21	23	28	20	8.828	3.732	34.914
s_1_1_SMACv1.0_contig 554	1158	143	64	79	27	334	32.235	11	11	30	36	46	18	9.745	3.406	36.528
s_1_1_SMACv1.0_contig 555	549	40	18	22	7	327.571	11.287	2	2	9	12	12	14	6.401	2.365	35.337
s_1_1_SMACv1.0_contig 556	1138	142	56	86	21	325.619	28.513	10	10	43	35	40	35	11.083	8.14	37.346
s_1_1_SMACv1.0_contig 557	630	48	21	27	11	326.636	29.46	2	2	9	12	21	14	6.987	2.908	34.603
s_1_1_SMACv1.0_contig 558	1108	191	108	83	34	329.265	34.572	12	12	56	41	57	26	13.786	5.72	30.776
s_1_1_SMACv1.0_contig 559	552	85	48	37	17	332	33.069	6	6	21	18	28	25	14.072	6.062	35.507
s_1_1_SMACv1.0_contig 560	766	88	40	48	13	324.462	23.382	10	10	28	11	31	18	10.117	4.19	36.945
s_1_1_SMACv1.0_contig 561	1025	121	64	57	24	333.542	33.851	11	11	32	17	36	30	10.106	6.546	33.073
s_1_1_SMACv1.0_contig 562	661	82	50	32	14	341	26.769	3	3	32	16	19	22	9.186	4.273	36.46
s_1_1_SMACv1.0_contig 563	658	86	50	36	16	325.688	22.775	5	5	20	24	37	20	10.406	4.315	41.033
s_1_1_SMACv1.0_contig 564	567	47	25	22	8	336	12.787	4	4	20	2	17	18	8.249	4.051	35.273
s_1_1_SMACv1.0_contig 565	901	89	48	41	18	337.778	32.954	8	8	23	14	29	20	8.21	3.432	33.407
s_1_1_SMACv1.0_contig 566	1054	98	47	51	15	329.133	31.831	11	11	26	15	39	19	8.927	4.581	32.638
s_1_1_SMACv1.0_contig 567	699	67	31	36	8	325.875	18.798	12	12	12	13	18	17	8.731	3.833	36.91
s_1_1_SMACv1.0_contig 568	1262	211	106	105	32	337.531	24.486	16	16	72	38	67	29	13.172	5.889	36.688
s_1_1_SMACv1.0_contig 569	526	89	32	57	11	329.091	23.357	14	14	20	15	29	36	15.278	9.688	43.916
s_1_1_SMACv1.0_contig 570	580	55	20	35	3	361.667	17.327	4	4	36	4	11	19	7.424	4.794	32.931
s_1_1_SMACv1.0_contig 571	739	106	53	53	11	317.455	23.585	10	10	36	27	24	24	11.041	5.73	34.1
s_1_1_SMACv1.0_contig 572	1101	146	83	63	28	341.214	26.796	16	16	37	20	47	34	10.936	7.196	36.149
s_1_1_SMACv1.0_contig 573	1132	82	41	41	13	341.308	28.009	12	12	13	15	24	18	6.981	3.139	34.187
s_1_1_SMACv1.0_contig 574	859	121	63	58	23	333.609	21.677	10	10	24	26	45	24	12.936	5.531	33.411
s_1_1_SMACv1.0_contig 575	541	70	36	34	5	332.2	13.746	4	4	41	11	21	19	9.409	4.346	35.12
s_1_1_SMACv1.0_contig 576	702	75	37	38	13	339.462	21.714	7	7	20	15	22	17	9.387	3.472	37.464
s_1_1_SMACv1.0_contig 577	1345	237	112	125	40	333.15	26.195	21	21	69	36	69	28	15.083	5.478	36.803
s_1_1_SMACv1.0_contig 578	494	30	14	16	5	329.4	30.302	1	1	12	6	9	10	4.994	2.51	36.032
s_1_1_SMACv1.0_contig 579	1036	147	84	63	32	326.25	35.509	17	17	26	19	48	28	12.659	5.609	35.039
s_1_1_SMACv1.0_contig 580	846	145	70	75	27	347	32.492	11	11	42	24	45	27	14.24	5.454	34.397
s_1_1_SMACv1.0_contig 581	792	74	40	34	17	335.765	31.848	6	6	14	12	30	20	8.956	4.476	38.384
s_1_1_SMACv1.0_contig 582	929	84	42	42	19	346	25.022	7	7	22	10	33	18	7.693	3.648	39.397
s_1_1_SMACv1.0_contig 583	768	162	81	81	34	332.382	30.593	14	14	38	27	50	32	17.534	7.528	38.932
s_1_1_SMACv1.0_contig 584	595	40	21	19	4	334.25	30.703	3	3	14	11	12	12	5.672	2.464	37.143
s_1_1_SMACv1.0_contig 585	501	43	20	23	0			3	3	22	12	17	18	7.289	4.026	33.134
s_1_1_SMACv1.0_contig 586	962	73	37	36	15	350.733	21.477	8	8	8	17	24	15	6.721	2.259	33.992
s_1_1_SMACv1.0_contig 587	717	78	42	36	14	331.929	28.826	3	3	16	26	22	16	8.661	3.421	49.372
s_1_1_SMACv1.0_contig 588	755	121	61	60	22	330.091	22.058	9	9	31	27	40	26	13.285	6.116	33.51
s_1_1_SMACv1.0_contig 589	521	34	23	11	3	348	8.485	1	1	12	11	10	13	5.679	2.45	36.66
s_1_1_SMACv1.0_contig 590	532	90	52	38	6	332.167	32.246	6	6	33	30	22	27	12.618	6.982	36.654
s_1_1_SMACv1.0_contig 591	611	87	45	42	10	321.3	22.848	14	14	25	12	29	21	13.165	3.577	35.843
s_1_1_SMACv1.0_contig 592	834	101	43	58	15	332.067	32.919	4	4	32	31	26	22	8.67	4.44	40.528
s_1_1_SMACv1.0_contig 593	767	90	44	46	15	336.933	33.314	8	8	33	11	22	18	9.666	3.899	43.025
s_1_1_SMACv1.0_contig 594	826	149	69	80	18	322.833	30.301	11	11	49	40	41	35	15.259	7.667	38.862
s_1_1_SMACv1.0_contig 595	520	38	23	15	7	322.143	25.25	4	4	14	1	11	15	7.085	3.095	38.846
s_1_1_SMACv1.0_contig 596	742	145	81	64	29	325.345	33.784	5	5	38	38	49	28	16.407	5.15	38.275
s_1_1_SMACv1.0_contig 597	652	63	33	30	7	338.857	27.694	6	6	23	13	17	14	7.485	3.001	31.135
s_1_1_SMACv1.0_contig 598	671	121	59	62	16	327.688	31.982	6	6	49	28	24	23	13.112	3.931	47.541
s_1_1_SMACv1.0_contig 599	614	106	54	52	12	337.917	23.51	9	9	42	21	23	22	12.803	5.035	37.459
s_1_1_SMACv1.0_contig 600	564	63	22	41	5	349.8	23.752	3	3	25	20	18	21	8.232	4.462	38.475
s_1_1_SMACv1.0_contig 601	812	77	47	30	16	340.688	24.705	4	4	18	18	20	17	7.894	3.297	39.409
s_1_1_SMACv1.0_contig 602	679	136	60	76	17	339	27.6	17	17	37	29	35	28	15.445	6.836	37.408
s_1_1_SMACv1.0_contig 603	661	65	39	26	14	328.571	23.271	4	4	16	13	22	15	8.194	3.284	33.888
s_1_1_SMACv1.0_contig 604	519	47	20	27	6	328.833	47.607	3	3	9	19	12	16	6.954	3.841	36.031
s_1_1_SMACv1.0_contig 605	502	28	15	13	4	317	39.421	3	3	7	3	14	11	6.606	2.341	31.873
s_1_1_SMACv1.0_contig 606	842	150	71	79	36	326.444	35.234	12	12	27	24	53	30	16.662	6.8	39.311
s_1_1_SMACv1.0_contig 607	1306	240	124	116	53	336.755	29.369	13	13	70	36	84	31	15.31	5.624	39.893
s_1_1_SMACv1.0_contig 608	966	88	48	40	9	323.778	28.421	6	6	25	30	29	16	7.347	2.74	35.404
s_1_1_SMACv1.0_contig 609	993	117	63	54	20	335.3	16.835	22	22	8	25	36	22	10.068	4.727	39.98
s_1_1_SMACv1.0_contig 610	626	95	46	49	12	330.333	20.328	9	9	44	7	27	19	12.982	3.989	35.783
s_1_1_SMACv1.0_contig 611	1269	235	121	114	51	330.196	28.536	10	10	66	44	79	31	14.697	6.356	48.148
s_1_1_SMACv1.0_contig 612	955	116	49	67	19	333.316	33.26	12	12	24	24	38	26	10.907	5.745	35.707
s_1_1_SMACv1.0_contig 613	773	78	38	40	18	330.167	34.194	6	6	22	7	31	17	8.776	3.834	37.128
s_1_1_SMACv1.0_contig 614	621	63	25	38	5	344.8	28.896	4	4	24	21	16	18	7.143	3.263	38.486
s_1_1_SMACv1.0_contig 615	535	67	33	34	6	344	26.23	5	5	33	12	20	19	9.933	4.098	41.121
s_1_1_SMACv1.0_contig 616	545	24	12	12	4	322	28.732	3	3	3	5	8	10	5.13	1.965	34.679
s_1_1_SMACv1.0_contig 617	648	69	40	29	9	327.222	12.994	7	7	29	6	15	16	9.142	2.665	33.333
s_1_1_SMACv1.0_contig 618	590	30	17	13	3	363.333	6.128	2	2	11	6	13	10	5.358	1.944	35.593
s_1_1_SMACv1.0_contig 619	594	25	8	17	3	314	29.223	2	2	3	9	11	10	5.03	1.748	30.976
s_1_1_SMACv1.0_contig 620	576	57	24	33	7	335.714	16.516	3	3	22	14	15	16	7.747	3.667	39.236
s_1_1_SMACv1.0_contig 621	846	112	59	53	19	333.421	27.622	9	9	18	30	40	20	12.268	4.416	42.908
s_1_1_SMACv1.0_contig 622	638	63	31	32	9	341.556	26.899	3	3	14	25	16	18	7.588	3.64	38.401
s_1_1_SMACv1.0_contig 623	523	77	40	37	11	318.364	26.739	6	6	19	21	20	23	12.273	4.961	40.535
s_1_1_SMACv1.0_contig 624	618	66	28	38	13	321.846	26.981	5	5	15	11	25	19	10.443	4.7	32.848
s_1_1_SMACv1.0_contig 625	538	45	22	23	5	341	42.445	5	5	14	11	12	12	6.708	2.19	40.706
s_1_1_SMACv1.0_contig 626	524	82	42	40	12	333.167	18.632	5	5	33	14	22	23	13.015	5.404	34.733
s_1_1_SMACv1.0_contig 627	738	210	117	93	25	328.88	30.546	22	22	61	53	57	37	22.869	7.725	42.954
s_1_1_SMACv1.0_contig 628	1411	448	217	231	105	333.743	27.807	23	23	112	74	157	59	26.355	11.959	47.909
s_1_1_SMACv1.0_contig 629	797	73	33	40	13	344.692	26.56	7	7	9	24	24	17	7.69	3.775	43.664
s_1_1_SMACv1.0_contig 630	1010	82	52	30	8	340.5	21.184	4	4	14	39	19	15	7.088	2.845	33.366
s_1_1_SMACv1.0_contig 631	1341	269	133	136	51	334.353	22.991	26	26	41	68	87	43	17.291	7.959	38.553
s_1_1_SMACv1.0_contig 632	565	53	19	34	6	338.667	20.862	6	6	8	20	16	14	7.938	2.528	35.221
s_1_1_SMACv1.0_contig 633	730	87	49	38	12	327	33.553	5	5	26	24	24	17	9.562	3.98	38.356
s_1_1_SMACv1.0_contig 634	760	94	54	40	23	328.087	33.959	3	3	18	24	39	17	10.338	4.017	36.447
s_1_1_SMACv1.0_contig 635	1155	91	40	51	21	331.952	30.469	4	4	20	16	36	20	7.625	3.735	33.074
s_1_1_SMACv1.0_contig 636	648	95	45	50	11	319.273	25.129	7	7	44	15	27	22	11.068	4.82	33.333
s_1_1_SMACv1.0_contig 637	667	87	45	42	10	327.6	18.57	15	15	16	17	20	24	11.576	5.737	35.232
s_1_1_SMACv1.0_contig 638	1605	161	81	80	35	334.6	33.679	16	16	39	19	58	20	8.531	3.524	39.003
s_1_1_SMACv1.0_contig 639	1293	189	90	99	34	333.235	31.476	21	21	43	31	58	23	12.942	3.973	38.206
s_1_1_SMACv1.0_contig 640	1101	183	100	83	30	323.633	32.862	25	25	41	29	58	35	14.052	7.533	37.875
s_1_1_SMACv1.0_contig 641	614	91	37	54	12	335	23.833	8	8	16	33	25	23	12.275	5.024	47.72
s_1_1_SMACv1.0_contig 642	531	36	20	16	2	336	17	2	2	20	7	8	14	5.324	2.525	29.944
s_1_1_SMACv1.0_contig 643	643	65	26	39	7	307.571	34.62	10	10	18	11	14	19	8.776	4.101	33.437
s_1_1_SMACv1.0_contig 644	697	75	42	33	10	333.3	19.905	10	10	21	12	23	20	9.088	3.608	36.872
s_1_1_SMACv1.0_contig 645	964	105	47	58	23	338.565	28.244	7	7	26	19	49	18	8.975	3.928	39.004
s_1_1_SMACv1.0_contig 646	1180	131	62	69	19	337.368	21.037	12	12	43	25	35	19	8.908	3.602	37.797
s_1_1_SMACv1.0_contig 647	935	116	59	57	20	330.85	21.341	12	12	21	30	39	19	10.407	3.396	43.85
s_1_1_SMACv1.0_contig 648	510	70	27	43	8	335.25	14.21	4	4	30	15	13	21	10.045	4.281	47.843
s_1_1_SMACv1.0_contig 649	655	128	49	79	21	339.905	21.998	4	4	42	33	42	30	15.171	6.806	44.275
s_1_1_SMACv1.0_contig 650	979	157	72	85	41	333.415	25.978	14	14	24	22	56	30	14.688	7.887	40.245
s_1_1_SMACv1.0_contig 651	1089	160	76	84	28	331.75	28.212	11	11	40	37	60	22	10.963	4.272	55.372
s_1_1_SMACv1.0_contig 652	995	158	80	78	33	332.212	26.949	12	12	40	25	52	25	13.839	5.132	36.784
s_1_1_SMACv1.0_contig 653	692	66	29	37	11	317.545	27.701	2	2	18	22	19	15	7.152	3.16	30.491
s_1_1_SMACv1.0_contig 654	1085	92	48	44	16	331.188	26.01	10	10	10	28	33	18	7.813	3.119	36.406
s_1_1_SMACv1.0_contig 655	823	85	40	45	12	335.917	24.309	10	10	21	17	29	20	8.888	5.168	31.349
s_1_1_SMACv1.0_contig 656	1411	123	66	57	25	332.72	32.163	8	8	23	30	42	14	7.694	2.701	36.712
s_1_1_SMACv1.0_contig 657	500	67	25	42	5	352.2	29.923	6	6	25	19	13	18	10.522	3.539	32.6
s_1_1_SMACv1.0_contig 658	503	63	33	30	8	304.875	32.575	2	2	23	19	21	20	10.827	4.979	27.833
s_1_1_SMACv1.0_contig 659	552	56	24	32	8	337	15.354	5	5	17	11	23	16	9.467	3.449	40.58
s_1_1_SMACv1.0_contig 660	543	111	50	61	13	319.462	29.264	5	5	39	34	35	25	15.313	5.034	41.068
s_1_1_SMACv1.0_contig 661	889	147	66	81	28	330	24.717	7	7	45	29	59	23	14.253	4.119	39.033
s_1_1_SMACv1.0_contig 662	933	94	56	38	18	339.944	27.43	5	5	18	27	29	22	9.021	4.287	37.299
s_1_1_SMACv1.0_contig 663	715	53	25	28	10	336.9	26.872	3	3	18	8	18	13	6.432	2.292	38.881
s_1_1_SMACv1.0_contig 664	863	64	35	29	11	311.455	29.855	8	8	14	10	21	12	6.736	2.344	36.269
s_1_1_SMACv1.0_contig 665	1209	112	56	56	25	322.72	32.664	9	9	28	12	50	32	8.79	6.137	36.973
s_1_1_SMACv1.0_contig 666	526	36	16	20	9	327.667	28.967	3	3	9	2	12	15	6.667	3.597	34.411
s_1_1_SMACv1.0_contig 667	597	57	32	25	11	342.636	29.249	5	5	7	17	17	18	7.829	3.773	37.688
s_1_1_SMACv1.0_contig 668	977	97	52	45	14	333.214	30.683	7	7	24	29	30	17	8.347	3.133	37.973
s_1_1_SMACv1.0_contig 669	696	127	69	58	19	318.474	30.429	2	2	57	27	33	25	13.777	5.426	52.011
s_1_1_SMACv1.0_contig 670	575	103	44	59	11	333.636	20.286	10	10	35	25	28	25	12.65	5.174	37.913
s_1_1_SMACv1.0_contig 671	757	87	38	49	10	353.6	22.335	5	5	24	31	22	23	8.478	4.89	39.894
s_1_1_SMACv1.0_contig 672	1347	202	95	107	43	332.86	23.877	12	12	43	41	79	27	13.395	5.253	33.63
s_1_1_SMACv1.0_contig 673	795	60	33	27	9	329	37.315	4	4	12	19	21	11	7.151	2.472	36.855
s_1_1_SMACv1.0_contig 674	806	77	39	38	12	313.583	41.438	5	5	12	29	20	23	8.39	4.956	38.586
s_1_1_SMACv1.0_contig 675	582	45	20	25	11	325	32.305	2	2	14	5	18	14	7.174	3.078	37.457
s_1_1_SMACv1.0_contig 676	780	84	32	52	13	326.615	32.707	9	9	24	16	33	20	8.628	4.089	33.974
s_1_1_SMACv1.0_contig 677	1421	256	135	121	68	339.074	29.281	14	14	61	28	95	35	15.716	7.696	37.016
s_1_1_SMACv1.0_contig 678	852	149	62	87	15	332.933	31.011	14	14	55	31	41	35	13.399	7.953	36.15
s_1_1_SMACv1.0_contig 679	498	96	63	33	19	326.316	26.262	2	2	38	15	35	28	14.857	6.354	38.554
s_1_1_SMACv1.0_contig 680	769	70	41	29	16	341.438	20.591	5	5	11	14	32	19	9.382	4.294	39.142
s_1_1_SMACv1.0_contig 681	629	81	50	31	8	325.5	12.247	10	10	22	20	21	21	11.165	4.601	39.269
s_1_1_SMACv1.0_contig 682	598	66	32	34	8	347.125	20.233	7	7	20	12	23	23	10.124	5.124	30.268
s_1_1_SMACv1.0_contig 683	531	75	34	41	5	315.4	21.181	6	6	19	32	10	23	10.26	5.839	35.782
s_1_1_SMACv1.0_contig 684	690	156	81	75	12	331.917	38.569	19	19	51	41	26	32	16.774	6.593	38.696
s_1_1_SMACv1.0_contig 685	954	107	66	41	15	332.2	23.464	14	14	34	13	31	23	9.186	4.936	33.019
s_1_1_SMACv1.0_contig 686	549	56	22	34	3	334	16.573	7	7	17	19	20	18	7.255	3.859	36.066
s_1_1_SMACv1.0_contig 687	537	101	45	56	10	313.6	36.669	5	5	44	27	22	32	13.847	6.648	33.892
s_1_1_SMACv1.0_contig 688	1069	103	55	48	31	333.871	31.163	4	4	9	21	47	22	9.11	4.476	36.296
s_1_1_SMACv1.0_contig 689	620	58	30	28	7	335.571	16.543	9	9	14	10	15	17	7.639	4.097	36.774
s_1_1_SMACv1.0_contig 690	573	34	17	17	5	316	7.694	4	4	10	6	7	10	5.182	2.23	34.206
s_1_1_SMACv1.0_contig 691	1520	150	78	72	36	340.028	23.435	14	14	25	24	50	23	8.645	4.174	38.158
s_1_1_SMACv1.0_contig 692	1125	173	84	89	23	325.913	28.876	22	22	52	29	51	24	12.287	5.036	33.778
s_1_1_SMACv1.0_contig 693	521	48	30	18	4	319	25.485	3	3	24	8	19	13	7.695	2.405	33.397
s_1_1_SMACv1.0_contig 694	1054	213	94	119	34	329.294	26.933	13	13	77	36	58	38	16.188	7.068	36.812
s_1_1_SMACv1.0_contig 695	685	82	40	42	15	332.733	30.543	7	7	16	20	23	23	9.486	4.673	34.599
s_1_1_SMACv1.0_contig 696	1075	102	51	51	19	335.368	23.421	7	7	37	10	43	18	7.788	4.076	38.512
s_1_1_SMACv1.0_contig 697	742	61	33	28	11	331.818	33.542	6	6	15	11	19	19	8.044	4.104	38.14
s_1_1_SMACv1.0_contig 698	624	42	18	24	7	343.143	14.357	4	4	9	10	12	13	6.288	2.676	32.372
s_1_1_SMACv1.0_contig 699	671	45	24	21	8	328	23.119	5	5	7	10	14	12	6.489	2.064	33.383
s_1_1_SMACv1.0_contig 700	724	109	53	56	15	324.2	31.19	3	3	54	17	31	26	10.243	4.806	45.166
s_1_1_SMACv1.0_contig 701	654	67	35	32	7	325.571	6.366	6	6	28	12	17	17	8.448	4.063	38.226
s_1_1_SMACv1.0_contig 702	649	41	24	17	8	331.75	12.696	3	3	8	9	16	14	6.749	2.832	34.977
s_1_1_SMACv1.0_contig 703	770	111	50	61	21	332.095	21.419	10	10	20	27	35	29	13.021	6.411	32.597
s_1_1_SMACv1.0_contig 704	760	107	57	50	14	347.786	23.306	11	11	46	10	39	19	11.025	4.171	38.684
s_1_1_SMACv1.0_contig 705	745	97	45	52	13	317.615	33.87	10	10	32	17	26	28	10.915	5.676	33.02
s_1_1_SMACv1.0_contig 706	621	88	34	54	7	314.143	41.153	6	6	37	23	29	21	11.623	4.026	40.741
s_1_1_SMACv1.0_contig 707	595	86	40	46	14	327.429	24.965	9	9	27	12	23	19	11.103	3.697	34.454
s_1_1_SMACv1.0_contig 708	1360	256	137	119	53	338.585	32.701	16	16	76	37	96	30	15.649	6.321	38.088
s_1_1_SMACv1.0_contig 709	606	73	37	36	9	320.333	28.016	6	6	20	21	21	23	9.436	4.81	37.624
s_1_1_SMACv1.0_contig 710	689	163	79	84	26	338.538	29.119	14	14	39	43	54	31	16.403	7.402	43.687
s_1_1_SMACv1.0_contig 711	751	98	33	65	15	343.133	29.602	7	7	18	35	30	20	10.525	4.302	33.555
s_1_1_SMACv1.0_contig 712	1041	159	83	76	31	331.29	24.543	9	9	26	52	49	27	12.3	5.852	39.289
s_1_1_SMACv1.0_contig 713	518	89	38	51	13	322.923	33.163	4	4	35	19	22	20	13.51	4.602	37.645
s_1_1_SMACv1.0_contig 714	1020	188	93	95	43	332.605	27.322	14	14	46	27	67	26	14.693	5.624	37.157
s_1_1_SMACv1.0_contig 715	727	82	47	35	11	325.545	20.308	6	6	30	13	20	20	10.175	4.514	38.927
s_1_1_SMACv1.0_contig 716	527	58	31	27	11	334.909	31.445	3	3	13	16	16	17	9.068	3.673	47.818
s_1_1_SMACv1.0_contig 717	625	59	26	33	6	326.167	33.434	9	9	22	6	14	18	8.283	4.334	35.84
s_1_1_SMACv1.0_contig 718	725	107	53	54	13	326.462	33.468	4	4	37	34	59	37	10.662	7.657	35.862
s_1_1_SMACv1.0_contig 719	693	84	48	36	13	336.231	32.364	14	14	15	14	30	24	10.584	5.029	33.045
s_1_1_SMACv1.0_contig 720	1145	121	54	67	23	332.957	25.605	11	11	32	20	39	16	8.846	3.206	39.214
s_1_1_SMACv1.0_contig 721	522	52	25	27	4	308.25	35.23	4	4	24	10	19	14	7.425	3.754	31.609
s_1_1_SMACv1.0_contig 722	607	45	26	19	4	339.25	33.402	5	5	20	3	11	13	7.939	2.641	34.267
s_1_1_SMACv1.0_contig 723	711	70	38	32	19	329.789	25.331	7	7	9	8	29	19	8.685	3.553	40.366
s_1_1_SMACv1.0_contig 724	1277	159	70	89	31	343.548	26.147	17	17	44	19	52	18	9.884	3.799	46.907
s_1_1_SMACv1.0_contig 725	574	35	11	24	6	338.333	29.25	3	3	9	8	13	13	5.108	2.882	37.979
s_1_1_SMACv1.0_contig 726	1050	113	57	56	22	328.318	26.899	8	8	31	19	43	25	8.806	4.411	42.762
s_1_1_SMACv1.0_contig 727	888	70	45	25	17	329.118	30.536	2	2	20	10	23	15	6.631	3.505	39.189
s_1_1_SMACv1.0_contig 728	524	44	23	21	5	319.4	19.571	3	3	14	13	11	12	6.83	2.5	38.168
s_1_1_SMACv1.0_contig 729	653	77	47	30	5	307.2	40.41	6	6	45	9	15	19	9.715	3.878	37.366
s_1_1_SMACv1.0_contig 730	973	149	72	77	19	343.263	26.38	13	13	60	21	50	24	11.428	5.223	36.485
s_1_1_SMACv1.0_contig 731	543	66	22	44	5	319.4	22.464	2	2	14	38	15	16	8.109	3.814	38.858
s_1_1_SMACv1.0_contig 732	628	101	56	45	8	341.875	23.143	6	6	57	15	23	22	11.291	4.849	36.306
s_1_1_SMACv1.0_contig 733	502	80	41	39	9	341.667	15.427	6	6	36	14	20	24	12.608	5.578	37.251
s_1_1_SMACv1.0_contig 734	813	77	47	30	8	318.625	11.672	10	10	28	13	24	16	7.213	3.398	31.611
s_1_1_SMACv1.0_contig 735	754	80	51	29	15	329.667	19.905	5	5	22	17	25	15	9.227	2.39	40.981
s_1_1_SMACv1.0_contig 736	998	79	42	37	15	339	30.522	5	5	20	14	29	19	8.131	3.498	36.673
s_1_1_SMACv1.0_contig 737	753	56	25	31	10	361.5	27.904	3	3	23	7	19	12	6.279	2.68	33.865
s_1_1_SMACv1.0_contig 738	647	94	46	48	15	325.467	21.981	13	13	22	16	32	26	11.852	6.141	37.403
s_1_1_SMACv1.0_contig 739	552	58	29	29	8	308.375	16.477	7	7	14	14	16	14	8.449	3.787	38.949
s_1_1_SMACv1.0_contig 740	567	68	41	27	7	325.714	30.377	4	4	21	23	20	18	9.007	3.789	42.857
s_1_1_SMACv1.0_contig 741	594	104	70	34	10	329.8	31.118	5	5	42	32	25	26	13.074	5.509	36.027
s_1_1_SMACv1.0_contig 742	845	67	42	25	4	335.5	14.169	7	7	27	16	11	13	6.644	2.85	35.503
s_1_1_SMACv1.0_contig 743	584	74	36	38	5	329.8	34.799	6	6	22	29	17	18	9.899	3.784	39.555
s_1_1_SMACv1.0_contig 744	509	41	26	15	5	332	17.006	3	3	23	2	11	13	7.081	2.752	39.686
s_1_1_SMACv1.0_contig 745	691	104	40	64	15	330.667	29.284	6	6	38	22	34	25	12.682	5.471	38.061
s_1_1_SMACv1.0_contig 746	655	76	33	43	9	330.333	16.479	10	10	12	23	17	23	10.916	5.172	32.977
s_1_1_SMACv1.0_contig 747	720	70	33	37	13	335.385	26.572	5	5	22	11	24	19	8.361	3.337	40.833
s_1_1_SMACv1.0_contig 748	1266	175	88	87	40	334.375	27.286	18	18	38	20	59	26	11.844	6.434	37.046
s_1_1_SMACv1.0_contig 749	832	67	34	33	10	339.4	23.419	7	7	22	11	18	13	7.226	2.829	36.899
s_1_1_SMACv1.0_contig 750	496	67	34	33	4	325.25	34.73	7	7	7	36	13	22	9.103	5.65	50.403
s_1_1_SMACv1.0_contig 751	952	134	66	68	19	338.105	26.35	15	15	37	24	44	21	11.98	4.026	38.445
s_1_1_SMACv1.0_contig 752	738	78	36	42	15	324.933	24.065	5	5	14	23	18	16	9.351	2.913	38.076
s_1_1_SMACv1.0_contig 753	987	101	47	54	19	327.105	33.818	13	13	19	18	41	18	8.834	3.457	41.54
s_1_1_SMACv1.0_contig 754	523	33	10	23	3	315.667	18.696	2	2	16	5	5	14	6.317	2.682	32.887
s_1_1_SMACv1.0_contig 755	1261	102	47	55	12	334.833	30.46	13	13	32	17	22	14	7.01	2.211	37.193
s_1_1_SMACv1.0_contig 756	910	131	73	58	24	340.083	18.764	14	14	30	24	43	20	11.702	4.149	39.56
s_1_1_SMACv1.0_contig 757	534	60	32	28	7	322.286	17.4	11	11	12	12	17	25	9.783	6.305	40.449
s_1_1_SMACv1.0_contig 758	646	60	35	25	12	322.583	27.164	6	6	5	17	23	17	8.498	3.814	38.545
s_1_1_SMACv1.0_contig 759	1045	83	49	34	15	333.867	29.001	5	5	21	20	27	14	6.583	3.521	38.66
s_1_1_SMACv1.0_contig 760	1253	207	101	106	34	337.441	22.841	23	23	62	27	63	29	13.74	5.272	37.749
s_1_1_SMACv1.0_contig 761	988	136	61	75	20	334.3	28.606	12	12	54	16	39	20	11.134	5.298	34.312
s_1_1_SMACv1.0_contig 762	788	99	55	44	17	326.882	23.926	9	9	31	14	34	21	11.288	4.087	38.579
s_1_1_SMACv1.0_contig 763	568	50	19	31	2	336.5	1.5	8	8	19	11	13	12	6.357	2.465	35.035
s_1_1_SMACv1.0_contig 764	841	117	50	67	22	328.636	19.408	9	9	22	33	34	22	11.168	4.985	46.73
s_1_1_SMACv1.0_contig 765	530	52	28	24	5	338.4	28.5	5	5	17	15	8	13	7.455	2.954	32.642
s_1_1_SMACv1.0_contig 766	586	54	29	25	4	342.5	13.162	8	8	7	23	11	12	7.66	2.739	39.078
s_1_1_SMACv1.0_contig 767	550	56	27	29	7	337.714	28.759	3	3	14	20	21	19	7.991	4.327	38.364
s_1_1_SMACv1.0_contig 768	555	65	35	30	9	332.889	28.053	8	8	13	18	22	19	10.061	4.222	31.171
s_1_1_SMACv1.0_contig 769	1137	151	70	81	25	333.68	20.189	7	7	44	37	49	24	10.543	4.459	39.754
s_1_1_SMACv1.0_contig 770	699	152	84	68	25	331.48	23.962	6	6	30	59	51	27	13.484	6.62	67.811
s_1_1_SMACv1.0_contig 771	620	113	59	54	20	332.15	33.209	10	10	32	17	34	26	14.963	6.313	41.29
s_1_1_SMACv1.0_contig 772	958	102	51	51	19	322.053	28.272	8	8	28	19	29	24	8.087	4.947	38.622
s_1_1_SMACv1.0_contig 773	543	55	30	25	4	331.75	22.587	2	2	31	11	17	12	7.575	2.364	29.282
s_1_1_SMACv1.0_contig 774	627	93	40	53	6	324.5	29.29	7	7	44	22	27	27	11.437	5.676	35.885
s_1_1_SMACv1.0_contig 775	567	71	40	31	7	335.429	17.045	8	8	28	13	25	21	9.215	4.068	41.446
s_1_1_SMACv1.0_contig 776	720	154	73	81	14	326.786	24.187	12	12	64	36	35	36	15.947	8.881	38.056
s_1_1_SMACv1.0_contig 777	944	161	79	82	29	333.724	31.042	12	12	39	39	50	26	13.984	6.261	48.411
s_1_1_SMACv1.0_contig 778	827	99	51	48	12	328.417	25.96	5	5	39	20	32	22	10.538	5.098	34.825
s_1_1_SMACv1.0_contig 779	682	43	27	16	7	316.571	24.171	5	5	12	6	15	17	5.4	4.298	43.548
s_1_1_SMACv1.0_contig 780	729	55	20	35	8	336.625	27.111	7	7	23	2	17	11	6.015	2.275	36.763
s_1_1_SMACv1.0_contig 781	687	122	61	61	11	327.364	30.749	9	9	45	36	39	26	14.559	4.977	35.662
s_1_1_SMACv1.0_contig 782	691	113	57	56	17	338.824	23.101	7	7	44	19	30	23	13.252	5.259	34.298
s_1_1_SMACv1.0_contig 783	790	54	25	29	12	310.917	20.63	3	3	11	12	20	17	6.324	3.429	33.544
s_1_1_SMACv1.0_contig 784	997	190	93	97	37	328.541	29.081	19	19	42	33	61	33	16.967	7.676	36.911
s_1_1_SMACv1.0_contig 785	1150	93	45	48	27	333.333	22.732	7	7	20	4	35	19	7.778	3.722	37.13
s_1_1_SMACv1.0_contig 786	1046	81	30	51	16	338.25	34.515	6	6	18	16	25	15	7.024	2.442	34.417
s_1_1_SMACv1.0_contig 787	958	182	88	94	25	322.12	25.111	12	12	62	42	42	35	15.053	7.52	38.727
s_1_1_SMACv1.0_contig 788	799	94	49	45	18	329.111	27.604	10	10	23	14	32	20	10.191	3.808	38.673
s_1_1_SMACv1.0_contig 789	828	107	53	54	16	332.5	31.355	11	11	21	30	29	19	10.681	3.92	40.7
s_1_1_SMACv1.0_contig 790	679	48	22	26	9	316.222	37.617	1	1	23	4	17	13	6.08	2.799	34.462
s_1_1_SMACv1.0_contig 791	600	74	39	35	8	342.5	29.703	4	4	29	18	23	20	10.007	4.104	41.167
s_1_1_SMACv1.0_contig 792	683	127	63	64	14	333.429	25.823	16	16	42	19	46	33	15.906	8.714	41.874
s_1_1_SMACv1.0_contig 793	506	91	33	58	11	335.364	27.437	6	6	38	19	26	28	14.073	6.407	34.19
s_1_1_SMACv1.0_contig 794	826	134	75	59	22	344.5	16.342	5	5	39	39	43	23	12.144	4.983	48.184
s_1_1_SMACv1.0_contig 795	551	34	15	19	9	334.222	32.465	3	3	7	2	12	9	6.136	2.162	35.935
s_1_1_SMACv1.0_contig 796	877	77	40	37	19	339.737	25.629	7	7	14	10	31	17	7.953	3.76	39.225
s_1_1_SMACv1.0_contig 797	682	117	67	50	16	334.375	21.903	8	8	43	26	30	26	13.054	5.649	39.589
s_1_1_SMACv1.0_contig 798	504	36	17	19	2	334	24	3	3	12	13	13	11	5.833	2.687	29.96
s_1_1_SMACv1.0_contig 799	533	45	20	25	5	315	29.155	2	2	13	17	15	14	5.897	3.329	37.336
s_1_1_SMACv1.0_contig 800	516	64	39	25	6	349.667	19.491	7	7	16	22	12	20	10.508	3.848	34.109
s_1_1_SMACv1.0_contig 801	694	130	80	50	11	328.182	15.596	11	11	55	27	33	26	14.824	4.972	37.464
s_1_1_SMACv1.0_contig 802	861	113	57	56	18	348.278	20.085	11	11	34	19	35	22	10.955	4.106	34.379
s_1_1_SMACv1.0_contig 803	606	63	28	35	13	325.846	25.726	4	4	13	16	23	15	8.559	3.272	47.03
s_1_1_SMACv1.0_contig 804	563	75	41	34	2	298	37	12	12	31	16	20	17	9.053	3.109	37.655
s_1_1_SMACv1.0_contig 805	1262	186	91	95	40	334.225	22.359	15	15	49	22	73	27	12.352	6.596	42.789
s_1_1_SMACv1.0_contig 806	1022	82	41	41	15	324.4	24.453	9	9	12	22	28	15	7.028	2.789	38.943
s_1_1_SMACv1.0_contig 807	1004	89	46	43	18	335.944	27.067	10	10	18	13	31	16	7.538	3.022	38.147
s_1_1_SMACv1.0_contig 808	665	83	41	42	9	326.444	32.755	10	10	17	25	21	21	11.195	5.38	40.902
s_1_1_SMACv1.0_contig 809	787	83	37	46	14	331.429	35.685	6	6	6	36	26	14	8.222	2.988	41.931
s_1_1_SMACv1.0_contig 810	582	58	22	36	7	330.143	43.92	6	6	13	17	18	17	8.656	3.239	39.691
s_1_1_SMACv1.0_contig 811	550	86	30	56	11	340.636	36.545	4	4	27	28	23	26	12.731	5.843	33.455
s_1_1_SMACv1.0_contig 812	516	78	45	33	0			5	5	53	13	19	16	7.55	3.468	72.674
s_1_1_SMACv1.0_contig 813	795	106	57	49	16	332.812	28.599	7	7	32	28	29	16	10.497	2.499	44.78
s_1_1_SMACv1.0_contig 814	1359	190	92	98	32	338.344	26.208	20	20	45	41	54	27	11.909	4.997	35.835
s_1_1_SMACv1.0_contig 815	908	105	45	60	14	349.286	16.499	8	8	39	19	35	19	9.2	3.819	33.26
s_1_1_SMACv1.0_contig 816	564	63	31	32	5	336.6	26.912	5	5	26	17	11	17	8.589	3.469	43.617
s_1_1_SMACv1.0_contig 817	771	79	40	39	10	329.4	26.496	8	8	23	19	18	15	8.031	3.114	34.112
s_1_1_SMACv1.0_contig 818	982	133	72	61	23	322	28.413	7	7	32	39	39	22	10.175	4.544	42.566
s_1_1_SMACv1.0_contig 819	892	85	39	46	17	322.882	24.063	9	9	10	22	34	16	8.312	3.597	43.274
s_1_1_SMACv1.0_contig 820	870	108	54	54	16	328.625	33.969	4	4	45	23	36	17	9.206	3.496	40.575
s_1_1_SMACv1.0_contig 821	796	176	83	93	33	331	23.943	12	12	57	28	55	33	16.389	7.06	44.347
s_1_1_SMACv1.0_contig 822	605	85	51	34	10	342.5	27.562	8	8	40	7	24	23	12.081	4.728	37.19
s_1_1_SMACv1.0_contig 823	1282	127	69	58	29	336.586	23.392	9	9	15	30	51	18	9.597	4.134	36.739
s_1_1_SMACv1.0_contig 824	580	87	47	40	13	317.308	24.637	6	6	30	18	30	29	12.245	6.622	37.241
s_1_1_SMACv1.0_contig 825	669	63	40	23	11	338.636	19.415	5	5	23	7	27	14	8.541	3.132	32.885
s_1_1_SMACv1.0_contig 826	923	137	66	71	25	339.52	33.165	13	13	33	27	52	20	12.202	4.72	38.787
s_1_1_SMACv1.0_contig 827	666	115	60	55	19	329.632	22.387	14	14	31	16	36	25	14.68	6.318	36.486
s_1_1_SMACv1.0_contig 828	539	52	36	16	6	325.667	38.806	3	3	12	20	12	20	8.568	4.58	30.983
s_1_1_SMACv1.0_contig 829	823	87	46	41	17	337.294	15.153	11	11	20	8	26	23	10.329	5.243	31.592
s_1_1_SMACv1.0_contig 830	774	62	30	32	9	335.889	24.264	6	6	20	12	16	12	6.571	2.163	33.85
s_1_1_SMACv1.0_contig 831	957	140	69	71	29	342.034	37.318	15	15	28	20	40	30	12.791	7.435	37.2
s_1_1_SMACv1.0_contig 832	625	105	55	50	13	336.154	42.184	12	12	25	29	28	30	14.083	5.76	36
s_1_1_SMACv1.0_contig 833	664	62	33	29	8	323.75	14.998	8	8	13	16	20	14	7.455	3.414	33.133
s_1_1_SMACv1.0_contig 834	521	64	25	39	12	336.25	27.971	4	4	23	9	27	23	10.063	4.921	38.772
s_1_1_SMACv1.0_contig 835	747	65	33	32	8	340.75	18.267	8	8	21	12	22	13	7.206	2.759	30.12
s_1_1_SMACv1.0_contig 836	638	49	20	29	5	325.4	27.84	6	6	14	13	9	11	6.368	2.436	37.774
s_1_1_SMACv1.0_contig 837	635	108	53	55	6	356.333	21.476	5	5	57	29	16	25	11.282	5.358	35.276
s_1_1_SMACv1.0_contig 838	632	67	36	31	5	340.4	18.249	8	8	26	14	24	15	8.81	3.259	35.601
s_1_1_SMACv1.0_contig 839	758	68	34	34	12	327.583	34.299	7	7	19	9	26	18	7.79	3.641	35.752
s_1_1_SMACv1.0_contig 840	613	62	33	29	7	328.571	21.947	4	4	23	16	17	16	8.602	3.264	38.336
s_1_1_SMACv1.0_contig 841	1070	186	93	93	32	331.094	31.064	12	12	64	28	59	32	14.513	6.152	39.065
s_1_1_SMACv1.0_contig 842	764	47	28	19	7	327.286	24.517	3	3	14	12	11	12	5.39	2.205	34.162
s_1_1_SMACv1.0_contig 843	676	99	56	43	12	335.167	28.545	8	8	32	25	18	24	11.013	5.73	40.68
s_1_1_SMACv1.0_contig 844	1080	162	71	91	28	329.607	37.086	7	7	65	22	56	25	12.203	6.103	36.481
s_1_1_SMACv1.0_contig 845	610	85	48	37	16	325.312	31.394	1	1	36	13	33	22	11.211	4.328	37.377
s_1_1_SMACv1.0_contig 846	833	96	50	46	16	333.25	20.562	10	10	22	21	25	24	9.593	6.277	37.215
s_1_1_SMACv1.0_contig 847	1097	180	80	100	34	330.471	34.984	11	11	46	40	60	27	13.847	5.064	34.64
s_1_1_SMACv1.0_contig 848	766	58	28	30	8	343.875	20.472	5	5	15	14	20	12	7.155	3.032	32.376
s_1_1_SMACv1.0_contig 849	702	53	31	22	8	349.25	19.156	7	7	9	10	16	17	8.288	3.931	33.903
s_1_1_SMACv1.0_contig 850	589	61	33	28	5	322.2	32.48	8	8	16	15	15	18	10.149	4.485	35.993
s_1_1_SMACv1.0_contig 851	853	79	34	45	19	336.684	25.052	8	8	15	9	29	15	8.613	3.293	39.39
s_1_1_SMACv1.0_contig 852	601	72	39	33	8	330	35.889	7	7	13	22	27	20	12.047	3.957	37.77
s_1_1_SMACv1.0_contig 853	879	70	36	34	11	321.909	23.873	7	7	18	15	20	13	6.369	2.394	38.225
s_1_1_SMACv1.0_contig 854	586	57	24	33	8	342.625	24.443	7	7	13	11	15	17	8.292	3.193	39.761
s_1_1_SMACv1.0_contig 855	573	86	39	47	10	335.1	37.716	7	7	28	23	26	21	11.351	3.929	31.588
s_1_1_SMACv1.0_contig 856	850	109	62	47	18	331	30.076	5	5	42	17	36	21	11.352	4.943	45.412
s_1_1_SMACv1.0_contig 857	737	71	37	34	14	342.214	31.453	4	4	20	13	23	15	8.038	2.778	41.113
s_1_1_SMACv1.0_contig 858	994	215	108	107	20	340.3	25.078	14	14	85	60	64	28	15.141	5.417	35.815
s_1_1_SMACv1.0_contig 859	1008	206	111	95	32	333.875	24.252	14	14	73	37	58	34	16.186	7.461	37.798
s_1_1_SMACv1.0_contig 860	1153	103	55	48	20	323.35	27.172	7	7	21	23	36	16	7.85	3.469	37.121
s_1_1_SMACv1.0_contig 861	586	58	35	23	8	327.125	16.198	5	5	18	14	14	15	7.367	3.281	36.689
s_1_1_SMACv1.0_contig 862	917	121	63	58	21	334.429	32.516	10	10	38	21	30	24	10.01	4.57	35.442
s_1_1_SMACv1.0_contig 863	568	56	37	19	5	346.4	23.652	7	7	13	18	11	14	7.944	2.744	30.458
s_1_1_SMACv1.0_contig 864	876	49	18	31	9	335.444	19.38	5	5	12	6	18	13	5.767	3.825	34.018
s_1_1_SMACv1.0_contig 865	1034	119	65	54	21	340.333	22.201	8	8	29	30	37	20	9.691	4.364	38.395
s_1_1_SMACv1.0_contig 866	631	76	34	42	14	334.929	21.168	6	6	16	18	28	23	10.41	4.756	30.745
s_1_1_SMACv1.0_contig 867	783	150	73	77	17	329.824	16.745	13	13	68	19	37	26	15.497	5.191	38.314
s_1_1_SMACv1.0_contig 868	602	44	18	26	5	338.2	19.135	3	3	14	11	11	15	6.894	2.952	41.362
s_1_1_SMACv1.0_contig 869	851	140	76	64	19	331.474	29.671	12	12	56	20	52	29	13.692	5.837	37.25
s_1_1_SMACv1.0_contig 870	866	169	79	90	24	326.167	30.872	14	14	35	56	47	25	15.061	4.562	37.182
s_1_1_SMACv1.0_contig 871	652	72	24	48	6	325	20.712	3	3	37	14	16	17	7.637	3.147	35.89
s_1_1_SMACv1.0_contig 872	616	50	30	20	12	328.667	25.154	5	5	6	9	18	16	7.429	3.914	37.825
s_1_1_SMACv1.0_contig 873	1374	182	92	90	26	333.615	20.264	14	14	57	44	44	23	9.939	4.246	40.539
s_1_1_SMACv1.0_contig 874	562	74	33	41	8	331.125	11.731	2	2	18	34	22	21	9.605	3.918	40.569
s_1_1_SMACv1.0_contig 875	608	28	15	13	4	290.5	37.646	5	5	4	5	10	12	4.405	2.886	32.237
s_1_1_SMACv1.0_contig 876	796	76	38	38	9	326.778	24.367	9	9	27	9	27	17	8.27	4.778	37.688
s_1_1_SMACv1.0_contig 877	591	81	35	46	7	327.143	36.736	9	9	31	15	25	26	12.325	5.999	32.657
s_1_1_SMACv1.0_contig 878	874	91	50	41	16	332.188	14.778	10	10	15	20	30	17	9.014	3.621	33.753
s_1_1_SMACv1.0_contig 879	1150	131	62	69	19	329.632	20.816	14	14	41	20	35	21	10.07	3.786	33.217
s_1_1_SMACv1.0_contig 880	892	105	51	54	17	346.765	22.145	9	9	30	22	38	20	9.382	3.888	33.408
s_1_1_SMACv1.0_contig 881	611	108	60	48	15	329.333	28.206	12	12	33	20	37	31	15.309	6.943	32.897
s_1_1_SMACv1.0_contig 882	685	65	35	30	13	332.846	18.965	6	6	15	10	20	20	9.188	4.25	36.642
s_1_1_SMACv1.0_contig 883	542	84	36	48	8	334.375	25.985	7	7	25	28	28	21	11.465	4.901	44.465
s_1_1_SMACv1.0_contig 884	504	51	36	15	7	317.429	29.403	3	3	7	24	13	17	9.149	3.745	37.103
s_1_1_SMACv1.0_contig 885	731	68	35	33	8	323.25	42.766	6	6	22	16	27	19	8.26	3.625	32.558
s_1_1_SMACv1.0_contig 886	792	273	160	113	28	329.5	29.74	21	21	100	74	73	50	21.324	12.444	53.914
s_1_1_SMACv1.0_contig 887	676	59	29	30	7	327.429	23.095	7	7	22	7	23	17	6.775	3.851	32.84
s_1_1_SMACv1.0_contig 888	513	44	20	24	7	341.143	19.91	5	5	13	7	12	14	7.515	3.341	31.774
s_1_1_SMACv1.0_contig 889	1101	96	33	63	15	325.333	20.415	10	10	31	13	33	16	7.096	3.162	38.692
s_1_1_SMACv1.0_contig 890	617	65	27	38	11	326.273	36.224	2	2	15	23	20	14	8.981	2.913	42.95
s_1_1_SMACv1.0_contig 891	1131	115	58	57	25	333.2	28.811	9	9	25	21	40	24	8.633	4.73	35.19
s_1_1_SMACv1.0_contig 892	541	66	33	33	10	331.8	22.71	4	4	22	14	23	17	8.933	4.279	48.614
s_1_1_SMACv1.0_contig 893	534	58	33	25	10	340.3	30.292	2	2	18	15	19	17	8.345	3.683	38.39
s_1_1_SMACv1.0_contig 894	788	95	46	49	13	346.692	24.036	10	10	30	17	25	18	9.633	4.179	33.249
s_1_1_SMACv1.0_contig 895	791	49	28	21	13	342.615	19.606	4	4	6	9	21	13	6.08	2.342	36.915
s_1_1_SMACv1.0_contig 896	710	69	29	40	13	323.154	26.766	4	4	22	13	19	16	7.654	2.887	40.141
s_1_1_SMACv1.0_contig 897	1017	164	70	94	33	337.182	29.757	17	17	46	12	56	29	15.548	6.237	35.202
s_1_1_SMACv1.0_contig 898	560	103	44	59	9	316.222	35.845	4	4	31	46	21	37	12.904	8.885	35.357
s_1_1_SMACv1.0_contig 899	1081	119	58	61	20	340.1	25.959	14	14	33	14	32	20	9.924	4.125	41.998
s_1_1_SMACv1.0_contig 900	701	67	35	32	14	344.786	23.788	3	3	22	9	27	16	7.601	2.838	38.374
s_1_1_SMACv1.0_contig 901	1094	157	77	80	25	340.04	40.172	19	19	40	22	53	27	13.21	5.229	33.272
s_1_1_SMACv1.0_contig 902	1280	137	69	68	27	322.37	34.745	12	12	38	19	40	20	8.88	3.477	38.125
s_1_1_SMACv1.0_contig 903	918	125	58	67	22	335.273	25.191	11	11	26	31	40	19	11.205	3.847	40.959
s_1_1_SMACv1.0_contig 904	1179	125	60	65	25	340.2	27.769	16	16	8	30	40	21	9.932	3.955	40.543
s_1_1_SMACv1.0_contig 905	825	63	35	28	10	331.7	30.919	9	9	13	12	19	14	6.348	3.252	37.091
s_1_1_SMACv1.0_contig 906	788	183	117	66	14	335.571	23.2	9	9	82	52	72	27	12.668	5.739	69.036
s_1_1_SMACv1.0_contig 907	697	84	37	47	13	334.846	26.059	9	9	23	16	27	23	10.102	5.565	35.438
s_1_1_SMACv1.0_contig 908	1053	141	78	63	23	324.174	25.805	9	9	42	35	42	23	10.334	4.428	32.574
s_1_1_SMACv1.0_contig 909	518	67	32	35	9	342.333	8.38	7	7	24	10	20	19	10.838	3.358	42.471
s_1_1_SMACv1.0_contig 910	1361	255	125	130	42	332.69	34.776	22	22	80	43	83	39	15.023	5.665	38.501
s_1_1_SMACv1.0_contig 911	1257	127	75	52	24	329.917	24.663	10	10	34	24	34	20	8.418	3.684	35.243
s_1_1_SMACv1.0_contig 912	510	45	22	23	7	330.714	43.872	5	5	12	7	16	22	8.104	5.219	32.549
s_1_1_SMACv1.0_contig 913	745	66	30	36	14	331.786	31.907	5	5	10	17	23	18	7.533	3.821	40.134
s_1_1_SMACv1.0_contig 914	1796	182	97	85	41	338	27.588	12	12	27	45	58	17	8.439	3.295	39.198
s_1_1_SMACv1.0_contig 915	567	49	27	22	7	341.857	21.859	3	3	12	17	13	15	7.185	3.671	37.213
s_1_1_SMACv1.0_contig 916	792	131	72	59	22	338.636	19.713	8	8	46	23	43	24	14.163	4.238	36.111
s_1_1_SMACv1.0_contig 917	568	58	25	33	6	324.167	22.741	6	6	14	18	13	17	8.998	3.451	38.38
s_1_1_SMACv1.0_contig 918	521	198	116	82	15	323	31.906	11	11	27	114	57	39	21.021	10.996	65.067
s_1_1_SMACv1.0_contig 919	576	55	23	32	3	312	2.16	7	7	22	13	11	15	6.832	3.139	35.59
s_1_1_SMACv1.0_contig 920	550	30	18	12	3	348.333	10.656	5	5	8	4	9	12	5.565	2.759	33.273
s_1_1_SMACv1.0_contig 921	488	35	16	19	5	314.4	29.924	4	4	8	9	8	15	5.846	3.65	34.221
s_1_1_SMACv1.0_contig 922	513	66	29	37	8	324.375	29.385	5	5	11	27	16	25	11.458	6.574	35.283
s_1_1_SMACv1.0_contig 923	716	100	51	49	10	317.5	27.976	3	3	47	27	21	21	9.504	4.456	33.939
s_1_1_SMACv1.0_contig 924	621	57	30	27	7	340.429	23.015	9	9	8	17	13	18	7.345	4.261	39.775
s_1_1_SMACv1.0_contig 925	1546	174	85	89	31	335.484	29.682	23	23	47	15	55	27	10.662	5.449	31.695
s_1_1_SMACv1.0_contig 926	551	120	55	65	19	321.895	25.569	4	4	39	34	28	38	17.29	8.357	37.024
s_1_1_SMACv1.0_contig 927	651	52	32	20	13	327.308	39.246	3	3	7	12	17	14	7.508	2.801	31.336
s_1_1_SMACv1.0_contig 928	527	81	46	35	9	325.333	25.703	3	3	38	19	21	20	12.736	3.979	42.694
s_1_1_SMACv1.0_contig 929	1027	174	85	89	28	333.464	27.466	13	13	53	35	57	28	14.072	5.657	39.338
s_1_1_SMACv1.0_contig 930	560	53	30	23	9	333.444	18.839	2	2	18	13	18	15	8.034	3.332	32.857
s_1_1_SMACv1.0_contig 931	600	55	22	33	12	338.667	24.918	4	4	4	16	17	16	8.907	4.117	36.5
s_1_1_SMACv1.0_contig 932	742	88	42	46	14	340.214	32.056	7	7	30	16	24	17	9.469	3.804	39.757
s_1_1_SMACv1.0_contig 933	675	66	33	33	8	319.625	30.586	6	6	22	15	14	17	8.157	4.697	33.333
s_1_1_SMACv1.0_contig 934	490	31	15	16	2	330	20	3	3	13	7	3	16	5.5	3.952	33.265
s_1_1_SMACv1.0_contig 935	531	56	24	32	8	316.375	29.887	5	5	26	4	13	19	8.766	3.803	41.431
s_1_1_SMACv1.0_contig 936	745	70	29	41	9	343.667	23.954	11	11	21	8	17	16	8.005	3.2	33.96
s_1_1_SMACv1.0_contig 937	1511	178	85	93	45	340.289	22.278	16	16	25	25	75	23	11.247	4.519	42.488
s_1_1_SMACv1.0_contig 938	640	102	53	49	18	323.667	36.254	12	12	28	14	35	24	13.209	5.517	38.125
s_1_1_SMACv1.0_contig 939	931	143	70	73	22	326.955	29.626	13	13	47	23	46	25	12.524	4.164	37.164
s_1_1_SMACv1.0_contig 940	634	63	29	34	5	323.6	33.85	7	7	20	17	13	13	7.45	2.994	47.792
s_1_1_SMACv1.0_contig 941	1087	107	49	58	14	337.929	24.592	11	11	32	20	30	16	8.562	3.181	42.226
s_1_1_SMACv1.0_contig 942	1415	232	111	121	41	333.098	36.633	20	20	43	57	80	30	14.161	6.448	34.841
s_1_1_SMACv1.0_contig 943	1671	263	136	127	54	334.278	24.467	27	27	49	44	80	34	14.066	8.447	35.428
s_1_1_SMACv1.0_contig 944	1025	117	58	59	24	324.792	35.095	9	9	17	34	36	21	9.225	4.333	39.707
s_1_1_SMACv1.0_contig 945	510	118	80	38	12	327.583	27.843	5	5	55	25	36	32	15.494	8.01	56.667
s_1_1_SMACv1.0_contig 946	686	71	38	33	14	343.429	23.491	7	7	15	11	24	21	10.602	5.476	38.776
s_1_1_SMACv1.0_contig 947	733	100	49	51	18	332.111	23.163	9	9	24	21	35	18	10.978	3.966	41.746
s_1_1_SMACv1.0_contig 948	1009	121	62	59	25	339.56	32.401	12	12	29	17	36	20	10.414	4.493	36.571
s_1_1_SMACv1.0_contig 949	836	88	51	37	14	331.786	22.842	11	11	21	16	23	16	9.187	2.959	38.756
s_1_1_SMACv1.0_contig 950	536	31	17	14	6	316.333	31.92	1	1	11	5	11	10	5.203	2.151	36.007
s_1_1_SMACv1.0_contig 951	1122	109	53	56	23	334.304	26.604	12	12	23	12	38	19	8.474	3.596	37.611
s_1_1_SMACv1.0_contig 952	1904	227	112	115	51	334.02	27.571	15	15	47	40	84	21	10.893	4.138	38.393
s_1_1_SMACv1.0_contig 953	1178	153	72	81	19	334.105	30.973	17	17	51	29	34	22	10.131	4.263	32.767
s_1_1_SMACv1.0_contig 954	780	110	50	60	23	332.391	31.944	10	10	28	16	39	24	11.403	4.367	40.513
s_1_1_SMACv1.0_contig 955	535	71	35	36	10	337.6	17.968	3	3	24	19	23	20	10.022	4.764	44.112
s_1_1_SMACv1.0_contig 956	622	62	31	31	9	340.556	28.269	4	4	27	9	14	16	8.399	3.803	36.817
s_1_1_SMACv1.0_contig 957	618	95	46	49	16	335.25	32.784	9	9	26	19	27	24	12.895	5.833	40.129
s_1_1_SMACv1.0_contig 958	1223	102	52	50	13	341.538	30.598	18	18	21	17	28	16	7.087	3.45	35.078
s_1_1_SMACv1.0_contig 959	521	97	44	53	9	330.444	44.078	3	3	30	39	25	23	11.23	4.231	48.944
s_1_1_SMACv1.0_contig 960	1585	212	106	106	48	334.542	30.579	12	12	58	30	72	25	11.791	4.282	38.107
s_1_1_SMACv1.0_contig 961	586	52	28	24	7	354.429	26.725	4	4	16	14	10	12	6.814	2.597	42.15
s_1_1_SMACv1.0_contig 962	456	21	10	11	1	346	0	2	2	8	7	2	8	3.91	1.983	32.675
s_1_1_SMACv1.0_contig 963	501	42	22	20	4	338.75	9.257	2	2	14	14	12	15	7.589	3.926	34.731
s_1_1_SMACv1.0_contig 964	1580	239	113	126	49	330.102	28.424	29	29	44	38	71	25	13.08	4.372	32.658
s_1_1_SMACv1.0_contig 965	651	65	28	37	10	338	13.372	6	6	14	18	21	15	8.74	3.776	37.634
s_1_1_SMACv1.0_contig 966	2225	227	126	101	49	336.204	28.931	17	17	44	49	79	19	8.373	3.446	38.831
s_1_1_SMACv1.0_contig 967	543	87	36	51	8	344.25	19.434	9	9	29	23	26	24	12.114	5.948	42.91
s_1_1_SMACv1.0_contig 968	1133	143	68	75	25	333.12	20.168	9	9	24	48	54	26	10.212	5.761	38.835
s_1_1_SMACv1.0_contig 969	850	182	78	104	24	332.125	30.687	19	19	41	52	53	32	17.109	6.935	37.882
s_1_1_SMACv1.0_contig 970	688	57	22	35	4	315.5	22.322	9	9	16	14	11	15	7.375	2.901	38.953
s_1_1_SMACv1.0_contig 971	553	33	22	11	3	337.333	44.252	3	3	5	13	11	10	6.175	2.023	33.454
s_1_1_SMACv1.0_contig 972	630	65	35	30	8	328.25	22.982	10	10	22	7	12	16	8.398	3.386	31.905
s_1_1_SMACv1.0_contig 973	823	63	32	31	3	358.667	15.691	6	6	23	22	13	11	6.108	2.465	32.685
s_1_1_SMACv1.0_contig 974	724	60	31	29	10	338.3	33.705	4	4	8	24	16	14	7.065	2.491	35.083
s_1_1_SMACv1.0_contig 975	619	97	47	50	13	336.615	30.568	3	3	53	10	32	22	12.796	4.84	36.026
s_1_1_SMACv1.0_contig 976	514	30	20	10	6	345.667	17.717	0	0	7	10	10	10	5.438	2.245	31.323
s_1_1_SMACv1.0_contig 977	1083	202	80	122	32	336.906	28.436	13	13	72	36	54	32	15.378	6.411	42.198
s_1_1_SMACv1.0_contig 978	595	75	38	37	8	329.75	21.046	13	13	17	14	21	21	9.501	4.583	30.252
s_1_1_SMACv1.0_contig 979	535	55	25	30	8	327.375	34.07	6	6	10	14	17	15	9.338	3.7	40.374
s_1_1_SMACv1.0_contig 980	1317	183	88	95	31	329.323	25.556	7	7	69	34	58	26	10.861	5.54	44.191
s_1_1_SMACv1.0_contig 981	798	127	65	62	26	322.962	27.723	12	12	15	28	37	27	15.14	6.555	35.965
s_1_1_SMACv1.0_contig 982	544	52	29	23	6	341	19.664	7	7	23	3	15	13	7.208	2.948	38.971
s_1_1_SMACv1.0_contig 983	826	137	72	65	23	323.783	31.058	10	10	39	27	50	26	13.105	6.527	52.663
s_1_1_SMACv1.0_contig 984	605	72	31	41	18	339	27.895	5	5	19	7	22	19	10.336	4.217	37.19
s_1_1_SMACv1.0_contig 985	725	136	63	73	21	331.524	18.052	7	7	43	37	55	26	14.152	6.248	43.862
s_1_1_SMACv1.0_contig 986	525	62	34	28	5	312.8	40.696	5	5	24	17	17	14	8.539	3.041	34.286
s_1_1_SMACv1.0_contig 987	549	55	32	23	5	315.4	32.401	4	4	26	11	12	14	7.798	3.518	29.508
s_1_1_SMACv1.0_contig 988	666	76	28	48	13	333.846	23.641	5	5	26	12	26	22	10.309	4.509	37.988
s_1_1_SMACv1.0_contig 989	714	68	27	41	6	333.667	21.045	7	7	32	9	14	15	7.769	3.176	38.375
s_1_1_SMACv1.0_contig 990	1124	153	66	87	33	339.97	23.203	15	15	33	17	61	34	13.013	6.852	36.032
s_1_1_SMACv1.0_contig 991	709	69	39	30	12	327.917	32.788	8	8	24	5	21	16	8.319	3.646	36.248
s_1_1_SMACv1.0_contig 992	674	85	42	43	14	337	34.463	7	7	30	13	30	19	10.61	4.067	38.279
s_1_1_SMACv1.0_contig 993	1229	114	56	58	25	333.72	24.702	8	8	22	25	32	18	8.031	3.145	37.673
s_1_1_SMACv1.0_contig 994	789	88	39	49	13	346.308	21.316	11	11	19	20	24	17	9.289	3.204	38.276
s_1_1_SMACv1.0_contig 995	713	38	20	18	3	314.333	35.518	8	8	9	5	9	15	4.999	4.747	31.557
s_1_1_SMACv1.0_contig 996	614	86	51	35	15	330.133	35.532	9	9	6	30	30	23	12.137	4.835	43.974
s_1_1_SMACv1.0_contig 997	509	35	21	14	5	336.6	24.937	4	4	5	12	10	10	5.383	2.127	35.953
s_1_1_SMACv1.0_contig 998	550	40	21	19	6	359.667	18.909	5	5	8	9	13	13	6.296	2.998	32.727
s_1_1_SMACv1.0_contig 999	530	55	16	39	4	308.5	17.529	4	4	26	10	25	20	9.945	5.863	37.17
s_1_1_SMACv1.0_contig 1000	1049	133	69	64	23	327.826	25.634	17	17	32	20	47	17	10.754	3.183	41.659
s_1_1_SMACv1.0_contig 1001	593	54	22	32	8	319	25.86	5	5	17	11	19	16	7.614	3.886	39.292
s_1_1_SMACv1.0_contig 1002	514	62	29	33	5	354.2	21.113	4	4	28	14	17	19	9.364	4.112	34.241
s_1_1_SMACv1.0_contig 1003	721	108	60	48	17	330.529	17.215	3	3	44	21	44	20	10.816	4.06	52.288
s_1_1_SMACv1.0_contig 1004	575	65	31	34	4	336.75	29.457	6	6	17	25	18	17	9.779	3.333	35.652
s_1_1_SMACv1.0_contig 1005	675	69	35	34	12	335.667	34.291	7	7	22	8	19	20	9.001	3.883	30.667
s_1_1_SMACv1.0_contig 1006	591	82	32	50	11	345.273	31.381	10	10	25	13	21	27	12.511	7.183	38.917
s_1_1_SMACv1.0_contig 1007	817	103	43	60	13	338.231	22.699	8	8	38	22	31	22	9.835	4.594	34.884
s_1_1_SMACv1.0_contig 1008	1050	147	67	80	30	333.133	36.8	13	13	47	11	60	23	12.245	5.183	34.857
s_1_1_SMACv1.0_contig 1009	891	79	35	44	12	336.667	28.476	5	5	26	17	19	16	7.515	3.005	36.925
s_1_1_SMACv1.0_contig 1010	760	144	76	68	25	329	31.047	12	12	34	33	43	28	14.438	7.021	46.974
s_1_1_SMACv1.0_contig 1011	706	1058	558	500	8	319.125	28.55	10	10	538	480	993	847	128.949	263.809	34.419
s_1_1_SMACv1.0_contig 1012	1323	143	72	71	23	332.043	21.325	14	14	32	35	44	22	9.104	4.113	37.793
s_1_1_SMACv1.0_contig 1013	1177	213	117	96	48	332.271	24.777	17	17	55	23	75	41	15.727	9.655	36.279
s_1_1_SMACv1.0_contig 1014	612	59	31	28	10	332.7	29.264	6	6	23	3	16	13	7.846	2.487	37.745
s_1_1_SMACv1.0_contig 1015	826	85	42	43	8	342.5	20.433	11	11	29	16	23	19	8.459	4.008	33.051
s_1_1_SMACv1.0_contig 1016	709	96	57	39	15	327.267	21.437	7	7	26	26	35	21	9.843	4.458	53.738
s_1_1_SMACv1.0_contig 1017	784	189	98	91	31	336.806	25.531	17	17	46	42	56	32	19.263	7.396	38.903
s_1_1_SMACv1.0_contig 1018	810	96	47	49	17	324.412	24.931	8	8	23	22	31	16	10.28	3.5	39.259
s_1_1_SMACv1.0_contig 1019	735	51	23	28	8	337.875	45.295	6	6	18	4	17	13	6.61	2.689	37.551
s_1_1_SMACv1.0_contig 1020	709	77	32	45	12	345	21.871	5	5	15	24	20	17	9.722	3.954	36.107
s_1_1_SMACv1.0_contig 1021	1100	176	90	86	24	332.958	28.559	20	20	40	45	46	29	12.522	5.854	42.909
s_1_1_SMACv1.0_contig 1022	1053	162	77	85	20	342.75	23.803	15	15	50	39	39	24	12.46	4.349	42.83
s_1_1_SMACv1.0_contig 1023	524	59	21	38	6	306	36.29	3	3	17	24	14	14	8.414	3.268	37.214
s_1_1_SMACv1.0_contig 1024	533	57	34	23	11	341.636	20.245	2	2	18	13	22	19	9.028	4.45	39.587
s_1_1_SMACv1.0_contig 1025	1241	161	84	77	29	335.034	26.901	17	17	32	32	48	24	12.068	4.638	35.294
s_1_1_SMACv1.0_contig 1026	1523	234	118	116	41	343.293	30.723	12	12	77	44	79	22	12.461	4.171	39.068
s_1_1_SMACv1.0_contig 1027	505	33	19	14	6	307.833	34.046	1	1	12	6	14	9	5.392	2.25	30.495
s_1_1_SMACv1.0_contig 1028	784	100	52	48	13	321.308	31.321	9	9	24	30	30	19	10.852	4.336	44.898
s_1_1_SMACv1.0_contig 1029	535	99	48	51	8	324.25	23.285	4	4	51	22	26	24	14.374	4.461	37.009
s_1_1_SMACv1.0_contig 1030	659	62	33	29	6	325.667	16.183	3	3	9	34	15	16	7.982	3.381	34.598
s_1_1_SMACv1.0_contig 1031	809	105	50	55	6	328.167	33.667	20	20	19	26	27	25	11.959	5.462	32.509
s_1_1_SMACv1.0_contig 1032	1146	256	126	130	55	334.945	28.697	25	25	57	31	98	45	19.994	11.377	39.092
s_1_1_SMACv1.0_contig 1033	730	75	42	33	16	331.5	30.775	8	8	14	12	30	18	8.684	3.831	31.233
s_1_1_SMACv1.0_contig 1034	1299	150	72	78	31	338.516	22.677	5	5	41	37	49	22	9.052	4.275	39.723
s_1_1_SMACv1.0_contig 1035	657	55	28	27	11	336.545	26.033	4	4	11	14	15	15	7.572	2.896	37.9
s_1_1_SMACv1.0_contig 1036	611	56	30	26	11	347.182	22.465	10	10	8	6	22	13	8.543	2.795	37.48
s_1_1_SMACv1.0_contig 1037	727	111	51	60	13	331.538	23.094	6	6	46	24	35	20	11.942	3.024	36.451
s_1_1_SMACv1.0_contig 1038	613	66	31	35	10	328	42.235	4	4	18	20	16	16	9.316	3.989	40.294
s_1_1_SMACv1.0_contig 1039	1094	194	92	102	37	330.297	33.353	13	13	45	45	68	32	15.215	6.455	44.15
s_1_1_SMACv1.0_contig 1040	651	114	60	54	13	336.769	19.204	8	8	42	29	31	27	13.576	5.555	36.098
s_1_1_SMACv1.0_contig 1041	547	89	43	46	5	330.4	8.452	8	8	39	21	21	25	12.951	5.742	30.53
s_1_1_SMACv1.0_contig 1042	550	49	24	25	3	354	6.164	2	2	18	17	17	17	8.462	3.269	32
s_1_1_SMACv1.0_contig 1043	986	97	50	47	11	337.545	24.876	10	10	27	26	26	17	7.886	3.37	39.757
s_1_1_SMACv1.0_contig 1044	573	24	11	13	6	331	36.437	3	3	2	3	10	8	4.585	1.796	35.428
s_1_1_SMACv1.0_contig 1045	541	164	78	86	15	334.933	23.162	7	7	72	47	40	41	17.643	10.599	67.098
s_1_1_SMACv1.0_contig 1046	573	52	25	27	8	327.375	29.812	6	6	20	4	18	13	7.716	2.412	35.951
s_1_1_SMACv1.0_contig 1047	639	76	44	32	6	318.667	26.65	9	9	26	18	15	21	9.502	4.168	33.177
s_1_1_SMACv1.0_contig 1048	1089	134	70	64	11	327.545	33.143	25	25	44	15	32	21	10.811	4.832	32.048
s_1_1_SMACv1.0_contig 1049	1016	120	59	61	11	327.182	32.646	11	11	43	32	29	18	9.37	3.673	37.205
s_1_1_SMACv1.0_contig 1050	864	101	52	49	23	330	31.694	4	4	27	19	38	19	10.084	3.565	45.255
s_1_1_SMACv1.0_contig 1051	937	108	55	53	18	325.389	29.967	9	9	23	25	36	24	11.604	5.961	39.381
s_1_1_SMACv1.0_contig 1052	540	47	28	19	5	340	28.615	5	5	14	12	16	13	7.819	2.397	35.741
s_1_1_SMACv1.0_contig 1053	568	86	45	41	12	320.167	28.571	4	4	23	30	22	20	11.87	4.172	35.739
s_1_1_SMACv1.0_contig 1054	855	113	52	61	17	325.529	39.845	8	8	44	18	33	19	9.986	3.189	44.678
s_1_1_SMACv1.0_contig 1055	668	108	51	57	22	323.682	28.221	6	6	29	23	39	30	11.479	5.407	46.707
s_1_1_SMACv1.0_contig 1056	503	96	51	45	9	322.778	30.084	8	8	44	18	30	24	14.831	5.951	40.159
s_1_1_SMACv1.0_contig 1057	798	86	43	43	9	328.111	16.789	14	14	13	26	18	22	9.461	4.483	41.479
s_1_1_SMACv1.0_contig 1058	601	84	42	42	8	338.5	20.292	10	10	26	21	25	24	11.205	6.998	37.438
s_1_1_SMACv1.0_contig 1059	492	77	43	34	10	337.5	40.038	5	5	32	13	26	23	12.173	6.126	38.618
s_1_1_SMACv1.0_contig 1060	953	132	62	70	23	333.435	28.638	16	16	23	29	48	23	11.831	5.387	34.418
s_1_1_SMACv1.0_contig 1061	741	152	57	95	14	320.286	28.885	11	11	66	32	44	33	15.48	7.119	41.43
s_1_1_SMACv1.0_contig 1062	845	117	64	53	21	320.143	31.255	10	10	28	26	40	23	11.517	4.834	39.29
s_1_1_SMACv1.0_contig 1063	555	52	30	22	10	326.6	27.616	3	3	15	10	11	19	8.505	4.225	40.721
s_1_1_SMACv1.0_contig 1064	740	79	49	30	9	332.222	14.756	13	13	22	13	19	16	8.797	3.486	45.811
s_1_1_SMACv1.0_contig 1065	628	44	13	31	5	337.8	10.685	5	5	18	5	11	12	5.518	2.315	30.573
s_1_1_SMACv1.0_contig 1066	1186	275	129	146	56	331.589	28.521	13	13	89	43	105	34	17.054	6.23	51.686
s_1_1_SMACv1.0_contig 1067	650	77	45	32	8	351.625	11.235	9	9	20	22	19	20	8.854	4.293	33.692
s_1_1_SMACv1.0_contig 1068	554	71	48	23	7	334.714	43.797	6	6	26	19	15	22	9.894	5.746	40.253
s_1_1_SMACv1.0_contig 1069	558	53	20	33	11	326	23.041	3	3	13	11	15	14	8.348	3.596	41.577
s_1_1_SMACv1.0_contig 1070	584	66	30	36	8	347.625	12.379	8	8	14	20	14	16	8.762	4.104	35.274
s_1_1_SMACv1.0_contig 1071	662	109	48	61	18	338.722	29.987	7	7	32	24	33	27	11.705	5.691	64.35
s_1_1_SMACv1.0_contig 1072	792	93	51	42	13	311	25.643	7	7	42	10	22	19	9.154	3.888	38.51
s_1_1_SMACv1.0_contig 1073	837	95	47	48	13	324.769	34.566	8	8	34	19	23	16	8.278	2.878	43.011
s_1_1_SMACv1.0_contig 1074	1208	94	49	45	20	333.8	39.307	9	9	20	16	35	16	6.925	3.035	38.907
s_1_1_SMACv1.0_contig 1075	582	75	26	49	9	323.444	32.968	8	8	13	26	19	20	11.045	4.386	36.77
s_1_1_SMACv1.0_contig 1076	581	115	59	56	17	330.176	31.435	1	1	51	25	25	26	16.167	6.269	39.071
s_1_1_SMACv1.0_contig 1077	871	86	50	36	14	328.286	22.97	9	9	18	21	21	17	8.518	3.726	37.084
s_1_1_SMACv1.0_contig 1078	729	51	27	24	7	320	33.14	6	6	16	5	22	12	6.461	2.475	29.767
s_1_1_SMACv1.0_contig 1079	723	72	34	38	10	348.3	19.334	11	11	18	10	17	15	8.444	3.544	36.1
s_1_1_SMACv1.0_contig 1080	568	36	19	17	4	324.25	18.403	3	3	3	18	12	12	5.692	2.379	36.092
s_1_1_SMACv1.0_contig 1081	944	73	36	37	13	332.231	23.785	7	7	22	9	24	17	6.84	3.096	36.123
s_1_1_SMACv1.0_contig 1082	720	60	34	26	7	320.857	24.701	10	10	8	18	18	18	7.183	4.083	37.083
s_1_1_SMACv1.0_contig 1083	1013	102	50	52	20	335.25	25.532	11	11	25	13	30	20	8.747	3.859	40.375
s_1_1_SMACv1.0_contig 1084	893	122	63	59	18	333.778	28.14	8	8	41	24	34	30	12.296	5.017	32.475
s_1_1_SMACv1.0_contig 1085	844	157	84	73	29	333.724	32.659	17	17	42	20	44	31	16.128	8.663	35.9
s_1_1_SMACv1.0_contig 1086	518	24	11	13	1	294	0	3	3	6	6	9	13	5.867	3.513	28.378
s_1_1_SMACv1.0_contig 1087	1333	127	58	69	23	327.696	28.354	14	14	26	23	43	20	8.829	3.713	38.935
s_1_1_SMACv1.0_contig 1088	1190	124	65	59	26	329.038	27.042	11	11	29	18	45	22	9.327	4.224	38.235
s_1_1_SMACv1.0_contig 1089	681	80	36	44	11	321.636	32.1	6	6	24	17	26	18	9.658	4.237	40.088
s_1_1_SMACv1.0_contig 1090	507	49	23	26	3	296	35.693	4	4	18	16	9	14	7.359	2.946	34.714
s_1_1_SMACv1.0_contig 1091	887	80	40	40	23	335.522	29.609	5	5	8	16	39	15	7.76	2.376	39.91
s_1_1_SMACv1.0_contig 1092	623	94	64	30	9	338.778	29.578	6	6	24	39	23	19	11.61	3.791	33.066
s_1_1_SMACv1.0_contig 1093	562	43	15	28	1	331	0	5	5	24	6	12	13	6.589	3.004	36.121
s_1_1_SMACv1.0_contig 1094	838	89	45	44	12	317.583	22.976	7	7	27	21	23	22	9.174	4.16	36.993
s_1_1_SMACv1.0_contig 1095	1192	210	93	117	44	332.341	25.353	17	17	45	40	69	39	15.123	7.562	34.48
s_1_1_SMACv1.0_contig 1096	716	71	29	42	11	332.818	22.97	4	4	21	19	30	14	7.573	3.136	40.503
s_1_1_SMACv1.0_contig 1097	545	46	19	27	3	319.333	15.173	4	4	18	14	17	10	5.965	1.821	36.697
s_1_1_SMACv1.0_contig 1098	677	62	38	24	9	340	14.166	5	5	18	16	14	15	7.99	2.95	35.155
s_1_1_SMACv1.0_contig 1099	1785	206	91	115	46	334.326	29.463	16	16	51	26	80	21	10.517	4.051	40.224
s_1_1_SMACv1.0_contig 1100	736	81	48	33	13	341.077	22.033	6	6	35	8	21	16	9.171	3.475	38.723
s_1_1_SMACv1.0_contig 1101	1100	133	65	68	22	341.909	30.991	11	11	34	30	42	18	9.91	3.943	39.818
s_1_1_SMACv1.0_contig 1102	730	57	32	25	8	340	27.495	4	4	16	13	17	15	6.959	2.975	33.562
s_1_1_SMACv1.0_contig 1103	582	48	21	27	7	332.143	19.127	5	5	13	11	19	15	6.531	2.909	35.052
s_1_1_SMACv1.0_contig 1104	938	140	65	75	32	334.656	26.762	5	5	46	17	52	28	12.991	6.957	38.806
s_1_1_SMACv1.0_contig 1105	539	36	21	15	5	303	24.698	3	3	13	7	12	13	5.666	2.481	38.776
s_1_1_SMACv1.0_contig 1106	1049	137	59	78	20	337.15	26.278	7	7	69	12	47	22	9.746	4.033	41.468
s_1_1_SMACv1.0_contig 1107	980	105	43	62	19	330.105	28.886	8	8	13	35	32	22	9.391	4.525	38.571
s_1_1_SMACv1.0_contig 1108	542	77	37	40	6	320.667	36.84	3	3	30	26	16	24	11.09	4.995	35.978
s_1_1_SMACv1.0_contig 1109	964	81	37	44	19	335.053	28.887	5	5	20	12	34	13	7.837	2.331	41.909
s_1_1_SMACv1.0_contig 1110	581	45	20	25	9	335.556	16.084	2	2	13	10	13	14	6.394	3.091	34.596
s_1_1_SMACv1.0_contig 1111	628	83	41	42	12	330.667	33.812	5	5	31	17	29	19	10.217	4.565	39.172
s_1_1_SMACv1.0_contig 1112	585	58	28	30	6	326.833	13.031	5	5	16	20	16	14	7.046	2.823	46.667
s_1_1_SMACv1.0_contig 1113	1705	317	168	149	52	331.115	28.28	33	33	87	54	84	32	15.145	7.263	38.358
s_1_1_SMACv1.0_contig 1114	514	43	27	16	4	322.75	16.679	2	2	11	17	11	15	8.294	2.913	38.132
s_1_1_SMACv1.0_contig 1115	524	42	22	20	3	291	10.985	7	7	8	13	11	14	7.361	3.728	29.58
s_1_1_SMACv1.0_contig 1116	500	37	17	20	8	324.75	31.088	2	2	7	10	12	11	6.502	2.399	38
s_1_1_SMACv1.0_contig 1117	1233	157	75	82	33	335.273	32.041	13	13	40	23	54	25	10.983	5.672	40.227
s_1_1_SMACv1.0_contig 1118	729	75	42	33	10	340	23.862	8	8	15	22	17	19	9.176	4.174	35.802
s_1_1_SMACv1.0_contig 1119	791	101	48	53	15	339.333	19.126	9	9	21	31	35	22	10.324	3.735	41.593
s_1_1_SMACv1.0_contig 1120	981	133	63	70	29	338.138	23.954	9	9	45	11	47	21	11.069	4.597	43.935
s_1_1_SMACv1.0_contig 1121	700	53	26	27	8	337.375	27.704	5	5	8	18	12	13	6.504	2.319	42.571
s_1_1_SMACv1.0_contig 1122	1189	104	44	60	19	340.211	21.11	6	6	27	25	26	18	7.172	3.225	39.865
s_1_1_SMACv1.0_contig 1123	651	49	24	25	4	331.25	15.139	2	2	30	4	13	17	7.432	3.483	30.722
s_1_1_SMACv1.0_contig 1124	612	85	45	40	11	321.364	39.939	5	5	34	19	30	25	10.471	6.157	36.111
s_1_1_SMACv1.0_contig 1125	1095	118	52	66	28	336.607	20.915	13	13	14	22	42	20	9.417	4.194	40.365
s_1_1_SMACv1.0_contig 1126	603	65	32	33	2	329.5	8.5	7	7	30	17	14	18	7.877	3.637	32.504
s_1_1_SMACv1.0_contig 1127	868	137	69	68	25	345.56	29.836	15	15	42	14	39	30	13.646	7.006	32.834
s_1_1_SMACv1.0_contig 1128	522	72	37	35	8	319.625	27.708	6	6	28	15	19	20	10.987	5.118	32.95
s_1_1_SMACv1.0_contig 1129	939	105	52	53	21	315.381	34.738	6	6	23	28	29	19	9.042	3.944	44.835
s_1_1_SMACv1.0_contig 1130	527	40	23	17	5	327.2	41.552	5	5	12	7	13	12	6.977	2.503	40.228
s_1_1_SMACv1.0_contig 1131	1115	220	111	109	51	332.549	29.683	10	10	67	28	85	32	16.119	6.245	49.596
s_1_1_SMACv1.0_contig 1132	511	58	24	34	3	311.667	23.156	8	8	21	13	16	19	9.276	4.111	32.094
s_1_1_SMACv1.0_contig 1133	760	76	31	45	13	327.692	27.181	9	9	11	19	21	18	9.221	4.035	35
s_1_1_SMACv1.0_contig 1134	623	64	32	32	10	335.3	19.215	2	2	20	19	23	16	8.21	3.415	44.783
s_1_1_SMACv1.0_contig 1135	526	70	21	49	6	337.833	26.792	4	4	32	17	21	17	8.135	4.428	61.787
s_1_1_SMACv1.0_contig 1136	880	68	36	32	12	331.333	29.887	6	6	14	15	25	14	6.573	2.659	36.136
s_1_1_SMACv1.0_contig 1137	718	101	49	52	16	348.625	18.316	10	10	31	14	28	24	13.249	4.808	34.68
s_1_1_SMACv1.0_contig 1138	718	102	47	55	14	320.357	18.878	6	6	20	39	25	24	11.595	5.934	36.072
s_1_1_SMACv1.0_contig 1139	519	41	19	22	5	338	17.332	5	5	13	7	7	14	6.418	2.956	41.233
s_1_1_SMACv1.0_contig 1140	557	85	34	51	12	327.25	35.979	5	5	24	25	31	27	12.989	6.677	35.368
s_1_1_SMACv1.0_contig 1141	539	41	26	15	3	303.333	28.194	3	3	18	9	6	17	6.08	3.423	30.241
s_1_1_SMACv1.0_contig 1142	713	52	24	28	8	328.5	31.181	5	5	16	10	15	11	5.919	2.099	40.954
s_1_1_SMACv1.0_contig 1143	798	56	35	21	8	341.375	18.894	5	5	16	13	15	14	5.793	2.676	38.596
s_1_1_SMACv1.0_contig 1144	807	76	36	40	10	337.2	22.449	9	9	26	11	25	14	7.996	2.788	36.927
s_1_1_SMACv1.0_contig 1145	535	61	30	31	7	336.714	18.729	5	5	9	27	15	15	8.983	3.376	50.654
s_1_1_SMACv1.0_contig 1146	540	34	21	13	6	328.333	27.035	3	3	6	10	12	11	5.311	2.505	35.37
s_1_1_SMACv1.0_contig 1147	577	51	27	24	3	328.333	19.362	9	9	10	15	11	15	8.066	3.132	35.355
s_1_1_SMACv1.0_contig 1148	896	203	100	103	43	325.977	26.546	20	20	38	35	62	38	19.213	8.994	38.951
s_1_1_SMACv1.0_contig 1149	761	109	56	53	15	337.467	23.858	13	13	40	9	34	23	13.095	5.443	34.954
s_1_1_SMACv1.0_contig 1150	682	81	50	31	13	329.154	27.335	12	12	6	24	26	18	10.724	3.737	38.856
s_1_1_SMACv1.0_contig 1151	584	49	23	26	6	349.833	19.625	3	3	11	20	12	15	6.428	3.343	41.781
s_1_1_SMACv1.0_contig 1152	1369	146	74	72	30	345.167	33.708	14	14	24	32	43	16	8.464	3.016	36.231
s_1_1_SMACv1.0_contig 1153	709	92	40	52	13	330.154	19.689	2	2	46	16	27	15	9.595	3.383	38.928
s_1_1_SMACv1.0_contig 1154	517	40	20	20	11	329.091	45.296	4	4	1	9	14	16	7.812	4.429	31.915
s_1_1_SMACv1.0_contig 1155	668	55	21	34	11	319.545	30.726	3	3	14	11	25	14	7.253	2.478	36.527
s_1_1_SMACv1.0_contig 1156	504	50	26	24	6	311	21.182	4	4	21	8	17	19	7.895	4.65	31.944
s_1_1_SMACv1.0_contig 1157	557	66	33	33	11	336.455	32.969	7	7	13	17	21	22	9.916	4.697	36.266
s_1_1_SMACv1.0_contig 1158	625	79	34	45	7	336.571	33.649	10	10	23	19	23	20	10.782	5.324	30.4
s_1_1_SMACv1.0_contig 1159	582	58	32	26	9	338.889	14.31	5	5	7	22	16	14	7.534	3.13	43.127
s_1_1_SMACv1.0_contig 1160	1014	198	110	88	32	331.344	27.125	25	25	41	41	65	31	16.003	6.355	38.856
s_1_1_SMACv1.0_contig 1161	501	73	29	44	6	360.333	31.842	3	3	24	30	16	20	10.762	3.532	37.924
s_1_1_SMACv1.0_contig 1162	861	129	75	54	15	333.733	33.877	8	8	51	31	39	22	11.178	4.618	41.812
s_1_1_SMACv1.0_contig 1163	771	84	47	37	15	318.667	25.85	9	9	13	19	22	18	9.607	3.446	40.856
s_1_1_SMACv1.0_contig 1164	515	35	17	18	6	327.167	24.183	3	3	8	7	21	14	6.402	3.086	28.35
s_1_1_SMACv1.0_contig 1165	532	70	34	36	10	329.3	37.486	6	6	31	6	20	21	9.949	4.897	34.962
s_1_1_SMACv1.0_contig 1166	523	56	30	26	7	332.571	24.348	3	3	17	19	16	15	8.658	2.94	33.843
s_1_1_SMACv1.0_contig 1167	835	98	56	42	15	326.333	24.412	7	7	38	15	28	18	8.879	3.569	38.323
s_1_1_SMACv1.0_contig 1168	794	87	42	45	19	324.789	26.81	8	8	12	19	22	25	9.723	5.053	33.627
s_1_1_SMACv1.0_contig 1169	957	90	40	50	18	322.5	27.203	10	10	12	18	35	21	8.964	4.404	40.334
s_1_1_SMACv1.0_contig 1170	672	87	42	45	18	333.111	25.08	6	6	30	9	29	21	10.501	5.283	41.369
s_1_1_SMACv1.0_contig 1171	736	199	107	92	28	334.643	26.639	11	11	79	39	60	35	16.52	6.8	69.429
s_1_1_SMACv1.0_contig 1172	785	81	30	51	6	320.5	22.194	9	9	25	26	24	17	7.759	2.977	31.21
s_1_1_SMACv1.0_contig 1173	1234	272	124	148	60	330.867	29.136	14	14	87	35	94	43	16.853	10.429	39.222
s_1_1_SMACv1.0_contig 1174	531	45	21	24	4	344.5	22.6	2	2	16	17	13	16	6.347	3.314	38.23
s_1_1_SMACv1.0_contig 1175	925	114	58	56	18	331.167	36.524	16	16	25	21	32	19	9.675	4.426	37.297
s_1_1_SMACv1.0_contig 1176	551	76	44	32	10	323.8	16.624	8	8	23	17	22	20	10.889	3.893	38.475
s_1_1_SMACv1.0_contig 1177	583	107	68	39	10	319.7	19.566	11	11	23	40	29	21	13.091	4.63	39.623
s_1_1_SMACv1.0_contig 1178	1010	139	57	82	27	326.519	27.083	11	11	42	18	47	25	11.27	5.135	32.97
s_1_1_SMACv1.0_contig 1179	515	41	18	23	7	340.857	36.67	2	2	8	13	12	19	6.899	3.649	35.34
s_1_1_SMACv1.0_contig 1180	746	102	43	59	20	328.85	31.921	7	7	29	19	33	21	11.043	4.744	44.236
s_1_1_SMACv1.0_contig 1181	831	103	57	46	16	325.75	35.603	9	9	32	19	29	16	10.611	2.775	33.454
s_1_1_SMACv1.0_contig 1182	536	53	27	26	8	319.875	33.665	6	6	12	13	11	16	8.431	4.354	35.075
s_1_1_SMACv1.0_contig 1183	689	78	29	49	10	320.3	24.597	8	8	27	14	21	27	9.192	6.102	33.091
s_1_1_SMACv1.0_contig 1184	1166	132	73	59	31	326.742	30.134	9	9	23	27	42	20	9.953	3.895	40.137
s_1_1_SMACv1.0_contig 1185	1116	109	51	58	23	334.957	28.566	8	8	30	13	36	18	9.103	3.761	37.724
s_1_1_SMACv1.0_contig 1186	599	125	57	68	21	341.19	23.575	6	6	36	32	46	31	17.29	7.304	38.731
s_1_1_SMACv1.0_contig 1187	913	115	65	50	17	336.294	31.425	11	11	45	13	33	27	10.142	5.556	36.145
s_1_1_SMACv1.0_contig 1188	591	56	30	26	6	334.167	15.399	9	9	14	12	16	17	8.09	4.205	33.164
s_1_1_SMACv1.0_contig 1189	567	58	42	16	8	343.125	19.94	6	6	10	19	14	23	9.141	5.52	34.039
s_1_1_SMACv1.0_contig 1190	739	108	49	59	25	335.44	31.649	7	7	31	13	40	22	10.66	4.797	55.886
s_1_1_SMACv1.0_contig 1191	732	80	44	36	8	314.25	27.261	8	8	32	14	19	21	8.945	5.116	33.88
s_1_1_SMACv1.0_contig 1192	643	132	69	63	16	329	33.3	16	16	26	35	33	32	18.46	6.4	37.636
s_1_1_SMACv1.0_contig 1193	146	15	4	11	0			0	0	5	10	1	14	5.89	5.019	71.233
s_1_1_SMACv1.0_contig 1194	1645	158	80	78	23	327.957	23.848	19	19	23	46	38	18	8.431	3.405	35.38
s_1_1_SMACv1.0_contig 1195	637	80	32	48	12	316.083	28.877	6	6	20	24	32	19	9.51	4.101	43.642
s_1_1_SMACv1.0_contig 1196	688	57	30	27	7	333.286	20.541	3	3	15	19	18	13	7.363	3.157	35.174
s_1_1_SMACv1.0_contig 1197	588	71	41	30	4	329.25	24.904	8	8	28	17	21	17	9.655	4.007	33.673
s_1_1_SMACv1.0_contig 1198	522	34	20	14	4	329.25	19.613	4	4	6	10	12	13	6.584	2.361	35.632
s_1_1_SMACv1.0_contig 1199	601	51	26	25	7	326	20.333	2	2	14	19	15	14	6.476	2.736	34.443
s_1_1_SMACv1.0_contig 1200	561	43	22	21	3	313.667	16.519	7	7	14	9	10	11	5.98	2.063	39.216
s_1_1_SMACv1.0_contig 1201	667	87	44	43	10	322.3	25.628	8	8	16	33	22	20	9.918	4.256	43.178
s_1_1_SMACv1.0_contig 1202	1241	158	76	82	19	337.474	28.555	11	11	58	36	47	29	9.749	4.9	37.792
s_1_1_SMACv1.0_contig 1203	646	59	28	31	4	332	21.806	6	6	25	13	14	12	7.452	2.814	34.83
s_1_1_SMACv1.0_contig 1204	534	53	23	30	7	343.429	23.409	4	4	21	9	14	16	8.487	3.924	32.584
s_1_1_SMACv1.0_contig 1205	512	56	24	32	7	321.429	23.772	5	5	14	18	16	16	8.455	3.343	35.352
s_1_1_SMACv1.0_contig 1206	1125	117	65	52	24	328.292	25.586	7	7	39	13	34	21	9.039	4.214	37.156
s_1_1_SMACv1.0_contig 1207	515	33	17	16	1	360	0	4	4	16	6	8	12	5.932	2.635	31.068
s_1_1_SMACv1.0_contig 1208	539	68	37	31	5	352.2	12.384	4	4	29	20	24	17	9.215	3.987	36.735
s_1_1_SMACv1.0_contig 1209	637	66	33	33	10	340.3	29.749	5	5	21	13	22	14	8.499	3.14	30.141
s_1_1_SMACv1.0_contig 1210	632	73	31	42	13	332.077	26.811	8	8	22	8	24	22	9.524	5.019	42.405
s_1_1_SMACv1.0_contig 1211	1103	184	98	86	36	336.306	27.871	19	19	46	23	62	35	15.348	7.342	38.441
s_1_1_SMACv1.0_contig 1212	1205	181	82	99	34	336.824	20.998	16	16	47	28	58	31	12.717	5.822	35.768
s_1_1_SMACv1.0_contig 1213	680	193	98	95	31	340.226	20.888	16	16	69	26	56	46	25.213	9.235	37.5
s_1_1_SMACv1.0_contig 1214	633	52	25	27	7	345.286	23.365	6	6	11	14	16	12	7.191	2.654	36.651
s_1_1_SMACv1.0_contig 1215	1017	96	48	48	23	334.435	32.88	7	7	20	16	34	20	8.525	4.067	37.266
s_1_1_SMACv1.0_contig 1216	551	35	18	17	4	348.25	23.594	3	3	13	8	9	9	5.648	1.862	37.568
s_1_1_SMACv1.0_contig 1217	536	36	16	20	3	319.333	15.085	4	4	15	5	16	12	6.037	2.519	32.836
s_1_1_SMACv1.0_contig 1218	501	94	53	41	7	305.714	38.384	3	3	34	39	23	29	15.263	6.311	42.315
s_1_1_SMACv1.0_contig 1219	658	141	71	70	16	325.125	33.745	4	4	60	40	40	30	16.684	8.171	40.729
s_1_1_SMACv1.0_contig 1220	634	73	37	36	15	329.533	24.514	4	4	18	17	22	19	8.907	4.731	35.331
s_1_1_SMACv1.0_contig 1221	607	87	49	38	12	347.583	28.817	9	9	24	19	26	23	12.405	5.147	36.903
s_1_1_SMACv1.0_contig 1222	540	47	20	27	3	327.333	16.859	4	4	20	12	13	14	6.259	2.938	34.074
s_1_1_SMACv1.0_contig 1223	672	85	39	46	9	326.444	11.157	7	7	28	25	30	28	9.455	5.907	32.738
s_1_1_SMACv1.0_contig 1224	596	74	32	42	9	333.667	23.921	2	2	38	14	16	18	8.943	3.197	40.268
s_1_1_SMACv1.0_contig 1225	929	110	55	55	14	324.357	30.326	14	14	35	16	35	22	10.58	4.331	32.4
s_1_1_SMACv1.0_contig 1226	1263	326	168	158	55	327.145	31.824	19	19	112	56	99	36	20.545	7.816	50.594
s_1_1_SMACv1.0_contig 1227	747	97	50	47	14	332.214	23.44	8	8	27	24	25	19	10.312	4.11	32.664
s_1_1_SMACv1.0_contig 1228	579	69	38	31	9	331.667	32.88	4	4	20	21	20	16	9.054	3.003	35.06
s_1_1_SMACv1.0_contig 1229	628	66	30	36	6	336.833	26.347	5	5	25	19	15	18	8.119	4.156	38.854
s_1_1_SMACv1.0_contig 1230	763	136	67	69	14	329.5	37.847	8	8	50	42	40	28	12.828	5.691	35.518
s_1_1_SMACv1.0_contig 1231	685	55	26	29	13	336.308	31.626	3	3	13	10	21	14	7.15	3.652	36.058
s_1_1_SMACv1.0_contig 1232	512	34	13	21	2	335	18	3	3	15	6	13	16	5.973	3.377	33.008
s_1_1_SMACv1.0_contig 1233	669	70	35	35	12	337.083	18.936	3	3	12	27	24	18	8.094	4.544	40.807
s_1_1_SMACv1.0_contig 1234	531	80	36	44	8	339.375	29.18	5	5	31	22	24	24	12.742	5.158	37.853
s_1_1_SMACv1.0_contig 1235	584	53	21	32	7	339.286	29.836	3	3	13	20	23	18	7.654	3.631	36.301
s_1_1_SMACv1.0_contig 1236	508	32	17	15	3	305	22.554	6	6	11	2	10	12	5.232	2.143	39.37
s_1_1_SMACv1.0_contig 1237	671	50	18	32	6	332.667	39.811	7	7	19	4	16	12	6.347	2.443	36.066
s_1_1_SMACv1.0_contig 1238	781	74	40	34	11	329.455	29.448	9	9	16	16	22	16	8.609	2.837	36.364
s_1_1_SMACv1.0_contig 1239	928	137	67	70	26	348.808	32.424	15	15	34	20	44	20	12.895	4.131	34.052
s_1_1_SMACv1.0_contig 1240	859	109	49	60	20	325.35	30.962	8	8	28	23	31	20	10.581	3.808	44.936
s_1_1_SMACv1.0_contig 1241	1374	110	52	58	22	338.091	25.472	10	10	14	26	31	15	7.655	3.434	35.007
s_1_1_SMACv1.0_contig 1242	589	52	27	25	9	336.444	24.486	5	5	19	5	17	13	7.153	2.742	38.54
s_1_1_SMACv1.0_contig 1243	708	75	37	38	3	342.333	27.777	11	11	25	22	13	17	8.468	3.759	33.616
s_1_1_SMACv1.0_contig 1244	540	62	27	35	12	330.667	25.001	5	5	9	16	26	15	10.624	3.471	41.296
s_1_1_SMACv1.0_contig 1245	813	69	38	31	11	332.455	32.106	5	5	18	17	23	15	7.293	2.745	37.269
s_1_1_SMACv1.0_contig 1246	597	53	24	29	4	331.25	10.305	1	1	27	13	14	16	7.446	3.76	32.496
s_1_1_SMACv1.0_contig 1247	786	73	31	42	12	329.5	18.897	7	7	18	16	24	15	7.796	2.652	43.13
s_1_1_SMACv1.0_contig 1248	726	69	35	34	8	346.125	28.078	11	11	15	14	16	13	7.745	2.343	32.231
s_1_1_SMACv1.0_contig 1249	755	136	63	73	29	339.103	25.407	13	13	30	20	53	31	15.781	8.736	41.457
s_1_1_SMACv1.0_contig 1250	927	163	83	80	36	337.917	23.967	8	8	40	30	60	28	14.973	6.151	38.188
s_1_1_SMACv1.0_contig 1251	569	42	22	20	5	318.8	14.302	6	6	12	7	11	13	6.752	3.113	33.919
s_1_1_SMACv1.0_contig 1252	1220	121	57	64	29	336.276	26.893	12	12	19	20	48	15	8.661	2.787	39.508
s_1_1_SMACv1.0_contig 1253	663	67	35	32	13	316.615	34.486	6	6	9	20	20	16	8.332	3.139	39.97
s_1_1_SMACv1.0_contig 1254	1118	224	112	112	40	337.85	21.674	14	14	67	46	63	35	16.511	8.533	37.209
s_1_1_SMACv1.0_contig 1255	699	50	29	21	9	324.222	34.467	3	3	16	10	17	12	5.827	2.473	37.196
s_1_1_SMACv1.0_contig 1256	1209	269	127	142	50	335.76	28.379	10	10	98	47	84	43	17.302	8.596	46.237
s_1_1_SMACv1.0_contig 1257	560	58	33	25	6	330.833	32.205	6	6	20	13	11	15	8.43	2.919	39.464
s_1_1_SMACv1.0_contig 1258	536	9	6	3	0			0	0	7	1	2	8	2.22	1.908	37.687
s_1_1_SMACv1.0_contig 1259	723	82	41	41	9	333.889	26.526	12	12	15	25	24	18	8.989	3.948	39.972
s_1_1_SMACv1.0_contig 1260	1260	130	56	74	21	331.952	29.092	8	8	44	27	41	19	7.715	3.67	39.603
s_1_1_SMACv1.0_contig 1261	1100	148	70	78	22	338.455	26.129	12	12	44	33	41	24	11.202	5.07	38.818
s_1_1_SMACv1.0_contig 1262	868	67	33	34	14	315.5	23.295	9	9	9	12	21	13	6.955	2.69	44.355
s_1_1_SMACv1.0_contig 1263	479	56	28	28	4	333.5	17.557	5	5	23	15	13	20	8.242	4.287	45.094
s_1_1_SMACv1.0_contig 1264	634	57	24	33	8	338.25	23.376	5	5	6	24	18	16	8.494	3.968	38.959
s_1_1_SMACv1.0_contig 1265	803	67	36	31	9	338	29.193	7	7	15	18	22	13	7.451	2.469	35.118
s_1_1_SMACv1.0_contig 1266	640	78	49	29	10	334.9	20.032	6	6	26	19	23	19	9.5	3.485	40.312
s_1_1_SMACv1.0_contig 1267	590	50	25	25	9	317.444	34.897	4	4	12	9	14	16	7.681	3.716	37.627
s_1_1_SMACv1.0_contig 1268	508	70	33	37	6	344.167	20.194	3	3	43	9	19	19	9.217	3.809	44.291
s_1_1_SMACv1.0_contig 1269	765	144	68	76	24	330	28.608	13	13	44	25	36	36	15.719	7.84	34.902
s_1_1_SMACv1.0_contig 1270	514	61	37	24	5	326	24.199	3	3	23	22	14	18	8.44	4.198	33.852
s_1_1_SMACv1.0_contig 1271	607	65	34	31	9	341.444	26.895	3	3	19	19	17	21	9.147	4.025	35.75
s_1_1_SMACv1.0_contig 1272	529	50	26	24	9	321.889	11.318	3	3	18	7	18	17	7.892	3.627	38.941
s_1_1_SMACv1.0_contig 1273	642	51	24	27	5	340.2	10.419	7	7	15	10	15	13	6.698	2.872	33.178
s_1_1_SMACv1.0_contig 1274	572	43	17	26	3	321.667	25.223	5	5	9	18	7	13	6.058	2.753	34.266
s_1_1_SMACv1.0_contig 1275	670	46	19	27	6	342.833	27.425	6	6	14	6	22	12	6.533	2.876	37.91
s_1_1_SMACv1.0_contig 1276	545	43	22	21	6	340.333	12.243	3	3	8	17	13	17	6.934	3.757	35.963
s_1_1_SMACv1.0_contig 1277	649	44	24	20	10	348.9	23.002	3	3	13	4	18	12	5.966	2.796	36.364
s_1_1_SMACv1.0_contig 1278	814	103	50	53	12	328.5	25.695	8	8	46	16	21	20	8.943	4.251	32.064
s_1_1_SMACv1.0_contig 1279	606	60	21	39	12	329.083	19.771	3	3	19	10	17	16	8.294	2.873	37.459
s_1_1_SMACv1.0_contig 1280	752	110	61	49	22	342.591	24.936	12	12	30	11	31	25	12.049	5.849	39.362
s_1_1_SMACv1.0_contig 1281	687	84	48	36	4	328	5.788	4	4	30	36	25	22	9.408	3.868	33.042
s_1_1_SMACv1.0_contig 1282	514	49	23	26	11	327.182	29.667	4	4	10	9	20	16	8.368	3.975	39.494
s_1_1_SMACv1.0_contig 1283	1307	119	74	45	14	336.714	28.001	9	9	36	33	31	16	7.238	2.742	39.327
s_1_1_SMACv1.0_contig 1284	993	95	46	49	14	335.429	25.919	14	14	18	21	23	20	7.858	4.398	38.369
s_1_1_SMACv1.0_contig 1285	600	48	27	21	3	324	54.577	5	5	9	22	10	13	6.408	2.74	34.667
s_1_1_SMACv1.0_contig 1286	746	135	66	69	19	331.526	30.968	16	16	35	30	34	30	14.475	4.946	36.729
s_1_1_SMACv1.0_contig 1287	782	159	74	85	21	320.619	30.282	13	13	56	31	43	30	16.313	7.728	36.189
s_1_1_SMACv1.0_contig 1288	625	58	25	33	9	327.333	32.67	3	3	21	12	19	13	7.123	2.147	35.2
s_1_1_SMACv1.0_contig 1289	733	100	47	53	16	326.438	32.377	8	8	36	14	35	24	10.572	4.901	35.334
s_1_1_SMACv1.0_contig 1290	805	75	35	40	9	334.778	33.232	5	5	31	12	20	20	8.811	3.959	33.043
s_1_1_SMACv1.0_contig 1291	718	180	102	78	25	336.6	27.11	18	18	50	39	40	41	20.274	9.403	43.315
s_1_1_SMACv1.0_contig 1292	530	63	34	29	11	326.455	16.211	2	2	16	21	21	20	10.008	5.373	33.208
s_1_1_SMACv1.0_contig 1293	2400	262	134	128	51	363.627	206.227	25	25	67	41	85	18	8.991	2.965	38.75
s_1_1_SMACv1.0_contig 1294	537	55	20	35	5	360.4	17.118	8	8	14	15	11	22	8.175	4.799	40.037
s_1_1_SMACv1.0_contig 1295	501	47	21	26	5	323	25.9	4	4	21	6	9	13	8.451	2.447	40.519
s_1_1_SMACv1.0_contig 1296	485	63	30	33	4	328.25	29.634	3	3	24	25	15	16	8.769	3.153	41.031
s_1_1_SMACv1.0_contig 1297	736	65	37	28	12	319.833	27.877	6	6	13	16	19	17	7.363	3.173	36.141
s_1_1_SMACv1.0_contig 1298	549	46	17	29	6	353	33.576	3	3	17	11	10	12	6.401	2.689	35.155
s_1_1_SMACv1.0_contig 1299	895	85	38	47	6	339.5	15.316	11	11	35	12	22	17	8.058	3.467	30.726
s_1_1_SMACv1.0_contig 1300	783	57	23	34	6	319.667	31.175	8	8	12	16	16	16	6.421	2.96	37.292
s_1_1_SMACv1.0_contig 1301	570	52	23	29	6	332.333	12.459	9	9	9	13	14	14	7.554	3.179	33.333
s_1_1_SMACv1.0_contig 1302	523	48	23	25	4	320	19.875	5	5	6	20	11	26	9.855	6.455	43.595
s_1_1_SMACv1.0_contig 1303	639	65	44	21	7	336.714	20.055	7	7	23	12	17	15	8.46	3.905	37.089
s_1_1_SMACv1.0_contig 1304	1268	89	44	45	10	320.9	32.553	11	11	14	27	27	14	7.266	3.181	31.467
s_1_1_SMACv1.0_contig 1305	1233	121	62	59	26	326.269	30.696	9	9	22	24	50	21	9.269	3.808	33.82
s_1_1_SMACv1.0_contig 1306	555	64	31	33	2	356.5	25.5	5	5	35	15	13	26	8.24	5.08	40.36
s_1_1_SMACv1.0_contig 1307	1395	125	72	53	22	332.364	32.08	11	11	34	22	37	16	7.649	2.873	36.559
s_1_1_SMACv1.0_contig 1308	791	68	36	32	10	338.1	17.592	5	5	24	12	22	12	7.472	2.061	37.8
s_1_1_SMACv1.0_contig 1309	653	107	52	55	21	323.429	32.58	10	10	33	10	39	25	14.003	6.054	40.582
s_1_1_SMACv1.0_contig 1310	729	61	30	31	12	333.333	24.888	6	6	18	7	15	15	7.529	3.076	34.979
s_1_1_SMACv1.0_contig 1311	581	75	40	35	14	335.214	28.746	6	6	21	11	29	28	11.776	6.207	33.563
s_1_1_SMACv1.0_contig 1312	552	28	13	15	5	343.6	21.247	3	3	9	0	13	9	5.739	2.155	39.13
s_1_1_SMACv1.0_contig 1313	840	142	75	67	29	330.241	24.804	17	17	32	12	53	29	15.476	7.048	37.738
s_1_1_SMACv1.0_contig 1314	606	46	18	28	6	356	29.642	2	2	24	5	10	11	6.462	2.275	33.333
s_1_1_SMACv1.0_contig 1315	563	84	46	38	5	325.6	14.221	3	3	46	21	17	24	12.007	5.545	34.813
s_1_1_SMACv1.0_contig 1316	635	61	32	29	9	335.778	26.186	4	4	22	12	22	19	7.981	4.34	35.276
s_1_1_SMACv1.0_contig 1317	1726	330	158	172	63	338.825	24.958	29	29	78	64	102	41	15.64	6.451	39.745
s_1_1_SMACv1.0_contig 1318	683	78	40	38	8	329	25.884	7	7	30	16	20	23	9.627	3.62	33.089
s_1_1_SMACv1.0_contig 1319	1154	120	60	60	26	318.808	31.221	10	10	31	14	39	17	9.321	3.658	33.102
s_1_1_SMACv1.0_contig 1320	530	52	26	26	7	312	34.222	2	2	12	22	15	16	7.453	3.904	31.321
s_1_1_SMACv1.0_contig 1321	572	94	35	59	9	326.222	16.578	11	11	33	20	27	27	12.633	6.312	38.112
s_1_1_SMACv1.0_contig 1322	528	117	61	56	21	334.381	33.094	7	7	36	25	38	32	17.195	6.523	46.402
s_1_1_SMACv1.0_contig 1323	501	49	25	24	2	338	12	6	6	16	17	10	12	7.022	2.184	32.934
s_1_1_SMACv1.0_contig 1324	582	53	25	28	5	349.4	22.141	8	8	17	7	17	15	7.66	3.109	37.973
s_1_1_SMACv1.0_contig 1325	921	110	55	55	21	340.476	23.241	5	5	32	22	46	20	10.578	3.794	43.865
s_1_1_SMACv1.0_contig 1326	1248	91	40	51	18	333.389	23.178	11	11	10	20	36	19	6.819	4.016	36.218
s_1_1_SMACv1.0_contig 1327	793	161	82	79	29	331.724	21.989	16	16	44	23	60	36	17.155	7.324	37.201
s_1_1_SMACv1.0_contig 1328	1165	98	44	54	17	336.235	26.282	9	9	28	13	30	20	8.003	3.972	36.309
s_1_1_SMACv1.0_contig 1329	573	70	34	36	6	336.667	29.073	9	9	27	13	14	25	9.307	6.569	31.937
s_1_1_SMACv1.0_contig 1330	1268	236	106	130	50	335.82	28.886	17	17	59	42	90	32	15.245	7.19	43.691
s_1_1_SMACv1.0_contig 1331	613	67	29	38	6	310	26.064	8	8	26	13	17	15	8.142	3.526	35.073
s_1_1_SMACv1.0_contig 1332	690	128	52	76	13	337.154	20.803	10	10	28	51	27	30	15.451	6.549	36.522
s_1_1_SMACv1.0_contig 1333	667	74	36	38	10	337.2	28.899	5	5	34	8	17	17	9.09	3.551	31.634
s_1_1_SMACv1.0_contig 1334	911	128	60	68	26	332.692	32.543	7	7	39	20	51	27	12.061	5.013	41.493
s_1_1_SMACv1.0_contig 1335	2215	202	98	104	47	357.681	204.291	21	21	25	35	68	19	8.426	3.423	38.149
s_1_1_SMACv1.0_contig 1336	708	81	41	40	8	331.125	26.932	8	8	34	13	17	15	8.47	3.19	37.147
s_1_1_SMACv1.0_contig 1337	538	92	47	45	11	339.364	27.874	9	9	26	25	25	26	12.335	5.41	49.071
s_1_1_SMACv1.0_contig 1338	744	60	31	29	8	338.5	28.071	5	5	22	12	15	12	6.211	2.557	37.231
s_1_1_SMACv1.0_contig 1339	906	103	48	55	16	340.812	42.605	12	12	24	20	30	20	10.201	3.793	34.989
s_1_1_SMACv1.0_contig 1340	541	111	62	49	15	330.6	20.81	8	8	29	35	28	29	17.105	7.01	35.12
s_1_1_SMACv1.0_contig 1341	1023	100	47	53	20	317.3	29.99	13	13	18	14	28	18	8.449	3.252	37.732
s_1_1_SMACv1.0_contig 1342	566	54	35	19	5	318.2	40.355	2	2	16	21	17	12	6.753	2.483	39.399
s_1_1_SMACv1.0_contig 1343	1160	125	63	62	23	344.174	23.359	10	10	39	16	36	19	8.646	4.07	40.431
s_1_1_SMACv1.0_contig 1344	540	199	109	90	17	338.824	20.313	8	8	97	50	46	46	28.385	9.063	48.333
s_1_1_SMACv1.0_contig 1345	857	64	38	26	10	337.3	29.591	6	6	13	13	24	15	7.964	3.2	33.606
s_1_1_SMACv1.0_contig 1346	396	77	27	50	2	315	11	10	10	31	21	16	28	11.962	6.781	64.141
s_1_1_SMACv1.0_contig 1347	971	158	67	91	31	323.226	28.199	16	16	34	27	66	28	14.214	6.342	36.251
s_1_1_SMACv1.0_contig 1348	821	81	41	40	11	338	29.471	7	7	20	23	18	18	8.006	3.916	36.906
s_1_1_SMACv1.0_contig 1349	545	42	21	21	4	352.75	24.984	6	6	16	4	8	15	6.185	2.847	37.431
s_1_1_SMACv1.0_contig 1350	751	132	70	62	20	341.45	30.614	13	13	41	25	45	27	13.081	5.971	37.816
s_1_1_SMACv1.0_contig 1351	584	96	44	52	17	331.471	22.526	9	9	31	12	27	28	13.098	6.894	35.959
s_1_1_SMACv1.0_contig 1352	1082	147	71	76	20	331.15	28.935	11	11	53	28	40	20	11.553	4.659	35.86
s_1_1_SMACv1.0_contig 1353	574	37	15	22	5	358	24.397	5	5	4	11	11	12	6.251	2.115	33.101
s_1_1_SMACv1.0_contig 1354	551	4	1	3	0			0	0	2	1	3	3	1.301	0.66	34.846
s_1_1_SMACv1.0_contig 1355	711	79	36	43	6	345.167	12.212	15	15	26	10	25	16	7.961	3.686	40.225
s_1_1_SMACv1.0_contig 1356	562	41	22	19	7	347.143	26.824	0	0	10	15	14	13	7.105	3.122	34.875
s_1_1_SMACv1.0_contig 1357	724	162	75	87	21	328	25.586	13	13	53	39	43	36	18.599	7.828	37.983
s_1_1_SMACv1.0_contig 1358	601	40	21	19	6	334.5	7.544	6	6	11	5	8	11	5.674	2.245	33.943
s_1_1_SMACv1.0_contig 1359	816	120	44	76	13	325.846	30.359	8	8	50	26	34	20	10.83	3.559	34.436
s_1_1_SMACv1.0_contig 1360	917	48	23	25	6	340	22.015	5	5	12	12	10	10	5.012	2.085	33.479
s_1_1_SMACv1.0_contig 1361	945	150	82	68	35	335.343	29.577	12	12	44	12	53	31	13.17	7.159	41.058
s_1_1_SMACv1.0_contig 1362	540	59	30	29	7	318.714	44.81	6	6	19	14	18	19	8.537	4.185	35.37
s_1_1_SMACv1.0_contig 1363	714	93	48	45	16	323.938	28.336	9	9	24	18	23	20	11.263	5.031	35.434
s_1_1_SMACv1.0_contig 1364	770	99	54	45	12	339.167	16.072	13	13	21	24	25	22	11.795	5.197	31.039
s_1_1_SMACv1.0_contig 1365	595	85	41	44	8	316.875	28.073	9	9	26	24	17	23	12.659	4.918	35.462
s_1_1_SMACv1.0_contig 1366	598	66	24	42	5	334.2	27.243	9	9	17	21	21	16	8.117	3.236	32.943
s_1_1_SMACv1.0_contig 1367	935	62	31	31	12	329.417	28.817	6	6	12	11	21	13	6.544	3.759	33.048
s_1_1_SMACv1.0_contig 1368	589	47	18	29	6	357	24.664	4	4	19	6	13	12	6.037	2.761	34.295
s_1_1_SMACv1.0_contig 1369	887	109	55	54	12	324.667	19.006	11	11	38	24	31	24	8.847	4.247	30.214
s_1_1_SMACv1.0_contig 1370	577	52	22	30	6	343.833	21.435	5	5	23	5	14	13	7.385	2.475	39.168
s_1_1_SMACv1.0_contig 1371	616	28	13	15	1	341	0	3	3	8	10	11	16	4.409	3.994	39.123
s_1_1_SMACv1.0_contig 1372	572	35	18	17	5	346	27.181	4	4	8	8	13	10	5.205	2.793	34.266
s_1_1_SMACv1.0_contig 1373	623	70	32	38	9	340.333	18.288	7	7	23	12	25	22	10.252	5.462	34.35
s_1_1_SMACv1.0_contig 1374	627	65	28	37	7	329	25.467	3	3	16	25	20	15	8.043	2.271	41.148
s_1_1_SMACv1.0_contig 1375	983	59	23	36	13	339.692	29.114	4	4	11	9	22	13	6.028	2.704	38.25
s_1_1_SMACv1.0_contig 1376	778	104	57	47	14	323.714	35.808	10	10	33	19	42	27	10.855	5.323	35.219
s_1_1_SMACv1.0_contig 1377	576	82	37	45	12	334	22.094	4	4	28	19	26	23	11.51	4.71	39.757
s_1_1_SMACv1.0_contig 1378	529	16	8	8	2	326	0	1	1	2	7	6	6	3.231	1.463	34.405
s_1_1_SMACv1.0_contig 1379	888	86	40	46	14	334.286	15.768	5	5	23	20	26	18	9.009	3.016	34.91
s_1_1_SMACv1.0_contig 1380	584	132	67	65	17	325.412	27.19	10	10	49	28	44	31	14.503	6.163	64.897
s_1_1_SMACv1.0_contig 1381	650	106	55	51	11	306.364	23.387	6	6	32	39	32	23	13.003	4.881	40.462
s_1_1_SMACv1.0_contig 1382	778	100	55	45	18	337.889	30.351	6	6	19	29	37	25	10.77	5.668	43.445
s_1_1_SMACv1.0_contig 1383	725	50	27	23	9	344.333	22.211	4	4	8	11	21	12	7.211	2.13	37.103
s_1_1_SMACv1.0_contig 1384	788	91	52	39	22	329.273	23.684	9	9	20	8	36	16	9.821	3.575	38.071
s_1_1_SMACv1.0_contig 1385	518	27	15	12	9	321.444	25.945	2	2	2	3	13	12	5.035	3.173	33.205
s_1_1_SMACv1.0_contig 1386	463	44	22	22	4	355.5	30.121	2	2	25	7	18	12	7.037	2.479	37.149
s_1_1_SMACv1.0_contig 1387	536	122	63	59	12	321.167	30.908	6	6	65	20	34	26	16.041	5.529	48.321
s_1_1_SMACv1.0_contig 1388	721	76	38	38	11	334.636	20.592	6	6	11	30	18	19	9.057	3.455	36.338
s_1_1_SMACv1.0_contig 1389	801	82	45	37	11	339.909	22.15	3	3	34	16	24	17	8.498	3.906	33.333
s_1_1_SMACv1.0_contig 1390	613	37	18	19	8	328.125	21.133	4	4	10	3	12	12	5.793	2.927	30.506
s_1_1_SMACv1.0_contig 1391	571	49	21	28	6	339.333	28.952	3	3	14	15	10	15	6.739	2.958	39.229
s_1_1_SMACv1.0_contig 1392	576	47	19	28	8	344.125	41.73	4	4	14	9	17	14	6.109	2.515	36.285
s_1_1_SMACv1.0_contig 1393	617	51	24	27	15	337.333	33.362	3	3	6	6	24	15	7.922	2.672	37.763
s_1_1_SMACv1.0_contig 1394	561	43	25	18	4	343	15.313	4	4	9	18	7	11	6.084	2.504	36.185
s_1_1_SMACv1.0_contig 1395	800	54	31	23	11	333.727	32.622	6	6	6	12	17	14	6.566	2.968	36.625
s_1_1_SMACv1.0_contig 1396	657	72	31	41	4	349.5	29.228	7	7	29	19	14	15	8.416	3.026	39.726
s_1_1_SMACv1.0_contig 1397	502	30	13	17	2	326.5	29.5	5	5	9	7	3	9	4.978	2.179	35.657
s_1_1_SMACv1.0_contig 1398	727	50	23	27	3	363.333	10.842	8	8	15	12	10	13	5.813	3.187	32.875
s_1_1_SMACv1.0_contig 1399	720	111	61	50	18	332.444	12.82	12	12	34	17	37	24	10.981	4.243	63.75
s_1_1_SMACv1.0_contig 1400	507	74	35	39	7	326.286	23.602	9	9	14	27	23	24	9.897	4.504	54.832
s_1_1_SMACv1.0_contig 1401	861	76	45	31	11	323.818	18.741	8	8	16	20	31	12	7.41	2.826	36.353
s_1_1_SMACv1.0_contig 1402	545	53	24	29	4	325.75	18.267	9	9	11	15	13	23	8.87	5.657	36.881
s_1_1_SMACv1.0_contig 1403	531	86	37	49	7	314.571	12.022	7	7	22	36	17	23	11.832	5.253	35.782
s_1_1_SMACv1.0_contig 1404	598	62	33	29	9	340.778	25.715	5	5	21	12	22	17	8.475	3.666	41.806
s_1_1_SMACv1.0_contig 1405	733	56	31	25	10	355.7	19.453	5	5	8	17	18	14	6.754	3.455	35.334
s_1_1_SMACv1.0_contig 1406	815	121	64	57	15	331.933	30.363	12	12	39	26	23	26	12.772	5.477	39.018
s_1_1_SMACv1.0_contig 1407	631	95	51	44	15	326.4	28.791	7	7	31	18	30	29	12.155	6.685	54.834
s_1_1_SMACv1.0_contig 1408	1501	181	86	95	34	331.971	23.421	18	18	35	36	58	27	11.053	4.84	33.311
s_1_1_SMACv1.0_contig 1409	599	61	23	38	6	341.333	22.983	3	3	23	18	19	13	7.401	2.583	42.905
s_1_1_SMACv1.0_contig 1410	625	115	55	60	10	341.1	32.636	8	8	37	42	20	45	13.133	9.233	34.24
s_1_1_SMACv1.0_contig 1411	1018	122	60	62	23	320.174	35.51	12	12	33	17	42	21	9.942	4.256	35.855
s_1_1_SMACv1.0_contig 1412	542	69	36	33	6	317.5	23.25	6	6	32	12	17	21	9.819	5.223	40.406
s_1_1_SMACv1.0_contig 1413	653	73	43	30	7	317.286	22.301	9	9	12	28	17	23	8.985	5.692	30.628
s_1_1_SMACv1.0_contig 1414	515	102	53	49	20	335.3	35.167	6	6	33	14	29	30	15.557	8.28	40
s_1_1_SMACv1.0_contig 1415	592	73	38	35	11	342.909	22.432	4	4	18	23	21	22	10.078	4.482	45.101
s_1_1_SMACv1.0_contig 1416	640	41	17	24	5	303.8	27.301	3	3	14	9	15	9	5.497	1.878	35.625
s_1_1_SMACv1.0_contig 1417	488	59	22	37	6	329.833	23.046	2	2	17	26	16	16	9.143	3.325	31.762
s_1_1_SMACv1.0_contig 1418	647	114	75	39	15	333.933	36.047	5	5	45	29	26	30	13.952	8.158	38.176
s_1_1_SMACv1.0_contig 1419	1001	133	70	63	20	333.7	23.791	9	9	44	27	38	20	11.156	4.297	34.765
s_1_1_SMACv1.0_contig 1420	655	46	20	26	7	309.143	31.009	4	4	7	17	11	10	5.921	2.586	34.198
s_1_1_SMACv1.0_contig 1421	714	131	80	51	15	337.2	32.866	12	12	45	30	37	29	13.598	6.178	36.835
s_1_1_SMACv1.0_contig 1422	538	36	17	19	3	325.667	27.921	1	1	22	4	8	16	5.993	3.322	31.599
s_1_1_SMACv1.0_contig 1423	843	226	117	109	48	334.917	26.345	11	11	72	31	90	44	21.521	9.061	52.076
s_1_1_SMACv1.0_contig 1424	620	84	35	49	9	345.556	23.524	4	4	34	23	29	21	9.005	3.863	42.419
s_1_1_SMACv1.0_contig 1425	541	36	21	15	3	316.667	18.355	2	2	8	16	6	11	5.525	2.571	27.357
s_1_1_SMACv1.0_contig 1426	709	83	45	38	12	333.25	30.293	6	6	29	17	17	20	8.85	4.306	35.825
s_1_1_SMACv1.0_contig 1427	1099	172	90	82	29	338.793	27.163	15	15	54	26	55	30	12.821	7.01	36.488
s_1_1_SMACv1.0_contig 1428	510	50	22	28	6	320.167	18.977	8	8	8	13	13	17	9.331	4.766	42.549
s_1_1_SMACv1.0_contig 1429	724	61	29	32	11	329.818	32.63	5	5	16	11	17	13	6.696	2.506	37.017
s_1_1_SMACv1.0_contig 1430	900	132	77	55	28	344.071	24.321	7	7	38	17	47	23	13.159	5.583	36.778
s_1_1_SMACv1.0_contig 1431	550	54	25	29	3	333.333	41.25	8	8	20	11	14	15	7.331	3.084	35.818
s_1_1_SMACv1.0_contig 1432	578	89	50	39	8	323.75	17.817	7	7	44	14	19	26	11.991	6.35	40.657
s_1_1_SMACv1.0_contig 1433	1280	143	72	71	24	335.083	26.663	10	10	26	45	42	20	9.745	3.756	43.438
s_1_1_SMACv1.0_contig 1434	734	146	78	68	27	333.037	28.04	10	10	49	21	45	29	15.162	6.849	47.956
s_1_1_SMACv1.0_contig 1435	516	26	13	13	4	367.75	19.344	6	6	3	3	13	9	4.769	1.666	35.271
s_1_1_SMACv1.0_contig 1436	865	58	28	30	10	352.6	11.482	8	8	8	13	19	12	6.2	2.528	37.919
s_1_1_SMACv1.0_contig 1437	811	73	34	39	11	315.364	25.028	7	7	16	18	19	19	8.175	4.054	38.594
s_1_1_SMACv1.0_contig 1438	464	30	14	16	2	330.5	8.5	1	1	12	8	10	13	6.474	2.71	31.897
s_1_1_SMACv1.0_contig 1439	939	113	65	48	18	330.5	33.861	5	5	52	11	35	26	9.744	4.401	35.783
s_1_1_SMACv1.0_contig 1440	1107	150	86	64	23	343.348	20.597	10	10	47	31	40	23	11.061	3.834	34.959
s_1_1_SMACv1.0_contig 1441	513	80	37	43	16	334.938	21.542	7	7	21	12	33	27	13.212	5.99	42.885
s_1_1_SMACv1.0_contig 1442	614	109	61	48	13	333.154	27.445	5	5	49	23	29	33	11.865	8.173	44.788
s_1_1_SMACv1.0_contig 1443	822	83	39	44	14	337.786	20.898	5	5	13	28	29	15	9.009	2.9	39.173
s_1_1_SMACv1.0_contig 1444	516	32	20	12	5	326.8	18.258	3	3	13	2	9	12	5.378	2.391	30.233
s_1_1_SMACv1.0_contig 1445	517	59	36	23	7	316.857	41.139	4	6	12	19	15	18	9.557	4.889	36.364
s_1_1_SMACv1.0_contig 1446	1012	132	72	60	25	320.24	35.135	14	14	28	24	44	18	11.405	3.35	30.336
s_1_1_SMACv1.0_contig 1447	767	133	70	63	18	324.833	28.572	7	7	51	31	42	33	13.458	6.406	30.378
s_1_1_SMACv1.0_contig 1448	1766	340	190	150	58	333.19	26.615	38	38	67	75	106	33	16.028	7.201	36.297
s_1_1_SMACv1.0_contig 1449	651	52	26	26	9	337.556	26.517	5	5	15	6	18	18	7.668	4.076	34.869
s_1_1_SMACv1.0_contig 1450	1040	131	68	63	19	327.526	32.7	16	16	33	23	43	19	10.496	4.108	32.115
s_1_1_SMACv1.0_contig 1451	558	77	42	35	9	333.778	30.158	8	8	23	20	15	17	10.378	3.758	38.71
s_1_1_SMACv1.0_contig 1452	545	37	17	20	3	318.333	14.337	3	3	11	13	8	11	5.495	2.003	33.394
s_1_1_SMACv1.0_contig 1453	764	69	40	29	11	332.818	29.235	4	4	17	22	25	17	7.323	3.758	39.267
s_1_1_SMACv1.0_contig 1454	687	66	31	35	14	331.071	17.161	3	3	16	16	27	17	8.994	3.782	37.991
s_1_1_SMACv1.0_contig 1455	847	119	58	61	23	335.913	30.313	10	10	37	13	45	24	11.812	4.431	34.593
s_1_1_SMACv1.0_contig 1456	751	69	31	38	7	311.286	17.202	7	7	17	23	15	14	7.581	2.565	37.55
s_1_1_SMACv1.0_contig 1457	772	74	34	40	17	333.118	31.985	3	3	20	14	25	19	7.82	3.592	37.824
s_1_1_SMACv1.0_contig 1458	536	45	24	21	7	323.571	34.429	6	6	7	12	16	13	7.09	2.641	37.313
s_1_1_SMACv1.0_contig 1459	824	88	40	48	11	336.455	39.188	8	8	16	30	25	20	9.941	4.771	32.524
s_1_1_SMACv1.0_contig 1460	950	125	56	69	22	333.955	27.127	13	13	20	34	32	26	10.607	5.586	42.105
s_1_1_SMACv1.0_contig 1461	744	149	57	92	25	341.8	28.679	7	7	40	44	35	29	15.759	6.76	37.634
s_1_1_SMACv1.0_contig 1462	1183	126	53	73	26	337.654	26.936	11	11	17	32	38	26	9.281	4.51	42.434
s_1_1_SMACv1.0_contig 1463	888	85	41	44	15	338.133	26.88	6	6	21	21	29	18	7.9	3.566	37.387
s_1_1_SMACv1.0_contig 1464	629	72	34	38	3	323.667	23.613	8	8	28	22	23	21	8.598	4.37	32.273
s_1_1_SMACv1.0_contig 1465	553	44	22	22	9	331.778	17.725	3	3	10	10	15	14	6.767	2.969	35.262
s_1_1_SMACv1.0_contig 1466	476	20	11	9	1	336	0	1	1	7	8	4	10	3.223	2.716	32.143
s_1_1_SMACv1.0_contig 1467	636	82	42	40	13	323.615	28.229	10	10	21	14	23	32	10.664	7.352	33.491
s_1_1_SMACv1.0_contig 1468	556	41	27	14	4	332.25	18.226	2	2	22	6	13	12	6.604	2.832	40.108
s_1_1_SMACv1.0_contig 1469	597	80	48	32	3	307	7.483	9	9	18	36	17	31	9.549	8.855	39.531
s_1_1_SMACv1.0_contig 1470	729	56	28	28	11	338.545	9.228	6	6	17	4	24	14	7.296	3.051	34.979
s_1_1_SMACv1.0_contig 1471	1089	141	62	79	23	330.652	27.596	9	9	45	30	36	20	9.774	4.772	36.455
s_1_1_SMACv1.0_contig 1472	659	64	28	36	13	319.077	23.815	9	9	12	8	23	17	8.792	4.212	33.839
s_1_1_SMACv1.0_contig 1473	755	118	77	41	16	338.812	31.449	11	11	43	19	31	21	12.266	4.187	42.119
s_1_1_SMACv1.0_contig 1474	974	100	51	49	24	345.292	24.984	6	6	15	23	36	19	9.449	4.783	38.09
s_1_1_SMACv1.0_contig 1475	505	42	21	21	6	352.333	22.595	3	3	14	8	14	14	7.743	3.442	39.802
s_1_1_SMACv1.0_contig 1476	568	59	23	36	7	330.571	33.831	3	3	13	25	10	17	7.822	3.508	39.261
s_1_1_SMACv1.0_contig 1477	649	171	82	89	38	326.079	31.347	8	8	51	28	68	35	18.128	7.063	66.718
s_1_1_SMACv1.0_contig 1478	830	95	50	45	16	323.75	32.824	5	5	23	29	24	19	9.559	3.592	38.193
s_1_1_SMACv1.0_contig 1479	1050	90	50	40	18	335.111	27.059	8	8	15	20	30	16	8.077	3.03	37.714
s_1_1_SMACv1.0_contig 1480	1121	152	86	66	28	338.107	22.628	8	8	49	27	51	22	11.458	4.328	41.481
s_1_1_SMACv1.0_contig 1481	1054	89	36	53	13	322	24.788	9	9	16	26	25	20	7.114	3.148	32.258
s_1_1_SMACv1.0_contig 1482	803	91	47	44	18	335	24.574	12	12	10	17	28	23	10.447	5.038	41.096
s_1_1_SMACv1.0_contig 1483	784	105	56	49	19	314.158	30.228	11	11	7	37	38	19	10.902	4.031	50.128
s_1_1_SMACv1.0_contig 1484	801	58	34	24	9	320.556	25.906	6	6	8	18	17	14	6.499	2.499	34.207
s_1_1_SMACv1.0_contig 1485	663	87	34	53	14	339.857	34.313	10	10	27	12	25	20	10.578	4.878	29.713
s_1_1_SMACv1.0_contig 1486	747	103	48	55	11	328.636	29.77	7	7	41	19	28	22	12.395	6.785	37.483
s_1_1_SMACv1.0_contig 1487	681	203	119	84	25	334.28	31.406	11	11	50	79	78	38	19.04	9.544	67.988
s_1_1_SMACv1.0_contig 1488	601	109	58	51	17	341.176	28.892	5	5	46	18	34	25	14.323	4.555	39.601
s_1_1_SMACv1.0_contig 1489	744	53	29	24	9	338.778	22.285	9	9	5	11	17	14	6.579	3.053	37.903
s_1_1_SMACv1.0_contig 1490	852	69	36	33	7	315.571	25.889	7	7	17	22	17	13	6.608	2.755	36.737
s_1_1_SMACv1.0_contig 1491	1045	94	39	55	23	327.826	22.573	8	8	17	10	34	17	8.878	3.617	35.311
s_1_1_SMACv1.0_contig 1492	514	23	11	12	2	271	11	4	4	3	7	3	8	4.126	1.728	27.237
s_1_1_SMACv1.0_contig 1493	532	43	17	26	5	332.6	17.591	2	2	20	6	9	15	6.44	3.048	34.023
s_1_1_SMACv1.0_contig 1494	832	107	46	61	14	328.071	24.371	4	4	52	19	33	17	9.339	3.492	35.337
s_1_1_SMACv1.0_contig 1495	557	37	10	27	7	325.143	36.057	2	2	2	17	10	12	5.792	3.111	38.42
s_1_1_SMACv1.0_contig 1496	512	131	81	50	7	304.571	35.193	6	6	61	41	22	36	17.359	8.826	50.977
s_1_1_SMACv1.0_contig 1497	653	82	46	36	10	331.8	13.006	10	10	28	12	20	23	10.747	5.759	32.772
s_1_1_SMACv1.0_contig 1498	779	99	48	51	13	340.385	30.004	7	7	32	22	32	20	10.053	3.653	36.585
s_1_1_SMACv1.0_contig 1499	568	49	29	20	7	309.143	34.618	6	6	17	4	15	15	8.489	3.888	33.627
s_1_1_SMACv1.0_contig 1500	644	83	39	44	17	337.235	29.273	4	4	10	31	30	17	10.852	3.207	37.112
s_1_1_SMACv1.0_contig 1501	683	73	31	42	11	320.273	40.852	11	11	20	9	18	20	9.261	4.564	31.186
s_1_1_SMACv1.0_contig 1502	657	32	15	17	3	334.667	13.719	4	4	10	5	9	15	5.4	3.795	33.638
s_1_1_SMACv1.0_contig 1503	793	53	28	25	4	332	45.722	7	7	15	13	13	14	6.168	2.312	36.444
s_1_1_SMACv1.0_contig 1504	981	110	61	49	26	332.308	22.732	7	7	20	22	42	20	9.577	3.796	36.595
s_1_1_SMACv1.0_contig 1505	1096	134	69	65	23	331.739	27.312	12	12	36	24	42	22	11.112	4.71	44.891
s_1_1_SMACv1.0_contig 1506	530	69	22	47	8	331.25	22.609	4	4	27	17	20	21	10.158	5.418	38.302
s_1_1_SMACv1.0_contig 1507	726	132	60	72	9	331	35.217	8	8	62	33	34	29	13.559	5.853	33.058
s_1_1_SMACv1.0_contig 1508	531	37	17	20	4	342.75	18.807	2	2	17	7	11	10	5.218	2.131	36.347
s_1_1_SMACv1.0_contig 1509	636	70	39	31	16	325.562	25.937	6	6	16	8	25	22	10.881	6.195	39.465
s_1_1_SMACv1.0_contig 1510	931	115	62	53	11	317.455	32.205	11	11	35	36	23	22	9.246	4.526	40.602
s_1_1_SMACv1.0_contig 1511	677	73	40	33	6	308.667	26.961	4	4	24	26	27	19	8.84	5.318	29.985
s_1_1_SMACv1.0_contig 1512	874	109	41	68	19	330.421	30.536	11	11	35	13	36	22	10.164	4.529	35.812
s_1_1_SMACv1.0_contig 1513	796	56	31	25	11	327	15.62	5	5	13	10	19	14	6.08	3.046	34.925
s_1_1_SMACv1.0_contig 1514	689	69	36	33	6	342.667	30.483	8	8	24	11	22	17	9.269	3.646	40.784
s_1_1_SMACv1.0_contig 1515	876	104	56	48	12	325.083	23.103	15	15	32	17	22	19	9.316	4.126	36.872
s_1_1_SMACv1.0_contig 1516	623	60	31	29	9	317.889	31.522	7	7	16	12	15	15	8.022	3.215	34.831
s_1_1_SMACv1.0_contig 1517	632	55	25	30	11	334.818	24.022	1	1	14	17	20	15	6.568	3.24	42.563
s_1_1_SMACv1.0_contig 1518	688	75	37	38	10	334.5	29.354	13	13	14	14	27	16	9.278	4.185	36.483
s_1_1_SMACv1.0_contig 1519	751	61	28	33	8	333.125	30.35	10	10	12	12	15	13	7.224	2.585	37.15
s_1_1_SMACv1.0_contig 1520	678	87	35	52	6	346.167	25.648	8	8	32	25	30	16	9.646	3.482	33.776
s_1_1_SMACv1.0_contig 1521	815	135	71	64	15	330.8	28.091	12	12	38	40	43	26	14.315	5.985	37.914
s_1_1_SMACv1.0_contig 1522	733	77	36	41	5	335.2	18.476	9	9	27	18	17	16	7.87	3.784	33.834
s_1_1_SMACv1.0_contig 1523	916	84	39	45	11	354.818	26.778	8	8	31	13	20	14	7.356	2.929	40.393
s_1_1_SMACv1.0_contig 1524	1104	154	87	67	26	343.269	31.606	12	12	47	24	38	28	13.062	5.22	33.062
s_1_1_SMACv1.0_contig 1525	959	107	59	48	18	324.889	30.791	8	8	34	19	33	20	9.435	4.571	39.416
s_1_1_SMACv1.0_contig 1526	544	35	25	10	4	308.25	26.328	3	3	4	16	8	14	5.375	3.713	34.191
s_1_1_SMACv1.0_contig 1527	579	112	54	58	15	336.133	22.759	5	5	47	19	31	29	16.756	5.76	35.924
s_1_1_SMACv1.0_contig 1528	716	65	31	34	10	334.3	16.377	6	6	17	15	21	14	7.186	2.833	31.844
s_1_1_SMACv1.0_contig 1529	604	33	14	19	6	321.667	34.538	1	1	16	1	12	9	5.265	2.607	29.47
s_1_1_SMACv1.0_contig 1530	518	83	44	39	13	328.385	21.9	7	7	18	24	19	22	13.386	5.415	37.259
s_1_1_SMACv1.0_contig 1531	606	50	28	22	7	335.857	9.877	8	8	18	2	14	14	7.903	3.088	34.488
s_1_1_SMACv1.0_contig 1532	1398	165	76	89	28	336.607	23.039	11	11	45	35	58	26	10.449	4.319	41.845
s_1_1_SMACv1.0_contig 1533	647	79	39	40	10	302.6	38.8	4	4	28	21	17	19	9.856	5.027	41.577
s_1_1_SMACv1.0_contig 1534	730	45	23	22	6	335.5	29.534	6	6	11	9	8	11	5.927	2.199	37.397
s_1_1_SMACv1.0_contig 1535	804	65	37	28	4	298.25	23.306	8	8	26	14	14	13	6.427	2.566	34.701
s_1_1_SMACv1.0_contig 1536	541	41	23	18	8	335.5	21.483	5	5	5	8	19	19	8.072	4.156	35.86
s_1_1_SMACv1.0_contig 1537	527	47	20	27	6	308.667	22.713	4	4	13	14	11	13	7.395	2.667	27.894
s_1_1_SMACv1.0_contig 1538	516	38	19	19	4	327.75	14.359	1	1	9	18	16	11	5.921	2.32	39.922
s_1_1_SMACv1.0_contig 1539	573	40	26	14	2	310.5	11.5	9	9	4	14	6	13	6.07	2.504	34.38
s_1_1_SMACv1.0_contig 1540	735	114	49	65	10	337.4	23.062	13	13	36	29	41	23	12.369	3.729	37.143
s_1_1_SMACv1.0_contig 1541	695	77	41	36	13	327.923	21.939	7	7	22	14	23	19	9.446	3.514	40.432
s_1_1_SMACv1.0_contig 1542	1034	113	50	63	20	343.3	30.254	11	11	40	10	38	17	9.503	3.229	45.164
s_1_1_SMACv1.0_contig 1543	846	77	43	34	13	339	21.909	8	8	24	9	25	19	8.621	3.778	34.634
s_1_1_SMACv1.0_contig 1544	574	53	31	22	4	325.25	14.737	5	5	26	6	17	19	7.484	3.967	32.23
s_1_1_SMACv1.0_contig 1545	604	115	57	58	18	327.333	31.575	9	9	38	22	33	24	14.656	5.639	39.735
s_1_1_SMACv1.0_contig 1546	726	48	23	25	13	319.308	34.361	1	1	12	6	16	11	6.412	2.265	35.537
s_1_1_SMACv1.0_contig 1547	581	95	40	55	14	329.429	30.383	13	13	21	20	34	20	10.764	4.019	67.814
s_1_1_SMACv1.0_contig 1548	548	44	27	17	3	320.667	22.171	3	3	9	21	9	14	6.865	2.359	37.774
s_1_1_SMACv1.0_contig 1549	909	67	41	26	9	332	17.333	6	6	9	24	21	13	6.682	2.59	33.883
s_1_1_SMACv1.0_contig 1550	1146	72	40	32	13	324.231	27.613	8	8	15	14	23	13	5.841	3.669	36.213
s_1_1_SMACv1.0_contig 1551	552	75	39	36	8	309	28.373	11	11	25	12	16	21	11.221	4.957	36.232
s_1_1_SMACv1.0_contig 1552	621	38	18	20	9	336.667	31.223	2	2	4	11	17	10	5.868	2.042	35.266
s_1_1_SMACv1.0_contig 1553	589	56	29	27	5	336	35.378	7	7	11	20	14	18	8.178	3.63	37.182
s_1_1_SMACv1.0_contig 1554	925	92	37	55	16	333.438	27.987	6	6	28	18	32	15	8.293	2.811	37.405
s_1_1_SMACv1.0_contig 1555	1074	190	90	100	35	328.429	27.192	13	13	58	32	59	25	13.831	4.883	47.858
s_1_1_SMACv1.0_contig 1556	611	135	57	78	13	328.923	14.21	9	9	58	33	34	29	15.47	6.153	39.771
s_1_1_SMACv1.0_contig 1557	1114	100	47	53	18	328	26.75	13	13	25	11	29	23	7.537	3.789	34.919
s_1_1_SMACv1.0_contig 1558	1287	129	55	74	27	337.037	26.858	12	12	38	9	48	17	8.806	3.137	39.782
s_1_1_SMACv1.0_contig 1559	701	121	78	43	10	343.2	18.416	6	6	42	45	30	29	12.99	6.335	40.942
s_1_1_SMACv1.0_contig 1560	883	92	41	51	15	322.8	30.257	5	5	17	30	34	21	7.745	6.912	65.006
s_1_1_SMACv1.0_contig 1561	1099	148	70	78	23	331.609	27.226	10	10	17	63	40	29	10.622	5.798	41.492
s_1_1_SMACv1.0_contig 1562	595	36	20	16	5	351.8	15.942	3	3	5	12	15	11	5.904	2.366	29.244
s_1_1_SMACv1.0_contig 1563	534	79	47	32	3	348	11.576	10	10	17	34	13	22	12.813	5.045	36.142
s_1_1_SMACv1.0_contig 1564	1238	157	73	84	22	327.636	31.032	18	18	46	28	40	24	10.355	4.475	32.795
s_1_1_SMACv1.0_contig 1565	518	50	22	28	6	339.333	13.864	3	3	13	17	22	17	8.193	4.098	33.784
s_1_1_SMACv1.0_contig 1566	649	109	51	58	25	329.72	30.075	10	10	32	5	33	35	14.401	8.543	34.977
s_1_1_SMACv1.0_contig 1567	770	85	41	44	9	317.889	29.894	7	7	24	29	18	18	7.865	3.349	35.714
s_1_1_SMACv1.0_contig 1568	788	95	47	48	18	341.667	20.488	5	5	40	9	32	22	9.43	4.624	38.579
s_1_1_SMACv1.0_contig 1569	525	36	18	18	4	330.25	28.092	4	4	11	8	15	11	5.865	2.434	37.905
s_1_1_SMACv1.0_contig 1570	615	66	35	31	9	319.778	40.732	6	6	14	21	18	27	8.642	5.854	34.309
s_1_1_SMACv1.0_contig 1571	544	60	33	27	9	312.333	26.537	6	6	21	7	16	20	10.156	4.339	35.846
s_1_1_SMACv1.0_contig 1572	579	44	19	25	0			4	4	21	15	4	14	6.164	3.638	38.342
s_1_1_SMACv1.0_contig 1573	725	130	65	65	25	335.48	24.214	14	14	43	8	44	36	14.913	8.132	39.034
s_1_1_SMACv1.0_contig 1574	528	67	31	36	6	328.167	22.799	7	7	35	5	25	18	9.676	3.644	40.909
s_1_1_SMACv1.0_contig 1575	1240	137	57	80	22	325.955	32.347	15	15	35	26	45	19	9.022	3.641	37.661
s_1_1_SMACv1.0_contig 1576	754	91	52	39	14	344.786	40.545	8	8	31	16	32	18	9.187	4.301	33.024
s_1_1_SMACv1.0_contig 1577	629	37	14	23	6	316.333	27.518	4	4	3	13	10	11	5.506	2.784	33.227
s_1_1_SMACv1.0_contig 1578	505	47	20	27	5	327.6	15.844	3	3	18	13	6	13	7.533	3.561	34.653
s_1_1_SMACv1.0_contig 1579	601	45	27	18	6	330.667	11.455	2	2	12	15	16	17	6.621	3.451	37.604
s_1_1_SMACv1.0_contig 1580	723	90	48	42	13	331.462	20.835	7	7	20	27	24	26	11.01	5.806	34.578
s_1_1_SMACv1.0_contig 1581	638	106	70	36	15	323.733	34.876	8	8	37	22	27	25	12.813	5.364	36.991
s_1_1_SMACv1.0_contig 1582	626	60	28	32	8	323	19.144	2	2	19	16	25	17	9.527	3.364	41.534
s_1_1_SMACv1.0_contig 1583	985	163	84	79	31	340.419	33.793	12	12	44	30	54	26	13.68	5.114	34.924
s_1_1_SMACv1.0_contig 1584	809	105	51	54	11	351.364	27.897	13	13	29	27	24	24	10.158	4.986	33.993
s_1_1_SMACv1.0_contig 1585	557	68	34	34	10	321.1	28.126	5	5	22	16	18	17	9.104	3.302	45.063
s_1_1_SMACv1.0_contig 1586	561	96	50	46	14	337.786	24.285	12	12	28	15	28	28	14.44	6.872	39.929
s_1_1_SMACv1.0_contig 1587	554	43	23	20	7	351	29.747	4	4	13	6	13	13	6.904	2.763	36.101
s_1_1_SMACv1.0_contig 1588	1001	173	90	83	28	334.571	23.089	13	13	49	38	51	26	13.938	5.433	39.061
s_1_1_SMACv1.0_contig 1589	538	71	39	32	9	337.778	14.808	10	10	20	11	20	28	11.243	6.861	35.502
s_1_1_SMACv1.0_contig 1590	514	32	14	18	6	317.833	15.093	3	3	10	3	12	10	5.586	2.407	34.825
s_1_1_SMACv1.0_contig 1591	590	69	31	38	8	313.5	28.182	9	9	20	14	20	15	10.131	2.92	33.22
s_1_1_SMACv1.0_contig 1592	764	82	37	45	10	333.6	22.137	5	5	40	11	20	15	8.292	3.28	40.576
s_1_1_SMACv1.0_contig 1593	633	84	42	42	13	311.154	33.679	6	6	31	15	21	21	10.066	4.219	34.597
s_1_1_SMACv1.0_contig 1594	806	76	42	34	18	328.167	33.135	6	6	8	20	24	14	8.542	3.351	35.608
s_1_1_SMACv1.0_contig 1595	548	59	29	30	6	307.5	28.617	8	8	14	15	24	20	8.679	3.853	37.044
s_1_1_SMACv1.0_contig 1596	997	114	56	58	27	341.481	29.06	8	8	33	11	42	20	9.62	4.065	43.631
s_1_1_SMACv1.0_contig 1597	1179	210	111	99	27	339.111	26.42	20	20	73	41	71	33	13.77	6.617	35.963
s_1_1_SMACv1.0_contig 1598	628	89	37	52	12	337.167	34.852	6	6	36	16	25	25	10.729	5.303	34.713
s_1_1_SMACv1.0_contig 1599	706	60	25	35	9	328.444	33.404	8	8	11	12	20	19	8.159	3.799	32.72
s_1_1_SMACv1.0_contig 1600	475	69	32	37	8	326.875	11.931	4	4	12	31	19	20	11.674	6.236	34.316
s_1_1_SMACv1.0_contig 1601	803	109	49	60	18	317.944	24.264	13	13	17	30	31	26	11.516	6.835	37.484
s_1_1_SMACv1.0_contig 1602	821	139	71	68	20	322.5	35.2	18	18	44	15	42	31	14.406	7.335	35.688
s_1_1_SMACv1.0_contig 1603	515	46	25	21	6	294.833	22.579	4	4	16	10	10	15	7.219	3.717	40.971
s_1_1_SMACv1.0_contig 1604	543	32	17	15	4	333.25	14.839	3	3	8	10	9	10	4.912	2.378	40.884
s_1_1_SMACv1.0_contig 1605	621	54	33	21	9	337.444	27.015	5	5	10	13	16	16	7.217	2.937	37.037
s_1_1_SMACv1.0_contig 1606	1421	173	72	101	40	337.15	25.04	15	15	27	32	67	21	11.319	4.679	38.846
s_1_1_SMACv1.0_contig 1607	549	63	35	28	11	335.182	15.171	1	1	25	13	20	21	9.474	3.507	41.712
s_1_1_SMACv1.0_contig 1608	705	47	33	14	2	288.5	23.5	3	3	15	20	8	18	4.986	4.476	37.589
s_1_1_SMACv1.0_contig 1609	556	62	28	34	11	329.091	23.283	5	5	20	10	15	15	9.486	3.421	33.813
s_1_1_SMACv1.0_contig 1610	907	112	46	66	12	324	29.098	12	12	45	18	31	22	9.558	4.166	30.65
s_1_1_SMACv1.0_contig 1611	559	50	22	28	6	330.667	19.422	4	4	20	10	12	14	6.841	2.812	37.03
s_1_1_SMACv1.0_contig 1612	743	99	63	36	15	334	22.343	6	6	32	24	29	16	9.867	3.577	33.513
s_1_1_SMACv1.0_contig 1613	663	55	29	26	6	345.5	26.887	8	8	11	16	12	13	6.81	2.649	37.255
s_1_1_SMACv1.0_contig 1614	522	32	15	17	6	315	8.775	2	2	11	5	12	10	5.368	2.423	36.015
s_1_1_SMACv1.0_contig 1615	564	67	36	31	7	327.429	7.594	5	5	26	17	17	22	9.044	4.663	40.78
s_1_1_SMACv1.0_contig 1616	691	83	45	38	15	327.6	33.903	8	8	27	9	31	16	9.899	3.927	41.968
s_1_1_SMACv1.0_contig 1617	588	31	21	10	4	331	20.7	2	2	12	7	6	9	4.303	1.886	34.694
s_1_1_SMACv1.0_contig 1618	552	150	48	102	22	330.045	33.688	9	9	56	30	44	33	17.906	7.299	61.232
s_1_1_SMACv1.0_contig 1619	793	116	52	64	24	332.458	32.051	15	15	21	17	45	25	11.797	5.102	39.47
s_1_1_SMACv1.0_contig 1620	621	107	56	51	13	326.538	25.895	12	12	35	20	35	24	13.172	5.294	36.715
s_1_1_SMACv1.0_contig 1621	834	107	44	63	15	332.667	29.988	11	11	29	22	29	22	10.893	4.295	30.815
s_1_1_SMACv1.0_contig 1622	507	49	29	20	3	344	18.833	5	5	22	9	8	16	7.613	3.262	32.15
s_1_1_SMACv1.0_contig 1623	697	87	34	53	13	347.077	38.243	4	4	39	13	24	22	10.042	4.47	33.859
s_1_1_SMACv1.0_contig 1624	697	59	30	29	12	333.667	21.332	8	8	8	10	20	15	8.069	3.724	40.316
s_1_1_SMACv1.0_contig 1625	577	48	20	28	6	323.167	25.758	5	5	10	16	13	16	6.451	3.596	37.088
s_1_1_SMACv1.0_contig 1626	624	42	24	18	4	316.75	44.617	4	4	15	9	9	15	5.54	3.777	34.615
s_1_1_SMACv1.0_contig 1627	779	78	36	42	11	336.364	26.074	6	6	17	25	28	17	8.055	3.496	38.896
s_1_1_SMACv1.0_contig 1628	555	39	20	19	1	323	0	3	3	16	12	10	12	6.032	2.668	32.793
s_1_1_SMACv1.0_contig 1629	755	76	48	28	6	304.833	36.283	13	13	21	15	21	23	8.683	4.858	40.397
s_1_1_SMACv1.0_contig 1630	515	42	28	14	3	312.333	7.542	5	5	8	17	9	17	6.664	3.646	33.981
s_1_1_SMACv1.0_contig 1631	780	74	35	39	16	327.25	26.238	7	7	9	18	26	21	8.485	3.889	40
s_1_1_SMACv1.0_contig 1632	1342	116	49	67	25	337.72	32.175	12	12	13	28	30	19	7.668	4.048	35.618
s_1_1_SMACv1.0_contig 1633	627	38	21	17	3	334	30.735	4	4	2	18	10	14	6.472	3.146	30.622
s_1_1_SMACv1.0_contig 1634	1145	117	50	67	30	327.067	20.468	7	7	17	26	45	15	8.701	2.927	37.904
s_1_1_SMACv1.0_contig 1635	510	47	19	28	3	336.333	14.522	2	2	16	20	13	19	7.984	5.966	31.176
s_1_1_SMACv1.0_contig 1636	529	47	33	14	3	343.667	17.783	4	4	17	14	11	16	7.741	4.3	31.191
s_1_1_SMACv1.0_contig 1637	693	78	33	45	9	339.111	36.306	7	7	26	18	23	17	9.333	4.157	34.632
s_1_1_SMACv1.0_contig 1638	535	41	18	23	4	306.25	34.412	3	3	13	11	16	15	7.079	3.486	30.654
s_1_1_SMACv1.0_contig 1639	823	126	57	69	13	328.077	22.469	8	8	49	32	33	39	12.272	9.822	37.789
s_1_1_SMACv1.0_contig 1640	1092	176	82	94	29	322.621	33.663	15	15	65	16	50	32	14.097	6.38	36.538
s_1_1_SMACv1.0_contig 1641	1141	103	47	56	21	331.429	30.172	8	8	25	18	40	18	8.437	3.37	35.232
s_1_1_SMACv1.0_contig 1642	626	74	45	29	10	331.9	32.182	7	7	27	11	30	18	10.364	3.74	41.374
s_1_1_SMACv1.0_contig 1643	514	44	28	16	2	324.5	37.5	3	3	14	20	6	11	6.247	2.423	35.019
s_1_1_SMACv1.0_contig 1644	780	66	33	33	6	322	25.403	3	3	30	15	19	14	6.869	2.487	38.077
s_1_1_SMACv1.0_contig 1645	730	81	44	37	12	327	25.087	6	6	26	18	24	19	8.99	3.371	38.904
s_1_1_SMACv1.0_contig 1646	746	85	48	37	9	326.333	12.719	10	10	27	18	20	26	9.286	5.639	43.164
s_1_1_SMACv1.0_contig 1647	1027	88	46	42	8	331.375	41.659	18	18	21	13	19	19	7.483	3.401	30.38
s_1_1_SMACv1.0_contig 1648	546	61	33	28	3	324.333	5.558	3	3	38	10	18	17	7.381	3.116	33.333
s_1_1_SMACv1.0_contig 1649	573	51	22	29	3	331	22.686	9	9	17	9	11	17	7.778	4.4	32.81
s_1_1_SMACv1.0_contig 1650	1296	161	85	76	29	322.448	27.358	11	11	48	28	59	19	10.202	3.255	43.133
s_1_1_SMACv1.0_contig 1651	639	85	42	43	17	327.706	29.287	4	4	19	23	27	21	11.097	4.479	44.914
s_1_1_SMACv1.0_contig 1652	729	47	21	26	14	335.214	27.198	1	1	11	4	25	14	6.487	3.244	37.586
s_1_1_SMACv1.0_contig 1653	697	85	27	58	14	330.643	22.714	4	4	34	14	26	20	9.693	4.728	52.367
s_1_1_SMACv1.0_contig 1654	568	38	24	14	6	346.5	23.265	4	4	16	1	13	15	5.836	3.646	33.099
s_1_1_SMACv1.0_contig 1655	1228	97	47	50	17	327.882	33.111	12	12	19	17	31	16	7.486	3.133	38.681
s_1_1_SMACv1.0_contig 1656	663	79	41	38	8	311.875	27.356	3	3	24	30	29	24	10.128	5.118	36.35
s_1_1_SMACv1.0_contig 1657	628	51	28	23	11	342.727	26.014	4	4	17	4	25	15	6.626	3.506	41.561
s_1_1_SMACv1.0_contig 1658	799	66	42	24	7	343.571	21.111	4	4	29	12	16	12	7.019	2.231	31.289
s_1_1_SMACv1.0_contig 1659	930	67	33	34	16	320.562	24.287	6	6	3	18	25	18	7.508	4.614	36.559
s_1_1_SMACv1.0_contig 1660	772	132	62	70	15	342.467	24.448	15	15	40	30	43	23	12.926	4.975	38.86
s_1_1_SMACv1.0_contig 1661	1143	99	51	48	16	336.562	26.211	11	11	29	14	30	21	7.218	3.164	30.796
s_1_1_SMACv1.0_contig 1662	794	100	44	56	13	337.077	23.928	4	4	31	30	29	20	9.285	4.169	38.035
s_1_1_SMACv1.0_contig 1663	822	90	41	49	16	327.062	28.07	5	5	31	15	34	19	9.259	4.159	36.131
s_1_1_SMACv1.0_contig 1664	601	92	49	43	12	318	31.284	7	7	33	21	25	19	11.389	3.503	37.77
s_1_1_SMACv1.0_contig 1665	579	116	55	61	19	342.263	32.402	11	11	38	18	39	33	17.13	7.225	37.478
s_1_1_SMACv1.0_contig 1666	587	79	46	33	15	333	24.935	6	6	24	11	28	25	12.022	5.528	33.39
s_1_1_SMACv1.0_contig 1667	525	117	75	42	15	328.867	22.491	9	9	42	25	35	39	16.238	9.207	50.095
s_1_1_SMACv1.0_contig 1668	579	68	38	30	6	311.333	39.237	7	7	26	12	15	23	10.748	4.399	34.542
s_1_1_SMACv1.0_contig 1669	1189	179	95	84	29	341.138	24.844	13	13	42	53	51	24	11.632	4.153	41.716
s_1_1_SMACv1.0_contig 1670	702	48	19	29	8	330.25	25.257	5	5	16	4	17	17	6.802	4.196	36.325
s_1_1_SMACv1.0_contig 1671	661	93	40	53	8	327.625	27.735	13	13	26	25	19	25	11.189	6.254	34.644
s_1_1_SMACv1.0_contig 1672	651	91	49	42	19	323.211	25.731	6	6	23	18	30	19	10.057	4.671	49.002
s_1_1_SMACv1.0_contig 1673	752	129	61	68	17	329.588	25.59	8	8	46	31	31	28	14.086	4.935	37.234
s_1_1_SMACv1.0_contig 1674	578	58	39	19	2	347	5	5	5	22	20	17	19	7.564	4.765	32.526
s_1_1_SMACv1.0_contig 1675	527	25	14	11	6	324.333	27.759	3	3	3	3	9	9	4.731	2.121	31.879
s_1_1_SMACv1.0_contig 1676	808	98	51	47	12	336.5	24.486	8	8	33	24	20	18	9.385	3.992	31.807
s_1_1_SMACv1.0_contig 1677	684	61	35	26	11	337.364	41.24	3	3	13	17	20	18	8.611	4.253	33.772
s_1_1_SMACv1.0_contig 1678	605	56	27	29	5	365.4	23.148	4	4	15	20	19	19	7.478	4.018	34.38
s_1_1_SMACv1.0_contig 1679	468	2	0	2	0			0	0	0	1	0	2	1.1	0.301	36.538
s_1_1_SMACv1.0_contig 1680	526	49	26	23	11	314.909	40.831	3	3	7	13	17	15	8.534	3.741	36.502
s_1_1_SMACv1.0_contig 1681	1327	182	74	108	31	340.548	27.254	21	21	40	34	54	26	11.963	6.39	42.276
s_1_1_SMACv1.0_contig 1682	1124	102	49	53	19	329.895	27.783	9	9	31	14	25	24	8.077	4.03	39.502
s_1_1_SMACv1.0_contig 1683	563	81	36	45	4	333.5	9.206	6	6	29	30	17	23	11.41	4.865	41.208
s_1_1_SMACv1.0_contig 1684	659	66	37	29	11	327.182	17.616	1	1	35	6	18	17	7.54	3.113	36.267
s_1_1_SMACv1.0_contig 1685	564	49	28	21	3	304	12.356	1	1	24	13	9	15	6.521	3.065	36.879
s_1_1_SMACv1.0_contig 1686	954	83	37	46	14	336.5	15.132	9	9	17	17	20	20	8.109	3.783	32.18
s_1_1_SMACv1.0_contig 1687	853	221	128	93	37	332.595	28.018	13	13	88	32	83	38	17.521	7.789	62.016
s_1_1_SMACv1.0_contig 1688	555	120	61	59	6	310.833	37.414	13	13	52	29	33	31	15.517	5.865	37.658
s_1_1_SMACv1.0_contig 1689	528	96	48	48	13	332.462	30.482	2	2	52	14	25	21	12.894	4.709	52.273
s_1_1_SMACv1.0_contig 1690	568	78	32	46	5	331.2	12.48	3	3	37	24	25	21	9.673	5.393	36.092
s_1_1_SMACv1.0_contig 1691	951	103	47	56	31	323.871	22.533	3	3	10	23	46	23	10.146	4.435	43.428
s_1_1_SMACv1.0_contig 1692	1306	138	63	75	35	335.114	23.757	10	10	30	16	54	21	8.965	4.435	39.969
s_1_1_SMACv1.0_contig 1693	803	90	42	48	16	331.312	22.315	9	9	29	9	26	27	9.909	5.695	32.628
s_1_1_SMACv1.0_contig 1694	487	94	39	55	9	324.778	19.007	12	12	18	32	30	27	16.168	7.11	40.862
s_1_1_SMACv1.0_contig 1695	1968	196	99	97	41	333.244	25.445	26	26	38	21	73	21	9.024	3.693	36.23
s_1_1_SMACv1.0_contig 1696	521	68	35	33	10	341.4	30.451	5	5	23	11	23	21	12.286	4.744	39.155
s_1_1_SMACv1.0_contig 1697	745	71	38	33	10	354.2	24.157	8	8	16	17	15	21	8.47	4.568	37.047
s_1_1_SMACv1.0_contig 1698	928	189	102	87	39	331.077	32.958	16	16	55	19	62	34	16.1	9.3	39.44
s_1_1_SMACv1.0_contig 1699	664	80	35	45	14	317.643	34.003	7	7	17	20	17	17	10.295	3.021	37.349
s_1_1_SMACv1.0_contig 1700	506	77	36	41	12	332.583	34.829	3	3	12	35	20	25	12.413	5.664	40.514
s_1_1_SMACv1.0_contig 1701	545	36	17	19	3	341.333	4.714	6	6	8	6	14	13	6.158	3.325	39.266
s_1_1_SMACv1.0_contig 1702	1694	203	116	87	42	330.333	21.762	16	16	44	33	73	21	11.727	4.684	41.736
s_1_1_SMACv1.0_contig 1703	579	60	23	37	6	334.333	20.637	6	6	18	18	10	14	7.706	3.167	30.052
s_1_1_SMACv1.0_contig 1704	602	80	34	46	17	339.882	22.255	5	5	22	14	23	23	10.834	5.507	37.209
s_1_1_SMACv1.0_contig 1705	561	56	28	28	9	328.444	25.029	5	5	5	23	14	16	8.212	3.225	34.225
s_1_1_SMACv1.0_contig 1706	549	89	39	50	9	340.778	26.972	8	8	22	32	28	28	13.091	6.042	36.612
s_1_1_SMACv1.0_contig 1707	679	41	24	17	9	353.444	33.781	1	1	8	12	18	10	5.807	2.551	32.99
s_1_1_SMACv1.0_contig 1708	523	41	20	21	4	321.25	12.173	5	5	8	15	8	14	6.581	2.725	38.432
s_1_1_SMACv1.0_contig 1709	1189	119	65	54	22	336.364	34.038	11	11	35	17	34	27	8.444	4.285	39.613
s_1_1_SMACv1.0_contig 1710	865	82	34	48	15	330.733	29.589	4	4	24	19	25	22	7.882	5.799	38.266
s_1_1_SMACv1.0_contig 1711	865	73	33	40	14	341.357	30.96	5	5	17	16	27	13	6.237	2.448	50.751
s_1_1_SMACv1.0_contig 1712	825	86	33	53	11	344.636	32.191	4	4	29	26	21	15	8.262	3.432	43.636
s_1_1_SMACv1.0_contig 1713	526	27	11	16	1	308	0	0	0	17	7	4	19	4.688	4.21	35.932
s_1_1_SMACv1.0_contig 1714	530	62	45	17	5	326.4	32.06	1	1	21	29	17	20	8.845	3.61	40.189
s_1_1_SMACv1.0_contig 1715	550	40	17	23	3	332.333	22.425	4	4	10	15	8	12	5.889	2.414	34.545
s_1_1_SMACv1.0_contig 1716	674	82	44	38	13	346.231	24.106	9	9	22	16	28	16	10.55	2.823	41.098
s_1_1_SMACv1.0_contig 1717	965	132	70	62	20	337.45	29.128	10	10	54	17	37	23	10.726	4.151	40.725
s_1_1_SMACv1.0_contig 1718	728	53	31	22	10	342.1	22.862	7	7	13	3	16	15	7.522	2.928	30.082
s_1_1_SMACv1.0_contig 1719	910	82	48	34	13	333	31.962	10	10	16	18	29	14	7.538	2.743	38.901
s_1_1_SMACv1.0_contig 1720	801	70	33	37	7	330.429	10.224	6	6	16	25	16	13	7.186	2.647	39.576
s_1_1_SMACv1.0_contig 1721	615	75	43	32	9	337.889	26.818	10	10	20	16	16	19	10.359	3.365	36.748
s_1_1_SMACv1.0_contig 1722	669	86	39	47	12	324.833	21.579	11	11	15	24	26	19	10.484	4.505	36.472
s_1_1_SMACv1.0_contig 1723	990	105	51	54	22	340.545	24.186	8	8	34	11	37	22	8.655	4.009	40.505
s_1_1_SMACv1.0_contig 1724	593	109	56	53	9	339.333	12.019	5	5	50	28	25	26	13.125	6.098	37.099
s_1_1_SMACv1.0_contig 1725	1270	138	71	67	19	330.947	35.273	11	11	43	31	42	18	9.237	3.478	32.992
s_1_1_SMACv1.0_contig 1726	517	63	29	34	7	341.571	16.369	5	5	22	14	20	20	10.383	4.228	36.557
s_1_1_SMACv1.0_contig 1727	528	47	21	26	2	361	35	9	9	16	9	8	15	7.008	2.984	37.689
s_1_1_SMACv1.0_contig 1728	514	66	32	34	7	324.857	44.293	7	7	21	17	18	19	10.014	4.083	42.023
s_1_1_SMACv1.0_contig 1729	803	75	36	39	11	329	27.769	8	8	21	14	20	14	7.563	3.498	38.356
s_1_1_SMACv1.0_contig 1730	538	60	28	32	5	341.4	15.041	5	5	21	19	12	13	8.173	2.222	38.29
s_1_1_SMACv1.0_contig 1731	553	40	17	23	4	348.25	20.067	2	2	15	13	8	10	5.436	1.886	34.72
s_1_1_SMACv1.0_contig 1732	553	88	45	43	6	342.5	28.488	4	4	54	12	23	21	11.052	4.902	47.74
s_1_1_SMACv1.0_contig 1733	689	104	48	56	14	332.714	36.636	10	10	22	32	31	27	11.746	5.524	39.187
s_1_1_SMACv1.0_contig 1734	817	50	25	25	9	339.556	27.937	4	4	12	10	17	12	5.597	2.405	38.556
s_1_1_SMACv1.0_contig 1735	600	45	18	27	7	339.286	23.279	3	3	15	8	14	15	6.752	3.271	38.333
s_1_1_SMACv1.0_contig 1736	815	95	56	39	14	329.357	37.452	5	5	32	24	26	16	8.805	3.409	39.387
s_1_1_SMACv1.0_contig 1737	718	122	58	64	22	320.5	24.652	7	7	44	18	40	30	12.944	6.308	42.201
s_1_1_SMACv1.0_contig 1738	592	45	27	18	8	338.375	27.097	3	3	15	8	10	14	6.387	3.197	38.176
s_1_1_SMACv1.0_contig 1739	560	52	21	31	7	320.286	39.434	2	2	18	16	10	14	6.671	2.764	38.214
s_1_1_SMACv1.0_contig 1740	642	195	61	134	27	328	22.111	6	6	81	44	55	42	21.313	10.835	56.075
s_1_1_SMACv1.0_contig 1741	667	66	31	35	10	332.6	21.772	9	9	14	13	23	18	8.198	4.141	36.582
s_1_1_SMACv1.0_contig 1742	596	61	24	37	11	328.455	19.095	6	6	14	13	17	18	8.633	4.72	37.584
s_1_1_SMACv1.0_contig 1743	799	56	27	29	5	346.8	30.076	9	9	9	14	13	15	7.066	2.994	36.921
s_1_1_SMACv1.0_contig 1744	598	64	29	35	15	335.133	34.907	5	5	16	8	21	17	9.135	3.081	40.97
s_1_1_SMACv1.0_contig 1745	666	91	42	49	14	330.786	26.23	5	5	18	28	32	24	12.619	5.492	40.09
s_1_1_SMACv1.0_contig 1746	588	126	74	52	16	329.812	26.733	17	17	40	16	42	34	18.757	7.858	38.605
s_1_1_SMACv1.0_contig 1747	707	37	18	19	7	320.714	23.255	3	3	3	13	12	11	5.13	2.706	35.078
s_1_1_SMACv1.0_contig 1748	551	61	26	35	9	317.778	37.909	5	5	21	12	18	17	8.443	3.308	35.027
s_1_1_SMACv1.0_contig 1749	612	54	29	25	9	311.778	37.505	5	5	2	23	15	15	7.887	3.084	35.131
s_1_1_SMACv1.0_contig 1750	608	62	37	25	0			2	2	33	22	21	19	6.521	5.097	71.217
s_1_1_SMACv1.0_contig 1751	801	75	40	35	14	332.857	33.224	9	9	16	8	25	21	9.07	4.511	30.337
s_1_1_SMACv1.0_contig 1752	1041	182	99	83	26	329.346	34.876	11	11	63	43	53	28	13.565	5.331	38.329
s_1_1_SMACv1.0_contig 1753	717	69	39	30	7	324.143	17.415	7	7	21	19	21	16	7.501	3.209	40.446
s_1_1_SMACv1.0_contig 1754	847	64	34	30	5	310.6	11.842	7	7	24	12	22	17	6.81	3.301	33.766
s_1_1_SMACv1.0_contig 1755	532	49	29	20	6	324.667	16.038	5	5	17	10	14	13	7.239	2.599	42.293
s_1_1_SMACv1.0_contig 1756	523	60	29	31	3	324.333	24.445	4	4	27	19	7	20	8.252	4.847	40.727
s_1_1_SMACv1.0_contig 1757	901	100	45	55	14	350.214	21.756	14	14	31	11	27	20	9.469	4.785	39.068
s_1_1_SMACv1.0_contig 1758	554	55	25	30	7	347.857	16.864	2	2	16	20	15	15	7.157	3.47	36.823
s_1_1_SMACv1.0_contig 1759	636	36	16	20	7	325.571	15.61	2	2	7	9	16	12	5.31	2.728	34.591
s_1_1_SMACv1.0_contig 1760	588	63	31	32	12	343.667	23.778	9	9	6	14	20	19	9.796	4.043	35.034
s_1_1_SMACv1.0_contig 1761	779	103	50	53	17	332.824	29.05	9	9	30	21	33	20	10.442	4.896	40.308
s_1_1_SMACv1.0_contig 1762	1373	206	109	97	34	327.294	27.837	21	21	63	30	68	23	12.298	4.649	38.82
s_1_1_SMACv1.0_contig 1763	1002	129	54	75	26	346.077	25.572	11	11	36	17	44	23	11.222	4.285	43.014
s_1_1_SMACv1.0_contig 1764	817	60	34	26	7	321.714	35.888	7	7	16	13	22	18	7.153	3.81	33.782
s_1_1_SMACv1.0_contig 1765	769	51	25	26	12	331.083	28.512	3	3	11	9	19	12	5.987	2.175	34.59
s_1_1_SMACv1.0_contig 1766	530	53	24	29	6	318.5	38.853	6	6	12	16	14	15	8.849	2.988	31.132
s_1_1_SMACv1.0_contig 1767	537	25	12	13	1	313	0	3	3	11	4	9	10	4.518	2.691	32.588
s_1_1_SMACv1.0_contig 1768	680	76	39	37	11	333.364	23.43	8	8	30	6	25	17	9.938	3.721	34.706
s_1_1_SMACv1.0_contig 1769	714	77	42	35	10	315.9	17.294	7	7	35	8	21	17	8.501	3.981	32.493
s_1_1_SMACv1.0_contig 1770	699	120	62	58	7	355.429	15.249	5	5	63	32	27	24	12.472	5.374	34.621
s_1_1_SMACv1.0_contig 1771	551	68	30	38	6	344.167	30.591	9	9	31	6	24	18	9.388	4.528	34.846
s_1_1_SMACv1.0_contig 1772	622	155	87	68	12	333	27.456	9	9	68	45	52	31	13.598	7.367	69.936
s_1_1_SMACv1.0_contig 1773	616	74	36	38	13	335.923	24.665	6	6	28	8	29	16	9.008	2.952	41.558
s_1_1_SMACv1.0_contig 1774	735	55	28	27	8	332.125	43.659	6	6	14	10	18	13	7.029	2.942	35.51
s_1_1_SMACv1.0_contig 1775	932	104	38	66	16	321.375	23.027	10	10	21	30	22	18	9	3.618	36.159
s_1_1_SMACv1.0_contig 1776	674	72	38	34	10	318.2	26.528	4	4	31	11	16	17	8.767	3.8	34.866
s_1_1_SMACv1.0_contig 1777	552	53	25	28	7	326.143	16.83	4	4	11	18	14	13	7.658	3.312	39.674
s_1_1_SMACv1.0_contig 1778	1770	235	113	122	50	337.18	29.319	16	16	51	42	84	24	12.186	5.227	35.819
s_1_1_SMACv1.0_contig 1779	516	36	17	19	5	323.4	7.283	3	3	13	7	12	9	5.372	2.095	32.171
s_1_1_SMACv1.0_contig 1780	713	116	65	51	24	337.708	27.035	10	10	18	30	44	23	12.686	5.118	61.431
s_1_1_SMACv1.0_contig 1781	507	69	49	20	6	326.333	23.942	3	3	10	40	21	16	8.686	2.761	33.333
s_1_1_SMACv1.0_contig 1782	697	138	71	67	16	339.625	21.951	15	15	30	44	36	35	15.864	6.461	36.155
s_1_1_SMACv1.0_contig 1783	667	102	45	57	14	334.071	34.269	13	13	30	17	31	22	12.111	4.237	38.681
s_1_1_SMACv1.0_contig 1784	903	83	34	49	10	327.7	37.478	9	9	24	20	32	14	7.703	3.715	34.109
s_1_1_SMACv1.0_contig 1785	706	74	28	46	11	337.364	34.631	4	4	18	24	19	14	8.084	2.57	40.51
s_1_1_SMACv1.0_contig 1786	1059	136	60	76	31	330.645	24.891	7	7	39	21	48	21	10.483	4.323	41.832
s_1_1_SMACv1.0_contig 1787	506	46	27	19	4	319.75	14.254	4	4	14	15	9	15	7.462	4.138	31.621
s_1_1_SMACv1.0_contig 1788	1055	166	87	79	24	326.875	31.239	14	14	57	29	49	24	12.789	4.572	35.924
s_1_1_SMACv1.0_contig 1789	685	50	28	22	7	329.857	23.148	7	7	15	6	16	12	6.877	2.836	33.139
s_1_1_SMACv1.0_contig 1790	997	101	48	53	13	327.538	31.98	16	16	14	27	29	19	8.502	4.377	35.607
s_1_1_SMACv1.0_contig 1791	662	62	31	31	7	318	42.007	7	7	23	9	16	14	8.116	3.385	27.341
s_1_1_SMACv1.0_contig 1792	786	115	64	51	13	337.308	21.334	10	10	34	33	33	26	12.009	5.352	35.242
s_1_1_SMACv1.0_contig 1793	529	62	33	29	7	323.429	19.588	6	6	15	19	17	19	10.089	4.1	49.527
s_1_1_SMACv1.0_contig 1794	624	81	37	44	11	301.182	38.675	3	3	32	19	30	20	10.391	3.978	34.135
s_1_1_SMACv1.0_contig 1795	674	70	37	33	15	334.667	32.541	2	2	30	4	21	24	9.724	5.436	36.944
s_1_1_SMACv1.0_contig 1796	551	84	37	47	10	327.2	22.706	8	8	31	15	21	25	12.448	4.985	34.483
s_1_1_SMACv1.0_contig 1797	645	67	40	27	17	329.824	25.744	5	5	14	8	31	18	9.287	3.912	34.574
s_1_1_SMACv1.0_contig 1798	536	88	58	30	7	329.286	26.44	4	4	42	24	24	20	11.31	4.729	40.112
s_1_1_SMACv1.0_contig 1799	630	57	28	29	12	337.417	30.95	4	4	10	14	19	14	7.73	3.712	45.079
s_1_1_SMACv1.0_contig 1800	575	68	38	30	10	339.8	34.196	8	8	17	15	20	22	9.449	4.646	31.826
s_1_1_SMACv1.0_contig 1801	1109	177	92	85	22	339.136	20.859	18	18	53	42	45	27	12.506	5.06	38.052
s_1_1_SMACv1.0_contig 1802	1385	113	62	51	23	334.391	27.492	14	14	12	23	37	17	7.391	3.49	35.668
s_1_1_SMACv1.0_contig 1803	518	74	43	31	7	311.286	25.516	4	4	25	26	19	25	10.861	5.022	34.363
s_1_1_SMACv1.0_contig 1804	567	46	18	28	9	343.889	30.267	2	2	20	4	13	13	7.131	3.036	35.626
s_1_1_SMACv1.0_contig 1805	497	27	13	14	9	322	22.886	0	0	2	7	11	13	5.457	2.791	43.461
s_1_1_SMACv1.0_contig 1806	594	58	32	26	11	345.545	34.992	5	5	15	8	16	15	8.943	3.564	35.017
s_1_1_SMACv1.0_contig 1807	629	89	46	43	10	326.6	34.074	13	13	29	13	31	19	10.967	4.054	36.248
s_1_1_SMACv1.0_contig 1808	637	45	24	21	9	333.889	28.676	2	2	6	15	22	14	6.94	3.103	40.659
s_1_1_SMACv1.0_contig 1809	630	80	49	31	8	347.875	17.596	11	11	14	28	14	19	8.392	3.491	39.365
s_1_1_SMACv1.0_contig 1810	637	68	32	36	11	319.182	24.15	5	5	21	12	23	16	8.592	3.698	39.246
s_1_1_SMACv1.0_contig 1811	720	103	53	50	7	339.143	26.978	10	10	29	37	22	17	10.36	3.522	30.972
s_1_1_SMACv1.0_contig 1812	991	106	60	46	14	325.643	28.238	12	12	34	18	25	16	8.89	2.999	37.134
s_1_1_SMACv1.0_contig 1813	816	87	40	47	14	342.357	35.107	7	7	29	16	20	14	8.458	2.833	38.603
s_1_1_SMACv1.0_contig 1814	583	58	22	36	9	340.556	38.321	3	3	12	22	15	14	7.835	2.987	38.937
s_1_1_SMACv1.0_contig 1815	705	72	37	35	12	336.333	20.946	3	3	23	19	17	18	7.631	3.685	36.454
s_1_1_SMACv1.0_contig 1816	590	65	30	35	9	338.667	22.872	7	7	23	10	17	17	8.358	4.073	38.814
s_1_1_SMACv1.0_contig 1817	1007	139	68	71	29	343.621	29.31	14	14	29	23	44	24	11.765	4.735	35.353
s_1_1_SMACv1.0_contig 1818	1453	153	79	74	21	335.429	24.387	8	8	56	35	39	15	8.294	2.714	38.747
s_1_1_SMACv1.0_contig 1819	841	84	44	40	11	333.909	31.99	7	7	36	10	24	18	8.473	4.419	34.958
s_1_1_SMACv1.0_contig 1820	657	106	41	65	18	331.722	26.212	6	6	38	18	36	21	11.362	5.203	63.927
s_1_1_SMACv1.0_contig 1821	1072	121	69	52	23	336.826	24.88	8	8	29	29	31	22	9.145	4.655	38.06
s_1_1_SMACv1.0_contig 1822	822	85	43	42	21	339.524	22.023	3	3	14	21	30	17	8.636	3.328	40.024
s_1_1_SMACv1.0_contig 1823	1470	264	146	118	54	335.37	32.207	26	26	62	38	81	28	15.669	5.816	37.211
s_1_1_SMACv1.0_contig 1824	719	97	54	43	16	336.75	18.71	7	7	31	18	37	24	11.758	4.945	35.466
s_1_1_SMACv1.0_contig 1825	626	60	26	34	5	323.8	19.539	9	9	19	12	12	16	8.324	2.829	31.949
s_1_1_SMACv1.0_contig 1826	821	132	71	61	8	331.375	22.693	10	10	68	27	32	23	10.991	4.601	37.759
s_1_1_SMACv1.0_contig 1827	557	49	26	23	2	313.5	61.5	7	7	17	13	10	15	7.129	3.409	34.65
s_1_1_SMACv1.0_contig 1828	574	40	18	22	4	368.5	10.874	5	5	16	4	13	12	5.936	3.472	30.139
s_1_1_SMACv1.0_contig 1829	864	92	43	49	10	326.1	25.634	6	6	35	23	19	16	7.782	3.067	40.972
s_1_1_SMACv1.0_contig 1830	641	67	39	28	7	328.714	20.225	6	6	25	13	21	15	8.089	3.35	31.201
s_1_1_SMACv1.0_contig 1831	804	71	35	36	10	342.4	36.266	7	7	21	15	17	16	7.299	3.257	35.697
s_1_1_SMACv1.0_contig 1832	592	75	37	38	4	352.5	21.558	8	8	39	12	19	22	10.274	5.721	34.291
s_1_1_SMACv1.0_contig 1833	1064	158	63	95	27	332.074	32.686	3	3	43	52	38	29	11.28	4.763	43.139
s_1_1_SMACv1.0_contig 1834	735	86	51	35	7	325	22.097	7	7	33	19	35	23	9.664	5.153	30.204
s_1_1_SMACv1.0_contig 1835	891	96	43	53	27	334.889	20.333	4	4	25	8	38	22	9.227	5.899	37.149
s_1_1_SMACv1.0_contig 1836	1093	109	51	58	17	336.706	37.214	9	9	26	26	33	15	9.36	2.928	36.688
s_1_1_SMACv1.0_contig 1837	561	59	26	33	6	321.833	23.119	3	3	23	18	16	14	8.706	3.127	31.551
s_1_1_SMACv1.0_contig 1838	513	100	61	39	14	337.429	24.512	7	7	29	27	42	22	11.93	4.744	68.226
s_1_1_SMACv1.0_contig 1839	581	57	26	31	1	339	0	2	2	22	27	14	17	7.219	4.295	27.883
s_1_1_SMACv1.0_contig 1840	699	61	26	35	8	336.25	22.415	5	5	18	15	19	16	7.469	4.024	36.052
s_1_1_SMACv1.0_contig 1841	394	18	5	13	1	307	0	1	1	8	5	6	9	4.231	2.203	23.35
s_1_1_SMACv1.0_contig 1842	1144	113	62	51	25	333.08	30.79	10	10	28	13	42	19	8.78	4.129	43.531
s_1_1_SMACv1.0_contig 1843	635	92	49	43	13	339.846	24.831	8	8	27	17	26	22	12.78	4.557	34.173
s_1_1_SMACv1.0_contig 1844	719	56	28	28	9	330.111	29.358	5	5	8	17	20	14	7.373	2.618	37.552
s_1_1_SMACv1.0_contig 1845	1382	194	84	110	36	331.917	34.497	17	17	59	22	59	26	12.5	4.932	36.469
s_1_1_SMACv1.0_contig 1846	535	47	26	21	4	323.75	21.626	11	11	13	4	14	15	7.456	3.398	34.019
s_1_1_SMACv1.0_contig 1847	554	44	20	24	5	348.8	30.76	7	7	14	6	13	13	6.542	2.443	35.199
s_1_1_SMACv1.0_contig 1848	631	42	20	22	3	326.667	25.038	7	7	10	11	6	11	5.943	2.028	41.046
s_1_1_SMACv1.0_contig 1849	680	60	37	23	12	333.083	34.43	5	5	14	12	20	15	7.078	3.494	40.588
s_1_1_SMACv1.0_contig 1850	494	31	13	18	3	334.667	6.549	3	3	9	8	8	11	5.98	2.777	32.794
s_1_1_SMACv1.0_contig 1851	789	52	25	27	15	334.4	25.757	2	2	6	11	17	11	6.256	2.696	32.319
s_1_1_SMACv1.0_contig 1852	676	51	28	23	5	335	26.586	6	6	7	20	15	12	6.376	2.481	41.568
s_1_1_SMACv1.0_contig 1853	822	120	79	41	12	336.5	27.008	13	13	45	25	30	21	10.388	3.803	40.876
s_1_1_SMACv1.0_contig 1854	1141	112	69	43	20	328.35	30.722	7	7	32	22	37	19	8.251	3.257	40.491
s_1_1_SMACv1.0_contig 1855	801	87	40	47	19	326.579	24.558	6	6	24	12	29	17	9.433	3.654	38.951
s_1_1_SMACv1.0_contig 1856	902	94	47	47	19	336.211	33.822	13	13	10	20	27	24	9.344	4.725	37.251
s_1_1_SMACv1.0_contig 1857	762	129	57	72	22	325.864	26.667	14	14	31	23	45	30	14.133	7.105	41.339
s_1_1_SMACv1.0_contig 1858	1049	134	65	69	18	327.833	30.124	13	13	56	15	40	20	9.62	3.06	40.229
s_1_1_SMACv1.0_contig 1859	1095	140	72	68	17	334	27.362	8	8	58	27	41	24	10.757	5.32	33.607
s_1_1_SMACv1.0_contig 1860	512	70	33	37	10	319.5	32.085	8	8	16	18	22	21	11.525	4.112	35.938
s_1_1_SMACv1.0_contig 1861	746	58	35	23	9	337.111	28.696	5	5	23	7	20	14	6.196	2.962	36.863
s_1_1_SMACv1.0_contig 1862	746	60	25	35	15	328.067	23.428	6	6	12	6	25	13	7.445	2.909	40.08
s_1_1_SMACv1.0_contig 1863	826	93	52	41	18	330.222	23.425	7	7	35	7	22	18	9.636	3.752	33.656
s_1_1_SMACv1.0_contig 1864	551	62	32	30	8	327.875	24.436	4	4	18	15	27	16	9.387	2.985	34.664
s_1_1_SMACv1.0_contig 1865	1001	127	65	62	19	340.632	18.354	7	7	31	42	36	17	10.101	3.432	38.362
s_1_1_SMACv1.0_contig 1866	832	123	57	66	17	330.118	31.887	13	13	42	21	33	23	11.565	4.766	35.938
s_1_1_SMACv1.0_contig 1867	791	59	28	31	9	324.444	38.396	9	9	10	9	26	13	7.088	3.124	34.893
s_1_1_SMACv1.0_contig 1868	711	69	38	31	9	332.111	19.445	9	9	14	18	20	22	7.975	4.237	32.208
s_1_1_SMACv1.0_contig 1869	680	68	39	29	9	340.222	35.605	7	7	27	7	20	16	8.051	2.878	30.588
s_1_1_SMACv1.0_contig 1870	569	117	57	60	20	334.9	27.282	6	6	50	14	33	29	14.838	6.786	44.991
s_1_1_SMACv1.0_contig 1871	526	99	49	50	17	341.647	28.036	6	6	29	23	42	29	14.823	6.507	36.882
s_1_1_SMACv1.0_contig 1872	677	65	29	36	6	331.167	24.245	4	4	21	22	10	14	7.127	3.147	35.451
s_1_1_SMACv1.0_contig 1873	629	87	39	48	8	310.125	41.739	8	8	29	25	25	21	10.903	4.255	36.884
s_1_1_SMACv1.0_contig 1874	1019	94	56	38	14	330.214	27.224	8	8	40	9	27	19	7.943	5.895	36.997
s_1_1_SMACv1.0_contig 1875	510	88	38	50	6	332	33.131	8	8	38	21	16	23	11.629	5.623	51.961
s_1_1_SMACv1.0_contig 1876	477	16	8	8	2	317	0	0	0	7	4	4	12	3.474	3.147	28.092
s_1_1_SMACv1.0_contig 1877	754	64	36	28	11	323.364	14.742	6	6	9	20	19	15	7.74	3.48	35.809
s_1_1_SMACv1.0_contig 1878	520	47	24	23	5	344	23.639	8	8	9	12	13	13	7.9	3.189	32.115
s_1_1_SMACv1.0_contig 1879	600	47	34	13	7	319.714	14.743	3	3	15	12	13	15	6.227	3.975	28.833
s_1_1_SMACv1.0_contig 1880	722	55	32	23	10	332.7	21.854	7	7	13	8	20	21	6.58	4.537	33.241
s_1_1_SMACv1.0_contig 1881	635	69	30	39	14	330.929	29.509	4	4	11	20	19	24	9.737	4.832	31.496
s_1_1_SMACv1.0_contig 1882	821	70	37	33	18	339.389	25.007	4	4	16	7	30	17	8.855	3.536	36.419
s_1_1_SMACv1.0_contig 1883	686	64	26	38	9	326.111	32.76	5	5	24	12	16	14	7.445	3.408	40.379
s_1_1_SMACv1.0_contig 1884	577	49	27	22	3	308.333	8.731	5	5	17	16	15	12	5.707	2.854	35.009
s_1_1_SMACv1.0_contig 1885	806	112	53	59	20	329	27.37	6	6	47	12	31	23	11.844	4.34	32.01
s_1_1_SMACv1.0_contig 1886	500	66	33	33	4	336.75	14.307	5	5	16	32	16	24	9.362	5.069	41
s_1_1_SMACv1.0_contig 1887	534	53	31	22	9	327.667	22.296	3	3	18	11	25	21	8.163	3.954	35.019
s_1_1_SMACv1.0_contig 1888	758	75	44	31	8	315	38.151	10	10	18	18	15	20	9.414	4.215	35.092
s_1_1_SMACv1.0_contig 1889	551	55	35	20	6	336.5	32.796	3	3	28	9	14	15	7.432	3.222	39.02
s_1_1_SMACv1.0_contig 1890	527	51	20	31	6	325.5	30.842	8	8	10	13	14	14	7.027	2.979	38.52
s_1_1_SMACv1.0_contig 1891	537	46	20	26	10	317.2	38.35	1	1	12	11	13	12	6.996	2.309	37.43
s_1_1_SMACv1.0_contig 1892	740	88	49	39	20	345.15	28.892	8	8	21	10	26	18	10.597	4.175	36.081
s_1_1_SMACv1.0_contig 1893	699	84	30	54	11	330.364	33.521	4	4	31	22	30	18	8.856	3.887	35.908
s_1_1_SMACv1.0_contig 1894	919	108	53	55	16	331.125	35.105	11	11	39	10	32	23	10.295	3.797	39.173
s_1_1_SMACv1.0_contig 1895	900	79	41	38	14	323.286	33.612	11	11	8	18	25	15	8.648	3.839	35.667
s_1_1_SMACv1.0_contig 1896	731	100	42	58	16	328.125	32.056	6	6	34	20	27	20	10.546	4.621	52.941
s_1_1_SMACv1.0_contig 1897	631	55	26	29	10	324.2	22.635	5	5	11	11	17	16	7.74	3.138	41.204
s_1_1_SMACv1.0_contig 1898	582	57	24	33	6	329.167	14.508	4	4	23	10	15	17	8.672	3.859	39.863
s_1_1_SMACv1.0_contig 1899	798	83	54	29	13	340.077	26.782	4	4	32	17	24	18	8.208	3.705	33.584
s_1_1_SMACv1.0_contig 1900	826	107	45	62	11	325.182	25.877	7	7	44	21	31	21	10.711	3.51	34.383
s_1_1_SMACv1.0_contig 1901	584	34	18	16	5	331.4	35.875	3	3	12	5	13	13	5.604	2.582	38.527
s_1_1_SMACv1.0_contig 1902	672	52	29	23	13	342.077	29.617	5	5	5	10	21	14	7.61	3.014	31.845
s_1_1_SMACv1.0_contig 1903	1026	244	121	123	35	324.457	28.303	21	21	86	41	64	36	19.672	6.024	39.474
s_1_1_SMACv1.0_contig 1904	867	118	51	67	24	331.417	26.38	8	8	33	21	37	27	11.03	5.927	36.678
s_1_1_SMACv1.0_contig 1905	604	56	25	31	4	317.5	25.976	5	5	15	21	14	15	7.775	3.192	35.596
s_1_1_SMACv1.0_contig 1906	549	47	24	23	4	317.5	29.304	4	4	11	18	11	15	6.29	3.648	36.612
s_1_1_SMACv1.0_contig 1907	1033	217	116	101	44	325.75	28.012	11	11	55	49	78	27	15.654	5.312	55.663
s_1_1_SMACv1.0_contig 1908	671	34	17	17	9	325.556	33.708	3	3	0	8	11	13	5.523	2.975	33.83
s_1_1_SMACv1.0_contig 1909	623	69	42	27	9	329	21.129	8	8	21	13	27	16	9.34	3.837	36.116
s_1_1_SMACv1.0_contig 1910	562	85	49	36	13	320.231	30.39	7	7	20	25	21	29	11.484	7.078	54.626
s_1_1_SMACv1.0_contig 1911	522	48	24	24	12	337.5	19.56	5	5	12	2	16	15	7.985	3.442	34.483
s_1_1_SMACv1.0_contig 1912	513	35	17	18	0			3	3	15	13	9	10	5.347	2.078	32.554
s_1_1_SMACv1.0_contig 1913	586	56	27	29	7	332.429	15.945	6	6	18	12	10	14	7.633	3.142	30.375
s_1_1_SMACv1.0_contig 1914	722	66	32	34	5	318.8	32.75	6	6	32	10	19	15	7.46	3.29	36.011
s_1_1_SMACv1.0_contig 1915	648	38	22	16	4	333	11.292	4	4	5	15	14	10	5.87	1.858	32.716
s_1_1_SMACv1.0_contig 1916	1136	145	78	67	25	331.28	34.756	15	15	27	36	45	24	10.245	4.316	41.197
s_1_1_SMACv1.0_contig 1917	962	111	59	52	15	344.733	32.409	12	12	30	24	28	18	10.125	3.45	35.239
s_1_1_SMACv1.0_contig 1918	779	89	49	40	18	320.944	28.551	5	5	28	12	34	19	9.994	4.521	38.896
s_1_1_SMACv1.0_contig 1919	545	64	37	27	3	327	4.967	3	3	31	19	12	15	8.811	2.841	41.468
s_1_1_SMACv1.0_contig 1920	701	111	54	57	11	337.545	14.241	8	8	42	30	29	24	12.361	4.537	36.377
s_1_1_SMACv1.0_contig 1921	522	24	10	14	2	339.5	2.5	1	1	11	5	9	14	4.088	3.344	31.992
s_1_1_SMACv1.0_contig 1922	1214	122	73	49	19	338.684	31.285	14	14	31	23	36	19	8.556	3.258	37.644
s_1_1_SMACv1.0_contig 1923	648	54	23	31	11	334.273	15.557	5	5	10	11	21	14	7.455	2.939	35.648
s_1_1_SMACv1.0_contig 1924	723	64	36	28	8	339	20.094	6	6	15	14	13	18	8.555	3.834	39.972
s_1_1_SMACv1.0_contig 1925	633	73	24	49	9	346.333	24.522	5	5	16	28	28	15	8.455	3.418	30.332
s_1_1_SMACv1.0_contig 1926	922	85	41	44	20	335.6	29.782	8	8	15	13	38	21	8.129	4.63	37.527
s_1_1_SMACv1.0_contig 1927	534	52	23	29	2	279	3	12	12	17	7	9	18	7.959	3.259	37.079
s_1_1_SMACv1.0_contig 1928	551	52	31	21	8	337.875	21.228	4	4	16	11	13	16	7.838	3.732	36.298
s_1_1_SMACv1.0_contig 1929	1052	128	63	65	29	336.241	23.484	9	9	42	8	46	30	10.82	6.226	33.27
s_1_1_SMACv1.0_contig 1930	575	43	26	17	3	317.333	11.813	5	5	22	3	9	14	6.383	3.08	29.217
s_1_1_SMACv1.0_contig 1931	807	69	34	35	15	325.667	20.122	7	7	5	20	26	19	7.357	3.818	37.67
s_1_1_SMACv1.0_contig 1932	686	60	34	26	8	321.125	37.767	7	7	16	14	15	16	6.778	3.522	37.755
s_1_1_SMACv1.0_contig 1933	569	66	43	23	8	324.375	28.284	6	6	25	11	21	20	8.436	4.737	35.677
s_1_1_SMACv1.0_contig 1934	789	108	60	48	13	332.231	43.398	10	10	27	34	26	21	10.721	4.731	35.361
s_1_1_SMACv1.0_contig 1935	734	118	61	57	19	338.263	23.682	14	14	29	21	35	22	13.413	4.485	48.501
s_1_1_SMACv1.0_contig 1936	803	132	57	75	23	331.087	39.201	12	12	40	21	42	24	12.999	3.95	38.107
s_1_1_SMACv1.0_contig 1937	566	57	33	24	7	307.429	30.77	5	5	27	4	19	23	8.772	5.036	32.509
s_1_1_SMACv1.0_contig 1938	731	147	79	68	17	329.118	33.017	15	15	54	24	42	29	16.828	6.162	43.092
s_1_1_SMACv1.0_contig 1939	690	66	37	29	15	341.267	34.233	2	2	16	13	25	18	9.351	4.151	35.072
s_1_1_SMACv1.0_contig 1940	659	41	19	22	7	343.429	16.5	3	3	9	12	13	11	5.569	2.465	37.178
s_1_1_SMACv1.0_contig 1941	540	90	54	36	9	337.333	33.062	4	4	24	40	19	24	11.67	5.788	45.37
s_1_1_SMACv1.0_contig 1942	549	42	24	18	8	345	28.827	2	2	8	14	18	15	6.056	2.985	35.155
s_1_1_SMACv1.0_contig 1943	886	58	26	32	11	327.364	28.519	6	6	12	10	23	15	6.623	2.938	31.716
s_1_1_SMACv1.0_contig 1944	1387	169	91	78	22	334.864	23.396	23	23	37	37	49	21	10.133	4.059	32.733
s_1_1_SMACv1.0_contig 1945	522	16	8	8	3	307	33.437	1	1	5	2	6	7	3.052	1.646	37.739
s_1_1_SMACv1.0_contig 1946	562	101	50	51	5	322.4	37.463	10	10	32	37	16	32	14.53	7.323	36.299
s_1_1_SMACv1.0_contig 1947	584	149	67	82	16	320.438	28.946	5	5	61	44	47	35	16.757	7.157	56.678
s_1_1_SMACv1.0_contig 1948	785	71	24	47	9	335.667	18.251	6	6	26	14	19	16	6.799	3.109	46.752
s_1_1_SMACv1.0_contig 1949	519	56	20	36	2	307	41	1	1	26	22	8	17	8.164	2.545	38.921
s_1_1_SMACv1.0_contig 1950	679	50	21	29	4	348	31.016	4	4	10	21	20	14	7.04	2.747	37.261
s_1_1_SMACv1.0_contig 1951	1077	83	41	42	13	332.308	21.496	9	9	20	15	29	14	7.381	3.185	37.976
s_1_1_SMACv1.0_contig 1952	534	73	44	29	4	316.5	32.237	6	6	32	19	20	22	11.5	5.158	46.629
s_1_1_SMACv1.0_contig 1953	747	71	36	35	13	329.923	33.07	5	5	14	20	24	14	8.091	2.929	36.814
s_1_1_SMACv1.0_contig 1954	630	41	20	21	1	340	0	4	4	23	5	13	13	5.93	2.826	33.016
s_1_1_SMACv1.0_contig 1955	980	200	101	99	36	335.472	28.815	16	16	59	33	53	38	16.633	7.298	38.163
s_1_1_SMACv1.0_contig 1956	980	66	29	37	11	335.364	21.508	7	7	13	15	14	17	5.962	2.914	35.612
s_1_1_SMACv1.0_contig 1957	505	72	43	29	11	338.545	16.935	3	3	32	11	23	18	9.594	4.185	66.139
s_1_1_SMACv1.0_contig 1958	527	38	20	18	3	321.333	45.763	4	4	18	6	9	10	5.292	2.263	34.725
s_1_1_SMACv1.0_contig 1959	520	49	30	19	5	332	39.003	2	2	24	10	11	17	8.123	4.35	31.923
s_1_1_SMACv1.0_contig 1960	695	83	40	43	11	340.091	26.861	9	9	25	18	23	19	9.729	4.407	34.388
s_1_1_SMACv1.0_contig 1961	758	55	30	25	10	318.3	37.154	4	4	11	15	16	12	6.228	2.77	38.391
s_1_1_SMACv1.0_contig 1962	609	48	27	21	7	331.143	36.949	9	9	9	5	19	13	8.204	2.552	37.11
s_1_1_SMACv1.0_contig 1963	647	94	42	52	11	342.636	35.589	5	5	38	22	22	21	10.487	5.459	36.94
s_1_1_SMACv1.0_contig 1964	721	46	19	27	6	332.5	20.106	3	3	8	17	16	13	6.412	2.294	35.645
s_1_1_SMACv1.0_contig 1965	556	52	28	24	6	334.5	35.781	3	3	15	17	10	19	7.838	4.23	32.914
s_1_1_SMACv1.0_contig 1966	529	54	28	26	3	323.333	34.422	5	5	14	24	10	18	7.535	3.788	30.435
s_1_1_SMACv1.0_contig 1967	880	130	52	78	17	340.706	30.544	11	11	46	24	33	21	11.922	4.635	36.023
s_1_1_SMACv1.0_contig 1968	599	52	22	30	3	334.333	7.587	7	7	19	11	16	15	7.898	3.476	30.551
s_1_1_SMACv1.0_contig 1969	772	76	40	36	13	341.769	20.207	6	6	26	9	28	14	8.948	3.209	39.249
s_1_1_SMACv1.0_contig 1970	576	68	35	33	10	334	29.526	7	7	22	12	18	15	9.198	3.292	30.556
s_1_1_SMACv1.0_contig 1971	500	67	41	26	10	317	26.773	7	7	26	6	16	24	11.166	5.612	35
s_1_1_SMACv1.0_contig 1972	630	66	33	33	8	330.25	28.791	5	5	26	14	17	14	7.665	2.777	43.81
s_1_1_SMACv1.0_contig 1973	829	102	48	54	13	339.538	39.179	14	14	19	29	31	17	10.434	4.003	33.052
s_1_1_SMACv1.0_contig 1974	605	38	16	22	7	344.857	30.432	2	2	11	8	14	9	5.529	1.969	33.884
s_1_1_SMACv1.0_contig 1975	724	107	55	52	12	322.833	21.232	11	11	29	31	51	19	10.465	4.423	59.807
s_1_1_SMACv1.0_contig 1976	802	104	54	50	16	334.188	26.106	10	10	35	15	26	18	10.363	3.324	43.516
s_1_1_SMACv1.0_contig 1977	505	80	38	42	7	333.143	17.299	10	10	35	11	19	26	12.719	5.914	38.812
s_1_1_SMACv1.0_contig 1978	605	79	51	28	7	331.429	28.339	5	5	19	36	19	21	10.58	4.737	35.207
s_1_1_SMACv1.0_contig 1979	650	90	50	40	15	327.867	31.782	8	8	33	10	34	22	10.798	5.127	37.385
s_1_1_SMACv1.0_contig 1980	1044	104	50	54	14	330	32.892	12	12	24	24	33	17	9.23	3.125	37.452
s_1_1_SMACv1.0_contig 1981	514	24	11	13	1	268	0	2	2	5	10	4	10	4.562	1.934	35.992
s_1_1_SMACv1.0_contig 1982	651	73	38	35	11	330.636	26.248	8	8	20	15	19	19	9.201	4.483	34.562
s_1_1_SMACv1.0_contig 1983	996	70	26	44	13	331.769	27.064	6	6	16	12	27	14	6.519	2.79	33.534
s_1_1_SMACv1.0_contig 1984	872	69	32	37	13	324.692	24.027	6	6	23	6	25	14	7.083	2.661	33.601
s_1_1_SMACv1.0_contig 1985	551	55	28	27	3	291	26.319	7	7	7	27	11	14	7.788	2.744	36.116
s_1_1_SMACv1.0_contig 1986	673	73	43	30	12	336.083	22.692	11	11	11	14	20	18	10.135	3.988	31.947
s_1_1_SMACv1.0_contig 1987	556	58	31	27	8	327.875	35.632	5	5	22	7	16	15	9.25	3.591	40.108
s_1_1_SMACv1.0_contig 1988	689	44	23	21	7	322.286	35.564	6	6	5	13	9	12	5.797	2.696	33.527
s_1_1_SMACv1.0_contig 1989	565	54	26	28	4	354.75	20.945	6	6	18	16	12	17	7.768	3.858	38.23
s_1_1_SMACv1.0_contig 1990	641	74	34	40	3	329.667	19.939	9	9	36	13	27	17	8.718	2.941	31.981
s_1_1_SMACv1.0_contig 1991	1043	107	56	51	19	346.211	28.276	9	9	30	20	40	20	8.035	3.886	38.351
s_1_1_SMACv1.0_contig 1992	1121	99	63	36	16	332.188	31.812	8	8	21	27	27	14	7.487	2.368	34.88
s_1_1_SMACv1.0_contig 1993	620	96	48	48	9	318.778	41.166	10	10	34	23	22	21	12.471	4.007	31.935
s_1_1_SMACv1.0_contig 1994	512	44	24	20	3	300.333	25.773	6	6	17	7	9	13	7.75	3.142	28.516
s_1_1_SMACv1.0_contig 1995	1040	114	61	53	21	330.762	33.221	4	4	48	15	35	16	8.552	3.178	40.769
s_1_1_SMACv1.0_contig 1996	942	117	73	44	17	335.176	30.409	12	12	31	27	40	21	10.406	4.259	35.987
s_1_1_SMACv1.0_contig 1997	723	104	51	53	11	348.273	21.642	8	8	23	42	25	27	10.307	5.166	46.611
s_1_1_SMACv1.0_contig 1998	574	62	32	30	8	330.5	29.542	8	8	12	16	19	15	9.686	3.418	36.585
s_1_1_SMACv1.0_contig 1999	968	117	56	61	26	334.538	29.959	4	4	28	27	41	18	9.417	3.091	36.983
[truncated: 280,984+ more rows]

## Sheet: Summary
SMACv1.0	Simple	de novo	Contig	Stats
Contig Set	Contig Count	Min Contig Length (bp)	Max Contig Length (bp)	Mean Contig Length (bp)	Total Contig Length (bp)
N25	14677	11785	87225	17,645.91	258989092
N50	45209	6366	87225	11,457.19	517968143
N75	102708	3181	87225	7,564.66	776951205
All contigs	282983	65	87225	3,660.77	1035934476
Long contigs (> 10Kb)	20658	10000	87225	15,670.17	323714458
Short contigs (< 200bp)*	36	65	199	157.61	5674
*Note, the mapping back process causes some contigs to be shorter than the specified minimum distance provided at the onset of assembly.
*These contigs are obviously not well supported and were also eliminated by NCBI.
