# Supplementary material for: A Multi-Platform Draft de novo Genome Assembly and Comparative Analysis for the Scarlet Macaw (Ara macao)
Source: PLoS One. 2013 May 8;8(5):e62415. doi: 10.1371/journal.pone.0062415 (PMC3648530; doi:10.1371/journal.pone.0062415)
Supplement: Table S2 — Scarlet macaw scaffolded de novo assembly statistics. (XLSX) [file pone.0062415.s003.xlsx]

## Sheet: SMACv1.1ScaffoldedAssStats
Contig	Reference length	Mapped reads	Forward reads	Reversed reads	Reads in aligned pairs	Reads in broken pairs: wrong distance or mate inverted	Reads in broken pairs: mate on other contig	Reads in broken pairs: mate not mapped	Mean distance-all libraries	Standard deviation	Non-perfect matches	Maximum coverage	Average coverage	Standard deviation	% GC
s_1_1_NewScaffoldedContig_1	14554	2987	1458	1529	1622	416	253	656	1105.4	1492.69	650	71	16.626	11.062	32.754
s_1_1_NewScaffoldedContig_2	54711	10508	5277	5231	5848	1838	624	2001	1394.01	1718.82	1665	79	15.924	9.27	35.7
s_1_1_NewScaffoldedContig_3	12526	2200	1085	1115	1156	390	171	432	1101.71	1569.44	550	42	15.127	7.064	37.881
s_1_1_NewScaffoldedContig_4	6964	2634	1333	1301	1248	306	391	641	1088.02	1467.44	666	81	29.092	10.022	47.904
s_1_1_NewScaffoldedContig_5	52120	16995	8489	8506	10724	2196	516	3287	1468.8	1712.28	3691	117	25.81	10.374	44.87
s_1_1_NewScaffoldedContig_6	51703	17834	8967	8867	11426	2482	410	3252	1522.03	1744.3	3319	67	27.34	9.325	45.03
s_1_1_NewScaffoldedContig_7	19008	5426	2781	2645	3070	776	381	1106	1350.43	1661.15	854	55	23.037	9.593	41.446
s_1_1_NewScaffoldedContig_8	41698	12441	6156	6285	7610	1868	368	2390	1429.64	1686.75	2312	63	24.034	9.916	42.738
s_1_1_NewScaffoldedContig_9	8397	1574	787	787	852	294	144	260	895.08	1301.12	264	49	16.197	6.884	36.584
s_1_1_NewScaffoldedContig_10	12022	3222	1658	1564	1582	428	440	724	982.382	1380.12	886	135	21.446	14.773	36.583
s_1_1_NewScaffoldedContig_11	5532	88211	46842	41369	3528	4116	24340	55615	331.304	31.391	52909	15916	1045.25	2361.84	18.854
s_1_1_NewScaffoldedContig_12	51730	15613	7827	7786	9426	2096	401	3469	1502.06	1745.56	3102	73	23.435	11.497	41.852
s_1_1_NewScaffoldedContig_13	3790	860	436	424	372	118	160	188	463.419	467.793	188	40	18.803	7.883	39.657
s_1_1_NewScaffoldedContig_14	24687	4190	2117	2073	2176	758	284	885	1141.78	1556.22	793	45	14.336	9.84	31.907
s_1_1_NewScaffoldedContig_15	6673	695	423	272	52	42	253	344	413.269	364.926	309	226	7.009	20.211	15.69
s_1_1_NewScaffoldedContig_16	13328	2773	1377	1396	1448	454	282	546	991.396	1391.9	614	60	17.271	8.928	37.447
s_1_1_NewScaffoldedContig_17	3755	970	438	532	444	164	159	181	513.059	538.727	260	39	21.92	7.015	43.782
s_1_1_NewScaffoldedContig_18	2313	824	419	405	264	94	128	321	357.356	184.846	201	51	24.641	11.996	54.042
s_1_1_NewScaffoldedContig_19	17457	2750	1363	1387	1422	542	173	555	1065.49	1460.72	461	40	13.476	7.625	33.82
s_1_1_NewScaffoldedContig_20	6220	24804	11920	12884	646	992	6426	16445	449.923	450.196	20079	5498	213.885	603.805	23.103
s_1_1_NewScaffoldedContig_21	4232	1428	735	693	594	180	302	336	595.771	633.823	396	51	26.523	11.097	44.802
s_1_1_NewScaffoldedContig_22	697	245	116	129	62	30	69	83	336.613	24.611	53	49	26.261	10.901	43.759
s_1_1_NewScaffoldedContig_23	10342	3016	1568	1448	1816	354	278	527	1322.81	1600.49	640	51	23.008	10.137	44.518
s_1_1_NewScaffoldedContig_24	32489	5976	2980	2996	3454	1094	285	1023	1226.05	1628.36	1359	46	15.744	8.798	35.892
s_1_1_NewScaffoldedContig_25	11253	2483	1193	1290	1198	382	327	549	1006.35	1403.34	438	51	17.698	8.952	39.074
s_1_1_NewScaffoldedContig_26	5707	1195	604	591	596	164	169	248	665.856	953.604	216	55	17.421	12.987	33.398
s_1_1_NewScaffoldedContig_27	42541	11677	5733	5944	7020	1692	565	2250	1460.35	1737.69	2417	82	21.745	10.369	41.555
s_1_1_NewScaffoldedContig_28	37019	5593	2776	2817	2966	1032	168	1300	1204.48	1598.36	933	41	12.804	8.403	34.69
s_1_1_NewScaffoldedContig_29	16547	4033	2035	1998	2196	532	413	799	1169.18	1526.6	1110	227	20.78	15.126	39.506
s_1_1_NewScaffoldedContig_30	7872	1735	863	872	904	302	184	299	808.434	1228.74	498	42	19.557	7.973	40.117
s_1_1_NewScaffoldedContig_31	60044	13064	6509	6555	7554	2028	678	2580	1262.19	1634.08	2695	71	17.998	11.241	36.054
s_1_1_NewScaffoldedContig_32	56496	20324	10216	10108	13194	2656	427	3773	1460.59	1700.91	2901	63	28.33	9.277	46.258
s_1_1_NewScaffoldedContig_33	5785	1241	612	629	622	186	188	222	749.273	1091.04	272	38	17.962	5.701	38.583
s_1_1_NewScaffoldedContig_34	1809	8667	4363	4304	1602	308	3380	3288	341.717	117.823	3002	1261	300.712	231.498	56.219
s_1_1_NewScaffoldedContig_35	2822	18451	9301	9150	5316	1296	5180	6456	359.224	183.859	6052	1262	456.153	327.628	50.921
s_1_1_NewScaffoldedContig_36	71229	27914	14035	13879	17802	3304	942	5555	1533.57	1715.05	5995	68	29.446	11.641	47.302
s_1_1_NewScaffoldedContig_37	1546	553	273	280	174	50	161	162	337.046	28.02	166	59	26.197	12.224	47.607
s_1_1_NewScaffoldedContig_38	2745	1016	503	513	390	106	224	280	484.846	457.12	254	52	29.497	9.993	47.942
s_1_1_NewScaffoldedContig_39	1291	731	402	329	62	42	376	246	336.774	22.533	530	453	47.477	93.718	37.8
s_1_1_NewScaffoldedContig_40	36881	6879	3409	3470	3976	980	407	1396	1278.57	1627.63	1161	47	15.385	10.632	32.597
s_1_1_NewScaffoldedContig_41	51372	7973	4058	3915	4642	1484	251	1426	1359.93	1731	1253	45	13.443	7.519	33.832
s_1_1_NewScaffoldedContig_42	30702	7709	3801	3908	4648	1230	384	1328	1430.79	1730.88	1337	54	20.424	8.938	40.861
s_1_1_NewScaffoldedContig_43	1720	341	168	173	164	50	58	65	331.171	33.689	58	32	17.845	6.403	38.837
s_1_1_NewScaffoldedContig_44	2264	360	202	158	162	18	84	90	469.605	436.782	64	32	12.568	5.72	52.341
s_1_1_NewScaffoldedContig_45	15026	1777	889	888	932	270	142	387	1050.58	1567.42	330	43	10.346	7.95	27.912
s_1_1_NewScaffoldedContig_46	13690	4307	2159	2148	2560	532	291	860	1180.58	1529.32	970	51	25.42	9.443	45.376
s_1_1_NewScaffoldedContig_47	81306	14375	7092	7283	7368	2110	1179	3485	1444.98	1747.29	2947	462	14.171	17.668	31.508
s_1_1_NewScaffoldedContig_48	11679	3569	1806	1763	854	304	1232	1126	794.141	1124.7	2069	1303	26.421	111.523	29.771
s_1_1_NewScaffoldedContig_49	18111	1933	962	971	774	406	229	460	898.455	1318.28	390	45	9.384	8.226	25.487
s_1_1_NewScaffoldedContig_50	5744	332	180	152	60	56	97	115	1076.03	1667.5	150	56	4.748	9.019	14.659
s_1_1_NewScaffoldedContig_51	44304	5273	2689	2584	2468	864	562	1266	1049.73	1508.6	1052	141	10.042	9.516	27.345
s_1_1_NewScaffoldedContig_52	5644	1185	585	600	556	184	220	203	452.759	443.523	215	38	17.619	7.455	40.84
s_1_1_NewScaffoldedContig_53	8550	1523	763	760	696	288	215	293	894.836	1290.79	305	38	15.141	7.431	35.602
s_1_1_NewScaffoldedContig_54	5128	991	512	479	484	176	152	162	541.657	673.126	227	43	16.54	9.088	37.715
s_1_1_NewScaffoldedContig_55	49608	18241	9150	9091	11614	1958	576	3861	1582.49	1751.92	3722	87	27.723	13.521	45.646
s_1_1_NewScaffoldedContig_56	28422	11244	5723	5521	6406	1324	667	2682	1447.77	1641.96	2430	162	28.769	12.703	49.458
s_1_1_NewScaffoldedContig_57	27246	4117	2037	2080	1992	666	334	1058	990.308	1371.17	941	45	12.591	9.19	30.548
s_1_1_NewScaffoldedContig_58	2870	925	439	486	394	90	195	242	514.949	531.516	175	47	24.616	8.565	44.878
s_1_1_NewScaffoldedContig_59	37613	7241	3694	3547	3854	1156	586	1511	1416.57	1773.75	1111	53	15.76	10.973	33.039
s_1_1_NewScaffoldedContig_60	35964	4485	2254	2231	1740	844	699	1112	968.538	1432.83	1108	446	10.296	18.485	27.305
s_1_1_NewScaffoldedContig_61	2601	1974	1027	947	100	42	1068	745	332.04	29.614	1808	628	64.667	117.754	23.837
s_1_1_NewScaffoldedContig_62	565	348	204	144	14	4	181	143	342.857	25.323	245	213	40.158	52.466	50.973
s_1_1_NewScaffoldedContig_63	1282	535	259	276	138	44	101	248	345.493	116.087	174	47	25.751	9.032	67.083
s_1_1_NewScaffoldedContig_64	593	145	63	82	10	4	30	98	322.6	19.043	23	29	12.609	6.069	55.143
s_1_1_NewScaffoldedContig_65	14523	2143	1066	1077	884	318	208	701	1184.33	1568.61	468	68	11.97	9.679	30.648
s_1_1_NewScaffoldedContig_66	25504	3748	1869	1879	1988	652	283	750	1187.63	1598.88	764	45	12.548	8.215	30.501
s_1_1_NewScaffoldedContig_67	29477	5932	2985	2947	3262	956	431	1172	1248.39	1621.27	1346	70	16.768	10.6	34.831
s_1_1_NewScaffoldedContig_68	40257	5790	2950	2840	3088	1002	438	1148	1295.08	1653.14	847	52	12.082	8.809	30.673
s_1_1_NewScaffoldedContig_69	21586	4448	2291	2157	2146	640	499	1097	1327.79	1693.93	1139	393	16.571	20.971	34.87
s_1_1_NewScaffoldedContig_70	10394	770	388	382	270	100	158	230	989.022	1336.58	272	132	5.961	10.801	25.957
s_1_1_NewScaffoldedContig_71	4146	1273	606	667	446	106	400	301	601.327	623.856	397	84	23.56	13.143	44.863
s_1_1_NewScaffoldedContig_72	32657	5677	2791	2886	3084	952	447	1093	1154.17	1566.72	828	52	14.627	9.288	34.127
s_1_1_NewScaffoldedContig_73	8920	2952	1474	1478	1612	330	355	612	1108.42	1452.87	438	54	25.593	11.681	42.993
s_1_1_NewScaffoldedContig_74	5159	1597	805	792	726	182	232	430	578.066	733.405	296	57	24.833	8.805	44.97
s_1_1_NewScaffoldedContig_75	58924	11950	6029	5921	7194	2084	374	2058	1335.82	1692.64	2647	51	17.232	8.55	37.764
s_1_1_NewScaffoldedContig_76	10281	3294	1573	1721	1370	406	618	842	736.362	1076.42	883	143	25.272	12.115	44.033
s_1_1_NewScaffoldedContig_77	20677	3663	1819	1844	2100	620	231	641	1322.66	1672.66	688	50	14.959	8.317	36.383
s_1_1_NewScaffoldedContig_78	37420	7692	3841	3851	4646	1180	406	1343	1328.37	1658.98	1510	86	16.969	10.431	34.428
s_1_1_NewScaffoldedContig_79	51897	14510	7213	7297	9218	2024	503	2532	1492.66	1747.55	2287	65	22.353	9.214	44.195
s_1_1_NewScaffoldedContig_80	29608	5709	2864	2845	3070	784	504	1246	1114.46	1543.29	1100	203	15.955	13.431	31.448
s_1_1_NewScaffoldedContig_81	5655	1312	658	654	638	230	204	218	682.201	914.654	232	44	19.063	10.347	37.896
s_1_1_NewScaffoldedContig_82	12812	4191	2129	2062	2064	590	382	1089	1257.71	1622.61	883	79	25.344	12.543	39.845
s_1_1_NewScaffoldedContig_83	26436	6363	3159	3204	3804	968	322	1164	1233.8	1575.13	1291	55	20.062	8.495	42.022
s_1_1_NewScaffoldedContig_84	8827	2701	1401	1300	1358	322	341	649	1304.21	1553.25	541	64	22.68	14.242	42.427
s_1_1_NewScaffoldedContig_85	19219	3872	1941	1931	2208	666	193	737	1223.6	1564.72	756	48	16.93	8.125	38.457
s_1_1_NewScaffoldedContig_86	12850	2296	1133	1163	966	412	257	635	1160.61	1586.27	393	50	14.488	10.663	31.113
s_1_1_NewScaffoldedContig_87	34722	8783	4371	4412	5396	1362	349	1540	1385.87	1715.02	1300	51	20.77	8.887	40.081
s_1_1_NewScaffoldedContig_88	18409	4748	2373	2375	2662	638	366	1000	1275.25	1646.01	957	58	20.857	10.613	38.383
s_1_1_NewScaffoldedContig_89	7888	47306	24048	23258	3710	7528	18221	17445	375.293	489.86	23060	4473	409.836	933.819	11.79
s_1_1_NewScaffoldedContig_90	77287	17869	8921	8948	10946	2834	399	3386	1389.76	1721.95	3600	53	19.227	8.476	39.739
s_1_1_NewScaffoldedContig_91	1140	167	90	77	64	12	46	41	331.406	28.493	38	22	11.683	4.249	52.632
s_1_1_NewScaffoldedContig_92	12803	5489	2712	2777	3228	570	516	1109	1396.34	1643.19	1296	67	31.927	10.258	49.629
s_1_1_NewScaffoldedContig_93	21214	3247	1669	1578	1372	460	428	938	1072.97	1493.84	1042	445	11.89	20.882	25.686
s_1_1_NewScaffoldedContig_94	13126	1944	1001	943	984	324	186	408	1007.07	1416.66	326	67	12.434	11.859	26.276
s_1_1_NewScaffoldedContig_95	28688	9033	4526	4507	5054	1322	497	2039	1232.07	1557.19	1941	69	24.5	12.379	43.133
s_1_1_NewScaffoldedContig_96	26166	4230	2132	2098	2186	668	399	899	1108.1	1543.41	859	44	13.487	10.075	28.931
s_1_1_NewScaffoldedContig_97	27956	9295	4695	4600	5630	1120	547	1865	1380.8	1654.74	1967	67	26.047	10.314	46.341
s_1_1_NewScaffoldedContig_98	22095	4659	2336	2323	2788	716	198	871	1208.59	1593.06	816	49	17.814	8.106	40.774
s_1_1_NewScaffoldedContig_99	2640	559	305	254	206	142	91	110	335.913	25.616	103	39	18.145	7.519	43.788
s_1_1_NewScaffoldedContig_100	5581	1012	528	484	446	190	146	207	658.691	828.708	171	30	15.353	4.987	38.291
s_1_1_NewScaffoldedContig_101	43910	7925	3929	3996	4532	1236	418	1593	1166.61	1545.16	1556	60	15.094	10.344	34.004
s_1_1_NewScaffoldedContig_102	23101	9084	4706	4378	5198	1102	648	2017	1450.09	1670.79	1907	69	29.423	14.302	44.215
s_1_1_NewScaffoldedContig_103	1280	222	104	118	40	28	77	71	343.65	24.928	36	29	12.866	5.396	35.078
s_1_1_NewScaffoldedContig_104	15689	3161	1605	1556	1798	506	176	622	1227.9	1619.53	684	44	17.009	8.193	37.243
s_1_1_NewScaffoldedContig_105	40304	19929	9849	10080	11922	2002	640	5160	1652.72	1756.09	4447	82	35.321	13.161	50.434
s_1_1_NewScaffoldedContig_106	27109	4179	2090	2089	2430	774	222	669	1137.52	1563.11	600	42	13.476	8.488	31.794
s_1_1_NewScaffoldedContig_107	3636	817	407	410	366	148	182	110	454.432	445.824	160	47	19.426	6.105	40.127
s_1_1_NewScaffoldedContig_108	56663	20029	10131	9898	11810	2320	1039	4608	1535.7	1712.1	4084	218	25.904	14.737	47.49
s_1_1_NewScaffoldedContig_109	2892	668	337	331	296	100	115	145	383.655	261.454	157	39	19.963	6.346	41.874
s_1_1_NewScaffoldedContig_110	22278	7182	3489	3693	2944	770	1368	1998	1209.73	1578.28	2430	1635	23.815	69.929	36.781
s_1_1_NewScaffoldedContig_111	21831	2465	1250	1215	1126	454	281	560	971.973	1408.6	490	46	9.514	9.249	23.338
s_1_1_NewScaffoldedContig_112	610	135	66	69	28	6	78	22	331.5	45.638	12	33	15.636	8.607	40.328
s_1_1_NewScaffoldedContig_113	4799	1552	813	739	744	238	282	261	472.371	546.2	278	59	27.07	9.329	43.301
s_1_1_NewScaffoldedContig_114	3916	32808	15947	16861	8006	4764	7553	12147	379.475	263.017	11243	2045	562.14	312.625	57.278
s_1_1_NewScaffoldedContig_115	61650	16057	8015	8042	9466	2418	600	3315	1412.64	1699.72	2990	64	21.03	10.06	40.412
s_1_1_NewScaffoldedContig_116	7323	2824	1414	1410	1522	294	306	678	1030.14	1322.48	639	56	28.943	9.415	50.225
s_1_1_NewScaffoldedContig_117	99929	24286	12233	12053	14754	3452	844	4815	1423.44	1726.08	4369	71	19.752	10.242	39.234
s_1_1_NewScaffoldedContig_118	19661	3081	1526	1555	1698	540	196	586	1189.21	1576.61	504	46	13.254	7.82	34.917
s_1_1_NewScaffoldedContig_119	583	2025	1103	922	28	36	1021	926	331.786	28.046	1471	1320	237.501	319.627	44.425
s_1_1_NewScaffoldedContig_120	40775	5903	2987	2916	3162	1210	297	1109	1073.97	1490.51	1302	47	12.773	7.893	31.931
s_1_1_NewScaffoldedContig_121	5702	238	130	108	84	28	49	74	802.5	1209.63	50	23	3.33	5.157	14.679
s_1_1_NewScaffoldedContig_122	860	220	91	129	30	20	56	113	346.267	25.392	35	40	17.665	9.377	41.628
s_1_1_NewScaffoldedContig_123	10558	1490	725	765	648	198	227	390	906.198	1271.75	307	41	11.342	9.279	27.95
s_1_1_NewScaffoldedContig_124	42327	10939	5579	5360	5674	1480	1254	2358	1276.38	1612.49	2651	1492	20.526	50.499	37.758
s_1_1_NewScaffoldedContig_125	25554	10165	5149	5016	6062	1190	421	2377	1578.81	1731.22	1988	76	29.48	11.914	49.147
s_1_1_NewScaffoldedContig_126	824	427	209	218	102	28	121	174	336	24.329	100	69	33.583	18.292	56.796
s_1_1_NewScaffoldedContig_127	28451	4071	2031	2040	2034	718	291	949	1250.93	1647.59	753	106	11.967	8.56	31.538
s_1_1_NewScaffoldedContig_128	6463	2459	1200	1259	1022	282	487	631	903.26	1248.88	603	82	28.504	10.237	48.631
s_1_1_NewScaffoldedContig_129	55432	21242	10765	10477	12826	2464	985	4737	1439.26	1648.25	4303	70	28.251	14.753	44.624
s_1_1_NewScaffoldedContig_130	912	16529	8939	7590	4470	1504	4762	5602	331.996	28.093	8064	2184	1396.17	500.126	46.162
s_1_1_NewScaffoldedContig_131	1047	31349	15013	16336	6602	1852	8789	13882	329.38	27.087	14644	2930	2053.08	783.532	51.194
s_1_1_NewScaffoldedContig_132	21549	8940	4542	4398	5534	1116	402	1783	1415.25	1614.28	1746	72	31.356	10.113	48.448
s_1_1_NewScaffoldedContig_133	31407	7803	3830	3973	4662	1180	391	1429	1415.38	1719.17	1495	58	20.53	9.67	38.708
s_1_1_NewScaffoldedContig_134	4519	357	155	202	186	40	64	60	488.892	520.947	62	17	7.299	3.16	38.615
s_1_1_NewScaffoldedContig_135	33434	6784	3357	3427	4140	1018	184	1306	1281.95	1655.1	1120	57	17.102	8.797	38.957
s_1_1_NewScaffoldedContig_136	2408	400	183	217	198	66	68	63	381.556	238.021	79	38	14.438	7.083	36.088
s_1_1_NewScaffoldedContig_137	34527	5825	2887	2938	3336	896	274	1223	1260.9	1641.48	926	50	14.063	11.002	30.544
s_1_1_NewScaffoldedContig_138	18319	6032	3055	2977	3552	750	317	1317	1386.41	1643.03	952	67	25.507	9.803	46.209
s_1_1_NewScaffoldedContig_139	1528	382	215	167	48	30	95	206	348.25	31.362	74	46	17.022	13.59	37.893
s_1_1_NewScaffoldedContig_140	108885	40313	19815	20498	16956	4020	8671	10156	1466.62	1727.21	17608	5574	30.99	198.534	39.888
s_1_1_NewScaffoldedContig_141	12163	3595	1755	1840	1856	488	327	874	1011.47	1322.18	742	60	23.337	12.239	42.514
s_1_1_NewScaffoldedContig_142	6852	3707	1870	1837	1832	350	429	1060	1084.99	1266.02	897	78	36.482	11.01	59.048
s_1_1_NewScaffoldedContig_143	13771	4200	2146	2054	2450	586	302	796	1407.34	1674.68	673	63	24.054	10.078	44.419
s_1_1_NewScaffoldedContig_144	16628	5704	2711	2993	2254	716	1020	1643	1024.59	1392.43	1928	651	25.738	43.825	39.006
s_1_1_NewScaffoldedContig_145	12119	732	368	364	268	126	96	223	855.433	1211.01	109	24	5.142	5.148	23.847
s_1_1_NewScaffoldedContig_146	1693	5972	2668	3304	1870	480	1761	1785	332.567	58.78	1850	493	244.54	80.227	58.063
s_1_1_NewScaffoldedContig_147	29694	4198	2082	2116	2150	772	296	883	1236.83	1657.61	693	57	11.992	9.411	29.531
s_1_1_NewScaffoldedContig_148	7079	1042	510	532	330	44	78	574	1076.46	1601.19	256	57	8.961	14.788	23.195
s_1_1_NewScaffoldedContig_149	26674	10131	5000	5131	5084	1220	1015	2674	1355.78	1620.89	2713	996	27.596	41.774	42.198
s_1_1_NewScaffoldedContig_150	35842	9231	4244	4987	2934	1018	2501	2652	1070.36	1493.54	4241	3061	21.578	133.243	30.612
s_1_1_NewScaffoldedContig_151	49005	8062	4039	4023	4794	1524	265	1281	1197.79	1584.18	1237	48	14.424	8.837	33.162
s_1_1_NewScaffoldedContig_152	19461	2950	1477	1473	1422	550	289	610	1022.1	1437.4	595	46	13.3	8.35	30.517
s_1_1_NewScaffoldedContig_153	2054	167	82	85	96	20	13	31	336.229	32.274	30	18	7.857	3.494	42.6
s_1_1_NewScaffoldedContig_154	33793	8005	3969	4036	4764	1244	325	1528	1269.04	1604.32	1327	58	19.479	9.9	41.225
s_1_1_NewScaffoldedContig_155	26471	7198	3587	3611	4418	828	303	1562	1618.79	1706.68	1022	44	19.38	6.644	53.323
s_1_1_NewScaffoldedContig_156	15012	1884	937	947	888	362	209	387	1261.63	1662.81	268	33	10.666	6.903	29.903
s_1_1_NewScaffoldedContig_157	2744	375	186	189	122	86	67	90	377.754	286.879	61	29	11.257	5.797	33.783
s_1_1_NewScaffoldedContig_158	936	106	48	58	34	20	27	24	329.471	28.122	11	23	9.016	4.333	32.158
s_1_1_NewScaffoldedContig_159	699	74	35	39	18	18	24	11	322.556	24.914	8	24	9.599	4.211	33.906
s_1_1_NewScaffoldedContig_160	17015	3127	1572	1555	1636	580	274	562	984.747	1418.79	427	53	15.865	7.702	37.161
s_1_1_NewScaffoldedContig_161	40109	10956	5408	5548	6646	1378	397	2380	1531.1	1741.41	2000	125	21.135	12.474	40.181
s_1_1_NewScaffoldedContig_162	44102	12400	6245	6155	7746	1708	424	2297	1366.45	1653.48	2274	54	22.75	9.43	42.524
s_1_1_NewScaffoldedContig_163	3539	578	268	310	294	54	101	119	538.83	572.89	90	28	13.78	5.61	44.109
s_1_1_NewScaffoldedContig_164	4928	1616	807	809	604	158	301	532	741.079	872.429	392	59	24.954	11.481	41.579
s_1_1_NewScaffoldedContig_165	22730	4473	2287	2186	2390	664	271	1064	1297.33	1675.25	882	57	16.115	11.749	33.234
s_1_1_NewScaffoldedContig_166	14731	2887	1409	1478	1512	468	267	596	1024.08	1410.47	577	47	16.07	10.806	33.664
s_1_1_NewScaffoldedContig_167	14783	119064	54146	64918	16070	10134	34038	57563	336.365	57.766	48515	6955	537.705	1334.21	10.485
s_1_1_NewScaffoldedContig_168	17750	6597	3321	3276	3850	714	313	1632	1390.78	1617.11	1564	67	27.971	10.84	47.865
s_1_1_NewScaffoldedContig_169	1961	1517	734	783	506	114	471	408	400.032	305.613	304	81	52.011	11.444	60.989
s_1_1_NewScaffoldedContig_170	2710	632	311	321	246	76	157	141	375.041	227.368	166	39	19.068	9.598	38.893
s_1_1_NewScaffoldedContig_171	18594	4448	2239	2209	2252	616	405	1090	1106.43	1484.61	1079	74	19.748	11.9	35.463
s_1_1_NewScaffoldedContig_172	26771	8734	4444	4290	5326	1132	416	1732	1471.88	1657.22	1701	71	25.059	11.202	45.411
s_1_1_NewScaffoldedContig_173	4712	1474	738	736	680	198	210	368	627.397	777.22	276	53	24.603	8.194	45.267
s_1_1_NewScaffoldedContig_174	2521	1142	600	542	446	136	275	274	444.628	378.107	251	59	32.898	10.308	54.463
s_1_1_NewScaffoldedContig_175	11082	5204	2684	2520	918	336	2165	1721	1021.08	1412.97	3505	2522	40.491	209.755	31.89
s_1_1_NewScaffoldedContig_176	25103	3864	1963	1901	1724	534	505	1027	1193.96	1578.4	1086	374	12.371	18.169	28.734
s_1_1_NewScaffoldedContig_177	21043	3578	1822	1756	1882	536	323	762	1250.87	1646.45	643	49	14.213	10.252	30.685
s_1_1_NewScaffoldedContig_178	6923	1791	892	899	326	136	704	591	978.675	1474.99	962	689	19.778	63.726	25.321
s_1_1_NewScaffoldedContig_179	19745	4829	2481	2348	2096	542	782	1357	817.059	1146	1128	59	18.306	15.629	31.699
s_1_1_NewScaffoldedContig_180	1875	78	42	36	0	8	34	35			7	29	3.023	5.57	11.733
s_1_1_NewScaffoldedContig_181	37381	9300	4660	4640	5552	1378	313	1867	1380.91	1646.32	1799	70	19.921	9.795	41.577
s_1_1_NewScaffoldedContig_182	621	176	73	103	10	4	60	102	374.2	26.233	37	40	17.449	13.832	42.19
s_1_1_NewScaffoldedContig_183	21632	8979	4477	4502	5228	956	760	1944	1434.48	1620.84	2054	65	30.426	12.807	48.59
s_1_1_NewScaffoldedContig_184	3887	1248	611	637	342	98	349	446	495.813	467.024	439	184	22.936	19.946	40.777
s_1_1_NewScaffoldedContig_185	50592	10889	5350	5539	6158	1642	470	2460	1289.86	1619.54	1719	54	17.569	9.401	37.966
s_1_1_NewScaffoldedContig_186	15807	3689	1835	1854	2138	566	106	817	1123.22	1506.71	689	52	19.574	9.407	39.938
s_1_1_NewScaffoldedContig_187	16517	2355	1160	1195	1192	386	172	549	1004.03	1481.88	384	54	12.061	10.908	27.457
s_1_1_NewScaffoldedContig_188	36255	4828	2500	2328	2532	800	371	1020	1275.56	1673.43	826	43	11.181	8.777	27.993
s_1_1_NewScaffoldedContig_189	22803	7327	3648	3679	4154	926	545	1603	1401.69	1637.63	1404	63	24.549	11.21	46.06
s_1_1_NewScaffoldedContig_190	10972	5544	2811	2733	2726	520	518	1720	1377.46	1559.36	1223	106	34.261	16.907	53.09
s_1_1_NewScaffoldedContig_191	40296	8872	4439	4433	4680	1332	718	2000	1146.64	1529.36	2007	65	17.962	9.831	37.622
s_1_1_NewScaffoldedContig_192	4803	555	278	277	168	70	138	171	513.119	507.533	137	40	9.099	10.691	20.092
s_1_1_NewScaffoldedContig_193	23784	4681	2403	2278	2704	702	250	963	1080.08	1496.86	952	55	16.514	10.758	34.128
s_1_1_NewScaffoldedContig_194	6122	54476	28618	25858	1260	2460	19885	30490	319.951	35.264	43200	14888	579.908	1805.52	19.226
s_1_1_NewScaffoldedContig_195	4905	1042	592	450	34	98	272	633	320.824	45.785	574	294	12.993	40.92	11.58
s_1_1_NewScaffoldedContig_196	6760	2643	1295	1348	1176	244	331	866	1098.2	1308.44	473	63	27.797	15.078	47.204
s_1_1_NewScaffoldedContig_197	3011	833	389	444	328	120	200	172	400.457	327.568	237	43	23.456	7.253	44.802
s_1_1_NewScaffoldedContig_198	10916	3836	1921	1915	2052	472	280	979	1213.61	1529.68	749	61	27.089	12.583	44.907
s_1_1_NewScaffoldedContig_199	3042	726	379	347	290	70	155	195	463.076	469.119	148	47	19.57	8.871	43.458
s_1_1_NewScaffoldedContig_200	15760	3536	1790	1746	1686	672	352	769	1120.49	1527.07	788	95	18.076	10.464	38.871
s_1_1_NewScaffoldedContig_201	11247	5739	2834	2905	2516	490	1065	1612	1222.39	1504.26	2273	1069	38.492	75.167	48.262
s_1_1_NewScaffoldedContig_202	35471	1910	959	951	972	360	123	410	1074.5	1487.97	317	26	4.647	4.965	22.198
s_1_1_NewScaffoldedContig_203	25506	3836	1887	1949	1966	690	349	748	1066.21	1545.25	668	41	12.991	9.461	29.726
s_1_1_NewScaffoldedContig_204	1039	326	160	166	96	54	100	72	324.708	32.442	91	38	23.337	5.883	51.011
s_1_1_NewScaffoldedContig_205	543	229	123	106	24	12	55	137	329.5	32.105	49	40	22.825	8.81	56.538
s_1_1_NewScaffoldedContig_206	3594	1836	894	942	696	136	526	466	600.937	604.212	364	64	35.528	11.125	55.426
s_1_1_NewScaffoldedContig_207	3959	354	170	184	176	38	62	69	563.023	565.61	46	20	7.923	4.278	38.848
s_1_1_NewScaffoldedContig_208	44535	8864	4387	4477	5308	1390	500	1498	1264.44	1596.26	1650	61	16.649	9.212	37.49
s_1_1_NewScaffoldedContig_209	15808	7723	3818	3905	4514	780	467	1873	1434.83	1653.58	1505	77	36.055	10.681	50.683
s_1_1_NewScaffoldedContig_210	2829	1050	522	528	320	104	227	389	538.919	529.68	286	59	25.456	13.775	50.407
s_1_1_NewScaffoldedContig_211	46416	13585	6930	6655	8030	1798	866	2689	1276.51	1611.01	2617	59	23.455	10.083	41.94
s_1_1_NewScaffoldedContig_212	78673	21104	10523	10581	13154	2854	862	3913	1377.37	1656.03	3956	143	21.616	11.076	40.046
s_1_1_NewScaffoldedContig_213	1620	276	144	132	122	46	45	57	340.803	23.088	55	28	14.81	6.518	38.519
s_1_1_NewScaffoldedContig_214	1735	1061	496	565	88	66	542	352	331.318	29.826	793	683	52.183	138.369	38.905
s_1_1_NewScaffoldedContig_215	11817	3550	1812	1738	1954	504	246	789	1064.99	1423.84	799	55	24.558	9.404	42.532
s_1_1_NewScaffoldedContig_216	1564	766	387	379	200	68	227	265	328.82	28.092	164	65	33.854	11.164	51.279
s_1_1_NewScaffoldedContig_217	15639	4734	2328	2406	2752	650	399	874	1293.64	1654.57	850	70	24.18	11.322	40.879
s_1_1_NewScaffoldedContig_218	89249	17413	8724	8689	9864	2944	997	3290	1286.59	1655.4	2885	283	16.297	10.465	35.93
s_1_1_NewScaffoldedContig_219	51398	9031	4493	4538	4550	1280	900	2140	1385.79	1705.52	2016	242	13.979	12.434	31.643
s_1_1_NewScaffoldedContig_220	23484	4597	2244	2353	2478	756	363	921	1055.17	1481.97	787	51	16.435	10.344	33.444
s_1_1_NewScaffoldedContig_221	40841	9744	4860	4884	6048	1404	307	1814	1440.42	1719.93	1628	50	19.573	8.563	42.051
s_1_1_NewScaffoldedContig_222	6227	1373	697	676	716	206	190	240	755.76	1065.85	253	40	18.391	6.779	39.907
s_1_1_NewScaffoldedContig_223	43330	8246	4140	4106	4132	1280	826	1866	1111.43	1491.42	1924	127	15.448	11.993	31.262
s_1_1_NewScaffoldedContig_224	41385	6852	3392	3460	3848	1138	413	1288	1319.21	1671.48	1202	47	14.057	8.573	34.184
s_1_1_NewScaffoldedContig_225	31949	4830	2372	2458	2626	890	278	932	1224.33	1643.67	766	48	12.744	8.959	31.942
s_1_1_NewScaffoldedContig_226	37804	6733	3277	3456	3904	1184	271	1247	1282.89	1655.9	1081	47	15.109	9.355	34.565
s_1_1_NewScaffoldedContig_227	2688	5172	2602	2570	1928	828	997	1374	506.147	501.12	1496	218	138.49	30.239	50.67
s_1_1_NewScaffoldedContig_228	2489	1372	681	691	482	126	242	506	433.527	387.92	293	75	39.971	10.969	51.868
s_1_1_NewScaffoldedContig_229	11238	2653	1299	1354	1374	402	250	573	1193.25	1518.43	539	43	18.956	8.341	43.931
s_1_1_NewScaffoldedContig_230	4690	1511	815	696	506	124	221	641	727.925	831.628	327	68	21.816	18.789	35.458
s_1_1_NewScaffoldedContig_231	2045	544	288	256	220	70	151	87	334.936	29.331	145	56	22.725	12.816	39.413
s_1_1_NewScaffoldedContig_232	14752	2278	1129	1149	1246	420	148	421	1012.44	1421.37	417	37	13.322	6.189	35.67
s_1_1_NewScaffoldedContig_233	740	167	83	84	30	24	47	63	327.333	24.055	68	36	17.378	6.958	40
s_1_1_NewScaffoldedContig_234	2932	363	203	160	184	14	72	88	483.207	454.677	69	24	10.044	3.53	45.532
s_1_1_NewScaffoldedContig_235	7279	1403	698	705	684	254	142	297	1062.09	1439.41	380	47	16.273	7.677	38.11
s_1_1_NewScaffoldedContig_236	1511	1038	484	554	232	64	320	416	331.129	26.857	212	92	43.745	19.661	61.747
s_1_1_NewScaffoldedContig_237	1311	28880	14525	14355	8900	9050	888	9465	335.906	39.875	18029	2828	1920.89	747.978	37.757
s_1_1_NewScaffoldedContig_238	16071	6477	3284	3193	3472	612	847	1467	1351.24	1633.96	1617	542	31.032	34.765	45.598
s_1_1_NewScaffoldedContig_239	569	76	34	42	16	16	29	15	335.875	28.729	6	18	10.902	4.008	38.313
s_1_1_NewScaffoldedContig_240	19287	3746	1878	1868	1908	608	403	755	1203.06	1616.24	843	304	16.326	17.914	35.838
s_1_1_NewScaffoldedContig_241	591	1485	710	775	0	6	885	581			1410	776	195.883	243.446	43.486
s_1_1_NewScaffoldedContig_242	2821	655	348	307	252	56	165	176	425.365	347.626	129	52	17.362	15.682	29.918
s_1_1_NewScaffoldedContig_243	26645	6392	2734	3658	2358	620	1644	1697	1270.96	1724.87	2594	1602	18.959	78.702	27.131
s_1_1_NewScaffoldedContig_244	13977	4633	2294	2339	2720	466	350	1042	1185.65	1490.03	993	67	25.502	15.961	41.847
s_1_1_NewScaffoldedContig_245	6803	4424	2200	2224	2166	348	547	1306	1236.12	1361.5	1081	83	42.249	16.901	63.766
s_1_1_NewScaffoldedContig_246	44517	6375	3166	3209	3346	1220	457	1208	1159.14	1544.52	1043	41	12.388	7.351	32.147
s_1_1_NewScaffoldedContig_247	2772	659	308	351	260	100	139	154	401.754	298.408	95	42	19.746	9.221	40.368
s_1_1_NewScaffoldedContig_248	24677	5815	2947	2868	3486	604	325	1329	1445.5	1623.23	845	51	17.205	7.493	50.209
s_1_1_NewScaffoldedContig_249	5446	99538	53216	46322	29216	14746	16408	38145	337.445	82.097	49996	2635	1320.4	1004.61	36.945
s_1_1_NewScaffoldedContig_250	23989	7050	3513	3537	3996	922	409	1620	1425.98	1727.71	1551	132	22.798	11.674	42.686
s_1_1_NewScaffoldedContig_251	48859	7882	3908	3974	4534	1384	372	1403	1190.69	1582.76	1418	52	13.977	8.305	33.668
s_1_1_NewScaffoldedContig_252	22942	6640	3381	3259	3810	928	426	1386	1281	1613.68	959	53	22.935	10.161	41.156
s_1_1_NewScaffoldedContig_253	14078	2772	1418	1354	840	304	689	905	878.133	1271.29	1104	295	14.887	25.569	26.289
s_1_1_NewScaffoldedContig_254	28749	5375	2728	2647	3052	862	319	1057	1158.75	1566.56	996	57	15.758	9.523	33.215
s_1_1_NewScaffoldedContig_255	29154	5736	2854	2882	3114	938	440	1143	1333.82	1706.63	952	49	16.114	10.862	32.572
s_1_1_NewScaffoldedContig_256	5887	376	176	200	96	78	87	108	456.75	431.852	79	24	5.338	6.212	20.384
s_1_1_NewScaffoldedContig_257	5405	2338	1176	1162	1056	270	482	494	757.877	985.387	453	63	32.557	10.019	49.177
s_1_1_NewScaffoldedContig_258	1554	708	381	327	236	46	241	175	332.915	26.878	197	74	34.324	13.794	48.327
s_1_1_NewScaffoldedContig_259	43986	11796	5928	5868	7304	1790	360	2167	1401.48	1720.93	2633	59	22.019	9.354	41.747
s_1_1_NewScaffoldedContig_260	14983	5734	2782	2952	3276	660	414	1311	1267.77	1567.46	1194	78	29.504	11.774	46.353
s_1_1_NewScaffoldedContig_261	11472	2070	1058	1012	1138	406	163	328	1018.33	1379.52	397	48	15.415	7.26	37.012
s_1_1_NewScaffoldedContig_262	21922	6503	3269	3234	4002	814	383	1202	1397.76	1704.21	1205	63	23.669	9.331	44.736
s_1_1_NewScaffoldedContig_263	1964	543	274	269	160	38	185	155	407.088	315.696	95	33	18.507	5.955	60.489
s_1_1_NewScaffoldedContig_264	27619	3774	1871	1903	1972	616	246	826	1088.57	1454.17	703	43	11.794	7.56	32.166
s_1_1_NewScaffoldedContig_265	18305	2013	1010	1003	906	316	298	463	893.408	1359.65	403	61	9.073	9.928	22.748
s_1_1_NewScaffoldedContig_266	764	151	80	71	48	26	51	24	334.75	29.678	32	30	15.531	6.479	44.895
s_1_1_NewScaffoldedContig_267	10241	2226	1111	1115	1160	366	241	420	1014.46	1406	401	46	18.234	10.119	37.955
s_1_1_NewScaffoldedContig_268	57387	17903	8987	8916	11392	2508	418	3319	1361.17	1644.79	3459	58	24.97	8.209	45.38
s_1_1_NewScaffoldedContig_269	6077	2119	1065	1054	1012	302	303	469	875.259	1219.96	510	57	27.584	8.741	46.339
s_1_1_NewScaffoldedContig_270	979	311	149	162	98	54	103	42	328.388	31.836	163	67	31.312	16.525	36.466
s_1_1_NewScaffoldedContig_271	2100	3443	1572	1871	124	66	1464	1770	383.726	248.397	2682	1375	114.381	242.49	51.333
s_1_1_NewScaffoldedContig_272	14637	6536	3351	3185	3216	590	820	1839	1209.63	1489.36	1572	156	31.079	20.424	44.299
s_1_1_NewScaffoldedContig_273	7304	1022	511	511	468	178	122	229	779.833	1148.36	157	34	12.178	7.765	31.873
s_1_1_NewScaffoldedContig_274	25070	4546	2280	2266	2698	780	242	729	1417.43	1778.54	1004	44	15.374	7.371	37.391
s_1_1_NewScaffoldedContig_275	929	187	84	103	40	16	75	56	333.6	34.241	36	27	14.154	5.466	38.428
s_1_1_NewScaffoldedContig_276	14868	3871	1910	1961	2312	510	297	692	1109.72	1464.9	779	55	21.091	12.076	39.01
s_1_1_NewScaffoldedContig_277	9823	1965	970	995	550	212	552	621	823.556	1259.69	1045	367	16.29	34.897	27.12
s_1_1_NewScaffoldedContig_278	13794	1877	948	929	698	280	308	555	748.834	1094.21	518	167	10.431	12.982	23.271
s_1_1_NewScaffoldedContig_279	17499	3611	1774	1837	1514	520	293	1234	782.931	1134.92	803	64	15.332	15.291	30.482
s_1_1_NewScaffoldedContig_280	22629	7503	3734	3769	4400	960	461	1582	1404.5	1650.26	1551	111	25.589	11.458	45.486
s_1_1_NewScaffoldedContig_281	8704	5302	2652	2650	2944	460	688	1146	1396.48	1521.44	1199	79	40.496	13.145	61.098
s_1_1_NewScaffoldedContig_282	604	100	36	64	0	6	57	36			26	18	8.099	4.348	74.172
s_1_1_NewScaffoldedContig_283	1907	246	125	121	140	18	34	50	336.157	30.137	43	24	11.678	4.807	47.666
s_1_1_NewScaffoldedContig_284	42956	15488	7757	7731	9758	1812	503	3194	1415.68	1672.37	3141	68	28.044	11.202	46.464
s_1_1_NewScaffoldedContig_285	46323	10851	5373	5478	5864	1520	986	2332	1180.81	1529.18	2053	139	18.533	12.777	35.311
s_1_1_NewScaffoldedContig_286	7455	3485	1696	1789	1834	382	406	832	1097.45	1379.01	748	68	32.598	10.216	58.39
s_1_1_NewScaffoldedContig_287	26913	9339	4549	4790	5908	1056	356	1897	1411.42	1644.26	1878	64	26.697	11.341	46.762
s_1_1_NewScaffoldedContig_288	5753	1117	555	562	530	220	149	191	767.608	1128.48	212	38	17.197	5.903	37.128
s_1_1_NewScaffoldedContig_289	8220	26009	13647	12362	1206	840	8376	15351	384.048	250.775	22364	11182	228.469	1077.86	25.669
s_1_1_NewScaffoldedContig_290	19734	6640	3294	3346	3118	636	1095	1713	1132.2	1444.55	1350	71	24.154	19.244	35.305
s_1_1_NewScaffoldedContig_291	15406	2691	1330	1361	1468	566	188	420	1188.32	1581.97	415	38	15.118	6.005	36.505
s_1_1_NewScaffoldedContig_292	717	130	51	79	14	0	55	61	351.286	24.72	23	31	12.011	8.774	34.449
s_1_1_NewScaffoldedContig_293	21180	6221	3171	3050	3608	756	458	1312	1205.29	1511.98	1254	60	23.001	14.076	39.5
s_1_1_NewScaffoldedContig_294	44286	9486	4814	4672	4766	1440	703	2422	1177.24	1539.67	2193	555	17.2	20.258	33.408
s_1_1_NewScaffoldedContig_295	24407	5045	2450	2595	2844	832	305	941	1287.2	1657.36	1102	49	17.636	8.188	38.276
s_1_1_NewScaffoldedContig_296	15264	974	471	503	378	188	154	224	504.709	731.742	163	29	5.507	6.7	16.529
s_1_1_NewScaffoldedContig_297	19350	4126	2084	2042	2196	548	410	908	1015.64	1355.52	727	63	17.197	10.294	35.318
s_1_1_NewScaffoldedContig_298	39491	12521	6231	6290	7038	1454	720	3165	1343.53	1633.42	2875	68	24.2	14.501	40.333
s_1_1_NewScaffoldedContig_299	4665	950	454	496	338	216	119	260	424.509	362.455	189	41	16.889	6.895	38.264
s_1_1_NewScaffoldedContig_300	74573	20404	10318	10086	11904	2690	1316	4194	1466.13	1734.14	4341	834	21.714	27.186	39.529
s_1_1_NewScaffoldedContig_301	1620	845	432	413	228	62	267	282	328.605	26.467	243	99	35.56	13.195	51.605
s_1_1_NewScaffoldedContig_302	64599	15408	7725	7683	8688	2084	1056	3328	1384.06	1652.83	3354	211	18.654	12.85	39.863
s_1_1_NewScaffoldedContig_303	500	143	72	71	2	6	65	68	317	0	91	72	17.608	18.843	43.8
s_1_1_NewScaffoldedContig_304	1460	251	116	135	60	46	59	83	343.867	26.268	45	35	13.771	7.463	36.644
s_1_1_NewScaffoldedContig_305	41224	8315	4145	4170	4544	1308	506	1791	1252.43	1583.21	1407	54	15.837	9.449	40.573
s_1_1_NewScaffoldedContig_306	7719	3975	2020	1955	1942	408	502	1084	1471.49	1658.65	971	77	32.695	12.336	63.7
s_1_1_NewScaffoldedContig_307	4568	2792	1410	1382	1244	258	551	713	779.735	812.806	566	143	43.578	25.299	52.824
s_1_1_NewScaffoldedContig_308	18644	2261	1101	1160	1084	376	259	480	1111.94	1596.29	560	107	10.291	10.534	24.249
s_1_1_NewScaffoldedContig_309	13992	3002	1500	1502	1252	384	526	771	974.93	1406.2	1006	557	18.304	37.105	38.086
s_1_1_NewScaffoldedContig_310	21263	3408	1634	1774	1474	464	592	828	874.864	1230.98	779	177	12.858	13.804	30.687
s_1_1_NewScaffoldedContig_311	29883	9332	4690	4642	5376	1202	546	2092	1382.49	1666.75	2113	62	23.901	13.732	41.328
s_1_1_NewScaffoldedContig_312	4963	1969	996	973	866	218	331	526	690.829	881.391	454	96	30.06	12.092	50.03
s_1_1_NewScaffoldedContig_313	28239	9001	4506	4495	4824	1152	664	2249	1296.15	1572.25	1906	68	24.615	11.867	43.521
s_1_1_NewScaffoldedContig_314	1646	830	419	411	300	64	226	233	336.927	28.475	170	57	36.803	10.718	50.243
s_1_1_NewScaffoldedContig_315	1538	560	298	262	152	58	189	155	332.697	30.133	135	51	25.897	7.773	52.861
s_1_1_NewScaffoldedContig_316	10247	2158	1133	1025	1098	392	248	377	1034.55	1460.74	415	52	17.843	9.066	37.367
s_1_1_NewScaffoldedContig_317	45186	6842	3374	3468	3790	1306	282	1319	1240.39	1620.45	958	39	13.054	6.928	33.935
s_1_1_NewScaffoldedContig_318	11023	3418	1738	1680	1876	536	278	678	1130.49	1435.28	693	49	24.929	8.071	44.117
s_1_1_NewScaffoldedContig_319	9787	1447	709	738	744	232	143	297	1063.68	1511.64	259	46	12.671	9.25	31.859
s_1_1_NewScaffoldedContig_320	30404	6870	3459	3411	4324	1018	252	1123	1320.47	1674.18	1283	58	19.263	7.838	39.955
s_1_1_NewScaffoldedContig_321	13607	2335	1233	1102	1186	372	156	563	1303.79	1616.32	381	49	13.717	8.686	36.297
s_1_1_NewScaffoldedContig_322	45827	10587	5232	5355	6142	1396	623	2262	1389.3	1693.34	1961	60	18.291	11.878	36.367
s_1_1_NewScaffoldedContig_323	47869	15522	7737	7785	9392	1896	488	3537	1474.04	1668.44	3533	92	24.423	13.149	42.811
s_1_1_NewScaffoldedContig_324	62702	16484	8260	8224	9268	2282	1312	3399	1390.89	1690.6	3859	414	20.816	16.034	39.214
s_1_1_NewScaffoldedContig_325	10285	3522	1761	1761	1970	436	316	745	1295.63	1568.25	701	57	26.818	10.003	43.316
s_1_1_NewScaffoldedContig_326	17477	7422	3707	3715	4362	788	525	1645	1442.16	1650.07	1422	78	31.283	11.301	51.313
s_1_1_NewScaffoldedContig_327	52719	8722	4308	4414	4934	1396	478	1722	1254.18	1634.51	1684	121	14.04	8.532	34.618
s_1_1_NewScaffoldedContig_328	22607	3237	1654	1583	1662	600	256	648	890.219	1318.13	558	50	12.529	7.981	32.255
s_1_1_NewScaffoldedContig_329	36881	13351	6633	6718	8270	1730	458	2712	1497.97	1749.94	3315	65	28.394	9.328	46.493
s_1_1_NewScaffoldedContig_330	12316	4397	2197	2200	2434	588	327	1000	1339.74	1604.55	916	60	27.377	8.747	47.337
s_1_1_NewScaffoldedContig_331	12085	886	483	403	470	162	55	189	1084.24	1548.48	149	23	6.307	5.751	26.703
s_1_1_NewScaffoldedContig_332	65596	19405	9701	9704	11596	2644	706	4155	1494.18	1735.71	4064	354	23.169	15.022	39.993
s_1_1_NewScaffoldedContig_333	2613	604	292	312	194	114	122	164	333.619	26.297	115	41	18.103	6.776	44.661
s_1_1_NewScaffoldedContig_334	36381	6343	3117	3226	3104	970	687	1466	1084.83	1496.16	990	52	14.371	11.156	29.881
s_1_1_NewScaffoldedContig_335	9158	2369	1194	1175	1220	396	270	438	982.32	1423.12	519	56	21.659	10.15	40.118
s_1_1_NewScaffoldedContig_336	2546	1392	663	729	330	192	313	546	344.552	115.16	288	71	37.166	12.705	52.632
s_1_1_NewScaffoldedContig_337	22704	3595	1765	1830	1916	580	315	713	1259.99	1648.52	694	45	13.314	8.437	33.386
s_1_1_NewScaffoldedContig_338	29551	5229	2585	2644	2950	804	286	1070	1340.57	1692.87	812	48	14.683	8.992	34.699
s_1_1_NewScaffoldedContig_339	4718	1470	718	752	640	200	320	290	622.809	757.576	324	60	24.67	8.36	45.719
s_1_1_NewScaffoldedContig_340	2584	489	255	234	214	90	87	87	335.477	25.145	71	29	16.786	5.725	39.899
s_1_1_NewScaffoldedContig_341	25221	4112	2057	2055	2322	628	286	787	1099.89	1489.38	839	45	13.958	9.602	32.473
s_1_1_NewScaffoldedContig_342	21450	5956	2980	2976	3532	826	285	1215	1392.43	1678.11	1193	60	22.263	11.256	40.597
s_1_1_NewScaffoldedContig_343	35479	5318	2642	2676	2922	1066	248	966	1255.03	1609.43	929	47	12.951	7.363	33.363
s_1_1_NewScaffoldedContig_344	119440	22298	11190	11108	12592	3632	1215	4466	1363	1705.74	3950	173	15.406	10.439	35.098
s_1_1_NewScaffoldedContig_345	19046	4348	2202	2146	2500	712	276	776	1127.42	1545.8	958	48	19.231	7.693	41.599
s_1_1_NewScaffoldedContig_346	30245	6068	3080	2988	3720	1148	145	929	1196.91	1568.55	1369	49	17.41	6.742	39.464
s_1_1_NewScaffoldedContig_347	14710	8785	4347	4438	5194	790	648	2073	1632.74	1714.53	1698	82	40.368	12.152	57.498
s_1_1_NewScaffoldedContig_348	7030	3220	1601	1619	1552	338	526	771	1188.3	1428.97	578	66	32.717	11.035	50.91
s_1_1_NewScaffoldedContig_349	15129	2231	1130	1101	1094	378	298	416	824.437	1222	357	44	12.394	9.122	30.121
s_1_1_NewScaffoldedContig_350	55582	17349	8695	8654	10812	2436	531	3298	1411.02	1690.32	2699	58	24.807	9.57	45.007
s_1_1_NewScaffoldedContig_351	15897	4657	2258	2399	2512	606	483	997	1292.56	1648.73	1087	59	22.648	13.931	38.611
s_1_1_NewScaffoldedContig_352	4190	1203	622	581	358	142	354	334	436.441	403.612	509	235	22.398	28.114	39.427
s_1_1_NewScaffoldedContig_353	3610	51816	26489	25327	14936	5924	11312	19161	344.044	132.964	21943	2460	972.684	618.214	46.343
s_1_1_NewScaffoldedContig_354	53757	8264	4158	4106	4504	1300	687	1600	1244.54	1647.62	2036	217	13.032	11.463	31.464
s_1_1_NewScaffoldedContig_355	5367	1217	593	624	590	184	195	227	701.264	848.078	289	42	18.739	6.73	42.463
s_1_1_NewScaffoldedContig_356	44756	13540	6801	6739	8670	1746	507	2434	1463.86	1714.2	2399	63	23.895	9.989	45.429
s_1_1_NewScaffoldedContig_357	13636	3402	1697	1705	1964	510	258	590	1143.48	1535.89	814	48	21.402	9.055	41.09
s_1_1_NewScaffoldedContig_358	40159	8541	4165	4376	5212	1252	327	1583	1290.58	1646.31	1625	49	17.863	9.339	37.75
s_1_1_NewScaffoldedContig_359	1836	324	147	177	134	54	74	56	339.985	25.981	65	32	15.595	5.257	38.29
s_1_1_NewScaffoldedContig_360	29028	11323	5686	5637	6390	1220	898	2703	1474.39	1724.1	2678	304	28.991	19.498	42.593
s_1_1_NewScaffoldedContig_361	10286	1583	791	792	836	298	115	291	1074.44	1457.13	302	37	13.422	6.814	34.727
s_1_1_NewScaffoldedContig_362	9845	2560	1239	1321	1362	396	224	520	1277.4	1585.33	466	47	21.068	7.969	41.991
s_1_1_NewScaffoldedContig_363	40206	5416	2691	2725	2336	998	563	1417	1090.44	1537.76	1249	139	11.235	9.878	28.511
s_1_1_NewScaffoldedContig_364	3475	658	349	309	210	70	156	200	444.657	418.482	248	172	15.248	17.693	34.878
s_1_1_NewScaffoldedContig_365	62186	27244	13832	13412	13714	2792	3639	6786	1477.46	1698.51	8545	5030	33.83	158.838	44.75
s_1_1_NewScaffoldedContig_366	53053	7469	3744	3725	4124	1278	461	1430	1152.26	1563.15	1189	72	12.241	8.854	30.257
s_1_1_NewScaffoldedContig_367	2027	605	301	304	222	82	147	141	337.991	27.214	124	45	24.778	9.485	45.634
s_1_1_NewScaffoldedContig_368	4759	1474	777	697	652	202	269	331	590.255	718.235	343	62	24.57	9.843	42.509
s_1_1_NewScaffoldedContig_369	23453	7645	3820	3825	4658	874	438	1577	1546.74	1732.07	1360	62	24.747	9.832	47.367
s_1_1_NewScaffoldedContig_370	11738	2678	1383	1295	1356	374	298	610	1094.63	1449.01	636	147	18.846	15.148	36.361
s_1_1_NewScaffoldedContig_371	21897	7033	3452	3581	4178	940	334	1490	1261.44	1601.91	1658	58	25.763	9.671	45.399
s_1_1_NewScaffoldedContig_372	530	97	55	42	22	16	30	28	325	24.196	16	25	14.24	5.188	39.811
s_1_1_NewScaffoldedContig_373	2877	669	378	291	210	92	157	200	378.4	276.137	162	72	19.076	10.061	38.86
s_1_1_NewScaffoldedContig_374	1764	1194	574	620	338	80	346	419	330.071	28.734	207	68	44.739	11.707	62.585
s_1_1_NewScaffoldedContig_375	1038	23783	11952	11831	818	760	7400	14588	323.447	31.261	17598	5619	1551.94	1515.23	34.489
s_1_1_NewScaffoldedContig_376	14141	3299	1667	1632	1664	502	380	708	1177.77	1520.77	613	51	18.528	10.829	38.795
s_1_1_NewScaffoldedContig_377	16477	3396	1717	1679	2066	596	104	560	1116.86	1544.63	813	45	17.913	7.217	38.982
s_1_1_NewScaffoldedContig_378	25435	2786	1420	1366	1376	512	263	573	889.06	1272.3	591	43	9.607	8.579	23.987
s_1_1_NewScaffoldedContig_379	41767	5754	2884	2870	2792	804	635	1420	1044.61	1389	1091	65	10.936	11.204	30.732
s_1_1_NewScaffoldedContig_380	9907	2924	1327	1597	1240	332	279	1046	1322.62	1574.49	782	67	19.241	16.406	38.75
s_1_1_NewScaffoldedContig_381	10471	3125	1574	1551	608	264	889	1319	924.882	1376.53	1221	1654	18.736	101.772	30.045
s_1_1_NewScaffoldedContig_382	20698	2958	1468	1490	1324	544	312	722	1348.24	1725.04	639	226	12.126	14.824	28.259
s_1_1_NewScaffoldedContig_383	9736	2635	1246	1389	1118	222	614	645	875.231	1263.91	433	68	19.918	18.602	29.571
s_1_1_NewScaffoldedContig_384	1975	920	465	455	316	102	229	264	347.962	120.115	162	60	35.033	13.416	49.266
s_1_1_NewScaffoldedContig_385	42638	9758	4830	4928	5618	1540	405	2019	1409.07	1707.6	1574	61	18.59	10.142	37.945
s_1_1_NewScaffoldedContig_386	1812	339	159	180	144	58	67	63	329.25	25.822	60	48	16.551	9.785	39.404
s_1_1_NewScaffoldedContig_387	15082	2182	1074	1108	1148	362	189	435	1091.29	1510.42	328	38	12.225	10.099	27.085
s_1_1_NewScaffoldedContig_388	4004	829	409	420	348	136	114	218	450.402	406.847	127	44	17.201	10.403	34.166
s_1_1_NewScaffoldedContig_389	12757	4608	2412	2196	2536	544	341	1122	1376.93	1648.32	1034	73	27.244	13.696	46.179
s_1_1_NewScaffoldedContig_390	15901	3111	1598	1513	1806	536	215	481	1147.2	1554.26	650	38	17.164	6.727	37.658
s_1_1_NewScaffoldedContig_391	5576	242	109	133	102	48	37	50	684.843	1200.8	41	23	3.896	5.349	16.284
s_1_1_NewScaffoldedContig_392	6150	2035	985	1050	714	220	507	570	791.611	1161.78	742	350	24.884	31.958	37.805
s_1_1_NewScaffoldedContig_393	16969	4760	2358	2402	2724	644	426	900	1297.28	1576.52	982	61	22.4	9.466	43.827
s_1_1_NewScaffoldedContig_394	61242	13067	6482	6585	7754	2162	506	2407	1242.69	1586.09	2650	121	17.876	9.789	37.982
s_1_1_NewScaffoldedContig_395	2137	233	116	117	128	24	21	51	396.469	288.202	58	21	10.121	4.261	46.607
s_1_1_NewScaffoldedContig_396	11510	2245	1153	1092	982	342	357	531	921.536	1289.48	479	56	15.543	11.468	33.258
s_1_1_NewScaffoldedContig_397	27655	6285	3126	3159	3784	950	263	1182	1369.09	1719.49	1198	55	18.991	10.376	37.921
s_1_1_NewScaffoldedContig_398	9801	843	393	450	334	140	131	228	508.335	676.826	120	31	6.829	6.61	26.742
s_1_1_NewScaffoldedContig_399	503	597	343	254	16	22	99	456	360.25	9.484	425	242	63.28	54.007	56.66
s_1_1_NewScaffoldedContig_400	67519	10817	5358	5459	6518	1406	400	2326	1495.61	1747.65	1573	41	12.475	7.514	40.549
s_1_1_NewScaffoldedContig_401	12262	6107	3063	3044	3366	574	603	1494	1431.67	1611.47	1363	74	34.158	16.544	51.835
s_1_1_NewScaffoldedContig_402	3865	1024	525	499	382	162	241	210	464.199	466.653	237	50	21.54	8.097	41.527
s_1_1_NewScaffoldedContig_403	2227	744	362	382	264	76	209	184	357.015	209.9	191	45	26.462	7.705	48.137
s_1_1_NewScaffoldedContig_404	48343	13364	6655	6709	8012	1914	621	2603	1365.25	1673.16	2515	112	22.212	10.107	41.892
s_1_1_NewScaffoldedContig_405	6680	756	398	358	316	132	116	179	722.114	1158.1	145	39	9.244	9.08	24.835
s_1_1_NewScaffoldedContig_406	2167	233	110	123	130	22	28	46	337.846	29.812	36	20	10.251	4.512	40.794
s_1_1_NewScaffoldedContig_407	32928	6246	3179	3067	1660	766	1634	2090	950.616	1397.59	3014	898	15.293	49.973	26.525
s_1_1_NewScaffoldedContig_408	48136	24073	12183	11890	15410	2378	897	5150	1614.68	1712.4	5332	345	36.112	14.958	52.194
s_1_1_NewScaffoldedContig_409	14640	3073	1537	1536	1690	490	207	633	1037.48	1449.59	428	47	17.78	9.223	36.585
s_1_1_NewScaffoldedContig_410	108566	28581	14388	14193	17320	3864	1041	5902	1400.87	1680.21	5153	79	21.06	10.261	40.865
s_1_1_NewScaffoldedContig_411	31882	5295	2606	2689	3172	634	277	1143	1422.13	1669.81	749	40	12.757	6.719	43.225
s_1_1_NewScaffoldedContig_412	14278	2584	1268	1316	1238	394	267	642	1104.22	1448.87	618	95	14.826	13.271	27.938
s_1_1_NewScaffoldedContig_413	15457	3112	1576	1536	1650	580	178	644	1069.75	1444.17	663	45	17.319	8.069	38.17
s_1_1_NewScaffoldedContig_414	28129	5537	2805	2732	3230	940	207	1049	1282.46	1656.63	870	51	16.916	8.212	37.161
s_1_1_NewScaffoldedContig_415	6809	2461	1242	1219	1390	346	232	460	1044.13	1373.93	574	56	29.244	7.664	46.585
s_1_1_NewScaffoldedContig_416	36962	7152	3590	3562	3716	1082	584	1660	1182.49	1577.45	1438	77	15.656	11.383	31.665
s_1_1_NewScaffoldedContig_417	40258	9290	4580	4710	5126	1428	582	1990	1315.53	1651.16	1817	539	18.858	19.607	39.269
s_1_1_NewScaffoldedContig_418	45444	4327	2108	2219	2062	790	442	904	1029.83	1447.58	867	47	8.365	8.194	23.455
s_1_1_NewScaffoldedContig_419	19471	8414	4247	4167	5194	742	610	1760	1596.47	1692.56	1393	68	30.92	12.192	52.19
s_1_1_NewScaffoldedContig_420	35350	13694	6903	6791	8664	1674	403	2765	1494.11	1703	3089	93	29.675	11.719	47.615
s_1_1_NewScaffoldedContig_421	6337	3516	1720	1796	1764	278	516	912	1041.36	1254.76	852	65	38.767	10.913	56.888
s_1_1_NewScaffoldedContig_422	11823	5790	2965	2825	3238	550	425	1516	1442.99	1610.29	1279	72	34.411	10.846	53.886
s_1_1_NewScaffoldedContig_423	38682	6533	3305	3228	3478	1126	433	1364	1281.68	1633.7	1156	61	14.15	8.577	34.383
s_1_1_NewScaffoldedContig_424	3174	225	115	110	84	36	27	69	394.881	305.486	45	28	6.475	6.637	21.991
s_1_1_NewScaffoldedContig_425	1680	277	137	140	136	16	22	100	333.735	30.734	50	29	13.196	5.133	50.298
s_1_1_NewScaffoldedContig_426	33502	13108	6613	6495	8290	1534	401	2697	1569.9	1722.33	2426	66	29.339	10.946	48.254
s_1_1_NewScaffoldedContig_427	2004	402	198	204	112	72	90	121	340.089	25.553	49	36	15.939	7.882	37.226
s_1_1_NewScaffoldedContig_428	553	990	528	462	4	14	439	525	367	18	417	299	104.443	88.651	41.41
s_1_1_NewScaffoldedContig_429	11915	26771	12542	14229	2516	1332	7683	14850	334.649	76.288	19419	4918	138.173	427.035	25.43
s_1_1_NewScaffoldedContig_430	2065	19929	10003	9926	274	140	5414	13766	353.628	147.065	17264	9293	467.249	1443.17	50.751
s_1_1_NewScaffoldedContig_431	33901	11995	6088	5907	7642	1562	349	2276	1443.42	1689.44	2200	66	27.605	10.597	46.931
s_1_1_NewScaffoldedContig_432	7221	4371	2147	2224	2136	356	587	1247	1142.78	1322.01	930	87	40.302	15.884	56.585
s_1_1_NewScaffoldedContig_433	1791	712	344	368	128	52	200	325	341.047	29.5	103	56	26.513	12.547	49.805
s_1_1_NewScaffoldedContig_434	8457	4629	2285	2344	2468	492	507	1101	1163.62	1412.89	971	71	39.107	10.115	56.438
s_1_1_NewScaffoldedContig_435	22012	10453	5396	5057	5970	952	567	2843	1423.15	1593.46	2366	105	32.558	19.716	46.434
s_1_1_NewScaffoldedContig_436	948	909	439	470	48	22	466	366	341.583	28.728	819	595	82.172	154.088	38.924
s_1_1_NewScaffoldedContig_437	11497	909	485	424	382	124	146	244	916.524	1446.62	152	45	6.426	9.228	15.578
s_1_1_NewScaffoldedContig_438	19732	3301	1685	1616	1772	528	247	683	977.922	1473.38	788	48	14.676	8.58	33.879
s_1_1_NewScaffoldedContig_439	528	54	27	27	8	8	16	21	345	22.057	10	20	7.875	4.76	36.174
s_1_1_NewScaffoldedContig_440	2181	997	483	514	362	102	260	256	412.459	338.908	215	57	34.282	9.634	50.16
s_1_1_NewScaffoldedContig_441	29827	8362	4114	4248	4724	1060	681	1783	1219.92	1570.85	1667	61	22.213	13.581	37.127
s_1_1_NewScaffoldedContig_442	37706	7099	3583	3516	3626	1296	662	1380	1233.64	1614.92	1683	438	15.883	19.853	36.143
s_1_1_NewScaffoldedContig_443	2988	1225	597	628	446	112	341	315	523.83	520.625	299	58	29.269	11.919	50
s_1_1_NewScaffoldedContig_444	2607	1629	765	864	322	100	604	593	382.168	283.876	749	512	39.117	60.37	50.441
s_1_1_NewScaffoldedContig_445	24864	2653	1328	1325	1302	550	198	544	1156.06	1648.29	455	37	9.28	7.929	24.767
s_1_1_NewScaffoldedContig_446	23957	12693	6372	6321	7784	1308	569	2889	1586.83	1672.74	2793	110	37.35	13.101	55.124
s_1_1_NewScaffoldedContig_447	38463	5585	2803	2782	2988	776	525	1176	1233.84	1657.1	1104	92	12.032	9.747	28.537
s_1_1_NewScaffoldedContig_448	11542	1652	829	823	840	272	170	329	824.529	1130.62	248	41	12.35	11.48	23.748
s_1_1_NewScaffoldedContig_449	18147	6625	3996	2629	2998	714	694	2125	1286.27	1600.9	1886	815	24.539	34.442	42.238
s_1_1_NewScaffoldedContig_450	2153	226	121	105	118	20	30	56	352.814	156.053	34	28	8.952	6.241	42.127
s_1_1_NewScaffoldedContig_451	16057	4055	2069	1986	1986	504	548	956	1415.46	1677.51	947	348	19.138	20.256	37.305
s_1_1_NewScaffoldedContig_452	1362	654	314	340	182	42	148	277	337.099	32.735	188	61	31.929	10.361	59.104
s_1_1_NewScaffoldedContig_453	5636	1079	549	530	556	174	130	192	514.871	719.628	262	37	17.149	5.755	38.857
s_1_1_NewScaffoldedContig_454	6401	1780	883	897	886	254	213	402	802.384	1132.56	320	58	22.601	9.787	42.915
s_1_1_NewScaffoldedContig_455	16312	4990	2455	2535	3058	724	250	869	1373.74	1671.58	1009	57	24.818	8.103	44.709
s_1_1_NewScaffoldedContig_456	5711	1655	829	826	744	208	297	377	765.247	936.736	362	57	22.733	9.523	45.929
s_1_1_NewScaffoldedContig_457	9090	2905	1423	1482	1282	300	436	857	977.81	1331.96	600	92	23.683	19.147	34.004
s_1_1_NewScaffoldedContig_458	98699	21882	10907	10975	13326	3382	962	3822	1323.95	1662.58	4394	113	18.46	9.426	38.376
s_1_1_NewScaffoldedContig_459	29520	8315	4071	4244	5012	1172	407	1584	1370.97	1687.18	1765	57	22.688	9.737	43.249
s_1_1_NewScaffoldedContig_460	97338	18804	9402	9402	10598	3018	915	3920	1260.57	1641.07	3850	59	16.102	10.924	33.834
s_1_1_NewScaffoldedContig_461	22031	5256	2616	2640	2920	676	442	1139	1161.18	1538.07	1251	69	18.883	12.899	36.662
s_1_1_NewScaffoldedContig_462	29608	3202	1605	1597	1764	510	215	655	1124.3	1479	448	35	8.926	6.986	31.302
s_1_1_NewScaffoldedContig_463	69232	16289	8135	8154	9754	2474	670	3079	1368.56	1698.29	3349	180	19.6	9.146	39.155
s_1_1_NewScaffoldedContig_464	41099	6090	3122	2968	3084	1080	568	1238	947.045	1345.03	1399	53	12.559	10.355	27.334
s_1_1_NewScaffoldedContig_465	34399	7117	3640	3477	4172	1078	428	1321	1267.2	1618.41	1308	60	16.98	10.881	37.926
s_1_1_NewScaffoldedContig_466	32706	4165	2060	2105	2322	760	104	909	1111.46	1501.56	661	34	10.596	5.746	40.775
s_1_1_NewScaffoldedContig_467	13582	4058	2028	2030	2350	574	240	837	1298.72	1616.63	723	60	24.112	10.483	41.459
s_1_1_NewScaffoldedContig_468	34112	7743	3856	3887	4478	1112	416	1605	1301.23	1621.39	1595	47	18.668	8.344	39.508
s_1_1_NewScaffoldedContig_469	11210	1028	500	528	456	180	139	227	777.162	1257.48	191	31	7.856	7.527	22.917
s_1_1_NewScaffoldedContig_470	35469	10202	5095	5107	6132	1372	420	2133	1376.24	1681.16	2049	57	23.029	9.805	42.482
s_1_1_NewScaffoldedContig_471	80886	16834	8452	8382	10120	2746	636	2978	1279.06	1633.68	4131	70	17.678	9.462	36.684
s_1_1_NewScaffoldedContig_472	27680	5417	2768	2649	3024	874	298	1124	1280.19	1687.66	1171	58	16.416	10.14	34.09
s_1_1_NewScaffoldedContig_473	14466	2712	1297	1415	1358	448	311	532	1081.53	1516.77	539	57	15.901	9.483	34.121
s_1_1_NewScaffoldedContig_474	13840	3123	1545	1578	1670	462	307	634	1214.7	1627.12	668	61	18.337	12.053	32.558
s_1_1_NewScaffoldedContig_475	57330	12090	6174	5916	7338	2016	501	2035	1298.5	1645.18	2142	55	17.78	7.832	39.337
s_1_1_NewScaffoldedContig_476	6704	2454	1233	1221	1268	318	397	432	835.932	1121.28	584	53	29.443	8.767	44.884
s_1_1_NewScaffoldedContig_477	3060	1099	548	551	488	114	269	210	470.279	476.03	181	51	28.339	8.534	43.922
s_1_1_NewScaffoldedContig_478	22192	3494	1761	1733	1902	646	228	639	1087.89	1549.11	600	113	13.798	9.334	31.291
s_1_1_NewScaffoldedContig_479	12142	1819	888	931	788	308	252	449	934.147	1318.87	480	105	12.211	10.163	30.753
s_1_1_NewScaffoldedContig_480	60203	12750	6394	6356	7514	1988	533	2451	1299.51	1658.15	2211	53	17.828	9.137	37.927
s_1_1_NewScaffoldedContig_481	17879	4999	2497	2502	2928	712	267	1028	1364.85	1640.65	831	60	22.151	10.371	41.16
s_1_1_NewScaffoldedContig_482	83618	13716	6900	6816	7814	2482	573	2556	1140.41	1552.79	2233	53	14.178	8.436	33.093
s_1_1_NewScaffoldedContig_483	10845	1932	953	979	930	290	276	392	854.353	1262.22	364	42	14.708	8.833	33.868
s_1_1_NewScaffoldedContig_484	1214	223	111	112	68	28	64	58	333.618	23.654	54	27	14.586	6.073	41.269
s_1_1_NewScaffoldedContig_485	8562	1259	603	656	614	206	174	240	690.14	1006.9	260	41	12.38	8.934	31.348
s_1_1_NewScaffoldedContig_486	23231	6879	3426	3453	4040	862	425	1453	1367.28	1609.88	1540	105	22.994	9.846	44.195
s_1_1_NewScaffoldedContig_487	41369	6079	2952	3127	3070	1022	458	1428	1074.71	1458.92	1228	52	12.085	9.836	29.283
s_1_1_NewScaffoldedContig_488	1157	230	119	111	32	24	75	94	338.688	26.706	48	46	15.014	14.44	38.462
s_1_1_NewScaffoldedContig_489	20902	4911	2541	2370	2954	638	348	871	1308.23	1638.63	878	61	19.427	10.117	38.752
s_1_1_NewScaffoldedContig_490	28427	108009	54660	53349	65568	12992	6481	21436	1384.96	1632.41	20359	3953	296.891	197.438	48.479
s_1_1_NewScaffoldedContig_491	20264	7539	3784	3755	4518	876	424	1616	1436.45	1645.71	1579	62	27.885	10.452	49.324
s_1_1_NewScaffoldedContig_492	27700	3764	1838	1926	1980	598	335	762	1239.78	1648.35	641	40	11.6	8.363	31.412
s_1_1_NewScaffoldedContig_493	11951	2566	1290	1276	1262	348	340	568	935.319	1356.25	659	170	17.576	12.628	40.122
s_1_1_NewScaffoldedContig_494	13788	4448	2225	2223	2308	464	357	1271	1184.94	1454.06	868	69	23.309	14.361	44.343
s_1_1_NewScaffoldedContig_495	9664	878	453	425	396	142	102	225	767.121	1164.85	187	33	7.456	7.518	22.972
s_1_1_NewScaffoldedContig_496	30439	6045	3049	2996	3324	964	331	1320	1239.71	1613.81	1089	60	16.308	10.168	34.991
s_1_1_NewScaffoldedContig_497	1850	169	70	99	68	20	32	44	334.147	33.102	28	19	8.084	3.296	38.919
s_1_1_NewScaffoldedContig_498	510	30	17	13	10	0	4	14	331.4	16.512	7	9	5.275	2.011	32.941
s_1_1_NewScaffoldedContig_499	33537	10299	5087	5212	6296	1310	431	2099	1367.68	1680.07	1975	58	24.529	10.627	42.645
s_1_1_NewScaffoldedContig_500	636	17878	6362	11516	14	218	6165	11391	400.571	22.94	11998	10053	1776.33	2568.56	48.428
s_1_1_NewScaffoldedContig_501	2662	28199	17650	10549	60	184	12114	15663	342.533	35.348	21388	18860	699.85	2748.65	23.14
s_1_1_NewScaffoldedContig_502	1489	230	127	103	68	42	56	57	329.147	28.963	55	37	13.118	6.537	43.721
s_1_1_NewScaffoldedContig_503	8178	2219	1088	1131	1196	298	199	491	924.236	1318.3	508	42	22.339	6.8	42.394
s_1_1_NewScaffoldedContig_504	20310	6019	3014	3005	3476	830	481	1159	1263.41	1571.21	1241	58	23.678	10.842	41.369
s_1_1_NewScaffoldedContig_505	4573	567	288	279	216	114	88	125	411.824	380.656	115	26	11.631	4.852	36.431
s_1_1_NewScaffoldedContig_506	1933	305	138	167	64	70	58	106	330.125	26.709	53	29	13.048	4.92	40.041
s_1_1_NewScaffoldedContig_507	1913	202	110	92	84	18	29	70	341.262	30.086	29	21	8.69	3.796	45.165
s_1_1_NewScaffoldedContig_508	60543	18490	9256	9234	11752	2412	544	3495	1477.79	1721.64	4172	74	24.365	9.609	44.968
s_1_1_NewScaffoldedContig_509	11205	1385	666	719	646	226	169	313	721.56	1039.99	220	52	10.506	11.545	24.061
s_1_1_NewScaffoldedContig_510	17431	3891	1920	1971	2066	622	337	808	1086.26	1466.47	721	59	18.459	8.774	39.47
s_1_1_NewScaffoldedContig_511	2619	674	356	318	220	122	152	168	395.127	312.931	205	87	21.266	10.139	38.87
s_1_1_NewScaffoldedContig_512	5736	530	279	251	180	82	109	147	610.933	1066.31	172	41	7.526	9.178	18.079
s_1_1_NewScaffoldedContig_513	35196	4420	2258	2162	2382	840	271	820	1023.27	1442.29	851	43	10.974	8.659	28.083
s_1_1_NewScaffoldedContig_514	37527	9568	4880	4688	5246	1306	769	2084	1257.73	1598.02	1800	68	20.401	11.573	38.138
s_1_1_NewScaffoldedContig_515	906	270	134	136	60	30	106	73	340.367	26.228	90	50	21.815	12.444	45.364
s_1_1_NewScaffoldedContig_516	36782	8413	4205	4208	4392	1350	657	1883	1165.55	1524.8	1605	352	18.622	18.843	35.754
s_1_1_NewScaffoldedContig_517	29717	1689	838	851	832	262	156	404	1100.38	1554.39	294	32	4.771	5.378	21.806
s_1_1_NewScaffoldedContig_518	5023	1950	982	968	770	164	359	633	655.748	724.754	395	61	27.757	13.411	50.03
s_1_1_NewScaffoldedContig_519	14241	3446	1798	1648	1780	406	486	721	1162.67	1554.93	773	166	19.101	15.903	34.555
s_1_1_NewScaffoldedContig_520	31008	6341	3204	3137	3320	1022	464	1423	1074.4	1444.37	1357	131	16.738	10.454	35.71
s_1_1_NewScaffoldedContig_521	6306	2331	1191	1140	1180	326	348	451	822.683	1049.73	637	52	28.854	7.786	48.779
s_1_1_NewScaffoldedContig_522	15085	1765	894	871	906	368	113	337	910.731	1349.27	321	41	10.488	6.985	28.916
s_1_1_NewScaffoldedContig_523	8663	1296	693	603	534	212	157	366	1127.13	1579.64	244	42	12.415	8.973	29.655
s_1_1_NewScaffoldedContig_524	32657	5387	2670	2717	2788	860	442	1198	1088.18	1482.12	1148	58	13.657	10.446	32.449
s_1_1_NewScaffoldedContig_525	1356	182	101	81	64	26	30	62	342.25	36.508	21	27	11.605	5.941	34.44
s_1_1_NewScaffoldedContig_526	788	311	153	158	40	10	118	141	352.05	38.427	122	64	26.109	17.075	43.909
s_1_1_NewScaffoldedContig_527	4177	2384	1116	1268	212	136	864	1150	342.943	33.846	1865	285	39.674	54.691	31.913
s_1_1_NewScaffoldedContig_528	29428	9059	4513	4546	5100	1078	498	2247	1396.51	1668.99	1819	63	23.68	12.809	41.865
s_1_1_NewScaffoldedContig_529	47431	16644	8233	8411	10110	1860	714	3752	1428.05	1640.49	3753	68	26.185	13.212	44.928
s_1_1_NewScaffoldedContig_530	80437	30294	15216	15078	19208	3690	1300	5728	1521.36	1716.94	6291	228	28.913	13.661	44.925
s_1_1_NewScaffoldedContig_531	65543	14880	7363	7517	8540	2012	981	3081	1417.93	1700.2	2602	103	18.159	12.28	34.966
s_1_1_NewScaffoldedContig_532	6213	1976	1041	935	1118	240	237	352	827.869	1167.25	403	52	25.8	9.285	45.131
s_1_1_NewScaffoldedContig_533	21712	2918	1484	1434	1544	532	201	572	1163.04	1555.35	512	47	11.468	9.279	27.307
s_1_1_NewScaffoldedContig_534	7933	4343	2167	2176	2370	426	477	1021	1349.39	1506.86	916	71	38.001	10.693	55.704
s_1_1_NewScaffoldedContig_535	1278	662	342	320	210	50	182	213	334.171	28.602	174	64	35.8	12.585	63.302
s_1_1_NewScaffoldedContig_536	44263	4426	2189	2237	2476	716	158	1010	1204.19	1569.96	642	30	8.206	5.629	33.588
s_1_1_NewScaffoldedContig_537	6462	279	149	130	84	32	69	85	691.976	879.466	96	44	3.331	6.784	8.991
s_1_1_NewScaffoldedContig_538	37324	10477	5324	5153	6454	1412	339	2096	1373.21	1640.5	2301	56	22.363	11.859	39.203
s_1_1_NewScaffoldedContig_539	499	19392	8952	10440	2	260	4283	14765	329	0	16930	14503	2708.9	4526.81	31.663
s_1_1_NewScaffoldedContig_540	37005	5486	2751	2735	2174	912	947	1346	876.269	1266.64	1477	480	12.058	19.826	26.783
s_1_1_NewScaffoldedContig_541	22506	5660	2991	2669	1338	492	1882	1871	886.728	1358.68	2589	821	18.927	63.16	26.571
s_1_1_NewScaffoldedContig_542	20248	8296	4100	4196	4888	976	457	1859	1514.89	1696.83	1769	65	30.852	11.388	48.039
s_1_1_NewScaffoldedContig_543	4157	1832	978	854	760	184	384	476	661.45	673.848	314	59	31.578	11.679	55.713
s_1_1_NewScaffoldedContig_544	660	215	114	101	36	36	76	66	347.222	35.02	33	48	22.506	11.803	48.03
s_1_1_NewScaffoldedContig_545	52093	14219	7183	7036	8960	2050	377	2595	1370.24	1683.69	3123	55	22.249	8.94	43.227
s_1_1_NewScaffoldedContig_546	3997	2295	1196	1099	640	166	720	740	554.2	567.285	730	490	39.283	48.75	51.564
s_1_1_NewScaffoldedContig_547	602	565	348	217	22	10	294	236	329.364	25.278	344	351	47.764	74.737	54.319
s_1_1_NewScaffoldedContig_548	16487	3029	1571	1458	1502	504	233	733	1196.43	1566.88	630	116	15.037	9.084	35.337
s_1_1_NewScaffoldedContig_549	12256	3681	1856	1825	2136	486	305	691	1317.51	1650.44	784	49	24.098	8.166	44.664
s_1_1_NewScaffoldedContig_550	8887	2789	1446	1343	1416	460	306	578	1151.52	1518.62	603	51	24.306	8.853	43.941
s_1_1_NewScaffoldedContig_551	794	83588	45591	37997	10874	3860	22349	45794	331.016	27.003	46182	24903	7608.98	5967.6	60.202
s_1_1_NewScaffoldedContig_552	1432	1151	545	606	168	52	403	504	330.048	29.814	604	732	44.452	108.975	45.042
s_1_1_NewScaffoldedContig_553	15486	7972	4101	3871	4952	748	401	1786	1587.9	1675.18	1780	81	34.941	11.337	59.008
s_1_1_NewScaffoldedContig_554	27826	4986	2493	2493	2804	904	236	940	1225.62	1602.79	790	48	15.151	7.267	36.775
s_1_1_NewScaffoldedContig_555	16479	2791	1372	1419	1150	400	536	656	1053.63	1471.95	832	309	13.888	21.862	29.268
s_1_1_NewScaffoldedContig_556	1739	423	218	205	168	48	109	94	331.429	33.037	73	51	20.163	11.364	37.033
s_1_1_NewScaffoldedContig_557	1838	11315	5457	5858	2132	744	3919	4417	344.552	81.388	5243	1123	452.595	251.102	45.158
s_1_1_NewScaffoldedContig_558	523	2887	1326	1561	506	160	721	1474	333.024	26.626	679	595	414.252	126.026	48.757
s_1_1_NewScaffoldedContig_559	8586	1126	578	548	526	188	119	262	699.259	1032.46	219	37	11.476	8.178	30.328
s_1_1_NewScaffoldedContig_560	46306	9460	4716	4744	5482	1430	481	1906	1293.82	1665.21	1735	47	17.002	9.008	36.749
s_1_1_NewScaffoldedContig_561	1571	976	447	529	62	60	166	677	345.323	34.732	359	225	35.312	40.681	58.625
s_1_1_NewScaffoldedContig_562	2649	1507	741	766	550	152	349	442	458.833	451.24	299	80	40.622	11.784	51.793
s_1_1_NewScaffoldedContig_563	5889	2263	1182	1081	1042	238	388	558	845.443	1165.57	555	53	29.328	8.543	47.869
s_1_1_NewScaffoldedContig_564	835	394	192	202	38	14	162	174	346.789	34.354	256	127	30.14	28.552	46.587
s_1_1_NewScaffoldedContig_565	29888	9344	4746	4598	5724	1130	432	1936	1442.84	1680.3	1663	70	23.89	12.892	41.632
s_1_1_NewScaffoldedContig_566	16441	3175	1560	1615	1624	472	354	670	1109.23	1511.14	771	74	15.907	9.032	38.38
s_1_1_NewScaffoldedContig_567	3341	1236	584	652	468	128	259	364	486.167	493.678	294	83	27.992	11.958	44.927
s_1_1_NewScaffoldedContig_568	2786	842	462	380	332	90	222	185	432.855	402.283	204	50	24.247	8.433	44.867
s_1_1_NewScaffoldedContig_569	1554	1236	549	687	380	96	373	377	332.016	28.501	371	80	56.894	11.598	49.936
s_1_1_NewScaffoldedContig_570	13550	4118	2119	1999	2444	568	320	711	1229.14	1574.97	848	66	25.019	10.027	43.365
s_1_1_NewScaffoldedContig_571	27467	4669	2373	2296	2794	798	258	711	1304.46	1678.63	831	45	14.624	8.118	36.087
s_1_1_NewScaffoldedContig_572	5565	148	79	69	32	28	34	51	348.438	27.984	34	24	2.098	3.836	12.04
s_1_1_NewScaffoldedContig_573	15463	2270	1143	1127	1170	392	217	431	1099.21	1533.72	494	128	12.929	10.166	31.805
s_1_1_NewScaffoldedContig_574	5300	1232	611	621	390	110	352	367	420.99	344.567	408	74	16.432	19.685	24.396
s_1_1_NewScaffoldedContig_575	2045	1158	528	630	284	98	437	328	336.028	27.121	493	222	39.286	33.125	53.79
s_1_1_NewScaffoldedContig_576	32188	5302	2636	2666	2740	794	525	1128	1123.25	1567.57	971	99	13.948	9.556	31.571
s_1_1_NewScaffoldedContig_577	9982	1313	657	656	316	132	142	710	932.956	1205.37	312	58	8.269	13.151	23.582
s_1_1_NewScaffoldedContig_578	21843	7716	3826	3890	4620	892	541	1553	1347.29	1600.09	1393	71	27.53	10.435	45.259
s_1_1_NewScaffoldedContig_579	63964	12154	6058	6096	6866	2136	639	2259	1296.16	1663.68	2096	60	16.017	9.377	34.763
s_1_1_NewScaffoldedContig_580	5867	1098	571	527	400	94	195	401	747.755	1283.05	301	61	13.548	18.011	20.692
s_1_1_NewScaffoldedContig_581	19011	5988	2951	3037	3368	722	618	1213	1323.15	1610.02	1210	117	24.246	12.567	44.085
s_1_1_NewScaffoldedContig_582	27765	9566	4812	4754	5310	1070	844	2222	1352.86	1609.83	2008	82	25.827	14.485	41.246
s_1_1_NewScaffoldedContig_583	9950	3332	1616	1716	1792	462	296	723	1094.9	1422.01	735	60	26.54	9.119	45.146
s_1_1_NewScaffoldedContig_584	77743	21243	10578	10665	13278	2934	592	4136	1445.04	1705.57	3291	71	21.835	10.146	42.885
s_1_1_NewScaffoldedContig_585	12238	1589	842	747	510	190	291	576	987.169	1258.01	543	145	10.128	13.778	31.116
s_1_1_NewScaffoldedContig_586	9242	1147	571	576	502	186	192	259	638.271	913.641	217	49	10.119	7.987	34.019
s_1_1_NewScaffoldedContig_587	28265	6756	3309	3447	3736	1140	316	1464	1236.89	1602.75	1410	67	19.537	9.83	39.958
s_1_1_NewScaffoldedContig_588	3738	973	475	498	438	112	178	224	441.895	407.085	233	51	21.665	7.919	42.616
s_1_1_NewScaffoldedContig_589	36155	1860	929	931	816	326	183	492	854.904	1347.38	288	31	4.439	5.385	19.638
s_1_1_NewScaffoldedContig_590	40413	4946	2534	2412	2420	972	482	968	1071.25	1513.59	932	77	10.485	9.368	25.425
s_1_1_NewScaffoldedContig_591	14876	2474	1282	1192	1056	462	251	652	917.116	1288.47	439	44	14.005	8.315	34.774
s_1_1_NewScaffoldedContig_592	7384	834	434	400	218	126	198	274	578.606	894.783	248	71	8.969	9.981	24.377
s_1_1_NewScaffoldedContig_593	1923	405	187	218	100	44	127	123	328.84	32.213	122	50	16.875	10.445	39.678
s_1_1_NewScaffoldedContig_594	15840	5359	2730	2629	2470	402	889	1549	1240.61	1506.34	1128	81	21.526	22.783	33.693
s_1_1_NewScaffoldedContig_595	8209	3137	1568	1569	1256	302	637	911	1156.96	1610.01	659	76	24.69	22.723	39.213
s_1_1_NewScaffoldedContig_596	8781	4292	2079	2213	620	314	1887	1440	442.329	607.225	3089	1576	41.842	162.125	30.828
s_1_1_NewScaffoldedContig_597	21732	4296	2106	2190	2340	650	317	906	1262.94	1591.76	1040	124	16.12	10.883	35.952
s_1_1_NewScaffoldedContig_598	14223	1763	923	840	740	324	227	443	848.803	1288.66	314	49	10.092	10.264	25.733
s_1_1_NewScaffoldedContig_599	8045	2700	1377	1323	1474	356	240	590	1138.47	1431.13	596	48	26.003	7.061	46.352
s_1_1_NewScaffoldedContig_600	68747	9196	4542	4654	4374	1804	863	1957	1022.86	1438.24	1548	63	11.454	7.653	31.174
s_1_1_NewScaffoldedContig_601	4570	3010	1507	1503	1190	234	610	943	808.531	817.044	588	90	41.092	16.719	62.998
s_1_1_NewScaffoldedContig_602	54601	12571	6316	6255	7626	1818	541	2383	1369.87	1681.62	2023	63	18.991	9.584	39.349
s_1_1_NewScaffoldedContig_603	23299	8313	4204	4109	4940	1066	473	1718	1292.16	1583.72	1167	66	27.838	12.858	44.985
s_1_1_NewScaffoldedContig_604	5892	1204	593	611	570	174	141	294	740.523	1112.28	277	38	17.374	7.51	38.663
s_1_1_NewScaffoldedContig_605	6650	1984	1029	955	570	328	257	804	743.642	892.638	651	300	17.934	29.711	37.353
s_1_1_NewScaffoldedContig_606	37649	7495	3715	3780	4360	1280	298	1441	1230.21	1562.13	1128	58	16.333	10.49	34.832
s_1_1_NewScaffoldedContig_607	21998	4402	2212	2190	2040	712	661	921	833.445	1227.51	1005	117	16.569	10.994	34.63
s_1_1_NewScaffoldedContig_608	8184	1822	936	886	864	304	244	375	865.738	1245.37	375	113	18.71	10.849	40.726
s_1_1_NewScaffoldedContig_609	32039	6718	3359	3359	3866	1104	489	1140	1112.09	1504.35	1087	54	17.629	9.975	36.115
s_1_1_NewScaffoldedContig_610	695	2369	1339	1030	16	58	1297	985	330.125	37.628	2151	1374	282.642	394.541	38.993
s_1_1_NewScaffoldedContig_611	854	2036	1041	995	20	30	1158	816	338.1	19.644	1808	846	203.659	250.928	44.028
s_1_1_NewScaffoldedContig_612	14019	761	380	381	360	140	77	163	1074.07	1571.18	128	26	4.82	4.47	24.709
s_1_1_NewScaffoldedContig_613	9394	2002	956	1046	842	254	346	538	1019.07	1482.87	495	50	16.641	12.699	31.382
s_1_1_NewScaffoldedContig_614	10832	1132	601	531	460	202	191	249	410.309	346.19	211	42	9.187	9.902	21.658
s_1_1_NewScaffoldedContig_615	16766	16872	7883	8989	3200	1384	5513	6584	490.773	715.706	7549	2719	74.17	229.687	23.19
s_1_1_NewScaffoldedContig_616	11855	2852	1433	1419	1396	440	323	645	986.973	1332.69	611	47	19.57	8.497	42.564
s_1_1_NewScaffoldedContig_617	3342	601	304	297	264	88	90	146	458.068	439.029	131	33	15.286	6.182	40.096
s_1_1_NewScaffoldedContig_618	977	13191	6153	7038	76	106	3573	9323	331.947	25.82	11184	4050	692.241	1069.9	49.642
s_1_1_NewScaffoldedContig_619	17314	2799	1399	1400	1576	528	170	466	1252.21	1626.38	555	46	13.625	8.309	32.049
s_1_1_NewScaffoldedContig_620	18484	8985	4524	4461	5520	964	557	1821	1530.73	1703.03	1678	73	35.638	9.491	52.299
s_1_1_NewScaffoldedContig_621	45044	7528	3709	3819	3482	1182	952	1769	1315.68	1671.67	1956	566	14.257	27.122	31.358
s_1_1_NewScaffoldedContig_622	8909	3336	1646	1690	1730	396	397	761	1316.03	1618.01	576	57	27.861	8.815	48.838
s_1_1_NewScaffoldedContig_623	9202	31799	15848	15951	7822	2920	7874	12821	379.848	268.691	17336	3103	255.575	445.458	18.311
s_1_1_NewScaffoldedContig_624	13716	3372	1774	1598	1974	418	245	683	1219.75	1586.78	696	56	19.756	10.852	41.237
s_1_1_NewScaffoldedContig_625	12750	4327	2235	2092	1520	354	863	1547	622.763	886.362	981	81	23.438	19.054	39.153
s_1_1_NewScaffoldedContig_626	901	518	242	276	126	16	184	185	332.952	24.476	172	71	37.923	18.406	58.824
s_1_1_NewScaffoldedContig_627	29617	7043	3403	3640	3622	940	610	1753	1205.37	1547.62	1487	69	18.445	13.341	36.864
s_1_1_NewScaffoldedContig_628	630	193	98	95	46	12	69	63	344.261	29.467	29	41	23.667	11.904	50.952
s_1_1_NewScaffoldedContig_629	18809	6806	3324	3482	4060	812	334	1520	1465.47	1681.65	1219	73	26.864	13.785	44.883
s_1_1_NewScaffoldedContig_630	30520	9201	4570	4631	5718	1328	309	1720	1376.31	1661.65	1676	54	24.409	7.859	43.195
s_1_1_NewScaffoldedContig_631	12146	7106	3603	3503	3870	626	511	2018	1426.82	1637.4	1550	83	40.94	14.814	52.561
s_1_1_NewScaffoldedContig_632	67336	21524	10883	10641	13390	2840	881	4115	1343.92	1649.26	3647	173	25.417	11.867	42.794
s_1_1_NewScaffoldedContig_633	16538	3833	1941	1892	2164	580	222	789	1225.14	1573.68	796	79	19.017	9.034	39.467
s_1_1_NewScaffoldedContig_634	4917	959	452	507	370	174	182	218	600.011	745.473	167	38	15.831	7.359	39.374
s_1_1_NewScaffoldedContig_635	25205	5764	2930	2834	3192	954	374	1147	1216.86	1600.37	1310	100	18.982	10.414	37.187
s_1_1_NewScaffoldedContig_636	7221	270319	128453	141866	34008	29432	69203	135228	337.906	151.789	125389	12675	2376.49	2611.18	35.757
s_1_1_NewScaffoldedContig_637	27958	7354	3681	3673	4410	1044	348	1424	1336.19	1642.71	1653	59	21.339	9.218	41.67
s_1_1_NewScaffoldedContig_638	10598	2876	1470	1406	1594	444	253	528	1155.28	1552.84	519	47	22.347	7.954	43.178
s_1_1_NewScaffoldedContig_639	22175	6843	3475	3368	3998	856	408	1480	1390.09	1658.82	1355	65	24.397	11.041	44.658
s_1_1_NewScaffoldedContig_640	23327	4290	2176	2114	2234	668	453	851	1029.46	1423.58	709	50	15.225	9.322	36.957
s_1_1_NewScaffoldedContig_641	51029	10106	5114	4992	6300	1442	406	1786	1389.54	1717.6	1862	50	16.478	8.725	37.247
s_1_1_NewScaffoldedContig_642	3549	537	281	256	206	104	82	140	443.612	402.968	130	43	12.427	9.777	29.05
s_1_1_NewScaffoldedContig_643	12848	3315	1696	1619	1442	402	573	867	749.696	1079.68	790	55	19.945	14.921	32.628
s_1_1_NewScaffoldedContig_644	3269	1756	821	935	338	196	243	967	382.343	263	459	117	31.427	17.737	61.334
s_1_1_NewScaffoldedContig_645	1601	10266	5050	5216	608	358	4841	4363	351.727	38.637	5150	1099	424.547	354.199	44.285
s_1_1_NewScaffoldedContig_646	53561	12289	6145	6144	7608	2094	350	2030	1360.02	1715.99	2650	48	19.397	7.54	40.033
s_1_1_NewScaffoldedContig_647	8186	5158	2674	2484	2410	400	640	1642	1309.14	1484.24	1427	521	39.781	30.774	61.678
s_1_1_NewScaffoldedContig_648	11004	4504	2306	2198	2298	328	482	1349	1238.91	1364.62	989	71	26.015	21.319	44.947
s_1_1_NewScaffoldedContig_649	17582	5285	2657	2628	2116	502	1095	1498	941.082	1319.97	1238	76	21.504	19.851	31.731
s_1_1_NewScaffoldedContig_650	3954	2315	1206	1109	822	170	536	749	670.068	697.492	551	82	39.696	15.788	59.535
s_1_1_NewScaffoldedContig_651	1693	1313	692	621	372	84	412	434	372.054	234.527	302	94	51.017	18.008	59.953
s_1_1_NewScaffoldedContig_652	7822	2360	1150	1210	1222	278	180	643	1066.72	1261.5	394	61	22.783	9.978	46.471
s_1_1_NewScaffoldedContig_653	32015	4867	2462	2405	2528	848	427	990	1342.74	1732.11	1022	158	12.594	11.206	29.024
s_1_1_NewScaffoldedContig_654	32150	3899	1970	1929	1952	740	307	822	1052.37	1525.1	751	41	10.279	8.538	26.771
s_1_1_NewScaffoldedContig_655	2549	328	164	164	146	64	67	47	480.644	459.086	34	30	11.235	5.839	34.759
s_1_1_NewScaffoldedContig_656	1473	996	500	496	334	60	317	277	332.467	24.99	219	81	46.405	13.733	55.737
s_1_1_NewScaffoldedContig_657	6633	1717	886	831	730	266	328	371	801.622	1102.63	345	55	21.098	13.189	34.147
s_1_1_NewScaffoldedContig_658	9594	4764	2433	2331	2712	470	518	1005	1301.07	1516.28	880	84	35.677	11.517	54.263
s_1_1_NewScaffoldedContig_659	21924	2534	1262	1272	1136	514	211	606	1015.29	1464.72	531	35	9.996	7.47	27.267
s_1_1_NewScaffoldedContig_660	6248	3396	1807	1589	1606	302	595	854	1021.25	1241.25	808	75	37.855	9.779	56.29
s_1_1_NewScaffoldedContig_661	4891	933	478	455	422	126	165	203	610.209	780.003	152	39	15.716	8.06	40.36
s_1_1_NewScaffoldedContig_662	17052	2127	1057	1070	1068	336	242	450	1015.58	1473.53	346	54	10.134	11.024	22.842
s_1_1_NewScaffoldedContig_663	17775	9507	4769	4738	5820	958	374	2259	1539.46	1689.24	2017	73	38.264	10.331	54.627
s_1_1_NewScaffoldedContig_664	35737	6965	3499	3466	4212	1162	197	1258	1339.64	1698.58	1456	56	16.558	9.683	35.579
s_1_1_NewScaffoldedContig_665	6357	2613	1362	1251	1332	316	381	559	931.167	1249.55	499	70	31.143	9.962	47.522
s_1_1_NewScaffoldedContig_666	2544	756	339	417	272	84	231	156	377.184	279.784	159	48	22.984	8.036	42.414
s_1_1_NewScaffoldedContig_667	17649	3909	1978	1931	2058	584	443	765	1122.88	1528.26	829	55	17.935	11.124	35.294
s_1_1_NewScaffoldedContig_668	15779	1915	940	975	988	362	156	360	1179.65	1595.01	290	42	10.654	8.59	27.207
s_1_1_NewScaffoldedContig_669	25185	9601	4759	4842	5486	1074	673	2240	1417.29	1656.3	2021	262	28.667	14.494	46.794
s_1_1_NewScaffoldedContig_670	8251	1795	884	911	920	308	192	344	979.691	1432.65	333	42	18.548	7.484	38.916
s_1_1_NewScaffoldedContig_671	2840	1613	799	814	596	90	484	425	614.933	620.221	666	245	37.267	26.71	58.873
s_1_1_NewScaffoldedContig_672	14670	3810	1878	1932	2192	456	370	733	1266.06	1573.57	694	59	20.726	9.378	41.847
s_1_1_NewScaffoldedContig_673	6156	130989	70788	60201	11766	4508	36121	77469	339.253	51.144	78569	30027	1322.84	3413.45	15.481
s_1_1_NewScaffoldedContig_674	1434	842	403	439	134	80	293	319	328.687	30.558	439	311	40.331	50.581	37.448
s_1_1_NewScaffoldedContig_675	47694	4795	2383	2412	1728	604	994	1379	848.147	1295.57	1695	379	8.088	17.824	24.307
s_1_1_NewScaffoldedContig_676	8796	2517	1286	1231	1022	382	436	649	982.793	1373.24	829	180	22.627	18.137	40.712
s_1_1_NewScaffoldedContig_677	35080	4946	2507	2439	2416	944	418	1060	1022.25	1418.18	870	37	12.164	8.755	29.473
s_1_1_NewScaffoldedContig_678	22756	4018	2050	1968	2382	630	228	705	1362.11	1708.36	910	42	14.93	7.177	37.792
s_1_1_NewScaffoldedContig_679	40038	6606	3241	3365	3316	918	682	1591	1300.83	1675.19	1526	339	13.284	14.759	29.482
s_1_1_NewScaffoldedContig_680	19656	3495	1732	1763	1868	560	264	729	1206.98	1586.62	649	107	15.004	9.078	36.014
s_1_1_NewScaffoldedContig_681	10054	1913	986	927	1144	270	158	311	1051.76	1408.71	404	44	16.218	7.93	39.308
s_1_1_NewScaffoldedContig_682	38173	13511	6783	6728	8444	1564	705	2634	1479.24	1697.56	2688	71	26.986	13.481	43.054
s_1_1_NewScaffoldedContig_683	11128	5433	2699	2734	2892	604	421	1454	1300.88	1564.63	1115	84	36.035	11.049	51.141
s_1_1_NewScaffoldedContig_684	25444	3406	1669	1737	1750	606	277	681	1147	1583.52	464	35	11.561	7.07	31.453
s_1_1_NewScaffoldedContig_685	69627	21740	10902	10838	13382	3292	479	4250	1423.24	1709.09	4764	63	25.142	9.186	44.23
s_1_1_NewScaffoldedContig_686	16258	2967	1536	1431	1388	418	471	625	1108.31	1580.52	673	137	15.07	12.486	31.425
s_1_1_NewScaffoldedContig_687	12183	5215	2560	2655	2746	604	438	1357	1256.85	1484.11	1019	73	31.802	12.872	46.992
s_1_1_NewScaffoldedContig_688	6888	3425	1688	1737	1874	356	415	742	1122.62	1341.08	760	62	36.456	8.98	52.352
s_1_1_NewScaffoldedContig_689	42851	12965	6419	6546	8030	1780	482	2466	1404.78	1697.35	2352	62	24.251	10.417	42.953
s_1_1_NewScaffoldedContig_690	2283	440	227	213	120	68	151	94	326.95	24.789	92	35	15.516	7.01	40.429
s_1_1_NewScaffoldedContig_691	37225	6208	3156	3052	3132	1072	641	1223	975.3	1380.28	1296	84	14.242	9.712	31.261
s_1_1_NewScaffoldedContig_692	13800	2915	1420	1495	1592	462	154	643	1295.16	1576.68	606	44	17.119	8.069	42.029
s_1_1_NewScaffoldedContig_693	6255	1669	880	789	644	262	338	395	823.326	1109.03	523	274	21.402	23.686	40.336
s_1_1_NewScaffoldedContig_694	61240	28282	14078	14204	18318	3128	597	5889	1626.1	1730.59	4520	162	33.58	12.171	50.402
s_1_1_NewScaffoldedContig_695	10074	3602	1720	1882	1798	386	420	954	1045.21	1377.26	898	74	27.763	11.678	44.858
s_1_1_NewScaffoldedContig_696	3689	1952	946	1006	558	172	543	657	458.427	452.603	1178	116	41.708	22.752	43.074
s_1_1_NewScaffoldedContig_697	7712	2392	1203	1189	1014	308	557	474	648.487	863.165	420	47	24.506	7.128	44.943
s_1_1_NewScaffoldedContig_698	799	652	340	312	154	24	268	200	334.312	28.205	210	123	55.512	29.394	59.199
s_1_1_NewScaffoldedContig_699	1077	627	300	327	132	36	234	218	333.242	26.099	268	83	38.839	19.754	58.403
s_1_1_NewScaffoldedContig_700	26166	6039	3044	2995	3562	862	334	1156	1197.43	1558.4	1391	49	18.995	9	39.009
s_1_1_NewScaffoldedContig_701	2108	472	241	231	184	82	77	124	353.522	149.592	96	33	18.591	7.54	42.6
s_1_1_NewScaffoldedContig_702	2001	819	492	327	262	68	134	339	359.099	186.161	180	60	30.215	12.052	48.876
s_1_1_NewScaffoldedContig_703	930	77	44	33	12	4	33	28	377	26.652	17	21	6.486	5.744	30.645
s_1_1_NewScaffoldedContig_704	6620	4100	1806	2294	258	194	2131	1498	334.884	31.647	3310	2490	49.41	247.166	16.616
s_1_1_NewScaffoldedContig_705	39558	5969	3066	2903	3292	1058	268	1208	1229.21	1639.24	1351	41	13.14	8.064	32.977
s_1_1_NewScaffoldedContig_706	651	570	348	222	60	40	206	262	328.6	23.128	208	197	45.584	39.662	58.525
s_1_1_NewScaffoldedContig_707	12531	3300	1629	1671	1728	546	232	736	986.877	1412.49	626	50	22.236	7.596	41.625
s_1_1_NewScaffoldedContig_708	10645	2771	1342	1429	1406	396	250	676	1194.69	1566.35	543	56	21.097	10.699	39.671
s_1_1_NewScaffoldedContig_709	53262	11164	5549	5615	6244	1652	761	2297	1352.07	1698.84	2197	76	17.062	10.694	34.39
s_1_1_NewScaffoldedContig_710	3713	620	309	311	270	108	103	126	426.896	394.903	117	34	14.485	6.029	35.874
s_1_1_NewScaffoldedContig_711	838	199	88	111	34	16	74	72	329.412	23.739	68	55	16.961	9.845	43.675
s_1_1_NewScaffoldedContig_712	7485	1847	926	921	936	276	258	351	851.261	1102.92	333	78	19.457	9.41	42.071
s_1_1_NewScaffoldedContig_713	28153	4096	2018	2078	2206	624	244	938	1175.34	1588.37	858	40	12.414	8.513	31.07
s_1_1_NewScaffoldedContig_714	17251	4817	2419	2398	2772	648	386	950	1323.18	1648.96	994	209	22.446	13.797	42.374
s_1_1_NewScaffoldedContig_715	16409	5873	2911	2962	3236	886	341	1337	1172.97	1466.32	1340	70	28.244	9.904	45.798
s_1_1_NewScaffoldedContig_716	4590	1389	690	699	600	204	317	240	551.443	620.669	333	51	24.856	8.591	45.229
s_1_1_NewScaffoldedContig_717	5101	1052	533	519	490	192	130	219	536.355	599.959	212	38	17.585	6.433	38.385
s_1_1_NewScaffoldedContig_718	1321	676	370	306	52	66	59	494	347.5	34.728	281	133	30.511	25.017	49.357
s_1_1_NewScaffoldedContig_719	33815	9839	4934	4905	5850	1424	387	2037	1366.66	1657.43	1857	57	23.532	9.478	42.298
s_1_1_NewScaffoldedContig_720	52707	7947	3958	3989	4608	1394	261	1522	1272.33	1643.39	1311	47	12.86	8.246	32.848
s_1_1_NewScaffoldedContig_721	31570	14204	7066	7138	8626	1488	750	3181	1570.21	1740.29	3067	74	32.39	16.388	46.715
s_1_1_NewScaffoldedContig_722	746	52	25	27	18	14	10	9	310.778	29.032	9	13	6.264	2.731	33.914
s_1_1_NewScaffoldedContig_723	7629	3016	1538	1478	1474	322	450	739	985.301	1273.42	765	221	29.883	18.076	47.686
s_1_1_NewScaffoldedContig_724	18955	3759	1902	1857	1934	656	293	814	1359.56	1694.11	769	108	16.139	9.086	38.069
s_1_1_NewScaffoldedContig_725	16940	8944	4424	4520	5140	940	571	2200	1556.24	1689.2	2184	130	36.76	12.66	54.693
s_1_1_NewScaffoldedContig_726	23132	4954	2490	2464	2922	762	185	962	1287.21	1647.57	1058	60	18.068	8.687	39.171
s_1_1_NewScaffoldedContig_727	2324	793	402	391	296	112	219	156	404.014	312.205	174	57	27.438	9.314	44.062
s_1_1_NewScaffoldedContig_728	2725	928	470	458	392	78	235	214	458.071	451.679	235	48	26.592	8.753	45.541
s_1_1_NewScaffoldedContig_729	3322	1578	843	735	630	168	410	353	551.803	557.489	334	67	35.496	9.503	49.97
s_1_1_NewScaffoldedContig_730	2734	822	450	372	256	84	274	193	490.492	470.848	209	65	22.432	15.585	35.479
s_1_1_NewScaffoldedContig_731	16778	1341	658	683	686	260	131	233	864.595	1222.48	268	28	7.155	5.465	26.195
s_1_1_NewScaffoldedContig_732	46516	10899	5440	5459	6066	1740	759	2123	1213.24	1600.95	2118	204	19.492	10.342	39.831
s_1_1_NewScaffoldedContig_733	3288	7652	3871	3781	878	626	2154	3905	331.995	29.889	5024	1140	147.472	217.342	28.315
s_1_1_NewScaffoldedContig_734	18422	17456	9405	8051	2784	854	5268	8394	1158.38	1542.38	12439	7184	70.029	462.731	41.396
s_1_1_NewScaffoldedContig_735	3360	108833	55486	53347	18454	7508	22597	59223	338.176	38.418	55902	9883	2346.31	2490.16	26.905
s_1_1_NewScaffoldedContig_736	1277	463	215	248	78	26	100	258	351.641	32.02	106	59	21.488	17.961	54.503
s_1_1_NewScaffoldedContig_737	50007	18765	9428	9337	11798	2470	571	3675	1475.82	1696.45	3261	95	29.037	9.172	47.211
s_1_1_NewScaffoldedContig_738	17946	4878	2472	2406	2186	474	603	1562	1012.5	1353.22	1129	73	19.599	17.58	32.436
s_1_1_NewScaffoldedContig_739	43921	9530	4742	4788	5938	1514	265	1607	1302.64	1662.8	2048	59	18.447	8.011	39.466
s_1_1_NewScaffoldedContig_740	11615	2013	1023	990	1056	398	170	345	1138.72	1579.52	353	40	14.624	7.287	35.721
s_1_1_NewScaffoldedContig_741	24801	4929	2473	2456	2790	772	340	929	1165.49	1532.62	995	54	16.861	8.183	38.164
s_1_1_NewScaffoldedContig_742	31332	6741	3370	3371	3976	944	368	1327	1284.2	1623.64	1303	77	17.941	10.363	38.925
s_1_1_NewScaffoldedContig_743	11262	2688	1394	1294	1330	368	289	652	1174.98	1581.66	637	61	19.296	10.527	37.151
s_1_1_NewScaffoldedContig_744	3386	515	313	202	96	82	150	178	336.417	24.797	218	98	11.328	13.604	26.964
s_1_1_NewScaffoldedContig_745	4276	1283	631	652	554	182	259	272	558.025	592.882	267	49	23.296	7.81	43.896
s_1_1_NewScaffoldedContig_746	8268	1320	688	632	576	264	200	258	910.715	1354.48	317	65	13.861	11.593	29.548
s_1_1_NewScaffoldedContig_747	1236	505	234	271	130	52	121	200	340.446	30.413	183	84	29.975	15.423	44.66
s_1_1_NewScaffoldedContig_748	13870	2508	1233	1275	1216	368	364	527	1034.24	1504.19	401	46	14.584	13	26.539
s_1_1_NewScaffoldedContig_749	16753	3747	1770	1977	2042	356	478	826	1305.73	1625.39	688	44	16.106	9.432	44.1
s_1_1_NewScaffoldedContig_750	9631	4177	2157	2020	2260	512	511	852	1197.63	1523.09	846	63	32.79	11.443	47.648
s_1_1_NewScaffoldedContig_751	2282	542	282	260	174	82	150	125	351.034	151.426	89	34	19.347	6.276	38.212
s_1_1_NewScaffoldedContig_752	26988	5522	2725	2797	2928	788	548	1159	1235.85	1596.16	1210	189	16.587	13.171	32.418
s_1_1_NewScaffoldedContig_753	31140	5229	2624	2605	2544	746	588	1251	1136.09	1557.99	1126	421	13.644	16.566	31.304
s_1_1_NewScaffoldedContig_754	9966	50369	23537	26832	6270	3038	17060	23449	371.361	229.708	37856	8257	367.52	850.487	21.874
s_1_1_NewScaffoldedContig_755	12852	2875	1438	1437	1630	460	243	503	1257.22	1645.68	497	43	18.804	8.054	38.477
s_1_1_NewScaffoldedContig_756	130027	38641	19485	19156	24340	4818	1182	7699	1491.46	1716.47	5840	69	23.34	10.999	42.718
s_1_1_NewScaffoldedContig_757	11868	3327	1678	1649	1938	506	267	570	1221.66	1612.89	573	53	22.81	8.766	42.366
s_1_1_NewScaffoldedContig_758	3236	1467	682	785	512	140	411	386	585.672	605.016	296	73	29.032	13.334	62.855
s_1_1_NewScaffoldedContig_759	18359	1716	848	868	832	308	192	334	858.418	1265.79	412	41	8.174	9.04	20.007
s_1_1_NewScaffoldedContig_760	4427	647	323	324	252	144	100	135	470.841	432.815	124	29	12.661	5.066	36.661
s_1_1_NewScaffoldedContig_761	13361	2740	1413	1327	1500	390	299	491	1105.47	1525.74	619	50	17.113	11.24	34.159
s_1_1_NewScaffoldedContig_762	19758	3603	1783	1820	1968	602	232	734	1183.19	1580.86	661	46	15.368	7.95	36.228
s_1_1_NewScaffoldedContig_763	16178	3057	1581	1476	1592	524	177	696	1107.81	1507.01	561	47	16.32	9.142	35.431
s_1_1_NewScaffoldedContig_764	8362	2615	1365	1250	1388	356	278	545	880.722	1257.95	607	60	25.528	11.592	45.204
s_1_1_NewScaffoldedContig_765	12476	5817	2833	2984	2992	534	552	1686	1424.83	1569.42	1422	87	31.972	18.048	48.581
s_1_1_NewScaffoldedContig_766	22430	4834	2447	2387	2852	732	296	883	1336.2	1647.34	857	49	17.149	10.12	38.404
s_1_1_NewScaffoldedContig_767	25620	6334	3227	3107	4072	796	307	1056	1341.97	1662.78	1601	56	20.245	8.688	43.599
s_1_1_NewScaffoldedContig_768	1194	650	337	313	168	22	223	225	330.131	27.123	182	63	35.037	12.521	62.73
s_1_1_NewScaffoldedContig_769	7409	1443	728	715	680	274	139	335	715.885	1066.05	212	43	16.498	8.002	38.278
s_1_1_NewScaffoldedContig_770	16107	2902	1424	1478	1498	462	295	600	1101.66	1506.34	564	75	14.956	10.946	31.707
s_1_1_NewScaffoldedContig_771	2302	938	453	485	316	100	299	208	361.899	213.653	248	64	29.081	9.754	52.215
s_1_1_NewScaffoldedContig_772	9653	2277	1125	1152	1136	278	326	503	804.806	1146.62	535	53	18.909	13.768	33.036
s_1_1_NewScaffoldedContig_773	2221	222	107	115	104	16	57	40	356.769	215.088	37	20	8.557	3.939	42.503
s_1_1_NewScaffoldedContig_774	3472	1161	612	549	390	104	337	311	338.672	101.333	260	61	25.212	14.777	45.219
s_1_1_NewScaffoldedContig_775	25576	4302	2197	2105	2448	754	227	802	1355.99	1718.9	627	38	14.278	8.193	33.903
s_1_1_NewScaffoldedContig_776	1456	500	236	264	170	46	142	134	331.976	28.694	129	48	25.683	9.079	50.962
s_1_1_NewScaffoldedContig_777	10617	4382	2156	2226	2590	458	348	935	1345.64	1578.09	1108	67	30.647	9.922	50.862
s_1_1_NewScaffoldedContig_778	671	74	25	49	10	24	12	25	345.8	14.33	10	19	10.301	4.577	36.811
s_1_1_NewScaffoldedContig_779	13657	6955	3508	3447	4250	704	331	1594	1480.11	1614.24	1490	75	36.536	12.427	52.647
s_1_1_NewScaffoldedContig_780	16430	1160	600	560	618	188	98	235	1128.88	1558.59	176	30	6.028	5.372	26.403
s_1_1_NewScaffoldedContig_781	5158	76	31	45	20	10	14	31	1225.9	1754.89	7	15	1.092	2.929	6.068
s_1_1_NewScaffoldedContig_782	752	8349	4076	4273	8	1374	253	6661	294	53.371	4919	1931	715.62	680.86	32.314
s_1_1_NewScaffoldedContig_783	1378	484	252	232	74	44	158	200	328.027	22.303	113	42	20.107	8.067	68.795
s_1_1_NewScaffoldedContig_784	1903	1267	596	671	394	80	277	498	356.569	188.283	239	72	41.961	11.594	65.581
s_1_1_NewScaffoldedContig_785	49095	13192	6467	6725	7686	1674	830	2821	1335.84	1657.35	3717	754	21.262	25.079	39.456
s_1_1_NewScaffoldedContig_786	9220	903	441	462	336	176	111	264	682.274	1056.43	196	29	7.564	7.096	30.683
s_1_1_NewScaffoldedContig_787	2007	479	249	230	142	80	132	120	329.268	29.373	88	45	18.722	7.207	45.441
s_1_1_NewScaffoldedContig_788	34907	3909	1940	1969	1836	802	286	888	994.441	1395.36	717	67	9.671	7.501	28.149
s_1_1_NewScaffoldedContig_789	5472	1817	886	931	710	146	327	603	857.955	1064.86	422	58	21.993	14.98	47.752
s_1_1_NewScaffoldedContig_790	18984	4646	2322	2324	2694	676	269	928	1281.89	1615.91	810	51	19.934	7.569	41.251
s_1_1_NewScaffoldedContig_791	601	254	101	153	22	12	114	104	323.455	32.828	47	50	26.328	11.474	53.245
s_1_1_NewScaffoldedContig_792	14845	4760	2351	2409	2704	482	387	1118	1306.58	1563.43	867	62	23.868	15.427	39.805
s_1_1_NewScaffoldedContig_793	3280	844	419	425	268	86	191	286	462.448	442.969	197	54	16.154	14.39	50.64
s_1_1_NewScaffoldedContig_794	5771	1383	737	646	532	224	223	379	700.38	977.355	293	50	19.595	9.011	39.3
s_1_1_NewScaffoldedContig_795	30134	6453	3203	3250	3678	1142	353	1148	1232.54	1617.68	1242	208	18.305	12.421	38.471
s_1_1_NewScaffoldedContig_796	127380	32192	15973	16219	19944	4610	1145	5949	1429.81	1707.66	5676	65	20.494	10.626	40.127
s_1_1_NewScaffoldedContig_797	11189	2203	1086	1117	1282	396	118	358	990.348	1405.23	384	41	17.366	6.766	37.823
s_1_1_NewScaffoldedContig_798	7288	1253	640	613	576	192	149	310	1007.38	1398.41	316	50	14.136	10.302	33.96
s_1_1_NewScaffoldedContig_799	6689	3541	1770	1771	1622	330	576	978	1015.96	1244.7	843	80	36.932	10.623	56.944
s_1_1_NewScaffoldedContig_800	12496	1070	544	526	504	186	121	242	900.56	1338.33	173	32	7.208	6.146	28.009
s_1_1_NewScaffoldedContig_801	11456	5160	2583	2577	2824	558	324	1388	1303.19	1542.1	1094	62	32.536	10.062	52.566
s_1_1_NewScaffoldedContig_802	32246	10417	5298	5119	5684	1352	1035	2209	1443.33	1660.92	2511	1063	25.504	47.105	44.331
s_1_1_NewScaffoldedContig_803	10983	2362	1155	1207	1004	256	438	620	901.934	1209.2	519	70	16.464	14.711	29.619
s_1_1_NewScaffoldedContig_804	4414	675	347	328	232	136	112	175	453.216	450.528	169	31	13.141	6.942	36.951
s_1_1_NewScaffoldedContig_805	10199	2018	984	1034	764	220	527	479	900.16	1346.31	572	165	15.223	16.686	26.405
s_1_1_NewScaffoldedContig_806	7808	1476	761	715	584	162	362	347	806.034	1148.49	369	115	14.44	16.323	23.297
s_1_1_NewScaffoldedContig_807	24924	4605	2306	2299	2642	684	249	942	1207.78	1583.03	903	46	15.58	9.084	34.922
s_1_1_NewScaffoldedContig_808	15185	5157	2426	2731	2276	584	894	1317	1136.84	1524.65	1257	803	26.21	43.249	42.634
s_1_1_NewScaffoldedContig_809	16363	3257	1545	1712	1658	462	276	786	1020.44	1435.68	642	69	16.799	10.401	35.935
s_1_1_NewScaffoldedContig_810	11838	1846	913	933	872	248	318	375	537.372	692.248	308	45	12.967	11.482	26.947
s_1_1_NewScaffoldedContig_811	4376	935	454	481	316	118	263	225	477.81	498.292	355	217	17.832	23.391	37.637
s_1_1_NewScaffoldedContig_812	6149	2193	1113	1080	1008	232	423	494	801.393	1052.46	662	77	27.189	10.045	49
s_1_1_NewScaffoldedContig_813	1957	636	316	320	208	52	218	144	335.644	25.468	116	47	24.757	7.429	44.405
s_1_1_NewScaffoldedContig_814	15795	3392	1681	1711	1916	566	166	686	1221.76	1620.73	581	57	17.926	9.904	36.853
s_1_1_NewScaffoldedContig_815	13006	2280	1176	1104	1140	378	252	461	1051.75	1403.21	362	45	14.599	9.73	33.085
s_1_1_NewScaffoldedContig_816	28649	6680	3359	3321	3300	992	738	1534	1245.46	1612.2	1733	346	19.469	23.981	37.02
s_1_1_NewScaffoldedContig_817	24112	6611	3337	3274	3126	782	1089	1515	1177.01	1499.89	1955	831	21.851	43.273	32.573
s_1_1_NewScaffoldedContig_818	59280	11638	5781	5857	6774	2000	367	2273	1255.72	1653.98	1868	57	16.755	8.85	37.276
s_1_1_NewScaffoldedContig_819	3437	1539	804	735	586	168	373	401	569.276	574.035	351	62	31.081	10.322	56.299
s_1_1_NewScaffoldedContig_820	152021	53542	26503	27039	34296	6904	1335	10316	1542.38	1731.53	8243	331	27.16	11.943	46.248
s_1_1_NewScaffoldedContig_821	2571	448	229	219	148	100	74	111	428.608	414.766	77	38	15.833	7.232	36.523
s_1_1_NewScaffoldedContig_822	2692	704	401	303	218	124	158	198	363.991	222.559	152	45	19.713	7.88	42.051
s_1_1_NewScaffoldedContig_823	19312	5965	2986	2979	3020	676	461	1740	1183.64	1522.44	1086	71	23.176	16.059	36.387
s_1_1_NewScaffoldedContig_824	18374	5940	3011	2929	3518	640	508	1193	1439.73	1715.12	1309	88	25.16	11.047	45.869
s_1_1_NewScaffoldedContig_825	1096	357	200	157	84	16	142	110	340.214	31.77	74	42	23.267	7.037	47.172
s_1_1_NewScaffoldedContig_826	26862	8871	4391	4480	5434	1130	459	1731	1492.78	1717.93	1972	61	25.432	8.878	46.329
s_1_1_NewScaffoldedContig_827	13920	2472	1239	1233	1290	504	175	449	1157.05	1553.16	526	36	15.269	7.238	35.151
s_1_1_NewScaffoldedContig_828	39729	12086	6055	6031	7340	1532	582	2457	1411	1662.92	2456	89	23.497	12.411	43.125
s_1_1_NewScaffoldedContig_829	35728	9579	4741	4838	5338	1300	635	2142	1362.2	1685.23	1950	78	21.364	12.922	38.079
s_1_1_NewScaffoldedContig_830	18240	3893	1903	1990	2180	524	321	799	1053.42	1424.38	885	57	17.461	13.583	32.862
s_1_1_NewScaffoldedContig_831	52342	11384	5768	5616	6830	1586	464	2314	1383.55	1682.97	2265	51	17.667	10.799	35.161
s_1_1_NewScaffoldedContig_832	27953	4917	2436	2481	2384	696	579	1172	1050.36	1471.21	1109	59	14.466	12.894	27.442
s_1_1_NewScaffoldedContig_833	1061	149	61	88	42	16	35	51	326.19	21.253	24	23	11.18	4.511	35.815
s_1_1_NewScaffoldedContig_834	1877	2825	1399	1426	142	62	1349	1249	330.07	26.183	2306	1042	108.881	165.176	47.789
s_1_1_NewScaffoldedContig_835	38672	8782	4451	4331	5382	1362	300	1594	1190.21	1577.47	1836	45	19.105	9.099	39.002
s_1_1_NewScaffoldedContig_836	49082	9915	4975	4940	5904	1714	333	1781	1254.68	1602.18	1722	70	17.08	8.29	38.76
s_1_1_NewScaffoldedContig_837	14258	2733	1346	1387	1444	474	140	617	1189.37	1567.36	432	39	16.184	7.327	38.07
s_1_1_NewScaffoldedContig_838	2732	757	399	358	238	98	174	244	471.95	435.691	172	50	21.518	11.345	41.874
s_1_1_NewScaffoldedContig_839	13948	3414	1738	1676	1758	512	313	779	1037.58	1397.4	638	77	19.697	10.526	38.507
s_1_1_NewScaffoldedContig_840	60708	9671	4840	4831	4780	1700	810	2191	1279.93	1666.79	2092	238	13.263	13.252	30.772
s_1_1_NewScaffoldedContig_841	13794	4007	1948	2059	362	170	1798	1642	984.359	1474.19	2555	1922	17.768	109.132	22.706
s_1_1_NewScaffoldedContig_842	874	162	70	92	46	28	41	44	331.87	23.615	22	31	16.628	6.75	36.728
s_1_1_NewScaffoldedContig_843	19303	4401	2205	2196	2198	600	447	1083	1311.7	1681.78	1199	298	18.492	21.031	37.165
s_1_1_NewScaffoldedContig_844	12686	1572	800	772	852	230	172	289	1072.72	1509.45	321	67	10.594	9.256	25.335
s_1_1_NewScaffoldedContig_845	10067	2313	1170	1143	1202	328	228	519	1069.02	1433.92	350	56	18.704	10.458	37.151
s_1_1_NewScaffoldedContig_846	15546	2406	1192	1214	1352	390	176	440	1032.1	1511.31	389	40	13.436	9.062	30.233
s_1_1_NewScaffoldedContig_847	104949	24085	12009	12076	15088	3558	570	4458	1370.69	1681.99	3984	64	18.99	9.381	40.059
s_1_1_NewScaffoldedContig_848	2598	2601	1260	1341	868	432	582	664	389.714	282.252	824	123	80.781	20.958	39.338
s_1_1_NewScaffoldedContig_849	977	1058	547	511	168	150	334	379	330.548	29.062	261	164	83.723	40.363	41.453
s_1_1_NewScaffoldedContig_850	13893	1011	503	508	470	168	122	231	1103.13	1562.24	204	62	6.01	5.913	28.46
s_1_1_NewScaffoldedContig_851	23354	7304	3652	3652	3708	974	804	1734	1243.82	1548.9	2118	815	24.612	36.9	42.434
s_1_1_NewScaffoldedContig_852	699	145	67	78	12	18	69	46	318.167	18.73	77	93	12.718	20.588	34.049
s_1_1_NewScaffoldedContig_853	43497	8424	4310	4114	3694	1188	1389	2016	1293.64	1717.86	2563	734	15.652	35.117	31.278
s_1_1_NewScaffoldedContig_854	50230	9682	4788	4894	5372	1520	562	2061	1319.11	1669.63	2009	200	15.606	10.89	34.796
s_1_1_NewScaffoldedContig_855	28537	5510	2749	2761	3012	990	361	1041	1249.34	1638.49	796	47	16.014	9.885	34.492
s_1_1_NewScaffoldedContig_856	16323	5320	2643	2677	2504	612	731	1416	1231.38	1625.32	948	78	23.856	17.407	38.755
s_1_1_NewScaffoldedContig_857	17094	7061	3538	3523	4200	688	622	1463	1355.4	1611.34	1552	108	29.941	16.328	44.273
s_1_1_NewScaffoldedContig_858	58616	19993	9951	10042	11902	2280	854	4687	1452.77	1657.67	4009	218	25.539	14.401	43.855
s_1_1_NewScaffoldedContig_859	7023	60419	29851	30568	15418	5964	12066	26239	339.604	110.226	34728	2987	626.014	903.023	30.898
s_1_1_NewScaffoldedContig_860	1293	28065	13654	14411	6712	2394	6319	12338	343.872	36.201	20717	2453	1640.33	605.663	44.47
s_1_1_NewScaffoldedContig_861	18559	6903	3398	3505	3736	738	555	1782	1442.56	1665.2	1302	63	26.124	15.043	47.012
s_1_1_NewScaffoldedContig_862	19082	5816	2857	2959	3490	788	300	1144	1405.98	1718.36	856	57	24.555	9.478	43.958
s_1_1_NewScaffoldedContig_863	981	134	71	63	20	18	42	51	350.8	42.722	24	20	10.241	5.453	32.212
s_1_1_NewScaffoldedContig_864	3493	887	417	470	352	112	213	197	511.148	511.191	156	45	20.374	9.707	41.225
s_1_1_NewScaffoldedContig_865	21305	3250	1597	1653	1590	550	324	727	960.792	1442.08	620	43	12.934	9.221	31.791
s_1_1_NewScaffoldedContig_866	34765	5470	2774	2696	2696	910	524	1239	1214.85	1606.07	1171	129	12.938	10.757	31.094
s_1_1_NewScaffoldedContig_867	86399	12004	5988	6016	6240	2152	854	2495	1204.92	1614.27	2320	206	11.843	9.537	30.903
s_1_1_NewScaffoldedContig_868	54939	12188	6079	6109	7550	1948	314	2156	1448.79	1750.75	1898	52	18.435	8.71	39.416
s_1_1_NewScaffoldedContig_869	93239	29264	14746	14518	18302	3784	1110	5642	1447.43	1712.36	6411	67	24.818	11.85	42.765
s_1_1_NewScaffoldedContig_870	34198	10908	5502	5406	6780	1392	430	2124	1405.77	1662.63	2162	75	24.598	9.649	45.792
s_1_1_NewScaffoldedContig_871	14081	3057	1491	1566	1510	412	434	641	1069.21	1495.73	812	216	17.866	16.642	32.334
s_1_1_NewScaffoldedContig_872	8506	2281	1119	1162	1312	312	218	398	1067.27	1446.07	382	49	21.807	8.412	42.57
s_1_1_NewScaffoldedContig_873	4436	1402	679	723	520	186	320	361	449.519	446.243	497	73	24.977	14.949	43.711
s_1_1_NewScaffoldedContig_874	729	345	131	214	42	8	90	205	330.667	30.165	83	61	27.55	12.811	60.768
s_1_1_NewScaffoldedContig_875	893	504	232	272	86	30	101	283	329.488	26.943	107	65	32.963	12.726	65.51
s_1_1_NewScaffoldedContig_876	24793	5672	2831	2841	3110	874	369	1220	1127.59	1513.17	1309	56	18.985	10.33	36.587
s_1_1_NewScaffoldedContig_877	3226	665	301	364	218	70	138	229	433.303	392.125	136	46	15.912	11.45	33.075
s_1_1_NewScaffoldedContig_878	9034	1279	623	656	598	242	145	258	1055.64	1461.58	165	38	12.432	6.491	33.861
s_1_1_NewScaffoldedContig_879	17903	2259	1144	1115	1210	444	147	406	1182.27	1614.22	324	35	10.942	7.801	29.179
s_1_1_NewScaffoldedContig_880	60800	8286	4266	4020	4136	1564	581	1826	1088.78	1532.57	1676	149	11.681	8.746	29.949
s_1_1_NewScaffoldedContig_881	2158	799	372	427	12	74	319	389	378.667	24.424	332	187	25.893	48.083	12.002
s_1_1_NewScaffoldedContig_882	52214	8759	4350	4409	5064	1260	392	1892	1315.66	1649.28	1700	49	13.671	10.332	31.951
s_1_1_NewScaffoldedContig_883	1761	232	110	122	128	20	32	50	331.219	26.015	34	25	11.089	4.766	50.767
s_1_1_NewScaffoldedContig_884	483	51	26	25	6	0	24	21	325.333	28.288	13	17	7.217	4.534	37.267
s_1_1_NewScaffoldedContig_885	6464	1553	744	809	764	212	184	365	849.715	1265.93	369	49	19.878	8.295	40.764
s_1_1_NewScaffoldedContig_886	10257	2463	1242	1221	1204	418	235	564	1290.89	1637.33	535	45	19.902	8.397	38.891
s_1_1_NewScaffoldedContig_887	598	3929	1854	2075	708	120	1623	1443	329.788	28.828	978	587	454.957	106.047	60.033
s_1_1_NewScaffoldedContig_888	598	4296	1982	2314	778	200	1731	1543	332.9	27.387	1001	702	509.048	150.382	60.033
s_1_1_NewScaffoldedContig_889	2214	757	410	347	240	108	231	168	341.35	126.946	100	58	25.865	8.172	46.296
s_1_1_NewScaffoldedContig_890	23386	6280	3154	3126	3764	760	497	1178	1350.12	1663.85	891	56	21.174	11.927	39.28
s_1_1_NewScaffoldedContig_891	2448	443	218	225	150	106	96	88	333.573	28.177	87	33	14.991	5.351	37.5
s_1_1_NewScaffoldedContig_892	20090	2805	1431	1374	1364	440	372	571	914.629	1351.91	620	39	11.796	9.747	27.093
s_1_1_NewScaffoldedContig_893	11431	2584	1307	1277	1298	324	224	691	1166.3	1548.63	681	47	18.406	11.197	36.707
s_1_1_NewScaffoldedContig_894	4553	643	326	317	262	140	113	118	561.015	705.09	153	34	11.96	5.545	36.745
s_1_1_NewScaffoldedContig_895	34651	21711	10911	10800	13402	1982	1096	4999	1751.7	1738.74	4668	133	40.792	15.984	58.948
s_1_1_NewScaffoldedContig_896	20785	4740	2344	2396	2882	690	295	802	1334.37	1659.38	729	52	18.924	8.408	40.366
s_1_1_NewScaffoldedContig_897	1875	911	458	453	226	114	295	265	328.283	27.793	197	66	33.682	10.098	57.547
s_1_1_NewScaffoldedContig_898	10067	1315	673	642	626	268	94	297	959.144	1350.69	301	35	11.429	7.666	30.009
s_1_1_NewScaffoldedContig_899	16832	5054	2507	2547	2696	670	558	1041	993.099	1329.86	997	58	24.294	9.84	43.554
s_1_1_NewScaffoldedContig_900	8183	3360	1678	1682	1782	444	413	665	1161.56	1421.3	845	64	31.401	10.803	48.98
s_1_1_NewScaffoldedContig_901	23637	5403	2698	2705	2944	842	528	973	1052.54	1482.59	1146	49	19.433	8.031	39.227
s_1_1_NewScaffoldedContig_902	64261	24296	12217	12079	15430	2826	753	5002	1555.88	1735.36	5527	74	28.659	12.302	45.754
s_1_1_NewScaffoldedContig_903	673	8420	4558	3862	1956	652	2531	3202	331.756	27.96	3326	1292	907.502	289.769	53.492
s_1_1_NewScaffoldedContig_904	544	66	46	20	8	14	13	26	310.25	26.696	9	29	11.517	7.255	30.331
s_1_1_NewScaffoldedContig_905	24670	3546	1785	1761	1814	596	265	782	1162.21	1534.1	899	46	12.352	9.138	30.336
s_1_1_NewScaffoldedContig_906	5892	1532	783	749	756	214	203	335	899.889	1294.1	275	44	21.046	7.798	43.483
s_1_1_NewScaffoldedContig_907	2331	562	270	292	186	74	150	138	388.763	276.393	122	48	19.903	8.081	42.085
s_1_1_NewScaffoldedContig_908	29212	14535	7196	7339	9158	1436	608	3194	1529.93	1684.82	2891	90	35.928	11.773	50.818
s_1_1_NewScaffoldedContig_909	15032	1048	532	516	442	174	146	261	771.181	1257.7	198	31	6.201	7.505	17.869
s_1_1_NewScaffoldedContig_910	31170	9886	4991	4895	5572	1514	377	2262	1285	1600.79	1928	63	25.038	11.819	43.397
s_1_1_NewScaffoldedContig_911	58788	10675	5361	5314	5872	1838	373	2397	1266.59	1624.79	1763	52	15.156	9.356	35.213
s_1_1_NewScaffoldedContig_912	1770	170	81	89	74	14	27	51	338.676	29.61	34	22	8.321	4.18	39.322
s_1_1_NewScaffoldedContig_913	43133	7966	3941	4025	3972	1098	671	2112	1371.46	1714.47	1660	134	14.861	12.602	30.554
s_1_1_NewScaffoldedContig_914	55189	14150	7066	7084	8668	2068	545	2629	1445.71	1742.57	2525	59	20.704	9.68	41.043
s_1_1_NewScaffoldedContig_915	2491	61155	31238	29917	10854	5866	16322	27467	333.342	29.098	30908	6181	1818.29	2215.7	22.24
s_1_1_NewScaffoldedContig_916	50349	16616	8276	8340	10626	2180	558	3036	1516.78	1743.4	2882	65	26.005	10.272	44.124
s_1_1_NewScaffoldedContig_917	15243	4057	2065	1992	1732	440	582	1245	983.716	1372.92	933	60	20.008	15.838	33.917
s_1_1_NewScaffoldedContig_918	13977	6773	3443	3330	3506	654	914	1614	1385.34	1604.86	2014	711	36.721	49.431	51.034
s_1_1_NewScaffoldedContig_919	18798	5407	2678	2729	3126	654	226	1333	1421.37	1649.58	1081	58	21.79	11.902	42.191
s_1_1_NewScaffoldedContig_920	34677	9347	4674	4673	5540	1208	466	2009	1322.97	1631.69	1991	58	21.337	10.05	40.747
s_1_1_NewScaffoldedContig_921	24459	8450	4296	4154	5298	1088	408	1550	1396.24	1640.71	1737	64	26.958	9.016	46.723
s_1_1_NewScaffoldedContig_922	89053	25000	12467	12533	15634	3552	893	4529	1459.98	1728.99	4966	73	22.511	11.679	40.863
s_1_1_NewScaffoldedContig_923	1058	44968	21772	23196	5550	2546	13866	22745	343.515	34.356	33675	6921	3059.06	1915.13	49.622
s_1_1_NewScaffoldedContig_924	2214	752	405	347	284	50	168	237	365.676	233.287	196	49	27.338	8.207	46.658
s_1_1_NewScaffoldedContig_925	18868	5699	2896	2803	3360	660	344	1254	1316.22	1688.88	981	56	24.002	10.457	42.84
s_1_1_NewScaffoldedContig_926	28698	10796	5457	5339	6550	1168	598	2357	1466.95	1651.25	2035	69	27.813	12.044	49.129
s_1_1_NewScaffoldedContig_927	9705	10321	5092	5229	5794	1114	659	2643	1386.91	1546.12	2557	138	72.997	23.513	57.795
s_1_1_NewScaffoldedContig_928	3874	1808	896	912	764	164	352	507	657.223	687.719	361	59	34.289	9.532	51.6
s_1_1_NewScaffoldedContig_929	3275	1873	943	930	532	86	343	893	752.947	713.086	556	89	34.439	20.651	57.496
s_1_1_NewScaffoldedContig_930	2415	176	93	83	66	20	24	63	477.061	470.409	29	12	5.417	2.258	53.83
s_1_1_NewScaffoldedContig_931	5007	2378	1083	1295	1028	246	409	660	751.372	908.765	573	66	34.714	10.145	52.506
s_1_1_NewScaffoldedContig_932	61580	14906	7552	7354	9178	2284	443	2755	1390.88	1705.38	3176	58	19.871	8.669	40.966
s_1_1_NewScaffoldedContig_933	24868	10797	5311	5486	6080	1052	854	2667	1417.33	1642.52	1799	77	31.778	16.566	43.856
s_1_1_NewScaffoldedContig_934	7000	3205	1674	1531	1712	342	415	672	1010.84	1303.02	671	83	35.407	11.884	50
s_1_1_NewScaffoldedContig_935	2093	550	289	261	176	74	138	148	347.625	137.139	126	41	20.78	8.749	49.546
s_1_1_NewScaffoldedContig_936	22554	3881	1906	1975	1976	650	334	846	1086.25	1469.83	714	48	14.497	7.855	36.517
s_1_1_NewScaffoldedContig_937	34219	8411	4120	4291	4546	1174	744	1826	1260.83	1624.36	2052	57	19.412	11.671	36.898
s_1_1_NewScaffoldedContig_938	10502	4525	2270	2255	2508	506	468	986	1230.17	1564.47	915	68	32.427	8.93	49.714
s_1_1_NewScaffoldedContig_939	9782	3444	1769	1675	1894	476	364	655	1191.48	1425.39	680	65	26.741	9.555	46.749
s_1_1_NewScaffoldedContig_940	9871	1790	864	926	874	290	199	388	951.108	1283.11	279	46	15.021	6.727	36.481
s_1_1_NewScaffoldedContig_941	21618	4751	2336	2415	2078	688	626	1284	1170.1	1576.53	1554	640	18.049	33.696	32.057
s_1_1_NewScaffoldedContig_942	24068	5000	2448	2552	2940	710	304	964	1343.73	1709.81	887	46	17.058	11.246	33.455
s_1_1_NewScaffoldedContig_943	3526	12944	6409	6535	3782	3296	607	5104	508.992	441.646	3104	500	280.827	111.549	44.668
s_1_1_NewScaffoldedContig_944	29199	4201	2091	2110	2024	686	381	1025	1213.76	1587.51	736	73	12.019	9.545	29.35
s_1_1_NewScaffoldedContig_945	12323	2424	1231	1193	990	366	388	640	769.947	1164.9	547	99	15.982	9.233	35.259
s_1_1_NewScaffoldedContig_946	11841	4495	2282	2213	2684	452	255	1040	1513.42	1626.58	813	65	27.526	11.407	50.992
s_1_1_NewScaffoldedContig_947	49898	17793	8924	8869	11460	2326	387	3387	1491.76	1698.64	3970	75	27.582	11.072	45.829
s_1_1_NewScaffoldedContig_948	59019	19286	9690	9596	12358	2630	522	3459	1484.15	1706.25	3840	59	26.007	8.879	45.141
s_1_1_NewScaffoldedContig_949	1336	615	377	238	140	44	101	319	332.929	26.506	163	51	27.105	10.961	68.413
s_1_1_NewScaffoldedContig_950	8153	1339	701	638	650	226	118	323	945.554	1357.64	199	34	13.762	7.272	34.638
s_1_1_NewScaffoldedContig_951	42018	11259	5775	5484	7106	1704	394	1852	1317.43	1625.5	2211	71	22.092	9.428	42.239
s_1_1_NewScaffoldedContig_952	556	286	158	128	26	8	113	138	317.846	36.219	177	79	34.527	18.9	43.885
s_1_1_NewScaffoldedContig_953	4937	1753	885	868	732	226	392	381	703.445	890.755	589	162	27.187	13.52	45.372
s_1_1_NewScaffoldedContig_954	5256	1989	987	1002	856	280	377	455	689.306	894.956	469	68	29.063	8.556	48.002
s_1_1_NewScaffoldedContig_955	16102	3624	1795	1829	2150	574	216	616	1184.51	1569.51	727	50	19.141	7.878	39.666
s_1_1_NewScaffoldedContig_956	65405	12384	6173	6211	7510	2100	460	2097	1271.36	1629.31	2437	58	16.051	8.454	36.555
s_1_1_NewScaffoldedContig_957	3955	671	303	368	266	110	144	131	457	430.147	97	41	14.611	6.508	37.067
s_1_1_NewScaffoldedContig_958	5572	2060	1013	1047	742	150	470	664	722.757	854.796	663	214	26.537	21.047	42.265
s_1_1_NewScaffoldedContig_959	2400	776	386	390	252	142	179	196	331.635	28.523	163	45	25.272	7.533	43.5
s_1_1_NewScaffoldedContig_960	16512	2259	1126	1133	1174	482	120	428	1096.44	1437.58	400	49	11.739	7.667	31.856
s_1_1_NewScaffoldedContig_961	7950	2252	1112	1140	1032	430	186	571	1089.37	1630.46	383	60	22.46	10.243	42.855
s_1_1_NewScaffoldedContig_962	4842	1894	936	958	786	188	309	583	761.598	812.129	612	108	28.271	13.161	49.69
s_1_1_NewScaffoldedContig_963	2405	15203	7555	7648	1974	1636	4777	6687	360.947	158.96	10187	1303	405.838	304.827	53.555
s_1_1_NewScaffoldedContig_964	17379	2902	1489	1413	1350	460	472	561	882.061	1319.57	617	121	13.862	9.855	32.217
s_1_1_NewScaffoldedContig_965	19079	3863	1940	1923	1776	686	541	784	938.498	1349.63	778	48	16.995	8.042	35.788
s_1_1_NewScaffoldedContig_966	52039	11125	5600	5525	6836	1812	271	2011	1380.11	1705.39	2250	51	17.863	7.384	39.58
s_1_1_NewScaffoldedContig_967	5640	2053	998	1055	766	208	460	600	788.191	1160.25	581	135	26.846	17.484	41.188
s_1_1_NewScaffoldedContig_968	2011	757	363	394	262	82	189	216	346.771	126.444	189	51	29.48	9.153	47.539
s_1_1_NewScaffoldedContig_969	6146	1093	564	529	520	188	173	189	957.104	1237.01	238	44	14.808	7.167	36.837
s_1_1_NewScaffoldedContig_970	27611	4981	2467	2514	2868	766	369	870	1247.6	1643.27	1175	56	15.267	8.393	35.935
s_1_1_NewScaffoldedContig_971	7080	1089	484	605	244	148	189	500	585.721	943.371	485	61	11.391	14.972	21.102
s_1_1_NewScaffoldedContig_972	24111	4035	2059	1976	2120	768	211	860	1127.28	1506.14	713	42	14.273	7.152	35.204
s_1_1_NewScaffoldedContig_973	8880	852	448	404	356	116	137	211	675.725	1131.95	175	34	8.243	9.442	19.64
s_1_1_NewScaffoldedContig_974	3549	2244	1033	1211	868	180	574	597	595.327	601.24	520	85	44.351	11.015	54.269
s_1_1_NewScaffoldedContig_975	835	2415	1203	1212	466	220	918	787	335.335	28.235	865	370	220.126	71.973	40.599
s_1_1_NewScaffoldedContig_976	7287	3385	1715	1670	1526	288	607	915	1009.32	1239.83	706	95	32.352	17.455	47.55
s_1_1_NewScaffoldedContig_977	1073	21095	10707	10388	1126	866	8850	10093	336.094	29.594	10219	8355	1386.3	2223.36	38.863
s_1_1_NewScaffoldedContig_978	33407	5763	2918	2845	3326	954	386	1012	1201.25	1582.97	957	47	14.31	8.742	35.22
s_1_1_NewScaffoldedContig_979	4221	961	493	468	442	92	165	243	681.452	650.308	129	52	17.222	10.866	48.496
s_1_1_NewScaffoldedContig_980	12596	1699	819	880	772	302	182	399	924.407	1394.4	297	46	11.56	9.016	30.073
s_1_1_NewScaffoldedContig_981	4584	633	294	339	244	130	112	122	471.836	489.843	144	35	12.526	6.319	34.969
s_1_1_NewScaffoldedContig_982	9929	5570	3114	2456	510	296	2688	2010	528.055	826.845	4259	3504	46.599	305.675	25.672
s_1_1_NewScaffoldedContig_983	772	180	87	93	12	8	89	69	345.333	23.142	81	67	15.82	13.308	45.466
s_1_1_NewScaffoldedContig_984	3751	986	483	503	372	104	247	256	497.602	546.937	293	235	20.25	23.053	39.27
s_1_1_NewScaffoldedContig_985	26678	3565	1751	1814	1782	654	320	706	1124.55	1584.81	685	132	11.692	10.329	29.185
s_1_1_NewScaffoldedContig_986	13659	2254	1125	1129	1066	522	201	406	691.092	1061.77	377	39	14.635	7.092	36.057
s_1_1_NewScaffoldedContig_987	3758	1122	553	569	464	158	236	249	489.547	497.434	217	49	23.862	8.059	43.933
s_1_1_NewScaffoldedContig_988	15682	4014	2010	2004	2444	616	198	688	1109.1	1462.29	749	54	21.387	7.81	42.731
s_1_1_NewScaffoldedContig_989	19665	3155	1616	1539	1480	508	377	718	1085.73	1520.67	781	124	13.521	10.429	30.277
s_1_1_NewScaffoldedContig_990	17191	6888	3506	3382	4130	720	527	1451	1491.97	1689.25	1344	76	29.182	12.732	49.549
s_1_1_NewScaffoldedContig_991	2108	1208	668	540	206	86	390	517	333.874	29.682	361	131	35.098	18.001	61.575
s_1_1_NewScaffoldedContig_992	620	321	175	146	0	24	90	203			252	112	30.171	34.415	37.097
s_1_1_NewScaffoldedContig_993	17082	4330	2237	2093	2604	682	167	797	1189	1551.92	751	54	21.174	8.642	41.956
s_1_1_NewScaffoldedContig_994	6075	3251	1569	1682	1674	330	411	795	1066.05	1251.2	647	65	38.682	11.457	56.165
s_1_1_NewScaffoldedContig_995	64275	13557	6780	6777	8348	2236	345	2371	1411.77	1739.86	2551	48	17.778	8.474	38.611
s_1_1_NewScaffoldedContig_996	3204	3516	2019	1497	1132	956	216	1183	447.687	423.039	673	193	76.44	55.132	47.784
s_1_1_NewScaffoldedContig_997	52158	9939	4922	5017	5862	1544	487	1858	1301.7	1654.95	1882	78	15.959	9.515	35.015
s_1_1_NewScaffoldedContig_998	20151	10343	5368	4975	5500	816	960	2946	1409.05	1538.75	2096	96	33.629	21.238	49.417
s_1_1_NewScaffoldedContig_999	18998	5221	2651	2570	2474	580	617	1478	1503.57	1791.43	1042	73	20.487	16.591	32.619
s_1_1_NewScaffoldedContig_1000	8549	5629	2723	2906	2724	544	685	1632	1391.97	1529.66	973	104	42.38	14.267	59.82
s_1_1_NewScaffoldedContig_1001	12399	5414	2729	2685	3032	638	603	1075	1366.19	1642.74	1185	65	32.81	9.586	49.681
s_1_1_NewScaffoldedContig_1002	16425	5727	2859	2868	3374	656	452	1175	1395.33	1686.99	1102	62	26.788	11.803	43.848
s_1_1_NewScaffoldedContig_1003	22594	2415	1234	1181	1180	464	221	495	1083.95	1517.93	475	34	9.134	7.668	25.896
s_1_1_NewScaffoldedContig_1004	4490	2116	1054	1062	920	176	330	660	703.361	700.231	579	69	32.747	16.615	50.401
s_1_1_NewScaffoldedContig_1005	18338	3813	1894	1919	1922	642	420	751	1063.78	1477.75	1036	271	17.696	15.453	35.811
s_1_1_NewScaffoldedContig_1006	40985	6374	3280	3094	2360	882	1179	1816	1010.33	1485.3	2164	902	13.133	41.173	25.963
s_1_1_NewScaffoldedContig_1007	30407	5129	2544	2585	2654	904	478	994	1063.82	1482.93	860	98	14.442	9.593	31.999
s_1_1_NewScaffoldedContig_1008	845	5851	2704	3147	420	64	1970	3352	392.267	30.517	4719	2540	411.589	558.858	42.604
s_1_1_NewScaffoldedContig_1009	3299	1977	1001	976	532	178	344	901	591.62	599.882	482	94	37.57	14.25	61.746
s_1_1_NewScaffoldedContig_1010	13242	1910	942	968	910	358	168	426	837.196	1257.26	502	36	12.549	7.791	31.34
s_1_1_NewScaffoldedContig_1011	96437	21983	10876	11107	10418	2870	2920	5413	1344.99	1692.52	7092	2585	19.015	75.247	33.705
s_1_1_NewScaffoldedContig_1012	3377	1772	935	837	754	174	290	532	709.947	722.481	394	72	37.314	10.596	52.443
s_1_1_NewScaffoldedContig_1013	3067	1183	592	591	400	90	290	389	523.785	522.497	263	66	28.116	13.192	49.006
s_1_1_NewScaffoldedContig_1014	4860	1376	694	682	606	160	245	340	563.063	617.052	257	55	22.684	10.955	42.14
s_1_1_NewScaffoldedContig_1015	47303	8610	4269	4341	4732	1414	499	1802	1339.18	1689.83	1365	78	14.968	9.46	33.858
s_1_1_NewScaffoldedContig_1016	15949	1920	992	928	886	312	193	499	1049.56	1560.42	437	37	9.91	9.155	23.857
s_1_1_NewScaffoldedContig_1017	26126	5578	2820	2758	2508	810	771	1424	987.322	1345.2	1109	200	16.815	13.987	34.636
s_1_1_NewScaffoldedContig_1018	53823	17789	8894	8895	9798	2212	1638	3912	1386.73	1694.47	4116	1175	26.065	39.088	39.478
s_1_1_NewScaffoldedContig_1019	6995	2290	1127	1163	1134	272	323	525	932.074	1262.05	438	51	25.425	8.656	46.104
s_1_1_NewScaffoldedContig_1020	4963	1023	468	555	436	144	207	221	632.972	818.698	270	54	17.027	6.359	38.404
s_1_1_NewScaffoldedContig_1021	2635	5643	2906	2737	2024	416	606	2527	519.804	528.097	1561	207	136.998	34.484	63.909
s_1_1_NewScaffoldedContig_1022	23263	3458	1658	1800	1684	658	315	736	1195.72	1630.5	709	53	12.347	9.135	29.592
s_1_1_NewScaffoldedContig_1023	505	15638	7886	7752	264	388	3543	11333	310	17.232	9708	7555	1887.04	2276.5	43.366
s_1_1_NewScaffoldedContig_1024	61999	4260	2093	2167	1990	752	394	1041	991.195	1442.88	805	87	5.747	6.235	24.294
s_1_1_NewScaffoldedContig_1025	4684	1085	565	520	398	110	222	344	555.578	599.778	233	43	17.663	9.189	38.002
s_1_1_NewScaffoldedContig_1026	8685	2483	1191	1292	1176	326	310	631	1075.79	1403.21	575	86	22.699	11.149	41.819
s_1_1_NewScaffoldedContig_1027	38062	13330	6606	6724	7446	1570	1161	2969	1324.67	1629.02	2713	86	26.401	14.041	41.968
s_1_1_NewScaffoldedContig_1028	592	145	77	68	10	12	28	91	293	30.607	45	22	13.103	4.617	69.764
s_1_1_NewScaffoldedContig_1029	2616	444	227	217	52	32	35	322	334.077	25.164	119	57	10.519	14.958	25.229
s_1_1_NewScaffoldedContig_1030	30424	3156	1570	1586	1240	700	320	817	876.713	1250.91	553	115	8.75	7.836	25.595
s_1_1_NewScaffoldedContig_1031	1623	797	412	385	184	48	271	285	334.185	31.347	285	101	33.875	17.654	45.102
s_1_1_NewScaffoldedContig_1032	7532	1991	1033	958	684	208	484	598	1091.05	1664.51	731	129	20.413	19.068	30.483
s_1_1_NewScaffoldedContig_1033	9595	2902	1399	1503	1546	428	296	596	1016.04	1295.69	505	53	23.897	8.343	44.085
s_1_1_NewScaffoldedContig_1034	16548	4508	2243	2265	2610	670	339	814	1155.88	1502.41	830	56	22.173	9.809	41.951
s_1_1_NewScaffoldedContig_1035	4793	1571	811	760	796	200	244	307	589.211	710.047	319	55	27.104	7.512	46.735
s_1_1_NewScaffoldedContig_1036	4274	668	344	324	176	98	205	170	471.227	442.602	208	120	13.06	14.847	25.62
s_1_1_NewScaffoldedContig_1037	15347	3624	1854	1770	2072	624	247	627	1097.04	1494.02	637	50	19.849	8.1	41.304
s_1_1_NewScaffoldedContig_1038	59378	22771	11434	11337	13570	2476	1706	4686	1480.62	1663.14	4783	82	28.038	15.78	43.999
s_1_1_NewScaffoldedContig_1039	5988	86360	43479	42881	13906	5126	26874	39717	333.977	69.267	44205	7942	974.725	1876.8	17.234
s_1_1_NewScaffoldedContig_1040	1722	327	153	174	146	42	78	56	332.192	28.478	58	40	16.445	8.196	35.308
s_1_1_NewScaffoldedContig_1041	15620	2821	1494	1327	858	276	814	838	1087.42	1541.95	1247	792	14.845	56.148	28.316
s_1_1_NewScaffoldedContig_1042	5937	1620	770	850	722	176	340	362	880.047	1140.77	310	54	21.368	12.086	38.774
s_1_1_NewScaffoldedContig_1043	10292	3023	1532	1491	1748	418	312	502	1103.34	1492.96	422	51	24.346	7.702	42.518
s_1_1_NewScaffoldedContig_1044	2591	1012	487	525	376	106	250	273	464.856	453.447	300	62	28.524	9.244	51.602
s_1_1_NewScaffoldedContig_1045	4141	995	520	475	430	134	236	176	514.674	518.367	202	40	19.564	6.727	41.995
s_1_1_NewScaffoldedContig_1046	23304	7484	3678	3806	4130	1022	580	1645	1432.85	1708.08	1611	162	25.216	11.493	43.834
s_1_1_NewScaffoldedContig_1047	21586	6232	3136	3096	3610	654	467	1423	1504.5	1727.45	1306	88	21.283	16.493	36.107
s_1_1_NewScaffoldedContig_1048	7164	1174	563	611	522	198	178	254	560.885	838.949	313	85	13.977	9.699	34.45
s_1_1_NewScaffoldedContig_1049	34886	8686	4319	4367	5312	1248	287	1657	1383.44	1681.67	1851	53	20.585	8.167	41.853
s_1_1_NewScaffoldedContig_1050	43199	20662	10311	10351	12598	2004	1076	4750	1605.28	1727.25	4755	105	33.741	15.084	49.2
s_1_1_NewScaffoldedContig_1051	38208	5964	3026	2938	3156	1020	368	1326	1169.43	1564.57	1113	50	13.08	9.511	31.959
s_1_1_NewScaffoldedContig_1052	30542	13262	6590	6672	8354	1580	347	2828	1470.44	1654.48	2798	66	32.278	10.459	50.105
s_1_1_NewScaffoldedContig_1053	33939	7650	3826	3824	4726	1340	199	1239	1342.06	1676.73	1469	51	18.999	8.207	39.789
s_1_1_NewScaffoldedContig_1054	19172	7284	3572	3712	4368	840	317	1654	1449.69	1682.53	1599	72	28.527	10.439	50.61
s_1_1_NewScaffoldedContig_1055	2579	181	90	91	102	14	27	35	392.118	333.599	29	14	6.612	3.232	37.999
s_1_1_NewScaffoldedContig_1056	35618	6110	3047	3063	3524	994	218	1248	1304.52	1650.66	1091	54	14.59	8.173	36.473
s_1_1_NewScaffoldedContig_1057	10739	1053	547	506	462	164	135	264	734.39	1152.76	263	35	8.44	8.073	24.816
s_1_1_NewScaffoldedContig_1058	1027	142	64	78	54	36	28	22	333.667	33.885	17	22	11.922	4.566	34.08
s_1_1_NewScaffoldedContig_1059	1063	319	172	147	76	32	84	124	328.184	29.189	46	43	22.146	6.743	43.368
s_1_1_NewScaffoldedContig_1060	5524	181	76	105	24	6	49	102	2218.42	2222.61	50	32	2.333	6.019	8.888
s_1_1_NewScaffoldedContig_1061	7584	1602	807	795	860	214	178	321	814.372	1077.67	263	43	17.236	8.495	40.084
s_1_1_NewScaffoldedContig_1062	557	37	21	16	8	4	10	15	348.75	19.93	6	12	5.05	3.293	29.982
s_1_1_NewScaffoldedContig_1063	4203	2872	1487	1385	1108	206	564	960	786.866	763.83	707	93	43.341	15.243	61.884
s_1_1_NewScaffoldedContig_1064	11451	1615	782	833	696	254	300	351	660.072	998.452	320	50	11.511	10.488	26.661
s_1_1_NewScaffoldedContig_1065	12129	2470	1249	1221	1184	408	257	582	1174.66	1599.92	419	48	16.307	10.175	35.815
s_1_1_NewScaffoldedContig_1066	7371	586	269	317	230	84	134	126	505.148	744.211	119	34	6.643	8.728	15.764
s_1_1_NewScaffoldedContig_1067	47931	6931	3419	3512	3892	1222	359	1314	1250.25	1641.13	992	38	12.412	7.758	32.096
s_1_1_NewScaffoldedContig_1068	27245	17055	8576	8479	10392	1322	1306	3881	1725.57	1734.35	3527	140	40.835	18.59	54.693
s_1_1_NewScaffoldedContig_1069	2169	620	330	290	248	90	126	144	332.806	27.677	143	45	24.024	7.496	41.955
s_1_1_NewScaffoldedContig_1070	12606	2788	1507	1281	1390	420	215	724	1211.6	1589.93	566	45	17.466	10.747	34.856
s_1_1_NewScaffoldedContig_1071	2566	510	225	285	172	48	127	154	375.547	227.864	86	37	16.176	8.357	36.438
s_1_1_NewScaffoldedContig_1072	43498	18464	9293	9171	11106	1954	781	4406	1571.68	1699.44	3984	75	29.831	14.706	49.342
s_1_1_NewScaffoldedContig_1073	2600	673	313	360	246	84	140	192	436.593	387.62	103	40	20.523	8.061	39.231
s_1_1_NewScaffoldedContig_1074	3064	643	307	336	186	64	142	242	481.548	491.231	164	96	15.429	11.199	37.239
s_1_1_NewScaffoldedContig_1075	48047	10493	5297	5196	6300	1768	268	1991	1389.56	1673.29	1696	55	17.912	8.801	38.962
s_1_1_NewScaffoldedContig_1076	12058	3222	1650	1572	1632	406	414	725	994.838	1402.09	797	57	20.93	13.427	36.449
s_1_1_NewScaffoldedContig_1077	2365	976	487	489	340	100	248	276	447.553	381.658	200	53	28.178	10.115	60.254
s_1_1_NewScaffoldedContig_1078	2980	1058	513	545	340	98	306	300	428.859	371.228	390	396	25.299	40.541	40
s_1_1_NewScaffoldedContig_1079	687	492	282	210	72	62	75	279	318.389	34.637	318	172	46.028	40.159	58.224
s_1_1_NewScaffoldedContig_1080	12558	4280	2102	2178	2466	386	320	1063	1383.33	1573.89	810	65	24.841	15.891	43.128
s_1_1_NewScaffoldedContig_1081	9288	1248	640	608	618	252	110	224	877.498	1362.22	228	29	12.408	6.214	34.065
s_1_1_NewScaffoldedContig_1082	44906	7351	3629	3722	4316	1358	307	1224	1242.95	1641.14	1294	59	14.117	7.956	34.309
s_1_1_NewScaffoldedContig_1083	45691	10456	5328	5128	6390	1492	373	1997	1412.01	1715.89	1751	59	18.728	10.704	37.727
s_1_1_NewScaffoldedContig_1084	66502	17680	8816	8864	10690	2542	731	3445	1297.04	1632.95	4158	163	21.723	11.341	40.063
s_1_1_NewScaffoldedContig_1085	49079	23982	11996	11986	15028	2318	1099	5279	1686.23	1727.46	4245	147	34.25	14.836	50.718
s_1_1_NewScaffoldedContig_1086	1089	535	245	290	160	38	165	169	330.3	26.145	118	55	33.102	9.834	57.851
s_1_1_NewScaffoldedContig_1087	48778	14523	7290	7233	8378	1882	840	3220	1356.7	1646.99	2634	65	23.041	12.91	40.752
s_1_1_NewScaffoldedContig_1088	14660	5929	2987	2942	3470	658	461	1281	1417.35	1663.21	951	69	30.226	11.287	47.804
s_1_1_NewScaffoldedContig_1089	6672	1557	775	782	714	210	255	358	807.924	1106.4	306	39	18.704	8.908	37.725
s_1_1_NewScaffoldedContig_1090	1441	1361	599	762	80	40	625	604	333.1	29.57	1104	594	74.93	127.488	44.83
s_1_1_NewScaffoldedContig_1091	38084	13397	6749	6648	8054	1578	589	2997	1511.71	1688.05	2770	76	26.379	13.605	45.52
s_1_1_NewScaffoldedContig_1092	2471	281	158	123	156	12	47	63	351.115	149.546	45	27	10.118	5.181	42.817
s_1_1_NewScaffoldedContig_1093	1935	1368	599	769	374	90	373	520	370.144	230.499	497	271	47.027	32.964	57.726
s_1_1_NewScaffoldedContig_1094	7802	2168	1079	1089	694	196	529	726	968.32	1492.72	890	367	19.826	35.457	28.198
s_1_1_NewScaffoldedContig_1095	61949	19270	9601	9669	11544	2516	692	4230	1405.47	1675.58	3990	74	24.434	12.637	42.483
s_1_1_NewScaffoldedContig_1096	8670	1774	851	923	848	350	176	372	1118.41	1523.53	266	38	17.001	8.168	37.958
s_1_1_NewScaffoldedContig_1097	4106	1540	797	743	700	170	295	359	455.151	440.012	342	54	29.55	9.174	44.861
s_1_1_NewScaffoldedContig_1098	34500	9065	4506	4559	5492	1326	371	1696	1360.45	1669.48	1414	56	21.376	9.397	41.464
s_1_1_NewScaffoldedContig_1099	1761	27292	13262	14030	2506	1096	9623	13820	353.711	158.484	17891	4150	1037.65	774.422	50.71
s_1_1_NewScaffoldedContig_1100	17712	7333	3743	3590	4068	644	702	1833	1425.09	1641.19	1620	79	28.678	18.353	44.715
s_1_1_NewScaffoldedContig_1101	36830	12498	6221	6277	7448	1396	734	2772	1489.23	1674.05	2488	75	24.744	12.828	47.448
s_1_1_NewScaffoldedContig_1102	10318	2850	1511	1339	1580	268	309	648	1331.45	1536.01	563	60	20.545	15.408	37.091
s_1_1_NewScaffoldedContig_1103	16344	2871	1432	1439	1654	466	150	556	1155.55	1538.51	476	51	14.626	8.095	35.738
s_1_1_NewScaffoldedContig_1104	26354	6346	3262	3084	3256	920	739	1302	1406.64	1730.07	1697	523	19.491	26.948	37.85
s_1_1_NewScaffoldedContig_1105	2027	131	74	57	24	10	25	72	1484.58	658.363	24	33	4.375	8.168	14.603
s_1_1_NewScaffoldedContig_1106	12622	4868	2408	2460	2424	424	703	1262	1046.23	1300.04	1034	74	26.998	16.938	43.559
s_1_1_NewScaffoldedContig_1107	2220	1224	619	605	468	138	326	274	389.038	291.796	333	68	40.336	11.225	57.793
s_1_1_NewScaffoldedContig_1108	4351	987	481	506	418	118	244	192	567.077	589.619	179	39	18.035	6.998	40.749
s_1_1_NewScaffoldedContig_1109	43923	15929	7923	8006	10148	1796	600	3188	1509.68	1701.53	3127	76	27.234	12.899	45.735
s_1_1_NewScaffoldedContig_1110	121272	25648	12809	12839	15238	3976	1076	4918	1382.91	1710.63	4507	548	17.33	14.01	37.206
s_1_1_NewScaffoldedContig_1111	23795	5061	2557	2504	2854	818	306	984	1306.95	1671.19	933	51	17.634	10.516	37.155
s_1_1_NewScaffoldedContig_1112	8392	1918	968	950	916	354	201	396	819.426	1138.62	405	47	18.953	8.258	39.788
s_1_1_NewScaffoldedContig_1113	1097	65	42	23	20	6	24	13	331.5	40.391	14	10	4.624	2.049	34.549
s_1_1_NewScaffoldedContig_1114	12142	4216	2143	2073	2182	358	544	1093	1289.08	1527.24	822	73	24.591	20.049	34.772
s_1_1_NewScaffoldedContig_1115	26604	10898	5541	5357	6870	1202	555	2141	1523.23	1697.87	1990	71	30.792	12.345	47.654
s_1_1_NewScaffoldedContig_1116	14587	1655	809	846	838	336	155	297	857.282	1312.71	306	33	9.998	7.249	28.183
s_1_1_NewScaffoldedContig_1117	2430	346	172	174	116	80	65	73	331.741	27.484	75	29	12.498	5.573	35.185
s_1_1_NewScaffoldedContig_1118	36825	7840	3909	3931	4550	1316	242	1608	1348.3	1660.74	1561	65	17.671	8.449	39.606
s_1_1_NewScaffoldedContig_1119	31111	4956	2506	2450	2846	858	215	930	1153.07	1549.95	900	44	13.754	8.724	32.641
s_1_1_NewScaffoldedContig_1120	14817	4002	2007	1995	2132	582	439	796	949.086	1353.17	989	50	22.349	9.145	42.094
s_1_1_NewScaffoldedContig_1121	11912	4780	2350	2430	596	308	2256	1571	715.477	1143.69	3388	2290	35.021	197.274	26.192
s_1_1_NewScaffoldedContig_1122	2011	334	212	122	0	8	164	160			262	241	9.857	35.389	10.393
s_1_1_NewScaffoldedContig_1123	1193	1032	534	498	108	36	452	427	341.556	30.469	771	266	60.734	60.122	45.264
s_1_1_NewScaffoldedContig_1124	4774	1195	596	599	446	162	290	276	457.834	478.74	287	90	20.023	10.014	39.443
s_1_1_NewScaffoldedContig_1125	2095	272	135	137	100	66	51	50	334.5	25.426	56	25	11.706	5.697	35.895
s_1_1_NewScaffoldedContig_1126	27394	8051	3918	4133	4966	828	332	1839	1727.65	1755.94	1162	71	20.055	10.337	51.577
s_1_1_NewScaffoldedContig_1127	12563	2303	1180	1123	1106	432	218	499	1089.3	1462.72	357	40	15.226	6.757	36.265
s_1_1_NewScaffoldedContig_1128	29206	6021	2996	3025	3420	1040	371	1070	1232.09	1589.83	1141	49	17.387	8.51	39.002
s_1_1_NewScaffoldedContig_1129	1165	567	312	255	174	48	209	131	329.609	28.282	215	79	33.561	13.119	53.133
s_1_1_NewScaffoldedContig_1130	4717	1183	622	561	376	84	279	427	703.527	672.623	197	57	17.482	14.59	36.188
s_1_1_NewScaffoldedContig_1131	5713	1267	608	659	348	118	324	462	333.299	29.014	330	98	16.392	22.516	21.197
s_1_1_NewScaffoldedContig_1132	30904	9352	4639	4713	5662	1250	477	1824	1411.55	1687.94	2392	125	23.87	10.457	43.687
s_1_1_NewScaffoldedContig_1133	8984	2158	1050	1108	716	192	473	748	1138.24	1573.73	596	138	16.282	18.569	28.161
s_1_1_NewScaffoldedContig_1134	1927	396	197	199	92	96	66	132	328.152	28.603	88	41	17.369	8.572	38.142
s_1_1_NewScaffoldedContig_1135	12271	2680	1291	1389	1346	386	305	603	991.336	1409.01	473	52	17.989	9.448	37.079
s_1_1_NewScaffoldedContig_1136	26621	4504	2247	2257	2260	742	356	1076	1246.28	1587.02	699	52	13.812	10.502	31.34
s_1_1_NewScaffoldedContig_1137	25054	6100	3053	3047	3758	976	172	1076	1316.89	1641.23	1433	46	20.228	7.962	41.71
s_1_1_NewScaffoldedContig_1138	10909	5092	2601	2491	2526	444	758	1292	1284.79	1584.17	1118	105	33.915	16.495	46.439
s_1_1_NewScaffoldedContig_1139	2231	363	181	182	152	58	69	80	414.237	345.24	83	29	13.194	4.983	38.368
s_1_1_NewScaffoldedContig_1140	18122	6099	2998	3101	3252	778	558	1414	1274.72	1549.45	1480	453	26.039	26.546	41.563
s_1_1_NewScaffoldedContig_1141	18904	2662	1352	1310	1242	436	315	633	1053.14	1481.9	520	65	11.126	11.133	28.777
s_1_1_NewScaffoldedContig_1142	5126	1321	666	655	550	174	237	345	624.065	666.661	288	72	20.134	9.052	41.787
s_1_1_NewScaffoldedContig_1143	27564	8068	4094	3974	5006	1076	303	1558	1396.82	1673.63	1587	57	23.435	9.712	44.569
s_1_1_NewScaffoldedContig_1144	2996	658	332	326	196	104	175	174	449.857	412.775	124	36	16.973	6.271	38.151
s_1_1_NewScaffoldedContig_1145	8032	2069	996	1073	878	196	296	685	852.198	1181.25	495	52	18.776	14.179	38.533
s_1_1_NewScaffoldedContig_1146	9827	2504	1209	1295	1214	290	358	601	1098.79	1480.97	427	58	19.489	14.149	35.341
s_1_1_NewScaffoldedContig_1147	25452	10075	4996	5079	6450	1012	506	1985	1502.29	1688.27	2025	86	29.379	11.178	50.507
s_1_1_NewScaffoldedContig_1148	16668	46028	22958	23070	24708	4730	3745	12383	1448.21	1628.21	12844	336	194.666	69.043	52.958
s_1_1_NewScaffoldedContig_1149	1444	376	176	200	116	10	143	104	328.69	26.227	106	37	17.485	8.013	63.227
s_1_1_NewScaffoldedContig_1150	13363	1643	894	749	536	142	423	515	936.119	1254.52	658	283	9.486	22.767	25.541
s_1_1_NewScaffoldedContig_1151	5544	173	81	92	32	34	37	68	340.312	30.242	28	22	2.391	4.447	10.299
s_1_1_NewScaffoldedContig_1152	4014	1012	506	506	420	164	193	219	399.048	316.579	198	47	20.839	6.746	40.683
s_1_1_NewScaffoldedContig_1153	26587	2716	1325	1391	1284	516	345	504	992.97	1494.64	527	45	8.91	8.969	21.556
s_1_1_NewScaffoldedContig_1154	44802	9833	4877	4956	5538	1622	554	1921	1177.48	1580.85	1679	54	18.336	9.552	38.28
s_1_1_NewScaffoldedContig_1155	44370	7415	3682	3733	3844	1182	656	1558	1253.64	1627.43	1421	134	13.985	10.28	33.78
s_1_1_NewScaffoldedContig_1156	30192	5208	2537	2671	2580	804	394	1371	1313.07	1721.86	984	53	13.749	11.334	30.293
s_1_1_NewScaffoldedContig_1157	2493	796	414	382	264	74	219	228	459.614	442.893	226	95	23.434	11.434	45.126
s_1_1_NewScaffoldedContig_1158	725	100	32	68	2	26	34	38	379	0	15	30	10.4	8.779	32.414
s_1_1_NewScaffoldedContig_1159	6203	1039	524	515	438	198	145	238	862.9	1153.82	167	32	13.904	5.412	36.402
s_1_1_NewScaffoldedContig_1160	3698	542	274	268	190	72	136	133	530.284	519.856	95	35	11.95	10.077	25.257
s_1_1_NewScaffoldedContig_1161	8508	1681	830	851	914	268	185	281	1109.57	1497.16	312	38	16.573	7.901	38
s_1_1_NewScaffoldedContig_1162	27281	5545	2773	2772	3136	906	320	1091	1259.85	1641.88	1081	52	17.008	9.629	36.934
s_1_1_NewScaffoldedContig_1163	11581	4947	2374	2573	2762	554	344	1214	1237.4	1478.06	966	78	31.261	10.955	49.84
s_1_1_NewScaffoldedContig_1164	14650	2338	1179	1159	1182	310	265	539	1034.59	1486.55	522	47	13.16	12.208	25.611
s_1_1_NewScaffoldedContig_1165	17538	3883	1936	1947	1776	424	537	1102	1060.31	1445.8	723	68	17.25	13.942	31.919
s_1_1_NewScaffoldedContig_1166	979	72	38	34	22	8	15	26	319.455	21.017	15	13	6.732	2.506	34.729
s_1_1_NewScaffoldedContig_1167	8389	5518	3194	2324	1802	366	1595	1700	1162.24	1421.4	2444	1624	45.618	135.314	50.662
s_1_1_NewScaffoldedContig_1168	20040	6092	2996	3096	3416	620	566	1402	1195.99	1507.77	1525	65	22.97	14.266	41.362
s_1_1_NewScaffoldedContig_1169	21964	5033	2494	2539	2818	780	377	953	1137.9	1533.97	963	54	19.287	8.156	40.207
s_1_1_NewScaffoldedContig_1170	29560	5283	2640	2643	2962	982	180	1057	1174.73	1568.41	1021	47	15.188	8.789	34.726
s_1_1_NewScaffoldedContig_1171	28162	9817	4883	4934	5378	1092	1021	2217	1244.28	1571.48	2237	168	26.347	15.864	40.445
s_1_1_NewScaffoldedContig_1172	9244	635	329	306	264	84	64	206	522.78	505.827	146	33	5.872	6.987	22.977
s_1_1_NewScaffoldedContig_1173	6467	1714	869	845	676	212	329	458	1031.06	1413.77	547	271	21.367	23.737	39.756
s_1_1_NewScaffoldedContig_1174	3837	1176	555	621	474	160	298	232	560.924	583.474	292	48	23.66	7.433	48.293
s_1_1_NewScaffoldedContig_1175	4635	3020	1443	1577	836	202	979	976	527.962	544.837	1224	806	46.852	86.256	52.837
s_1_1_NewScaffoldedContig_1176	2080	392	192	200	134	68	76	105	334	27.482	104	32	15.119	7.052	41.442
s_1_1_NewScaffoldedContig_1177	3696	624	270	354	214	78	163	161	455.383	420.472	120	34	13.19	7.351	33.902
s_1_1_NewScaffoldedContig_1178	831	1867	986	881	114	46	589	1109	337.807	33.404	1258	532	144.289	112.305	49.458
s_1_1_NewScaffoldedContig_1179	5351	9370	4311	5059	1060	622	3590	4022	329.709	31.343	4416	945	123.037	211.178	13.96
s_1_1_NewScaffoldedContig_1180	29050	6370	3139	3231	3752	1036	292	1178	1332.09	1673.22	1243	122	18.09	9.207	39.25
s_1_1_NewScaffoldedContig_1181	586	315	164	151	48	28	99	137	330.833	25.149	150	99	34.476	20.303	47.44
s_1_1_NewScaffoldedContig_1182	5673	628	271	357	96	26	216	286	342.708	30.379	376	198	7.224	19.474	11.881
s_1_1_NewScaffoldedContig_1183	709	131	61	70	48	20	32	30	342.083	28.56	35	28	15.307	5.149	39.915
s_1_1_NewScaffoldedContig_1184	6133	1877	983	894	986	262	269	338	756.895	1019.06	429	51	24.889	9.077	44.171
s_1_1_NewScaffoldedContig_1185	7461	3968	2020	1948	2004	374	492	1054	1353.17	1534.3	672	77	35.957	14.006	58.652
s_1_1_NewScaffoldedContig_1186	7354	1138	509	629	520	188	171	238	950.488	1411.41	236	36	13.014	5.679	37.014
s_1_1_NewScaffoldedContig_1187	34247	5464	2720	2744	3102	896	275	1054	1265.76	1628.32	997	40	13.786	7.247	36.123
s_1_1_NewScaffoldedContig_1188	5155	2065	1049	1016	822	178	569	471	462.462	442.78	465	66	29.75	12.201	48.264
s_1_1_NewScaffoldedContig_1189	2517	1532	737	795	554	92	340	534	509.307	495.49	390	66	40.448	10.009	58.562
s_1_1_NewScaffoldedContig_1190	51546	14350	7151	7199	8926	1998	548	2673	1354.74	1670.18	3158	60	22.637	10.369	41.173
s_1_1_NewScaffoldedContig_1191	699	4101	2226	1875	1422	480	730	1420	332.501	27.034	2283	688	488.123	182.529	45.494
s_1_1_NewScaffoldedContig_1192	33457	5701	2823	2878	3352	888	253	1084	1236.41	1608.39	922	50	14.431	8.827	34.471
s_1_1_NewScaffoldedContig_1193	4703	2939	1460	1479	1346	254	492	808	732.171	776.555	698	86	42.262	13.933	63.491
s_1_1_NewScaffoldedContig_1194	14190	2951	1475	1476	1562	460	170	705	1112.05	1426.57	481	42	16.643	9.442	37.773
s_1_1_NewScaffoldedContig_1195	19661	7124	3619	3505	4172	844	326	1691	1488.41	1720.51	1332	71	27.574	14.59	45.73
s_1_1_NewScaffoldedContig_1196	28561	10119	5070	5049	6322	1216	489	1944	1460.73	1683.32	1973	111	27.761	11.485	45.44
s_1_1_NewScaffoldedContig_1197	21071	2709	1361	1348	1432	466	232	502	1088.07	1518.78	488	36	11.288	7.54	30.283
s_1_1_NewScaffoldedContig_1198	801	141	66	75	40	34	40	26	336.95	33.215	34	26	14.559	6.061	37.328
s_1_1_NewScaffoldedContig_1199	1993	1223	629	594	296	80	390	442	353.014	176.205	413	145	40.45	22.004	56.698
s_1_1_NewScaffoldedContig_1200	39413	5601	2843	2758	2748	1052	458	1234	1111.18	1508.96	1035	115	12.019	9.508	30.343
s_1_1_NewScaffoldedContig_1201	1227	662	289	373	210	50	131	262	330.99	29.5	142	71	36.762	14.457	62.51
s_1_1_NewScaffoldedContig_1202	10404	1180	580	600	476	254	152	266	789.21	1201.97	252	42	9.828	7.858	28.114
s_1_1_NewScaffoldedContig_1203	1522	207	108	99	60	46	40	58	336.233	15.459	26	24	11.632	4.184	34.428
s_1_1_NewScaffoldedContig_1204	36690	7729	3867	3862	4072	1148	668	1699	1235.4	1619.91	1862	150	17.407	11.118	34.911
s_1_1_NewScaffoldedContig_1205	1917	556	276	280	180	76	142	146	332.211	23.001	168	59	23.646	10.245	42.045
s_1_1_NewScaffoldedContig_1206	76890	14551	7254	7297	8354	2342	616	2934	1309.85	1651.98	2947	126	15.935	9.918	34.173
s_1_1_NewScaffoldedContig_1207	31036	7163	3543	3620	4120	1002	320	1608	1325.08	1609.05	1376	65	18.425	14.209	32.82
s_1_1_NewScaffoldedContig_1208	66333	15477	7698	7779	9488	2420	546	2771	1464.31	1756.32	2747	54	19.083	8.164	41.548
s_1_1_NewScaffoldedContig_1209	896	13051	6198	6853	6	326	3327	9297	371.667	3.859	3930	4347	959.549	1303.62	29.799
s_1_1_NewScaffoldedContig_1210	612	16614	7772	8842	980	650	3914	10938	335.947	25.586	4658	4604	1713.95	1501.1	38.072
s_1_1_NewScaffoldedContig_1211	49381	14496	7277	7219	8872	1850	606	2981	1390.42	1666.73	3459	167	23.229	11.702	43.569
s_1_1_NewScaffoldedContig_1212	26178	3600	1845	1755	1704	612	445	779	970.871	1410.38	758	37	11.444	9.6	25.999
s_1_1_NewScaffoldedContig_1213	29661	4413	2168	2245	2468	830	196	818	1230.81	1636.35	644	39	12.895	8.222	32.174
s_1_1_NewScaffoldedContig_1214	35313	7106	3620	3486	3924	1202	453	1396	1217.04	1593.98	1205	47	16.829	8.496	36.199
s_1_1_NewScaffoldedContig_1215	48669	15116	7601	7515	9438	2260	440	2754	1397.63	1688.03	3065	59	24.931	8.4	44.914
s_1_1_NewScaffoldedContig_1216	832	148	71	77	42	24	36	44	334.619	19.271	22	26	14.635	5.453	38.101
s_1_1_NewScaffoldedContig_1217	10132	2402	1181	1221	882	360	498	624	829.583	1269.54	981	510	20.295	41.202	37.15
s_1_1_NewScaffoldedContig_1218	2549	621	339	282	228	96	134	155	437.289	410.157	91	48	19.348	10.187	42.134
s_1_1_NewScaffoldedContig_1219	13154	3875	1881	1994	2140	552	379	738	1095.3	1468.12	756	60	23.989	9.847	42.367
s_1_1_NewScaffoldedContig_1220	809	262	152	110	60	20	66	113	335.333	38.965	71	45	24.064	12.197	45.488
s_1_1_NewScaffoldedContig_1221	6389	936	514	422	160	64	254	446	330.588	33.521	501	143	9.754	19.706	15.777
s_1_1_NewScaffoldedContig_1222	47159	3792	1880	1912	2016	564	294	860	1087.42	1470.47	597	45	6.59	6.344	26.888
s_1_1_NewScaffoldedContig_1223	29399	10032	4989	5043	5626	1170	716	2382	1436.35	1644.76	2124	178	24.99	16.425	42.168
s_1_1_NewScaffoldedContig_1224	42303	6914	3450	3464	3924	1248	312	1271	1223.08	1576.45	1355	50	13.957	9.151	32.546
s_1_1_NewScaffoldedContig_1225	21097	4848	2361	2487	2252	662	532	1330	1100.25	1452.97	1143	61	18.441	12.816	34.673
s_1_1_NewScaffoldedContig_1226	5448	1162	562	600	540	192	184	230	613.944	753.843	265	38	17.728	7.379	38.418
s_1_1_NewScaffoldedContig_1227	24890	6418	3317	3101	1056	486	2384	2421	1037.78	1510.62	3898	1010	19.579	75.425	24.616
s_1_1_NewScaffoldedContig_1228	4756	2195	1086	1109	916	214	364	672	721.159	810.456	528	77	31.087	11.91	57.948
s_1_1_NewScaffoldedContig_1229	1021	8136	3949	4187	948	674	2781	3649	332.238	29.167	3490	1048	501.861	250.815	58.962
s_1_1_NewScaffoldedContig_1230	48720	7922	3964	3958	4198	1416	431	1712	1111.16	1464.39	1182	49	13.649	8.937	33.245
s_1_1_NewScaffoldedContig_1231	962	338	175	163	98	38	87	112	327.265	27.434	59	66	28.031	13.168	45.114
s_1_1_NewScaffoldedContig_1232	9095	1597	780	817	796	286	178	313	924.141	1289.62	254	34	14.811	5.948	36.581
s_1_1_NewScaffoldedContig_1233	11413	6912	3433	3479	3882	620	347	1984	1507.23	1594.1	1601	91	40.545	13.191	56.725
s_1_1_NewScaffoldedContig_1234	17845	4934	2454	2480	2988	738	259	878	1229.13	1575.62	1023	64	22.556	8.55	42.382
s_1_1_NewScaffoldedContig_1235	13336	5896	2965	2931	3422	632	458	1324	1430.6	1634.66	1362	64	31.736	12.913	49.46
s_1_1_NewScaffoldedContig_1236	5844	705	361	344	254	96	126	212	479.803	483.779	213	35	9.847	6.985	28.354
s_1_1_NewScaffoldedContig_1237	2893	614	312	302	194	98	156	153	354.732	174.399	153	38	17.337	8.029	38.541
s_1_1_NewScaffoldedContig_1238	739	382	185	197	64	32	136	147	331.438	29.755	215	85	34.553	16.474	46.008
s_1_1_NewScaffoldedContig_1239	6968	3097	1533	1564	1650	394	374	643	1070.1	1349.33	697	61	33.562	8.756	49.168
s_1_1_NewScaffoldedContig_1240	9627	3328	1655	1673	1532	414	558	778	1057.4	1437.31	1138	245	27.558	18.977	44.032
s_1_1_NewScaffoldedContig_1241	30454	12536	6232	6304	6768	1322	1132	3182	1476.88	1674.07	2604	287	29.635	19.247	42.838
s_1_1_NewScaffoldedContig_1242	34144	8207	4067	4140	4958	1156	268	1685	1323.09	1640.57	1698	53	19.722	8.299	41.814
s_1_1_NewScaffoldedContig_1243	26085	15336	7604	7732	9474	1390	695	3612	1647.94	1706.64	3237	86	40.313	13.311	57.209
s_1_1_NewScaffoldedContig_1244	25412	3937	2002	1935	2166	698	235	766	1078.63	1502.39	740	53	13.171	8.895	32.78
s_1_1_NewScaffoldedContig_1245	23208	3880	1923	1957	2006	656	323	793	1337.98	1694.99	815	254	14.086	13.516	32.571
s_1_1_NewScaffoldedContig_1246	16563	2665	1350	1315	1348	412	249	606	1108.37	1509.42	405	50	13.37	9.988	30.031
s_1_1_NewScaffoldedContig_1247	966	126	77	49	30	12	41	42	331.067	23.199	10	23	10.077	4.317	35.818
s_1_1_NewScaffoldedContig_1248	16261	3615	1814	1801	1996	498	313	750	1244.43	1634.8	670	47	18.182	7.307	40.656
s_1_1_NewScaffoldedContig_1249	833	13268	7209	6059	1716	992	5173	5231	324.903	27.989	6018	1744	1006.4	416.483	69.148
s_1_1_NewScaffoldedContig_1250	2964	1363	671	692	522	156	387	280	433.87	390.406	336	62	34.015	11.748	51.417
s_1_1_NewScaffoldedContig_1251	7094	2966	1512	1454	1382	320	516	714	873.577	1155.82	642	60	31.016	9.977	50.592
s_1_1_NewScaffoldedContig_1252	530	248	102	146	26	14	101	104	356.846	45.448	62	48	25.764	11.916	68.302
s_1_1_NewScaffoldedContig_1253	1470	331	191	140	108	46	86	87	336.315	28.558	100	35	17.74	7.745	37.823
s_1_1_NewScaffoldedContig_1254	1607	597	324	273	172	62	169	189	336.314	26.576	184	93	28.444	14.915	44.244
s_1_1_NewScaffoldedContig_1255	9343	3970	1897	2073	2162	404	378	969	1246.76	1447.92	801	65	30.515	11.457	53.998
s_1_1_NewScaffoldedContig_1256	15043	3050	1497	1553	1326	360	507	815	939.06	1317.31	599	54	15.84	11.239	34.814
s_1_1_NewScaffoldedContig_1257	5404	2918	1467	1451	1266	248	493	878	961.872	1097.82	540	73	36.681	11.065	58.346
s_1_1_NewScaffoldedContig_1258	36386	9843	4956	4887	6158	1422	345	1751	1377.13	1686.52	1401	55	22.088	9.244	42.063
s_1_1_NewScaffoldedContig_1259	30630	5085	2670	2415	2488	746	659	1094	1268.96	1669.64	1203	388	13.798	20.86	31.773
s_1_1_NewScaffoldedContig_1260	1453	677	300	377	168	62	215	224	331.345	26.862	166	104	32.615	16.695	48.383
s_1_1_NewScaffoldedContig_1261	8301	2857	1472	1385	1302	404	488	606	601.134	740.237	752	78	28.031	12.268	42.597
s_1_1_NewScaffoldedContig_1262	8727	1464	749	715	770	288	135	252	778.995	1127.46	355	40	14.691	6.257	37.275
s_1_1_NewScaffoldedContig_1263	1558	258	132	126	104	26	57	66	332.385	25.145	48	29	13.937	5.925	33.569
s_1_1_NewScaffoldedContig_1264	24184	4309	2216	2093	2202	690	272	1072	1153.76	1519.66	928	44	14.82	9.603	32.84
s_1_1_NewScaffoldedContig_1265	9967	2553	1243	1310	1344	358	233	581	992.375	1395.9	556	70	21.086	13.003	37.724
s_1_1_NewScaffoldedContig_1266	7769	1855	894	961	922	278	227	390	908.132	1282.78	301	44	19.678	7.094	40.404
s_1_1_NewScaffoldedContig_1267	39501	16532	8278	8254	9314	1440	1371	4261	1601.68	1737.82	3567	919	28.42	32.52	50.586
s_1_1_NewScaffoldedContig_1268	22066	11127	5656	5471	6732	1024	640	2611	1536.96	1620.22	2446	185	35.542	16.506	53.802
s_1_1_NewScaffoldedContig_1269	7598	3645	1837	1808	1630	394	708	883	908.649	1182.3	695	108	34.74	13.164	49.71
s_1_1_NewScaffoldedContig_1270	14416	1991	986	1005	854	306	341	457	1093.19	1525.75	512	244	11.116	14.942	27.123
s_1_1_NewScaffoldedContig_1271	42453	9282	4677	4605	5210	1272	629	2023	1263.66	1656.4	2030	61	18.035	10.897	35.689
s_1_1_NewScaffoldedContig_1272	1868	513	261	252	168	106	100	129	329.738	26.414	95	43	23.325	8.4	42.773
s_1_1_NewScaffoldedContig_1273	64717	24099	12124	11975	15128	2836	818	5017	1440.04	1681.92	5534	65	28.172	11.378	47.365
s_1_1_NewScaffoldedContig_1274	68016	19172	9541	9631	11862	2792	604	3659	1402.92	1695.72	3699	64	22.813	10.14	41.789
s_1_1_NewScaffoldedContig_1275	2766	349	174	175	204	22	50	65	477.01	477.03	63	23	10.687	4.269	44.143
s_1_1_NewScaffoldedContig_1276	962	378	195	183	52	14	131	177	338.308	37.091	228	87	27.545	18.224	48.545
s_1_1_NewScaffoldedContig_1277	4061	2037	973	1064	670	176	515	654	504.236	499.107	650	181	36.686	22.951	46.442
s_1_1_NewScaffoldedContig_1278	92784	26921	13587	13334	16628	3768	882	5297	1447.73	1709.54	5643	135	23.071	11.31	41.511
s_1_1_NewScaffoldedContig_1279	51425	15861	7995	7866	9650	2182	721	3099	1451.48	1731.41	3233	64	24.231	11.532	41.435
s_1_1_NewScaffoldedContig_1280	1649	359	174	185	116	50	98	91	339.517	33.43	64	38	17.443	6.845	39.357
s_1_1_NewScaffoldedContig_1281	15748	3418	1687	1731	1872	572	193	723	1192.82	1586.18	675	45	17.934	9.367	39.122
s_1_1_NewScaffoldedContig_1282	2003	656	304	352	224	60	197	167	349.277	135.939	131	68	24.308	10.738	49.276
s_1_1_NewScaffoldedContig_1283	33592	10514	5197	5317	6510	1454	422	1978	1397.24	1673.67	2243	67	24.721	11.876	40.804
s_1_1_NewScaffoldedContig_1284	4688	2188	1025	1163	440	252	288	1179	469.327	435.615	898	345	28.456	43.107	34.279
s_1_1_NewScaffoldedContig_1285	74061	25744	13022	12722	16256	2962	958	5233	1499.54	1707.99	5386	115	26.712	13.059	42.727
s_1_1_NewScaffoldedContig_1286	17297	15945	7898	8047	6544	2240	2234	4648	578.439	919.722	9333	883	77.749	181.144	36.515
s_1_1_NewScaffoldedContig_1287	522	2651	1372	1279	200	138	711	1585	347.98	36.865	1801	753	365.858	237.132	48.659
s_1_1_NewScaffoldedContig_1288	1208	1942	934	1008	528	124	609	658	334.848	27.734	692	262	116.249	38.8	53.146
s_1_1_NewScaffoldedContig_1289	21769	4914	2444	2470	2654	764	413	996	1205.17	1588.1	1242	114	18.72	11.208	36.772
s_1_1_NewScaffoldedContig_1290	28339	7358	3621	3737	4452	1090	357	1344	1399.61	1691.58	1404	58	20.888	9.215	42.782
s_1_1_NewScaffoldedContig_1291	1781	144	74	70	68	20	20	32	339.588	31.973	23	15	7.622	2.552	41.101
s_1_1_NewScaffoldedContig_1292	27923	5891	2991	2900	3128	966	487	1202	1035.47	1466.22	1167	112	17.843	9.738	38.603
s_1_1_NewScaffoldedContig_1293	12246	6737	3352	3385	3816	612	553	1685	1549.53	1670.73	1387	66	38.273	11.723	54.001
s_1_1_NewScaffoldedContig_1294	14998	1419	729	690	536	190	236	439	1043.19	1459.87	210	53	7.393	10.54	16.949
s_1_1_NewScaffoldedContig_1295	3499	1022	538	484	404	142	247	217	636.079	626.242	167	49	22.187	9.296	46.127
s_1_1_NewScaffoldedContig_1296	9701	3377	1706	1671	1918	440	281	692	1001.33	1371.7	713	50	28.237	8.577	44.037
s_1_1_NewScaffoldedContig_1297	14442	5310	2594	2716	3026	550	473	1199	1277.45	1538.74	1100	62	27.981	11.008	46.482
s_1_1_NewScaffoldedContig_1298	33721	5333	2731	2602	2622	932	511	1152	1083.24	1500.98	1319	201	13.449	13.524	29.815
s_1_1_NewScaffoldedContig_1299	3566	805	429	376	90	62	384	265	324.378	27.486	483	389	16.371	47.927	19.602
s_1_1_NewScaffoldedContig_1300	15274	8415	4213	4202	5054	726	755	1803	1662.13	1704.32	1702	80	36.627	11.475	58.282
s_1_1_NewScaffoldedContig_1301	6993	1146	590	556	576	188	114	247	960.128	1436.41	207	41	13.884	8.812	34.02
s_1_1_NewScaffoldedContig_1302	25760	7381	3692	3689	4460	1098	289	1409	1317.07	1639.03	1596	58	23.317	8.496	42.822
s_1_1_NewScaffoldedContig_1303	6438	2432	1233	1199	1312	238	384	474	979.817	1240.16	407	51	28.625	8.671	48.804
s_1_1_NewScaffoldedContig_1304	726	504	274	230	90	78	59	275	333.156	23.542	187	98	48.974	23.884	55.372
s_1_1_NewScaffoldedContig_1305	66436	6380	3197	3183	3318	1098	360	1517	1087.25	1503.43	1053	90	7.755	7.258	29.32
s_1_1_NewScaffoldedContig_1306	13564	2142	1108	1034	1194	322	111	468	943.72	1304.95	401	45	13.532	8.746	32.284
s_1_1_NewScaffoldedContig_1307	24746	2304	1157	1147	752	346	536	628	721.245	1132.89	795	315	7.547	17.412	16.904
s_1_1_NewScaffoldedContig_1308	30404	12544	6238	6306	7142	1422	1051	2758	1373.26	1621.76	2826	115	31.099	11.95	48.247
s_1_1_NewScaffoldedContig_1309	47906	9432	4691	4741	5638	1616	352	1649	1214.91	1606.71	2193	55	16.582	8.57	38.033
s_1_1_NewScaffoldedContig_1310	14719	6702	3161	3541	2468	626	1393	2158	1331.87	1562.46	2557	1676	32.604	97.885	39.649
s_1_1_NewScaffoldedContig_1311	7547	3504	1752	1752	726	182	1289	1275	499.052	501.977	1915	698	33.728	77.599	39.128
s_1_1_NewScaffoldedContig_1312	7572	16225	7672	8553	1294	1326	4448	9022	347.076	44.453	9218	1763	157.611	424.36	11.278
s_1_1_NewScaffoldedContig_1313	911	10105	4667	5438	1006	534	3154	5309	337.26	34.261	6128	1834	809.308	522.861	42.371
s_1_1_NewScaffoldedContig_1314	5584	30570	14579	15991	140	662	10213	19218	322.286	31.006	19315	14293	289.084	1295.8	11.121
s_1_1_NewScaffoldedContig_1315	820	84	36	48	16	12	24	32	337.875	30.71	20	18	8.523	4.608	31.585
s_1_1_NewScaffoldedContig_1316	520	26065	9307	16758	2590	2172	8199	12780	317.751	24.587	8480	6320	3163.23	2182.62	71.346
s_1_1_NewScaffoldedContig_1317	2275	760	352	408	318	88	187	151	418.66	339.962	207	51	27.012	9.355	48.308
s_1_1_NewScaffoldedContig_1318	7567	2053	1151	902	776	168	455	630	966.557	1324.9	456	80	19.309	17.14	35.47
s_1_1_NewScaffoldedContig_1319	31472	7567	3770	3797	4270	1116	400	1663	1353.28	1663.53	1455	240	19.087	12.998	39.737
s_1_1_NewScaffoldedContig_1320	1213	665	338	327	206	66	199	187	331.485	31.149	189	77	43.289	14.589	40.561
s_1_1_NewScaffoldedContig_1321	33081	9533	4738	4795	5454	1218	764	1961	1404.52	1681.89	2258	612	23.2	28.915	42.68
s_1_1_NewScaffoldedContig_1322	3574	855	413	442	360	104	191	185	458.578	426.106	195	64	19.069	10.477	41.718
s_1_1_NewScaffoldedContig_1323	860	27174	13257	13917	2134	5614	445	18809	345.82	39.072	20113	5684	2182.54	1718.91	39.07
s_1_1_NewScaffoldedContig_1324	30051	5935	2924	3011	2664	758	769	1666	1057.7	1451.09	1368	62	15.457	13.426	29.982
s_1_1_NewScaffoldedContig_1325	44504	14067	7052	7015	8442	1912	513	3021	1375.23	1658.99	2896	88	24.681	13.485	41.138
s_1_1_NewScaffoldedContig_1326	21689	3180	1584	1596	1568	532	256	748	998.301	1435.51	854	69	12.511	9.341	30.075
s_1_1_NewScaffoldedContig_1327	5868	669	318	351	176	72	154	257	862.534	1435.56	135	36	8.74	10.724	20.654
s_1_1_NewScaffoldedContig_1328	12251	6457	3151	3306	3212	590	728	1866	1386.19	1583.7	1549	141	35.214	19.889	48.102
s_1_1_NewScaffoldedContig_1329	13851	5201	2619	2582	2970	616	474	1078	1248.35	1551.15	1274	72	28.288	9.006	49.347
s_1_1_NewScaffoldedContig_1330	14658	924	479	445	468	154	59	219	1307.99	1641.66	154	21	5.318	4.916	25.249
s_1_1_NewScaffoldedContig_1331	671	160	88	72	16	16	68	59	345	29.917	21	51	18.955	15.599	33.681
s_1_1_NewScaffoldedContig_1332	7717	2865	1412	1453	1530	364	343	582	967.437	1375.75	750	74	29.685	10.193	46.223
s_1_1_NewScaffoldedContig_1333	1437	96	43	53	54	14	6	19	324.889	31.348	15	15	6.56	2.903	32.707
s_1_1_NewScaffoldedContig_1334	28761	10162	5130	5032	6250	1294	489	1973	1417.13	1688.85	1957	60	27.791	8.947	46.514
s_1_1_NewScaffoldedContig_1335	1725	443	251	192	130	58	114	134	335.938	25.601	60	52	19.638	8.14	43.884
s_1_1_NewScaffoldedContig_1336	15020	2680	1388	1292	1426	460	235	500	1094.38	1511.26	684	103	15.373	8.554	37.284
s_1_1_NewScaffoldedContig_1337	26615	5389	2699	2690	3120	860	327	978	1223.56	1573.85	1115	55	16.916	9.023	36.57
s_1_1_NewScaffoldedContig_1338	3267	691	344	347	300	108	137	123	352.34	192.827	127	44	19.301	7.709	39.027
s_1_1_NewScaffoldedContig_1339	5057	1340	667	673	658	192	199	266	591.474	764.016	257	49	22.211	8.682	41.368
s_1_1_NewScaffoldedContig_1340	1112	257	138	119	84	36	80	54	346.762	36.546	37	36	19.258	7.718	39.928
s_1_1_NewScaffoldedContig_1341	2807	5675	2866	2809	2096	800	1094	1594	420.73	374.762	1612	287	163.324	43.181	40.506
s_1_1_NewScaffoldedContig_1342	30231	9951	4979	4972	5952	1294	445	2112	1309.03	1590.84	1645	109	25.823	9.539	44.663
s_1_1_NewScaffoldedContig_1343	51278	10945	5459	5486	6508	1716	462	2042	1231.17	1589.15	1896	50	17.846	9.27	36.745
s_1_1_NewScaffoldedContig_1344	29971	7992	4011	3981	4744	1014	675	1425	1258.81	1602.61	1468	119	21.643	15.304	40.526
s_1_1_NewScaffoldedContig_1345	43259	14992	7481	7511	9306	1818	492	3141	1441.66	1668.06	2743	72	26.482	11.794	46.094
s_1_1_NewScaffoldedContig_1346	3298	2338	1215	1123	564	422	361	972	690.972	649.662	917	375	43.418	55.619	48.029
s_1_1_NewScaffoldedContig_1347	4279	1416	650	766	642	140	233	385	584.087	602.372	358	60	25.964	9.369	44.473
s_1_1_NewScaffoldedContig_1348	30250	6389	3199	3190	3562	1000	417	1284	1362.42	1711.4	1372	141	17.483	9.885	39.511
s_1_1_NewScaffoldedContig_1349	11864	2444	1208	1236	1292	382	175	540	906.721	1318.35	472	46	17.622	7.828	38.461
s_1_1_NewScaffoldedContig_1350	14334	1168	579	589	410	188	205	346	832.585	1240.12	372	196	6.824	13.813	16.597
s_1_1_NewScaffoldedContig_1351	13631	1216	604	612	568	214	165	247	1061.78	1534.72	236	35	7.58	7.454	23.094
s_1_1_NewScaffoldedContig_1352	6810	1372	686	686	608	180	205	356	815.938	1132.19	315	74	16.721	10.129	36.153
s_1_1_NewScaffoldedContig_1353	15248	2094	1058	1036	1060	406	184	399	1025.36	1397.38	397	46	11.878	7.942	30.535
s_1_1_NewScaffoldedContig_1354	51476	8186	4084	4102	4598	1334	448	1629	1386.68	1724.71	1424	115	13.481	9.257	31.704
s_1_1_NewScaffoldedContig_1355	29770	9308	4633	4675	5780	1280	341	1760	1364.89	1656.41	1692	59	25.032	10.927	44.525
s_1_1_NewScaffoldedContig_1356	15319	738	365	373	256	96	117	245	857.289	1304.93	182	36	3.991	5.003	18.128
s_1_1_NewScaffoldedContig_1357	1308	254	142	112	66	44	64	71	344.061	25.391	52	36	16.563	7.169	36.468
s_1_1_NewScaffoldedContig_1358	20447	3248	1636	1612	1714	564	220	674	1294.62	1644.11	613	44	13.361	9.148	31.692
s_1_1_NewScaffoldedContig_1359	6755	797	399	398	392	112	114	161	690.612	1088.34	150	41	9.679	10.091	23.153
s_1_1_NewScaffoldedContig_1360	677	180	75	105	40	18	79	41	343.4	28.262	24	31	18.16	7.036	62.629
s_1_1_NewScaffoldedContig_1361	18134	3578	1801	1777	1570	462	626	882	1062.64	1472.77	497	48	14.245	9.71	40.057
s_1_1_NewScaffoldedContig_1362	22673	6707	2080	4627	2104	644	797	1551	1241.55	1592.39	1232	2999	17.508	99.816	33.374
s_1_1_NewScaffoldedContig_1363	2776	136	63	73	36	32	19	47	608.722	598.689	13	20	3.767	4.398	20.065
s_1_1_NewScaffoldedContig_1364	759	66	40	26	18	10	12	25	343.111	26.531	11	14	7.054	2.6	35.573
s_1_1_NewScaffoldedContig_1365	24257	5788	2926	2862	3480	1004	207	1007	1267.77	1652.58	1393	55	20.02	8.79	39.572
s_1_1_NewScaffoldedContig_1366	17071	3377	1717	1660	1728	580	335	684	928.966	1347.67	622	53	16.66	9.169	37.391
s_1_1_NewScaffoldedContig_1367	46421	8822	4412	4410	5024	1510	320	1805	1299.74	1647.51	1667	50	15.882	8.303	35.518
s_1_1_NewScaffoldedContig_1368	3924	1814	906	908	736	198	485	380	581.783	595.602	457	61	33.646	9.697	51.223
s_1_1_NewScaffoldedContig_1369	3570	1713	860	853	662	124	474	429	624.106	627.11	479	70	33.573	12.514	53.501
s_1_1_NewScaffoldedContig_1370	43430	10654	5297	5357	6164	1592	666	2073	1363.57	1699.72	2165	70	19.873	10.974	37.615
s_1_1_NewScaffoldedContig_1371	17128	3369	1685	1684	1830	486	219	791	1170.35	1545.6	566	46	15.523	11.958	32.485
s_1_1_NewScaffoldedContig_1372	1929	273	129	144	148	32	33	58	332.446	27.676	46	21	12.635	4.548	44.997
s_1_1_NewScaffoldedContig_1373	32466	5597	2823	2774	2916	914	477	1172	1056.15	1478.15	1218	42	14.408	9.133	33.047
s_1_1_NewScaffoldedContig_1374	1293	13961	6343	7618	2546	1214	3755	6322	330.146	29.26	7873	1603	817.517	521.499	41.222
s_1_1_NewScaffoldedContig_1375	985	11675	5924	5751	3876	1072	2862	3719	332.911	27.779	6546	1583	945.501	385.043	47.005
s_1_1_NewScaffoldedContig_1376	23147	3081	1499	1582	1546	602	220	649	1196.13	1634.59	530	40	11.322	8.103	29.861
s_1_1_NewScaffoldedContig_1377	657	72	39	33	16	10	23	21	346.625	38.242	12	20	9.962	5.92	35.616
s_1_1_NewScaffoldedContig_1378	2411	333	157	176	180	20	48	77	347.7	175.366	67	23	11.354	4.734	48.984
s_1_1_NewScaffoldedContig_1379	9370	2225	1095	1130	1272	212	216	495	1367.46	1573.13	371	48	18.006	8.193	46.243
s_1_1_NewScaffoldedContig_1380	24217	12264	6177	6087	7420	1224	651	2834	1695.92	1741.93	2344	86	35.283	13.126	54.036
s_1_1_NewScaffoldedContig_1381	24397	5185	2623	2562	2766	716	506	1121	1322.34	1656.91	1047	82	16.999	11.249	33.197
s_1_1_NewScaffoldedContig_1382	15412	1349	684	665	574	228	269	252	716.61	1097.05	312	37	7.508	9.696	18.077
s_1_1_NewScaffoldedContig_1383	21688	4646	2281	2365	2692	896	188	782	1176.83	1521.57	725	46	18.303	7.46	39.695
s_1_1_NewScaffoldedContig_1384	17790	5750	2919	2831	3162	698	456	1384	1257.66	1573.41	978	67	24.744	12.446	43.682
s_1_1_NewScaffoldedContig_1385	1342	1004	506	498	148	50	325	477	338.324	28.492	456	381	41.919	59.251	64.903
s_1_1_NewScaffoldedContig_1386	15395	2801	1388	1413	1560	430	185	577	1247.7	1650.1	453	46	15.022	10.664	31.848
s_1_1_NewScaffoldedContig_1387	42739	5759	2890	2869	2826	980	549	1261	1027.27	1447.4	855	43	11.666	8.833	28.321
s_1_1_NewScaffoldedContig_1388	4407	1747	909	838	780	144	341	465	669.228	711.049	325	55	29.133	8.604	50.987
s_1_1_NewScaffoldedContig_1389	2481	1220	654	566	492	106	285	317	457.846	438.44	337	61	36.437	8.692	55.623
s_1_1_NewScaffoldedContig_1390	33725	6102	3050	3052	2842	1016	666	1467	1160.23	1585.37	1681	626	15.404	29.847	32.827
s_1_1_NewScaffoldedContig_1391	37511	18972	9748	9224	10546	1672	1632	4922	1557.27	1706.36	4036	1009	34.983	37.367	47.965
s_1_1_NewScaffoldedContig_1392	5027	2717	1275	1442	74	90	1144	1387	343.676	31.174	2442	539	37.872	90.735	14.422
s_1_1_NewScaffoldedContig_1393	7081	3014	1409	1605	652	246	1182	889	852.307	1249.97	1817	1057	34.44	101.234	37.848
s_1_1_NewScaffoldedContig_1394	3206	642	315	327	274	116	119	125	478.577	476.386	181	32	16.906	5.902	39.551
s_1_1_NewScaffoldedContig_1395	42044	7142	3551	3591	3746	1320	550	1408	1083.22	1470.77	1232	145	14.346	10.399	31.95
s_1_1_NewScaffoldedContig_1396	4581	2138	1017	1121	992	224	452	450	574.099	603.959	546	64	35.617	12.429	48.657
s_1_1_NewScaffoldedContig_1397	2164	302	150	152	170	20	28	83	381.576	241.115	65	25	11.827	3.8	50.323
s_1_1_NewScaffoldedContig_1398	11555	1920	935	985	942	456	88	378	940.042	1328.5	320	47	14.747	8.238	33.094
s_1_1_NewScaffoldedContig_1399	26034	5597	2801	2796	3282	754	461	1017	1356.4	1687.35	887	54	17.33	12.022	34.589
s_1_1_NewScaffoldedContig_1400	71368	14130	6925	7205	8488	2174	635	2586	1318.34	1650.93	2351	66	16.321	10.669	35.404
s_1_1_NewScaffoldedContig_1401	34310	14215	7119	7096	6586	1274	2661	3542	1239.49	1553.43	5138	1318	32.28	75.37	42.27
s_1_1_NewScaffoldedContig_1402	27207	5416	2771	2645	2890	910	374	1140	1185.45	1557.55	1169	45	16.593	9.536	35.318
s_1_1_NewScaffoldedContig_1403	32025	5343	2680	2663	2852	892	392	1099	1208.88	1606.2	1150	216	13.806	12.11	30.635
s_1_1_NewScaffoldedContig_1404	33076	6790	3428	3362	3876	1056	321	1408	1182.28	1570.41	1140	50	17.085	9.986	35.497
s_1_1_NewScaffoldedContig_1405	41854	7219	3623	3596	3856	1330	431	1485	1052.15	1448.13	1605	53	14.528	10.697	31.084
s_1_1_NewScaffoldedContig_1406	1816	387	187	200	132	58	137	55	329.515	26.497	90	37	16.984	7.335	38.822
s_1_1_NewScaffoldedContig_1407	616	13412	7064	6348	2	574	2622	10096	385	0	7825	4289	1439.7	1405.28	38.474
s_1_1_NewScaffoldedContig_1408	11134	4233	2181	2052	2298	488	370	1023	1083.65	1387.32	941	69	28.724	10.129	49.641
s_1_1_NewScaffoldedContig_1409	12783	2960	1478	1482	1264	412	409	831	973.253	1372.97	657	106	17.587	12.884	34.272
s_1_1_NewScaffoldedContig_1410	4508	973	496	477	454	164	167	169	527.427	519.588	214	41	18.147	8.71	43.5
s_1_1_NewScaffoldedContig_1411	3986	983	505	478	428	128	233	181	503.981	531.669	171	48	19.85	7.589	40.718
s_1_1_NewScaffoldedContig_1412	16988	2960	1471	1489	1496	630	152	603	1079.83	1537.8	656	41	15.108	7.435	35.855
s_1_1_NewScaffoldedContig_1413	76217	26003	12935	13068	16064	3156	779	5645	1571.52	1770.9	5207	82	26.078	13.505	43.601
s_1_1_NewScaffoldedContig_1414	21935	9506	4841	4665	5732	1064	515	2084	1544.89	1704.59	1990	131	31.863	12.014	50.686
s_1_1_NewScaffoldedContig_1415	120347	26153	13075	13078	15524	4216	1106	4849	1411.12	1718.28	4207	486	17.931	13.683	38.488
s_1_1_NewScaffoldedContig_1416	22111	2880	1453	1427	1432	470	222	711	1133.86	1615.28	490	38	10.871	7.738	28.836
s_1_1_NewScaffoldedContig_1417	2082	309	183	126	96	40	74	90	375.292	211.856	53	29	12.188	6.209	33.67
s_1_1_NewScaffoldedContig_1418	3250	912	507	405	160	96	304	337	383.662	282.295	446	273	20.934	34.571	35.138
s_1_1_NewScaffoldedContig_1419	1023	55	31	24	20	2	15	17	329	30.063	6	14	4.404	2.746	32.356
s_1_1_NewScaffoldedContig_1420	4014	127488	68201	59287	744	638	74692	50962	618.581	652.306	92355	112235	2152.04	13028.2	50.847
s_1_1_NewScaffoldedContig_1421	13956	4704	2367	2337	2470	568	516	1094	1194.25	1522.32	1181	59	25.897	11.444	44.218
s_1_1_NewScaffoldedContig_1422	10629	2754	1312	1442	858	384	758	720	409.678	348.876	1474	119	21.354	23.025	28.102
s_1_1_NewScaffoldedContig_1423	17151	2398	1200	1198	970	432	417	529	716.93	1099.16	636	85	11.958	11.607	27.474
s_1_1_NewScaffoldedContig_1424	703	709	356	353	160	92	251	195	337.45	22.801	600	170	87.132	40.593	41.11
s_1_1_NewScaffoldedContig_1425	27519	11136	5474	5662	6366	1004	780	2864	1415.07	1613.61	2661	80	28.596	18.03	43.574
s_1_1_NewScaffoldedContig_1426	61561	30726	15455	15271	19732	3328	614	6690	1662.31	1729.25	4797	163	35.446	15.352	50.998
s_1_1_NewScaffoldedContig_1427	27581	3315	1673	1642	1730	540	233	760	1043.8	1452.72	459	41	9.72	6.863	36.478
s_1_1_NewScaffoldedContig_1428	4045	1924	962	962	712	156	443	595	618.303	627.729	482	73	31.623	13.85	60.074
s_1_1_NewScaffoldedContig_1429	35818	13983	6912	7071	7560	1586	992	3672	1361.92	1574.34	3291	85	27.64	18.033	44.391
s_1_1_NewScaffoldedContig_1430	5308	1538	828	710	448	84	437	545	874.036	1016.95	351	70	16.489	15.467	45.29
s_1_1_NewScaffoldedContig_1431	52086	8622	4308	4314	4654	1496	554	1752	1128.02	1546.32	1607	55	13.991	10.243	30.315
s_1_1_NewScaffoldedContig_1432	1717	5661	3114	2547	562	186	1158	3705	347.036	32.196	3577	1456	204.595	296.436	50.612
s_1_1_NewScaffoldedContig_1433	8454	4501	2223	2278	2502	418	624	917	1223.9	1506.97	963	71	38.548	12.303	52.638
s_1_1_NewScaffoldedContig_1434	15198	3273	1659	1614	1854	516	229	613	1123.22	1528.79	526	44	18.098	6.933	38.972
s_1_1_NewScaffoldedContig_1435	18266	4728	2410	2318	2690	684	266	997	1295.74	1628.74	817	59	21.183	9.74	40.89
s_1_1_NewScaffoldedContig_1436	4778	1699	836	863	814	200	315	355	620.28	733.816	418	52	27.439	8.038	45.5
s_1_1_NewScaffoldedContig_1437	5350	1659	831	828	784	230	279	344	691.492	887.422	377	50	24.871	7.981	44.243
s_1_1_NewScaffoldedContig_1438	67134	17898	8942	8956	10468	2590	844	3726	1447.09	1731.3	3223	122	20.989	11.508	40.144
s_1_1_NewScaffoldedContig_1439	17396	4592	2270	2322	2780	640	339	766	1105.58	1480.36	833	52	21.882	8.704	42.814
s_1_1_NewScaffoldedContig_1440	54347	11599	5764	5835	6746	1812	486	2346	1402.95	1685.72	1840	56	17.339	8.847	38.659
s_1_1_NewScaffoldedContig_1441	5266	2197	1025	1172	604	314	164	1087	477.864	625.838	750	210	30.154	36.276	41.455
s_1_1_NewScaffoldedContig_1442	14197	2397	1200	1197	1144	362	284	566	1190.3	1606.42	406	54	13.698	9.908	32.81
s_1_1_NewScaffoldedContig_1443	42797	5280	2655	2625	2606	778	574	1232	1132.77	1555.56	1105	128	10.134	10.078	24.731
s_1_1_NewScaffoldedContig_1444	902	10408	5331	5077	996	302	3296	5742	345.044	30.866	8022	1874	809.258	627.056	47.339
s_1_1_NewScaffoldedContig_1445	96914	21584	10752	10832	13190	3400	768	3849	1381.77	1698.71	3542	55	18.513	8.636	39.545
s_1_1_NewScaffoldedContig_1446	1727	771	414	357	206	54	209	295	362.505	184.672	288	83	31.812	12.433	51.071
s_1_1_NewScaffoldedContig_1447	25254	8501	4265	4236	5216	1152	394	1614	1497.36	1726.32	1857	68	26.695	10.359	45.157
s_1_1_NewScaffoldedContig_1448	40844	6741	3361	3380	3800	902	333	1621	1469.45	1710.71	907	40	12.664	7.031	42.048
s_1_1_NewScaffoldedContig_1449	5966	1756	908	848	860	260	258	355	664.428	946.381	364	52	23.986	9.365	43.781
s_1_1_NewScaffoldedContig_1450	3554	358	183	175	216	22	43	69	413.435	329.118	72	23	9.355	4.114	41.024
s_1_1_NewScaffoldedContig_1451	19705	4265	2218	2047	2122	590	509	972	1191.86	1572.88	1112	531	17.147	26.021	33.524
s_1_1_NewScaffoldedContig_1452	41661	10166	5133	5033	6074	1390	523	2037	1366.41	1644.74	1764	65	19.34	11.034	38.768
s_1_1_NewScaffoldedContig_1453	13822	2398	1228	1170	1228	354	289	471	1039.32	1461.06	529	273	14.554	15.832	34.279
s_1_1_NewScaffoldedContig_1454	24560	5214	2680	2534	2870	848	315	1090	1066.41	1413.51	791	55	17.413	9.659	39.039
s_1_1_NewScaffoldedContig_1455	60498	17321	8652	8669	10800	2434	417	3415	1413.87	1698.8	3647	60	23.067	9.072	43.345
s_1_1_NewScaffoldedContig_1456	9182	2276	1179	1097	1186	308	198	554	1016.39	1347.59	409	52	19.954	12.102	38.412
s_1_1_NewScaffoldedContig_1457	14842	1820	875	945	928	330	193	329	845.373	1309.8	532	29	10.81	7.821	28.958
s_1_1_NewScaffoldedContig_1458	1136	64532	33722	30810	11534	2982	17135	32267	334.223	26.953	25614	10822	3861.92	2091.86	53.345
s_1_1_NewScaffoldedContig_1459	20829	3784	1907	1877	2146	594	254	705	1208.83	1591.07	961	91	15.316	7.604	38.672
s_1_1_NewScaffoldedContig_1460	43523	4502	2280	2222	2294	852	364	856	1218.87	1647.1	694	45	9.102	8.267	23.728
s_1_1_NewScaffoldedContig_1461	6288	1657	786	871	728	252	242	407	801.731	1137.93	322	50	21.231	8.14	40.999
s_1_1_NewScaffoldedContig_1462	8949	2057	1039	1018	970	314	246	485	1102.11	1442.6	355	50	18.704	7.057	40.708
s_1_1_NewScaffoldedContig_1463	32078	4349	2181	2168	2124	788	405	939	1163.38	1588.87	882	54	11.497	7.637	31.043
s_1_1_NewScaffoldedContig_1464	17169	7553	3894	3659	4558	888	353	1656	1492.48	1686.14	1339	67	32.472	11.253	50.457
s_1_1_NewScaffoldedContig_1465	1872	966	474	492	208	108	300	340	332.058	27.226	169	63	32.201	13	60.684
s_1_1_NewScaffoldedContig_1466	22071	4095	2046	2049	2210	604	355	852	1139.02	1521.45	743	53	15.487	10.096	33.623
s_1_1_NewScaffoldedContig_1467	31637	7894	3920	3974	4648	1144	333	1642	1388.81	1674.28	1551	58	20.081	10.112	41.082
s_1_1_NewScaffoldedContig_1468	24968	6732	3316	3416	3418	746	903	1578	1243.67	1557.54	1216	71	19.882	17.225	33.703
s_1_1_NewScaffoldedContig_1469	10899	4297	2156	2141	2432	504	412	884	1243.63	1463.47	761	65	29.682	9.91	51.142
s_1_1_NewScaffoldedContig_1470	14005	1287	684	603	540	222	189	293	1005.96	1486.6	201	42	7.746	8.821	18.722
s_1_1_NewScaffoldedContig_1471	33550	6029	3007	3022	3340	998	319	1280	1169.69	1530.15	1123	47	14.826	9.612	33.288
s_1_1_NewScaffoldedContig_1472	12944	5456	2765	2691	2828	548	522	1502	1386.66	1642.56	1362	142	29.66	15.658	48.463
s_1_1_NewScaffoldedContig_1473	11901	6418	3127	3291	3812	624	371	1531	1509.98	1584.79	1358	102	36.371	14.745	59.054
s_1_1_NewScaffoldedContig_1474	3069	835	466	369	292	108	203	213	434.788	399.014	249	50	21.171	7.546	40.241
s_1_1_NewScaffoldedContig_1475	2689	673	330	343	178	78	195	208	337.056	26.603	227	131	19.595	15.364	39.606
s_1_1_NewScaffoldedContig_1476	520	247	119	128	46	20	81	96	331.217	36.277	64	61	34.704	12.533	49.808
s_1_1_NewScaffoldedContig_1477	84115	12600	6285	6315	6724	2172	779	2694	1268.79	1638.97	1924	62	12.47	9.734	29.599
s_1_1_NewScaffoldedContig_1478	12326	2643	1255	1388	1298	452	327	508	736.678	1067.49	461	51	18.118	8.359	38.098
s_1_1_NewScaffoldedContig_1479	12104	2265	1152	1113	1106	434	198	480	1196.69	1601.3	425	66	16	8.355	36.839
s_1_1_NewScaffoldedContig_1480	24238	4798	2398	2400	2610	814	187	1092	1356.63	1674.78	909	49	16.337	8.878	36.36
s_1_1_NewScaffoldedContig_1481	18426	2889	1429	1460	1580	506	228	518	1258.06	1661.95	537	58	13.224	8.133	32.622
s_1_1_NewScaffoldedContig_1482	7586	1747	852	895	902	212	248	362	1028.65	1458.07	421	50	18.348	12.862	35.183
s_1_1_NewScaffoldedContig_1483	564	1661	1007	654	44	30	817	758	375.955	50.297	807	735	166.174	192.569	59.752
s_1_1_NewScaffoldedContig_1484	3237	46174	22431	23743	12666	6582	10155	16306	331.217	31.803	18232	1975	951.508	673.656	51.035
s_1_1_NewScaffoldedContig_1485	8141	1640	823	817	892	254	212	249	1001.07	1394	247	44	16.863	8.198	39.639
s_1_1_NewScaffoldedContig_1486	13799	2857	1402	1455	1584	434	216	573	1110.02	1518.08	451	45	17.111	8.941	38.068
s_1_1_NewScaffoldedContig_1487	18107	5590	2711	2879	3360	806	312	1029	1301.48	1652.11	1326	69	24.877	8.6	44.309
s_1_1_NewScaffoldedContig_1488	13802	2027	1045	982	936	304	329	416	813.729	1151.86	337	54	12.11	10.397	27.177
s_1_1_NewScaffoldedContig_1489	1786	365	184	181	106	74	75	101	333.604	30.071	68	37	17.676	6.309	37.234
s_1_1_NewScaffoldedContig_1490	3038	492	253	239	190	76	90	119	470.095	477.939	97	38	14.218	6.387	36.603
s_1_1_NewScaffoldedContig_1491	5116	1432	671	761	706	212	182	316	573.513	614.644	349	54	22.831	11.091	42.611
s_1_1_NewScaffoldedContig_1492	911	1051	497	554	126	76	429	406	342.159	33.899	595	286	70.954	62.017	59.824
s_1_1_NewScaffoldedContig_1493	20576	3930	1960	1970	2184	580	368	716	1140.44	1528.41	798	46	15.938	9.262	35.055
s_1_1_NewScaffoldedContig_1494	42365	10049	4993	5056	5910	1424	532	2045	1228.39	1565.86	2042	54	19.408	10.332	37.953
s_1_1_NewScaffoldedContig_1495	3148	833	417	416	386	134	148	152	449.057	418.614	199	48	21.618	10.232	42.567
s_1_1_NewScaffoldedContig_1496	23774	4848	2411	2437	2752	754	291	976	1102.07	1465.55	794	58	16.708	10.356	37.562
s_1_1_NewScaffoldedContig_1497	69195	22789	11381	11408	13832	2810	1085	4795	1437.37	1701.87	4501	66	25.396	12.558	41.481
s_1_1_NewScaffoldedContig_1498	15419	5911	2951	2960	3442	706	415	1290	1342.02	1600.91	1286	66	29.182	12.661	46.423
s_1_1_NewScaffoldedContig_1499	6203	2331	1123	1208	1176	282	360	467	879.412	1164.16	655	70	29.642	10.575	47.88
s_1_1_NewScaffoldedContig_1500	27208	8858	4403	4455	5528	1026	415	1759	1348.8	1601.18	2098	150	25.414	11.091	46.229
s_1_1_NewScaffoldedContig_1501	3457	434	200	234	184	86	61	89	418.761	383.732	71	25	11.34	5.046	35.435
s_1_1_NewScaffoldedContig_1502	15045	1704	828	876	778	308	146	436	837.586	1283.62	296	37	9.799	7.83	26.461
s_1_1_NewScaffoldedContig_1503	2873	5121	2603	2518	52	60	1659	3283	341.115	30.422	3684	1529	92.19	250.638	28.333
s_1_1_NewScaffoldedContig_1504	9084	944	469	475	394	134	141	255	894.061	1321.84	210	31	8.639	8.572	22.105
s_1_1_NewScaffoldedContig_1505	2384	262	129	133	138	18	52	52	368.174	254.41	37	22	9.649	4.124	40.982
s_1_1_NewScaffoldedContig_1506	3228	302	147	155	82	32	82	99	329.22	23.478	95	33	7.416	8.011	25.062
s_1_1_NewScaffoldedContig_1507	1137	1335	756	579	52	14	644	614	326.808	30.96	1135	418	80.02	99.495	40.897
s_1_1_NewScaffoldedContig_1508	4211	401	222	179	222	32	42	91	529.64	563.921	70	25	8.679	4.05	39.159
s_1_1_NewScaffoldedContig_1509	58242	12338	6098	6240	6976	1910	884	2349	1291.87	1667.77	2193	83	17.432	11.672	34.449
s_1_1_NewScaffoldedContig_1510	26763	6526	3249	3277	3722	930	446	1328	1390.84	1728.67	1230	179	19.792	11.962	39.267
s_1_1_NewScaffoldedContig_1511	10420	1163	605	558	300	190	309	333	617.593	792.105	373	169	9.119	14.056	22.111
s_1_1_NewScaffoldedContig_1512	58026	9741	4852	4889	5736	1678	391	1770	1231.87	1594.5	1550	50	14.105	9.025	32.921
s_1_1_NewScaffoldedContig_1513	13088	1091	556	535	492	180	92	308	999.764	1479.15	262	30	6.935	6.722	26.696
s_1_1_NewScaffoldedContig_1514	18763	5471	2754	2717	3294	646	419	1037	1232.13	1568.43	1105	51	23.475	10.328	40.921
s_1_1_NewScaffoldedContig_1515	6443	712	360	352	288	76	132	210	1279.55	1745.01	103	29	8.313	6.394	33.649
s_1_1_NewScaffoldedContig_1516	39412	13806	6726	7080	4188	1186	4330	3967	1233.6	1599.98	7361	5730	31.063	260.484	35.563
s_1_1_NewScaffoldedContig_1517	39368	11803	5982	5821	7046	1564	603	2424	1443.46	1711.74	2596	396	23.609	15.762	41.811
s_1_1_NewScaffoldedContig_1518	17564	7706	3845	3861	4614	778	494	1732	1468.61	1661.65	1652	70	32.282	11.399	51.816
s_1_1_NewScaffoldedContig_1519	92132	15036	7516	7520	8566	2554	796	2832	1321.37	1688.91	2412	89	13.72	9.05	32.334
s_1_1_NewScaffoldedContig_1520	38870	7657	3831	3826	4508	1206	431	1374	1196.7	1550.29	1355	62	16.45	10.52	34.322
s_1_1_NewScaffoldedContig_1521	28786	4405	2175	2230	2276	710	458	867	1042.5	1461.36	675	44	12.956	10.067	28.865
s_1_1_NewScaffoldedContig_1522	2683	1095	552	543	440	108	193	334	436.159	382.488	369	78	30.809	14.354	51.994
s_1_1_NewScaffoldedContig_1523	5349	3193	1478	1715	1432	244	494	994	926.862	1014.41	647	125	40.426	23.221	57.936
s_1_1_NewScaffoldedContig_1524	76402	18656	9319	9337	11846	2650	517	3378	1433.22	1719.03	3610	92	19.775	10.155	39.365
s_1_1_NewScaffoldedContig_1525	9309	2452	1228	1224	668	224	685	841	568.296	709.194	1182	716	21.572	62.833	25.782
s_1_1_NewScaffoldedContig_1526	6088	745	373	372	278	110	102	246	1001.73	1594.83	233	38	9.962	10.839	22.996
s_1_1_NewScaffoldedContig_1527	5163	1141	570	571	544	208	168	197	639.875	867.627	248	44	18.79	7.246	39.144
s_1_1_NewScaffoldedContig_1528	12390	3228	1594	1634	1778	464	259	661	1139.25	1509.66	611	50	21.549	7.861	41.017
s_1_1_NewScaffoldedContig_1529	480	78	46	32	22	12	28	14	343.273	30.834	15	23	12.994	5.192	38.333
s_1_1_NewScaffoldedContig_1530	29677	4576	2340	2236	2652	816	174	825	1252.54	1661.81	724	53	13.453	7.781	33.339
s_1_1_NewScaffoldedContig_1531	20681	5153	2527	2626	3004	756	344	971	1402.22	1708.53	978	57	19.983	11.968	35.661
s_1_1_NewScaffoldedContig_1532	137548	37112	18455	18657	23578	5056	835	7036	1418.37	1701.4	7115	66	21.888	10.467	41.225
s_1_1_NewScaffoldedContig_1533	10116	1879	970	909	830	310	269	432	887.554	1257.07	327	41	15.307	8.248	35.676
s_1_1_NewScaffoldedContig_1534	7294	1827	935	892	896	274	189	433	903.444	1291.66	413	46	20.576	7.675	42.597
s_1_1_NewScaffoldedContig_1535	29888	4514	2222	2292	2182	702	553	986	867.749	1253.95	1217	123	12.673	11.409	29.082
s_1_1_NewScaffoldedContig_1536	82484	20998	10516	10482	13006	3142	691	3833	1412.66	1709.05	3255	52	20.651	9.738	40.684
s_1_1_NewScaffoldedContig_1537	6768	327	170	157	98	54	62	101	780.918	1335.21	62	30	3.894	6.425	12.5
s_1_1_NewScaffoldedContig_1538	20945	5421	2668	2753	3062	838	307	1128	1232.59	1628.07	1015	50	21.396	9.038	41.275
s_1_1_NewScaffoldedContig_1539	26430	4587	2248	2339	2228	696	441	1122	888.499	1231.2	861	52	14.066	10.333	34.162
s_1_1_NewScaffoldedContig_1540	27558	6639	3356	3283	4066	982	299	1177	1406.04	1710.36	1434	55	19.939	8.108	42.031
s_1_1_NewScaffoldedContig_1541	1990	221	92	129	122	6	47	42	345.344	170.285	50	20	10.251	3.857	42.06
s_1_1_NewScaffoldedContig_1542	39409	10511	5223	5288	6448	1566	320	2006	1349.32	1668.54	2311	62	21.749	10.829	41.359
s_1_1_NewScaffoldedContig_1543	15742	5317	2655	2662	2790	738	549	1171	1238.53	1544.29	1104	80	25.955	10.131	46.119
s_1_1_NewScaffoldedContig_1544	24305	8438	4173	4265	4438	954	936	1986	1439.84	1728.01	1965	419	26.746	22.436	41.485
s_1_1_NewScaffoldedContig_1545	71146	23862	12038	11824	14694	3172	949	4734	1478.17	1732.3	3890	375	26.378	14.364	45.183
s_1_1_NewScaffoldedContig_1546	29888	5638	2802	2836	2956	972	529	1087	1117.78	1508.62	1272	153	15.696	9.897	34.793
s_1_1_NewScaffoldedContig_1547	112362	36602	18247	18355	23288	4888	834	7109	1522.82	1757.35	7057	71	25.446	10.899	44.403
s_1_1_NewScaffoldedContig_1548	47035	10872	5420	5452	6738	1612	372	1987	1474.59	1755.17	1850	54	18.77	9.519	38.95
s_1_1_NewScaffoldedContig_1549	41840	6513	3237	3276	3560	1140	286	1386	1318.53	1666.01	1023	53	13.178	9.159	31.2
s_1_1_NewScaffoldedContig_1550	13291	3787	1863	1924	2344	554	186	651	1223.73	1525.13	593	58	23.119	10.053	43.292
s_1_1_NewScaffoldedContig_1551	7713	1473	747	726	676	256	198	319	1107.42	1474.56	286	37	15.789	7.728	36.691
s_1_1_NewScaffoldedContig_1552	5115	800	406	394	324	126	129	208	506.821	557.64	192	48	12.741	9.996	30.968
s_1_1_NewScaffoldedContig_1553	66438	28091	14147	13944	17552	2980	1170	6064	1567.11	1723.26	6070	309	31.388	14.911	47.271
s_1_1_NewScaffoldedContig_1554	30478	14196	7024	7172	8176	1348	907	3614	1611.6	1722.04	3909	996	34.804	51.314	50.879
s_1_1_NewScaffoldedContig_1555	5708	2048	1020	1028	832	320	267	595	648.834	838.982	592	76	29.047	13.172	42.87
s_1_1_NewScaffoldedContig_1556	41889	9237	4670	4567	5312	1256	720	1811	1299.32	1632.26	1499	69	17.584	12.068	35.155
s_1_1_NewScaffoldedContig_1557	12290	3786	1934	1852	2216	642	209	660	1140.97	1568.24	869	55	25.768	8.603	43.735
s_1_1_NewScaffoldedContig_1558	5975	2111	1069	1042	948	266	352	522	770.354	1003.03	501	65	27.178	10.402	44.301
s_1_1_NewScaffoldedContig_1559	30233	4988	2506	2482	2412	804	491	1185	1322.59	1715.48	1212	192	13.739	13.402	30.976
s_1_1_NewScaffoldedContig_1560	47543	19334	9502	9832	12300	2062	545	4189	1577.24	1705.57	3469	81	29.237	13.133	49.995
s_1_1_NewScaffoldedContig_1561	549	466	207	259	38	50	177	191	331.211	24.278	197	94	50.74	14.8	57.559
s_1_1_NewScaffoldedContig_1562	5165	144	78	66	10	16	39	76	324.8	9.174	74	40	1.856	5.429	6.834
s_1_1_NewScaffoldedContig_1563	22839	3984	2019	1965	740	322	1234	1650	762.735	1178.44	2589	1276	14.863	81.566	24.257
s_1_1_NewScaffoldedContig_1564	27172	14334	7154	7180	9078	1370	681	3047	1621.62	1709.35	3089	77	37.14	11.16	52.727
s_1_1_NewScaffoldedContig_1565	11194	2103	1098	1005	1040	382	123	510	908.204	1334.46	496	41	16.143	6.986	38.003
s_1_1_NewScaffoldedContig_1566	575	198	107	91	36	8	61	93	336.444	21.36	23	58	23.616	15.89	47.652
s_1_1_NewScaffoldedContig_1567	29721	6826	3373	3453	3346	860	757	1795	1164.97	1575.52	1182	52	17.79	13.197	34.174
s_1_1_NewScaffoldedContig_1568	1136	427	204	223	114	54	153	102	329.807	32.404	64	52	28.05	8.992	46.831
s_1_1_NewScaffoldedContig_1569	18716	7751	3832	3919	4790	858	415	1589	1597.09	1712.95	1111	69	30.464	10.905	47.617
s_1_1_NewScaffoldedContig_1570	10869	3097	1447	1650	1342	468	377	873	1190.67	1498.49	806	238	21.692	21.795	34.005
s_1_1_NewScaffoldedContig_1571	12090	2205	1138	1067	1088	422	181	474	1226.54	1747.53	450	50	15.072	9.901	34.326
s_1_1_NewScaffoldedContig_1572	715	49	26	23	10	8	10	21	346.4	32.457	5	15	5.014	3.473	28.951
s_1_1_NewScaffoldedContig_1573	13615	4341	2169	2172	2226	414	441	1212	1229.66	1483.19	883	80	23.051	15.724	41.799
s_1_1_NewScaffoldedContig_1574	39912	4704	2370	2334	2388	846	390	982	1035.56	1501.88	1160	56	10.221	8.866	26.055
s_1_1_NewScaffoldedContig_1575	19581	4890	2505	2385	2620	668	575	929	1004.03	1395.59	1070	103	20.517	12.125	36.862
s_1_1_NewScaffoldedContig_1576	25984	5179	2480	2699	2848	730	323	1192	1265.87	1657.85	932	53	16.166	11.333	33.586
s_1_1_NewScaffoldedContig_1577	12964	1743	871	872	640	286	154	590	1018.67	1385.17	357	50	9.842	9.246	35.938
s_1_1_NewScaffoldedContig_1578	30412	6080	3029	3051	3632	1026	215	1091	1256.87	1631.02	1230	54	16.812	7.92	37.89
s_1_1_NewScaffoldedContig_1579	15057	2704	1374	1330	1380	448	264	563	1080.31	1485.48	585	45	14.71	9.304	31.912
s_1_1_NewScaffoldedContig_1580	5025	572	278	294	224	124	104	98	770.679	1196.69	87	34	10.406	9.104	24.816
s_1_1_NewScaffoldedContig_1581	5879	1281	606	675	656	206	129	265	644.994	879.949	285	38	18.793	6.573	40.381
s_1_1_NewScaffoldedContig_1582	7631	2310	1233	1077	1252	316	226	475	910.96	1250.98	507	61	24.679	8.935	42.485
s_1_1_NewScaffoldedContig_1583	71601	10491	5230	5261	4738	1584	1275	2684	1222.1	1630.17	2791	700	11.772	24.097	27.114
s_1_1_NewScaffoldedContig_1584	2421	27318	12074	15244	1422	1030	8338	16337	318.079	25.136	11660	4438	700.792	1283.19	18.959
s_1_1_NewScaffoldedContig_1585	8120	2049	1033	1016	388	190	742	698	684.608	1040.91	1172	414	19.9	44.227	29.815
s_1_1_NewScaffoldedContig_1586	33240	8180	4105	4075	4918	1284	348	1466	1338.51	1678.51	1449	68	20.528	9.135	41.444
s_1_1_NewScaffoldedContig_1587	5845	1658	851	807	840	230	234	319	800.757	1130.58	361	46	23.645	8.995	44.311
s_1_1_NewScaffoldedContig_1588	15403	6416	3086	3330	3142	522	696	1971	1282.4	1516.96	1433	79	26.979	21.049	45.017
s_1_1_NewScaffoldedContig_1589	7912	1414	694	720	700	240	151	292	1052.35	1466.02	309	34	14.937	6.673	36.097
s_1_1_NewScaffoldedContig_1590	2343	42	20	22	10	8	10	14	1619	641.52	6	13	1.338	2.661	9.945
s_1_1_NewScaffoldedContig_1591	4003	1216	635	581	574	144	196	281	492.038	503.61	223	55	24.706	8.286	44.517
s_1_1_NewScaffoldedContig_1592	8158	2260	1138	1122	1092	274	252	602	1066.2	1479.36	491	54	21.381	11.317	43.552
s_1_1_NewScaffoldedContig_1593	4252	811	441	370	224	70	179	332	717.125	655.289	96	54	12.859	15.313	26.482
s_1_1_NewScaffoldedContig_1594	59736	16583	8282	8301	10458	2238	523	3117	1414.44	1698.13	3559	63	22.385	10.561	40.872
s_1_1_NewScaffoldedContig_1595	26759	8531	4263	4268	5322	1096	329	1661	1451.43	1698.25	1525	61	24.966	11.202	44.811
s_1_1_NewScaffoldedContig_1596	2288	404	208	196	166	54	68	108	370.446	265.138	73	32	14.856	5.387	37.85
s_1_1_NewScaffoldedContig_1597	1244	184	93	91	60	44	28	47	325.1	31.195	51	24	12.684	4.989	37.942
s_1_1_NewScaffoldedContig_1598	7850	1248	618	630	652	238	124	208	846.801	1159.87	222	36	13.975	8.053	33.452
s_1_1_NewScaffoldedContig_1599	11070	1315	690	625	548	232	199	311	611.982	904.318	253	44	9.778	10.691	24.526
s_1_1_NewScaffoldedContig_1600	51999	11201	5572	5629	6890	1898	208	1987	1353.79	1679.46	1736	52	18.13	8.286	39.312
s_1_1_NewScaffoldedContig_1601	24971	6856	3445	3411	4066	914	494	1264	1379.15	1680.77	1570	174	22.071	11.507	40.715
s_1_1_NewScaffoldedContig_1602	64340	14798	7415	7383	8894	2252	632	2777	1366.4	1677.34	2905	71	18.797	10.376	38.895
s_1_1_NewScaffoldedContig_1603	22090	4613	2346	2267	2658	732	262	877	1314.94	1692.2	1166	49	17.483	8.494	38.909
s_1_1_NewScaffoldedContig_1604	7273	1909	970	939	930	348	261	345	938.581	1373.56	395	50	21.2	10.722	39.489
s_1_1_NewScaffoldedContig_1605	17640	4117	2105	2012	2200	598	335	922	1217.09	1581.33	882	51	18.854	9.939	37.143
s_1_1_NewScaffoldedContig_1606	18782	5927	2925	3002	3014	1002	383	1450	1174.57	1488.43	1025	86	24.437	12.501	43.233
s_1_1_NewScaffoldedContig_1607	13706	3661	1821	1840	1180	436	734	1272	1026.66	1421.04	1199	1211	18.993	64.73	34.146
s_1_1_NewScaffoldedContig_1608	10311	1340	651	689	610	224	202	269	632.823	916.852	219	37	11.359	8.047	31.995
s_1_1_NewScaffoldedContig_1609	53463	16025	8011	8014	10260	2230	385	2897	1458.36	1699.73	3169	62	23.772	9.417	44.401
s_1_1_NewScaffoldedContig_1610	24411	12910	6524	6386	6784	1094	1432	3477	1556.75	1695.56	2728	144	34.529	22.742	48.761
s_1_1_NewScaffoldedContig_1611	19864	2476	1242	1234	1142	518	175	593	792.413	1136.78	392	49	10.581	9.517	27.532
s_1_1_NewScaffoldedContig_1612	30480	19772	10084	9688	12348	1884	778	4587	1683.27	1715.54	4048	96	44.406	13.705	55.938
s_1_1_NewScaffoldedContig_1613	5872	2625	1292	1333	1334	284	342	635	926.873	1143.65	593	56	31.774	8.658	53.832
s_1_1_NewScaffoldedContig_1614	78225	38385	19264	19121	24930	3994	841	8200	1669.45	1745.38	8244	132	35.34	13.04	51.411
s_1_1_NewScaffoldedContig_1615	23761	9173	4606	4567	4958	960	734	2428	1346.32	1596.31	2184	412	28.375	20.924	44.943
s_1_1_NewScaffoldedContig_1616	5757	34914	17909	17005	2644	6956	3063	21862	815.92	1411.08	30874	7751	513.17	1173.77	11.065
s_1_1_NewScaffoldedContig_1617	2947	1510	777	733	490	106	251	643	660.461	680.432	338	64	34.307	11.984	57.686
s_1_1_NewScaffoldedContig_1618	20799	5956	2912	3044	3702	856	262	1052	1290.21	1622.2	1201	65	23.264	9.235	43.574
s_1_1_NewScaffoldedContig_1619	995	2290	1238	1052	30	14	1445	792	349.733	23.99	2087	1860	201.325	497.073	37.99
s_1_1_NewScaffoldedContig_1620	11242	2630	1284	1346	1354	390	256	598	1161.11	1540.67	627	47	18.744	10.378	37.324
s_1_1_NewScaffoldedContig_1621	5976	2604	1273	1331	1222	262	419	671	965.239	1288.79	563	80	32.378	14.195	47.741
s_1_1_NewScaffoldedContig_1622	103972	37263	18815	18448	23944	4368	973	7530	1491.85	1691.99	7248	133	27.075	11.494	47.156
s_1_1_NewScaffoldedContig_1623	4538	1648	752	896	664	186	326	448	576.578	619.959	435	87	26.354	10.482	53.592
s_1_1_NewScaffoldedContig_1624	2402	150	82	68	28	18	41	61	338	26.262	19	24	5.09	6.909	15.445
s_1_1_NewScaffoldedContig_1625	3071	777	417	360	256	76	218	217	387.227	317.889	336	219	20.616	27.855	38.554
s_1_1_NewScaffoldedContig_1626	19704	3945	2005	1940	2224	720	218	694	1034.91	1455.11	771	47	17.265	7.744	39.033
s_1_1_NewScaffoldedContig_1627	9862	165310	81498	83812	51272	35338	16800	59141	1141.16	1372.78	31247	4327	1034.02	1133.84	58.122
s_1_1_NewScaffoldedContig_1628	616	24113	11978	12135	5868	2434	5252	10316	332.389	28.608	3676	4337	2521.54	1101.82	56.169
s_1_1_NewScaffoldedContig_1629	21783	7676	3816	3860	4414	838	633	1695	1351.78	1626.72	1689	65	26.31	13.738	44.521
s_1_1_NewScaffoldedContig_1630	2445	1552	814	738	506	96	346	585	428.656	365.874	456	124	44.15	16.912	56.115
s_1_1_NewScaffoldedContig_1631	10025	3431	1738	1693	1534	376	518	965	1137.62	1502.27	711	65	25.605	15.652	39.511
s_1_1_NewScaffoldedContig_1632	18000	910279	427649	482630	1274	29876	180820	688147	1275.07	1708.3	835009	802545	3044.65	41796.7	32.478
s_1_1_NewScaffoldedContig_1633	23396	8448	4357	4091	4688	962	743	1951	1311.51	1557.49	1603	67	26.664	14.106	44.67
s_1_1_NewScaffoldedContig_1634	13762	2672	1295	1377	1386	454	211	573	950.965	1344.12	473	45	16.282	8.394	37.72
s_1_1_NewScaffoldedContig_1635	25952	4460	2245	2215	2094	728	548	1007	1087.38	1518.55	971	169	14.187	11.45	30.036
s_1_1_NewScaffoldedContig_1636	2656	1593	667	926	18	18	801	747	354.444	23.386	1324	481	43.383	103.308	16.943
s_1_1_NewScaffoldedContig_1637	7287	1471	736	735	750	260	165	264	900.72	1285.87	275	38	17.138	5.994	38.548
s_1_1_NewScaffoldedContig_1638	692	6508	3213	3295	1362	428	1820	2826	331.43	28.33	1584	1001	701.22	206.009	48.41
s_1_1_NewScaffoldedContig_1639	16595	3625	1800	1825	2110	630	219	595	1243.84	1607.68	615	44	18.652	6.67	40.03
s_1_1_NewScaffoldedContig_1640	12809	2974	1461	1513	1598	480	289	535	1162.3	1552.93	550	128	19.381	7.937	39.886
s_1_1_NewScaffoldedContig_1641	9788	2027	945	1082	478	280	454	786	601.745	788.746	809	279	14.931	26.135	30.599
s_1_1_NewScaffoldedContig_1642	26094	6161	3271	2890	1818	560	1110	2600	1172.62	1587.3	2395	2004	16.217	79.446	27.673
s_1_1_NewScaffoldedContig_1643	10928	1249	625	624	582	256	124	260	888.474	1276.53	272	33	9.588	7.644	26.29
s_1_1_NewScaffoldedContig_1644	24027	3707	1864	1843	1968	500	478	706	1075.3	1483.11	599	52	12.594	10.747	28.614
s_1_1_NewScaffoldedContig_1645	23390	12409	6156	6253	7630	1234	447	2972	1606.81	1722.27	2944	75	37.381	11.752	54.361
s_1_1_NewScaffoldedContig_1646	47040	10340	5141	5199	6476	1532	266	1883	1338.27	1638.47	1995	53	18.123	9.883	37.791
s_1_1_NewScaffoldedContig_1647	49937	11673	5820	5853	7278	1854	433	1897	1297.25	1644.29	2606	57	19.701	9.698	39.326
s_1_1_NewScaffoldedContig_1648	25714	8159	4069	4090	4944	1096	332	1658	1341.61	1672.01	1720	57	25.467	9.623	44.785
s_1_1_NewScaffoldedContig_1649	23359	13359	6736	6623	8748	1076	645	2775	1828.37	1795.61	2138	115	38.191	18.328	55.996
s_1_1_NewScaffoldedContig_1650	3113	1652	824	828	728	156	322	429	573.019	594.072	375	64	35.903	12.138	63.026
s_1_1_NewScaffoldedContig_1651	1031	648	360	288	128	52	208	254	325.375	32.138	252	78	44.447	23.064	51.309
s_1_1_NewScaffoldedContig_1652	553	151	74	77	26	24	48	51	357.462	24.327	30	31	14.843	8.226	70.344
s_1_1_NewScaffoldedContig_1653	25380	3294	1628	1666	1566	592	333	718	1179.84	1602.79	750	104	10.826	8.563	29.437
s_1_1_NewScaffoldedContig_1654	39057	11419	5701	5718	6772	1552	714	2228	1330.4	1657.82	2478	123	23.321	11.637	41.695
s_1_1_NewScaffoldedContig_1655	25384	7012	3435	3577	3632	1000	828	1463	1035.6	1393.28	1584	112	21.927	12.689	39.131
s_1_1_NewScaffoldedContig_1656	31885	10374	5311	5063	1374	700	2785	5400	1028.6	1472.16	6485	4507	21.308	184.956	23.45
s_1_1_NewScaffoldedContig_1657	6671	1713	892	821	662	262	348	408	868.716	1225.82	469	123	20.651	11.417	38.18
s_1_1_NewScaffoldedContig_1658	5511	882	444	438	398	156	153	164	619.543	941.228	145	45	13.45	8.598	32.462
s_1_1_NewScaffoldedContig_1659	5056	594	296	298	120	84	153	224	450.2	432.775	147	45	8.829	10.534	21.638
s_1_1_NewScaffoldedContig_1660	2102	525	294	231	172	50	75	219	353.442	181.757	159	41	18.834	9.053	42.008
s_1_1_NewScaffoldedContig_1661	51098	11128	5604	5524	6434	1778	528	2187	1377.81	1715.56	2510	475	18.099	14.963	39.252
s_1_1_NewScaffoldedContig_1662	11340	3454	1733	1721	1898	404	373	727	1124.53	1467.06	771	57	24.054	10.332	44.268
s_1_1_NewScaffoldedContig_1663	38109	7184	3511	3673	4104	1190	270	1468	1271.02	1611.67	1212	51	15.839	9.336	35.908
s_1_1_NewScaffoldedContig_1664	41374	12043	6016	6027	7236	1532	688	2417	1429.15	1669.61	2242	180	22.469	11.038	44.352
s_1_1_NewScaffoldedContig_1665	1316	722	386	336	84	30	324	271	323.333	24.486	255	99	34.773	22.194	56.915
s_1_1_NewScaffoldedContig_1666	2335	1544	785	759	522	124	433	450	449.372	410.875	396	103	44.916	14.249	59.143
s_1_1_NewScaffoldedContig_1667	35862	7850	3890	3960	4286	954	789	1687	1197.66	1578.64	1480	72	17.756	13.372	32.949
s_1_1_NewScaffoldedContig_1668	44290	11846	5860	5986	7082	1678	484	2403	1536.38	1738.67	1809	89	20.888	12.332	39.223
s_1_1_NewScaffoldedContig_1669	8923	2127	1106	1021	1146	334	209	397	1066.08	1458.77	298	42	19.431	7.348	42.06
s_1_1_NewScaffoldedContig_1670	5058	3345	1683	1662	1380	260	673	994	766.413	846.615	804	76	44.887	12.848	58.205
s_1_1_NewScaffoldedContig_1671	56124	11079	5525	5554	6458	1932	498	1989	1271.54	1681.04	2010	75	16.717	9.054	35.222
s_1_1_NewScaffoldedContig_1672	7849	2114	1096	1018	1108	308	244	420	911.291	1291.3	491	57	22.578	8.274	42.54
s_1_1_NewScaffoldedContig_1673	2758	231	112	119	124	28	33	38	370.984	189.569	44	16	8.131	3.275	38.506
s_1_1_NewScaffoldedContig_1674	576	121	66	55	18	16	45	39	317.556	28.308	12	31	16.682	7.059	41.146
s_1_1_NewScaffoldedContig_1675	28489	6795	3439	3356	3586	982	702	1406	1054.34	1431.94	1287	119	19.256	11.394	37.881
s_1_1_NewScaffoldedContig_1676	15808	4980	2510	2470	2624	598	437	1239	1181.21	1560.1	1194	66	24.721	13.092	42.175
s_1_1_NewScaffoldedContig_1677	10663	5756	2805	2951	3376	488	500	1334	1452.58	1579.06	1176	73	37.268	11.302	55.847
s_1_1_NewScaffoldedContig_1678	15170	1590	790	800	712	304	152	387	961.191	1375.78	293	35	9.125	8.291	23.744
s_1_1_NewScaffoldedContig_1679	5267	1363	647	716	578	194	260	310	603.221	860.442	250	47	21.136	9.59	38.542
s_1_1_NewScaffoldedContig_1680	580	510	291	219	12	28	73	389	356.167	25.945	293	138	43.498	32.415	59.655
s_1_1_NewScaffoldedContig_1681	7761	2889	1510	1379	1488	332	444	591	872.321	1150.14	596	55	27.978	9.875	49.208
s_1_1_NewScaffoldedContig_1682	46364	14454	7197	7257	9088	1684	716	2789	1490.4	1705.05	2409	112	24.07	11.814	45.969
s_1_1_NewScaffoldedContig_1683	33386	8487	4283	4204	5154	1342	277	1557	1424.85	1717.12	1720	59	20.871	8.122	41.529
s_1_1_NewScaffoldedContig_1684	7388	257	141	116	10	12	75	154	2133.8	2232.56	53	32	1.885	4.707	13.603
s_1_1_NewScaffoldedContig_1685	26065	4082	2024	2058	2038	762	279	904	1160.74	1588.48	776	46	13.236	10.227	29.929
s_1_1_NewScaffoldedContig_1686	33965	19306	9687	9619	12364	1776	695	4292	1759.95	1759.86	4127	115	38.153	17.271	54.818
s_1_1_NewScaffoldedContig_1687	15493	5704	2828	2876	2636	492	759	1744	1192.55	1431.89	1290	103	24.092	20.752	39.173
s_1_1_NewScaffoldedContig_1688	22774	3888	1949	1939	1998	616	387	796	1028.2	1455.58	755	67	14.4	7.197	36.024
s_1_1_NewScaffoldedContig_1689	7422	1233	615	618	644	192	161	220	864.972	1239.78	208	40	13.91	6.438	38.103
s_1_1_NewScaffoldedContig_1690	1594	133	58	75	64	8	24	33	334.188	30.054	39	15	7.673	3.228	39.335
s_1_1_NewScaffoldedContig_1691	2180	507	243	264	130	50	205	114	328.831	31	166	89	17.88	13.053	39.587
s_1_1_NewScaffoldedContig_1692	26194	5789	2905	2884	3442	912	369	956	1244.77	1635.05	1100	51	18.404	9.31	37.711
s_1_1_NewScaffoldedContig_1693	1600	528	282	246	120	54	183	162	333.55	26.136	214	100	24.081	13.8	39.5
s_1_1_NewScaffoldedContig_1694	16793	5070	2542	2528	2538	648	652	1165	1081.85	1440.35	1298	176	23.765	15.69	40.785
s_1_1_NewScaffoldedContig_1695	2870	228	99	129	108	22	36	59	361.352	226.686	49	18	6.788	3.925	38.85
s_1_1_NewScaffoldedContig_1696	19872	3391	1688	1703	1816	512	311	697	1161.35	1570.42	716	45	14.096	9.667	33.057
s_1_1_NewScaffoldedContig_1697	2280	1260	634	626	402	116	360	363	488.876	503.105	303	64	36	9.923	63.289
s_1_1_NewScaffoldedContig_1698	7335	3623	1861	1762	1824	392	512	848	961.151	1247.23	723	74	36.619	10.128	52.134
s_1_1_NewScaffoldedContig_1699	2013	1070	537	533	388	170	234	256	339.691	101.143	287	81	45.996	16.916	41.282
s_1_1_NewScaffoldedContig_1700	815	417	205	212	102	76	88	145	334.98	30.028	129	74	40.067	15.763	35.951
s_1_1_NewScaffoldedContig_1701	18127	3235	1668	1567	1150	488	646	895	929.233	1370.64	1082	455	14.689	26.9	29.707
s_1_1_NewScaffoldedContig_1702	4989	20387	10224	10163	9068	5558	928	4565	711.689	817.936	4777	458	293.436	61.305	53.979
s_1_1_NewScaffoldedContig_1703	631	2569	1096	1473	10	28	1257	1251	326.4	13.366	2391	1097	290.876	359.526	38.827
s_1_1_NewScaffoldedContig_1704	29601	8639	4361	4278	2908	928	2254	2449	1023.27	1432.04	3891	848	23.035	54.243	30.246
s_1_1_NewScaffoldedContig_1705	10869	1712	833	879	660	236	387	406	663.391	982.563	353	45	12.35	10.484	30.481
s_1_1_NewScaffoldedContig_1706	2868	1075	545	530	452	130	248	235	459.832	428.692	257	57	29	10.09	46.199
s_1_1_NewScaffoldedContig_1707	11905	4348	2231	2117	2224	424	348	1303	1173.44	1466.43	863	70	26.247	16.649	44.326
s_1_1_NewScaffoldedContig_1708	4474	943	461	482	462	154	131	176	453.775	436.855	149	41	18.18	6.946	38.69
s_1_1_NewScaffoldedContig_1709	32925	5854	2841	3013	3148	1018	289	1280	1311.88	1677.04	945	48	15.104	8.239	36.03
s_1_1_NewScaffoldedContig_1710	9279	1932	972	960	672	208	476	547	987.205	1342.76	601	368	15.655	26.586	29.292
s_1_1_NewScaffoldedContig_1711	525	1107	494	613	12	4	581	504	342.5	14.292	1029	555	163.49	199.922	43.81
s_1_1_NewScaffoldedContig_1712	7029	2214	1069	1145	532	238	714	703	786.891	1108.3	792	808	21.562	59.298	33.234
s_1_1_NewScaffoldedContig_1713	53754	8255	4138	4117	4436	1522	423	1687	1218.53	1624.63	1520	52	13.17	9.539	30.72
s_1_1_NewScaffoldedContig_1714	12887	2452	1258	1194	1096	338	396	576	880.947	1328.38	636	87	15.331	10.801	32.917
s_1_1_NewScaffoldedContig_1715	976	1430	773	657	100	38	413	860	348.14	36.291	989	313	96.855	71.583	54.406
s_1_1_NewScaffoldedContig_1716	13603	4830	2406	2424	2260	512	612	1390	1076.75	1368.8	1200	113	26.045	17.224	41.028
s_1_1_NewScaffoldedContig_1717	2796	918	508	410	318	72	199	319	546.503	580.706	155	53	22.982	13.59	46.28
s_1_1_NewScaffoldedContig_1718	19215	3975	2010	1965	2030	566	453	858	1274.89	1633.16	727	68	16.48	11.935	33.328
s_1_1_NewScaffoldedContig_1719	10208	2645	1321	1324	1384	350	259	627	1088.07	1417.2	492	52	20.211	11.257	39.518
s_1_1_NewScaffoldedContig_1720	23720	5015	2538	2477	2512	926	431	1056	1192.12	1591.46	1062	58	17.435	10.649	36.155
s_1_1_NewScaffoldedContig_1721	43739	11344	5677	5667	6846	1550	498	2286	1390.52	1665.29	2511	86	20.887	9.779	41.615
s_1_1_NewScaffoldedContig_1722	54944	15321	7626	7695	9630	2232	415	2788	1450.97	1720.46	2808	67	22.363	9.667	43.224
s_1_1_NewScaffoldedContig_1723	3621	595	314	281	212	70	160	145	443.217	430.244	100	30	12.494	5.587	41.812
s_1_1_NewScaffoldedContig_1724	13107	3185	1599	1586	1722	520	160	715	1200.71	1511.78	691	51	19.788	10.59	39.696
s_1_1_NewScaffoldedContig_1725	21011	6547	3303	3244	3488	740	687	1539	1300.51	1587.45	1479	63	23.238	15.221	38.394
s_1_1_NewScaffoldedContig_1726	4705	2635	1360	1275	1056	280	401	868	565.992	649.313	682	99	41.896	21.531	49.904
s_1_1_NewScaffoldedContig_1727	6091	626	339	287	240	118	126	115	511.525	620.685	122	39	9.017	7.219	28.304
s_1_1_NewScaffoldedContig_1728	3607	929	438	491	414	136	149	216	559.386	578.782	200	44	20.547	7.723	43.804
s_1_1_NewScaffoldedContig_1729	17661	3312	1652	1660	1726	552	336	644	1233.2	1670.02	663	70	15.537	9.064	33.809
s_1_1_NewScaffoldedContig_1730	20790	10119	4959	5160	5986	1082	552	2380	1518.42	1659.96	2333	71	34.644	10.392	53.285
s_1_1_NewScaffoldedContig_1731	1176	302	171	131	72	24	136	65	340.25	34.661	61	37	18.588	7.731	50.51
s_1_1_NewScaffoldedContig_1732	4891	18634	9236	9398	8196	5236	981	4043	752.581	874.638	4686	431	270.669	62.435	53.302
s_1_1_NewScaffoldedContig_1733	4156	64271	30533	33738	1106	1136	17851	43524	661.658	675.173	52159	11477	840.658	1767.85	50.842
s_1_1_NewScaffoldedContig_1734	15937	6086	3095	2991	3448	790	390	1366	1326.61	1581.52	1427	65	29.404	10.733	47.525
s_1_1_NewScaffoldedContig_1735	867	501	231	270	72	32	218	174	331.472	29.287	199	178	40.362	32.554	49.481
s_1_1_NewScaffoldedContig_1736	7460	2558	1236	1322	1236	302	347	625	1108.97	1414.63	534	63	26.828	9.547	44.584
s_1_1_NewScaffoldedContig_1737	20143	2830	1437	1393	1416	520	267	572	1149.18	1540.34	468	42	11.965	8.804	29.544
s_1_1_NewScaffoldedContig_1738	55162	15559	8026	7533	9142	1958	860	3371	1381.87	1689.77	3002	334	22.166	14.515	39.908
s_1_1_NewScaffoldedContig_1739	2361	640	315	325	174	58	214	185	367.782	210.042	111	48	20.542	13.697	36.425
s_1_1_NewScaffoldedContig_1740	18655	6690	3294	3396	1078	402	2023	3118	1007.21	1428.25	3919	1757	25.399	127.278	27.414
s_1_1_NewScaffoldedContig_1741	2064	7169	3616	3553	1404	450	2578	2665	393.191	272.958	4272	688	243.841	132.824	55.814
s_1_1_NewScaffoldedContig_1742	519	57	21	36	6	14	17	20	328.333	20.854	8	16	8.655	3.318	37.765
s_1_1_NewScaffoldedContig_1743	912	80	44	36	20	20	15	21	348.3	18.831	16	19	8.223	4.333	34.211
s_1_1_NewScaffoldedContig_1744	22022	6855	3493	3362	4042	960	350	1392	1334.29	1668.89	1365	60	25.135	10.039	43.211
s_1_1_NewScaffoldedContig_1745	50708	18056	9115	8941	10232	2132	1356	4110	1427.1	1699.54	4037	307	27.262	16.742	42.883
s_1_1_NewScaffoldedContig_1746	9224	1608	780	828	706	216	185	468	920.391	1380.89	307	42	14.245	12.315	28.491
s_1_1_NewScaffoldedContig_1747	8144	35599	18181	17418	10876	4328	6429	13635	476.89	463.216	17802	1860	311.562	346.303	27.345
s_1_1_NewScaffoldedContig_1748	40710	12072	5989	6083	7032	1576	879	2434	1257.61	1566	1951	71	23.445	10.09	42.614
s_1_1_NewScaffoldedContig_1749	6869	1631	801	830	680	214	267	440	789.547	1164.79	469	82	18.896	13.047	36.774
s_1_1_NewScaffoldedContig_1750	16040	6275	3177	3098	984	358	2890	1980	982.305	1349.67	4592	1874	33.982	174.941	30.58
s_1_1_NewScaffoldedContig_1751	4606	2962	1467	1495	1032	224	641	1039	843.506	802.809	1025	428	42.633	46.235	60.855
s_1_1_NewScaffoldedContig_1752	1620	306	155	151	120	68	74	41	327.833	32.245	37	41	15.877	8.663	36.42
s_1_1_NewScaffoldedContig_1753	56568	20782	10323	10459	12238	2486	1380	4392	1463.67	1660.65	4697	865	27.153	27.496	43.698
s_1_1_NewScaffoldedContig_1754	84061	16594	8290	8304	8516	2476	1462	3877	1277.79	1654.31	3375	742	16.021	21.896	32.945
s_1_1_NewScaffoldedContig_1755	3183	968	532	436	410	96	188	258	465.624	447.22	288	56	24.921	10.783	44.518
s_1_1_NewScaffoldedContig_1756	949	6919	3590	3329	1964	1008	1121	2714	332.174	28.09	4459	893	605.893	180.634	41.939
s_1_1_NewScaffoldedContig_1757	3242	598	290	308	194	118	125	142	415.371	360.195	174	49	15.586	7.546	36.089
s_1_1_NewScaffoldedContig_1758	2915	18504	8459	10045	1774	1514	5438	9591	331.485	29.108	15127	6796	511.98	1106.37	37.77
s_1_1_NewScaffoldedContig_1759	508	694	380	314	0	0	382	308			573	595	77.935	157.257	38.976
s_1_1_NewScaffoldedContig_1760	36755	7325	3636	3689	4018	1096	335	1731	1270.34	1612.93	1377	51	16.34	10.004	36.784
s_1_1_NewScaffoldedContig_1761	5223	1913	998	915	742	200	466	479	549.464	644.055	623	234	28.98	26.815	45.089
s_1_1_NewScaffoldedContig_1762	25993	10982	5552	5430	6262	1048	766	2777	1403.91	1618.78	2318	88	29.793	17.029	47.313
s_1_1_NewScaffoldedContig_1763	58303	12899	6361	6538	7526	1830	697	2629	1353.41	1670.5	2217	106	17.934	10.913	36.25
s_1_1_NewScaffoldedContig_1764	2759	721	356	365	198	126	168	217	350.03	153.123	148	37	20.95	7.089	42.008
s_1_1_NewScaffoldedContig_1765	3293	1470	754	716	578	90	370	410	522.066	518.312	439	108	32.63	13.886	51.108
s_1_1_NewScaffoldedContig_1766	5361	1965	941	1024	710	244	404	580	845.138	1020.68	439	63	26.809	13.924	47.808
s_1_1_NewScaffoldedContig_1767	34586	6567	3311	3256	3696	992	419	1319	1143.02	1560.54	1370	45	16.171	9.743	34.118
s_1_1_NewScaffoldedContig_1768	30434	8925	4460	4465	4998	1224	549	2005	1305.4	1606.67	1949	59	23.304	11.984	41.256
s_1_1_NewScaffoldedContig_1769	141015	48695	24396	24299	31240	5868	1092	9806	1527.32	1723.73	10273	220	26.663	10.378	47.221
s_1_1_NewScaffoldedContig_1770	14146	2523	1243	1280	1250	364	243	619	1184.12	1573.77	471	67	14.475	10.448	33.331
s_1_1_NewScaffoldedContig_1771	30811	10237	4931	5306	2522	854	3106	3655	1198.47	1663.15	5303	4003	25.739	165.406	28.668
s_1_1_NewScaffoldedContig_1772	27766	8379	4190	4189	4744	950	738	1845	1385.55	1635.02	1566	61	22.746	13.18	40.791
s_1_1_NewScaffoldedContig_1773	2618	382	204	178	196	12	47	118	395.296	322.581	99	26	12.177	5.13	50.611
s_1_1_NewScaffoldedContig_1774	10078	2790	1406	1384	1402	298	371	682	1204.91	1582.51	596	78	21.681	14.011	36.714
s_1_1_NewScaffoldedContig_1775	2346	1043	478	565	418	78	286	246	404.785	315.69	153	54	33.502	9.623	51.876
s_1_1_NewScaffoldedContig_1776	5235	1322	654	668	558	164	290	283	438.867	409.483	279	45	20.331	8.856	41.547
s_1_1_NewScaffoldedContig_1777	41422	15599	7789	7810	9672	1882	681	3201	1477.31	1668.51	2857	75	28.268	12.7	45.546
s_1_1_NewScaffoldedContig_1778	1421	690	373	317	166	42	230	241	324.831	29.147	200	60	31.738	10.768	58.41
s_1_1_NewScaffoldedContig_1779	3584	285	147	138	118	42	50	71	581.949	600.589	68	29	6.449	6.17	27.762
s_1_1_NewScaffoldedContig_1780	31274	5690	2827	2863	3346	962	218	1035	1360.7	1694.27	1061	49	15.278	7.927	37.293
s_1_1_NewScaffoldedContig_1781	7479	2550	1239	1311	1050	230	396	844	1192.62	1611.61	817	73	24.93	17.109	37.946
s_1_1_NewScaffoldedContig_1782	2047	357	188	169	164	58	76	52	329.817	25.862	86	32	15.183	6.303	39.179
s_1_1_NewScaffoldedContig_1783	13907	2483	1254	1229	1286	458	148	538	933.44	1392.39	457	49	15.555	8.56	36.809
s_1_1_NewScaffoldedContig_1784	27264	9099	4562	4537	5390	1166	522	1870	1292.16	1591.24	2266	140	26.701	11.266	44.583
s_1_1_NewScaffoldedContig_1785	852	253	120	133	34	10	89	118	355.059	30.385	55	46	20.437	12.341	46.362
s_1_1_NewScaffoldedContig_1786	43140	17037	8502	8535	10488	1864	713	3760	1471.35	1670.56	3843	74	29.512	12.95	48.245
s_1_1_NewScaffoldedContig_1787	24526	5648	2826	2822	3394	950	202	988	1272.81	1627.12	1080	52	19.465	7.547	41.266
s_1_1_NewScaffoldedContig_1788	11268	2931	1424	1507	1398	400	492	601	842.552	1282.58	524	68	20.8	14.008	35.96
s_1_1_NewScaffoldedContig_1789	5075	1385	673	712	680	216	160	307	591.288	746.346	241	60	22.847	9.191	43.074
s_1_1_NewScaffoldedContig_1790	3687	307	160	147	92	56	85	68	439.022	392.207	57	21	6.803	6.318	21.535
s_1_1_NewScaffoldedContig_1791	26146	7156	3694	3462	3728	1032	801	1501	1166.89	1548.21	1560	80	21.802	12.05	39.084
s_1_1_NewScaffoldedContig_1792	3957	465	232	233	248	46	67	91	440.726	392.68	94	27	10.819	4.042	41.648
s_1_1_NewScaffoldedContig_1793	1139	806	401	405	92	34	77	598	331.196	29.659	330	105	37.875	21.736	59.526
s_1_1_NewScaffoldedContig_1794	521	99	46	53	0	2	41	55			68	64	9.42	15.734	29.367
s_1_1_NewScaffoldedContig_1795	17260	3945	1870	2075	1096	398	1271	1114	734.765	1093.92	2067	868	19.591	67.646	27.439
s_1_1_NewScaffoldedContig_1796	17016	4394	2266	2128	2504	636	313	858	1213.19	1540.02	700	75	21.101	8.422	42.002
s_1_1_NewScaffoldedContig_1797	2304	351	179	172	128	62	81	74	355.469	182.644	83	25	12.625	5.5	37.109
s_1_1_NewScaffoldedContig_1798	577	131	74	57	14	22	41	51	334.143	27.111	31	28	15.544	5.54	57.712
s_1_1_NewScaffoldedContig_1799	787	151	83	68	38	12	49	50	325.158	26.555	33	28	12.822	6.706	66.328
s_1_1_NewScaffoldedContig_1800	49459	10077	5057	5020	5784	1638	565	1913	1264.87	1627.01	1756	49	16.782	9.165	37.991
s_1_1_NewScaffoldedContig_1801	5529	1083	566	517	340	142	264	323	799.394	1106.42	272	207	15.107	16.998	35.757
s_1_1_NewScaffoldedContig_1802	17343	4494	2212	2282	2260	674	450	1036	1152.25	1472.68	972	49	20.729	9.88	39.935
s_1_1_NewScaffoldedContig_1803	42974	12875	6418	6457	7784	1674	583	2631	1389.48	1672.4	2272	151	23.503	10.903	43.724
s_1_1_NewScaffoldedContig_1804	2598	329	166	163	154	34	35	102	407.286	307.037	71	27	10.612	4.691	45.881
s_1_1_NewScaffoldedContig_1805	26131	6804	3397	3407	4006	984	350	1342	1306.94	1585.24	1318	52	20.68	9.374	42.995
s_1_1_NewScaffoldedContig_1806	26020	8721	4378	4343	5352	1214	323	1720	1453.35	1728.73	1872	65	26.632	9.61	44.912
s_1_1_NewScaffoldedContig_1807	5023	6078	2645	3433	16	86	1075	4819	4640.5	110.983	2225	2928	48.482	312.971	3.783
s_1_1_NewScaffoldedContig_1808	2829	1367	680	687	400	72	406	472	518.83	530.171	288	58	30.606	12.274	58.431
s_1_1_NewScaffoldedContig_1809	2724	1748	863	885	644	126	375	586	487.655	470.762	510	75	41.938	14.05	62.739
s_1_1_NewScaffoldedContig_1810	17257	3061	1528	1533	1720	540	185	531	1132.2	1574.18	556	44	15.443	6.326	37.168
s_1_1_NewScaffoldedContig_1811	42412	8117	4102	4015	4754	1460	339	1396	1259.97	1636.9	1381	45	16.359	8.33	36.664
s_1_1_NewScaffoldedContig_1812	3449	1198	579	619	498	154	291	243	488.12	495.409	213	47	27.06	8.283	44.535
s_1_1_NewScaffoldedContig_1813	15016	3581	1765	1816	1986	536	241	762	1223.14	1540.36	679	48	19.057	9.387	39.864
s_1_1_NewScaffoldedContig_1814	81560	19729	9863	9866	12144	2900	737	3639	1399.85	1704.07	3317	187	19.758	10.411	39.811
s_1_1_NewScaffoldedContig_1815	30149	9718	5026	4692	5682	1220	488	2197	1491.87	1701.73	1697	66	24.433	14.28	40.326
s_1_1_NewScaffoldedContig_1816	33879	10450	5150	5300	6194	1278	493	2336	1406.82	1678.12	2028	78	24.094	13.592	40.057
s_1_1_NewScaffoldedContig_1817	33281	5632	2849	2783	3174	1002	223	1089	1301.9	1691.2	1056	46	14.492	8.11	34.692
s_1_1_NewScaffoldedContig_1818	33995	7211	3673	3538	3964	1020	517	1608	1295.24	1643.92	1469	61	16.843	10.949	36.352
s_1_1_NewScaffoldedContig_1819	40967	9637	4777	4860	6084	1400	361	1633	1421.37	1691.14	1801	55	19.236	9.754	39.761
s_1_1_NewScaffoldedContig_1820	4206	455	241	214	260	40	64	81	534.823	543.414	68	24	9.647	4.371	43.533
s_1_1_NewScaffoldedContig_1821	25713	10482	5307	5175	6054	1140	558	2597	1533.66	1708.56	2335	71	29.133	14.911	48.442
s_1_1_NewScaffoldedContig_1822	30951	4517	2231	2286	2408	846	354	809	1060.91	1460.89	696	50	12.459	8.748	31.14
s_1_1_NewScaffoldedContig_1823	95255	24494	12082	12412	13542	3440	1649	5486	1352.77	1679.31	5272	1136	20.377	24.478	38.912
s_1_1_NewScaffoldedContig_1824	17003	10300	5226	5074	6094	854	626	2606	1690.31	1716.2	1808	91	38.399	13.511	63.059
s_1_1_NewScaffoldedContig_1825	37390	7987	4001	3986	4720	1262	465	1367	1166.01	1562.78	1354	49	18.155	8.359	38.393
s_1_1_NewScaffoldedContig_1826	636	425	196	229	36	34	148	199	332.667	35.073	394	116	52.175	27.12	38.836
s_1_1_NewScaffoldedContig_1827	35832	12620	6386	6234	7816	1690	374	2564	1421.83	1675.32	2833	67	27.407	10.353	45.141
s_1_1_NewScaffoldedContig_1828	1148	507	261	246	116	88	156	145	333.052	29.072	188	128	31.267	20.036	46.167
s_1_1_NewScaffoldedContig_1829	30496	13935	7088	6847	8586	1542	576	3083	1548.18	1680.99	2310	75	33.155	12.344	50.59
s_1_1_NewScaffoldedContig_1830	2421	494	245	249	138	58	137	158	429.304	367.605	145	63	14.674	9.407	50.434
s_1_1_NewScaffoldedContig_1831	3024	1188	634	554	432	130	311	300	555.986	568.737	267	63	27.935	10.389	52.679
s_1_1_NewScaffoldedContig_1832	12891	5239	2674	2565	2766	540	491	1374	1352.33	1689.38	1099	75	29.636	14.353	48.545
s_1_1_NewScaffoldedContig_1833	11600	4966	2528	2438	2756	624	379	1146	1306.09	1552.11	1165	61	31.784	10.076	49.845
s_1_1_NewScaffoldedContig_1834	745	331	212	119	4	6	153	165	356	30	288	100	26.15	26.286	35.973
s_1_1_NewScaffoldedContig_1835	8615	1354	675	679	458	142	352	383	719.035	1248.99	500	300	12.554	23.872	25.456
s_1_1_NewScaffoldedContig_1836	37246	5183	2615	2568	2606	756	395	1344	1169.14	1536.04	988	47	10.93	9.969	32.406
s_1_1_NewScaffoldedContig_1837	16064	6792	3417	3375	4002	758	564	1388	1375.33	1619.92	1537	69	31.59	8.375	49.683
s_1_1_NewScaffoldedContig_1838	1496	791	395	396	212	60	285	225	333.028	28.297	227	63	36.275	12.147	51.471
s_1_1_NewScaffoldedContig_1839	43600	13629	6788	6841	8434	1784	373	2866	1426.07	1683.61	2993	62	24.549	10.657	44.908
s_1_1_NewScaffoldedContig_1840	29714	6859	3453	3406	3480	960	578	1715	1115.56	1484.78	1231	59	18.534	13.454	34.421
s_1_1_NewScaffoldedContig_1841	49399	12409	6279	6130	7000	1766	849	2594	1366.57	1677.49	3181	499	20.236	21.766	37.661
s_1_1_NewScaffoldedContig_1842	22302	1991	990	1001	948	338	258	403	691.762	1005.25	325	50	7.66	9.361	23.052
s_1_1_NewScaffoldedContig_1843	13910	4555	2261	2294	2350	498	577	1065	1072.95	1404.28	683	61	25.043	15.185	39.863
s_1_1_NewScaffoldedContig_1844	3730	2274	1215	1059	824	144	639	647	670.35	670.484	599	80	37.509	14.388	64.075
s_1_1_NewScaffoldedContig_1845	13971	3591	1817	1774	1538	454	554	991	1134.75	1562.32	1059	362	20.618	25.052	35.932
s_1_1_NewScaffoldedContig_1846	14656	9131	4618	4513	5472	752	888	1930	1564.86	1689.33	1970	82	42.267	12.693	57.963
s_1_1_NewScaffoldedContig_1847	32122	17627	9029	8598	11330	1706	736	3664	1620.58	1706.6	4157	82	38.71	10.959	54.897
s_1_1_NewScaffoldedContig_1848	9287	2324	1176	1148	1144	344	218	582	957.642	1303.35	523	48	20.084	8.844	40.196
s_1_1_NewScaffoldedContig_1849	37117	21159	10502	10657	13380	1930	553	5065	1798.46	1780.73	4686	86	37.699	16.43	56.572
s_1_1_NewScaffoldedContig_1850	5181	2144	1081	1063	746	228	434	714	689.858	799.129	603	69	30.079	16.929	45.126
s_1_1_NewScaffoldedContig_1851	4476	722	348	374	238	202	107	149	374.899	251.596	125	32	13.775	5.511	37.444
s_1_1_NewScaffoldedContig_1852	1884	406	183	223	98	34	112	152	334.796	32.303	82	40	16.152	9.71	47.081
s_1_1_NewScaffoldedContig_1853	4883	2020	994	1026	956	212	368	464	685.577	778.912	498	54	31.47	8.288	48.29
s_1_1_NewScaffoldedContig_1854	27205	7132	3630	3502	4228	902	449	1440	1372.28	1641.97	1474	64	21.168	11.261	40.162
s_1_1_NewScaffoldedContig_1855	11418	3030	1489	1541	1778	332	349	523	1213.72	1535.88	550	54	21.024	9.78	44.369
s_1_1_NewScaffoldedContig_1856	49446	13227	6711	6516	7636	1720	775	2916	1360.02	1668.03	2882	103	21.163	12.296	37.963
s_1_1_NewScaffoldedContig_1857	6519	1526	743	783	344	132	359	668	1217.61	1843.2	483	112	16.695	26.962	15.601
s_1_1_NewScaffoldedContig_1858	17930	6573	3247	3326	4044	854	362	1236	1521.8	1752.5	947	64	28.275	8.903	46.269
s_1_1_NewScaffoldedContig_1859	4894	2630	1368	1262	1094	182	501	821	974.048	1118.64	538	78	35.394	15.497	57.581
s_1_1_NewScaffoldedContig_1860	43085	8193	4064	4129	4886	1468	261	1436	1321.08	1670.82	1479	48	16.121	8.49	37.693
s_1_1_NewScaffoldedContig_1861	21362	6944	3502	3442	4122	910	366	1443	1366.97	1617.35	1612	144	25.447	10.508	46.269
s_1_1_NewScaffoldedContig_1862	46226	6463	3232	3231	3222	1184	611	1302	1191.78	1593.82	1279	222	11.793	11.842	28.33
s_1_1_NewScaffoldedContig_1863	45724	11191	5472	5719	6670	1512	631	2205	1392.8	1704.93	2000	85	19.778	10.584	39.5
s_1_1_NewScaffoldedContig_1864	67272	18302	9154	9148	11194	2474	696	3647	1440.72	1704.07	2992	61	21.664	10.718	40.761
s_1_1_NewScaffoldedContig_1865	2866	304	149	155	182	18	38	59	363.187	223.887	70	24	10.108	4.943	44.348
s_1_1_NewScaffoldedContig_1866	40229	4330	2078	2252	2008	556	598	1107	1023.54	1445.52	794	51	8.447	9.478	25.671
s_1_1_NewScaffoldedContig_1867	3767	1041	574	467	398	126	259	247	538.487	541.812	195	43	20.827	7.017	44.969
s_1_1_NewScaffoldedContig_1868	20297	2878	1451	1427	1560	622	125	495	1121.47	1511.76	420	37	12.688	6.814	34.286
s_1_1_NewScaffoldedContig_1869	5434	412	196	216	6	48	35	315	377	11.576	170	121	4.447	16.461	6.883
s_1_1_NewScaffoldedContig_1870	985	21968	11222	10746	5152	6850	4645	5064	333.09	28.114	7836	2328	1648.87	406.048	48.528
s_1_1_NewScaffoldedContig_1871	5398	1205	638	567	566	162	199	266	769.353	915.602	196	40	17.675	9.178	38.681
s_1_1_NewScaffoldedContig_1872	1210	234	124	110	42	28	69	90	340.619	23.282	42	36	14.391	7.997	37.355
s_1_1_NewScaffoldedContig_1873	10406	2034	971	1063	740	246	405	587	989.205	1468.26	587	248	16.018	17.612	33.49
s_1_1_NewScaffoldedContig_1874	1834	180	79	101	54	36	33	49	319.481	32.831	24	21	8.398	4.236	29.826
s_1_1_NewScaffoldedContig_1875	21111	1773	845	928	764	288	173	504	1114.09	1600.42	350	88	7.167	7.623	22.737
s_1_1_NewScaffoldedContig_1876	10305	1936	946	990	1050	284	127	446	870.21	1268.6	328	42	15.736	9.161	35.575
s_1_1_NewScaffoldedContig_1877	26770	4511	2243	2268	2520	794	200	915	1153.93	1554.62	729	48	14.499	9.221	33.623
s_1_1_NewScaffoldedContig_1878	11283	2545	1233	1312	1400	402	202	491	1040.94	1459.07	378	47	19.039	7.777	41.177
s_1_1_NewScaffoldedContig_1879	23157	7266	3686	3580	4244	956	461	1498	1391.57	1650.36	1133	69	24.572	10.636	44.211
s_1_1_NewScaffoldedContig_1880	24102	8277	4121	4156	5100	894	405	1765	1448.35	1690.72	1711	69	25.381	11.472	49.008
s_1_1_NewScaffoldedContig_1881	6340	1915	1037	878	844	262	350	423	826.171	1221.46	550	145	24.312	12.7	41.735
s_1_1_NewScaffoldedContig_1882	924	551	267	284	132	46	208	155	336	30.021	133	68	40.113	13.27	59.848
s_1_1_NewScaffoldedContig_1883	22399	9797	4804	4993	5522	908	978	2268	1521.48	1676.06	2083	157	30.241	20.038	43.765
s_1_1_NewScaffoldedContig_1884	61554	13639	6858	6781	7818	2076	710	2775	1332.15	1666.77	2757	58	18.145	9.784	38.87
s_1_1_NewScaffoldedContig_1885	34879	6420	3203	3217	3426	1014	408	1454	1214.81	1611.38	1160	52	15.348	10.963	31.715
s_1_1_NewScaffoldedContig_1886	4028	2586	1245	1341	942	160	838	613	782.31	741.66	533	85	39.959	15.601	64.598
s_1_1_NewScaffoldedContig_1887	53176	25510	12656	12854	15930	2580	1003	5698	1626.83	1729.69	5247	98	34.289	14.139	51.301
s_1_1_NewScaffoldedContig_1888	885	89	54	35	26	4	26	30	326.231	23.192	18	18	7.711	3.637	34.463
s_1_1_NewScaffoldedContig_1889	26697	1440	725	715	634	266	140	365	1193.39	1614.56	293	32	4.495	5.242	20.515
s_1_1_NewScaffoldedContig_1890	14912	2405	1227	1178	1262	452	197	432	1071.22	1490.32	506	78	14.189	7.194	36.407
s_1_1_NewScaffoldedContig_1891	2519	1295	669	626	384	96	267	542	520.115	507.432	246	62	33.828	9.858	55.339
s_1_1_NewScaffoldedContig_1892	7161	419	231	188	174	70	64	107	463.345	436.512	82	29	4.84	6.428	18.922
s_1_1_NewScaffoldedContig_1893	6389	252	112	140	94	22	48	85	427.809	670.329	54	25	3.229	5.759	11.864
s_1_1_NewScaffoldedContig_1894	535	226	100	126	22	12	106	82	332.545	26.848	45	50	26.574	12.614	53.832
s_1_1_NewScaffoldedContig_1895	1506	581	336	245	148	44	181	203	331.716	28.872	146	61	26.698	11.98	54.05
s_1_1_NewScaffoldedContig_1896	66715	3910	1930	1980	2096	728	240	774	1133.35	1623.34	581	26	5.048	5.191	22.311
s_1_1_NewScaffoldedContig_1897	3666	1384	691	693	608	148	312	297	500.365	514.531	342	49	29.416	6.758	50.709
s_1_1_NewScaffoldedContig_1898	16037	2981	1528	1453	1538	442	249	710	997.979	1411.31	491	44	15.145	11.095	31.384
s_1_1_NewScaffoldedContig_1899	13909	3063	1549	1514	1850	490	165	493	1238.06	1605.77	676	59	18.852	8.897	39.14
s_1_1_NewScaffoldedContig_1900	8354	770	370	400	344	152	89	169	672.291	1088.81	145	47	8.149	8.725	22.325
s_1_1_NewScaffoldedContig_1901	90113	9141	4507	4634	4930	1572	544	1918	1137.43	1559.18	1417	37	8.613	6.387	32.876
s_1_1_NewScaffoldedContig_1902	15078	1370	681	689	674	234	100	329	1083.72	1508.83	187	34	7.701	5.085	35.204
s_1_1_NewScaffoldedContig_1903	2300	1130	568	562	394	102	323	305	384.893	284.324	263	61	33.109	9.978	59.13
s_1_1_NewScaffoldedContig_1904	1484	692	368	324	186	48	242	209	334.118	26.057	158	56	31.932	8.879	54.582
s_1_1_NewScaffoldedContig_1905	52430	14722	7359	7363	9018	1972	503	3033	1367.22	1677.14	2980	88	22.481	10.071	42.075
s_1_1_NewScaffoldedContig_1906	2351	280	142	138	160	10	28	74	394.712	294.516	57	27	10.538	4.471	46.236
s_1_1_NewScaffoldedContig_1907	3234	293	144	149	100	46	56	90	456.46	410.596	44	30	6.993	7.089	26.438
s_1_1_NewScaffoldedContig_1908	27602	9646	4814	4832	5244	1112	1081	2085	1300.84	1595.81	2529	497	27.188	27.028	43.269
s_1_1_NewScaffoldedContig_1909	40837	13839	6928	6911	8546	1772	527	2781	1425.53	1686.04	2332	76	26.921	9.767	45.209
s_1_1_NewScaffoldedContig_1910	3041	1392	657	735	504	104	357	404	554.163	546.271	353	67	32.476	10.909	50.51
s_1_1_NewScaffoldedContig_1911	12298	2777	1479	1298	1202	528	330	692	590.416	696.138	598	59	17.145	16.195	29.281
s_1_1_NewScaffoldedContig_1912	11064	2879	1473	1406	1328	414	332	757	1113.82	1525.28	645	50	20.656	12.55	36.94
s_1_1_NewScaffoldedContig_1913	23655	1988	1015	973	1068	348	134	408	1072.97	1460.55	310	29	7.103	5.673	30.222
s_1_1_NewScaffoldedContig_1914	31645	2861	1433	1428	1462	422	247	690	1218.35	1611.81	440	29	7.295	6.435	28.052
s_1_1_NewScaffoldedContig_1915	65911	9683	4906	4777	5278	1792	393	2013	1169.46	1560.76	1828	49	12.681	9	30.904
s_1_1_NewScaffoldedContig_1916	8678	2401	1240	1161	1036	280	455	592	1095.44	1505.28	591	88	21.546	14.66	36.69
s_1_1_NewScaffoldedContig_1917	14001	2364	1160	1204	1384	340	161	420	1124.76	1418.64	401	42	14.252	6.727	37.426
s_1_1_NewScaffoldedContig_1918	3482	800	419	381	336	126	154	167	443.905	417.651	182	45	19.452	10.436	39.431
s_1_1_NewScaffoldedContig_1919	7025	1290	669	621	634	248	143	242	729.719	1089.44	249	35	15.845	5.887	38.206
s_1_1_NewScaffoldedContig_1920	6937	1905	934	971	824	252	367	441	580.483	715.228	405	47	21.806	8.272	42.814
s_1_1_NewScaffoldedContig_1921	25443	8418	4206	4212	4126	958	1144	2064	1291.18	1607.65	2285	1086	26.532	58.048	42.373
s_1_1_NewScaffoldedContig_1922	29336	8006	3967	4039	4860	1144	402	1472	1324.08	1643.92	1376	57	22.217	10.649	41.359
s_1_1_NewScaffoldedContig_1923	5902	1737	884	853	822	286	234	370	689.2	911.07	338	55	24.035	8.919	43.223
s_1_1_NewScaffoldedContig_1924	24845	3887	1936	1951	2076	642	268	824	1228.54	1599.05	537	47	13.213	9.302	33.375
s_1_1_NewScaffoldedContig_1925	49383	37796	18811	18985	22464	6502	1215	6887	1342.54	1694.2	9258	156	64.999	24.957	38.124
s_1_1_NewScaffoldedContig_1926	25319	6743	3365	3378	3928	1010	291	1398	1319	1656.63	1583	59	21.51	7.884	42.81
s_1_1_NewScaffoldedContig_1927	39844	8531	4285	4246	4684	1256	731	1729	1137.05	1549.55	1815	87	17.518	11.986	33.433
s_1_1_NewScaffoldedContig_1928	29950	3736	1835	1901	1896	564	327	882	1094.17	1530.9	713	44	10.461	10.215	24.284
s_1_1_NewScaffoldedContig_1929	688	15455	8221	7234	2416	1932	5823	5125	330.486	28.739	9753	2485	1641.08	610.56	56.25
s_1_1_NewScaffoldedContig_1930	67223	8290	4171	4119	3496	1442	1158	2030	988.13	1456.53	2219	455	10.442	19.366	24.808
s_1_1_NewScaffoldedContig_1931	10818	3653	1884	1769	2046	452	342	763	1051.23	1428.74	633	61	27.271	9.618	43.585
s_1_1_NewScaffoldedContig_1932	61282	13429	6670	6759	7600	2060	743	2781	1351.27	1686.65	2140	63	17.675	11.213	35.505
s_1_1_NewScaffoldedContig_1933	27960	4903	2446	2457	2856	878	152	933	1288.76	1640.11	741	52	14.803	7.671	37.006
s_1_1_NewScaffoldedContig_1934	67262	11151	5626	5525	6168	1778	657	2335	1231.71	1607.14	1973	69	13.904	9.699	32.476
s_1_1_NewScaffoldedContig_1935	7355	379	200	179	138	70	28	133	887.638	1417.47	77	22	4.444	5.093	20.489
s_1_1_NewScaffoldedContig_1936	2370	1945	589	1356	166	108	639	1004	334.578	29.123	582	567	45.995	109.518	40.549
s_1_1_NewScaffoldedContig_1937	5771	1148	588	560	508	222	172	224	695.854	961.801	215	49	16.983	9.056	37.117
s_1_1_NewScaffoldedContig_1938	7737	2148	1090	1058	890	298	371	567	1079.05	1448.18	578	275	20.94	19.42	40.287
s_1_1_NewScaffoldedContig_1939	28236	6153	3056	3097	3272	784	707	1294	1148.41	1560.66	1498	60	17.645	11.807	34.877
s_1_1_NewScaffoldedContig_1940	7457	1173	580	593	562	172	187	235	627.619	847.609	266	50	13.02	10.872	31.031
s_1_1_NewScaffoldedContig_1941	13458	3492	1739	1753	2150	552	194	547	1257.08	1596.09	520	61	21.384	9.043	41.247
s_1_1_NewScaffoldedContig_1942	24694	9509	4755	4754	6040	1110	385	1839	1546.43	1719.61	2015	70	29.255	10.021	48.271
s_1_1_NewScaffoldedContig_1943	12323	1396	706	690	694	312	95	277	855.464	1195.6	208	35	9.654	5.566	37.288
s_1_1_NewScaffoldedContig_1944	22143	6754	3370	3384	3686	812	594	1565	1278.65	1597.51	1465	68	23.426	13.495	40.677
s_1_1_NewScaffoldedContig_1945	4791	3232	1499	1733	456	142	1322	1286	519.649	628.046	1435	2263	48.915	226.801	33.187
s_1_1_NewScaffoldedContig_1946	31126	4578	2313	2265	2488	796	321	871	1079.2	1511.39	652	43	12.672	8.801	30.181
s_1_1_NewScaffoldedContig_1947	16841	2099	1023	1076	1078	368	247	350	961.872	1361.63	337	41	10.909	8.291	26.43
s_1_1_NewScaffoldedContig_1948	19722	3003	1522	1481	1580	526	216	607	997.324	1428.03	730	48	13.251	9.752	30.499
s_1_1_NewScaffoldedContig_1949	47467	8640	4326	4314	5090	1310	321	1763	1328.22	1648.85	1621	50	14.989	11.161	31.592
s_1_1_NewScaffoldedContig_1950	18967	1181	590	591	596	186	161	223	1058.56	1504.5	200	28	5.154	5.941	21.089
s_1_1_NewScaffoldedContig_1951	1361	175	93	82	72	28	39	33	325.972	33.508	20	25	10.865	4.182	41.073
s_1_1_NewScaffoldedContig_1952	3483	266	134	132	120	42	37	63	457.117	421.715	48	20	6.989	4.105	37.496
s_1_1_NewScaffoldedContig_1953	67570	16063	7990	8073	9444	2448	734	3186	1422.77	1725.62	2981	633	19.214	17.402	40.033
s_1_1_NewScaffoldedContig_1954	1489	661	328	333	200	36	218	200	329.55	26.228	171	60	32.358	12.216	50.974
s_1_1_NewScaffoldedContig_1955	9632	2910	1511	1399	880	240	853	909	799.936	1186.72	1180	650	22.891	55.097	25.986
s_1_1_NewScaffoldedContig_1956	38316	6999	3524	3475	3942	1222	336	1343	1257.4	1616.29	1450	57	15.527	9.424	35.547
s_1_1_NewScaffoldedContig_1957	2995	7624	3485	4139	2978	844	1377	2334	451.403	427.546	2244	333	197.077	62.883	45.275
s_1_1_NewScaffoldedContig_1958	32644	6143	3082	3061	3152	904	489	1507	1156.66	1566.49	1285	55	15.269	10.571	33.014
s_1_1_NewScaffoldedContig_1959	21408	1926	956	970	1030	314	90	455	1088.7	1506.63	265	29	7.518	5.55	33.287
s_1_1_NewScaffoldedContig_1960	18704	2122	1066	1056	982	432	211	444	964.114	1438.67	378	36	9.927	7.366	28.08
s_1_1_NewScaffoldedContig_1961	769	445	257	188	88	40	134	179	330.455	24.298	143	61	37.797	14.724	62.159
s_1_1_NewScaffoldedContig_1962	13257	4537	2261	2276	2618	604	395	864	1207.17	1553.64	804	52	26.936	8.353	46.134
s_1_1_NewScaffoldedContig_1963	14919	5064	2507	2557	2974	596	345	1084	1392.24	1648.32	1054	80	26.263	10.941	46.21
s_1_1_NewScaffoldedContig_1964	38462	9342	4703	4639	5910	1416	242	1590	1353.67	1686.56	2043	51	20.355	7.535	42.447
s_1_1_NewScaffoldedContig_1965	1846	184	92	92	98	22	30	30	335.592	26.157	32	23	9.053	4.207	43.987
s_1_1_NewScaffoldedContig_1966	3621	1971	879	1092	812	166	442	529	595.52	604.079	597	64	37.756	10.884	57.47
s_1_1_NewScaffoldedContig_1967	1839	719	363	356	248	62	240	161	332.274	25.88	136	58	30.101	12.787	48.94
s_1_1_NewScaffoldedContig_1968	13121	3273	1662	1611	1828	418	218	765	1297.28	1619.22	667	49	20.035	8.258	41.902
s_1_1_NewScaffoldedContig_1969	15800	4149	2074	2075	2264	678	237	907	1193.41	1538.68	840	163	21.581	13.529	38.38
s_1_1_NewScaffoldedContig_1970	478	75	30	45	0	0	33	41			43	24	6.933	7.755	34.937
s_1_1_NewScaffoldedContig_1971	55820	13965	7040	6925	8610	2074	482	2558	1400.47	1691.85	2529	57	20.542	9.622	40.688
s_1_1_NewScaffoldedContig_1972	4447	2381	1144	1237	972	196	517	664	759.088	776.59	647	63	34.702	10.914	62.537
s_1_1_NewScaffoldedContig_1973	21069	6393	3239	3154	3582	812	547	1379	1192.09	1518.96	1705	118	24.329	14.066	38.773
s_1_1_NewScaffoldedContig_1974	46622	12175	6106	6069	7604	1726	348	2263	1299.94	1626.89	2436	75	21.686	9.541	39.801
s_1_1_NewScaffoldedContig_1975	1561	406	168	238	128	44	112	116	338.125	26.257	87	49	19.876	8.422	50.224
s_1_1_NewScaffoldedContig_1976	8197	4372	2223	2149	2560	460	321	981	1266.27	1470.07	718	70	39.264	10.304	52.458
s_1_1_NewScaffoldedContig_1977	24453	2692	1322	1370	1168	336	444	696	1218.09	1630.74	691	524	8.447	20.825	30.937
s_1_1_NewScaffoldedContig_1978	1055	1064	449	615	242	52	287	477	335.364	26.851	238	113	64.195	22.853	58.863
s_1_1_NewScaffoldedContig_1979	3919	1915	1007	908	710	190	508	480	584.592	603.916	380	140	34.945	15.566	49.502
s_1_1_NewScaffoldedContig_1980	2805	708	345	363	250	88	198	163	504.432	501.033	118	43	19.15	8.208	41.604
s_1_1_NewScaffoldedContig_1981	18141	3511	1772	1739	1964	594	243	646	1204.71	1607.85	715	54	16.349	9.968	34.105
s_1_1_NewScaffoldedContig_1982	8995	1006	511	495	492	184	119	197	750.354	1174.12	231	36	9.63	8.681	26.159
s_1_1_NewScaffoldedContig_1983	4034	614	305	309	250	112	109	128	410.768	320.245	133	33	13.236	6.404	34.482
s_1_1_NewScaffoldedContig_1984	9775	2122	1055	1067	870	212	312	703	919.386	1135.41	410	61	15.86	16.65	27.826
s_1_1_NewScaffoldedContig_1985	5758	2441	1230	1211	814	210	664	724	513.012	512.208	718	371	31.071	31.558	47.638
s_1_1_NewScaffoldedContig_1986	4136	843	427	416	330	148	143	206	516.388	536.48	173	44	17.179	7.272	38.177
s_1_1_NewScaffoldedContig_1987	13039	4570	2340	2230	2540	580	344	1056	1272.13	1556.97	965	68	26.371	13.154	45.287
s_1_1_NewScaffoldedContig_1988	7329	5923	2918	3005	2848	394	964	1658	1387.54	1618.39	1020	125	54.692	21.904	53.909
s_1_1_NewScaffoldedContig_1989	22080	7896	3942	3954	4930	994	314	1566	1254.81	1558.56	1800	60	28.372	9.932	47.428
s_1_1_NewScaffoldedContig_1990	14864	2698	1353	1345	1404	458	204	582	1055.17	1508.65	724	45	15.719	7.984	36.027
s_1_1_NewScaffoldedContig_1991	29038	8407	4133	4274	5156	1318	284	1524	1393.45	1697.28	1880	63	23.57	8.533	42.699
s_1_1_NewScaffoldedContig_1992	3326	1570	781	789	576	130	398	451	527.184	531.452	358	57	30.617	8.886	62.026
s_1_1_NewScaffoldedContig_1993	24453	7518	3845	3673	3414	898	1115	1974	1218.45	1570.57	2566	793	23.84	42.952	39.373
s_1_1_NewScaffoldedContig_1994	5579	6489	3780	2709	32	42	1850	4500	330.125	36.527	5092	1703	51.005	228.033	11.023
s_1_1_NewScaffoldedContig_1995	12740	2659	1319	1340	1252	372	391	613	829.899	1222.88	448	51	16.971	12.018	31.554
s_1_1_NewScaffoldedContig_1996	4416	951	490	461	348	236	187	162	341.155	118.046	160	41	18.083	7.879	40.082
s_1_1_NewScaffoldedContig_1997	2688	41184	20479	20705	2474	2230	15855	20298	323.528	30.026	16098	5539	1003.35	1681.71	20.424
s_1_1_NewScaffoldedContig_1998	2472	345	192	153	156	36	74	72	441.756	422.291	58	27	11.919	4.832	43.487
s_1_1_NewScaffoldedContig_1999	3746	1443	660	783	542	132	394	363	626.535	634.753	322	48	27.562	8.877	49.092
[truncated: 190,796 more rows]

## Sheet: Summary
SMACv1.1	Scaffolded	de novo	Contig	Stats
Contig Set	Contig Count	Min Contig Length (bp)	Max Contig Length (bp)	Mean Contig Length (bp)	Total Contig Length (bp)
N25	6956	29533	177843	43,313.57	301289178
N50	21033	15968	177843	28,647.65	602546123
N75	49621	6711	177843	18,214.08	903800890
All contigs	192790	269	177843	6,250.64	1205061819
Long contigs (> 10Kb)	35960	10000	177843	22,011.90	791547749
Short contigs (< 300bp)*	3	269	299	280.00	840
*Note, the mapping back process causes some contigs to be shorter than the specified minimum distance provided at the onset of assembly.
*These contigs are obviously not well supported and were also eliminated by NCBI.
