# Supplementary material for: A Multi-Platform Draft de novo Genome Assembly and Comparative Analysis for the Scarlet Macaw (Ara macao)
Source: PLoS One. 2013 May 8;8(5):e62415. doi: 10.1371/journal.pone.0062415 (PMC3648530; doi:10.1371/journal.pone.0062415)
Supplement: Table S3 — Scarlet macaw simple de novo contig positions in the scaffolded assembly. (XLSX) [file pone.0062415.s004.xlsx]

## Sheet: TableS3-A
Table S3-A Large Gap	Read Mapping Step One Results
SMACv1.0 de novo Contig	SMACv1.1 Scaffolded de novo Contig	Start Position in Scaffold
s_1_1_contig250384	s_1_1NewScaffoldedcontig_1	11
s_1_1_contig91285	s_1_1NewScaffoldedcontig_2	33
s_1_1_contig56087	s_1_1NewScaffoldedcontig_2	6512
s_1_1_contig16913	s_1_1NewScaffoldedcontig_2	11186
s_1_1_contig193423	s_1_1NewScaffoldedcontig_2	24282
s_1_1_contig114991	s_1_1NewScaffoldedcontig_2	26352
s_1_1_contig108579	s_1_1NewScaffoldedcontig_2	29986
s_1_1_contig187168	s_1_1NewScaffoldedcontig_2	35281
s_1_1_contig111960	s_1_1NewScaffoldedcontig_3	1
s_1_1_contig19431	s_1_1NewScaffoldedcontig_3	8010
s_1_1_contig226178	s_1_1NewScaffoldedcontig_3	8841
s_1_1_contig74812	s_1_1NewScaffoldedcontig_4	126
s_1_1_contig157893	s_1_1NewScaffoldedcontig_5	18482
s_1_1_contig4700	s_1_1NewScaffoldedcontig_5	22780
s_1_1_contig123025	s_1_1NewScaffoldedcontig_5	24414
s_1_1_contig9232	s_1_1NewScaffoldedcontig_5	30641
s_1_1_contig223433	s_1_1NewScaffoldedcontig_5	47086
s_1_1_contig119853	s_1_1NewScaffoldedcontig_6	38777
s_1_1_contig181118	s_1_1NewScaffoldedcontig_7	1
s_1_1_contig55187	s_1_1NewScaffoldedcontig_7	3360
s_1_1_contig221569	s_1_1NewScaffoldedcontig_7	10704
s_1_1_contig157850	s_1_1NewScaffoldedcontig_10	41
s_1_1_contig109113	s_1_1NewScaffoldedcontig_10	7931
s_1_1_contig211161	s_1_1NewScaffoldedcontig_11	4020
s_1_1_contig94018	s_1_1NewScaffoldedcontig_12	45701
s_1_1_contig1713	s_1_1NewScaffoldedcontig_14	22216
s_1_1_contig225991	s_1_1NewScaffoldedcontig_14	22216
s_1_1_contig281385	s_1_1NewScaffoldedcontig_15	1680
s_1_1_contig280521	s_1_1NewScaffoldedcontig_15	6083
s_1_1_contig123355	s_1_1NewScaffoldedcontig_16	34
s_1_1_contig182321	s_1_1NewScaffoldedcontig_16	5386
s_1_1_contig4197	s_1_1NewScaffoldedcontig_17	1
s_1_1_contig265722	s_1_1NewScaffoldedcontig_18	1
s_1_1_contig117686	s_1_1NewScaffoldedcontig_19	1
s_1_1_contig26570	s_1_1NewScaffoldedcontig_19	3942
s_1_1_contig128853	s_1_1NewScaffoldedcontig_24	15770
s_1_1_contig106407	s_1_1NewScaffoldedcontig_24	20163
s_1_1_contig8323	s_1_1NewScaffoldedcontig_24	25069
s_1_1_contig180245	s_1_1NewScaffoldedcontig_24	28265
s_1_1_contig54917	s_1_1NewScaffoldedcontig_25	1089
s_1_1_contig173165	s_1_1NewScaffoldedcontig_25	7722
s_1_1_contig90972	s_1_1NewScaffoldedcontig_25	8525
s_1_1_contig6216	s_1_1NewScaffoldedcontig_26	1
s_1_1_contig128379	s_1_1NewScaffoldedcontig_27	960
s_1_1_contig231398	s_1_1NewScaffoldedcontig_27	6480
s_1_1_contig174988	s_1_1NewScaffoldedcontig_28	1
s_1_1_contig1767	s_1_1NewScaffoldedcontig_28	1830
s_1_1_contig170669	s_1_1NewScaffoldedcontig_28	2165
s_1_1_contig55558	s_1_1NewScaffoldedcontig_28	2991
s_1_1_contig181612	s_1_1NewScaffoldedcontig_28	10915
s_1_1_contig196059	s_1_1NewScaffoldedcontig_28	12315
s_1_1_contig193284	s_1_1NewScaffoldedcontig_28	13997
s_1_1_contig33217	s_1_1NewScaffoldedcontig_28	16013
s_1_1_contig18395	s_1_1NewScaffoldedcontig_28	29740
s_1_1_contig191323	s_1_1NewScaffoldedcontig_28	31370
s_1_1_contig176271	s_1_1NewScaffoldedcontig_28	32278
s_1_1_contig9805	s_1_1NewScaffoldedcontig_28	34118
s_1_1_contig187680	s_1_1NewScaffoldedcontig_28	36305
s_1_1_contig270366	s_1_1NewScaffoldedcontig_30	1
s_1_1_contig195381	s_1_1NewScaffoldedcontig_31	1
s_1_1_contig54657	s_1_1NewScaffoldedcontig_31	4416
s_1_1_contig159844	s_1_1NewScaffoldedcontig_31	12219
s_1_1_contig214523	s_1_1NewScaffoldedcontig_34	895
s_1_1_contig245012	s_1_1NewScaffoldedcontig_35	1
s_1_1_contig214041	s_1_1NewScaffoldedcontig_35	851
s_1_1_contig159607	s_1_1NewScaffoldedcontig_36	10554
s_1_1_contig122789	s_1_1NewScaffoldedcontig_36	43012
s_1_1_contig66490	s_1_1NewScaffoldedcontig_38	1
s_1_1_contig276245	s_1_1NewScaffoldedcontig_39	235
s_1_1_contig219728	s_1_1NewScaffoldedcontig_40	1
s_1_1_contig197088	s_1_1NewScaffoldedcontig_40	3686
s_1_1_contig210081	s_1_1NewScaffoldedcontig_40	4365
s_1_1_contig27979	s_1_1NewScaffoldedcontig_40	26885
s_1_1_contig4305	s_1_1NewScaffoldedcontig_40	28171
s_1_1_contig160456	s_1_1NewScaffoldedcontig_40	29780
s_1_1_contig92488	s_1_1NewScaffoldedcontig_41	1078
s_1_1_contig253559	s_1_1NewScaffoldedcontig_41	6580
s_1_1_contig234104	s_1_1NewScaffoldedcontig_41	8636
s_1_1_contig131068	s_1_1NewScaffoldedcontig_41	9674
s_1_1_contig122813	s_1_1NewScaffoldedcontig_41	12215
s_1_1_contig155953	s_1_1NewScaffoldedcontig_41	19100
s_1_1_contig147995	s_1_1NewScaffoldedcontig_41	25642
s_1_1_contig214169	s_1_1NewScaffoldedcontig_41	30671
s_1_1_contig191639	s_1_1NewScaffoldedcontig_41	44663
s_1_1_contig120726	s_1_1NewScaffoldedcontig_41	46430
s_1_1_contig149825	s_1_1NewScaffoldedcontig_45	2120
s_1_1_contig130669	s_1_1NewScaffoldedcontig_45	7007
s_1_1_contig73115	s_1_1NewScaffoldedcontig_45	9533
s_1_1_contig178026	s_1_1NewScaffoldedcontig_47	3710
s_1_1_contig98007	s_1_1NewScaffoldedcontig_47	13021
s_1_1_contig197723	s_1_1NewScaffoldedcontig_47	46042
s_1_1_contig231526	s_1_1NewScaffoldedcontig_47	46931
s_1_1_contig171803	s_1_1NewScaffoldedcontig_47	48577
s_1_1_contig167178	s_1_1NewScaffoldedcontig_47	50131
s_1_1_contig178098	s_1_1NewScaffoldedcontig_47	52002
s_1_1_contig120251	s_1_1NewScaffoldedcontig_47	54476
s_1_1_contig137115	s_1_1NewScaffoldedcontig_47	59559
s_1_1_contig217246	s_1_1NewScaffoldedcontig_47	62908
s_1_1_contig164026	s_1_1NewScaffoldedcontig_47	66310
s_1_1_contig272174	s_1_1NewScaffoldedcontig_47	72637
s_1_1_contig7582	s_1_1NewScaffoldedcontig_47	74014
s_1_1_contig277196	s_1_1NewScaffoldedcontig_47	80435
s_1_1_contig165295	s_1_1NewScaffoldedcontig_48	1
s_1_1_contig204471	s_1_1NewScaffoldedcontig_48	4278
s_1_1_contig188503	s_1_1NewScaffoldedcontig_48	7468
s_1_1_contig133538	s_1_1NewScaffoldedcontig_48	9120
s_1_1_contig29887	s_1_1NewScaffoldedcontig_49	1
s_1_1_contig118963	s_1_1NewScaffoldedcontig_49	1007
s_1_1_contig124239	s_1_1NewScaffoldedcontig_49	4418
s_1_1_contig123168	s_1_1NewScaffoldedcontig_49	10992
s_1_1_contig127228	s_1_1NewScaffoldedcontig_49	14568
s_1_1_contig249610	s_1_1NewScaffoldedcontig_50	4826
s_1_1_contig161127	s_1_1NewScaffoldedcontig_51	168
s_1_1_contig105977	s_1_1NewScaffoldedcontig_51	4737
s_1_1_contig79333	s_1_1NewScaffoldedcontig_51	12327
s_1_1_contig146884	s_1_1NewScaffoldedcontig_51	19718
s_1_1_contig236658	s_1_1NewScaffoldedcontig_51	22638
s_1_1_contig282857	s_1_1NewScaffoldedcontig_51	26113
s_1_1_contig59193	s_1_1NewScaffoldedcontig_51	27154
s_1_1_contig232618	s_1_1NewScaffoldedcontig_51	29709
s_1_1_contig125087	s_1_1NewScaffoldedcontig_51	33042
s_1_1_contig204671	s_1_1NewScaffoldedcontig_51	36701
s_1_1_contig80446	s_1_1NewScaffoldedcontig_51	38482
s_1_1_contig40773	s_1_1NewScaffoldedcontig_51	43342
s_1_1_contig194246	s_1_1NewScaffoldedcontig_52	1
s_1_1_contig157795	s_1_1NewScaffoldedcontig_56	1
s_1_1_contig87086	s_1_1NewScaffoldedcontig_56	8851
s_1_1_contig157450	s_1_1NewScaffoldedcontig_56	27104
s_1_1_contig208526	s_1_1NewScaffoldedcontig_57	1
s_1_1_contig24684	s_1_1NewScaffoldedcontig_57	2183
s_1_1_contig117113	s_1_1NewScaffoldedcontig_57	4080
s_1_1_contig129352	s_1_1NewScaffoldedcontig_57	9369
s_1_1_contig8647	s_1_1NewScaffoldedcontig_57	17405
s_1_1_contig144212	s_1_1NewScaffoldedcontig_57	20378
s_1_1_contig272751	s_1_1NewScaffoldedcontig_57	23119
s_1_1_contig261683	s_1_1NewScaffoldedcontig_57	25403
s_1_1_contig181785	s_1_1NewScaffoldedcontig_58	1
s_1_1_contig107076	s_1_1NewScaffoldedcontig_59	4817
s_1_1_contig205037	s_1_1NewScaffoldedcontig_59	9989
s_1_1_contig61746	s_1_1NewScaffoldedcontig_59	15163
s_1_1_contig120068	s_1_1NewScaffoldedcontig_59	21429
s_1_1_contig126163	s_1_1NewScaffoldedcontig_59	28138
s_1_1_contig109841	s_1_1NewScaffoldedcontig_59	33922
s_1_1_contig114606	s_1_1NewScaffoldedcontig_60	3211
s_1_1_contig181892	s_1_1NewScaffoldedcontig_60	8795
s_1_1_contig105353	s_1_1NewScaffoldedcontig_60	13693
s_1_1_contig52762	s_1_1NewScaffoldedcontig_60	19688
s_1_1_contig65963	s_1_1NewScaffoldedcontig_60	21549
s_1_1_contig198535	s_1_1NewScaffoldedcontig_60	29218
s_1_1_contig253200	s_1_1NewScaffoldedcontig_61	1354
s_1_1_contig254261	s_1_1NewScaffoldedcontig_61	1446
s_1_1_contig257686	s_1_1NewScaffoldedcontig_61	2121
s_1_1_contig258196	s_1_1NewScaffoldedcontig_61	2121
s_1_1_contig212028	s_1_1NewScaffoldedcontig_61	2121
s_1_1_contig281381	s_1_1NewScaffoldedcontig_61	2122
s_1_1_contig256962	s_1_1NewScaffoldedcontig_61	2152
s_1_1_contig253949	s_1_1NewScaffoldedcontig_61	2158
s_1_1_contig255536	s_1_1NewScaffoldedcontig_61	2163
s_1_1_contig255393	s_1_1NewScaffoldedcontig_61	2197
s_1_1_contig245841	s_1_1NewScaffoldedcontig_63	1
s_1_1_contig279811	s_1_1NewScaffoldedcontig_64	1
s_1_1_contig63992	s_1_1NewScaffoldedcontig_65	222
s_1_1_contig24629	s_1_1NewScaffoldedcontig_65	6382
s_1_1_contig234986	s_1_1NewScaffoldedcontig_65	8119
s_1_1_contig119515	s_1_1NewScaffoldedcontig_65	9741
s_1_1_contig110963	s_1_1NewScaffoldedcontig_66	326
s_1_1_contig181256	s_1_1NewScaffoldedcontig_66	4638
s_1_1_contig277191	s_1_1NewScaffoldedcontig_66	17232
s_1_1_contig172035	s_1_1NewScaffoldedcontig_66	17852
s_1_1_contig32281	s_1_1NewScaffoldedcontig_66	19554
s_1_1_contig118171	s_1_1NewScaffoldedcontig_67	1
s_1_1_contig104285	s_1_1NewScaffoldedcontig_67	4269
s_1_1_contig217627	s_1_1NewScaffoldedcontig_67	6677
s_1_1_contig168159	s_1_1NewScaffoldedcontig_67	12996
s_1_1_contig79321	s_1_1NewScaffoldedcontig_67	24856
s_1_1_contig235236	s_1_1NewScaffoldedcontig_67	28764
s_1_1_contig130675	s_1_1NewScaffoldedcontig_68	1
s_1_1_contig25242	s_1_1NewScaffoldedcontig_68	4830
s_1_1_contig172066	s_1_1NewScaffoldedcontig_68	6498
s_1_1_contig5034	s_1_1NewScaffoldedcontig_68	10248
s_1_1_contig104043	s_1_1NewScaffoldedcontig_68	11471
s_1_1_contig124883	s_1_1NewScaffoldedcontig_68	18203
s_1_1_contig95794	s_1_1NewScaffoldedcontig_68	29945
s_1_1_contig84982	s_1_1NewScaffoldedcontig_68	33065
s_1_1_contig165108	s_1_1NewScaffoldedcontig_68	36743
s_1_1_contig238637	s_1_1NewScaffoldedcontig_69	197
s_1_1_contig46517	s_1_1NewScaffoldedcontig_69	20794
s_1_1_contig232922	s_1_1NewScaffoldedcontig_70	1668
s_1_1_contig200963	s_1_1NewScaffoldedcontig_70	4203
s_1_1_contig141899	s_1_1NewScaffoldedcontig_70	5814
s_1_1_contig22986	s_1_1NewScaffoldedcontig_70	8096
s_1_1_contig208725	s_1_1NewScaffoldedcontig_71	498
s_1_1_contig145783	s_1_1NewScaffoldedcontig_71	1897
s_1_1_contig35461	s_1_1NewScaffoldedcontig_72	11412
s_1_1_contig92827	s_1_1NewScaffoldedcontig_72	12084
s_1_1_contig126739	s_1_1NewScaffoldedcontig_72	18842
s_1_1_contig53507	s_1_1NewScaffoldedcontig_72	23467
s_1_1_contig100407	s_1_1NewScaffoldedcontig_72	28231
s_1_1_contig107937	s_1_1NewScaffoldedcontig_73	1
s_1_1_contig226282	s_1_1NewScaffoldedcontig_73	6934
s_1_1_contig52868	s_1_1NewScaffoldedcontig_75	1
s_1_1_contig99037	s_1_1NewScaffoldedcontig_75	21325
s_1_1_contig183745	s_1_1NewScaffoldedcontig_75	29300
s_1_1_contig114833	s_1_1NewScaffoldedcontig_75	31144
s_1_1_contig185312	s_1_1NewScaffoldedcontig_75	37665
s_1_1_contig95968	s_1_1NewScaffoldedcontig_76	13
s_1_1_contig222599	s_1_1NewScaffoldedcontig_76	6142
s_1_1_contig164467	s_1_1NewScaffoldedcontig_77	1
s_1_1_contig106186	s_1_1NewScaffoldedcontig_77	1968
s_1_1_contig160329	s_1_1NewScaffoldedcontig_77	8588
s_1_1_contig209223	s_1_1NewScaffoldedcontig_77	12968
s_1_1_contig230268	s_1_1NewScaffoldedcontig_77	13853
s_1_1_contig12245	s_1_1NewScaffoldedcontig_77	17464
s_1_1_contig22787	s_1_1NewScaffoldedcontig_77	19480
s_1_1_contig112214	s_1_1NewScaffoldedcontig_78	2091
s_1_1_contig189972	s_1_1NewScaffoldedcontig_78	4907
s_1_1_contig230170	s_1_1NewScaffoldedcontig_78	35974
s_1_1_contig135105	s_1_1NewScaffoldedcontig_80	223
s_1_1_contig151701	s_1_1NewScaffoldedcontig_80	3035
s_1_1_contig160793	s_1_1NewScaffoldedcontig_80	25852
s_1_1_contig10868	s_1_1NewScaffoldedcontig_82	11223
s_1_1_contig129703	s_1_1NewScaffoldedcontig_86	2195
s_1_1_contig119330	s_1_1NewScaffoldedcontig_86	5707
s_1_1_contig180424	s_1_1NewScaffoldedcontig_86	8382
s_1_1_contig230235	s_1_1NewScaffoldedcontig_87	33504
s_1_1_contig157812	s_1_1NewScaffoldedcontig_88	13617
s_1_1_contig142556	s_1_1NewScaffoldedcontig_90	1
s_1_1_contig98088	s_1_1NewScaffoldedcontig_90	56125
s_1_1_contig145707	s_1_1NewScaffoldedcontig_90	62715
s_1_1_contig119962	s_1_1NewScaffoldedcontig_90	64502
s_1_1_contig71755	s_1_1NewScaffoldedcontig_90	68613
s_1_1_contig279439	s_1_1NewScaffoldedcontig_90	76675
s_1_1_contig167870	s_1_1NewScaffoldedcontig_93	3457
s_1_1_contig254624	s_1_1NewScaffoldedcontig_93	8328
s_1_1_contig94556	s_1_1NewScaffoldedcontig_93	8683
s_1_1_contig264549	s_1_1NewScaffoldedcontig_95	6807
s_1_1_contig229499	s_1_1NewScaffoldedcontig_95	8731
s_1_1_contig199689	s_1_1NewScaffoldedcontig_95	10195
s_1_1_contig63977	s_1_1NewScaffoldedcontig_95	13405
s_1_1_contig220349	s_1_1NewScaffoldedcontig_95	21039
s_1_1_contig218556	s_1_1NewScaffoldedcontig_96	6003
s_1_1_contig263776	s_1_1NewScaffoldedcontig_97	24484
s_1_1_contig66209	s_1_1NewScaffoldedcontig_100	1
s_1_1_contig158700	s_1_1NewScaffoldedcontig_101	3401
s_1_1_contig215293	s_1_1NewScaffoldedcontig_102	20507
s_1_1_contig184002	s_1_1NewScaffoldedcontig_103	1
s_1_1_contig167081	s_1_1NewScaffoldedcontig_104	1
s_1_1_contig194065	s_1_1NewScaffoldedcontig_105	37910
s_1_1_contig122532	s_1_1NewScaffoldedcontig_106	13719
s_1_1_contig160512	s_1_1NewScaffoldedcontig_107	1
s_1_1_contig230174	s_1_1NewScaffoldedcontig_108	26944
s_1_1_contig121775	s_1_1NewScaffoldedcontig_108	43079
s_1_1_contig106703	s_1_1NewScaffoldedcontig_108	49836
s_1_1_contig216960	s_1_1NewScaffoldedcontig_109	1
s_1_1_contig219356	s_1_1NewScaffoldedcontig_110	1
s_1_1_contig129155	s_1_1NewScaffoldedcontig_110	10540
s_1_1_contig117476	s_1_1NewScaffoldedcontig_110	16830
s_1_1_contig172583	s_1_1NewScaffoldedcontig_111	7055
s_1_1_contig182758	s_1_1NewScaffoldedcontig_111	9421
s_1_1_contig4936	s_1_1NewScaffoldedcontig_111	11649
s_1_1_contig110770	s_1_1NewScaffoldedcontig_111	15953
s_1_1_contig213017	s_1_1NewScaffoldedcontig_112	1
s_1_1_contig222411	s_1_1NewScaffoldedcontig_113	1
s_1_1_contig252855	s_1_1NewScaffoldedcontig_114	120
s_1_1_contig153683	s_1_1NewScaffoldedcontig_115	1
s_1_1_contig98072	s_1_1NewScaffoldedcontig_115	6294
s_1_1_contig23336	s_1_1NewScaffoldedcontig_115	29807
s_1_1_contig128137	s_1_1NewScaffoldedcontig_117	224
s_1_1_contig6268	s_1_1NewScaffoldedcontig_117	39393
s_1_1_contig88086	s_1_1NewScaffoldedcontig_117	65364
s_1_1_contig162725	s_1_1NewScaffoldedcontig_117	70066
s_1_1_contig225188	s_1_1NewScaffoldedcontig_117	74178
s_1_1_contig103622	s_1_1NewScaffoldedcontig_117	77995
s_1_1_contig142927	s_1_1NewScaffoldedcontig_118	73
s_1_1_contig212052	s_1_1NewScaffoldedcontig_119	1
s_1_1_contig197506	s_1_1NewScaffoldedcontig_120	275
s_1_1_contig141057	s_1_1NewScaffoldedcontig_120	1110
s_1_1_contig265803	s_1_1NewScaffoldedcontig_120	3497
s_1_1_contig10030	s_1_1NewScaffoldedcontig_120	5090
s_1_1_contig131423	s_1_1NewScaffoldedcontig_120	15393
s_1_1_contig1525	s_1_1NewScaffoldedcontig_121	1
s_1_1_contig35928	s_1_1NewScaffoldedcontig_121	4700
s_1_1_contig65473	s_1_1NewScaffoldedcontig_123	1046
s_1_1_contig134688	s_1_1NewScaffoldedcontig_124	335
s_1_1_contig102146	s_1_1NewScaffoldedcontig_124	36053
s_1_1_contig193481	s_1_1NewScaffoldedcontig_125	1
s_1_1_contig93029	s_1_1NewScaffoldedcontig_125	15624
s_1_1_contig115231	s_1_1NewScaffoldedcontig_127	1
s_1_1_contig264089	s_1_1NewScaffoldedcontig_127	5158
s_1_1_contig54774	s_1_1NewScaffoldedcontig_127	10171
s_1_1_contig37056	s_1_1NewScaffoldedcontig_127	16756
s_1_1_contig278724	s_1_1NewScaffoldedcontig_127	17235
s_1_1_contig125267	s_1_1NewScaffoldedcontig_127	17850
s_1_1_contig269347	s_1_1NewScaffoldedcontig_127	20814
s_1_1_contig50208	s_1_1NewScaffoldedcontig_127	23960
s_1_1_contig267668	s_1_1NewScaffoldedcontig_129	1
s_1_1_contig231774	s_1_1NewScaffoldedcontig_129	51947
s_1_1_contig253877	s_1_1NewScaffoldedcontig_130	1
s_1_1_contig185178	s_1_1NewScaffoldedcontig_131	318
s_1_1_contig115935	s_1_1NewScaffoldedcontig_133	1
s_1_1_contig156747	s_1_1NewScaffoldedcontig_133	4727
s_1_1_contig161241	s_1_1NewScaffoldedcontig_133	27531
s_1_1_contig233273	s_1_1NewScaffoldedcontig_135	1
s_1_1_contig67258	s_1_1NewScaffoldedcontig_135	13404
s_1_1_contig205348	s_1_1NewScaffoldedcontig_135	21574
s_1_1_contig72958	s_1_1NewScaffoldedcontig_136	1
s_1_1_contig66566	s_1_1NewScaffoldedcontig_137	1793
s_1_1_contig70329	s_1_1NewScaffoldedcontig_137	7791
s_1_1_contig211553	s_1_1NewScaffoldedcontig_138	1
s_1_1_contig14127	s_1_1NewScaffoldedcontig_138	1146
s_1_1_contig9468	s_1_1NewScaffoldedcontig_138	3264
s_1_1_contig164025	s_1_1NewScaffoldedcontig_138	15317
s_1_1_contig223716	s_1_1NewScaffoldedcontig_140	16936
s_1_1_contig219690	s_1_1NewScaffoldedcontig_140	19475
s_1_1_contig217165	s_1_1NewScaffoldedcontig_140	29944
s_1_1_contig142356	s_1_1NewScaffoldedcontig_140	32947
s_1_1_contig57441	s_1_1NewScaffoldedcontig_140	36297
s_1_1_contig97887	s_1_1NewScaffoldedcontig_140	42878
s_1_1_contig277043	s_1_1NewScaffoldedcontig_140	64554
s_1_1_contig256204	s_1_1NewScaffoldedcontig_140	65798
s_1_1_contig257450	s_1_1NewScaffoldedcontig_140	65832
s_1_1_contig253899	s_1_1NewScaffoldedcontig_140	65879
s_1_1_contig206937	s_1_1NewScaffoldedcontig_140	65961
s_1_1_contig258411	s_1_1NewScaffoldedcontig_140	66010
s_1_1_contig213318	s_1_1NewScaffoldedcontig_140	66018
s_1_1_contig97361	s_1_1NewScaffoldedcontig_140	66342
s_1_1_contig195321	s_1_1NewScaffoldedcontig_141	7492
s_1_1_contig243828	s_1_1NewScaffoldedcontig_141	11421
s_1_1_contig169526	s_1_1NewScaffoldedcontig_142	1
s_1_1_contig166035	s_1_1NewScaffoldedcontig_142	1952
s_1_1_contig85723	s_1_1NewScaffoldedcontig_144	2252
s_1_1_contig266220	s_1_1NewScaffoldedcontig_144	15253
s_1_1_contig245813	s_1_1NewScaffoldedcontig_145	1
s_1_1_contig56806	s_1_1NewScaffoldedcontig_145	4741
s_1_1_contig31771	s_1_1NewScaffoldedcontig_145	11141
s_1_1_contig254658	s_1_1NewScaffoldedcontig_146	88
s_1_1_contig32728	s_1_1NewScaffoldedcontig_147	5448
s_1_1_contig119650	s_1_1NewScaffoldedcontig_147	6072
s_1_1_contig278002	s_1_1NewScaffoldedcontig_147	11516
s_1_1_contig74024	s_1_1NewScaffoldedcontig_147	11973
s_1_1_contig185332	s_1_1NewScaffoldedcontig_148	1127
s_1_1_contig205147	s_1_1NewScaffoldedcontig_149	1
s_1_1_contig15368	s_1_1NewScaffoldedcontig_149	25435
s_1_1_contig146040	s_1_1NewScaffoldedcontig_150	1641
s_1_1_contig250962	s_1_1NewScaffoldedcontig_150	5410
s_1_1_contig10179	s_1_1NewScaffoldedcontig_150	5790
s_1_1_contig133399	s_1_1NewScaffoldedcontig_150	13098
s_1_1_contig234526	s_1_1NewScaffoldedcontig_150	26241
s_1_1_contig97534	s_1_1NewScaffoldedcontig_150	30584
s_1_1_contig87044	s_1_1NewScaffoldedcontig_151	9046
s_1_1_contig182076	s_1_1NewScaffoldedcontig_151	35059
s_1_1_contig94675	s_1_1NewScaffoldedcontig_151	38574
s_1_1_contig155066	s_1_1NewScaffoldedcontig_151	46008
s_1_1_contig47698	s_1_1NewScaffoldedcontig_152	1
s_1_1_contig101183	s_1_1NewScaffoldedcontig_152	1138
s_1_1_contig1521	s_1_1NewScaffoldedcontig_152	6818
s_1_1_contig219159	s_1_1NewScaffoldedcontig_152	7645
s_1_1_contig108506	s_1_1NewScaffoldedcontig_154	1
s_1_1_contig264620	s_1_1NewScaffoldedcontig_155	1
s_1_1_contig199371	s_1_1NewScaffoldedcontig_155	11063
s_1_1_contig152162	s_1_1NewScaffoldedcontig_156	70
s_1_1_contig17281	s_1_1NewScaffoldedcontig_156	3465
s_1_1_contig119722	s_1_1NewScaffoldedcontig_156	10751
s_1_1_contig213789	s_1_1NewScaffoldedcontig_156	14677
s_1_1_contig149053	s_1_1NewScaffoldedcontig_157	126
s_1_1_contig44786	s_1_1NewScaffoldedcontig_159	1
s_1_1_contig202333	s_1_1NewScaffoldedcontig_160	1
s_1_1_contig24716	s_1_1NewScaffoldedcontig_160	561
s_1_1_contig103957	s_1_1NewScaffoldedcontig_160	11729
s_1_1_contig86824	s_1_1NewScaffoldedcontig_161	12589
s_1_1_contig93396	s_1_1NewScaffoldedcontig_161	33766
s_1_1_contig100318	s_1_1NewScaffoldedcontig_162	13200
s_1_1_contig147799	s_1_1NewScaffoldedcontig_164	1
s_1_1_contig109682	s_1_1NewScaffoldedcontig_165	1
s_1_1_contig109866	s_1_1NewScaffoldedcontig_165	3358
s_1_1_contig181020	s_1_1NewScaffoldedcontig_166	10744
s_1_1_contig211655	s_1_1NewScaffoldedcontig_167	7446
s_1_1_contig252724	s_1_1NewScaffoldedcontig_167	7450
s_1_1_contig282269	s_1_1NewScaffoldedcontig_167	7772
s_1_1_contig214697	s_1_1NewScaffoldedcontig_167	13753
s_1_1_contig139434	s_1_1NewScaffoldedcontig_168	1
s_1_1_contig219233	s_1_1NewScaffoldedcontig_171	1
s_1_1_contig16972	s_1_1NewScaffoldedcontig_172	23184
s_1_1_contig231365	s_1_1NewScaffoldedcontig_174	60
s_1_1_contig224782	s_1_1NewScaffoldedcontig_175	984
s_1_1_contig223848	s_1_1NewScaffoldedcontig_175	2818
s_1_1_contig254970	s_1_1NewScaffoldedcontig_175	3965
s_1_1_contig181543	s_1_1NewScaffoldedcontig_175	4191
s_1_1_contig236986	s_1_1NewScaffoldedcontig_175	6653
s_1_1_contig228815	s_1_1NewScaffoldedcontig_176	6990
s_1_1_contig207414	s_1_1NewScaffoldedcontig_176	8907
s_1_1_contig37468	s_1_1NewScaffoldedcontig_176	10327
s_1_1_contig129302	s_1_1NewScaffoldedcontig_176	11846
s_1_1_contig140192	s_1_1NewScaffoldedcontig_176	17438
s_1_1_contig133907	s_1_1NewScaffoldedcontig_177	1
s_1_1_contig226947	s_1_1NewScaffoldedcontig_177	12789
s_1_1_contig275800	s_1_1NewScaffoldedcontig_177	17852
s_1_1_contig227718	s_1_1NewScaffoldedcontig_178	1
s_1_1_contig185871	s_1_1NewScaffoldedcontig_179	20
s_1_1_contig222476	s_1_1NewScaffoldedcontig_179	987
s_1_1_contig196635	s_1_1NewScaffoldedcontig_179	4621
s_1_1_contig183273	s_1_1NewScaffoldedcontig_179	10563
s_1_1_contig162826	s_1_1NewScaffoldedcontig_179	14535
s_1_1_contig46573	s_1_1NewScaffoldedcontig_181	26942
s_1_1_contig139564	s_1_1NewScaffoldedcontig_181	27779
s_1_1_contig8188	s_1_1NewScaffoldedcontig_181	33502
s_1_1_contig207069	s_1_1NewScaffoldedcontig_182	54
s_1_1_contig222243	s_1_1NewScaffoldedcontig_183	1
s_1_1_contig160356	s_1_1NewScaffoldedcontig_183	1875
s_1_1_contig38469	s_1_1NewScaffoldedcontig_183	5805
s_1_1_contig76313	s_1_1NewScaffoldedcontig_183	6762
s_1_1_contig93251	s_1_1NewScaffoldedcontig_183	14178
s_1_1_contig103861	s_1_1NewScaffoldedcontig_183	16459
s_1_1_contig146356	s_1_1NewScaffoldedcontig_184	734
s_1_1_contig256675	s_1_1NewScaffoldedcontig_184	2446
s_1_1_contig234538	s_1_1NewScaffoldedcontig_184	2885
s_1_1_contig179880	s_1_1NewScaffoldedcontig_185	9746
s_1_1_contig129520	s_1_1NewScaffoldedcontig_185	21472
s_1_1_contig163225	s_1_1NewScaffoldedcontig_186	12245
s_1_1_contig31432	s_1_1NewScaffoldedcontig_187	145
s_1_1_contig6181	s_1_1NewScaffoldedcontig_187	4541
s_1_1_contig61215	s_1_1NewScaffoldedcontig_187	9261
s_1_1_contig163119	s_1_1NewScaffoldedcontig_188	1
s_1_1_contig244643	s_1_1NewScaffoldedcontig_188	3972
s_1_1_contig58291	s_1_1NewScaffoldedcontig_188	4567
s_1_1_contig86360	s_1_1NewScaffoldedcontig_188	10462
s_1_1_contig52829	s_1_1NewScaffoldedcontig_188	24300
s_1_1_contig140261	s_1_1NewScaffoldedcontig_188	31057
s_1_1_contig160943	s_1_1NewScaffoldedcontig_188	33813
s_1_1_contig128861	s_1_1NewScaffoldedcontig_189	1
s_1_1_contig65384	s_1_1NewScaffoldedcontig_189	18335
s_1_1_contig132840	s_1_1NewScaffoldedcontig_190	7859
s_1_1_contig77205	s_1_1NewScaffoldedcontig_191	1
s_1_1_contig6091	s_1_1NewScaffoldedcontig_191	3711
s_1_1_contig160122	s_1_1NewScaffoldedcontig_191	7865
s_1_1_contig64761	s_1_1NewScaffoldedcontig_191	21290
s_1_1_contig120924	s_1_1NewScaffoldedcontig_191	30364
s_1_1_contig165510	s_1_1NewScaffoldedcontig_191	35041
s_1_1_contig40081	s_1_1NewScaffoldedcontig_192	1
s_1_1_contig26877	s_1_1NewScaffoldedcontig_193	22918
s_1_1_contig252731	s_1_1NewScaffoldedcontig_194	50
s_1_1_contig277267	s_1_1NewScaffoldedcontig_197	1
s_1_1_contig159428	s_1_1NewScaffoldedcontig_197	520
s_1_1_contig268107	s_1_1NewScaffoldedcontig_199	19
s_1_1_contig62202	s_1_1NewScaffoldedcontig_200	8802
s_1_1_contig273033	s_1_1NewScaffoldedcontig_200	13070
s_1_1_contig262333	s_1_1NewScaffoldedcontig_201	1
s_1_1_contig135206	s_1_1NewScaffoldedcontig_201	3940
s_1_1_contig151789	s_1_1NewScaffoldedcontig_201	8092
s_1_1_contig29456	s_1_1NewScaffoldedcontig_202	187
s_1_1_contig240472	s_1_1NewScaffoldedcontig_202	5196
s_1_1_contig208020	s_1_1NewScaffoldedcontig_202	6580
s_1_1_contig174651	s_1_1NewScaffoldedcontig_202	9635
s_1_1_contig222781	s_1_1NewScaffoldedcontig_202	11233
s_1_1_contig36782	s_1_1NewScaffoldedcontig_202	14237
s_1_1_contig22021	s_1_1NewScaffoldedcontig_202	17517
s_1_1_contig174862	s_1_1NewScaffoldedcontig_202	20086
s_1_1_contig48420	s_1_1NewScaffoldedcontig_202	23586
s_1_1_contig240606	s_1_1NewScaffoldedcontig_202	24878
s_1_1_contig258338	s_1_1NewScaffoldedcontig_202	27310
s_1_1_contig39342	s_1_1NewScaffoldedcontig_202	29508
s_1_1_contig176021	s_1_1NewScaffoldedcontig_202	33635
s_1_1_contig159538	s_1_1NewScaffoldedcontig_203	1
s_1_1_contig114031	s_1_1NewScaffoldedcontig_203	7292
s_1_1_contig107385	s_1_1NewScaffoldedcontig_203	11506
s_1_1_contig90133	s_1_1NewScaffoldedcontig_203	20234
s_1_1_contig247308	s_1_1NewScaffoldedcontig_204	81
s_1_1_contig189091	s_1_1NewScaffoldedcontig_205	1
s_1_1_contig59399	s_1_1NewScaffoldedcontig_206	1
s_1_1_contig63211	s_1_1NewScaffoldedcontig_208	10
s_1_1_contig140827	s_1_1NewScaffoldedcontig_208	7778
s_1_1_contig7265	s_1_1NewScaffoldedcontig_209	1
s_1_1_contig13005	s_1_1NewScaffoldedcontig_209	4079
s_1_1_contig146360	s_1_1NewScaffoldedcontig_210	1
s_1_1_contig3782	s_1_1NewScaffoldedcontig_211	11
s_1_1_contig217958	s_1_1NewScaffoldedcontig_211	41009
s_1_1_contig35426	s_1_1NewScaffoldedcontig_212	14
s_1_1_contig158909	s_1_1NewScaffoldedcontig_212	26470
s_1_1_contig230124	s_1_1NewScaffoldedcontig_214	91
s_1_1_contig169985	s_1_1NewScaffoldedcontig_215	33
s_1_1_contig121329	s_1_1NewScaffoldedcontig_215	1262
s_1_1_contig232541	s_1_1NewScaffoldedcontig_216	1
s_1_1_contig221271	s_1_1NewScaffoldedcontig_217	13478
s_1_1_contig172911	s_1_1NewScaffoldedcontig_218	27280
s_1_1_contig180829	s_1_1NewScaffoldedcontig_218	28549
s_1_1_contig109234	s_1_1NewScaffoldedcontig_218	40294
s_1_1_contig92400	s_1_1NewScaffoldedcontig_218	42334
s_1_1_contig89286	s_1_1NewScaffoldedcontig_218	52074
s_1_1_contig141568	s_1_1NewScaffoldedcontig_219	1
s_1_1_contig137831	s_1_1NewScaffoldedcontig_219	2323
s_1_1_contig202208	s_1_1NewScaffoldedcontig_219	5045
s_1_1_contig224658	s_1_1NewScaffoldedcontig_219	7218
s_1_1_contig109936	s_1_1NewScaffoldedcontig_219	8776
s_1_1_contig108735	s_1_1NewScaffoldedcontig_219	14611
s_1_1_contig214990	s_1_1NewScaffoldedcontig_219	19834
s_1_1_contig234860	s_1_1NewScaffoldedcontig_219	23814
s_1_1_contig118941	s_1_1NewScaffoldedcontig_219	26061
s_1_1_contig61951	s_1_1NewScaffoldedcontig_219	30924
s_1_1_contig115650	s_1_1NewScaffoldedcontig_219	38748
s_1_1_contig165211	s_1_1NewScaffoldedcontig_219	48262
s_1_1_contig138180	s_1_1NewScaffoldedcontig_220	7456
s_1_1_contig261234	s_1_1NewScaffoldedcontig_220	17324
s_1_1_contig130864	s_1_1NewScaffoldedcontig_220	19127
s_1_1_contig184490	s_1_1NewScaffoldedcontig_221	28564
s_1_1_contig232442	s_1_1NewScaffoldedcontig_223	37
s_1_1_contig216436	s_1_1NewScaffoldedcontig_223	2619
s_1_1_contig161496	s_1_1NewScaffoldedcontig_223	4990
s_1_1_contig79107	s_1_1NewScaffoldedcontig_223	11878
s_1_1_contig194827	s_1_1NewScaffoldedcontig_223	20047
s_1_1_contig230044	s_1_1NewScaffoldedcontig_223	27047
s_1_1_contig129584	s_1_1NewScaffoldedcontig_224	17172
s_1_1_contig66653	s_1_1NewScaffoldedcontig_224	22646
s_1_1_contig116334	s_1_1NewScaffoldedcontig_224	28842
s_1_1_contig161017	s_1_1NewScaffoldedcontig_224	33818
s_1_1_contig128018	s_1_1NewScaffoldedcontig_225	1
s_1_1_contig197863	s_1_1NewScaffoldedcontig_225	31567
s_1_1_contig181649	s_1_1NewScaffoldedcontig_226	21543
s_1_1_contig242028	s_1_1NewScaffoldedcontig_227	38
s_1_1_contig222357	s_1_1NewScaffoldedcontig_228	1
s_1_1_contig72005	s_1_1NewScaffoldedcontig_229	5786
s_1_1_contig207872	s_1_1NewScaffoldedcontig_232	10203
s_1_1_contig158884	s_1_1NewScaffoldedcontig_235	1
s_1_1_contig87903	s_1_1NewScaffoldedcontig_235	3812
s_1_1_contig16123	s_1_1NewScaffoldedcontig_236	1
s_1_1_contig278968	s_1_1NewScaffoldedcontig_237	832
s_1_1_contig223861	s_1_1NewScaffoldedcontig_238	1
s_1_1_contig104758	s_1_1NewScaffoldedcontig_240	1
s_1_1_contig249285	s_1_1NewScaffoldedcontig_240	17402
s_1_1_contig263764	s_1_1NewScaffoldedcontig_242	80
s_1_1_contig217406	s_1_1NewScaffoldedcontig_243	12765
s_1_1_contig230707	s_1_1NewScaffoldedcontig_243	18948
s_1_1_contig12457	s_1_1NewScaffoldedcontig_243	24339
s_1_1_contig120926	s_1_1NewScaffoldedcontig_245	22
s_1_1_contig148601	s_1_1NewScaffoldedcontig_246	16513
s_1_1_contig221869	s_1_1NewScaffoldedcontig_246	18411
s_1_1_contig112035	s_1_1NewScaffoldedcontig_246	19881
s_1_1_contig171531	s_1_1NewScaffoldedcontig_246	25547
s_1_1_contig18135	s_1_1NewScaffoldedcontig_246	27091
s_1_1_contig84563	s_1_1NewScaffoldedcontig_246	30336
s_1_1_contig183409	s_1_1NewScaffoldedcontig_246	37638
s_1_1_contig114104	s_1_1NewScaffoldedcontig_246	40133
s_1_1_contig253466	s_1_1NewScaffoldedcontig_249	160
s_1_1_contig207888	s_1_1NewScaffoldedcontig_249	361
s_1_1_contig189578	s_1_1NewScaffoldedcontig_249	488
s_1_1_contig213250	s_1_1NewScaffoldedcontig_249	593
s_1_1_contig214010	s_1_1NewScaffoldedcontig_249	1286
s_1_1_contig253118	s_1_1NewScaffoldedcontig_249	1286
s_1_1_contig254005	s_1_1NewScaffoldedcontig_249	2504
s_1_1_contig255385	s_1_1NewScaffoldedcontig_249	3099
s_1_1_contig134008	s_1_1NewScaffoldedcontig_250	12074
s_1_1_contig144839	s_1_1NewScaffoldedcontig_250	16804
s_1_1_contig173448	s_1_1NewScaffoldedcontig_251	4748
s_1_1_contig113263	s_1_1NewScaffoldedcontig_251	23233
s_1_1_contig70411	s_1_1NewScaffoldedcontig_251	26618
s_1_1_contig123760	s_1_1NewScaffoldedcontig_252	21410
s_1_1_contig248621	s_1_1NewScaffoldedcontig_253	6284
s_1_1_contig57657	s_1_1NewScaffoldedcontig_253	8808
s_1_1_contig235568	s_1_1NewScaffoldedcontig_254	8050
s_1_1_contig63701	s_1_1NewScaffoldedcontig_254	10419
s_1_1_contig50571	s_1_1NewScaffoldedcontig_254	21152
s_1_1_contig116434	s_1_1NewScaffoldedcontig_254	25127
s_1_1_contig105339	s_1_1NewScaffoldedcontig_255	1
s_1_1_contig59628	s_1_1NewScaffoldedcontig_255	22079
s_1_1_contig186401	s_1_1NewScaffoldedcontig_256	2996
s_1_1_contig71821	s_1_1NewScaffoldedcontig_257	131
s_1_1_contig203623	s_1_1NewScaffoldedcontig_260	9862
s_1_1_contig262632	s_1_1NewScaffoldedcontig_262	18977
s_1_1_contig37160	s_1_1NewScaffoldedcontig_262	21334
s_1_1_contig54364	s_1_1NewScaffoldedcontig_263	9
s_1_1_contig93079	s_1_1NewScaffoldedcontig_264	11920
s_1_1_contig222140	s_1_1NewScaffoldedcontig_264	17599
s_1_1_contig215683	s_1_1NewScaffoldedcontig_264	20530
s_1_1_contig195012	s_1_1NewScaffoldedcontig_264	22825
s_1_1_contig78900	s_1_1NewScaffoldedcontig_265	1
s_1_1_contig280478	s_1_1NewScaffoldedcontig_265	14499
s_1_1_contig233070	s_1_1NewScaffoldedcontig_266	1
s_1_1_contig163532	s_1_1NewScaffoldedcontig_267	1
s_1_1_contig14516	s_1_1NewScaffoldedcontig_267	3251
s_1_1_contig49672	s_1_1NewScaffoldedcontig_267	7610
s_1_1_contig181328	s_1_1NewScaffoldedcontig_268	52579
s_1_1_contig65846	s_1_1NewScaffoldedcontig_269	1
s_1_1_contig190424	s_1_1NewScaffoldedcontig_270	46
s_1_1_contig197598	s_1_1NewScaffoldedcontig_271	57
s_1_1_contig215878	s_1_1NewScaffoldedcontig_272	1
s_1_1_contig70543	s_1_1NewScaffoldedcontig_272	7443
s_1_1_contig231520	s_1_1NewScaffoldedcontig_273	6305
s_1_1_contig81368	s_1_1NewScaffoldedcontig_276	9779
s_1_1_contig122228	s_1_1NewScaffoldedcontig_277	356
s_1_1_contig240339	s_1_1NewScaffoldedcontig_277	8491
s_1_1_contig152300	s_1_1NewScaffoldedcontig_278	1
s_1_1_contig103097	s_1_1NewScaffoldedcontig_278	3079
s_1_1_contig568	s_1_1NewScaffoldedcontig_278	4790
s_1_1_contig257945	s_1_1NewScaffoldedcontig_278	10466
s_1_1_contig147305	s_1_1NewScaffoldedcontig_278	11075
s_1_1_contig181758	s_1_1NewScaffoldedcontig_279	1
s_1_1_contig265309	s_1_1NewScaffoldedcontig_279	5142
s_1_1_contig68849	s_1_1NewScaffoldedcontig_279	10548
s_1_1_contig132930	s_1_1NewScaffoldedcontig_280	1
s_1_1_contig45767	s_1_1NewScaffoldedcontig_282	1
s_1_1_contig216918	s_1_1NewScaffoldedcontig_284	1
s_1_1_contig77465	s_1_1NewScaffoldedcontig_284	36593
s_1_1_contig264935	s_1_1NewScaffoldedcontig_284	41897
s_1_1_contig107978	s_1_1NewScaffoldedcontig_285	89
s_1_1_contig241612	s_1_1NewScaffoldedcontig_285	9675
s_1_1_contig82658	s_1_1NewScaffoldedcontig_285	10311
s_1_1_contig263563	s_1_1NewScaffoldedcontig_285	18865
s_1_1_contig279286	s_1_1NewScaffoldedcontig_285	26557
s_1_1_contig121418	s_1_1NewScaffoldedcontig_286	1
s_1_1_contig21284	s_1_1NewScaffoldedcontig_287	6967
s_1_1_contig62051	s_1_1NewScaffoldedcontig_287	8496
s_1_1_contig125271	s_1_1NewScaffoldedcontig_287	22284
s_1_1_contig253819	s_1_1NewScaffoldedcontig_289	2738
s_1_1_contig257927	s_1_1NewScaffoldedcontig_289	7572
s_1_1_contig219359	s_1_1NewScaffoldedcontig_290	89
s_1_1_contig159446	s_1_1NewScaffoldedcontig_290	4983
s_1_1_contig5539	s_1_1NewScaffoldedcontig_290	14186
s_1_1_contig218633	s_1_1NewScaffoldedcontig_290	17093
s_1_1_contig3765	s_1_1NewScaffoldedcontig_293	9896
s_1_1_contig105287	s_1_1NewScaffoldedcontig_294	3626
s_1_1_contig225673	s_1_1NewScaffoldedcontig_294	8728
s_1_1_contig192564	s_1_1NewScaffoldedcontig_294	10753
s_1_1_contig71896	s_1_1NewScaffoldedcontig_294	12196
s_1_1_contig96793	s_1_1NewScaffoldedcontig_294	22799
s_1_1_contig122084	s_1_1NewScaffoldedcontig_294	28875
s_1_1_contig222713	s_1_1NewScaffoldedcontig_294	32285
s_1_1_contig102673	s_1_1NewScaffoldedcontig_294	34256
s_1_1_contig228879	s_1_1NewScaffoldedcontig_295	1311
s_1_1_contig18646	s_1_1NewScaffoldedcontig_295	17823
s_1_1_contig73191	s_1_1NewScaffoldedcontig_296	428
s_1_1_contig29985	s_1_1NewScaffoldedcontig_296	8067
s_1_1_contig164647	s_1_1NewScaffoldedcontig_297	1417
s_1_1_contig24190	s_1_1NewScaffoldedcontig_297	18791
s_1_1_contig119453	s_1_1NewScaffoldedcontig_298	25
s_1_1_contig216736	s_1_1NewScaffoldedcontig_298	5267
s_1_1_contig74456	s_1_1NewScaffoldedcontig_298	8321
s_1_1_contig121887	s_1_1NewScaffoldedcontig_298	20508
s_1_1_contig75894	s_1_1NewScaffoldedcontig_300	13910
s_1_1_contig121045	s_1_1NewScaffoldedcontig_300	21703
s_1_1_contig90459	s_1_1NewScaffoldedcontig_300	43613
s_1_1_contig265314	s_1_1NewScaffoldedcontig_300	50013
s_1_1_contig59456	s_1_1NewScaffoldedcontig_300	53791
s_1_1_contig158476	s_1_1NewScaffoldedcontig_300	61247
s_1_1_contig203439	s_1_1NewScaffoldedcontig_301	1
s_1_1_contig21005	s_1_1NewScaffoldedcontig_302	42577
s_1_1_contig60125	s_1_1NewScaffoldedcontig_302	44686
s_1_1_contig45806	s_1_1NewScaffoldedcontig_302	47108
s_1_1_contig3005	s_1_1NewScaffoldedcontig_302	47300
s_1_1_contig127896	s_1_1NewScaffoldedcontig_302	48913
s_1_1_contig226193	s_1_1NewScaffoldedcontig_302	51139
s_1_1_contig22993	s_1_1NewScaffoldedcontig_302	53782
s_1_1_contig221091	s_1_1NewScaffoldedcontig_302	58271
s_1_1_contig242984	s_1_1NewScaffoldedcontig_302	63757
s_1_1_contig156970	s_1_1NewScaffoldedcontig_305	1
s_1_1_contig30837	s_1_1NewScaffoldedcontig_305	20713
s_1_1_contig76439	s_1_1NewScaffoldedcontig_305	21487
s_1_1_contig85522	s_1_1NewScaffoldedcontig_305	28285
s_1_1_contig57483	s_1_1NewScaffoldedcontig_305	38524
s_1_1_contig35145	s_1_1NewScaffoldedcontig_306	24
s_1_1_contig6247	s_1_1NewScaffoldedcontig_306	1614
s_1_1_contig5949	s_1_1NewScaffoldedcontig_307	1
s_1_1_contig50443	s_1_1NewScaffoldedcontig_308	727
s_1_1_contig132168	s_1_1NewScaffoldedcontig_308	6296
s_1_1_contig259794	s_1_1NewScaffoldedcontig_308	12448
s_1_1_contig188626	s_1_1NewScaffoldedcontig_309	79
s_1_1_contig247256	s_1_1NewScaffoldedcontig_310	1988
s_1_1_contig110528	s_1_1NewScaffoldedcontig_310	4554
s_1_1_contig141283	s_1_1NewScaffoldedcontig_310	8567
s_1_1_contig227929	s_1_1NewScaffoldedcontig_310	10713
s_1_1_contig259787	s_1_1NewScaffoldedcontig_310	14758
s_1_1_contig68696	s_1_1NewScaffoldedcontig_310	15636
s_1_1_contig238822	s_1_1NewScaffoldedcontig_310	20087
s_1_1_contig6231	s_1_1NewScaffoldedcontig_312	1
s_1_1_contig262389	s_1_1NewScaffoldedcontig_312	2725
s_1_1_contig69513	s_1_1NewScaffoldedcontig_313	1
s_1_1_contig217885	s_1_1NewScaffoldedcontig_313	4703
s_1_1_contig228816	s_1_1NewScaffoldedcontig_313	10908
s_1_1_contig180437	s_1_1NewScaffoldedcontig_313	12568
s_1_1_contig14344	s_1_1NewScaffoldedcontig_313	16163
s_1_1_contig221270	s_1_1NewScaffoldedcontig_313	17656
s_1_1_contig64842	s_1_1NewScaffoldedcontig_313	19494
s_1_1_contig136125	s_1_1NewScaffoldedcontig_313	22205
s_1_1_contig245362	s_1_1NewScaffoldedcontig_314	46
s_1_1_contig221693	s_1_1NewScaffoldedcontig_315	38
s_1_1_contig192888	s_1_1NewScaffoldedcontig_316	681
s_1_1_contig91794	s_1_1NewScaffoldedcontig_316	4525
s_1_1_contig81757	s_1_1NewScaffoldedcontig_317	15
s_1_1_contig234489	s_1_1NewScaffoldedcontig_317	5785
s_1_1_contig113249	s_1_1NewScaffoldedcontig_317	7895
s_1_1_contig263223	s_1_1NewScaffoldedcontig_317	13512
s_1_1_contig228885	s_1_1NewScaffoldedcontig_317	16737
s_1_1_contig63914	s_1_1NewScaffoldedcontig_317	19970
s_1_1_contig86050	s_1_1NewScaffoldedcontig_317	40903
s_1_1_contig57835	s_1_1NewScaffoldedcontig_319	439
s_1_1_contig148951	s_1_1NewScaffoldedcontig_319	4234
s_1_1_contig184458	s_1_1NewScaffoldedcontig_319	8746
s_1_1_contig187235	s_1_1NewScaffoldedcontig_321	1
s_1_1_contig158837	s_1_1NewScaffoldedcontig_321	3307
s_1_1_contig85265	s_1_1NewScaffoldedcontig_321	5590
s_1_1_contig180203	s_1_1NewScaffoldedcontig_322	246
s_1_1_contig68065	s_1_1NewScaffoldedcontig_322	6966
s_1_1_contig33597	s_1_1NewScaffoldedcontig_322	10615
s_1_1_contig31701	s_1_1NewScaffoldedcontig_322	11674
s_1_1_contig7539	s_1_1NewScaffoldedcontig_322	12520
s_1_1_contig104096	s_1_1NewScaffoldedcontig_322	14420
s_1_1_contig5568	s_1_1NewScaffoldedcontig_322	44557
s_1_1_contig6880	s_1_1NewScaffoldedcontig_323	28935
s_1_1_contig162710	s_1_1NewScaffoldedcontig_323	36959
s_1_1_contig257173	s_1_1NewScaffoldedcontig_324	1
s_1_1_contig255907	s_1_1NewScaffoldedcontig_324	2
s_1_1_contig257116	s_1_1NewScaffoldedcontig_324	10
s_1_1_contig265911	s_1_1NewScaffoldedcontig_324	20096
s_1_1_contig112419	s_1_1NewScaffoldedcontig_324	32865
s_1_1_contig158954	s_1_1NewScaffoldedcontig_324	41780
s_1_1_contig166451	s_1_1NewScaffoldedcontig_326	9319
s_1_1_contig278645	s_1_1NewScaffoldedcontig_326	16343
s_1_1_contig100794	s_1_1NewScaffoldedcontig_327	22192
s_1_1_contig263277	s_1_1NewScaffoldedcontig_328	119
s_1_1_contig137179	s_1_1NewScaffoldedcontig_328	5893
s_1_1_contig179971	s_1_1NewScaffoldedcontig_328	9716
s_1_1_contig235053	s_1_1NewScaffoldedcontig_329	1
s_1_1_contig50201	s_1_1NewScaffoldedcontig_331	3871
s_1_1_contig61037	s_1_1NewScaffoldedcontig_331	8470
s_1_1_contig207418	s_1_1NewScaffoldedcontig_332	10279
s_1_1_contig68651	s_1_1NewScaffoldedcontig_332	38649
s_1_1_contig9047	s_1_1NewScaffoldedcontig_332	45008
s_1_1_contig181634	s_1_1NewScaffoldedcontig_332	62810
s_1_1_contig66869	s_1_1NewScaffoldedcontig_334	19203
s_1_1_contig227466	s_1_1NewScaffoldedcontig_334	22244
s_1_1_contig76414	s_1_1NewScaffoldedcontig_334	28799
s_1_1_contig92614	s_1_1NewScaffoldedcontig_335	1
s_1_1_contig258736	s_1_1NewScaffoldedcontig_337	17087
s_1_1_contig167959	s_1_1NewScaffoldedcontig_337	18327
s_1_1_contig164522	s_1_1NewScaffoldedcontig_338	251
s_1_1_contig58299	s_1_1NewScaffoldedcontig_338	16245
s_1_1_contig199946	s_1_1NewScaffoldedcontig_338	23597
s_1_1_contig93963	s_1_1NewScaffoldedcontig_339	21
s_1_1_contig111936	s_1_1NewScaffoldedcontig_340	1
s_1_1_contig130239	s_1_1NewScaffoldedcontig_341	1
s_1_1_contig123927	s_1_1NewScaffoldedcontig_341	7509
s_1_1_contig215790	s_1_1NewScaffoldedcontig_342	1
s_1_1_contig109371	s_1_1NewScaffoldedcontig_342	3148
s_1_1_contig221059	s_1_1NewScaffoldedcontig_343	14723
s_1_1_contig107074	s_1_1NewScaffoldedcontig_343	27371
s_1_1_contig81505	s_1_1NewScaffoldedcontig_344	11644
s_1_1_contig99528	s_1_1NewScaffoldedcontig_344	15269
s_1_1_contig83626	s_1_1NewScaffoldedcontig_344	20293
s_1_1_contig269808	s_1_1NewScaffoldedcontig_344	25299
s_1_1_contig43787	s_1_1NewScaffoldedcontig_344	28303
s_1_1_contig126074	s_1_1NewScaffoldedcontig_344	29021
s_1_1_contig7130	s_1_1NewScaffoldedcontig_344	31681
s_1_1_contig58333	s_1_1NewScaffoldedcontig_344	33798
s_1_1_contig164487	s_1_1NewScaffoldedcontig_344	41237
s_1_1_contig266754	s_1_1NewScaffoldedcontig_344	43379
s_1_1_contig74821	s_1_1NewScaffoldedcontig_344	45460
s_1_1_contig120805	s_1_1NewScaffoldedcontig_344	68733
s_1_1_contig163013	s_1_1NewScaffoldedcontig_344	72038
s_1_1_contig7871	s_1_1NewScaffoldedcontig_344	75966
s_1_1_contig52773	s_1_1NewScaffoldedcontig_344	103847
s_1_1_contig20986	s_1_1NewScaffoldedcontig_344	114551
s_1_1_contig250073	s_1_1NewScaffoldedcontig_344	115646
s_1_1_contig266781	s_1_1NewScaffoldedcontig_344	116918
s_1_1_contig261659	s_1_1NewScaffoldedcontig_345	10055
s_1_1_contig18914	s_1_1NewScaffoldedcontig_347	1
s_1_1_contig230632	s_1_1NewScaffoldedcontig_348	1
s_1_1_contig10678	s_1_1NewScaffoldedcontig_348	1197
s_1_1_contig9134	s_1_1NewScaffoldedcontig_348	4018
s_1_1_contig181724	s_1_1NewScaffoldedcontig_349	1
s_1_1_contig71807	s_1_1NewScaffoldedcontig_349	10975
s_1_1_contig155772	s_1_1NewScaffoldedcontig_350	1
s_1_1_contig217262	s_1_1NewScaffoldedcontig_350	16675
s_1_1_contig151083	s_1_1NewScaffoldedcontig_351	13762
s_1_1_contig88371	s_1_1NewScaffoldedcontig_352	22
s_1_1_contig214717	s_1_1NewScaffoldedcontig_353	172
s_1_1_contig259053	s_1_1NewScaffoldedcontig_353	809
s_1_1_contig151506	s_1_1NewScaffoldedcontig_354	6740
s_1_1_contig116509	s_1_1NewScaffoldedcontig_355	30
s_1_1_contig97814	s_1_1NewScaffoldedcontig_357	98
s_1_1_contig10018	s_1_1NewScaffoldedcontig_357	8156
s_1_1_contig199053	s_1_1NewScaffoldedcontig_358	38491
s_1_1_contig243395	s_1_1NewScaffoldedcontig_360	1915
s_1_1_contig121737	s_1_1NewScaffoldedcontig_360	24361
s_1_1_contig230596	s_1_1NewScaffoldedcontig_361	8890
s_1_1_contig158795	s_1_1NewScaffoldedcontig_363	1
s_1_1_contig38884	s_1_1NewScaffoldedcontig_363	2923
s_1_1_contig220183	s_1_1NewScaffoldedcontig_363	6343
s_1_1_contig142770	s_1_1NewScaffoldedcontig_363	10021
s_1_1_contig108929	s_1_1NewScaffoldedcontig_363	18633
s_1_1_contig61430	s_1_1NewScaffoldedcontig_363	25832
s_1_1_contig187404	s_1_1NewScaffoldedcontig_363	31702
s_1_1_contig91675	s_1_1NewScaffoldedcontig_363	33552
s_1_1_contig108887	s_1_1NewScaffoldedcontig_364	1
s_1_1_contig216752	s_1_1NewScaffoldedcontig_365	13195
s_1_1_contig181073	s_1_1NewScaffoldedcontig_365	19695
s_1_1_contig14833	s_1_1NewScaffoldedcontig_365	39453
s_1_1_contig71006	s_1_1NewScaffoldedcontig_365	41731
s_1_1_contig123699	s_1_1NewScaffoldedcontig_365	45968
s_1_1_contig123270	s_1_1NewScaffoldedcontig_366	1
s_1_1_contig207987	s_1_1NewScaffoldedcontig_366	5010
s_1_1_contig119964	s_1_1NewScaffoldedcontig_366	26043
s_1_1_contig199208	s_1_1NewScaffoldedcontig_366	39575
s_1_1_contig166693	s_1_1NewScaffoldedcontig_366	41589
s_1_1_contig219515	s_1_1NewScaffoldedcontig_367	17
s_1_1_contig97322	s_1_1NewScaffoldedcontig_368	1
s_1_1_contig262060	s_1_1NewScaffoldedcontig_370	2825
s_1_1_contig8697	s_1_1NewScaffoldedcontig_370	10601
s_1_1_contig147180	s_1_1NewScaffoldedcontig_371	20399
s_1_1_contig126427	s_1_1NewScaffoldedcontig_373	408
s_1_1_contig130537	s_1_1NewScaffoldedcontig_374	1
s_1_1_contig167725	s_1_1NewScaffoldedcontig_378	56
s_1_1_contig139062	s_1_1NewScaffoldedcontig_378	2932
s_1_1_contig200523	s_1_1NewScaffoldedcontig_378	4473
s_1_1_contig125971	s_1_1NewScaffoldedcontig_378	8232
s_1_1_contig145600	s_1_1NewScaffoldedcontig_379	1
s_1_1_contig119769	s_1_1NewScaffoldedcontig_379	4528
s_1_1_contig7051	s_1_1NewScaffoldedcontig_379	11555
s_1_1_contig141404	s_1_1NewScaffoldedcontig_379	13913
s_1_1_contig51031	s_1_1NewScaffoldedcontig_379	18991
s_1_1_contig192125	s_1_1NewScaffoldedcontig_379	22386
s_1_1_contig34064	s_1_1NewScaffoldedcontig_379	25466
s_1_1_contig259910	s_1_1NewScaffoldedcontig_379	29803
s_1_1_contig25168	s_1_1NewScaffoldedcontig_379	31209
s_1_1_contig215559	s_1_1NewScaffoldedcontig_379	33486
s_1_1_contig259673	s_1_1NewScaffoldedcontig_379	36661
s_1_1_contig139599	s_1_1NewScaffoldedcontig_379	37840
s_1_1_contig97347	s_1_1NewScaffoldedcontig_380	23
s_1_1_contig231703	s_1_1NewScaffoldedcontig_381	613
s_1_1_contig136642	s_1_1NewScaffoldedcontig_381	4432
s_1_1_contig135757	s_1_1NewScaffoldedcontig_381	6220
s_1_1_contig83842	s_1_1NewScaffoldedcontig_381	8699
s_1_1_contig56760	s_1_1NewScaffoldedcontig_382	2369
s_1_1_contig91447	s_1_1NewScaffoldedcontig_382	8497
s_1_1_contig213887	s_1_1NewScaffoldedcontig_382	13840
s_1_1_contig59020	s_1_1NewScaffoldedcontig_382	14885
s_1_1_contig261644	s_1_1NewScaffoldedcontig_383	1
s_1_1_contig219250	s_1_1NewScaffoldedcontig_383	2867
s_1_1_contig269199	s_1_1NewScaffoldedcontig_383	8327
s_1_1_contig179645	s_1_1NewScaffoldedcontig_387	1
s_1_1_contig256588	s_1_1NewScaffoldedcontig_387	12974
s_1_1_contig240120	s_1_1NewScaffoldedcontig_387	13583
s_1_1_contig82082	s_1_1NewScaffoldedcontig_388	1
s_1_1_contig58327	s_1_1NewScaffoldedcontig_390	12558
s_1_1_contig29522	s_1_1NewScaffoldedcontig_391	1
s_1_1_contig21643	s_1_1NewScaffoldedcontig_391	4001
s_1_1_contig172431	s_1_1NewScaffoldedcontig_393	9941
s_1_1_contig221081	s_1_1NewScaffoldedcontig_393	11787
s_1_1_contig68668	s_1_1NewScaffoldedcontig_394	679
s_1_1_contig37744	s_1_1NewScaffoldedcontig_394	5790
s_1_1_contig210395	s_1_1NewScaffoldedcontig_394	36486
s_1_1_contig253625	s_1_1NewScaffoldedcontig_394	59014
s_1_1_contig161980	s_1_1NewScaffoldedcontig_394	59502
s_1_1_contig234011	s_1_1NewScaffoldedcontig_396	93
s_1_1_contig277664	s_1_1NewScaffoldedcontig_396	1676
s_1_1_contig126198	s_1_1NewScaffoldedcontig_396	2326
s_1_1_contig163154	s_1_1NewScaffoldedcontig_396	8409
s_1_1_contig223911	s_1_1NewScaffoldedcontig_397	26553
s_1_1_contig120076	s_1_1NewScaffoldedcontig_398	1
s_1_1_contig181602	s_1_1NewScaffoldedcontig_398	7733
s_1_1_contig226045	s_1_1NewScaffoldedcontig_400	11561
s_1_1_contig17709	s_1_1NewScaffoldedcontig_400	14189
s_1_1_contig163215	s_1_1NewScaffoldedcontig_400	30986
s_1_1_contig186202	s_1_1NewScaffoldedcontig_400	37477
s_1_1_contig32509	s_1_1NewScaffoldedcontig_400	40830
s_1_1_contig188827	s_1_1NewScaffoldedcontig_400	42477
s_1_1_contig100259	s_1_1NewScaffoldedcontig_400	48650
s_1_1_contig59846	s_1_1NewScaffoldedcontig_400	57201
s_1_1_contig262164	s_1_1NewScaffoldedcontig_401	40
s_1_1_contig216931	s_1_1NewScaffoldedcontig_401	3607
s_1_1_contig131569	s_1_1NewScaffoldedcontig_402	20
s_1_1_contig149663	s_1_1NewScaffoldedcontig_404	97
s_1_1_contig69453	s_1_1NewScaffoldedcontig_404	2449
s_1_1_contig162439	s_1_1NewScaffoldedcontig_404	8235
s_1_1_contig227992	s_1_1NewScaffoldedcontig_404	45842
s_1_1_contig153580	s_1_1NewScaffoldedcontig_405	978
s_1_1_contig186040	s_1_1NewScaffoldedcontig_405	4199
s_1_1_contig255132	s_1_1NewScaffoldedcontig_407	1
s_1_1_contig161774	s_1_1NewScaffoldedcontig_407	1860
s_1_1_contig156260	s_1_1NewScaffoldedcontig_407	5292
s_1_1_contig23095	s_1_1NewScaffoldedcontig_407	9711
s_1_1_contig273725	s_1_1NewScaffoldedcontig_407	12900
s_1_1_contig170765	s_1_1NewScaffoldedcontig_407	14653
s_1_1_contig38273	s_1_1NewScaffoldedcontig_407	15828
s_1_1_contig14340	s_1_1NewScaffoldedcontig_407	16408
s_1_1_contig202027	s_1_1NewScaffoldedcontig_407	17339
s_1_1_contig13375	s_1_1NewScaffoldedcontig_407	18870
s_1_1_contig219270	s_1_1NewScaffoldedcontig_407	22134
s_1_1_contig29851	s_1_1NewScaffoldedcontig_407	27259
s_1_1_contig101396	s_1_1NewScaffoldedcontig_407	29605
s_1_1_contig167146	s_1_1NewScaffoldedcontig_408	22026
s_1_1_contig210300	s_1_1NewScaffoldedcontig_408	24378
s_1_1_contig190602	s_1_1NewScaffoldedcontig_410	1
s_1_1_contig133934	s_1_1NewScaffoldedcontig_410	950
s_1_1_contig165301	s_1_1NewScaffoldedcontig_410	8213
s_1_1_contig281769	s_1_1NewScaffoldedcontig_410	10654
s_1_1_contig121259	s_1_1NewScaffoldedcontig_410	11168
s_1_1_contig162054	s_1_1NewScaffoldedcontig_410	13529
s_1_1_contig86535	s_1_1NewScaffoldedcontig_410	94978
s_1_1_contig28791	s_1_1NewScaffoldedcontig_411	20740
s_1_1_contig27964	s_1_1NewScaffoldedcontig_411	21447
s_1_1_contig268098	s_1_1NewScaffoldedcontig_411	24395
s_1_1_contig168986	s_1_1NewScaffoldedcontig_411	26149
s_1_1_contig13666	s_1_1NewScaffoldedcontig_411	28608
s_1_1_contig230706	s_1_1NewScaffoldedcontig_412	104
s_1_1_contig212298	s_1_1NewScaffoldedcontig_412	3312
s_1_1_contig259486	s_1_1NewScaffoldedcontig_414	21138
s_1_1_contig270381	s_1_1NewScaffoldedcontig_414	21871
s_1_1_contig3129	s_1_1NewScaffoldedcontig_414	24084
s_1_1_contig4420	s_1_1NewScaffoldedcontig_416	22
s_1_1_contig193985	s_1_1NewScaffoldedcontig_416	3041
s_1_1_contig166006	s_1_1NewScaffoldedcontig_416	4218
s_1_1_contig72983	s_1_1NewScaffoldedcontig_416	9968
s_1_1_contig158281	s_1_1NewScaffoldedcontig_416	14569
s_1_1_contig188619	s_1_1NewScaffoldedcontig_416	16867
s_1_1_contig224206	s_1_1NewScaffoldedcontig_416	21515
s_1_1_contig92729	s_1_1NewScaffoldedcontig_417	1
s_1_1_contig233644	s_1_1NewScaffoldedcontig_417	5052
s_1_1_contig157192	s_1_1NewScaffoldedcontig_417	20496
s_1_1_contig139161	s_1_1NewScaffoldedcontig_417	24873
s_1_1_contig48718	s_1_1NewScaffoldedcontig_418	3284
s_1_1_contig120043	s_1_1NewScaffoldedcontig_418	4188
s_1_1_contig37275	s_1_1NewScaffoldedcontig_418	13147
s_1_1_contig136196	s_1_1NewScaffoldedcontig_418	14719
s_1_1_contig265861	s_1_1NewScaffoldedcontig_418	17447
s_1_1_contig29592	s_1_1NewScaffoldedcontig_418	22475
s_1_1_contig13802	s_1_1NewScaffoldedcontig_418	23447
s_1_1_contig226286	s_1_1NewScaffoldedcontig_418	25821
s_1_1_contig7194	s_1_1NewScaffoldedcontig_418	29569
s_1_1_contig19372	s_1_1NewScaffoldedcontig_418	31071
s_1_1_contig209341	s_1_1NewScaffoldedcontig_418	33048
s_1_1_contig1417	s_1_1NewScaffoldedcontig_418	34127
s_1_1_contig252453	s_1_1NewScaffoldedcontig_418	36162
s_1_1_contig111814	s_1_1NewScaffoldedcontig_418	40131
s_1_1_contig110788	s_1_1NewScaffoldedcontig_419	11886
s_1_1_contig5085	s_1_1NewScaffoldedcontig_421	23
s_1_1_contig87833	s_1_1NewScaffoldedcontig_422	6477
s_1_1_contig55829	s_1_1NewScaffoldedcontig_423	272
s_1_1_contig74475	s_1_1NewScaffoldedcontig_423	5668
s_1_1_contig198576	s_1_1NewScaffoldedcontig_423	14277
s_1_1_contig187198	s_1_1NewScaffoldedcontig_423	17695
s_1_1_contig61601	s_1_1NewScaffoldedcontig_423	19893
s_1_1_contig60131	s_1_1NewScaffoldedcontig_423	27435
s_1_1_contig268687	s_1_1NewScaffoldedcontig_423	35236
s_1_1_contig128056	s_1_1NewScaffoldedcontig_423	36296
s_1_1_contig258358	s_1_1NewScaffoldedcontig_424	2212
s_1_1_contig241930	s_1_1NewScaffoldedcontig_429	1
s_1_1_contig156437	s_1_1NewScaffoldedcontig_429	1011
s_1_1_contig260252	s_1_1NewScaffoldedcontig_429	6093
s_1_1_contig188961	s_1_1NewScaffoldedcontig_430	761
s_1_1_contig7154	s_1_1NewScaffoldedcontig_431	28653
s_1_1_contig277428	s_1_1NewScaffoldedcontig_432	1
s_1_1_contig210414	s_1_1NewScaffoldedcontig_432	859
s_1_1_contig245879	s_1_1NewScaffoldedcontig_437	2557
s_1_1_contig22740	s_1_1NewScaffoldedcontig_437	5551
s_1_1_contig209859	s_1_1NewScaffoldedcontig_438	1
s_1_1_contig96314	s_1_1NewScaffoldedcontig_438	3098
s_1_1_contig18201	s_1_1NewScaffoldedcontig_438	10710
s_1_1_contig69403	s_1_1NewScaffoldedcontig_438	16474
s_1_1_contig185236	s_1_1NewScaffoldedcontig_441	197
s_1_1_contig171428	s_1_1NewScaffoldedcontig_442	29
s_1_1_contig62107	s_1_1NewScaffoldedcontig_442	32019
s_1_1_contig101809	s_1_1NewScaffoldedcontig_442	35447
s_1_1_contig267172	s_1_1NewScaffoldedcontig_443	1420
s_1_1_contig142661	s_1_1NewScaffoldedcontig_444	2
s_1_1_contig172055	s_1_1NewScaffoldedcontig_445	6666
s_1_1_contig162172	s_1_1NewScaffoldedcontig_445	10408
s_1_1_contig8537	s_1_1NewScaffoldedcontig_446	20395
s_1_1_contig9482	s_1_1NewScaffoldedcontig_447	13240
s_1_1_contig60271	s_1_1NewScaffoldedcontig_447	26159
s_1_1_contig24005	s_1_1NewScaffoldedcontig_447	28961
s_1_1_contig166083	s_1_1NewScaffoldedcontig_447	36611
s_1_1_contig182502	s_1_1NewScaffoldedcontig_448	4874
s_1_1_contig95072	s_1_1NewScaffoldedcontig_448	6853
s_1_1_contig129956	s_1_1NewScaffoldedcontig_451	6896
s_1_1_contig112526	s_1_1NewScaffoldedcontig_451	12732
s_1_1_contig93343	s_1_1NewScaffoldedcontig_453	1
s_1_1_contig5746	s_1_1NewScaffoldedcontig_456	339
s_1_1_contig198285	s_1_1NewScaffoldedcontig_456	3801
s_1_1_contig215534	s_1_1NewScaffoldedcontig_457	1
s_1_1_contig222921	s_1_1NewScaffoldedcontig_457	3787
s_1_1_contig147994	s_1_1NewScaffoldedcontig_458	7678
s_1_1_contig118044	s_1_1NewScaffoldedcontig_460	1
s_1_1_contig150842	s_1_1NewScaffoldedcontig_460	18829
s_1_1_contig123627	s_1_1NewScaffoldedcontig_460	21024
s_1_1_contig8751	s_1_1NewScaffoldedcontig_460	36787
s_1_1_contig10459	s_1_1NewScaffoldedcontig_461	1
s_1_1_contig38865	s_1_1NewScaffoldedcontig_461	17251
s_1_1_contig229017	s_1_1NewScaffoldedcontig_462	4084
s_1_1_contig173812	s_1_1NewScaffoldedcontig_462	7267
s_1_1_contig163652	s_1_1NewScaffoldedcontig_462	8393
s_1_1_contig53487	s_1_1NewScaffoldedcontig_462	10588
s_1_1_contig73330	s_1_1NewScaffoldedcontig_462	21550
s_1_1_contig227437	s_1_1NewScaffoldedcontig_463	1
s_1_1_contig126036	s_1_1NewScaffoldedcontig_463	1293
s_1_1_contig212204	s_1_1NewScaffoldedcontig_463	46672
s_1_1_contig234146	s_1_1NewScaffoldedcontig_464	126
s_1_1_contig112505	s_1_1NewScaffoldedcontig_464	5310
s_1_1_contig97893	s_1_1NewScaffoldedcontig_464	12044
s_1_1_contig270150	s_1_1NewScaffoldedcontig_464	19704
s_1_1_contig18323	s_1_1NewScaffoldedcontig_464	21188
s_1_1_contig125381	s_1_1NewScaffoldedcontig_464	24680
s_1_1_contig92943	s_1_1NewScaffoldedcontig_466	1
s_1_1_contig127514	s_1_1NewScaffoldedcontig_466	6927
s_1_1_contig36702	s_1_1NewScaffoldedcontig_466	12447
s_1_1_contig29937	s_1_1NewScaffoldedcontig_466	13431
s_1_1_contig202784	s_1_1NewScaffoldedcontig_466	23748
s_1_1_contig805	s_1_1NewScaffoldedcontig_466	24470
s_1_1_contig196836	s_1_1NewScaffoldedcontig_466	25737
s_1_1_contig11083	s_1_1NewScaffoldedcontig_466	26815
s_1_1_contig226729	s_1_1NewScaffoldedcontig_466	28085
s_1_1_contig60145	s_1_1NewScaffoldedcontig_467	1
s_1_1_contig222691	s_1_1NewScaffoldedcontig_467	3458
s_1_1_contig138011	s_1_1NewScaffoldedcontig_467	6709
s_1_1_contig263416	s_1_1NewScaffoldedcontig_468	7836
s_1_1_contig178644	s_1_1NewScaffoldedcontig_469	10380
s_1_1_contig273181	s_1_1NewScaffoldedcontig_471	34551
s_1_1_contig20014	s_1_1NewScaffoldedcontig_471	52260
s_1_1_contig101588	s_1_1NewScaffoldedcontig_471	53187
s_1_1_contig124897	s_1_1NewScaffoldedcontig_471	71833
s_1_1_contig112199	s_1_1NewScaffoldedcontig_471	75108
s_1_1_contig77473	s_1_1NewScaffoldedcontig_472	24184
s_1_1_contig220068	s_1_1NewScaffoldedcontig_473	7479
s_1_1_contig151850	s_1_1NewScaffoldedcontig_473	11451
s_1_1_contig180385	s_1_1NewScaffoldedcontig_474	11706
s_1_1_contig24769	s_1_1NewScaffoldedcontig_475	1
s_1_1_contig55162	s_1_1NewScaffoldedcontig_475	801
s_1_1_contig15385	s_1_1NewScaffoldedcontig_475	33036
s_1_1_contig163800	s_1_1NewScaffoldedcontig_475	53069
s_1_1_contig274818	s_1_1NewScaffoldedcontig_476	36
s_1_1_contig222798	s_1_1NewScaffoldedcontig_477	1
s_1_1_contig92167	s_1_1NewScaffoldedcontig_478	8940
s_1_1_contig97144	s_1_1NewScaffoldedcontig_478	18582
s_1_1_contig126640	s_1_1NewScaffoldedcontig_479	6711
s_1_1_contig217847	s_1_1NewScaffoldedcontig_480	12517
s_1_1_contig46928	s_1_1NewScaffoldedcontig_480	42675
s_1_1_contig65493	s_1_1NewScaffoldedcontig_480	43256
s_1_1_contig102335	s_1_1NewScaffoldedcontig_480	49736
s_1_1_contig212844	s_1_1NewScaffoldedcontig_480	52288
s_1_1_contig165080	s_1_1NewScaffoldedcontig_480	53137
s_1_1_contig238688	s_1_1NewScaffoldedcontig_481	10375
s_1_1_contig114160	s_1_1NewScaffoldedcontig_481	11053
s_1_1_contig231114	s_1_1NewScaffoldedcontig_481	17022
s_1_1_contig181818	s_1_1NewScaffoldedcontig_482	1
s_1_1_contig236354	s_1_1NewScaffoldedcontig_482	64217
s_1_1_contig12169	s_1_1NewScaffoldedcontig_483	194
s_1_1_contig94422	s_1_1NewScaffoldedcontig_483	6586
s_1_1_contig62312	s_1_1NewScaffoldedcontig_485	1450
s_1_1_contig216908	s_1_1NewScaffoldedcontig_485	7814
s_1_1_contig10685	s_1_1NewScaffoldedcontig_486	8955
s_1_1_contig280496	s_1_1NewScaffoldedcontig_487	1
s_1_1_contig4655	s_1_1NewScaffoldedcontig_487	18693
s_1_1_contig23689	s_1_1NewScaffoldedcontig_487	21107
s_1_1_contig26745	s_1_1NewScaffoldedcontig_487	22599
s_1_1_contig165517	s_1_1NewScaffoldedcontig_487	24350
s_1_1_contig168633	s_1_1NewScaffoldedcontig_487	29450
s_1_1_contig138199	s_1_1NewScaffoldedcontig_487	31286
s_1_1_contig252040	s_1_1NewScaffoldedcontig_488	1
s_1_1_contig23288	s_1_1NewScaffoldedcontig_489	1
s_1_1_contig97271	s_1_1NewScaffoldedcontig_489	1527
s_1_1_contig94648	s_1_1NewScaffoldedcontig_489	9564
s_1_1_contig190622	s_1_1NewScaffoldedcontig_492	18
s_1_1_contig232626	s_1_1NewScaffoldedcontig_492	1241
s_1_1_contig103260	s_1_1NewScaffoldedcontig_492	3597
s_1_1_contig53570	s_1_1NewScaffoldedcontig_492	6346
s_1_1_contig147241	s_1_1NewScaffoldedcontig_492	13516
s_1_1_contig15417	s_1_1NewScaffoldedcontig_492	17991
s_1_1_contig131215	s_1_1NewScaffoldedcontig_492	19870
s_1_1_contig191758	s_1_1NewScaffoldedcontig_492	27199
s_1_1_contig213232	s_1_1NewScaffoldedcontig_493	10624
s_1_1_contig85704	s_1_1NewScaffoldedcontig_494	176
s_1_1_contig174889	s_1_1NewScaffoldedcontig_494	6393
s_1_1_contig202271	s_1_1NewScaffoldedcontig_494	10709
s_1_1_contig18580	s_1_1NewScaffoldedcontig_495	1661
s_1_1_contig10533	s_1_1NewScaffoldedcontig_495	5745
s_1_1_contig148249	s_1_1NewScaffoldedcontig_495	8826
s_1_1_contig142155	s_1_1NewScaffoldedcontig_496	396
s_1_1_contig171758	s_1_1NewScaffoldedcontig_499	20337
s_1_1_contig179337	s_1_1NewScaffoldedcontig_503	62
s_1_1_contig178932	s_1_1NewScaffoldedcontig_505	1
s_1_1_contig160293	s_1_1NewScaffoldedcontig_508	47598
s_1_1_contig229032	s_1_1NewScaffoldedcontig_508	49522
s_1_1_contig124458	s_1_1NewScaffoldedcontig_509	1
s_1_1_contig138233	s_1_1NewScaffoldedcontig_510	1508
s_1_1_contig131040	s_1_1NewScaffoldedcontig_510	5962
s_1_1_contig231898	s_1_1NewScaffoldedcontig_510	8885
s_1_1_contig54514	s_1_1NewScaffoldedcontig_510	9528
s_1_1_contig172845	s_1_1NewScaffoldedcontig_511	11
s_1_1_contig240717	s_1_1NewScaffoldedcontig_512	4416
s_1_1_contig238363	s_1_1NewScaffoldedcontig_513	228
s_1_1_contig134375	s_1_1NewScaffoldedcontig_513	1232
s_1_1_contig222225	s_1_1NewScaffoldedcontig_514	34
s_1_1_contig94517	s_1_1NewScaffoldedcontig_514	3582
s_1_1_contig21314	s_1_1NewScaffoldedcontig_514	11535
s_1_1_contig276761	s_1_1NewScaffoldedcontig_514	16182
s_1_1_contig160154	s_1_1NewScaffoldedcontig_514	17514
s_1_1_contig241749	s_1_1NewScaffoldedcontig_515	112
s_1_1_contig216599	s_1_1NewScaffoldedcontig_516	19621
s_1_1_contig192401	s_1_1NewScaffoldedcontig_517	1926
s_1_1_contig272305	s_1_1NewScaffoldedcontig_517	7987
s_1_1_contig278694	s_1_1NewScaffoldedcontig_517	11697
s_1_1_contig250643	s_1_1NewScaffoldedcontig_517	12538
s_1_1_contig257746	s_1_1NewScaffoldedcontig_517	14632
s_1_1_contig52997	s_1_1NewScaffoldedcontig_517	15006
s_1_1_contig45590	s_1_1NewScaffoldedcontig_517	17528
s_1_1_contig29633	s_1_1NewScaffoldedcontig_517	18906
s_1_1_contig23663	s_1_1NewScaffoldedcontig_517	19637
s_1_1_contig168451	s_1_1NewScaffoldedcontig_517	21596
s_1_1_contig203664	s_1_1NewScaffoldedcontig_518	1028
s_1_1_contig220843	s_1_1NewScaffoldedcontig_519	3465
s_1_1_contig111994	s_1_1NewScaffoldedcontig_519	7885
s_1_1_contig187116	s_1_1NewScaffoldedcontig_520	26095
s_1_1_contig232255	s_1_1NewScaffoldedcontig_520	29413
s_1_1_contig126102	s_1_1NewScaffoldedcontig_522	1
s_1_1_contig145615	s_1_1NewScaffoldedcontig_522	5945
s_1_1_contig133378	s_1_1NewScaffoldedcontig_522	8693
s_1_1_contig16704	s_1_1NewScaffoldedcontig_522	12061
s_1_1_contig102623	s_1_1NewScaffoldedcontig_523	241
s_1_1_contig35009	s_1_1NewScaffoldedcontig_523	7769
s_1_1_contig65705	s_1_1NewScaffoldedcontig_524	9973
s_1_1_contig124342	s_1_1NewScaffoldedcontig_524	15254
s_1_1_contig116312	s_1_1NewScaffoldedcontig_524	20206
s_1_1_contig134743	s_1_1NewScaffoldedcontig_524	28829
s_1_1_contig8065	s_1_1NewScaffoldedcontig_524	31891
s_1_1_contig257613	s_1_1NewScaffoldedcontig_527	1993
s_1_1_contig225966	s_1_1NewScaffoldedcontig_528	24510
s_1_1_contig227712	s_1_1NewScaffoldedcontig_528	26721
s_1_1_contig124461	s_1_1NewScaffoldedcontig_529	25
s_1_1_contig265109	s_1_1NewScaffoldedcontig_529	7768
s_1_1_contig229033	s_1_1NewScaffoldedcontig_529	11576
s_1_1_contig72640	s_1_1NewScaffoldedcontig_529	13656
s_1_1_contig224143	s_1_1NewScaffoldedcontig_529	45921
s_1_1_contig149952	s_1_1NewScaffoldedcontig_531	1668
s_1_1_contig259379	s_1_1NewScaffoldedcontig_531	2621
s_1_1_contig7506	s_1_1NewScaffoldedcontig_531	6760
s_1_1_contig14636	s_1_1NewScaffoldedcontig_531	10125
s_1_1_contig189970	s_1_1NewScaffoldedcontig_531	12152
s_1_1_contig51041	s_1_1NewScaffoldedcontig_531	14671
s_1_1_contig96275	s_1_1NewScaffoldedcontig_531	20638
s_1_1_contig223021	s_1_1NewScaffoldedcontig_531	28406
s_1_1_contig133422	s_1_1NewScaffoldedcontig_531	62649
s_1_1_contig159453	s_1_1NewScaffoldedcontig_532	1
s_1_1_contig75244	s_1_1NewScaffoldedcontig_533	12514
s_1_1_contig76312	s_1_1NewScaffoldedcontig_534	5
s_1_1_contig265680	s_1_1NewScaffoldedcontig_535	1
s_1_1_contig18285	s_1_1NewScaffoldedcontig_536	1
s_1_1_contig18415	s_1_1NewScaffoldedcontig_536	6060
s_1_1_contig199169	s_1_1NewScaffoldedcontig_536	8364
s_1_1_contig61170	s_1_1NewScaffoldedcontig_536	10311
s_1_1_contig131386	s_1_1NewScaffoldedcontig_536	13483
s_1_1_contig200739	s_1_1NewScaffoldedcontig_536	16695
s_1_1_contig23522	s_1_1NewScaffoldedcontig_536	17560
s_1_1_contig52111	s_1_1NewScaffoldedcontig_536	31705
s_1_1_contig63985	s_1_1NewScaffoldedcontig_536	36672
s_1_1_contig199449	s_1_1NewScaffoldedcontig_537	4101
s_1_1_contig37284	s_1_1NewScaffoldedcontig_537	4698
s_1_1_contig81327	s_1_1NewScaffoldedcontig_538	4265
s_1_1_contig231425	s_1_1NewScaffoldedcontig_538	13283
s_1_1_contig134247	s_1_1NewScaffoldedcontig_540	1
s_1_1_contig89311	s_1_1NewScaffoldedcontig_540	13730
s_1_1_contig32198	s_1_1NewScaffoldedcontig_540	19537
s_1_1_contig164049	s_1_1NewScaffoldedcontig_540	21115
s_1_1_contig100399	s_1_1NewScaffoldedcontig_540	30519
s_1_1_contig222169	s_1_1NewScaffoldedcontig_540	36049
s_1_1_contig215581	s_1_1NewScaffoldedcontig_541	37
s_1_1_contig181918	s_1_1NewScaffoldedcontig_541	2313
s_1_1_contig93443	s_1_1NewScaffoldedcontig_541	5427
s_1_1_contig130020	s_1_1NewScaffoldedcontig_541	12355
s_1_1_contig60917	s_1_1NewScaffoldedcontig_541	17522
s_1_1_contig107386	s_1_1NewScaffoldedcontig_541	18915
s_1_1_contig220276	s_1_1NewScaffoldedcontig_542	16480
s_1_1_contig74839	s_1_1NewScaffoldedcontig_543	149
s_1_1_contig158992	s_1_1NewScaffoldedcontig_545	40554
s_1_1_contig135632	s_1_1NewScaffoldedcontig_545	47372
s_1_1_contig89283	s_1_1NewScaffoldedcontig_546	76
s_1_1_contig117766	s_1_1NewScaffoldedcontig_548	1
s_1_1_contig213679	s_1_1NewScaffoldedcontig_548	4562
s_1_1_contig78754	s_1_1NewScaffoldedcontig_548	5561
s_1_1_contig108850	s_1_1NewScaffoldedcontig_548	10971
s_1_1_contig77042	s_1_1NewScaffoldedcontig_550	1
s_1_1_contig58608	s_1_1NewScaffoldedcontig_550	7368
s_1_1_contig257623	s_1_1NewScaffoldedcontig_551	102
s_1_1_contig51215	s_1_1NewScaffoldedcontig_554	13570
s_1_1_contig171150	s_1_1NewScaffoldedcontig_554	18463
s_1_1_contig16285	s_1_1NewScaffoldedcontig_554	20028
s_1_1_contig246934	s_1_1NewScaffoldedcontig_554	24016
s_1_1_contig267305	s_1_1NewScaffoldedcontig_554	25053
s_1_1_contig109053	s_1_1NewScaffoldedcontig_555	1
s_1_1_contig162299	s_1_1NewScaffoldedcontig_555	7193
s_1_1_contig124751	s_1_1NewScaffoldedcontig_555	10801
s_1_1_contig226484	s_1_1NewScaffoldedcontig_556	84
s_1_1_contig212169	s_1_1NewScaffoldedcontig_557	1
s_1_1_contig157304	s_1_1NewScaffoldedcontig_559	571
s_1_1_contig65036	s_1_1NewScaffoldedcontig_559	4228
s_1_1_contig178123	s_1_1NewScaffoldedcontig_559	5974
s_1_1_contig170181	s_1_1NewScaffoldedcontig_559	6700
s_1_1_contig30411	s_1_1NewScaffoldedcontig_560	15045
s_1_1_contig32467	s_1_1NewScaffoldedcontig_560	16553
s_1_1_contig80346	s_1_1NewScaffoldedcontig_560	19462
s_1_1_contig143524	s_1_1NewScaffoldedcontig_560	26619
s_1_1_contig72707	s_1_1NewScaffoldedcontig_560	38800
s_1_1_contig238649	s_1_1NewScaffoldedcontig_560	45309
s_1_1_contig227963	s_1_1NewScaffoldedcontig_561	507
s_1_1_contig215206	s_1_1NewScaffoldedcontig_562	1
s_1_1_contig246502	s_1_1NewScaffoldedcontig_563	1
s_1_1_contig242688	s_1_1NewScaffoldedcontig_563	724
s_1_1_contig218216	s_1_1NewScaffoldedcontig_563	2183
s_1_1_contig241213	s_1_1NewScaffoldedcontig_564	184
s_1_1_contig4883	s_1_1NewScaffoldedcontig_565	25263
s_1_1_contig219580	s_1_1NewScaffoldedcontig_566	14063
s_1_1_contig154465	s_1_1NewScaffoldedcontig_567	1
s_1_1_contig210328	s_1_1NewScaffoldedcontig_568	70
s_1_1_contig109302	s_1_1NewScaffoldedcontig_571	20118
s_1_1_contig41596	s_1_1NewScaffoldedcontig_572	242
s_1_1_contig251226	s_1_1NewScaffoldedcontig_572	4903
s_1_1_contig153249	s_1_1NewScaffoldedcontig_573	1
s_1_1_contig273903	s_1_1NewScaffoldedcontig_573	2795
s_1_1_contig275210	s_1_1NewScaffoldedcontig_574	3037
s_1_1_contig217038	s_1_1NewScaffoldedcontig_575	1
s_1_1_contig257087	s_1_1NewScaffoldedcontig_576	22074
s_1_1_contig124201	s_1_1NewScaffoldedcontig_576	22661
s_1_1_contig22811	s_1_1NewScaffoldedcontig_576	30838
s_1_1_contig215194	s_1_1NewScaffoldedcontig_577	3398
s_1_1_contig280611	s_1_1NewScaffoldedcontig_577	7492
s_1_1_contig102392	s_1_1NewScaffoldedcontig_578	14006
s_1_1_contig138668	s_1_1NewScaffoldedcontig_579	13904
s_1_1_contig105351	s_1_1NewScaffoldedcontig_579	16116
s_1_1_contig264864	s_1_1NewScaffoldedcontig_579	23827
s_1_1_contig142563	s_1_1NewScaffoldedcontig_579	30028
s_1_1_contig67353	s_1_1NewScaffoldedcontig_580	30
s_1_1_contig261975	s_1_1NewScaffoldedcontig_581	31
s_1_1_contig220200	s_1_1NewScaffoldedcontig_581	3257
s_1_1_contig242911	s_1_1NewScaffoldedcontig_582	16769
s_1_1_contig141157	s_1_1NewScaffoldedcontig_584	143
s_1_1_contig5392	s_1_1NewScaffoldedcontig_584	44273
s_1_1_contig55932	s_1_1NewScaffoldedcontig_584	56137
s_1_1_contig165049	s_1_1NewScaffoldedcontig_584	71575
s_1_1_contig190947	s_1_1NewScaffoldedcontig_585	1
s_1_1_contig151386	s_1_1NewScaffoldedcontig_585	2584
s_1_1_contig196702	s_1_1NewScaffoldedcontig_585	6021
s_1_1_contig137615	s_1_1NewScaffoldedcontig_585	7282
s_1_1_contig150163	s_1_1NewScaffoldedcontig_585	7587
s_1_1_contig273420	s_1_1NewScaffoldedcontig_585	8535
s_1_1_contig120377	s_1_1NewScaffoldedcontig_585	10233
s_1_1_contig168995	s_1_1NewScaffoldedcontig_586	36
s_1_1_contig27069	s_1_1NewScaffoldedcontig_586	3413
s_1_1_contig209381	s_1_1NewScaffoldedcontig_586	5764
s_1_1_contig122691	s_1_1NewScaffoldedcontig_587	1
s_1_1_contig116065	s_1_1NewScaffoldedcontig_587	5833
s_1_1_contig202556	s_1_1NewScaffoldedcontig_587	27683
s_1_1_contig102115	s_1_1NewScaffoldedcontig_588	1
s_1_1_contig170507	s_1_1NewScaffoldedcontig_589	1
s_1_1_contig198041	s_1_1NewScaffoldedcontig_589	3530
s_1_1_contig142302	s_1_1NewScaffoldedcontig_589	5059
s_1_1_contig234333	s_1_1NewScaffoldedcontig_589	8082
s_1_1_contig247180	s_1_1NewScaffoldedcontig_589	11066
s_1_1_contig190404	s_1_1NewScaffoldedcontig_589	12484
s_1_1_contig29775	s_1_1NewScaffoldedcontig_589	14785
s_1_1_contig199859	s_1_1NewScaffoldedcontig_589	20158
s_1_1_contig23768	s_1_1NewScaffoldedcontig_589	24991
s_1_1_contig203164	s_1_1NewScaffoldedcontig_589	27230
s_1_1_contig56001	s_1_1NewScaffoldedcontig_589	28734
s_1_1_contig136930	s_1_1NewScaffoldedcontig_590	1
s_1_1_contig78494	s_1_1NewScaffoldedcontig_590	5144
s_1_1_contig52234	s_1_1NewScaffoldedcontig_590	12123
s_1_1_contig168627	s_1_1NewScaffoldedcontig_590	20877
s_1_1_contig124048	s_1_1NewScaffoldedcontig_590	36976
s_1_1_contig111156	s_1_1NewScaffoldedcontig_591	1881
s_1_1_contig43863	s_1_1NewScaffoldedcontig_591	5242
s_1_1_contig143255	s_1_1NewScaffoldedcontig_591	6258
s_1_1_contig226935	s_1_1NewScaffoldedcontig_592	3818
s_1_1_contig132463	s_1_1NewScaffoldedcontig_592	5223
s_1_1_contig151929	s_1_1NewScaffoldedcontig_594	13602
s_1_1_contig220442	s_1_1NewScaffoldedcontig_595	5741
s_1_1_contig188458	s_1_1NewScaffoldedcontig_596	873
s_1_1_contig237452	s_1_1NewScaffoldedcontig_596	4616
s_1_1_contig256547	s_1_1NewScaffoldedcontig_596	5184
s_1_1_contig206849	s_1_1NewScaffoldedcontig_596	5266
s_1_1_contig35079	s_1_1NewScaffoldedcontig_598	1
s_1_1_contig98788	s_1_1NewScaffoldedcontig_598	7740
s_1_1_contig48459	s_1_1NewScaffoldedcontig_600	1
s_1_1_contig61011	s_1_1NewScaffoldedcontig_600	1791
s_1_1_contig99763	s_1_1NewScaffoldedcontig_600	8519
s_1_1_contig168419	s_1_1NewScaffoldedcontig_600	21489
s_1_1_contig18956	s_1_1NewScaffoldedcontig_600	24546
s_1_1_contig86680	s_1_1NewScaffoldedcontig_600	26689
s_1_1_contig252229	s_1_1NewScaffoldedcontig_600	29703
s_1_1_contig25695	s_1_1NewScaffoldedcontig_600	32092
s_1_1_contig216454	s_1_1NewScaffoldedcontig_600	32683
s_1_1_contig144002	s_1_1NewScaffoldedcontig_600	34966
s_1_1_contig96345	s_1_1NewScaffoldedcontig_600	38592
s_1_1_contig170657	s_1_1NewScaffoldedcontig_600	46257
s_1_1_contig236080	s_1_1NewScaffoldedcontig_600	48275
s_1_1_contig51696	s_1_1NewScaffoldedcontig_600	49671
s_1_1_contig144963	s_1_1NewScaffoldedcontig_600	54453
s_1_1_contig6008	s_1_1NewScaffoldedcontig_600	56224
s_1_1_contig86372	s_1_1NewScaffoldedcontig_600	57392
s_1_1_contig140130	s_1_1NewScaffoldedcontig_600	62527
s_1_1_contig118195	s_1_1NewScaffoldedcontig_602	7676
s_1_1_contig102627	s_1_1NewScaffoldedcontig_602	25282
s_1_1_contig105641	s_1_1NewScaffoldedcontig_602	30193
s_1_1_contig201995	s_1_1NewScaffoldedcontig_603	18182
s_1_1_contig101922	s_1_1NewScaffoldedcontig_604	1
s_1_1_contig79915	s_1_1NewScaffoldedcontig_606	174
s_1_1_contig194721	s_1_1NewScaffoldedcontig_606	9420
s_1_1_contig48732	s_1_1NewScaffoldedcontig_606	10741
s_1_1_contig148341	s_1_1NewScaffoldedcontig_606	30979
s_1_1_contig74628	s_1_1NewScaffoldedcontig_607	1
s_1_1_contig124856	s_1_1NewScaffoldedcontig_607	10541
s_1_1_contig157199	s_1_1NewScaffoldedcontig_609	1
s_1_1_contig256981	s_1_1NewScaffoldedcontig_611	53
s_1_1_contig117473	s_1_1NewScaffoldedcontig_612	2075
s_1_1_contig43400	s_1_1NewScaffoldedcontig_612	3992
s_1_1_contig265916	s_1_1NewScaffoldedcontig_612	4563
s_1_1_contig42982	s_1_1NewScaffoldedcontig_612	7304
s_1_1_contig24746	s_1_1NewScaffoldedcontig_612	8970
s_1_1_contig141369	s_1_1NewScaffoldedcontig_612	9930
s_1_1_contig255860	s_1_1NewScaffoldedcontig_612	13630
s_1_1_contig150920	s_1_1NewScaffoldedcontig_613	144
s_1_1_contig222975	s_1_1NewScaffoldedcontig_613	5440
s_1_1_contig37705	s_1_1NewScaffoldedcontig_613	7119
s_1_1_contig217873	s_1_1NewScaffoldedcontig_613	8075
s_1_1_contig122160	s_1_1NewScaffoldedcontig_614	5332
s_1_1_contig218246	s_1_1NewScaffoldedcontig_615	5456
s_1_1_contig214524	s_1_1NewScaffoldedcontig_615	10950
s_1_1_contig94807	s_1_1NewScaffoldedcontig_616	10007
s_1_1_contig119260	s_1_1NewScaffoldedcontig_617	28
s_1_1_contig19859	s_1_1NewScaffoldedcontig_619	10858
s_1_1_contig271888	s_1_1NewScaffoldedcontig_619	16777
s_1_1_contig114106	s_1_1NewScaffoldedcontig_621	740
s_1_1_contig13556	s_1_1NewScaffoldedcontig_621	10213
s_1_1_contig193791	s_1_1NewScaffoldedcontig_621	12901
s_1_1_contig50813	s_1_1NewScaffoldedcontig_621	18688
s_1_1_contig58224	s_1_1NewScaffoldedcontig_621	22316
s_1_1_contig174844	s_1_1NewScaffoldedcontig_621	26628
s_1_1_contig200311	s_1_1NewScaffoldedcontig_621	29053
s_1_1_contig111629	s_1_1NewScaffoldedcontig_621	37449
s_1_1_contig49668	s_1_1NewScaffoldedcontig_621	41275
s_1_1_contig270930	s_1_1NewScaffoldedcontig_621	44233
s_1_1_contig253389	s_1_1NewScaffoldedcontig_623	7007
s_1_1_contig212042	s_1_1NewScaffoldedcontig_623	7198
s_1_1_contig246807	s_1_1NewScaffoldedcontig_623	7786
s_1_1_contig214095	s_1_1NewScaffoldedcontig_623	8457
s_1_1_contig238588	s_1_1NewScaffoldedcontig_625	1
s_1_1_contig116061	s_1_1NewScaffoldedcontig_625	3608
s_1_1_contig218328	s_1_1NewScaffoldedcontig_625	10079
s_1_1_contig247471	s_1_1NewScaffoldedcontig_626	20
s_1_1_contig75768	s_1_1NewScaffoldedcontig_627	1
s_1_1_contig128135	s_1_1NewScaffoldedcontig_627	4197
s_1_1_contig195174	s_1_1NewScaffoldedcontig_629	15668
s_1_1_contig159506	s_1_1NewScaffoldedcontig_632	13750
s_1_1_contig270646	s_1_1NewScaffoldedcontig_633	1
s_1_1_contig54992	s_1_1NewScaffoldedcontig_633	13252
s_1_1_contig146042	s_1_1NewScaffoldedcontig_635	6404
s_1_1_contig152407	s_1_1NewScaffoldedcontig_635	9515
s_1_1_contig130770	s_1_1NewScaffoldedcontig_635	11897
s_1_1_contig109411	s_1_1NewScaffoldedcontig_635	13882
s_1_1_contig189888	s_1_1NewScaffoldedcontig_636	421
s_1_1_contig281639	s_1_1NewScaffoldedcontig_636	421
s_1_1_contig173158	s_1_1NewScaffoldedcontig_636	421
s_1_1_contig257919	s_1_1NewScaffoldedcontig_636	2064
s_1_1_contig255066	s_1_1NewScaffoldedcontig_636	2675
s_1_1_contig76637	s_1_1NewScaffoldedcontig_639	1
s_1_1_contig3710	s_1_1NewScaffoldedcontig_639	2503
s_1_1_contig267691	s_1_1NewScaffoldedcontig_640	23
s_1_1_contig91565	s_1_1NewScaffoldedcontig_640	1929
s_1_1_contig128162	s_1_1NewScaffoldedcontig_641	21409
s_1_1_contig8097	s_1_1NewScaffoldedcontig_641	26055
s_1_1_contig91326	s_1_1NewScaffoldedcontig_641	27908
s_1_1_contig10243	s_1_1NewScaffoldedcontig_641	31763
s_1_1_contig57854	s_1_1NewScaffoldedcontig_642	1196
s_1_1_contig261694	s_1_1NewScaffoldedcontig_643	2858
s_1_1_contig148929	s_1_1NewScaffoldedcontig_649	19
s_1_1_contig216327	s_1_1NewScaffoldedcontig_649	11268
s_1_1_contig109192	s_1_1NewScaffoldedcontig_650	1
s_1_1_contig260338	s_1_1NewScaffoldedcontig_653	10980
s_1_1_contig228977	s_1_1NewScaffoldedcontig_653	11508
s_1_1_contig138393	s_1_1NewScaffoldedcontig_653	13943
s_1_1_contig264609	s_1_1NewScaffoldedcontig_653	26457
s_1_1_contig109937	s_1_1NewScaffoldedcontig_654	43
s_1_1_contig83504	s_1_1NewScaffoldedcontig_654	3548
s_1_1_contig118973	s_1_1NewScaffoldedcontig_654	11767
s_1_1_contig27884	s_1_1NewScaffoldedcontig_654	16031
s_1_1_contig7918	s_1_1NewScaffoldedcontig_654	18166
s_1_1_contig140884	s_1_1NewScaffoldedcontig_654	19458
s_1_1_contig159074	s_1_1NewScaffoldedcontig_654	22634
s_1_1_contig80637	s_1_1NewScaffoldedcontig_654	27645
s_1_1_contig228436	s_1_1NewScaffoldedcontig_655	1
s_1_1_contig228958	s_1_1NewScaffoldedcontig_656	32
s_1_1_contig200872	s_1_1NewScaffoldedcontig_657	1
s_1_1_contig232368	s_1_1NewScaffoldedcontig_657	931
s_1_1_contig220275	s_1_1NewScaffoldedcontig_657	3935
s_1_1_contig115235	s_1_1NewScaffoldedcontig_659	1
s_1_1_contig251695	s_1_1NewScaffoldedcontig_659	3830
s_1_1_contig272179	s_1_1NewScaffoldedcontig_659	4508
s_1_1_contig176486	s_1_1NewScaffoldedcontig_659	19366
s_1_1_contig131452	s_1_1NewScaffoldedcontig_661	1
s_1_1_contig193844	s_1_1NewScaffoldedcontig_662	4035
s_1_1_contig100013	s_1_1NewScaffoldedcontig_662	9149
s_1_1_contig105263	s_1_1NewScaffoldedcontig_665	1
s_1_1_contig118628	s_1_1NewScaffoldedcontig_667	1
s_1_1_contig224565	s_1_1NewScaffoldedcontig_667	7969
s_1_1_contig77765	s_1_1NewScaffoldedcontig_667	12047
s_1_1_contig211844	s_1_1NewScaffoldedcontig_668	1
s_1_1_contig50233	s_1_1NewScaffoldedcontig_668	4669
s_1_1_contig28502	s_1_1NewScaffoldedcontig_668	11117
s_1_1_contig419	s_1_1NewScaffoldedcontig_668	11847
s_1_1_contig181208	s_1_1NewScaffoldedcontig_668	13034
s_1_1_contig254797	s_1_1NewScaffoldedcontig_670	1
s_1_1_contig112147	s_1_1NewScaffoldedcontig_670	351
s_1_1_contig231250	s_1_1NewScaffoldedcontig_671	22
s_1_1_contig34896	s_1_1NewScaffoldedcontig_671	1822
s_1_1_contig98037	s_1_1NewScaffoldedcontig_672	177
s_1_1_contig214954	s_1_1NewScaffoldedcontig_673	4924
s_1_1_contig257255	s_1_1NewScaffoldedcontig_673	4924
s_1_1_contig185991	s_1_1NewScaffoldedcontig_674	178
s_1_1_contig109710	s_1_1NewScaffoldedcontig_675	3419
s_1_1_contig250458	s_1_1NewScaffoldedcontig_675	7023
s_1_1_contig138630	s_1_1NewScaffoldedcontig_675	7863
s_1_1_contig207170	s_1_1NewScaffoldedcontig_675	9628
s_1_1_contig253789	s_1_1NewScaffoldedcontig_675	9926
s_1_1_contig252868	s_1_1NewScaffoldedcontig_675	9940
s_1_1_contig257646	s_1_1NewScaffoldedcontig_675	10377
s_1_1_contig201733	s_1_1NewScaffoldedcontig_675	12776
s_1_1_contig139862	s_1_1NewScaffoldedcontig_675	17780
s_1_1_contig235453	s_1_1NewScaffoldedcontig_675	20058
s_1_1_contig269601	s_1_1NewScaffoldedcontig_675	21892
s_1_1_contig1326	s_1_1NewScaffoldedcontig_675	23301
s_1_1_contig237281	s_1_1NewScaffoldedcontig_675	24210
s_1_1_contig272705	s_1_1NewScaffoldedcontig_675	25819
s_1_1_contig11402	s_1_1NewScaffoldedcontig_675	27532
s_1_1_contig9501	s_1_1NewScaffoldedcontig_675	29443
s_1_1_contig57102	s_1_1NewScaffoldedcontig_675	30764
s_1_1_contig155450	s_1_1NewScaffoldedcontig_675	32578
s_1_1_contig270063	s_1_1NewScaffoldedcontig_675	37198
s_1_1_contig25688	s_1_1NewScaffoldedcontig_675	38284
s_1_1_contig120002	s_1_1NewScaffoldedcontig_675	39059
s_1_1_contig138181	s_1_1NewScaffoldedcontig_675	46800
s_1_1_contig92025	s_1_1NewScaffoldedcontig_676	1
s_1_1_contig221834	s_1_1NewScaffoldedcontig_677	24
s_1_1_contig70866	s_1_1NewScaffoldedcontig_677	4661
s_1_1_contig223866	s_1_1NewScaffoldedcontig_677	11289
s_1_1_contig77815	s_1_1NewScaffoldedcontig_677	25196
s_1_1_contig139299	s_1_1NewScaffoldedcontig_677	30861
s_1_1_contig80780	s_1_1NewScaffoldedcontig_679	3722
s_1_1_contig52593	s_1_1NewScaffoldedcontig_679	10824
s_1_1_contig191719	s_1_1NewScaffoldedcontig_679	28564
s_1_1_contig130407	s_1_1NewScaffoldedcontig_679	30377
s_1_1_contig182741	s_1_1NewScaffoldedcontig_680	1
s_1_1_contig246780	s_1_1NewScaffoldedcontig_680	3604
s_1_1_contig167838	s_1_1NewScaffoldedcontig_680	4517
s_1_1_contig77856	s_1_1NewScaffoldedcontig_682	1
s_1_1_contig201928	s_1_1NewScaffoldedcontig_682	34731
s_1_1_contig127642	s_1_1NewScaffoldedcontig_683	297
s_1_1_contig35347	s_1_1NewScaffoldedcontig_683	3025
s_1_1_contig265751	s_1_1NewScaffoldedcontig_683	4650
s_1_1_contig214212	s_1_1NewScaffoldedcontig_684	3673
s_1_1_contig13372	s_1_1NewScaffoldedcontig_684	4796
s_1_1_contig275979	s_1_1NewScaffoldedcontig_684	8563
s_1_1_contig226771	s_1_1NewScaffoldedcontig_684	10637
s_1_1_contig28691	s_1_1NewScaffoldedcontig_684	19238
s_1_1_contig78935	s_1_1NewScaffoldedcontig_685	22604
s_1_1_contig50276	s_1_1NewScaffoldedcontig_686	1
s_1_1_contig225560	s_1_1NewScaffoldedcontig_687	1
s_1_1_contig88837	s_1_1NewScaffoldedcontig_687	2908
s_1_1_contig37672	s_1_1NewScaffoldedcontig_687	10896
s_1_1_contig91140	s_1_1NewScaffoldedcontig_688	34
s_1_1_contig229041	s_1_1NewScaffoldedcontig_689	1
s_1_1_contig261978	s_1_1NewScaffoldedcontig_689	21689
s_1_1_contig145277	s_1_1NewScaffoldedcontig_691	10
s_1_1_contig164596	s_1_1NewScaffoldedcontig_691	1718
s_1_1_contig105709	s_1_1NewScaffoldedcontig_691	12176
s_1_1_contig62346	s_1_1NewScaffoldedcontig_692	1
s_1_1_contig39521	s_1_1NewScaffoldedcontig_692	13094
s_1_1_contig109769	s_1_1NewScaffoldedcontig_693	1
s_1_1_contig11265	s_1_1NewScaffoldedcontig_694	1
s_1_1_contig189445	s_1_1NewScaffoldedcontig_695	6677
s_1_1_contig189567	s_1_1NewScaffoldedcontig_696	2924
s_1_1_contig271514	s_1_1NewScaffoldedcontig_697	18
s_1_1_contig186602	s_1_1NewScaffoldedcontig_699	437
s_1_1_contig225526	s_1_1NewScaffoldedcontig_702	1
s_1_1_contig207538	s_1_1NewScaffoldedcontig_704	418
s_1_1_contig258672	s_1_1NewScaffoldedcontig_704	662
s_1_1_contig207100	s_1_1NewScaffoldedcontig_704	694
s_1_1_contig257427	s_1_1NewScaffoldedcontig_704	784
s_1_1_contig197564	s_1_1NewScaffoldedcontig_704	5495
s_1_1_contig228476	s_1_1NewScaffoldedcontig_705	8113
s_1_1_contig208579	s_1_1NewScaffoldedcontig_705	20183
s_1_1_contig99052	s_1_1NewScaffoldedcontig_705	33823
s_1_1_contig242868	s_1_1NewScaffoldedcontig_706	60
s_1_1_contig216517	s_1_1NewScaffoldedcontig_707	9684
s_1_1_contig119000	s_1_1NewScaffoldedcontig_708	508
s_1_1_contig106667	s_1_1NewScaffoldedcontig_708	2823
s_1_1_contig263617	s_1_1NewScaffoldedcontig_709	30
s_1_1_contig160924	s_1_1NewScaffoldedcontig_709	6204
s_1_1_contig195227	s_1_1NewScaffoldedcontig_709	41088
s_1_1_contig123365	s_1_1NewScaffoldedcontig_709	43421
s_1_1_contig271001	s_1_1NewScaffoldedcontig_709	45769
s_1_1_contig167438	s_1_1NewScaffoldedcontig_709	49896
s_1_1_contig145629	s_1_1NewScaffoldedcontig_713	1
s_1_1_contig153312	s_1_1NewScaffoldedcontig_713	3839
s_1_1_contig231794	s_1_1NewScaffoldedcontig_713	5401
s_1_1_contig216068	s_1_1NewScaffoldedcontig_713	9205
s_1_1_contig52570	s_1_1NewScaffoldedcontig_713	16721
s_1_1_contig201636	s_1_1NewScaffoldedcontig_713	20705
s_1_1_contig83121	s_1_1NewScaffoldedcontig_713	21772
s_1_1_contig219735	s_1_1NewScaffoldedcontig_715	14773
s_1_1_contig104669	s_1_1NewScaffoldedcontig_716	115
s_1_1_contig260974	s_1_1NewScaffoldedcontig_719	19004
s_1_1_contig231256	s_1_1NewScaffoldedcontig_719	33085
s_1_1_contig27829	s_1_1NewScaffoldedcontig_720	17399
s_1_1_contig228892	s_1_1NewScaffoldedcontig_720	19276
s_1_1_contig35480	s_1_1NewScaffoldedcontig_720	24320
s_1_1_contig137032	s_1_1NewScaffoldedcontig_720	25200
s_1_1_contig109844	s_1_1NewScaffoldedcontig_720	30089
s_1_1_contig33696	s_1_1NewScaffoldedcontig_720	33174
s_1_1_contig6984	s_1_1NewScaffoldedcontig_720	39725
s_1_1_contig114625	s_1_1NewScaffoldedcontig_720	45033
s_1_1_contig209953	s_1_1NewScaffoldedcontig_724	3956
s_1_1_contig86277	s_1_1NewScaffoldedcontig_724	7713
s_1_1_contig180609	s_1_1NewScaffoldedcontig_724	14844
s_1_1_contig127609	s_1_1NewScaffoldedcontig_726	19472
s_1_1_contig157737	s_1_1NewScaffoldedcontig_728	1
s_1_1_contig133006	s_1_1NewScaffoldedcontig_729	1
s_1_1_contig209206	s_1_1NewScaffoldedcontig_729	2767
s_1_1_contig216238	s_1_1NewScaffoldedcontig_730	809
s_1_1_contig128866	s_1_1NewScaffoldedcontig_731	1619
s_1_1_contig11389	s_1_1NewScaffoldedcontig_731	9120
s_1_1_contig268643	s_1_1NewScaffoldedcontig_731	10961
s_1_1_contig94345	s_1_1NewScaffoldedcontig_731	12299
s_1_1_contig67344	s_1_1NewScaffoldedcontig_732	1
s_1_1_contig181016	s_1_1NewScaffoldedcontig_732	44297
s_1_1_contig211449	s_1_1NewScaffoldedcontig_733	1947
s_1_1_contig195448	s_1_1NewScaffoldedcontig_734	1
s_1_1_contig80889	s_1_1NewScaffoldedcontig_734	2336
s_1_1_contig160891	s_1_1NewScaffoldedcontig_734	9182
s_1_1_contig64701	s_1_1NewScaffoldedcontig_734	13007
s_1_1_contig255197	s_1_1NewScaffoldedcontig_735	2226
s_1_1_contig214521	s_1_1NewScaffoldedcontig_735	2496
s_1_1_contig246875	s_1_1NewScaffoldedcontig_736	1
s_1_1_contig248535	s_1_1NewScaffoldedcontig_736	932
s_1_1_contig230540	s_1_1NewScaffoldedcontig_738	610
s_1_1_contig217419	s_1_1NewScaffoldedcontig_738	4182
s_1_1_contig159712	s_1_1NewScaffoldedcontig_738	12201
s_1_1_contig46136	s_1_1NewScaffoldedcontig_739	13526
s_1_1_contig261628	s_1_1NewScaffoldedcontig_740	1
s_1_1_contig232213	s_1_1NewScaffoldedcontig_740	6255
s_1_1_contig262367	s_1_1NewScaffoldedcontig_740	8426
s_1_1_contig163788	s_1_1NewScaffoldedcontig_744	1394
s_1_1_contig163183	s_1_1NewScaffoldedcontig_746	1
s_1_1_contig253928	s_1_1NewScaffoldedcontig_747	247
s_1_1_contig142250	s_1_1NewScaffoldedcontig_748	131
s_1_1_contig215498	s_1_1NewScaffoldedcontig_748	5099
s_1_1_contig154866	s_1_1NewScaffoldedcontig_748	12893
s_1_1_contig142521	s_1_1NewScaffoldedcontig_749	12191
s_1_1_contig129277	s_1_1NewScaffoldedcontig_751	1
s_1_1_contig80220	s_1_1NewScaffoldedcontig_752	1
s_1_1_contig155269	s_1_1NewScaffoldedcontig_752	13618
s_1_1_contig4850	s_1_1NewScaffoldedcontig_752	16010
s_1_1_contig269736	s_1_1NewScaffoldedcontig_752	22352
s_1_1_contig198609	s_1_1NewScaffoldedcontig_752	26141
s_1_1_contig56586	s_1_1NewScaffoldedcontig_753	357
s_1_1_contig259511	s_1_1NewScaffoldedcontig_753	4171
s_1_1_contig254314	s_1_1NewScaffoldedcontig_753	5116
s_1_1_contig108413	s_1_1NewScaffoldedcontig_753	7661
s_1_1_contig111338	s_1_1NewScaffoldedcontig_753	14664
s_1_1_contig134441	s_1_1NewScaffoldedcontig_753	22037
s_1_1_contig266647	s_1_1NewScaffoldedcontig_753	23903
s_1_1_contig126458	s_1_1NewScaffoldedcontig_753	27399
s_1_1_contig212156	s_1_1NewScaffoldedcontig_754	6317
s_1_1_contig254456	s_1_1NewScaffoldedcontig_754	6369
s_1_1_contig258457	s_1_1NewScaffoldedcontig_754	7806
s_1_1_contig219098	s_1_1NewScaffoldedcontig_755	1
s_1_1_contig3307	s_1_1NewScaffoldedcontig_755	8440
s_1_1_contig272533	s_1_1NewScaffoldedcontig_756	68712
s_1_1_contig68979	s_1_1NewScaffoldedcontig_756	77208
s_1_1_contig80329	s_1_1NewScaffoldedcontig_756	116811
s_1_1_contig9541	s_1_1NewScaffoldedcontig_757	1
s_1_1_contig164142	s_1_1NewScaffoldedcontig_757	3943
s_1_1_contig173321	s_1_1NewScaffoldedcontig_758	131
s_1_1_contig101004	s_1_1NewScaffoldedcontig_759	10772
s_1_1_contig179014	s_1_1NewScaffoldedcontig_760	449
s_1_1_contig120005	s_1_1NewScaffoldedcontig_760	1324
s_1_1_contig139915	s_1_1NewScaffoldedcontig_761	182
s_1_1_contig216046	s_1_1NewScaffoldedcontig_761	7469
s_1_1_contig83478	s_1_1NewScaffoldedcontig_762	1
s_1_1_contig224369	s_1_1NewScaffoldedcontig_763	9522
s_1_1_contig71445	s_1_1NewScaffoldedcontig_763	12541
s_1_1_contig195613	s_1_1NewScaffoldedcontig_765	2407
s_1_1_contig231867	s_1_1NewScaffoldedcontig_765	3836
s_1_1_contig204424	s_1_1NewScaffoldedcontig_766	12235
s_1_1_contig225569	s_1_1NewScaffoldedcontig_766	16470
s_1_1_contig101458	s_1_1NewScaffoldedcontig_766	18560
s_1_1_contig28420	s_1_1NewScaffoldedcontig_768	25
s_1_1_contig204184	s_1_1NewScaffoldedcontig_769	22
s_1_1_contig103727	s_1_1NewScaffoldedcontig_769	3643
s_1_1_contig73523	s_1_1NewScaffoldedcontig_770	4193
s_1_1_contig168055	s_1_1NewScaffoldedcontig_770	8732
s_1_1_contig66035	s_1_1NewScaffoldedcontig_770	11926
s_1_1_contig118443	s_1_1NewScaffoldedcontig_771	1
s_1_1_contig151741	s_1_1NewScaffoldedcontig_772	2934
s_1_1_contig145824	s_1_1NewScaffoldedcontig_775	1559
s_1_1_contig2341	s_1_1NewScaffoldedcontig_775	4707
s_1_1_contig93342	s_1_1NewScaffoldedcontig_775	16785
s_1_1_contig97976	s_1_1NewScaffoldedcontig_776	1
s_1_1_contig49338	s_1_1NewScaffoldedcontig_778	1
s_1_1_contig78995	s_1_1NewScaffoldedcontig_779	62
s_1_1_contig149878	s_1_1NewScaffoldedcontig_779	3626
s_1_1_contig215244	s_1_1NewScaffoldedcontig_779	7673
s_1_1_contig158103	s_1_1NewScaffoldedcontig_779	9918
s_1_1_contig9581	s_1_1NewScaffoldedcontig_780	1
s_1_1_contig24412	s_1_1NewScaffoldedcontig_780	2151
s_1_1_contig32142	s_1_1NewScaffoldedcontig_780	5950
s_1_1_contig235701	s_1_1NewScaffoldedcontig_780	7197
s_1_1_contig53884	s_1_1NewScaffoldedcontig_780	8911
s_1_1_contig215887	s_1_1NewScaffoldedcontig_784	1
s_1_1_contig194804	s_1_1NewScaffoldedcontig_785	46475
s_1_1_contig205884	s_1_1NewScaffoldedcontig_786	1
s_1_1_contig132712	s_1_1NewScaffoldedcontig_786	476
s_1_1_contig209390	s_1_1NewScaffoldedcontig_786	3682
s_1_1_contig179035	s_1_1NewScaffoldedcontig_786	5665
s_1_1_contig199587	s_1_1NewScaffoldedcontig_786	8837
s_1_1_contig231574	s_1_1NewScaffoldedcontig_788	2251
s_1_1_contig274250	s_1_1NewScaffoldedcontig_788	3756
s_1_1_contig29724	s_1_1NewScaffoldedcontig_788	4382
s_1_1_contig240757	s_1_1NewScaffoldedcontig_788	6243
s_1_1_contig172393	s_1_1NewScaffoldedcontig_788	6871
s_1_1_contig167679	s_1_1NewScaffoldedcontig_788	9362
s_1_1_contig150435	s_1_1NewScaffoldedcontig_788	13594
s_1_1_contig27826	s_1_1NewScaffoldedcontig_788	14827
s_1_1_contig130666	s_1_1NewScaffoldedcontig_788	15948
s_1_1_contig91729	s_1_1NewScaffoldedcontig_788	24299
s_1_1_contig31112	s_1_1NewScaffoldedcontig_788	26866
s_1_1_contig208577	s_1_1NewScaffoldedcontig_788	30019
s_1_1_contig179305	s_1_1NewScaffoldedcontig_789	1
s_1_1_contig139804	s_1_1NewScaffoldedcontig_790	1
s_1_1_contig244664	s_1_1NewScaffoldedcontig_791	1
s_1_1_contig87325	s_1_1NewScaffoldedcontig_792	8060
s_1_1_contig176730	s_1_1NewScaffoldedcontig_793	1592
s_1_1_contig105695	s_1_1NewScaffoldedcontig_794	96
s_1_1_contig60623	s_1_1NewScaffoldedcontig_794	2904
s_1_1_contig133155	s_1_1NewScaffoldedcontig_795	11637
s_1_1_contig88616	s_1_1NewScaffoldedcontig_796	1622
s_1_1_contig223849	s_1_1NewScaffoldedcontig_796	121963
s_1_1_contig148795	s_1_1NewScaffoldedcontig_796	124301
s_1_1_contig191514	s_1_1NewScaffoldedcontig_800	1
s_1_1_contig20598	s_1_1NewScaffoldedcontig_800	1137
s_1_1_contig174756	s_1_1NewScaffoldedcontig_800	6328
s_1_1_contig267314	s_1_1NewScaffoldedcontig_800	8567
s_1_1_contig23164	s_1_1NewScaffoldedcontig_800	10171
s_1_1_contig59848	s_1_1NewScaffoldedcontig_802	1
s_1_1_contig122900	s_1_1NewScaffoldedcontig_802	5446
s_1_1_contig228898	s_1_1NewScaffoldedcontig_803	4617
s_1_1_contig227115	s_1_1NewScaffoldedcontig_803	6253
s_1_1_contig83566	s_1_1NewScaffoldedcontig_804	75
s_1_1_contig240227	s_1_1NewScaffoldedcontig_805	171
s_1_1_contig223578	s_1_1NewScaffoldedcontig_805	1493
s_1_1_contig192587	s_1_1NewScaffoldedcontig_805	6780
s_1_1_contig128391	s_1_1NewScaffoldedcontig_806	50
s_1_1_contig235363	s_1_1NewScaffoldedcontig_806	6554
s_1_1_contig220571	s_1_1NewScaffoldedcontig_807	18774
s_1_1_contig268008	s_1_1NewScaffoldedcontig_807	23873
s_1_1_contig208735	s_1_1NewScaffoldedcontig_808	14625
s_1_1_contig96399	s_1_1NewScaffoldedcontig_809	1
s_1_1_contig179845	s_1_1NewScaffoldedcontig_809	6918
s_1_1_contig159817	s_1_1NewScaffoldedcontig_809	10891
s_1_1_contig260988	s_1_1NewScaffoldedcontig_810	1
s_1_1_contig203528	s_1_1NewScaffoldedcontig_810	8519
s_1_1_contig141559	s_1_1NewScaffoldedcontig_811	92
s_1_1_contig161600	s_1_1NewScaffoldedcontig_812	1
s_1_1_contig224577	s_1_1NewScaffoldedcontig_812	3813
s_1_1_contig124312	s_1_1NewScaffoldedcontig_813	1
s_1_1_contig244996	s_1_1NewScaffoldedcontig_815	8497
s_1_1_contig115249	s_1_1NewScaffoldedcontig_816	1
s_1_1_contig50369	s_1_1NewScaffoldedcontig_817	2474
s_1_1_contig226466	s_1_1NewScaffoldedcontig_818	36699
s_1_1_contig82456	s_1_1NewScaffoldedcontig_819	38
s_1_1_contig21732	s_1_1NewScaffoldedcontig_820	74
s_1_1_contig28908	s_1_1NewScaffoldedcontig_820	28054
s_1_1_contig84594	s_1_1NewScaffoldedcontig_820	47946
s_1_1_contig112692	s_1_1NewScaffoldedcontig_820	80193
s_1_1_contig82883	s_1_1NewScaffoldedcontig_820	146344
s_1_1_contig223812	s_1_1NewScaffoldedcontig_821	1
s_1_1_contig270756	s_1_1NewScaffoldedcontig_823	1
s_1_1_contig260775	s_1_1NewScaffoldedcontig_823	1041
s_1_1_contig222573	s_1_1NewScaffoldedcontig_823	3114
s_1_1_contig172966	s_1_1NewScaffoldedcontig_823	4547
s_1_1_contig234258	s_1_1NewScaffoldedcontig_823	11825
s_1_1_contig230395	s_1_1NewScaffoldedcontig_823	16454
s_1_1_contig6283	s_1_1NewScaffoldedcontig_826	1
s_1_1_contig208539	s_1_1NewScaffoldedcontig_826	1519
s_1_1_contig147531	s_1_1NewScaffoldedcontig_826	2648
s_1_1_contig190148	s_1_1NewScaffoldedcontig_826	4348
s_1_1_contig86703	s_1_1NewScaffoldedcontig_826	8379
s_1_1_contig219184	s_1_1NewScaffoldedcontig_827	3
s_1_1_contig141423	s_1_1NewScaffoldedcontig_827	5766
s_1_1_contig260570	s_1_1NewScaffoldedcontig_828	19
s_1_1_contig11617	s_1_1NewScaffoldedcontig_829	26739
s_1_1_contig141145	s_1_1NewScaffoldedcontig_830	1
s_1_1_contig201683	s_1_1NewScaffoldedcontig_831	20
s_1_1_contig133966	s_1_1NewScaffoldedcontig_831	21897
s_1_1_contig137472	s_1_1NewScaffoldedcontig_831	24826
s_1_1_contig65091	s_1_1NewScaffoldedcontig_831	28367
s_1_1_contig221369	s_1_1NewScaffoldedcontig_832	23
s_1_1_contig95355	s_1_1NewScaffoldedcontig_832	4471
s_1_1_contig6347	s_1_1NewScaffoldedcontig_832	10777
s_1_1_contig164252	s_1_1NewScaffoldedcontig_832	15455
s_1_1_contig228653	s_1_1NewScaffoldedcontig_832	23383
s_1_1_contig133749	s_1_1NewScaffoldedcontig_832	25977
s_1_1_contig211002	s_1_1NewScaffoldedcontig_834	823
s_1_1_contig189111	s_1_1NewScaffoldedcontig_834	965
s_1_1_contig259056	s_1_1NewScaffoldedcontig_834	1034
s_1_1_contig206827	s_1_1NewScaffoldedcontig_834	1034
s_1_1_contig10116	s_1_1NewScaffoldedcontig_836	34
s_1_1_contig230680	s_1_1NewScaffoldedcontig_836	1525
s_1_1_contig230437	s_1_1NewScaffoldedcontig_836	17804
s_1_1_contig41194	s_1_1NewScaffoldedcontig_836	19544
s_1_1_contig126392	s_1_1NewScaffoldedcontig_837	1
s_1_1_contig123260	s_1_1NewScaffoldedcontig_837	2345
s_1_1_contig179948	s_1_1NewScaffoldedcontig_839	1
s_1_1_contig226278	s_1_1NewScaffoldedcontig_839	5015
s_1_1_contig127485	s_1_1NewScaffoldedcontig_840	4268
s_1_1_contig130052	s_1_1NewScaffoldedcontig_840	9321
s_1_1_contig232863	s_1_1NewScaffoldedcontig_840	12556
s_1_1_contig178525	s_1_1NewScaffoldedcontig_840	14079
s_1_1_contig37761	s_1_1NewScaffoldedcontig_840	15184
s_1_1_contig143855	s_1_1NewScaffoldedcontig_840	16380
s_1_1_contig141014	s_1_1NewScaffoldedcontig_840	18632
s_1_1_contig14993	s_1_1NewScaffoldedcontig_840	21645
s_1_1_contig172839	s_1_1NewScaffoldedcontig_840	23491
s_1_1_contig83101	s_1_1NewScaffoldedcontig_840	24041
s_1_1_contig107166	s_1_1NewScaffoldedcontig_840	29132
s_1_1_contig228317	s_1_1NewScaffoldedcontig_840	35380
s_1_1_contig260893	s_1_1NewScaffoldedcontig_840	40336
s_1_1_contig195194	s_1_1NewScaffoldedcontig_840	45486
s_1_1_contig139084	s_1_1NewScaffoldedcontig_840	51124
s_1_1_contig216034	s_1_1NewScaffoldedcontig_840	52988
s_1_1_contig211973	s_1_1NewScaffoldedcontig_841	1553
s_1_1_contig253501	s_1_1NewScaffoldedcontig_841	1553
s_1_1_contig126997	s_1_1NewScaffoldedcontig_841	3140
s_1_1_contig134991	s_1_1NewScaffoldedcontig_841	5744
s_1_1_contig144325	s_1_1NewScaffoldedcontig_841	11620
s_1_1_contig130186	s_1_1NewScaffoldedcontig_843	12135
s_1_1_contig3263	s_1_1NewScaffoldedcontig_843	14425
s_1_1_contig6129	s_1_1NewScaffoldedcontig_843	17931
s_1_1_contig48500	s_1_1NewScaffoldedcontig_844	12119
s_1_1_contig93712	s_1_1NewScaffoldedcontig_846	3819
s_1_1_contig4981	s_1_1NewScaffoldedcontig_846	12215
s_1_1_contig138340	s_1_1NewScaffoldedcontig_847	47090
s_1_1_contig276527	s_1_1NewScaffoldedcontig_848	1136
s_1_1_contig252649	s_1_1NewScaffoldedcontig_849	87
s_1_1_contig123460	s_1_1NewScaffoldedcontig_850	1
s_1_1_contig44996	s_1_1NewScaffoldedcontig_850	5017
s_1_1_contig184420	s_1_1NewScaffoldedcontig_850	6345
s_1_1_contig30101	s_1_1NewScaffoldedcontig_850	7366
s_1_1_contig250589	s_1_1NewScaffoldedcontig_850	8156
s_1_1_contig260245	s_1_1NewScaffoldedcontig_850	8959
s_1_1_contig192108	s_1_1NewScaffoldedcontig_850	12030
s_1_1_contig47651	s_1_1NewScaffoldedcontig_850	12905
s_1_1_contig204740	s_1_1NewScaffoldedcontig_853	1
s_1_1_contig203422	s_1_1NewScaffoldedcontig_853	3974
s_1_1_contig269429	s_1_1NewScaffoldedcontig_853	7921
s_1_1_contig122995	s_1_1NewScaffoldedcontig_853	9794
s_1_1_contig138058	s_1_1NewScaffoldedcontig_853	12772
s_1_1_contig191527	s_1_1NewScaffoldedcontig_853	17927
s_1_1_contig174365	s_1_1NewScaffoldedcontig_853	19134
s_1_1_contig32642	s_1_1NewScaffoldedcontig_853	20271
s_1_1_contig47157	s_1_1NewScaffoldedcontig_853	21005
s_1_1_contig123523	s_1_1NewScaffoldedcontig_853	21454
s_1_1_contig200550	s_1_1NewScaffoldedcontig_853	26471
s_1_1_contig251626	s_1_1NewScaffoldedcontig_853	31903
s_1_1_contig90355	s_1_1NewScaffoldedcontig_853	33372
s_1_1_contig862	s_1_1NewScaffoldedcontig_853	39080
s_1_1_contig181597	s_1_1NewScaffoldedcontig_853	40198
s_1_1_contig219692	s_1_1NewScaffoldedcontig_854	30
s_1_1_contig146728	s_1_1NewScaffoldedcontig_854	7491
s_1_1_contig214341	s_1_1NewScaffoldedcontig_854	10001
s_1_1_contig102791	s_1_1NewScaffoldedcontig_854	11501
s_1_1_contig104088	s_1_1NewScaffoldedcontig_854	31352
s_1_1_contig47990	s_1_1NewScaffoldedcontig_854	39041
s_1_1_contig37029	s_1_1NewScaffoldedcontig_854	39626
s_1_1_contig152315	s_1_1NewScaffoldedcontig_854	41034
s_1_1_contig271838	s_1_1NewScaffoldedcontig_854	46634
s_1_1_contig63935	s_1_1NewScaffoldedcontig_855	1
s_1_1_contig96262	s_1_1NewScaffoldedcontig_855	16881
s_1_1_contig264245	s_1_1NewScaffoldedcontig_856	13197
s_1_1_contig264292	s_1_1NewScaffoldedcontig_856	15553
s_1_1_contig211190	s_1_1NewScaffoldedcontig_858	1
s_1_1_contig8485	s_1_1NewScaffoldedcontig_858	1748
s_1_1_contig228720	s_1_1NewScaffoldedcontig_858	4397
s_1_1_contig230628	s_1_1NewScaffoldedcontig_858	7196
s_1_1_contig78355	s_1_1NewScaffoldedcontig_858	23847
s_1_1_contig176639	s_1_1NewScaffoldedcontig_858	56692
s_1_1_contig255277	s_1_1NewScaffoldedcontig_859	772
s_1_1_contig214288	s_1_1NewScaffoldedcontig_859	1406
s_1_1_contig214879	s_1_1NewScaffoldedcontig_859	5252
s_1_1_contig258780	s_1_1NewScaffoldedcontig_860	897
s_1_1_contig77474	s_1_1NewScaffoldedcontig_861	37
s_1_1_contig126867	s_1_1NewScaffoldedcontig_861	9405
s_1_1_contig87034	s_1_1NewScaffoldedcontig_861	12597
s_1_1_contig166091	s_1_1NewScaffoldedcontig_864	1
s_1_1_contig113568	s_1_1NewScaffoldedcontig_865	1
s_1_1_contig9683	s_1_1NewScaffoldedcontig_865	9946
s_1_1_contig149416	s_1_1NewScaffoldedcontig_865	11519
s_1_1_contig191897	s_1_1NewScaffoldedcontig_865	14594
s_1_1_contig262926	s_1_1NewScaffoldedcontig_865	15820
s_1_1_contig128278	s_1_1NewScaffoldedcontig_866	26838
s_1_1_contig70241	s_1_1NewScaffoldedcontig_867	2705
s_1_1_contig25993	s_1_1NewScaffoldedcontig_867	7175
s_1_1_contig265814	s_1_1NewScaffoldedcontig_867	8611
s_1_1_contig232782	s_1_1NewScaffoldedcontig_867	11461
s_1_1_contig218385	s_1_1NewScaffoldedcontig_867	14609
s_1_1_contig222208	s_1_1NewScaffoldedcontig_867	18209
s_1_1_contig201189	s_1_1NewScaffoldedcontig_867	22160
s_1_1_contig156180	s_1_1NewScaffoldedcontig_867	24510
s_1_1_contig163389	s_1_1NewScaffoldedcontig_867	36913
s_1_1_contig9389	s_1_1NewScaffoldedcontig_867	52683
s_1_1_contig170739	s_1_1NewScaffoldedcontig_867	55003
s_1_1_contig49719	s_1_1NewScaffoldedcontig_867	57676
s_1_1_contig226777	s_1_1NewScaffoldedcontig_867	64278
s_1_1_contig203886	s_1_1NewScaffoldedcontig_867	66033
s_1_1_contig65041	s_1_1NewScaffoldedcontig_867	66759
s_1_1_contig177636	s_1_1NewScaffoldedcontig_867	70874
s_1_1_contig122996	s_1_1NewScaffoldedcontig_867	73905
s_1_1_contig180284	s_1_1NewScaffoldedcontig_867	80350
s_1_1_contig263201	s_1_1NewScaffoldedcontig_868	94
s_1_1_contig219109	s_1_1NewScaffoldedcontig_868	6553
s_1_1_contig85724	s_1_1NewScaffoldedcontig_868	10275
s_1_1_contig54843	s_1_1NewScaffoldedcontig_868	47202
s_1_1_contig174181	s_1_1NewScaffoldedcontig_869	12
s_1_1_contig109798	s_1_1NewScaffoldedcontig_869	41726
s_1_1_contig103415	s_1_1NewScaffoldedcontig_869	44576
s_1_1_contig164205	s_1_1NewScaffoldedcontig_869	50231
s_1_1_contig179918	s_1_1NewScaffoldedcontig_869	53600
s_1_1_contig115410	s_1_1NewScaffoldedcontig_869	85441
s_1_1_contig4289	s_1_1NewScaffoldedcontig_869	88727
s_1_1_contig219381	s_1_1NewScaffoldedcontig_871	1
s_1_1_contig100276	s_1_1NewScaffoldedcontig_871	3513
s_1_1_contig103581	s_1_1NewScaffoldedcontig_872	1
s_1_1_contig263013	s_1_1NewScaffoldedcontig_872	4169
s_1_1_contig147030	s_1_1NewScaffoldedcontig_873	1
s_1_1_contig200426	s_1_1NewScaffoldedcontig_876	12097
s_1_1_contig151981	s_1_1NewScaffoldedcontig_876	14821
s_1_1_contig262478	s_1_1NewScaffoldedcontig_876	19697
s_1_1_contig190301	s_1_1NewScaffoldedcontig_877	1
s_1_1_contig99526	s_1_1NewScaffoldedcontig_878	1
s_1_1_contig115977	s_1_1NewScaffoldedcontig_879	4
s_1_1_contig202995	s_1_1NewScaffoldedcontig_879	2964
s_1_1_contig10792	s_1_1NewScaffoldedcontig_879	7829
s_1_1_contig133235	s_1_1NewScaffoldedcontig_879	9671
s_1_1_contig92014	s_1_1NewScaffoldedcontig_880	25
s_1_1_contig14138	s_1_1NewScaffoldedcontig_880	7835
s_1_1_contig36956	s_1_1NewScaffoldedcontig_880	12629
s_1_1_contig221719	s_1_1NewScaffoldedcontig_880	18404
s_1_1_contig88304	s_1_1NewScaffoldedcontig_880	26728
s_1_1_contig164137	s_1_1NewScaffoldedcontig_880	31779
s_1_1_contig141539	s_1_1NewScaffoldedcontig_880	33642
s_1_1_contig101955	s_1_1NewScaffoldedcontig_880	37624
s_1_1_contig111501	s_1_1NewScaffoldedcontig_880	43179
s_1_1_contig206298	s_1_1NewScaffoldedcontig_880	58812
s_1_1_contig226679	s_1_1NewScaffoldedcontig_880	59327
s_1_1_contig83674	s_1_1NewScaffoldedcontig_882	5524
s_1_1_contig111095	s_1_1NewScaffoldedcontig_882	12942
s_1_1_contig137152	s_1_1NewScaffoldedcontig_882	15435
s_1_1_contig70383	s_1_1NewScaffoldedcontig_882	18161
s_1_1_contig16930	s_1_1NewScaffoldedcontig_882	24118
s_1_1_contig177225	s_1_1NewScaffoldedcontig_882	51280
s_1_1_contig36067	s_1_1NewScaffoldedcontig_884	1
s_1_1_contig72988	s_1_1NewScaffoldedcontig_890	32
s_1_1_contig220921	s_1_1NewScaffoldedcontig_890	20748
s_1_1_contig75170	s_1_1NewScaffoldedcontig_892	1
s_1_1_contig34982	s_1_1NewScaffoldedcontig_892	7769
s_1_1_contig147797	s_1_1NewScaffoldedcontig_892	8471
s_1_1_contig238970	s_1_1NewScaffoldedcontig_892	9901
s_1_1_contig221380	s_1_1NewScaffoldedcontig_893	398
s_1_1_contig96308	s_1_1NewScaffoldedcontig_893	2490
s_1_1_contig186724	s_1_1NewScaffoldedcontig_893	9006
s_1_1_contig204010	s_1_1NewScaffoldedcontig_894	15
s_1_1_contig164402	s_1_1NewScaffoldedcontig_894	2216
s_1_1_contig276825	s_1_1NewScaffoldedcontig_898	1
s_1_1_contig208864	s_1_1NewScaffoldedcontig_901	12450
s_1_1_contig221629	s_1_1NewScaffoldedcontig_901	13219
s_1_1_contig260779	s_1_1NewScaffoldedcontig_901	15455
s_1_1_contig114677	s_1_1NewScaffoldedcontig_901	20488
s_1_1_contig115131	s_1_1NewScaffoldedcontig_905	1
s_1_1_contig149212	s_1_1NewScaffoldedcontig_905	9075
s_1_1_contig99056	s_1_1NewScaffoldedcontig_905	11007
s_1_1_contig115767	s_1_1NewScaffoldedcontig_906	1
s_1_1_contig115364	s_1_1NewScaffoldedcontig_907	1
s_1_1_contig10534	s_1_1NewScaffoldedcontig_907	1763
s_1_1_contig266470	s_1_1NewScaffoldedcontig_908	1
s_1_1_contig199124	s_1_1NewScaffoldedcontig_908	1229
s_1_1_contig69734	s_1_1NewScaffoldedcontig_908	2177
s_1_1_contig250111	s_1_1NewScaffoldedcontig_909	1
s_1_1_contig143550	s_1_1NewScaffoldedcontig_909	3297
s_1_1_contig221147	s_1_1NewScaffoldedcontig_909	4460
s_1_1_contig214250	s_1_1NewScaffoldedcontig_909	6792
s_1_1_contig143279	s_1_1NewScaffoldedcontig_909	8672
s_1_1_contig90350	s_1_1NewScaffoldedcontig_910	1
s_1_1_contig273267	s_1_1NewScaffoldedcontig_910	7080
s_1_1_contig64546	s_1_1NewScaffoldedcontig_911	2450
s_1_1_contig84540	s_1_1NewScaffoldedcontig_911	7609
s_1_1_contig28636	s_1_1NewScaffoldedcontig_911	15378
s_1_1_contig100447	s_1_1NewScaffoldedcontig_911	16349
s_1_1_contig64578	s_1_1NewScaffoldedcontig_911	23333
s_1_1_contig83140	s_1_1NewScaffoldedcontig_911	30968
s_1_1_contig183322	s_1_1NewScaffoldedcontig_911	34780
s_1_1_contig279749	s_1_1NewScaffoldedcontig_911	44911
s_1_1_contig151141	s_1_1NewScaffoldedcontig_911	47058
s_1_1_contig126938	s_1_1NewScaffoldedcontig_911	50441
s_1_1_contig50352	s_1_1NewScaffoldedcontig_911	55139
s_1_1_contig14958	s_1_1NewScaffoldedcontig_913	11087
s_1_1_contig188426	s_1_1NewScaffoldedcontig_913	15214
s_1_1_contig156726	s_1_1NewScaffoldedcontig_913	17177
s_1_1_contig180827	s_1_1NewScaffoldedcontig_913	21123
s_1_1_contig193045	s_1_1NewScaffoldedcontig_913	23463
s_1_1_contig269965	s_1_1NewScaffoldedcontig_913	36295
s_1_1_contig194913	s_1_1NewScaffoldedcontig_913	39684
s_1_1_contig36240	s_1_1NewScaffoldedcontig_914	27
s_1_1_contig4995	s_1_1NewScaffoldedcontig_914	29295
s_1_1_contig105762	s_1_1NewScaffoldedcontig_914	30952
s_1_1_contig207261	s_1_1NewScaffoldedcontig_915	157
s_1_1_contig228621	s_1_1NewScaffoldedcontig_917	1
s_1_1_contig209326	s_1_1NewScaffoldedcontig_917	3202
s_1_1_contig259046	s_1_1NewScaffoldedcontig_917	5843
s_1_1_contig229560	s_1_1NewScaffoldedcontig_917	7133
s_1_1_contig222207	s_1_1NewScaffoldedcontig_917	11430
s_1_1_contig277356	s_1_1NewScaffoldedcontig_918	1
s_1_1_contig230543	s_1_1NewScaffoldedcontig_919	15773
s_1_1_contig134702	s_1_1NewScaffoldedcontig_920	589
s_1_1_contig13723	s_1_1NewScaffoldedcontig_920	22048
s_1_1_contig165745	s_1_1NewScaffoldedcontig_920	33024
s_1_1_contig106526	s_1_1NewScaffoldedcontig_921	109
s_1_1_contig165712	s_1_1NewScaffoldedcontig_921	3444
s_1_1_contig3222	s_1_1NewScaffoldedcontig_922	1
s_1_1_contig203421	s_1_1NewScaffoldedcontig_922	55265
s_1_1_contig129354	s_1_1NewScaffoldedcontig_922	83409
s_1_1_contig130501	s_1_1NewScaffoldedcontig_924	1
s_1_1_contig239649	s_1_1NewScaffoldedcontig_926	1
s_1_1_contig115177	s_1_1NewScaffoldedcontig_928	1
s_1_1_contig210365	s_1_1NewScaffoldedcontig_929	497
s_1_1_contig243331	s_1_1NewScaffoldedcontig_929	1613
s_1_1_contig88083	s_1_1NewScaffoldedcontig_931	1
s_1_1_contig226275	s_1_1NewScaffoldedcontig_933	1
s_1_1_contig3933	s_1_1NewScaffoldedcontig_933	5915
s_1_1_contig195436	s_1_1NewScaffoldedcontig_936	65
s_1_1_contig166275	s_1_1NewScaffoldedcontig_936	3950
s_1_1_contig199328	s_1_1NewScaffoldedcontig_936	8557
s_1_1_contig86230	s_1_1NewScaffoldedcontig_936	9974
s_1_1_contig14074	s_1_1NewScaffoldedcontig_936	18580
s_1_1_contig81036	s_1_1NewScaffoldedcontig_937	1
s_1_1_contig270236	s_1_1NewScaffoldedcontig_937	4413
s_1_1_contig75913	s_1_1NewScaffoldedcontig_937	19854
s_1_1_contig36757	s_1_1NewScaffoldedcontig_937	30012
s_1_1_contig146187	s_1_1NewScaffoldedcontig_937	31014
s_1_1_contig168824	s_1_1NewScaffoldedcontig_940	7746
s_1_1_contig218195	s_1_1NewScaffoldedcontig_941	2637
s_1_1_contig99434	s_1_1NewScaffoldedcontig_944	3082
s_1_1_contig62404	s_1_1NewScaffoldedcontig_944	7811
s_1_1_contig117884	s_1_1NewScaffoldedcontig_944	11476
s_1_1_contig1192	s_1_1NewScaffoldedcontig_944	17944
s_1_1_contig123773	s_1_1NewScaffoldedcontig_944	18601
s_1_1_contig193839	s_1_1NewScaffoldedcontig_944	26294
s_1_1_contig120978	s_1_1NewScaffoldedcontig_945	42
s_1_1_contig225260	s_1_1NewScaffoldedcontig_945	4195
s_1_1_contig72276	s_1_1NewScaffoldedcontig_945	7694
s_1_1_contig149800	s_1_1NewScaffoldedcontig_946	8566
s_1_1_contig12849	s_1_1NewScaffoldedcontig_947	1
s_1_1_contig133331	s_1_1NewScaffoldedcontig_947	3238
s_1_1_contig3291	s_1_1NewScaffoldedcontig_947	46264
s_1_1_contig162074	s_1_1NewScaffoldedcontig_948	1
s_1_1_contig10840	s_1_1NewScaffoldedcontig_948	4402
s_1_1_contig127506	s_1_1NewScaffoldedcontig_949	1
s_1_1_contig81285	s_1_1NewScaffoldedcontig_950	1
s_1_1_contig89746	s_1_1NewScaffoldedcontig_950	4592
s_1_1_contig277466	s_1_1NewScaffoldedcontig_951	1
s_1_1_contig237501	s_1_1NewScaffoldedcontig_951	40942
s_1_1_contig139686	s_1_1NewScaffoldedcontig_953	79
s_1_1_contig63215	s_1_1NewScaffoldedcontig_954	1
s_1_1_contig23512	s_1_1NewScaffoldedcontig_955	14921
s_1_1_contig3274	s_1_1NewScaffoldedcontig_956	24163
s_1_1_contig162571	s_1_1NewScaffoldedcontig_956	26017
s_1_1_contig121973	s_1_1NewScaffoldedcontig_957	1
s_1_1_contig269558	s_1_1NewScaffoldedcontig_958	1
s_1_1_contig218252	s_1_1NewScaffoldedcontig_958	2590
s_1_1_contig27576	s_1_1NewScaffoldedcontig_960	1444
s_1_1_contig177383	s_1_1NewScaffoldedcontig_960	2147
s_1_1_contig20294	s_1_1NewScaffoldedcontig_960	12274
s_1_1_contig282357	s_1_1NewScaffoldedcontig_960	15606
s_1_1_contig252969	s_1_1NewScaffoldedcontig_963	1151
s_1_1_contig255699	s_1_1NewScaffoldedcontig_963	1936
s_1_1_contig124462	s_1_1NewScaffoldedcontig_964	2452
s_1_1_contig145095	s_1_1NewScaffoldedcontig_964	15131
s_1_1_contig76481	s_1_1NewScaffoldedcontig_965	1
s_1_1_contig262252	s_1_1NewScaffoldedcontig_965	4745
s_1_1_contig81826	s_1_1NewScaffoldedcontig_966	21537
s_1_1_contig258042	s_1_1NewScaffoldedcontig_966	24216
s_1_1_contig97088	s_1_1NewScaffoldedcontig_967	1
s_1_1_contig13031	s_1_1NewScaffoldedcontig_969	3994
s_1_1_contig122340	s_1_1NewScaffoldedcontig_970	13677
s_1_1_contig145524	s_1_1NewScaffoldedcontig_971	868
[truncated: 206,000+ more rows]

## Sheet: TableS3-B
Table S3-B Large Gap	Read Mapping Step Two Results
SMACv1.0 de novo Contig	SMACv1.1 Scaffolded de novo Contig	Start Position in Scaffold
s_1_1_contig211216	s_1_1NewScaffoldedcontig_11	4759
s_1_1_contig18466	s_1_1NewScaffoldedcontig_12	3901
s_1_1_contig233669	s_1_1NewScaffoldedcontig_28	33623
s_1_1_contig252234	s_1_1NewScaffoldedcontig_36	14920
s_1_1_contig99991	s_1_1NewScaffoldedcontig_36	63243
s_1_1_contig228491	s_1_1NewScaffoldedcontig_37	27
s_1_1_contig257134	s_1_1NewScaffoldedcontig_39	1029
s_1_1_contig202500	s_1_1NewScaffoldedcontig_42	14371
s_1_1_contig195880	s_1_1NewScaffoldedcontig_45	1
s_1_1_contig13851	s_1_1NewScaffoldedcontig_47	3620
s_1_1_contig212061	s_1_1NewScaffoldedcontig_48	3563
s_1_1_contig281626	s_1_1NewScaffoldedcontig_48	3565
s_1_1_contig281017	s_1_1NewScaffoldedcontig_49	3055
s_1_1_contig276132	s_1_1NewScaffoldedcontig_50	1
s_1_1_contig280682	s_1_1NewScaffoldedcontig_51	32437
s_1_1_contig68970	s_1_1NewScaffoldedcontig_59	1
s_1_1_contig65349	s_1_1NewScaffoldedcontig_60	1500
s_1_1_contig257428	s_1_1NewScaffoldedcontig_61	2250
s_1_1_contig258267	s_1_1NewScaffoldedcontig_61	2296
s_1_1_contig259190	s_1_1NewScaffoldedcontig_69	4
s_1_1_contig154208	s_1_1NewScaffoldedcontig_89	7280
s_1_1_contig199365	s_1_1NewScaffoldedcontig_93	12015
s_1_1_contig132292	s_1_1NewScaffoldedcontig_101	1434
s_1_1_contig43607	s_1_1NewScaffoldedcontig_101	40227
s_1_1_contig250694	s_1_1NewScaffoldedcontig_111	5
s_1_1_contig279815	s_1_1NewScaffoldedcontig_121	2548
s_1_1_contig165942	s_1_1NewScaffoldedcontig_124	9382
s_1_1_contig2988	s_1_1NewScaffoldedcontig_140	22120
s_1_1_contig246348	s_1_1NewScaffoldedcontig_140	65824
s_1_1_contig185326	s_1_1NewScaffoldedcontig_140	65845
s_1_1_contig256375	s_1_1NewScaffoldedcontig_140	66033
s_1_1_contig196622	s_1_1NewScaffoldedcontig_146	1
s_1_1_contig185783	s_1_1NewScaffoldedcontig_148	6609
s_1_1_contig246225	s_1_1NewScaffoldedcontig_149	25043
s_1_1_contig153817	s_1_1NewScaffoldedcontig_165	20456
s_1_1_contig189991	s_1_1NewScaffoldedcontig_167	7447
s_1_1_contig190048	s_1_1NewScaffoldedcontig_171	15021
s_1_1_contig220999	s_1_1NewScaffoldedcontig_175	10626
s_1_1_contig145031	s_1_1NewScaffoldedcontig_184	1
s_1_1_contig194551	s_1_1NewScaffoldedcontig_191	10310
s_1_1_contig238881	s_1_1NewScaffoldedcontig_192	2587
s_1_1_contig206601	s_1_1NewScaffoldedcontig_198	10135
s_1_1_contig255278	s_1_1NewScaffoldedcontig_214	36
s_1_1_contig142623	s_1_1NewScaffoldedcontig_218	25798
s_1_1_contig144663	s_1_1NewScaffoldedcontig_225	19294
s_1_1_contig151957	s_1_1NewScaffoldedcontig_233	158
s_1_1_contig214768	s_1_1NewScaffoldedcontig_241	317
s_1_1_contig214188	s_1_1NewScaffoldedcontig_249	5114
s_1_1_contig206851	s_1_1NewScaffoldedcontig_253	4
s_1_1_contig52162	s_1_1NewScaffoldedcontig_253	237
s_1_1_contig91568	s_1_1NewScaffoldedcontig_259	1
s_1_1_contig182667	s_1_1NewScaffoldedcontig_265	17037
s_1_1_contig269465	s_1_1NewScaffoldedcontig_277	8047
s_1_1_contig211980	s_1_1NewScaffoldedcontig_289	2057
s_1_1_contig216053	s_1_1NewScaffoldedcontig_294	43916
s_1_1_contig227002	s_1_1NewScaffoldedcontig_301	1242
s_1_1_contig96251	s_1_1NewScaffoldedcontig_304	1
s_1_1_contig92125	s_1_1NewScaffoldedcontig_308	16936
s_1_1_contig96397	s_1_1NewScaffoldedcontig_310	12285
s_1_1_contig183690	s_1_1NewScaffoldedcontig_312	2396
s_1_1_contig172155	s_1_1NewScaffoldedcontig_337	22207
s_1_1_contig50128	s_1_1NewScaffoldedcontig_341	24107
s_1_1_contig38504	s_1_1NewScaffoldedcontig_343	35182
s_1_1_contig249877	s_1_1NewScaffoldedcontig_365	19564
s_1_1_contig255469	s_1_1NewScaffoldedcontig_375	62
s_1_1_contig189486	s_1_1NewScaffoldedcontig_382	20296
s_1_1_contig146233	s_1_1NewScaffoldedcontig_388	2444
s_1_1_contig227687	s_1_1NewScaffoldedcontig_394	38261
s_1_1_contig249155	s_1_1NewScaffoldedcontig_408	29579
s_1_1_contig227097	s_1_1NewScaffoldedcontig_410	102426
s_1_1_contig223506	s_1_1NewScaffoldedcontig_418	1764
s_1_1_contig34730	s_1_1NewScaffoldedcontig_418	2989
s_1_1_contig211384	s_1_1NewScaffoldedcontig_429	4352
s_1_1_contig189198	s_1_1NewScaffoldedcontig_429	4452
s_1_1_contig196494	s_1_1NewScaffoldedcontig_430	1
s_1_1_contig23728	s_1_1NewScaffoldedcontig_433	1
s_1_1_contig35380	s_1_1NewScaffoldedcontig_435	12210
s_1_1_contig225951	s_1_1NewScaffoldedcontig_452	1
s_1_1_contig135303	s_1_1NewScaffoldedcontig_462	1900
s_1_1_contig14771	s_1_1NewScaffoldedcontig_464	40676
s_1_1_contig12148	s_1_1NewScaffoldedcontig_487	29177
s_1_1_contig256884	s_1_1NewScaffoldedcontig_501	2309
s_1_1_contig164492	s_1_1NewScaffoldedcontig_502	426
s_1_1_contig176621	s_1_1NewScaffoldedcontig_513	1
s_1_1_contig236962	s_1_1NewScaffoldedcontig_514	14466
s_1_1_contig129789	s_1_1NewScaffoldedcontig_517	26745
s_1_1_contig280484	s_1_1NewScaffoldedcontig_518	352
s_1_1_contig134989	s_1_1NewScaffoldedcontig_522	12736
s_1_1_contig189293	s_1_1NewScaffoldedcontig_527	573
s_1_1_contig258359	s_1_1NewScaffoldedcontig_527	1790
s_1_1_contig256101	s_1_1NewScaffoldedcontig_527	1993
s_1_1_contig252792	s_1_1NewScaffoldedcontig_541	12258
s_1_1_contig227745	s_1_1NewScaffoldedcontig_544	1
s_1_1_contig253305	s_1_1NewScaffoldedcontig_551	293
s_1_1_contig213323	s_1_1NewScaffoldedcontig_554	24834
s_1_1_contig211169	s_1_1NewScaffoldedcontig_557	1058
s_1_1_contig253004	s_1_1NewScaffoldedcontig_567	2719
s_1_1_contig197875	s_1_1NewScaffoldedcontig_569	1
s_1_1_contig232563	s_1_1NewScaffoldedcontig_574	1
s_1_1_contig235117	s_1_1NewScaffoldedcontig_579	33055
s_1_1_contig243228	s_1_1NewScaffoldedcontig_580	5186
s_1_1_contig59820	s_1_1NewScaffoldedcontig_591	8
s_1_1_contig146831	s_1_1NewScaffoldedcontig_591	661
s_1_1_contig278422	s_1_1NewScaffoldedcontig_592	842
s_1_1_contig124129	s_1_1NewScaffoldedcontig_593	347
s_1_1_contig257012	s_1_1NewScaffoldedcontig_596	5244
s_1_1_contig208148	s_1_1NewScaffoldedcontig_600	21169
s_1_1_contig87204	s_1_1NewScaffoldedcontig_605	3477
s_1_1_contig207704	s_1_1NewScaffoldedcontig_608	59
s_1_1_contig249896	s_1_1NewScaffoldedcontig_612	1
s_1_1_contig124832	s_1_1NewScaffoldedcontig_615	155
s_1_1_contig120668	s_1_1NewScaffoldedcontig_619	15016
s_1_1_contig174309	s_1_1NewScaffoldedcontig_621	28294
s_1_1_contig255578	s_1_1NewScaffoldedcontig_621	43741
s_1_1_contig245032	s_1_1NewScaffoldedcontig_621	43787
s_1_1_contig256472	s_1_1NewScaffoldedcontig_623	190
s_1_1_contig87092	s_1_1NewScaffoldedcontig_643	23
s_1_1_contig208186	s_1_1NewScaffoldedcontig_644	662
s_1_1_contig208643	s_1_1NewScaffoldedcontig_653	10465
s_1_1_contig214665	s_1_1NewScaffoldedcontig_673	4559
s_1_1_contig61492	s_1_1NewScaffoldedcontig_684	1
s_1_1_contig9764	s_1_1NewScaffoldedcontig_691	8045
s_1_1_contig169536	s_1_1NewScaffoldedcontig_695	225
s_1_1_contig242755	s_1_1NewScaffoldedcontig_705	18602
s_1_1_contig181695	s_1_1NewScaffoldedcontig_708	1
s_1_1_contig225615	s_1_1NewScaffoldedcontig_709	51441
s_1_1_contig53397	s_1_1NewScaffoldedcontig_710	1
s_1_1_contig184456	s_1_1NewScaffoldedcontig_711	1
s_1_1_contig50007	s_1_1NewScaffoldedcontig_719	46
s_1_1_contig118541	s_1_1NewScaffoldedcontig_720	34663
s_1_1_contig59536	s_1_1NewScaffoldedcontig_720	51447
s_1_1_contig170478	s_1_1NewScaffoldedcontig_722	1
s_1_1_contig207362	s_1_1NewScaffoldedcontig_733	275
s_1_1_contig170992	s_1_1NewScaffoldedcontig_734	12366
s_1_1_contig189804	s_1_1NewScaffoldedcontig_754	5447
s_1_1_contig245717	s_1_1NewScaffoldedcontig_754	7220
s_1_1_contig150714	s_1_1NewScaffoldedcontig_759	6092
s_1_1_contig137925	s_1_1NewScaffoldedcontig_770	4
s_1_1_contig40580	s_1_1NewScaffoldedcontig_780	15808
s_1_1_contig166446	s_1_1NewScaffoldedcontig_788	132
s_1_1_contig176233	s_1_1NewScaffoldedcontig_788	28608
s_1_1_contig19740	s_1_1NewScaffoldedcontig_797	10852
s_1_1_contig185527	s_1_1NewScaffoldedcontig_816	6760
s_1_1_contig208175	s_1_1NewScaffoldedcontig_818	33256
s_1_1_contig254362	s_1_1NewScaffoldedcontig_834	66
s_1_1_contig84418	s_1_1NewScaffoldedcontig_854	2871
s_1_1_contig236431	s_1_1NewScaffoldedcontig_854	45216
s_1_1_contig191542	s_1_1NewScaffoldedcontig_854	49864
s_1_1_contig133746	s_1_1NewScaffoldedcontig_865	3308
s_1_1_contig244736	s_1_1NewScaffoldedcontig_867	40535
s_1_1_contig145016	s_1_1NewScaffoldedcontig_875	1
s_1_1_contig28433	s_1_1NewScaffoldedcontig_879	17276
s_1_1_contig132902	s_1_1NewScaffoldedcontig_880	13553
s_1_1_contig204575	s_1_1NewScaffoldedcontig_886	1
s_1_1_contig212887	s_1_1NewScaffoldedcontig_915	1
s_1_1_contig147259	s_1_1NewScaffoldedcontig_915	2037
s_1_1_contig213586	s_1_1NewScaffoldedcontig_915	2256
s_1_1_contig254448	s_1_1NewScaffoldedcontig_923	84
s_1_1_contig221113	s_1_1NewScaffoldedcontig_941	63
s_1_1_contig170327	s_1_1NewScaffoldedcontig_944	1
s_1_1_contig207566	s_1_1NewScaffoldedcontig_956	18750
s_1_1_contig262236	s_1_1NewScaffoldedcontig_960	1
s_1_1_contig200685	s_1_1NewScaffoldedcontig_961	3431
s_1_1_contig254397	s_1_1NewScaffoldedcontig_963	723
s_1_1_contig190504	s_1_1NewScaffoldedcontig_968	1
s_1_1_contig185079	s_1_1NewScaffoldedcontig_971	6561
s_1_1_contig207902	s_1_1NewScaffoldedcontig_971	6561
s_1_1_contig204405	s_1_1NewScaffoldedcontig_972	16085
s_1_1_contig224958	s_1_1NewScaffoldedcontig_980	1
s_1_1_contig65435	s_1_1NewScaffoldedcontig_985	16260
s_1_1_contig232021	s_1_1NewScaffoldedcontig_998	16297
s_1_1_contig110094	s_1_1NewScaffoldedcontig_1006	6556
s_1_1_contig26439	s_1_1NewScaffoldedcontig_1006	10773
s_1_1_contig264937	s_1_1NewScaffoldedcontig_1016	13181
s_1_1_contig282839	s_1_1NewScaffoldedcontig_1017	17242
s_1_1_contig187372	s_1_1NewScaffoldedcontig_1022	9347
s_1_1_contig194072	s_1_1NewScaffoldedcontig_1024	27189
s_1_1_contig237054	s_1_1NewScaffoldedcontig_1024	36807
s_1_1_contig250407	s_1_1NewScaffoldedcontig_1026	4885
s_1_1_contig51921	s_1_1NewScaffoldedcontig_1030	19339
s_1_1_contig253357	s_1_1NewScaffoldedcontig_1031	404
s_1_1_contig257673	s_1_1NewScaffoldedcontig_1031	428
s_1_1_contig35590	s_1_1NewScaffoldedcontig_1040	19
s_1_1_contig143423	s_1_1NewScaffoldedcontig_1050	3933
s_1_1_contig121641	s_1_1NewScaffoldedcontig_1051	15693
s_1_1_contig208200	s_1_1NewScaffoldedcontig_1079	531
s_1_1_contig242828	s_1_1NewScaffoldedcontig_1091	18368
s_1_1_contig281822	s_1_1NewScaffoldedcontig_1099	1483
s_1_1_contig188907	s_1_1NewScaffoldedcontig_1100	13740
s_1_1_contig140472	s_1_1NewScaffoldedcontig_1110	24100
s_1_1_contig85629	s_1_1NewScaffoldedcontig_1110	28427
s_1_1_contig273090	s_1_1NewScaffoldedcontig_1110	36060
s_1_1_contig200089	s_1_1NewScaffoldedcontig_1110	36506
s_1_1_contig186651	s_1_1NewScaffoldedcontig_1111	23415
s_1_1_contig19245	s_1_1NewScaffoldedcontig_1114	222
s_1_1_contig239550	s_1_1NewScaffoldedcontig_1128	13496
s_1_1_contig105239	s_1_1NewScaffoldedcontig_1130	798
s_1_1_contig238867	s_1_1NewScaffoldedcontig_1133	4354
s_1_1_contig103574	s_1_1NewScaffoldedcontig_1139	1
s_1_1_contig131100	s_1_1NewScaffoldedcontig_1145	1
s_1_1_contig217817	s_1_1NewScaffoldedcontig_1145	3764
s_1_1_contig145800	s_1_1NewScaffoldedcontig_1148	1881
s_1_1_contig229809	s_1_1NewScaffoldedcontig_1150	12747
s_1_1_contig114227	s_1_1NewScaffoldedcontig_1153	4812
s_1_1_contig133826	s_1_1NewScaffoldedcontig_1154	42219
s_1_1_contig128588	s_1_1NewScaffoldedcontig_1156	17436
s_1_1_contig261835	s_1_1NewScaffoldedcontig_1164	13234
s_1_1_contig138681	s_1_1NewScaffoldedcontig_1170	9168
s_1_1_contig124019	s_1_1NewScaffoldedcontig_1176	1
s_1_1_contig131532	s_1_1NewScaffoldedcontig_1180	27305
s_1_1_contig211319	s_1_1NewScaffoldedcontig_1181	1
s_1_1_contig221885	s_1_1NewScaffoldedcontig_1187	31672
s_1_1_contig68887	s_1_1NewScaffoldedcontig_1188	1
s_1_1_contig145784	s_1_1NewScaffoldedcontig_1188	1982
s_1_1_contig228190	s_1_1NewScaffoldedcontig_1205	1
s_1_1_contig76555	s_1_1NewScaffoldedcontig_1206	70586
s_1_1_contig42461	s_1_1NewScaffoldedcontig_1207	21971
s_1_1_contig253728	s_1_1NewScaffoldedcontig_1217	389
s_1_1_contig251977	s_1_1NewScaffoldedcontig_1218	1
s_1_1_contig10057	s_1_1NewScaffoldedcontig_1222	11600
s_1_1_contig234879	s_1_1NewScaffoldedcontig_1231	1
s_1_1_contig228497	s_1_1NewScaffoldedcontig_1235	12996
s_1_1_contig193551	s_1_1NewScaffoldedcontig_1244	12839
s_1_1_contig254770	s_1_1NewScaffoldedcontig_1249	634
s_1_1_contig37736	s_1_1NewScaffoldedcontig_1252	1
s_1_1_contig141193	s_1_1NewScaffoldedcontig_1253	53
s_1_1_contig146707	s_1_1NewScaffoldedcontig_1269	1
s_1_1_contig239534	s_1_1NewScaffoldedcontig_1274	1
s_1_1_contig248859	s_1_1NewScaffoldedcontig_1276	1
s_1_1_contig255493	s_1_1NewScaffoldedcontig_1278	69634
s_1_1_contig188349	s_1_1NewScaffoldedcontig_1279	15404
s_1_1_contig154435	s_1_1NewScaffoldedcontig_1288	1
s_1_1_contig35801	s_1_1NewScaffoldedcontig_1292	9519
s_1_1_contig187597	s_1_1NewScaffoldedcontig_1294	14090
s_1_1_contig277491	s_1_1NewScaffoldedcontig_1302	17663
s_1_1_contig61353	s_1_1NewScaffoldedcontig_1307	1
s_1_1_contig139195	s_1_1NewScaffoldedcontig_1307	11909
s_1_1_contig213592	s_1_1NewScaffoldedcontig_1312	1934
s_1_1_contig208478	s_1_1NewScaffoldedcontig_1316	110
s_1_1_contig184738	s_1_1NewScaffoldedcontig_1320	1
s_1_1_contig127474	s_1_1NewScaffoldedcontig_1324	20792
s_1_1_contig242782	s_1_1NewScaffoldedcontig_1331	1
s_1_1_contig231842	s_1_1NewScaffoldedcontig_1346	2889
s_1_1_contig195509	s_1_1NewScaffoldedcontig_1350	7431
s_1_1_contig82389	s_1_1NewScaffoldedcontig_1350	8392
s_1_1_contig190557	s_1_1NewScaffoldedcontig_1355	9674
s_1_1_contig132348	s_1_1NewScaffoldedcontig_1358	17615
s_1_1_contig156052	s_1_1NewScaffoldedcontig_1390	33108
s_1_1_contig205430	s_1_1NewScaffoldedcontig_1392	1
s_1_1_contig212182	s_1_1NewScaffoldedcontig_1392	2626
s_1_1_contig189326	s_1_1NewScaffoldedcontig_1392	2651
s_1_1_contig209358	s_1_1NewScaffoldedcontig_1392	3061
s_1_1_contig206769	s_1_1NewScaffoldedcontig_1392	3237
s_1_1_contig281297	s_1_1NewScaffoldedcontig_1392	3497
s_1_1_contig104908	s_1_1NewScaffoldedcontig_1401	21348
s_1_1_contig96648	s_1_1NewScaffoldedcontig_1405	29091
s_1_1_contig153623	s_1_1NewScaffoldedcontig_1405	38639
s_1_1_contig253281	s_1_1NewScaffoldedcontig_1408	8902
s_1_1_contig258417	s_1_1NewScaffoldedcontig_1415	101832
s_1_1_contig113543	s_1_1NewScaffoldedcontig_1422	100
s_1_1_contig243135	s_1_1NewScaffoldedcontig_1430	3617
s_1_1_contig260524	s_1_1NewScaffoldedcontig_1432	410
s_1_1_contig271072	s_1_1NewScaffoldedcontig_1442	6623
s_1_1_contig70744	s_1_1NewScaffoldedcontig_1443	37358
s_1_1_contig137347	s_1_1NewScaffoldedcontig_1446	1
s_1_1_contig206284	s_1_1NewScaffoldedcontig_1448	33264
s_1_1_contig119909	s_1_1NewScaffoldedcontig_1454	1
s_1_1_contig36878	s_1_1NewScaffoldedcontig_1457	14656
s_1_1_contig156709	s_1_1NewScaffoldedcontig_1460	1
s_1_1_contig60840	s_1_1NewScaffoldedcontig_1460	4961
s_1_1_contig226896	s_1_1NewScaffoldedcontig_1460	7620
s_1_1_contig163804	s_1_1NewScaffoldedcontig_1463	9843
s_1_1_contig186758	s_1_1NewScaffoldedcontig_1468	23808
s_1_1_contig51424	s_1_1NewScaffoldedcontig_1471	31010
s_1_1_contig92521	s_1_1NewScaffoldedcontig_1477	68405
s_1_1_contig253318	s_1_1NewScaffoldedcontig_1483	264
s_1_1_contig247943	s_1_1NewScaffoldedcontig_1504	1
s_1_1_contig61742	s_1_1NewScaffoldedcontig_1506	2002
s_1_1_contig270572	s_1_1NewScaffoldedcontig_1511	7624
s_1_1_contig184806	s_1_1NewScaffoldedcontig_1513	6887
s_1_1_contig199813	s_1_1NewScaffoldedcontig_1513	9909
s_1_1_contig255897	s_1_1NewScaffoldedcontig_1516	6011
s_1_1_contig251382	s_1_1NewScaffoldedcontig_1516	6054
s_1_1_contig231196	s_1_1NewScaffoldedcontig_1521	21054
s_1_1_contig94963	s_1_1NewScaffoldedcontig_1526	4209
s_1_1_contig242780	s_1_1NewScaffoldedcontig_1532	56415
s_1_1_contig121263	s_1_1NewScaffoldedcontig_1535	21728
s_1_1_contig201992	s_1_1NewScaffoldedcontig_1555	20
s_1_1_contig234474	s_1_1NewScaffoldedcontig_1559	5052
s_1_1_contig171431	s_1_1NewScaffoldedcontig_1570	221
s_1_1_contig91279	s_1_1NewScaffoldedcontig_1574	37331
s_1_1_contig271010	s_1_1NewScaffoldedcontig_1576	4863
s_1_1_contig60479	s_1_1NewScaffoldedcontig_1577	12442
s_1_1_contig264325	s_1_1NewScaffoldedcontig_1579	2862
s_1_1_contig211840	s_1_1NewScaffoldedcontig_1583	31342
s_1_1_contig64230	s_1_1NewScaffoldedcontig_1585	1
s_1_1_contig178582	s_1_1NewScaffoldedcontig_1593	1
s_1_1_contig76036	s_1_1NewScaffoldedcontig_1596	20
s_1_1_contig56685	s_1_1NewScaffoldedcontig_1598	4133
s_1_1_contig241976	s_1_1NewScaffoldedcontig_1611	6429
s_1_1_contig176996	s_1_1NewScaffoldedcontig_1611	12603
s_1_1_contig41607	s_1_1NewScaffoldedcontig_1613	1
s_1_1_contig281268	s_1_1NewScaffoldedcontig_1628	1
s_1_1_contig211281	s_1_1NewScaffoldedcontig_1628	162
s_1_1_contig218451	s_1_1NewScaffoldedcontig_1630	1
s_1_1_contig243841	s_1_1NewScaffoldedcontig_1631	6134
s_1_1_contig251198	s_1_1NewScaffoldedcontig_1636	2278
s_1_1_contig162510	s_1_1NewScaffoldedcontig_1641	6847
s_1_1_contig188596	s_1_1NewScaffoldedcontig_1643	1
s_1_1_contig92597	s_1_1NewScaffoldedcontig_1656	5212
s_1_1_contig276872	s_1_1NewScaffoldedcontig_1656	10918
s_1_1_contig141991	s_1_1NewScaffoldedcontig_1656	13233
s_1_1_contig71970	s_1_1NewScaffoldedcontig_1675	19989
s_1_1_contig161417	s_1_1NewScaffoldedcontig_1687	2372
s_1_1_contig256398	s_1_1NewScaffoldedcontig_1701	2591
s_1_1_contig121891	s_1_1NewScaffoldedcontig_1713	9448
s_1_1_contig207015	s_1_1NewScaffoldedcontig_1715	760
s_1_1_contig100101	s_1_1NewScaffoldedcontig_1725	4594
s_1_1_contig149126	s_1_1NewScaffoldedcontig_1727	297
s_1_1_contig281833	s_1_1NewScaffoldedcontig_1740	1
s_1_1_contig272596	s_1_1NewScaffoldedcontig_1740	16963
s_1_1_contig275121	s_1_1NewScaffoldedcontig_1745	25818
s_1_1_contig257674	s_1_1NewScaffoldedcontig_1747	512
s_1_1_contig47578	s_1_1NewScaffoldedcontig_1754	23419
s_1_1_contig212533	s_1_1NewScaffoldedcontig_1756	741
s_1_1_contig253636	s_1_1NewScaffoldedcontig_1757	1354
s_1_1_contig69213	s_1_1NewScaffoldedcontig_1762	1
s_1_1_contig238449	s_1_1NewScaffoldedcontig_1764	2358
s_1_1_contig9734	s_1_1NewScaffoldedcontig_1779	2677
s_1_1_contig257507	s_1_1NewScaffoldedcontig_1779	2677
s_1_1_contig192828	s_1_1NewScaffoldedcontig_1783	12894
s_1_1_contig34163	s_1_1NewScaffoldedcontig_1790	502
s_1_1_contig137378	s_1_1NewScaffoldedcontig_1790	2214
s_1_1_contig29578	s_1_1NewScaffoldedcontig_1795	10606
s_1_1_contig194983	s_1_1NewScaffoldedcontig_1809	1
s_1_1_contig277782	s_1_1NewScaffoldedcontig_1814	1
s_1_1_contig187861	s_1_1NewScaffoldedcontig_1822	17960
s_1_1_contig188401	s_1_1NewScaffoldedcontig_1823	46629
s_1_1_contig206021	s_1_1NewScaffoldedcontig_1825	25776
s_1_1_contig189763	s_1_1NewScaffoldedcontig_1826	2
s_1_1_contig211388	s_1_1NewScaffoldedcontig_1834	391
s_1_1_contig199060	s_1_1NewScaffoldedcontig_1836	27251
s_1_1_contig164818	s_1_1NewScaffoldedcontig_1836	30103
s_1_1_contig98314	s_1_1NewScaffoldedcontig_1862	33950
s_1_1_contig235058	s_1_1NewScaffoldedcontig_1866	1
s_1_1_contig247777	s_1_1NewScaffoldedcontig_1872	1
s_1_1_contig30999	s_1_1NewScaffoldedcontig_1889	11075
s_1_1_contig241596	s_1_1NewScaffoldedcontig_1894	1
s_1_1_contig269960	s_1_1NewScaffoldedcontig_1895	28
s_1_1_contig240683	s_1_1NewScaffoldedcontig_1896	14908
s_1_1_contig243773	s_1_1NewScaffoldedcontig_1899	7396
s_1_1_contig28431	s_1_1NewScaffoldedcontig_1900	1
s_1_1_contig193608	s_1_1NewScaffoldedcontig_1900	764
s_1_1_contig243768	s_1_1NewScaffoldedcontig_1901	24788
s_1_1_contig62439	s_1_1NewScaffoldedcontig_1901	87606
s_1_1_contig153569	s_1_1NewScaffoldedcontig_1907	1
s_1_1_contig94055	s_1_1NewScaffoldedcontig_1910	190
s_1_1_contig206268	s_1_1NewScaffoldedcontig_1911	9491
s_1_1_contig282425	s_1_1NewScaffoldedcontig_1914	14987
s_1_1_contig153814	s_1_1NewScaffoldedcontig_1915	3847
s_1_1_contig165858	s_1_1NewScaffoldedcontig_1930	8512
s_1_1_contig77607	s_1_1NewScaffoldedcontig_1930	32616
s_1_1_contig39465	s_1_1NewScaffoldedcontig_1932	8938
s_1_1_contig29254	s_1_1NewScaffoldedcontig_1932	17235
s_1_1_contig258366	s_1_1NewScaffoldedcontig_1932	36867
s_1_1_contig270163	s_1_1NewScaffoldedcontig_1933	27634
s_1_1_contig165012	s_1_1NewScaffoldedcontig_1934	27649
s_1_1_contig95086	s_1_1NewScaffoldedcontig_1936	1
s_1_1_contig226406	s_1_1NewScaffoldedcontig_1937	1
s_1_1_contig275581	s_1_1NewScaffoldedcontig_1945	1
s_1_1_contig56365	s_1_1NewScaffoldedcontig_1949	39693
s_1_1_contig131809	s_1_1NewScaffoldedcontig_1974	45346
s_1_1_contig232737	s_1_1NewScaffoldedcontig_1984	1
s_1_1_contig263870	s_1_1NewScaffoldedcontig_1987	1
s_1_1_contig206490	s_1_1NewScaffoldedcontig_1991	23387
s_1_1_contig146851	s_1_1NewScaffoldedcontig_1992	25
s_1_1_contig254391	s_1_1NewScaffoldedcontig_2003	3872
s_1_1_contig139579	s_1_1NewScaffoldedcontig_2010	34498
s_1_1_contig271298	s_1_1NewScaffoldedcontig_2016	7659
s_1_1_contig95789	s_1_1NewScaffoldedcontig_2024	1
s_1_1_contig111785	s_1_1NewScaffoldedcontig_2027	1
s_1_1_contig197070	s_1_1NewScaffoldedcontig_2034	1
s_1_1_contig188735	s_1_1NewScaffoldedcontig_2035	1
s_1_1_contig112946	s_1_1NewScaffoldedcontig_2035	54146
s_1_1_contig276730	s_1_1NewScaffoldedcontig_2041	11165
s_1_1_contig256669	s_1_1NewScaffoldedcontig_2041	11165
s_1_1_contig155401	s_1_1NewScaffoldedcontig_2041	11178
s_1_1_contig211681	s_1_1NewScaffoldedcontig_2041	11234
s_1_1_contig195059	s_1_1NewScaffoldedcontig_2042	8071
s_1_1_contig30404	s_1_1NewScaffoldedcontig_2045	6997
s_1_1_contig262054	s_1_1NewScaffoldedcontig_2047	3
s_1_1_contig211667	s_1_1NewScaffoldedcontig_2052	294
s_1_1_contig7216	s_1_1NewScaffoldedcontig_2054	13853
s_1_1_contig256437	s_1_1NewScaffoldedcontig_2062	596
s_1_1_contig117389	s_1_1NewScaffoldedcontig_2085	1
s_1_1_contig250464	s_1_1NewScaffoldedcontig_2097	1
s_1_1_contig154834	s_1_1NewScaffoldedcontig_2097	2534
s_1_1_contig214654	s_1_1NewScaffoldedcontig_2097	2653
s_1_1_contig222970	s_1_1NewScaffoldedcontig_2099	33503
s_1_1_contig197134	s_1_1NewScaffoldedcontig_2102	4827
s_1_1_contig81018	s_1_1NewScaffoldedcontig_2105	60
s_1_1_contig218983	s_1_1NewScaffoldedcontig_2105	44910
s_1_1_contig190280	s_1_1NewScaffoldedcontig_2113	2925
s_1_1_contig47404	s_1_1NewScaffoldedcontig_2113	3953
s_1_1_contig154307	s_1_1NewScaffoldedcontig_2116	694
s_1_1_contig235425	s_1_1NewScaffoldedcontig_2122	1
s_1_1_contig26739	s_1_1NewScaffoldedcontig_2124	14832
s_1_1_contig43583	s_1_1NewScaffoldedcontig_2125	3919
s_1_1_contig277733	s_1_1NewScaffoldedcontig_2125	40384
s_1_1_contig146314	s_1_1NewScaffoldedcontig_2127	19346
s_1_1_contig235099	s_1_1NewScaffoldedcontig_2142	16952
s_1_1_contig269038	s_1_1NewScaffoldedcontig_2148	15767
s_1_1_contig110883	s_1_1NewScaffoldedcontig_2149	8487
s_1_1_contig197755	s_1_1NewScaffoldedcontig_2149	34734
s_1_1_contig197494	s_1_1NewScaffoldedcontig_2149	34734
s_1_1_contig96745	s_1_1NewScaffoldedcontig_2153	2517
s_1_1_contig93715	s_1_1NewScaffoldedcontig_2155	1044
s_1_1_contig148768	s_1_1NewScaffoldedcontig_2155	7496
s_1_1_contig218679	s_1_1NewScaffoldedcontig_2156	4259
s_1_1_contig207584	s_1_1NewScaffoldedcontig_2159	1663
s_1_1_contig240409	s_1_1NewScaffoldedcontig_2164	1
s_1_1_contig155195	s_1_1NewScaffoldedcontig_2165	1
s_1_1_contig281095	s_1_1NewScaffoldedcontig_2166	1
s_1_1_contig105615	s_1_1NewScaffoldedcontig_2169	1
s_1_1_contig21332	s_1_1NewScaffoldedcontig_2173	35393
s_1_1_contig32560	s_1_1NewScaffoldedcontig_2178	1
s_1_1_contig270070	s_1_1NewScaffoldedcontig_2181	19341
s_1_1_contig257168	s_1_1NewScaffoldedcontig_2184	1
s_1_1_contig205790	s_1_1NewScaffoldedcontig_2194	36174
s_1_1_contig145423	s_1_1NewScaffoldedcontig_2199	14501
s_1_1_contig175265	s_1_1NewScaffoldedcontig_2201	588
s_1_1_contig189117	s_1_1NewScaffoldedcontig_2201	6274
s_1_1_contig32834	s_1_1NewScaffoldedcontig_2215	11072
s_1_1_contig147867	s_1_1NewScaffoldedcontig_2215	12254
s_1_1_contig276194	s_1_1NewScaffoldedcontig_2216	1
s_1_1_contig145443	s_1_1NewScaffoldedcontig_2230	3102
s_1_1_contig258750	s_1_1NewScaffoldedcontig_2238	5418
s_1_1_contig6273	s_1_1NewScaffoldedcontig_2247	69408
s_1_1_contig248937	s_1_1NewScaffoldedcontig_2253	5812
s_1_1_contig35233	s_1_1NewScaffoldedcontig_2262	10311
s_1_1_contig79195	s_1_1NewScaffoldedcontig_2268	3256
s_1_1_contig210124	s_1_1NewScaffoldedcontig_2280	1
s_1_1_contig257238	s_1_1NewScaffoldedcontig_2281	278
s_1_1_contig145958	s_1_1NewScaffoldedcontig_2287	1
s_1_1_contig276980	s_1_1NewScaffoldedcontig_2287	4041
s_1_1_contig245043	s_1_1NewScaffoldedcontig_2293	7338
s_1_1_contig243976	s_1_1NewScaffoldedcontig_2316	5261
s_1_1_contig131402	s_1_1NewScaffoldedcontig_2317	71238
s_1_1_contig235356	s_1_1NewScaffoldedcontig_2326	35009
s_1_1_contig129310	s_1_1NewScaffoldedcontig_2328	1
s_1_1_contig143806	s_1_1NewScaffoldedcontig_2334	31155
s_1_1_contig14759	s_1_1NewScaffoldedcontig_2335	14416
s_1_1_contig281575	s_1_1NewScaffoldedcontig_2353	3483
s_1_1_contig264761	s_1_1NewScaffoldedcontig_2361	5831
s_1_1_contig38644	s_1_1NewScaffoldedcontig_2364	2039
s_1_1_contig241956	s_1_1NewScaffoldedcontig_2384	91169
s_1_1_contig255391	s_1_1NewScaffoldedcontig_2385	112
s_1_1_contig255964	s_1_1NewScaffoldedcontig_2386	2590
s_1_1_contig212336	s_1_1NewScaffoldedcontig_2386	2638
s_1_1_contig154009	s_1_1NewScaffoldedcontig_2396	2845
s_1_1_contig169055	s_1_1NewScaffoldedcontig_2402	8258
s_1_1_contig256524	s_1_1NewScaffoldedcontig_2407	1
s_1_1_contig214424	s_1_1NewScaffoldedcontig_2408	3
s_1_1_contig281561	s_1_1NewScaffoldedcontig_2408	454
s_1_1_contig14607	s_1_1NewScaffoldedcontig_2411	1
s_1_1_contig180646	s_1_1NewScaffoldedcontig_2419	13030
s_1_1_contig270763	s_1_1NewScaffoldedcontig_2420	2076
s_1_1_contig227367	s_1_1NewScaffoldedcontig_2420	19484
s_1_1_contig208709	s_1_1NewScaffoldedcontig_2437	5438
s_1_1_contig4580	s_1_1NewScaffoldedcontig_2444	6733
s_1_1_contig199320	s_1_1NewScaffoldedcontig_2445	35206
s_1_1_contig12926	s_1_1NewScaffoldedcontig_2445	35769
s_1_1_contig80016	s_1_1NewScaffoldedcontig_2449	4323
s_1_1_contig255494	s_1_1NewScaffoldedcontig_2452	3538
s_1_1_contig127855	s_1_1NewScaffoldedcontig_2457	1
s_1_1_contig140084	s_1_1NewScaffoldedcontig_2459	4
s_1_1_contig100397	s_1_1NewScaffoldedcontig_2466	12755
s_1_1_contig155083	s_1_1NewScaffoldedcontig_2468	16110
s_1_1_contig145280	s_1_1NewScaffoldedcontig_2472	1
s_1_1_contig243256	s_1_1NewScaffoldedcontig_2474	3441
s_1_1_contig241356	s_1_1NewScaffoldedcontig_2482	2544
s_1_1_contig214100	s_1_1NewScaffoldedcontig_2482	2823
s_1_1_contig38823	s_1_1NewScaffoldedcontig_2493	17991
s_1_1_contig246245	s_1_1NewScaffoldedcontig_2505	10142
s_1_1_contig42057	s_1_1NewScaffoldedcontig_2507	4802
s_1_1_contig147173	s_1_1NewScaffoldedcontig_2513	9675
s_1_1_contig156209	s_1_1NewScaffoldedcontig_2516	28847
s_1_1_contig53809	s_1_1NewScaffoldedcontig_2516	49742
s_1_1_contig151985	s_1_1NewScaffoldedcontig_2519	1
s_1_1_contig280961	s_1_1NewScaffoldedcontig_2523	4061
s_1_1_contig207098	s_1_1NewScaffoldedcontig_2523	4114
s_1_1_contig108555	s_1_1NewScaffoldedcontig_2530	571
s_1_1_contig234213	s_1_1NewScaffoldedcontig_2541	11077
s_1_1_contig190014	s_1_1NewScaffoldedcontig_2557	2619
s_1_1_contig145128	s_1_1NewScaffoldedcontig_2565	1
s_1_1_contig5594	s_1_1NewScaffoldedcontig_2571	20833
s_1_1_contig74943	s_1_1NewScaffoldedcontig_2572	1
s_1_1_contig8928	s_1_1NewScaffoldedcontig_2577	1
s_1_1_contig231887	s_1_1NewScaffoldedcontig_2578	36034
s_1_1_contig143832	s_1_1NewScaffoldedcontig_2581	1406
s_1_1_contig281167	s_1_1NewScaffoldedcontig_2581	1760
s_1_1_contig259342	s_1_1NewScaffoldedcontig_2583	8352
s_1_1_contig129549	s_1_1NewScaffoldedcontig_2597	1
s_1_1_contig10500	s_1_1NewScaffoldedcontig_2601	1
s_1_1_contig211094	s_1_1NewScaffoldedcontig_2607	14231
s_1_1_contig236731	s_1_1NewScaffoldedcontig_2608	9526
s_1_1_contig272038	s_1_1NewScaffoldedcontig_2626	4876
s_1_1_contig126996	s_1_1NewScaffoldedcontig_2626	13385
s_1_1_contig100621	s_1_1NewScaffoldedcontig_2626	24183
s_1_1_contig180578	s_1_1NewScaffoldedcontig_2627	16913
s_1_1_contig10662	s_1_1NewScaffoldedcontig_2631	38365
s_1_1_contig145516	s_1_1NewScaffoldedcontig_2636	1055
s_1_1_contig42926	s_1_1NewScaffoldedcontig_2637	8516
s_1_1_contig188920	s_1_1NewScaffoldedcontig_2644	5063
s_1_1_contig101696	s_1_1NewScaffoldedcontig_2646	25
s_1_1_contig214840	s_1_1NewScaffoldedcontig_2653	1
s_1_1_contig96402	s_1_1NewScaffoldedcontig_2659	18709
s_1_1_contig42284	s_1_1NewScaffoldedcontig_2669	22879
s_1_1_contig10171	s_1_1NewScaffoldedcontig_2675	8249
s_1_1_contig241485	s_1_1NewScaffoldedcontig_2678	16873
s_1_1_contig198840	s_1_1NewScaffoldedcontig_2686	11497
s_1_1_contig112553	s_1_1NewScaffoldedcontig_2686	13284
s_1_1_contig147676	s_1_1NewScaffoldedcontig_2690	1361
s_1_1_contig125689	s_1_1NewScaffoldedcontig_2690	18115
s_1_1_contig93406	s_1_1NewScaffoldedcontig_2704	8957
s_1_1_contig16009	s_1_1NewScaffoldedcontig_2706	26328
s_1_1_contig125360	s_1_1NewScaffoldedcontig_2706	26898
s_1_1_contig282433	s_1_1NewScaffoldedcontig_2726	1
s_1_1_contig43213	s_1_1NewScaffoldedcontig_2729	2204
s_1_1_contig219964	s_1_1NewScaffoldedcontig_2733	1
s_1_1_contig238541	s_1_1NewScaffoldedcontig_2744	38003
s_1_1_contig248212	s_1_1NewScaffoldedcontig_2745	1499
s_1_1_contig89791	s_1_1NewScaffoldedcontig_2759	22
s_1_1_contig169368	s_1_1NewScaffoldedcontig_2761	1275
s_1_1_contig259216	s_1_1NewScaffoldedcontig_2762	1
s_1_1_contig47250	s_1_1NewScaffoldedcontig_2768	7992
s_1_1_contig250806	s_1_1NewScaffoldedcontig_2768	8333
s_1_1_contig9149	s_1_1NewScaffoldedcontig_2768	11656
s_1_1_contig19573	s_1_1NewScaffoldedcontig_2775	1
s_1_1_contig211363	s_1_1NewScaffoldedcontig_2776	1382
s_1_1_contig243207	s_1_1NewScaffoldedcontig_2781	18195
s_1_1_contig206631	s_1_1NewScaffoldedcontig_2782	2157
s_1_1_contig144318	s_1_1NewScaffoldedcontig_2783	7515
s_1_1_contig45970	s_1_1NewScaffoldedcontig_2790	29837
s_1_1_contig90056	s_1_1NewScaffoldedcontig_2791	11089
s_1_1_contig48476	s_1_1NewScaffoldedcontig_2795	1504
s_1_1_contig32971	s_1_1NewScaffoldedcontig_2800	491
s_1_1_contig143203	s_1_1NewScaffoldedcontig_2819	1
s_1_1_contig154229	s_1_1NewScaffoldedcontig_2822	5266
s_1_1_contig174239	s_1_1NewScaffoldedcontig_2826	8502
s_1_1_contig149344	s_1_1NewScaffoldedcontig_2826	17934
s_1_1_contig270575	s_1_1NewScaffoldedcontig_2834	1
s_1_1_contig2969	s_1_1NewScaffoldedcontig_2835	11712
s_1_1_contig171920	s_1_1NewScaffoldedcontig_2842	23
s_1_1_contig115339	s_1_1NewScaffoldedcontig_2842	4185
s_1_1_contig236487	s_1_1NewScaffoldedcontig_2843	11004
s_1_1_contig242226	s_1_1NewScaffoldedcontig_2844	42957
s_1_1_contig102546	s_1_1NewScaffoldedcontig_2860	4801
s_1_1_contig177899	s_1_1NewScaffoldedcontig_2862	3990
s_1_1_contig141163	s_1_1NewScaffoldedcontig_2863	9352
s_1_1_contig103566	s_1_1NewScaffoldedcontig_2864	13644
s_1_1_contig254785	s_1_1NewScaffoldedcontig_2865	5687
s_1_1_contig183901	s_1_1NewScaffoldedcontig_2901	5132
s_1_1_contig259017	s_1_1NewScaffoldedcontig_2903	291
s_1_1_contig254583	s_1_1NewScaffoldedcontig_2917	2346
s_1_1_contig6526	s_1_1NewScaffoldedcontig_2932	47
s_1_1_contig114214	s_1_1NewScaffoldedcontig_2934	1577
s_1_1_contig275957	s_1_1NewScaffoldedcontig_2936	14852
s_1_1_contig37048	s_1_1NewScaffoldedcontig_2937	1
s_1_1_contig131227	s_1_1NewScaffoldedcontig_2944	1
s_1_1_contig167849	s_1_1NewScaffoldedcontig_2948	4769
s_1_1_contig23467	s_1_1NewScaffoldedcontig_2961	1
s_1_1_contig72861	s_1_1NewScaffoldedcontig_2963	14765
s_1_1_contig236575	s_1_1NewScaffoldedcontig_2964	1
s_1_1_contig214374	s_1_1NewScaffoldedcontig_2965	10294
s_1_1_contig253369	s_1_1NewScaffoldedcontig_2968	2347
s_1_1_contig186763	s_1_1NewScaffoldedcontig_2973	91
s_1_1_contig253973	s_1_1NewScaffoldedcontig_2975	1690
s_1_1_contig238547	s_1_1NewScaffoldedcontig_2981	4582
s_1_1_contig91289	s_1_1NewScaffoldedcontig_2982	1
s_1_1_contig164435	s_1_1NewScaffoldedcontig_2985	14488
s_1_1_contig197587	s_1_1NewScaffoldedcontig_2991	1
s_1_1_contig207942	s_1_1NewScaffoldedcontig_2991	1
s_1_1_contig141451	s_1_1NewScaffoldedcontig_3000	33962
s_1_1_contig136829	s_1_1NewScaffoldedcontig_3001	14959
s_1_1_contig251176	s_1_1NewScaffoldedcontig_3004	6908
s_1_1_contig257279	s_1_1NewScaffoldedcontig_3004	7216
s_1_1_contig245361	s_1_1NewScaffoldedcontig_3004	8100
s_1_1_contig154982	s_1_1NewScaffoldedcontig_3013	28910
s_1_1_contig220356	s_1_1NewScaffoldedcontig_3021	212
s_1_1_contig258247	s_1_1NewScaffoldedcontig_3024	51190
s_1_1_contig258680	s_1_1NewScaffoldedcontig_3024	51198
s_1_1_contig198936	s_1_1NewScaffoldedcontig_3034	3034
s_1_1_contig89161	s_1_1NewScaffoldedcontig_3035	6299
s_1_1_contig256074	s_1_1NewScaffoldedcontig_3041	2172
s_1_1_contig210792	s_1_1NewScaffoldedcontig_3043	1
s_1_1_contig41755	s_1_1NewScaffoldedcontig_3046	7493
s_1_1_contig96414	s_1_1NewScaffoldedcontig_3046	7717
s_1_1_contig257670	s_1_1NewScaffoldedcontig_3050	427
s_1_1_contig129328	s_1_1NewScaffoldedcontig_3057	1
s_1_1_contig91198	s_1_1NewScaffoldedcontig_3075	1
s_1_1_contig122417	s_1_1NewScaffoldedcontig_3086	1
s_1_1_contig115460	s_1_1NewScaffoldedcontig_3090	2105
s_1_1_contig124382	s_1_1NewScaffoldedcontig_3090	4354
s_1_1_contig274735	s_1_1NewScaffoldedcontig_3090	28138
s_1_1_contig200967	s_1_1NewScaffoldedcontig_3091	2291
s_1_1_contig262725	s_1_1NewScaffoldedcontig_3092	22
s_1_1_contig136414	s_1_1NewScaffoldedcontig_3094	686
s_1_1_contig276431	s_1_1NewScaffoldedcontig_3095	14671
s_1_1_contig173632	s_1_1NewScaffoldedcontig_3103	19383
s_1_1_contig108803	s_1_1NewScaffoldedcontig_3117	3175
s_1_1_contig148693	s_1_1NewScaffoldedcontig_3123	569
s_1_1_contig3958	s_1_1NewScaffoldedcontig_3125	3715
s_1_1_contig223882	s_1_1NewScaffoldedcontig_3130	1
s_1_1_contig192120	s_1_1NewScaffoldedcontig_3138	5939
s_1_1_contig112568	s_1_1NewScaffoldedcontig_3144	1406
s_1_1_contig60178	s_1_1NewScaffoldedcontig_3147	1097
s_1_1_contig186859	s_1_1NewScaffoldedcontig_3147	11853
s_1_1_contig273843	s_1_1NewScaffoldedcontig_3148	1
s_1_1_contig92202	s_1_1NewScaffoldedcontig_3148	16074
s_1_1_contig136760	s_1_1NewScaffoldedcontig_3153	567
s_1_1_contig226701	s_1_1NewScaffoldedcontig_3157	9472
s_1_1_contig132293	s_1_1NewScaffoldedcontig_3158	27474
s_1_1_contig149919	s_1_1NewScaffoldedcontig_3163	9435
s_1_1_contig216486	s_1_1NewScaffoldedcontig_3182	10328
s_1_1_contig169704	s_1_1NewScaffoldedcontig_3183	34618
s_1_1_contig264717	s_1_1NewScaffoldedcontig_3194	1
s_1_1_contig269082	s_1_1NewScaffoldedcontig_3195	5323
s_1_1_contig202494	s_1_1NewScaffoldedcontig_3197	10801
s_1_1_contig187549	s_1_1NewScaffoldedcontig_3204	5032
s_1_1_contig273533	s_1_1NewScaffoldedcontig_3210	1
s_1_1_contig261045	s_1_1NewScaffoldedcontig_3216	1
s_1_1_contig200066	s_1_1NewScaffoldedcontig_3217	16637
s_1_1_contig196601	s_1_1NewScaffoldedcontig_3232	2591
s_1_1_contig137621	s_1_1NewScaffoldedcontig_3251	13
s_1_1_contig225728	s_1_1NewScaffoldedcontig_3252	5268
s_1_1_contig16304	s_1_1NewScaffoldedcontig_3253	36
s_1_1_contig14588	s_1_1NewScaffoldedcontig_3260	1
s_1_1_contig184850	s_1_1NewScaffoldedcontig_3270	7941
s_1_1_contig235618	s_1_1NewScaffoldedcontig_3274	1
s_1_1_contig102590	s_1_1NewScaffoldedcontig_3282	1
s_1_1_contig100455	s_1_1NewScaffoldedcontig_3289	13083
s_1_1_contig7027	s_1_1NewScaffoldedcontig_3296	19484
s_1_1_contig209706	s_1_1NewScaffoldedcontig_3306	10138
s_1_1_contig206782	s_1_1NewScaffoldedcontig_3317	337
s_1_1_contig106486	s_1_1NewScaffoldedcontig_3324	82
s_1_1_contig235927	s_1_1NewScaffoldedcontig_3329	10502
s_1_1_contig280431	s_1_1NewScaffoldedcontig_3329	18217
s_1_1_contig40125	s_1_1NewScaffoldedcontig_3350	4859
s_1_1_contig76496	s_1_1NewScaffoldedcontig_3352	11442
s_1_1_contig82037	s_1_1NewScaffoldedcontig_3355	15140
s_1_1_contig244280	s_1_1NewScaffoldedcontig_3363	1
s_1_1_contig257561	s_1_1NewScaffoldedcontig_3363	1997
s_1_1_contig151822	s_1_1NewScaffoldedcontig_3378	12591
s_1_1_contig46031	s_1_1NewScaffoldedcontig_3384	2990
s_1_1_contig60983	s_1_1NewScaffoldedcontig_3403	14516
s_1_1_contig206913	s_1_1NewScaffoldedcontig_3405	36
s_1_1_contig16417	s_1_1NewScaffoldedcontig_3408	1
s_1_1_contig181718	s_1_1NewScaffoldedcontig_3411	1
s_1_1_contig131556	s_1_1NewScaffoldedcontig_3413	1
s_1_1_contig253595	s_1_1NewScaffoldedcontig_3413	1556
s_1_1_contig268473	s_1_1NewScaffoldedcontig_3416	23110
s_1_1_contig185914	s_1_1NewScaffoldedcontig_3419	1
s_1_1_contig193869	s_1_1NewScaffoldedcontig_3426	180
s_1_1_contig129576	s_1_1NewScaffoldedcontig_3428	8864
s_1_1_contig69347	s_1_1NewScaffoldedcontig_3431	11
s_1_1_contig153980	s_1_1NewScaffoldedcontig_3447	11940
s_1_1_contig237247	s_1_1NewScaffoldedcontig_3453	5479
s_1_1_contig19380	s_1_1NewScaffoldedcontig_3456	2073
s_1_1_contig230768	s_1_1NewScaffoldedcontig_3458	1
s_1_1_contig241004	s_1_1NewScaffoldedcontig_3458	18920
s_1_1_contig243113	s_1_1NewScaffoldedcontig_3459	11983
s_1_1_contig150557	s_1_1NewScaffoldedcontig_3470	8034
s_1_1_contig169856	s_1_1NewScaffoldedcontig_3470	29012
s_1_1_contig155672	s_1_1NewScaffoldedcontig_3471	2846
s_1_1_contig157122	s_1_1NewScaffoldedcontig_3482	18723
s_1_1_contig90356	s_1_1NewScaffoldedcontig_3484	4691
s_1_1_contig182139	s_1_1NewScaffoldedcontig_3493	9472
s_1_1_contig131995	s_1_1NewScaffoldedcontig_3499	18444
s_1_1_contig250797	s_1_1NewScaffoldedcontig_3500	1
s_1_1_contig149626	s_1_1NewScaffoldedcontig_3500	233
s_1_1_contig213212	s_1_1NewScaffoldedcontig_3513	387
s_1_1_contig70988	s_1_1NewScaffoldedcontig_3515	30664
s_1_1_contig259174	s_1_1NewScaffoldedcontig_3517	353
s_1_1_contig39321	s_1_1NewScaffoldedcontig_3531	8414
s_1_1_contig170498	s_1_1NewScaffoldedcontig_3531	35478
s_1_1_contig211179	s_1_1NewScaffoldedcontig_3551	1639
s_1_1_contig12812	s_1_1NewScaffoldedcontig_3561	9784
s_1_1_contig75682	s_1_1NewScaffoldedcontig_3565	1
s_1_1_contig180640	s_1_1NewScaffoldedcontig_3567	21077
s_1_1_contig178362	s_1_1NewScaffoldedcontig_3567	21800
s_1_1_contig67152	s_1_1NewScaffoldedcontig_3567	22779
s_1_1_contig277263	s_1_1NewScaffoldedcontig_3582	20803
s_1_1_contig90901	s_1_1NewScaffoldedcontig_3585	33667
s_1_1_contig226009	s_1_1NewScaffoldedcontig_3587	92016
s_1_1_contig274754	s_1_1NewScaffoldedcontig_3597	32889
s_1_1_contig14811	s_1_1NewScaffoldedcontig_3600	1
s_1_1_contig154605	s_1_1NewScaffoldedcontig_3616	1
s_1_1_contig253746	s_1_1NewScaffoldedcontig_3619	1
s_1_1_contig136243	s_1_1NewScaffoldedcontig_3622	32905
s_1_1_contig251383	s_1_1NewScaffoldedcontig_3626	1
s_1_1_contig197937	s_1_1NewScaffoldedcontig_3626	2011
s_1_1_contig148660	s_1_1NewScaffoldedcontig_3660	141
s_1_1_contig253240	s_1_1NewScaffoldedcontig_3661	5772
s_1_1_contig212958	s_1_1NewScaffoldedcontig_3681	838
s_1_1_contig194681	s_1_1NewScaffoldedcontig_3694	1
s_1_1_contig86058	s_1_1NewScaffoldedcontig_3699	13022
s_1_1_contig123506	s_1_1NewScaffoldedcontig_3702	13261
s_1_1_contig268821	s_1_1NewScaffoldedcontig_3718	22276
s_1_1_contig189350	s_1_1NewScaffoldedcontig_3724	1
s_1_1_contig282582	s_1_1NewScaffoldedcontig_3725	11504
s_1_1_contig212377	s_1_1NewScaffoldedcontig_3725	11569
s_1_1_contig133658	s_1_1NewScaffoldedcontig_3727	8
s_1_1_contig36227	s_1_1NewScaffoldedcontig_3729	4973
s_1_1_contig133374	s_1_1NewScaffoldedcontig_3737	1
s_1_1_contig138544	s_1_1NewScaffoldedcontig_3746	25399
s_1_1_contig124276	s_1_1NewScaffoldedcontig_3753	2205
s_1_1_contig188439	s_1_1NewScaffoldedcontig_3771	1
s_1_1_contig174784	s_1_1NewScaffoldedcontig_3771	21286
s_1_1_contig8367	s_1_1NewScaffoldedcontig_3778	1
s_1_1_contig266355	s_1_1NewScaffoldedcontig_3780	70750
s_1_1_contig102910	s_1_1NewScaffoldedcontig_3784	66022
s_1_1_contig207694	s_1_1NewScaffoldedcontig_3818	1
s_1_1_contig97002	s_1_1NewScaffoldedcontig_3826	1
s_1_1_contig251955	s_1_1NewScaffoldedcontig_3834	2120
s_1_1_contig51098	s_1_1NewScaffoldedcontig_3837	10460
s_1_1_contig256999	s_1_1NewScaffoldedcontig_3847	418
s_1_1_contig136625	s_1_1NewScaffoldedcontig_3847	36151
s_1_1_contig144843	s_1_1NewScaffoldedcontig_3848	10467
s_1_1_contig215787	s_1_1NewScaffoldedcontig_3849	1
s_1_1_contig244984	s_1_1NewScaffoldedcontig_3849	3404
s_1_1_contig185090	s_1_1NewScaffoldedcontig_3855	1
s_1_1_contig272095	s_1_1NewScaffoldedcontig_3864	22068
s_1_1_contig31596	s_1_1NewScaffoldedcontig_3864	25508
s_1_1_contig186579	s_1_1NewScaffoldedcontig_3868	1882
s_1_1_contig50628	s_1_1NewScaffoldedcontig_3871	3584
s_1_1_contig111058	s_1_1NewScaffoldedcontig_3877	16384
s_1_1_contig203564	s_1_1NewScaffoldedcontig_3880	426
s_1_1_contig260662	s_1_1NewScaffoldedcontig_3885	4155
s_1_1_contig116908	s_1_1NewScaffoldedcontig_3889	31652
s_1_1_contig8892	s_1_1NewScaffoldedcontig_3890	1
s_1_1_contig80935	s_1_1NewScaffoldedcontig_3895	162
s_1_1_contig23615	s_1_1NewScaffoldedcontig_3898	9830
s_1_1_contig152741	s_1_1NewScaffoldedcontig_3906	20937
s_1_1_contig154505	s_1_1NewScaffoldedcontig_3915	5500
s_1_1_contig138109	s_1_1NewScaffoldedcontig_3918	15261
s_1_1_contig277221	s_1_1NewScaffoldedcontig_3932	14328
s_1_1_contig110684	s_1_1NewScaffoldedcontig_3937	7580
s_1_1_contig252781	s_1_1NewScaffoldedcontig_3938	6645
s_1_1_contig242291	s_1_1NewScaffoldedcontig_3939	1419
s_1_1_contig150998	s_1_1NewScaffoldedcontig_3939	7937
s_1_1_contig31057	s_1_1NewScaffoldedcontig_3939	9405
s_1_1_contig137843	s_1_1NewScaffoldedcontig_3941	1
s_1_1_contig252822	s_1_1NewScaffoldedcontig_3942	1
s_1_1_contig9746	s_1_1NewScaffoldedcontig_3953	1
s_1_1_contig7655	s_1_1NewScaffoldedcontig_3957	28518
s_1_1_contig135167	s_1_1NewScaffoldedcontig_3960	1
s_1_1_contig269279	s_1_1NewScaffoldedcontig_3972	9
s_1_1_contig250201	s_1_1NewScaffoldedcontig_3980	24438
s_1_1_contig50297	s_1_1NewScaffoldedcontig_4012	6
s_1_1_contig33405	s_1_1NewScaffoldedcontig_4018	7681
s_1_1_contig212868	s_1_1NewScaffoldedcontig_4021	46
s_1_1_contig259176	s_1_1NewScaffoldedcontig_4027	519
s_1_1_contig9811	s_1_1NewScaffoldedcontig_4036	464
s_1_1_contig13019	s_1_1NewScaffoldedcontig_4040	10750
s_1_1_contig256473	s_1_1NewScaffoldedcontig_4042	4602
s_1_1_contig1608	s_1_1NewScaffoldedcontig_4042	4606
s_1_1_contig188573	s_1_1NewScaffoldedcontig_4042	4881
s_1_1_contig212223	s_1_1NewScaffoldedcontig_4042	27492
s_1_1_contig238921	s_1_1NewScaffoldedcontig_4068	1
s_1_1_contig112014	s_1_1NewScaffoldedcontig_4068	22806
s_1_1_contig127903	s_1_1NewScaffoldedcontig_4075	3508
s_1_1_contig203235	s_1_1NewScaffoldedcontig_4091	18655
s_1_1_contig197068	s_1_1NewScaffoldedcontig_4103	1
s_1_1_contig271079	s_1_1NewScaffoldedcontig_4109	2162
s_1_1_contig190574	s_1_1NewScaffoldedcontig_4116	1
s_1_1_contig28073	s_1_1NewScaffoldedcontig_4117	13775
s_1_1_contig165895	s_1_1NewScaffoldedcontig_4127	65
s_1_1_contig126339	s_1_1NewScaffoldedcontig_4127	15141
s_1_1_contig10195	s_1_1NewScaffoldedcontig_4140	21031
s_1_1_contig255894	s_1_1NewScaffoldedcontig_4144	1915
s_1_1_contig79982	s_1_1NewScaffoldedcontig_4145	4823
s_1_1_contig194068	s_1_1NewScaffoldedcontig_4148	1
s_1_1_contig149738	s_1_1NewScaffoldedcontig_4157	1
s_1_1_contig50020	s_1_1NewScaffoldedcontig_4162	16654
s_1_1_contig217287	s_1_1NewScaffoldedcontig_4176	1
s_1_1_contig278747	s_1_1NewScaffoldedcontig_4178	5124
s_1_1_contig123141	s_1_1NewScaffoldedcontig_4184	1
s_1_1_contig162701	s_1_1NewScaffoldedcontig_4201	7707
s_1_1_contig171009	s_1_1NewScaffoldedcontig_4209	7
s_1_1_contig254618	s_1_1NewScaffoldedcontig_4209	179
s_1_1_contig246189	s_1_1NewScaffoldedcontig_4209	239
s_1_1_contig257725	s_1_1NewScaffoldedcontig_4209	262
s_1_1_contig250354	s_1_1NewScaffoldedcontig_4209	290
s_1_1_contig117618	s_1_1NewScaffoldedcontig_4212	4492
s_1_1_contig137210	s_1_1NewScaffoldedcontig_4221	193
s_1_1_contig206978	s_1_1NewScaffoldedcontig_4221	30677
s_1_1_contig174923	s_1_1NewScaffoldedcontig_4224	4904
s_1_1_contig200679	s_1_1NewScaffoldedcontig_4225	21136
s_1_1_contig42430	s_1_1NewScaffoldedcontig_4240	20856
s_1_1_contig235074	s_1_1NewScaffoldedcontig_4241	19029
s_1_1_contig251210	s_1_1NewScaffoldedcontig_4277	12843
s_1_1_contig178749	s_1_1NewScaffoldedcontig_4291	12804
s_1_1_contig39175	s_1_1NewScaffoldedcontig_4292	3726
s_1_1_contig246164	s_1_1NewScaffoldedcontig_4292	4016
s_1_1_contig119255	s_1_1NewScaffoldedcontig_4294	31512
s_1_1_contig215720	s_1_1NewScaffoldedcontig_4301	19290
s_1_1_contig165900	s_1_1NewScaffoldedcontig_4315	33475
s_1_1_contig46059	s_1_1NewScaffoldedcontig_4328	4916
s_1_1_contig255459	s_1_1NewScaffoldedcontig_4329	10971
s_1_1_contig148930	s_1_1NewScaffoldedcontig_4363	19173
s_1_1_contig167697	s_1_1NewScaffoldedcontig_4377	24034
s_1_1_contig253785	s_1_1NewScaffoldedcontig_4381	1
s_1_1_contig206888	s_1_1NewScaffoldedcontig_4393	1
s_1_1_contig134211	s_1_1NewScaffoldedcontig_4402	1
s_1_1_contig96305	s_1_1NewScaffoldedcontig_4412	17727
s_1_1_contig258305	s_1_1NewScaffoldedcontig_4413	1
s_1_1_contig92863	s_1_1NewScaffoldedcontig_4413	10292
s_1_1_contig217311	s_1_1NewScaffoldedcontig_4414	1
s_1_1_contig164857	s_1_1NewScaffoldedcontig_4417	1027
s_1_1_contig281140	s_1_1NewScaffoldedcontig_4421	1
s_1_1_contig109436	s_1_1NewScaffoldedcontig_4422	72
s_1_1_contig267169	s_1_1NewScaffoldedcontig_4427	1
s_1_1_contig191336	s_1_1NewScaffoldedcontig_4431	62375
s_1_1_contig154222	s_1_1NewScaffoldedcontig_4435	1
s_1_1_contig136707	s_1_1NewScaffoldedcontig_4442	18683
s_1_1_contig167217	s_1_1NewScaffoldedcontig_4446	511
s_1_1_contig105984	s_1_1NewScaffoldedcontig_4448	27630
s_1_1_contig259008	s_1_1NewScaffoldedcontig_4458	56
s_1_1_contig150953	s_1_1NewScaffoldedcontig_4459	21447
s_1_1_contig245201	s_1_1NewScaffoldedcontig_4461	61272
s_1_1_contig91760	s_1_1NewScaffoldedcontig_4470	2282
s_1_1_contig252130	s_1_1NewScaffoldedcontig_4496	7854
s_1_1_contig96602	s_1_1NewScaffoldedcontig_4504	1
s_1_1_contig161391	s_1_1NewScaffoldedcontig_4509	1
s_1_1_contig257225	s_1_1NewScaffoldedcontig_4518	2
s_1_1_contig136778	s_1_1NewScaffoldedcontig_4529	72359
s_1_1_contig152193	s_1_1NewScaffoldedcontig_4546	1
s_1_1_contig204935	s_1_1NewScaffoldedcontig_4546	433
s_1_1_contig107442	s_1_1NewScaffoldedcontig_4546	9260
s_1_1_contig180494	s_1_1NewScaffoldedcontig_4547	1029
s_1_1_contig71129	s_1_1NewScaffoldedcontig_4557	159
s_1_1_contig176270	s_1_1NewScaffoldedcontig_4568	1
s_1_1_contig274595	s_1_1NewScaffoldedcontig_4569	38396
s_1_1_contig139033	s_1_1NewScaffoldedcontig_4577	1
s_1_1_contig118084	s_1_1NewScaffoldedcontig_4602	1
s_1_1_contig157501	s_1_1NewScaffoldedcontig_4616	1
s_1_1_contig256176	s_1_1NewScaffoldedcontig_4620	30
s_1_1_contig86048	s_1_1NewScaffoldedcontig_4629	59633
s_1_1_contig53767	s_1_1NewScaffoldedcontig_4643	33018
s_1_1_contig278439	s_1_1NewScaffoldedcontig_4646	61951
s_1_1_contig31718	s_1_1NewScaffoldedcontig_4648	14490
s_1_1_contig44973	s_1_1NewScaffoldedcontig_4649	5267
s_1_1_contig65076	s_1_1NewScaffoldedcontig_4661	1
s_1_1_contig214713	s_1_1NewScaffoldedcontig_4679	2731
s_1_1_contig98136	s_1_1NewScaffoldedcontig_4682	5030
s_1_1_contig249231	s_1_1NewScaffoldedcontig_4686	6343
s_1_1_contig55466	s_1_1NewScaffoldedcontig_4703	1
s_1_1_contig212781	s_1_1NewScaffoldedcontig_4711	1
s_1_1_contig210926	s_1_1NewScaffoldedcontig_4716	1
s_1_1_contig207658	s_1_1NewScaffoldedcontig_4716	1
s_1_1_contig256361	s_1_1NewScaffoldedcontig_4721	4977
s_1_1_contig254145	s_1_1NewScaffoldedcontig_4721	8364
s_1_1_contig137208	s_1_1NewScaffoldedcontig_4722	1
s_1_1_contig211624	s_1_1NewScaffoldedcontig_4722	7835
s_1_1_contig69016	s_1_1NewScaffoldedcontig_4724	844
s_1_1_contig246465	s_1_1NewScaffoldedcontig_4732	1
s_1_1_contig244810	s_1_1NewScaffoldedcontig_4734	8744
s_1_1_contig17100	s_1_1NewScaffoldedcontig_4737	4738
s_1_1_contig233284	s_1_1NewScaffoldedcontig_4756	1807
s_1_1_contig219974	s_1_1NewScaffoldedcontig_4764	38071
s_1_1_contig54564	s_1_1NewScaffoldedcontig_4768	1
s_1_1_contig200472	s_1_1NewScaffoldedcontig_4772	1760
s_1_1_contig208673	s_1_1NewScaffoldedcontig_4792	1339
s_1_1_contig114702	s_1_1NewScaffoldedcontig_4796	3606
s_1_1_contig112251	s_1_1NewScaffoldedcontig_4806	1166
s_1_1_contig243381	s_1_1NewScaffoldedcontig_4807	1
s_1_1_contig129195	s_1_1NewScaffoldedcontig_4808	68
s_1_1_contig49826	s_1_1NewScaffoldedcontig_4810	2236
s_1_1_contig159235	s_1_1NewScaffoldedcontig_4812	964
s_1_1_contig31204	s_1_1NewScaffoldedcontig_4818	11531
s_1_1_contig247023	s_1_1NewScaffoldedcontig_4825	19677
s_1_1_contig127134	s_1_1NewScaffoldedcontig_4828	4528
s_1_1_contig100035	s_1_1NewScaffoldedcontig_4841	5198
s_1_1_contig145427	s_1_1NewScaffoldedcontig_4853	1
s_1_1_contig248793	s_1_1NewScaffoldedcontig_4871	28467
s_1_1_contig224493	s_1_1NewScaffoldedcontig_4895	872
s_1_1_contig87030	s_1_1NewScaffoldedcontig_4908	15915
s_1_1_contig42172	s_1_1NewScaffoldedcontig_4909	20534
s_1_1_contig17221	s_1_1NewScaffoldedcontig_4939	35616
s_1_1_contig198392	s_1_1NewScaffoldedcontig_4939	37542
s_1_1_contig212139	s_1_1NewScaffoldedcontig_4941	11621
s_1_1_contig278488	s_1_1NewScaffoldedcontig_4978	1
s_1_1_contig170106	s_1_1NewScaffoldedcontig_4978	290
s_1_1_contig244770	s_1_1NewScaffoldedcontig_4978	4958
s_1_1_contig29075	s_1_1NewScaffoldedcontig_4985	28508
s_1_1_contig42596	s_1_1NewScaffoldedcontig_4985	42301
s_1_1_contig100837	s_1_1NewScaffoldedcontig_4999	1
s_1_1_contig144736	s_1_1NewScaffoldedcontig_5007	6894
s_1_1_contig62288	s_1_1NewScaffoldedcontig_5014	17693
s_1_1_contig127523	s_1_1NewScaffoldedcontig_5036	1
s_1_1_contig277897	s_1_1NewScaffoldedcontig_5044	19150
s_1_1_contig263723	s_1_1NewScaffoldedcontig_5048	36525
s_1_1_contig128572	s_1_1NewScaffoldedcontig_5063	16922
s_1_1_contig50828	s_1_1NewScaffoldedcontig_5063	21404
s_1_1_contig74469	s_1_1NewScaffoldedcontig_5065	7753
s_1_1_contig242662	s_1_1NewScaffoldedcontig_5095	25299
s_1_1_contig269850	s_1_1NewScaffoldedcontig_5115	1
s_1_1_contig201021	s_1_1NewScaffoldedcontig_5120	25258
s_1_1_contig22484	s_1_1NewScaffoldedcontig_5128	17624
s_1_1_contig183537	s_1_1NewScaffoldedcontig_5131	1
s_1_1_contig269848	s_1_1NewScaffoldedcontig_5131	36473
s_1_1_contig246092	s_1_1NewScaffoldedcontig_5136	25788
s_1_1_contig258398	s_1_1NewScaffoldedcontig_5137	14888
s_1_1_contig203389	s_1_1NewScaffoldedcontig_5145	14502
s_1_1_contig251820	s_1_1NewScaffoldedcontig_5154	1
s_1_1_contig4667	s_1_1NewScaffoldedcontig_5154	64656
s_1_1_contig256042	s_1_1NewScaffoldedcontig_5157	515
s_1_1_contig259380	s_1_1NewScaffoldedcontig_5164	3242
s_1_1_contig79733	s_1_1NewScaffoldedcontig_5165	1
s_1_1_contig135979	s_1_1NewScaffoldedcontig_5168	1
s_1_1_contig12028	s_1_1NewScaffoldedcontig_5173	3143
s_1_1_contig153378	s_1_1NewScaffoldedcontig_5204	1
s_1_1_contig222162	s_1_1NewScaffoldedcontig_5205	28752
s_1_1_contig149085	s_1_1NewScaffoldedcontig_5213	225
s_1_1_contig127053	s_1_1NewScaffoldedcontig_5213	4112
s_1_1_contig270668	s_1_1NewScaffoldedcontig_5234	8215
s_1_1_contig145145	s_1_1NewScaffoldedcontig_5242	8657
s_1_1_contig25762	s_1_1NewScaffoldedcontig_5243	1
s_1_1_contig221255	s_1_1NewScaffoldedcontig_5243	5989
s_1_1_contig25032	s_1_1NewScaffoldedcontig_5243	27525
s_1_1_contig188450	s_1_1NewScaffoldedcontig_5245	1
s_1_1_contig280408	s_1_1NewScaffoldedcontig_5245	4907
s_1_1_contig72657	s_1_1NewScaffoldedcontig_5258	16002
s_1_1_contig239875	s_1_1NewScaffoldedcontig_5264	30609
s_1_1_contig34033	s_1_1NewScaffoldedcontig_5267	43829
s_1_1_contig150442	s_1_1NewScaffoldedcontig_5271	1
s_1_1_contig197413	s_1_1NewScaffoldedcontig_5276	30274
s_1_1_contig210146	s_1_1NewScaffoldedcontig_5278	43940
s_1_1_contig136622	s_1_1NewScaffoldedcontig_5278	44124
s_1_1_contig13950	s_1_1NewScaffoldedcontig_5283	1
s_1_1_contig115795	s_1_1NewScaffoldedcontig_5290	3470
s_1_1_contig181764	s_1_1NewScaffoldedcontig_5292	27
s_1_1_contig264973	s_1_1NewScaffoldedcontig_5294	1
s_1_1_contig198505	s_1_1NewScaffoldedcontig_5295	1530
s_1_1_contig78407	s_1_1NewScaffoldedcontig_5299	1
s_1_1_contig170700	s_1_1NewScaffoldedcontig_5301	2121
s_1_1_contig187557	s_1_1NewScaffoldedcontig_5301	8944
s_1_1_contig280679	s_1_1NewScaffoldedcontig_5301	9040
s_1_1_contig280083	s_1_1NewScaffoldedcontig_5301	9056
s_1_1_contig255003	s_1_1NewScaffoldedcontig_5301	9063
s_1_1_contig208410	s_1_1NewScaffoldedcontig_5301	9084
s_1_1_contig211529	s_1_1NewScaffoldedcontig_5301	9126
s_1_1_contig251591	s_1_1NewScaffoldedcontig_5301	9154
s_1_1_contig213947	s_1_1NewScaffoldedcontig_5301	9197
s_1_1_contig143936	s_1_1NewScaffoldedcontig_5302	6434
s_1_1_contig64661	s_1_1NewScaffoldedcontig_5313	5841
s_1_1_contig238952	s_1_1NewScaffoldedcontig_5315	20577
s_1_1_contig207469	s_1_1NewScaffoldedcontig_5315	20577
s_1_1_contig256359	s_1_1NewScaffoldedcontig_5315	20583
s_1_1_contig156509	s_1_1NewScaffoldedcontig_5317	3130
s_1_1_contig89317	s_1_1NewScaffoldedcontig_5318	4998
s_1_1_contig276867	s_1_1NewScaffoldedcontig_5326	1
s_1_1_contig135018	s_1_1NewScaffoldedcontig_5337	15807
s_1_1_contig200664	s_1_1NewScaffoldedcontig_5337	20784
s_1_1_contig192340	s_1_1NewScaffoldedcontig_5339	560
s_1_1_contig187056	s_1_1NewScaffoldedcontig_5339	41967
s_1_1_contig213766	s_1_1NewScaffoldedcontig_5339	71709
s_1_1_contig248021	s_1_1NewScaffoldedcontig_5342	2006
s_1_1_contig100113	s_1_1NewScaffoldedcontig_5349	44794
s_1_1_contig259171	s_1_1NewScaffoldedcontig_5350	1644
s_1_1_contig131775	s_1_1NewScaffoldedcontig_5356	28376
s_1_1_contig170975	s_1_1NewScaffoldedcontig_5365	270
s_1_1_contig254259	s_1_1NewScaffoldedcontig_5366	493
s_1_1_contig262124	s_1_1NewScaffoldedcontig_5367	7250
s_1_1_contig153098	s_1_1NewScaffoldedcontig_5370	8172
s_1_1_contig184397	s_1_1NewScaffoldedcontig_5371	3536
s_1_1_contig282718	s_1_1NewScaffoldedcontig_5375	7866
s_1_1_contig262193	s_1_1NewScaffoldedcontig_5386	1044
s_1_1_contig188545	s_1_1NewScaffoldedcontig_5387	4835
s_1_1_contig162857	s_1_1NewScaffoldedcontig_5402	6978
s_1_1_contig200334	s_1_1NewScaffoldedcontig_5412	6903
s_1_1_contig159850	s_1_1NewScaffoldedcontig_5417	1
s_1_1_contig282676	s_1_1NewScaffoldedcontig_5440	24845
s_1_1_contig255192	s_1_1NewScaffoldedcontig_5440	24945
s_1_1_contig241332	s_1_1NewScaffoldedcontig_5442	9819
s_1_1_contig281375	s_1_1NewScaffoldedcontig_5449	672
s_1_1_contig164896	s_1_1NewScaffoldedcontig_5470	47268
s_1_1_contig210702	s_1_1NewScaffoldedcontig_5471	1
s_1_1_contig245307	s_1_1NewScaffoldedcontig_5472	1
s_1_1_contig258176	s_1_1NewScaffoldedcontig_5478	25689
s_1_1_contig211458	s_1_1NewScaffoldedcontig_5497	4261
s_1_1_contig81035	s_1_1NewScaffoldedcontig_5498	1
s_1_1_contig240881	s_1_1NewScaffoldedcontig_5514	1
s_1_1_contig107635	s_1_1NewScaffoldedcontig_5520	13921
s_1_1_contig93028	s_1_1NewScaffoldedcontig_5528	1
s_1_1_contig196603	s_1_1NewScaffoldedcontig_5537	15715
s_1_1_contig51572	s_1_1NewScaffoldedcontig_5538	44486
s_1_1_contig274681	s_1_1NewScaffoldedcontig_5539	3067
s_1_1_contig191760	s_1_1NewScaffoldedcontig_5539	11594
s_1_1_contig90430	s_1_1NewScaffoldedcontig_5547	5322
s_1_1_contig22078	s_1_1NewScaffoldedcontig_5565	1325
s_1_1_contig259105	s_1_1NewScaffoldedcontig_5572	5367
s_1_1_contig174388	s_1_1NewScaffoldedcontig_5578	16974
s_1_1_contig118411	s_1_1NewScaffoldedcontig_5592	24951
s_1_1_contig245207	s_1_1NewScaffoldedcontig_5592	29804
s_1_1_contig282915	s_1_1NewScaffoldedcontig_5615	99
s_1_1_contig275180	s_1_1NewScaffoldedcontig_5617	19483
s_1_1_contig257151	s_1_1NewScaffoldedcontig_5626	133
s_1_1_contig190650	s_1_1NewScaffoldedcontig_5648	43
s_1_1_contig259387	s_1_1NewScaffoldedcontig_5648	499
s_1_1_contig194763	s_1_1NewScaffoldedcontig_5648	6731
s_1_1_contig170380	s_1_1NewScaffoldedcontig_5650	1
s_1_1_contig197849	s_1_1NewScaffoldedcontig_5658	15312
s_1_1_contig126592	s_1_1NewScaffoldedcontig_5663	15267
s_1_1_contig42972	s_1_1NewScaffoldedcontig_5674	4555
s_1_1_contig99487	s_1_1NewScaffoldedcontig_5679	4985
s_1_1_contig256022	s_1_1NewScaffoldedcontig_5683	1454
s_1_1_contig255444	s_1_1NewScaffoldedcontig_5684	493
s_1_1_contig259020	s_1_1NewScaffoldedcontig_5705	1846
s_1_1_contig279650	s_1_1NewScaffoldedcontig_5716	4682
s_1_1_contig129296	s_1_1NewScaffoldedcontig_5718	98
s_1_1_contig66522	s_1_1NewScaffoldedcontig_5728	38748
s_1_1_contig241771	s_1_1NewScaffoldedcontig_5746	23101
s_1_1_contig41505	s_1_1NewScaffoldedcontig_5746	63365
s_1_1_contig247490	s_1_1NewScaffoldedcontig_5746	65597
s_1_1_contig195700	s_1_1NewScaffoldedcontig_5750	1
s_1_1_contig201492	s_1_1NewScaffoldedcontig_5750	21441
s_1_1_contig131379	s_1_1NewScaffoldedcontig_5756	5535
s_1_1_contig44463	s_1_1NewScaffoldedcontig_5762	20085
s_1_1_contig243602	s_1_1NewScaffoldedcontig_5767	2483
s_1_1_contig76646	s_1_1NewScaffoldedcontig_5779	1474
s_1_1_contig211137	s_1_1NewScaffoldedcontig_5781	19843
s_1_1_contig151410	s_1_1NewScaffoldedcontig_5781	19843
s_1_1_contig251098	s_1_1NewScaffoldedcontig_5781	19852
s_1_1_contig187681	s_1_1NewScaffoldedcontig_5781	19853
s_1_1_contig190666	s_1_1NewScaffoldedcontig_5784	1
s_1_1_contig183062	s_1_1NewScaffoldedcontig_5784	7092
s_1_1_contig233782	s_1_1NewScaffoldedcontig_5789	13885
s_1_1_contig34024	s_1_1NewScaffoldedcontig_5789	25416
s_1_1_contig233392	s_1_1NewScaffoldedcontig_5790	9729
s_1_1_contig230842	s_1_1NewScaffoldedcontig_5792	500
s_1_1_contig170982	s_1_1NewScaffoldedcontig_5809	1
s_1_1_contig258236	s_1_1NewScaffoldedcontig_5809	397
s_1_1_contig55929	s_1_1NewScaffoldedcontig_5813	65
s_1_1_contig124106	s_1_1NewScaffoldedcontig_5829	954
s_1_1_contig140686	s_1_1NewScaffoldedcontig_5839	28511
s_1_1_contig202985	s_1_1NewScaffoldedcontig_5840	14188
s_1_1_contig93616	s_1_1NewScaffoldedcontig_5844	1357
s_1_1_contig245689	s_1_1NewScaffoldedcontig_5847	21175
s_1_1_contig153859	s_1_1NewScaffoldedcontig_5850	1619
s_1_1_contig250018	s_1_1NewScaffoldedcontig_5864	22041
s_1_1_contig128226	s_1_1NewScaffoldedcontig_5872	51269
s_1_1_contig32865	s_1_1NewScaffoldedcontig_5883	19693
s_1_1_contig112151	s_1_1NewScaffoldedcontig_5885	1217
s_1_1_contig196914	s_1_1NewScaffoldedcontig_5887	9476
s_1_1_contig255825	s_1_1NewScaffoldedcontig_5892	8672
s_1_1_contig249682	s_1_1NewScaffoldedcontig_5892	9123
s_1_1_contig187746	s_1_1NewScaffoldedcontig_5892	9130
s_1_1_contig135394	s_1_1NewScaffoldedcontig_5905	1
s_1_1_contig164759	s_1_1NewScaffoldedcontig_5918	13726
s_1_1_contig199126	s_1_1NewScaffoldedcontig_5918	15815
s_1_1_contig191043	s_1_1NewScaffoldedcontig_5919	4929
s_1_1_contig38491	s_1_1NewScaffoldedcontig_5934	315
s_1_1_contig268451	s_1_1NewScaffoldedcontig_5937	1540
s_1_1_contig112118	s_1_1NewScaffoldedcontig_5941	1368
s_1_1_contig97916	s_1_1NewScaffoldedcontig_5944	10946
s_1_1_contig262059	s_1_1NewScaffoldedcontig_5951	5618
s_1_1_contig257248	s_1_1NewScaffoldedcontig_5961	7176
s_1_1_contig120791	s_1_1NewScaffoldedcontig_5966	11697
s_1_1_contig194078	s_1_1NewScaffoldedcontig_5974	3981
s_1_1_contig235487	s_1_1NewScaffoldedcontig_5987	3466
s_1_1_contig149090	s_1_1NewScaffoldedcontig_6007	4114
s_1_1_contig19064	s_1_1NewScaffoldedcontig_6011	1
s_1_1_contig229479	s_1_1NewScaffoldedcontig_6013	21168
s_1_1_contig242104	s_1_1NewScaffoldedcontig_6019	1
s_1_1_contig233115	s_1_1NewScaffoldedcontig_6033	1
s_1_1_contig132493	s_1_1NewScaffoldedcontig_6040	18135
s_1_1_contig205444	s_1_1NewScaffoldedcontig_6045	1
s_1_1_contig172052	s_1_1NewScaffoldedcontig_6054	8349
s_1_1_contig239799	s_1_1NewScaffoldedcontig_6063	838
s_1_1_contig248253	s_1_1NewScaffoldedcontig_6065	4906
s_1_1_contig29761	s_1_1NewScaffoldedcontig_6066	35856
s_1_1_contig275012	s_1_1NewScaffoldedcontig_6071	35
s_1_1_contig248792	s_1_1NewScaffoldedcontig_6075	9196
s_1_1_contig203044	s_1_1NewScaffoldedcontig_6078	20954
s_1_1_contig232526	s_1_1NewScaffoldedcontig_6080	1
s_1_1_contig170627	s_1_1NewScaffoldedcontig_6084	11787
s_1_1_contig135067	s_1_1NewScaffoldedcontig_6092	1
s_1_1_contig199071	s_1_1NewScaffoldedcontig_6092	9632
s_1_1_contig188695	s_1_1NewScaffoldedcontig_6092	75908
s_1_1_contig44196	s_1_1NewScaffoldedcontig_6120	55254
s_1_1_contig203159	s_1_1NewScaffoldedcontig_6123	5050
s_1_1_contig255497	s_1_1NewScaffoldedcontig_6132	13681
s_1_1_contig251990	s_1_1NewScaffoldedcontig_6135	2012
s_1_1_contig125285	s_1_1NewScaffoldedcontig_6143	209
s_1_1_contig182932	s_1_1NewScaffoldedcontig_6148	4556
s_1_1_contig255562	s_1_1NewScaffoldedcontig_6166	7162
s_1_1_contig244485	s_1_1NewScaffoldedcontig_6167	21905
s_1_1_contig35341	s_1_1NewScaffoldedcontig_6173	10095
s_1_1_contig60293	s_1_1NewScaffoldedcontig_6181	4718
s_1_1_contig217770	s_1_1NewScaffoldedcontig_6182	3977
s_1_1_contig13174	s_1_1NewScaffoldedcontig_6184	7664
s_1_1_contig254065	s_1_1NewScaffoldedcontig_6196	2185
s_1_1_contig210452	s_1_1NewScaffoldedcontig_6206	11795
s_1_1_contig276425	s_1_1NewScaffoldedcontig_6208	1
s_1_1_contig153630	s_1_1NewScaffoldedcontig_6208	3164
s_1_1_contig110310	s_1_1NewScaffoldedcontig_6212	33056
s_1_1_contig207521	s_1_1NewScaffoldedcontig_6214	1117
s_1_1_contig26155	s_1_1NewScaffoldedcontig_6214	11506
s_1_1_contig257911	s_1_1NewScaffoldedcontig_6221	4759
s_1_1_contig191859	s_1_1NewScaffoldedcontig_6243	4110
s_1_1_contig250560	s_1_1NewScaffoldedcontig_6244	1
s_1_1_contig127649	s_1_1NewScaffoldedcontig_6250	2180
s_1_1_contig244930	s_1_1NewScaffoldedcontig_6253	9967
s_1_1_contig108097	s_1_1NewScaffoldedcontig_6263	296
s_1_1_contig174279	s_1_1NewScaffoldedcontig_6264	1
s_1_1_contig211635	s_1_1NewScaffoldedcontig_6266	4634
s_1_1_contig202358	s_1_1NewScaffoldedcontig_6269	10772
s_1_1_contig255958	s_1_1NewScaffoldedcontig_6274	4066
s_1_1_contig207420	s_1_1NewScaffoldedcontig_6274	4693
s_1_1_contig213294	s_1_1NewScaffoldedcontig_6281	4173
s_1_1_contig173236	s_1_1NewScaffoldedcontig_6288	3795
s_1_1_contig38541	s_1_1NewScaffoldedcontig_6288	13081
s_1_1_contig188627	s_1_1NewScaffoldedcontig_6294	12283
s_1_1_contig201934	s_1_1NewScaffoldedcontig_6303	4
s_1_1_contig15258	s_1_1NewScaffoldedcontig_6305	24634
s_1_1_contig68898	s_1_1NewScaffoldedcontig_6308	1
s_1_1_contig141333	s_1_1NewScaffoldedcontig_6314	6427
s_1_1_contig59516	s_1_1NewScaffoldedcontig_6318	1
s_1_1_contig147024	s_1_1NewScaffoldedcontig_6327	1
s_1_1_contig141473	s_1_1NewScaffoldedcontig_6327	3544
s_1_1_contig48997	s_1_1NewScaffoldedcontig_6347	8870
s_1_1_contig84878	s_1_1NewScaffoldedcontig_6352	18835
s_1_1_contig162626	s_1_1NewScaffoldedcontig_6355	3525
s_1_1_contig112082	s_1_1NewScaffoldedcontig_6361	10682
s_1_1_contig210831	s_1_1NewScaffoldedcontig_6365	14979
s_1_1_contig212276	s_1_1NewScaffoldedcontig_6368	278
s_1_1_contig252664	s_1_1NewScaffoldedcontig_6370	680
s_1_1_contig92627	s_1_1NewScaffoldedcontig_6373	1
s_1_1_contig225817	s_1_1NewScaffoldedcontig_6377	4811
s_1_1_contig241736	s_1_1NewScaffoldedcontig_6399	6
s_1_1_contig26836	s_1_1NewScaffoldedcontig_6401	11913
s_1_1_contig272211	s_1_1NewScaffoldedcontig_6414	5068
s_1_1_contig233551	s_1_1NewScaffoldedcontig_6419	36023
s_1_1_contig207816	s_1_1NewScaffoldedcontig_6419	39202
s_1_1_contig248579	s_1_1NewScaffoldedcontig_6419	39202
s_1_1_contig166986	s_1_1NewScaffoldedcontig_6423	17958
s_1_1_contig217710	s_1_1NewScaffoldedcontig_6429	1577
s_1_1_contig96713	s_1_1NewScaffoldedcontig_6429	6630
s_1_1_contig241469	s_1_1NewScaffoldedcontig_6453	1
s_1_1_contig174699	s_1_1NewScaffoldedcontig_6456	24442
s_1_1_contig201321	s_1_1NewScaffoldedcontig_6458	8527
s_1_1_contig139265	s_1_1NewScaffoldedcontig_6458	23602
s_1_1_contig208464	s_1_1NewScaffoldedcontig_6463	2644
s_1_1_contig257557	s_1_1NewScaffoldedcontig_6471	9940
s_1_1_contig187635	s_1_1NewScaffoldedcontig_6496	34440
s_1_1_contig250300	s_1_1NewScaffoldedcontig_6506	10707
s_1_1_contig259002	s_1_1NewScaffoldedcontig_6521	947
s_1_1_contig119956	s_1_1NewScaffoldedcontig_6522	13814
s_1_1_contig277452	s_1_1NewScaffoldedcontig_6526	78
s_1_1_contig145040	s_1_1NewScaffoldedcontig_6538	1582
s_1_1_contig234460	s_1_1NewScaffoldedcontig_6544	7855
s_1_1_contig194333	s_1_1NewScaffoldedcontig_6550	22583
s_1_1_contig187300	s_1_1NewScaffoldedcontig_6552	11611
s_1_1_contig123579	s_1_1NewScaffoldedcontig_6559	5008
s_1_1_contig76144	s_1_1NewScaffoldedcontig_6573	1
s_1_1_contig157824	s_1_1NewScaffoldedcontig_6580	26
s_1_1_contig201964	s_1_1NewScaffoldedcontig_6580	2023
s_1_1_contig212778	s_1_1NewScaffoldedcontig_6585	27
s_1_1_contig101372	s_1_1NewScaffoldedcontig_6597	13524
s_1_1_contig184083	s_1_1NewScaffoldedcontig_6597	24640
s_1_1_contig236127	s_1_1NewScaffoldedcontig_6597	26436
s_1_1_contig116063	s_1_1NewScaffoldedcontig_6601	9219
s_1_1_contig241067	s_1_1NewScaffoldedcontig_6603	14016
s_1_1_contig252437	s_1_1NewScaffoldedcontig_6606	3684
s_1_1_contig14338	s_1_1NewScaffoldedcontig_6607	1
s_1_1_contig258971	s_1_1NewScaffoldedcontig_6617	8462
s_1_1_contig244252	s_1_1NewScaffoldedcontig_6622	1013
s_1_1_contig281904	s_1_1NewScaffoldedcontig_6622	1333
s_1_1_contig37308	s_1_1NewScaffoldedcontig_6628	50043
s_1_1_contig255876	s_1_1NewScaffoldedcontig_6629	1
s_1_1_contig265428	s_1_1NewScaffoldedcontig_6636	15622
s_1_1_contig245098	s_1_1NewScaffoldedcontig_6639	14012
s_1_1_contig155265	s_1_1NewScaffoldedcontig_6643	1
s_1_1_contig209125	s_1_1NewScaffoldedcontig_6647	1
s_1_1_contig188471	s_1_1NewScaffoldedcontig_6652	1863
s_1_1_contig276765	s_1_1NewScaffoldedcontig_6652	6687
s_1_1_contig154189	s_1_1NewScaffoldedcontig_6654	1818
s_1_1_contig272372	s_1_1NewScaffoldedcontig_6675	16820
s_1_1_contig217703	s_1_1NewScaffoldedcontig_6675	18705
s_1_1_contig159556	s_1_1NewScaffoldedcontig_6682	1
s_1_1_contig247915	s_1_1NewScaffoldedcontig_6683	15339
s_1_1_contig89470	s_1_1NewScaffoldedcontig_6709	19929
s_1_1_contig225677	s_1_1NewScaffoldedcontig_6733	302
s_1_1_contig196627	s_1_1NewScaffoldedcontig_6740	1
s_1_1_contig153511	s_1_1NewScaffoldedcontig_6751	272
s_1_1_contig250749	s_1_1NewScaffoldedcontig_6755	7662
s_1_1_contig242679	s_1_1NewScaffoldedcontig_6755	29762
s_1_1_contig268425	s_1_1NewScaffoldedcontig_6755	30025
s_1_1_contig14913	s_1_1NewScaffoldedcontig_6761	6549
s_1_1_contig244144	s_1_1NewScaffoldedcontig_6766	38583
s_1_1_contig190417	s_1_1NewScaffoldedcontig_6773	29
s_1_1_contig102217	s_1_1NewScaffoldedcontig_6779	640
s_1_1_contig247631	s_1_1NewScaffoldedcontig_6784	1
s_1_1_contig187059	s_1_1NewScaffoldedcontig_6794	2495
s_1_1_contig4075	s_1_1NewScaffoldedcontig_6803	13992
s_1_1_contig248009	s_1_1NewScaffoldedcontig_6807	8181
s_1_1_contig253481	s_1_1NewScaffoldedcontig_6831	5406
s_1_1_contig211615	s_1_1NewScaffoldedcontig_6831	5406
s_1_1_contig211361	s_1_1NewScaffoldedcontig_6831	5411
s_1_1_contig271427	s_1_1NewScaffoldedcontig_6838	1
s_1_1_contig187165	s_1_1NewScaffoldedcontig_6839	2021
s_1_1_contig109398	s_1_1NewScaffoldedcontig_6841	1
s_1_1_contig196599	s_1_1NewScaffoldedcontig_6847	6397
s_1_1_contig126561	s_1_1NewScaffoldedcontig_6848	33
s_1_1_contig149448	s_1_1NewScaffoldedcontig_6852	1
s_1_1_contig177493	s_1_1NewScaffoldedcontig_6858	21192
s_1_1_contig108958	s_1_1NewScaffoldedcontig_6859	33515
s_1_1_contig279050	s_1_1NewScaffoldedcontig_6874	1853
s_1_1_contig236192	s_1_1NewScaffoldedcontig_6886	22976
s_1_1_contig276757	s_1_1NewScaffoldedcontig_6894	1
s_1_1_contig254202	s_1_1NewScaffoldedcontig_6898	2
s_1_1_contig94973	s_1_1NewScaffoldedcontig_6917	4828
s_1_1_contig123251	s_1_1NewScaffoldedcontig_6925	34094
s_1_1_contig269067	s_1_1NewScaffoldedcontig_6932	9341
s_1_1_contig246598	s_1_1NewScaffoldedcontig_6936	30879
s_1_1_contig174221	s_1_1NewScaffoldedcontig_6941	257
s_1_1_contig101942	s_1_1NewScaffoldedcontig_6942	26729
s_1_1_contig188490	s_1_1NewScaffoldedcontig_6942	50780
s_1_1_contig253061	s_1_1NewScaffoldedcontig_6942	51656
s_1_1_contig239960	s_1_1NewScaffoldedcontig_6942	58095
s_1_1_contig185876	s_1_1NewScaffoldedcontig_6945	315
s_1_1_contig58095	s_1_1NewScaffoldedcontig_6958	39412
s_1_1_contig237320	s_1_1NewScaffoldedcontig_6963	1926
s_1_1_contig116668	s_1_1NewScaffoldedcontig_6967	1
s_1_1_contig135164	s_1_1NewScaffoldedcontig_6968	14353
s_1_1_contig165380	s_1_1NewScaffoldedcontig_6990	17810
s_1_1_contig240818	s_1_1NewScaffoldedcontig_6999	2583
s_1_1_contig146465	s_1_1NewScaffoldedcontig_7007	1
s_1_1_contig154779	s_1_1NewScaffoldedcontig_7012	1194
s_1_1_contig35089	s_1_1NewScaffoldedcontig_7027	9876
s_1_1_contig150620	s_1_1NewScaffoldedcontig_7032	7144
s_1_1_contig238820	s_1_1NewScaffoldedcontig_7036	1
s_1_1_contig59235	s_1_1NewScaffoldedcontig_7045	7082
s_1_1_contig140092	s_1_1NewScaffoldedcontig_7051	4452
s_1_1_contig148410	s_1_1NewScaffoldedcontig_7051	11725
s_1_1_contig97972	s_1_1NewScaffoldedcontig_7055	9142
s_1_1_contig210351	s_1_1NewScaffoldedcontig_7069	1
s_1_1_contig156487	s_1_1NewScaffoldedcontig_7071	1
s_1_1_contig237420	s_1_1NewScaffoldedcontig_7075	2920
s_1_1_contig187773	s_1_1NewScaffoldedcontig_7087	5901
s_1_1_contig80585	s_1_1NewScaffoldedcontig_7093	10
s_1_1_contig208806	s_1_1NewScaffoldedcontig_7095	1
s_1_1_contig233285	s_1_1NewScaffoldedcontig_7097	5378
s_1_1_contig93666	s_1_1NewScaffoldedcontig_7098	1
s_1_1_contig110374	s_1_1NewScaffoldedcontig_7100	1
s_1_1_contig185163	s_1_1NewScaffoldedcontig_7110	6160
s_1_1_contig38216	s_1_1NewScaffoldedcontig_7120	20780
s_1_1_contig239542	s_1_1NewScaffoldedcontig_7121	250
s_1_1_contig236380	s_1_1NewScaffoldedcontig_7123	4493
s_1_1_contig212062	s_1_1NewScaffoldedcontig_7123	4493
s_1_1_contig125740	s_1_1NewScaffoldedcontig_7124	1
s_1_1_contig254498	s_1_1NewScaffoldedcontig_7130	8336
s_1_1_contig62973	s_1_1NewScaffoldedcontig_7130	26256
s_1_1_contig46803	s_1_1NewScaffoldedcontig_7139	8688
s_1_1_contig248370	s_1_1NewScaffoldedcontig_7144	4722
s_1_1_contig253194	s_1_1NewScaffoldedcontig_7145	1
s_1_1_contig177083	s_1_1NewScaffoldedcontig_7147	957
s_1_1_contig131719	s_1_1NewScaffoldedcontig_7156	1240
s_1_1_contig115927	s_1_1NewScaffoldedcontig_7164	5572
s_1_1_contig121168	s_1_1NewScaffoldedcontig_7165	34319
s_1_1_contig211357	s_1_1NewScaffoldedcontig_7178	3586
s_1_1_contig207840	s_1_1NewScaffoldedcontig_7179	25567
s_1_1_contig254748	s_1_1NewScaffoldedcontig_7180	1
s_1_1_contig163167	s_1_1NewScaffoldedcontig_7183	7224
s_1_1_contig65353	s_1_1NewScaffoldedcontig_7189	12632
s_1_1_contig38033	s_1_1NewScaffoldedcontig_7189	15259
s_1_1_contig272701	s_1_1NewScaffoldedcontig_7200	34208
s_1_1_contig113296	s_1_1NewScaffoldedcontig_7204	27272
s_1_1_contig214905	s_1_1NewScaffoldedcontig_7207	3635
s_1_1_contig254470	s_1_1NewScaffoldedcontig_7207	6165
s_1_1_contig279449	s_1_1NewScaffoldedcontig_7207	6172
s_1_1_contig269254	s_1_1NewScaffoldedcontig_7216	1
s_1_1_contig167880	s_1_1NewScaffoldedcontig_7218	4713
s_1_1_contig38109	s_1_1NewScaffoldedcontig_7222	19606
s_1_1_contig23891	s_1_1NewScaffoldedcontig_7240	8802
s_1_1_contig240892	s_1_1NewScaffoldedcontig_7240	13191
s_1_1_contig32177	s_1_1NewScaffoldedcontig_7248	29443
s_1_1_contig211934	s_1_1NewScaffoldedcontig_7257	838
s_1_1_contig206542	s_1_1NewScaffoldedcontig_7257	838
s_1_1_contig211328	s_1_1NewScaffoldedcontig_7257	875
s_1_1_contig233296	s_1_1NewScaffoldedcontig_7257	20076
s_1_1_contig137582	s_1_1NewScaffoldedcontig_7271	1
s_1_1_contig261117	s_1_1NewScaffoldedcontig_7280	12304
s_1_1_contig68719	s_1_1NewScaffoldedcontig_7285	1
s_1_1_contig215999	s_1_1NewScaffoldedcontig_7289	1
s_1_1_contig34413	s_1_1NewScaffoldedcontig_7294	1
s_1_1_contig256345	s_1_1NewScaffoldedcontig_7298	45605
s_1_1_contig234669	s_1_1NewScaffoldedcontig_7298	46572
s_1_1_contig165768	s_1_1NewScaffoldedcontig_7303	9224
s_1_1_contig146109	s_1_1NewScaffoldedcontig_7313	1641
s_1_1_contig113185	s_1_1NewScaffoldedcontig_7313	9370
s_1_1_contig28730	s_1_1NewScaffoldedcontig_7314	19227
s_1_1_contig252019	s_1_1NewScaffoldedcontig_7315	4633
s_1_1_contig248297	s_1_1NewScaffoldedcontig_7315	13164
s_1_1_contig201721	s_1_1NewScaffoldedcontig_7319	3178
s_1_1_contig255226	s_1_1NewScaffoldedcontig_7322	96
s_1_1_contig242825	s_1_1NewScaffoldedcontig_7331	245
s_1_1_contig34689	s_1_1NewScaffoldedcontig_7331	23032
s_1_1_contig129413	s_1_1NewScaffoldedcontig_7339	10420
s_1_1_contig39737	s_1_1NewScaffoldedcontig_7344	1
s_1_1_contig209075	s_1_1NewScaffoldedcontig_7344	32068
s_1_1_contig243933	s_1_1NewScaffoldedcontig_7349	3370
s_1_1_contig198062	s_1_1NewScaffoldedcontig_7354	1
s_1_1_contig189127	s_1_1NewScaffoldedcontig_7356	27292
s_1_1_contig178860	s_1_1NewScaffoldedcontig_7366	21602
s_1_1_contig280568	s_1_1NewScaffoldedcontig_7372	1
s_1_1_contig13410	s_1_1NewScaffoldedcontig_7387	3116
s_1_1_contig240815	s_1_1NewScaffoldedcontig_7389	1
s_1_1_contig3682	s_1_1NewScaffoldedcontig_7392	2742
s_1_1_contig273779	s_1_1NewScaffoldedcontig_7396	13356
s_1_1_contig274575	s_1_1NewScaffoldedcontig_7399	2150
s_1_1_contig237704	s_1_1NewScaffoldedcontig_7403	12905
s_1_1_contig24321	s_1_1NewScaffoldedcontig_7403	34849
s_1_1_contig187143	s_1_1NewScaffoldedcontig_7404	19253
s_1_1_contig185143	s_1_1NewScaffoldedcontig_7404	35361
s_1_1_contig188362	s_1_1NewScaffoldedcontig_7408	1
s_1_1_contig110920	s_1_1NewScaffoldedcontig_7408	23849
s_1_1_contig65711	s_1_1NewScaffoldedcontig_7408	56741
s_1_1_contig10293	s_1_1NewScaffoldedcontig_7428	18668
s_1_1_contig197438	s_1_1NewScaffoldedcontig_7436	38129
s_1_1_contig188360	s_1_1NewScaffoldedcontig_7439	4853
s_1_1_contig226455	s_1_1NewScaffoldedcontig_7449	1
s_1_1_contig172377	s_1_1NewScaffoldedcontig_7450	1
s_1_1_contig211554	s_1_1NewScaffoldedcontig_7450	4163
s_1_1_contig240079	s_1_1NewScaffoldedcontig_7460	6005
s_1_1_contig259028	s_1_1NewScaffoldedcontig_7461	4259
s_1_1_contig184692	s_1_1NewScaffoldedcontig_7467	1
s_1_1_contig245433	s_1_1NewScaffoldedcontig_7475	1
s_1_1_contig281654	s_1_1NewScaffoldedcontig_7489	91
s_1_1_contig212047	s_1_1NewScaffoldedcontig_7489	116
s_1_1_contig281332	s_1_1NewScaffoldedcontig_7490	39416
s_1_1_contig249787	s_1_1NewScaffoldedcontig_7500	5864
s_1_1_contig212036	s_1_1NewScaffoldedcontig_7514	199
s_1_1_contig257846	s_1_1NewScaffoldedcontig_7522	49859
s_1_1_contig126447	s_1_1NewScaffoldedcontig_7524	1
s_1_1_contig73593	s_1_1NewScaffoldedcontig_7525	19238
s_1_1_contig281426	s_1_1NewScaffoldedcontig_7530	905
s_1_1_contig210982	s_1_1NewScaffoldedcontig_7559	1
s_1_1_contig246060	s_1_1NewScaffoldedcontig_7565	4198
s_1_1_contig189814	s_1_1NewScaffoldedcontig_7565	72175
s_1_1_contig266173	s_1_1NewScaffoldedcontig_7572	4115
s_1_1_contig146359	s_1_1NewScaffoldedcontig_7578	1
s_1_1_contig196901	s_1_1NewScaffoldedcontig_7581	11323
s_1_1_contig196956	s_1_1NewScaffoldedcontig_7581	11622
s_1_1_contig42078	s_1_1NewScaffoldedcontig_7593	4212
s_1_1_contig232907	s_1_1NewScaffoldedcontig_7593	18473
s_1_1_contig42645	s_1_1NewScaffoldedcontig_7599	35567
s_1_1_contig176256	s_1_1NewScaffoldedcontig_7608	20335
s_1_1_contig60652	s_1_1NewScaffoldedcontig_7610	42932
s_1_1_contig274266	s_1_1NewScaffoldedcontig_7620	1
s_1_1_contig246335	s_1_1NewScaffoldedcontig_7635	1
s_1_1_contig253956	s_1_1NewScaffoldedcontig_7636	1
s_1_1_contig256883	s_1_1NewScaffoldedcontig_7639	14849
s_1_1_contig255812	s_1_1NewScaffoldedcontig_7639	26118
s_1_1_contig187843	s_1_1NewScaffoldedcontig_7642	1
s_1_1_contig38428	s_1_1NewScaffoldedcontig_7647	13148
s_1_1_contig267866	s_1_1NewScaffoldedcontig_7650	26265
s_1_1_contig184392	s_1_1NewScaffoldedcontig_7655	1970
s_1_1_contig250204	s_1_1NewScaffoldedcontig_7660	1
s_1_1_contig39366	s_1_1NewScaffoldedcontig_7660	428
s_1_1_contig265745	s_1_1NewScaffoldedcontig_7662	2223
s_1_1_contig104247	s_1_1NewScaffoldedcontig_7673	20067
s_1_1_contig171416	s_1_1NewScaffoldedcontig_7680	12199
s_1_1_contig190377	s_1_1NewScaffoldedcontig_7686	11504
s_1_1_contig229754	s_1_1NewScaffoldedcontig_7696	58278
s_1_1_contig251833	s_1_1NewScaffoldedcontig_7696	65905
s_1_1_contig213799	s_1_1NewScaffoldedcontig_7698	7290
s_1_1_contig43079	s_1_1NewScaffoldedcontig_7723	3747
s_1_1_contig31730	s_1_1NewScaffoldedcontig_7734	12949
s_1_1_contig95996	s_1_1NewScaffoldedcontig_7734	32664
s_1_1_contig229682	s_1_1NewScaffoldedcontig_7738	1
s_1_1_contig277047	s_1_1NewScaffoldedcontig_7740	1838
s_1_1_contig222964	s_1_1NewScaffoldedcontig_7740	8358
s_1_1_contig258323	s_1_1NewScaffoldedcontig_7743	25944
s_1_1_contig211567	s_1_1NewScaffoldedcontig_7743	26168
s_1_1_contig143984	s_1_1NewScaffoldedcontig_7745	34420
s_1_1_contig154202	s_1_1NewScaffoldedcontig_7749	1054
s_1_1_contig248314	s_1_1NewScaffoldedcontig_7750	599
s_1_1_contig249678	s_1_1NewScaffoldedcontig_7756	18448
s_1_1_contig194535	s_1_1NewScaffoldedcontig_7758	16410
s_1_1_contig255992	s_1_1NewScaffoldedcontig_7762	3406
s_1_1_contig214797	s_1_1NewScaffoldedcontig_7768	15012
s_1_1_contig211947	s_1_1NewScaffoldedcontig_7768	15155
s_1_1_contig255902	s_1_1NewScaffoldedcontig_7782	11386
s_1_1_contig43507	s_1_1NewScaffoldedcontig_7787	18414
s_1_1_contig209906	s_1_1NewScaffoldedcontig_7797	52506
s_1_1_contig112504	s_1_1NewScaffoldedcontig_7801	487
s_1_1_contig278874	s_1_1NewScaffoldedcontig_7810	4252
s_1_1_contig241158	s_1_1NewScaffoldedcontig_7810	9842
s_1_1_contig137781	s_1_1NewScaffoldedcontig_7834	9968
s_1_1_contig250567	s_1_1NewScaffoldedcontig_7838	10378
s_1_1_contig216321	s_1_1NewScaffoldedcontig_7840	2704
s_1_1_contig221804	s_1_1NewScaffoldedcontig_7840	8880
s_1_1_contig258845	s_1_1NewScaffoldedcontig_7842	11111
s_1_1_contig61244	s_1_1NewScaffoldedcontig_7844	12279
s_1_1_contig276751	s_1_1NewScaffoldedcontig_7848	4451
s_1_1_contig44341	s_1_1NewScaffoldedcontig_7860	22008
s_1_1_contig268757	s_1_1NewScaffoldedcontig_7868	15886
s_1_1_contig123200	s_1_1NewScaffoldedcontig_7869	1
s_1_1_contig170948	s_1_1NewScaffoldedcontig_7870	10314
s_1_1_contig182832	s_1_1NewScaffoldedcontig_7870	10330
s_1_1_contig170983	s_1_1NewScaffoldedcontig_7870	10424
s_1_1_contig252979	s_1_1NewScaffoldedcontig_7870	10548
s_1_1_contig234693	s_1_1NewScaffoldedcontig_7872	1
s_1_1_contig240964	s_1_1NewScaffoldedcontig_7878	1
s_1_1_contig37264	s_1_1NewScaffoldedcontig_7878	6095
s_1_1_contig257952	s_1_1NewScaffoldedcontig_7880	16001
s_1_1_contig218833	s_1_1NewScaffoldedcontig_7887	1703
s_1_1_contig210817	s_1_1NewScaffoldedcontig_7893	1286
s_1_1_contig248745	s_1_1NewScaffoldedcontig_7897	18834
s_1_1_contig102500	s_1_1NewScaffoldedcontig_7904	4440
s_1_1_contig81221	s_1_1NewScaffoldedcontig_7909	14883
s_1_1_contig253524	s_1_1NewScaffoldedcontig_7915	3424
s_1_1_contig62240	s_1_1NewScaffoldedcontig_7916	9476
s_1_1_contig210592	s_1_1NewScaffoldedcontig_7916	16792
s_1_1_contig125845	s_1_1NewScaffoldedcontig_7918	15147
s_1_1_contig281679	s_1_1NewScaffoldedcontig_7921	2121
s_1_1_contig183604	s_1_1NewScaffoldedcontig_7925	3579
s_1_1_contig134317	s_1_1NewScaffoldedcontig_7948	1
s_1_1_contig19356	s_1_1NewScaffoldedcontig_7948	47485
s_1_1_contig252852	s_1_1NewScaffoldedcontig_7951	133
s_1_1_contig54204	s_1_1NewScaffoldedcontig_7954	5229
s_1_1_contig234902	s_1_1NewScaffoldedcontig_7958	4974
s_1_1_contig277461	s_1_1NewScaffoldedcontig_7984	18763
s_1_1_contig269356	s_1_1NewScaffoldedcontig_7989	8007
s_1_1_contig231615	s_1_1NewScaffoldedcontig_7993	7558
s_1_1_contig279992	s_1_1NewScaffoldedcontig_8001	3774
s_1_1_contig34901	s_1_1NewScaffoldedcontig_8018	15284
s_1_1_contig135140	s_1_1NewScaffoldedcontig_8018	29906
s_1_1_contig243554	s_1_1NewScaffoldedcontig_8020	115
s_1_1_contig19238	s_1_1NewScaffoldedcontig_8027	31903
s_1_1_contig251806	s_1_1NewScaffoldedcontig_8062	47080
s_1_1_contig60497	s_1_1NewScaffoldedcontig_8064	9900
s_1_1_contig176005	s_1_1NewScaffoldedcontig_8067	13344
s_1_1_contig189560	s_1_1NewScaffoldedcontig_8067	13661
s_1_1_contig197553	s_1_1NewScaffoldedcontig_8070	1352
s_1_1_contig3908	s_1_1NewScaffoldedcontig_8074	9990
s_1_1_contig75493	s_1_1NewScaffoldedcontig_8077	37
s_1_1_contig30663	s_1_1NewScaffoldedcontig_8085	20015
s_1_1_contig255909	s_1_1NewScaffoldedcontig_8087	180
s_1_1_contig152219	s_1_1NewScaffoldedcontig_8091	7355
s_1_1_contig162387	s_1_1NewScaffoldedcontig_8095	1
s_1_1_contig194559	s_1_1NewScaffoldedcontig_8118	662
s_1_1_contig12929	s_1_1NewScaffoldedcontig_8119	5972
s_1_1_contig174413	s_1_1NewScaffoldedcontig_8120	9332
s_1_1_contig231001	s_1_1NewScaffoldedcontig_8125	15395
s_1_1_contig214796	s_1_1NewScaffoldedcontig_8125	29914
s_1_1_contig177904	s_1_1NewScaffoldedcontig_8135	10920
s_1_1_contig101222	s_1_1NewScaffoldedcontig_8135	74360
s_1_1_contig145647	s_1_1NewScaffoldedcontig_8139	1
s_1_1_contig155486	s_1_1NewScaffoldedcontig_8141	17060
s_1_1_contig145161	s_1_1NewScaffoldedcontig_8146	41
s_1_1_contig276942	s_1_1NewScaffoldedcontig_8154	13856
s_1_1_contig169875	s_1_1NewScaffoldedcontig_8154	22649
s_1_1_contig182062	s_1_1NewScaffoldedcontig_8154	24493
s_1_1_contig167039	s_1_1NewScaffoldedcontig_8155	29290
s_1_1_contig235271	s_1_1NewScaffoldedcontig_8164	1
s_1_1_contig45916	s_1_1NewScaffoldedcontig_8171	9836
s_1_1_contig70326	s_1_1NewScaffoldedcontig_8173	22
s_1_1_contig109454	s_1_1NewScaffoldedcontig_8174	6892
s_1_1_contig189329	s_1_1NewScaffoldedcontig_8177	10685
s_1_1_contig280522	s_1_1NewScaffoldedcontig_8181	1
s_1_1_contig243227	s_1_1NewScaffoldedcontig_8183	1
s_1_1_contig191475	s_1_1NewScaffoldedcontig_8183	2601
s_1_1_contig196667	s_1_1NewScaffoldedcontig_8186	25829
s_1_1_contig134457	s_1_1NewScaffoldedcontig_8193	3040
s_1_1_contig174524	s_1_1NewScaffoldedcontig_8213	16929
s_1_1_contig32782	s_1_1NewScaffoldedcontig_8219	7262
s_1_1_contig266630	s_1_1NewScaffoldedcontig_8224	33368
s_1_1_contig195018	s_1_1NewScaffoldedcontig_8234	5335
s_1_1_contig134550	s_1_1NewScaffoldedcontig_8236	46252
s_1_1_contig198550	s_1_1NewScaffoldedcontig_8247	1
s_1_1_contig254328	s_1_1NewScaffoldedcontig_8248	1
s_1_1_contig201895	s_1_1NewScaffoldedcontig_8250	1
s_1_1_contig238357	s_1_1NewScaffoldedcontig_8252	7716
s_1_1_contig80175	s_1_1NewScaffoldedcontig_8255	45695
s_1_1_contig131300	s_1_1NewScaffoldedcontig_8256	4902
s_1_1_contig172946	s_1_1NewScaffoldedcontig_8277	11367
s_1_1_contig141510	s_1_1NewScaffoldedcontig_8281	1004
s_1_1_contig124251	s_1_1NewScaffoldedcontig_8283	19324
s_1_1_contig250235	s_1_1NewScaffoldedcontig_8284	9955
s_1_1_contig195089	s_1_1NewScaffoldedcontig_8285	3470
s_1_1_contig201674	s_1_1NewScaffoldedcontig_8286	142
s_1_1_contig102713	s_1_1NewScaffoldedcontig_8293	1
s_1_1_contig251717	s_1_1NewScaffoldedcontig_8294	193
s_1_1_contig281467	s_1_1NewScaffoldedcontig_8294	777
s_1_1_contig49829	s_1_1NewScaffoldedcontig_8294	9565
s_1_1_contig16251	s_1_1NewScaffoldedcontig_8296	29407
s_1_1_contig168177	s_1_1NewScaffoldedcontig_8300	1
s_1_1_contig268272	s_1_1NewScaffoldedcontig_8302	1847
s_1_1_contig52098	s_1_1NewScaffoldedcontig_8316	6381
s_1_1_contig259430	s_1_1NewScaffoldedcontig_8334	626
s_1_1_contig125405	s_1_1NewScaffoldedcontig_8341	15533
s_1_1_contig195619	s_1_1NewScaffoldedcontig_8341	20395
s_1_1_contig129397	s_1_1NewScaffoldedcontig_8344	14308
s_1_1_contig246628	s_1_1NewScaffoldedcontig_8349	6649
s_1_1_contig190328	s_1_1NewScaffoldedcontig_8355	4182
s_1_1_contig23263	s_1_1NewScaffoldedcontig_8356	3638
s_1_1_contig208837	s_1_1NewScaffoldedcontig_8362	1344
s_1_1_contig110097	s_1_1NewScaffoldedcontig_8379	4943
s_1_1_contig47552	s_1_1NewScaffoldedcontig_8380	7560
s_1_1_contig180412	s_1_1NewScaffoldedcontig_8381	1752
s_1_1_contig206931	s_1_1NewScaffoldedcontig_8382	655
s_1_1_contig189475	s_1_1NewScaffoldedcontig_8382	832
s_1_1_contig110708	s_1_1NewScaffoldedcontig_8383	1
s_1_1_contig268831	s_1_1NewScaffoldedcontig_8388	11236
s_1_1_contig228107	s_1_1NewScaffoldedcontig_8388	19341
s_1_1_contig16288	s_1_1NewScaffoldedcontig_8399	43155
s_1_1_contig22905	s_1_1NewScaffoldedcontig_8407	23430
s_1_1_contig256266	s_1_1NewScaffoldedcontig_8410	12449
s_1_1_contig190991	s_1_1NewScaffoldedcontig_8411	18185
s_1_1_contig111020	s_1_1NewScaffoldedcontig_8414	1196
s_1_1_contig259260	s_1_1NewScaffoldedcontig_8417	13645
s_1_1_contig143300	s_1_1NewScaffoldedcontig_8419	20351
s_1_1_contig112717	s_1_1NewScaffoldedcontig_8426	3305
s_1_1_contig245193	s_1_1NewScaffoldedcontig_8435	3306
s_1_1_contig179466	s_1_1NewScaffoldedcontig_8439	21230
s_1_1_contig12241	s_1_1NewScaffoldedcontig_8450	45612
s_1_1_contig229620	s_1_1NewScaffoldedcontig_8450	60841
s_1_1_contig192290	s_1_1NewScaffoldedcontig_8450	61804
s_1_1_contig206930	s_1_1NewScaffoldedcontig_8451	9918
s_1_1_contig248309	s_1_1NewScaffoldedcontig_8465	40275
s_1_1_contig246453	s_1_1NewScaffoldedcontig_8465	47248
s_1_1_contig188680	s_1_1NewScaffoldedcontig_8478	44384
s_1_1_contig13143	s_1_1NewScaffoldedcontig_8488	22
s_1_1_contig191097	s_1_1NewScaffoldedcontig_8528	13876
s_1_1_contig278236	s_1_1NewScaffoldedcontig_8533	32678
s_1_1_contig155128	s_1_1NewScaffoldedcontig_8543	11350
s_1_1_contig35056	s_1_1NewScaffoldedcontig_8555	1
s_1_1_contig91321	s_1_1NewScaffoldedcontig_8561	1
s_1_1_contig172754	s_1_1NewScaffoldedcontig_8569	1867
s_1_1_contig147297	s_1_1NewScaffoldedcontig_8574	1
s_1_1_contig277459	s_1_1NewScaffoldedcontig_8578	10766
s_1_1_contig196399	s_1_1NewScaffoldedcontig_8579	1
s_1_1_contig176971	s_1_1NewScaffoldedcontig_8579	40461
s_1_1_contig141209	s_1_1NewScaffoldedcontig_8581	474
s_1_1_contig189489	s_1_1NewScaffoldedcontig_8583	341
s_1_1_contig160417	s_1_1NewScaffoldedcontig_8586	2769
s_1_1_contig212263	s_1_1NewScaffoldedcontig_8588	1
s_1_1_contig243651	s_1_1NewScaffoldedcontig_8588	98
s_1_1_contig181909	s_1_1NewScaffoldedcontig_8589	11570
s_1_1_contig254893	s_1_1NewScaffoldedcontig_8598	1
s_1_1_contig254936	s_1_1NewScaffoldedcontig_8599	45514
s_1_1_contig85512	s_1_1NewScaffoldedcontig_8604	47021
s_1_1_contig125491	s_1_1NewScaffoldedcontig_8620	1856
s_1_1_contig21738	s_1_1NewScaffoldedcontig_8622	3601
s_1_1_contig209039	s_1_1NewScaffoldedcontig_8637	5800
s_1_1_contig71199	s_1_1NewScaffoldedcontig_8641	1
s_1_1_contig86473	s_1_1NewScaffoldedcontig_8644	91
s_1_1_contig69846	s_1_1NewScaffoldedcontig_8645	99
s_1_1_contig255657	s_1_1NewScaffoldedcontig_8648	34196
s_1_1_contig173895	s_1_1NewScaffoldedcontig_8650	12116
s_1_1_contig243081	s_1_1NewScaffoldedcontig_8660	23952
s_1_1_contig108064	s_1_1NewScaffoldedcontig_8690	13591
s_1_1_contig222475	s_1_1NewScaffoldedcontig_8704	13625
s_1_1_contig51646	s_1_1NewScaffoldedcontig_8718	7366
s_1_1_contig190066	s_1_1NewScaffoldedcontig_8734	1
s_1_1_contig20768	s_1_1NewScaffoldedcontig_8735	10578
s_1_1_contig181336	s_1_1NewScaffoldedcontig_8737	24
s_1_1_contig266198	s_1_1NewScaffoldedcontig_8738	33393
s_1_1_contig142311	s_1_1NewScaffoldedcontig_8745	9329
s_1_1_contig244080	s_1_1NewScaffoldedcontig_8745	16550
s_1_1_contig101743	s_1_1NewScaffoldedcontig_8751	1
s_1_1_contig188004	s_1_1NewScaffoldedcontig_8751	1500
s_1_1_contig228619	s_1_1NewScaffoldedcontig_8756	3041
s_1_1_contig245634	s_1_1NewScaffoldedcontig_8756	18679
s_1_1_contig196818	s_1_1NewScaffoldedcontig_8762	5497
s_1_1_contig234722	s_1_1NewScaffoldedcontig_8762	5584
s_1_1_contig255505	s_1_1NewScaffoldedcontig_8762	5594
s_1_1_contig46720	s_1_1NewScaffoldedcontig_8768	15987
s_1_1_contig199284	s_1_1NewScaffoldedcontig_8778	15356
s_1_1_contig248079	s_1_1NewScaffoldedcontig_8788	3923
s_1_1_contig245270	s_1_1NewScaffoldedcontig_8793	6
s_1_1_contig40644	s_1_1NewScaffoldedcontig_8801	1258
s_1_1_contig15128	s_1_1NewScaffoldedcontig_8807	1
s_1_1_contig75367	s_1_1NewScaffoldedcontig_8825	1
s_1_1_contig243317	s_1_1NewScaffoldedcontig_8834	1
s_1_1_contig110499	s_1_1NewScaffoldedcontig_8834	690
s_1_1_contig138026	s_1_1NewScaffoldedcontig_8847	1
s_1_1_contig167224	s_1_1NewScaffoldedcontig_8860	24
s_1_1_contig186382	s_1_1NewScaffoldedcontig_8862	1
s_1_1_contig151406	s_1_1NewScaffoldedcontig_8864	1
s_1_1_contig125348	s_1_1NewScaffoldedcontig_8869	1
s_1_1_contig114638	s_1_1NewScaffoldedcontig_8869	4753
s_1_1_contig152028	s_1_1NewScaffoldedcontig_8870	1
s_1_1_contig41269	s_1_1NewScaffoldedcontig_8872	3152
s_1_1_contig152692	s_1_1NewScaffoldedcontig_8876	1246
s_1_1_contig124323	s_1_1NewScaffoldedcontig_8890	24728
s_1_1_contig249109	s_1_1NewScaffoldedcontig_8894	1
s_1_1_contig208296	s_1_1NewScaffoldedcontig_8894	36547
s_1_1_contig29326	s_1_1NewScaffoldedcontig_8894	44960
s_1_1_contig234152	s_1_1NewScaffoldedcontig_8901	1
s_1_1_contig108575	s_1_1NewScaffoldedcontig_8904	8915
s_1_1_contig171078	s_1_1NewScaffoldedcontig_8905	11269
s_1_1_contig237336	s_1_1NewScaffoldedcontig_8905	13194
s_1_1_contig215344	s_1_1NewScaffoldedcontig_8918	1
s_1_1_contig246208	s_1_1NewScaffoldedcontig_8935	8251
s_1_1_contig279587	s_1_1NewScaffoldedcontig_8946	12037
s_1_1_contig33416	s_1_1NewScaffoldedcontig_8965	28075
s_1_1_contig178653	s_1_1NewScaffoldedcontig_8965	41484
s_1_1_contig239481	s_1_1NewScaffoldedcontig_8968	15834
s_1_1_contig86898	s_1_1NewScaffoldedcontig_8975	51577
s_1_1_contig144992	s_1_1NewScaffoldedcontig_8977	3872
s_1_1_contig150463	s_1_1NewScaffoldedcontig_8988	16326
s_1_1_contig207744	s_1_1NewScaffoldedcontig_8988	17015
s_1_1_contig117183	s_1_1NewScaffoldedcontig_8989	1
s_1_1_contig245178	s_1_1NewScaffoldedcontig_8998	223
s_1_1_contig199925	s_1_1NewScaffoldedcontig_8998	995
s_1_1_contig187827	s_1_1NewScaffoldedcontig_9010	1
s_1_1_contig230862	s_1_1NewScaffoldedcontig_9010	6873
s_1_1_contig193897	s_1_1NewScaffoldedcontig_9011	9100
s_1_1_contig12052	s_1_1NewScaffoldedcontig_9018	1
s_1_1_contig124822	s_1_1NewScaffoldedcontig_9032	41
s_1_1_contig234097	s_1_1NewScaffoldedcontig_9034	19158
s_1_1_contig152276	s_1_1NewScaffoldedcontig_9034	59796
s_1_1_contig206951	s_1_1NewScaffoldedcontig_9035	4751
s_1_1_contig272529	s_1_1NewScaffoldedcontig_9036	1
s_1_1_contig200667	s_1_1NewScaffoldedcontig_9041	7624
s_1_1_contig271595	s_1_1NewScaffoldedcontig_9041	17106
s_1_1_contig254435	s_1_1NewScaffoldedcontig_9062	6757
s_1_1_contig154450	s_1_1NewScaffoldedcontig_9065	3
s_1_1_contig139556	s_1_1NewScaffoldedcontig_9073	30909
s_1_1_contig194939	s_1_1NewScaffoldedcontig_9075	1
s_1_1_contig219482	s_1_1NewScaffoldedcontig_9077	1110
s_1_1_contig176945	s_1_1NewScaffoldedcontig_9079	48361
s_1_1_contig146391	s_1_1NewScaffoldedcontig_9080	1
s_1_1_contig253027	s_1_1NewScaffoldedcontig_9085	528
s_1_1_contig177944	s_1_1NewScaffoldedcontig_9086	1
s_1_1_contig18771	s_1_1NewScaffoldedcontig_9086	16004
s_1_1_contig117414	s_1_1NewScaffoldedcontig_9087	13943
s_1_1_contig153061	s_1_1NewScaffoldedcontig_9105	22
s_1_1_contig148550	s_1_1NewScaffoldedcontig_9109	1
s_1_1_contig45387	s_1_1NewScaffoldedcontig_9120	25061
s_1_1_contig16851	s_1_1NewScaffoldedcontig_9121	1
s_1_1_contig260546	s_1_1NewScaffoldedcontig_9131	1
s_1_1_contig94254	s_1_1NewScaffoldedcontig_9136	1
s_1_1_contig166746	s_1_1NewScaffoldedcontig_9139	5903
s_1_1_contig211545	s_1_1NewScaffoldedcontig_9142	1591
s_1_1_contig211914	s_1_1NewScaffoldedcontig_9142	1745
s_1_1_contig277224	s_1_1NewScaffoldedcontig_9142	1985
s_1_1_contig281265	s_1_1NewScaffoldedcontig_9143	5118
s_1_1_contig257093	s_1_1NewScaffoldedcontig_9143	5216
s_1_1_contig16519	s_1_1NewScaffoldedcontig_9143	9469
s_1_1_contig129654	s_1_1NewScaffoldedcontig_9143	12848
s_1_1_contig189557	s_1_1NewScaffoldedcontig_9144	1
s_1_1_contig212302	s_1_1NewScaffoldedcontig_9144	1
s_1_1_contig154912	s_1_1NewScaffoldedcontig_9144	1
s_1_1_contig154257	s_1_1NewScaffoldedcontig_9144	4
s_1_1_contig154986	s_1_1NewScaffoldedcontig_9144	333
s_1_1_contig234930	s_1_1NewScaffoldedcontig_9146	1
s_1_1_contig243342	s_1_1NewScaffoldedcontig_9159	19226
s_1_1_contig207077	s_1_1NewScaffoldedcontig_9162	3423
s_1_1_contig253577	s_1_1NewScaffoldedcontig_9166	3693
s_1_1_contig196246	s_1_1NewScaffoldedcontig_9169	4342
s_1_1_contig178274	s_1_1NewScaffoldedcontig_9169	8992
s_1_1_contig234483	s_1_1NewScaffoldedcontig_9175	19961
s_1_1_contig176445	s_1_1NewScaffoldedcontig_9192	6728
s_1_1_contig16589	s_1_1NewScaffoldedcontig_9213	1
s_1_1_contig211399	s_1_1NewScaffoldedcontig_9213	18113
s_1_1_contig190760	s_1_1NewScaffoldedcontig_9214	28546
s_1_1_contig261692	s_1_1NewScaffoldedcontig_9228	26253
s_1_1_contig44288	s_1_1NewScaffoldedcontig_9229	20900
s_1_1_contig163559	s_1_1NewScaffoldedcontig_9234	1
s_1_1_contig263083	s_1_1NewScaffoldedcontig_9251	457
s_1_1_contig44013	s_1_1NewScaffoldedcontig_9256	49176
s_1_1_contig35420	s_1_1NewScaffoldedcontig_9260	16569
s_1_1_contig231321	s_1_1NewScaffoldedcontig_9262	2828
s_1_1_contig3686	s_1_1NewScaffoldedcontig_9270	3326
s_1_1_contig251861	s_1_1NewScaffoldedcontig_9280	1598
s_1_1_contig240741	s_1_1NewScaffoldedcontig_9283	1
s_1_1_contig89903	s_1_1NewScaffoldedcontig_9288	7162
s_1_1_contig213886	s_1_1NewScaffoldedcontig_9309	1
s_1_1_contig213417	s_1_1NewScaffoldedcontig_9309	1
s_1_1_contig268273	s_1_1NewScaffoldedcontig_9309	3983
s_1_1_contig197194	s_1_1NewScaffoldedcontig_9313	10371
s_1_1_contig57028	s_1_1NewScaffoldedcontig_9325	9007
s_1_1_contig248941	s_1_1NewScaffoldedcontig_9326	2809
s_1_1_contig178713	s_1_1NewScaffoldedcontig_9335	1
s_1_1_contig37722	s_1_1NewScaffoldedcontig_9336	3006
s_1_1_contig162244	s_1_1NewScaffoldedcontig_9340	35832
s_1_1_contig212925	s_1_1NewScaffoldedcontig_9341	1
s_1_1_contig150303	s_1_1NewScaffoldedcontig_9348	1
s_1_1_contig267327	s_1_1NewScaffoldedcontig_9354	15
s_1_1_contig86089	s_1_1NewScaffoldedcontig_9354	2417
s_1_1_contig245605	s_1_1NewScaffoldedcontig_9362	13068
s_1_1_contig136874	s_1_1NewScaffoldedcontig_9362	21113
s_1_1_contig215603	s_1_1NewScaffoldedcontig_9367	1
s_1_1_contig103649	s_1_1NewScaffoldedcontig_9370	20453
s_1_1_contig225126	s_1_1NewScaffoldedcontig_9382	43047
s_1_1_contig263923	s_1_1NewScaffoldedcontig_9398	16053
s_1_1_contig144692	s_1_1NewScaffoldedcontig_9418	1
s_1_1_contig115810	s_1_1NewScaffoldedcontig_9425	27245
s_1_1_contig209827	s_1_1NewScaffoldedcontig_9429	9278
s_1_1_contig250790	s_1_1NewScaffoldedcontig_9443	4485
s_1_1_contig103646	s_1_1NewScaffoldedcontig_9443	4786
s_1_1_contig61442	s_1_1NewScaffoldedcontig_9444	7853
s_1_1_contig95326	s_1_1NewScaffoldedcontig_9445	38888
s_1_1_contig238550	s_1_1NewScaffoldedcontig_9446	5726
s_1_1_contig79560	s_1_1NewScaffoldedcontig_9456	1
s_1_1_contig251020	s_1_1NewScaffoldedcontig_9456	19579
s_1_1_contig161253	s_1_1NewScaffoldedcontig_9472	5557
s_1_1_contig246601	s_1_1NewScaffoldedcontig_9472	23185
s_1_1_contig214904	s_1_1NewScaffoldedcontig_9482	523
s_1_1_contig195020	s_1_1NewScaffoldedcontig_9485	1
s_1_1_contig26016	s_1_1NewScaffoldedcontig_9503	1
s_1_1_contig53131	s_1_1NewScaffoldedcontig_9520	24729
s_1_1_contig206856	s_1_1NewScaffoldedcontig_9527	16906
s_1_1_contig238051	s_1_1NewScaffoldedcontig_9528	15062
s_1_1_contig48304	s_1_1NewScaffoldedcontig_9531	222
s_1_1_contig121901	s_1_1NewScaffoldedcontig_9537	1
s_1_1_contig158687	s_1_1NewScaffoldedcontig_9538	14241
s_1_1_contig184766	s_1_1NewScaffoldedcontig_9546	67666
s_1_1_contig19585	s_1_1NewScaffoldedcontig_9554	111347
s_1_1_contig161492	s_1_1NewScaffoldedcontig_9554	119282
s_1_1_contig149187	s_1_1NewScaffoldedcontig_9556	17249
s_1_1_contig276334	s_1_1NewScaffoldedcontig_9564	4837
s_1_1_contig144465	s_1_1NewScaffoldedcontig_9568	6017
s_1_1_contig78295	s_1_1NewScaffoldedcontig_9570	206
s_1_1_contig207081	s_1_1NewScaffoldedcontig_9585	17931
s_1_1_contig107290	s_1_1NewScaffoldedcontig_9593	1
s_1_1_contig148712	s_1_1NewScaffoldedcontig_9606	21024
s_1_1_contig263937	s_1_1NewScaffoldedcontig_9612	6399
s_1_1_contig38478	s_1_1NewScaffoldedcontig_9624	24683
s_1_1_contig230853	s_1_1NewScaffoldedcontig_9625	38860
s_1_1_contig233141	s_1_1NewScaffoldedcontig_9627	1
s_1_1_contig184918	s_1_1NewScaffoldedcontig_9643	5549
s_1_1_contig62034	s_1_1NewScaffoldedcontig_9645	3356
s_1_1_contig256916	s_1_1NewScaffoldedcontig_9648	2330
s_1_1_contig244275	s_1_1NewScaffoldedcontig_9648	17946
s_1_1_contig30992	s_1_1NewScaffoldedcontig_9660	1
s_1_1_contig258999	s_1_1NewScaffoldedcontig_9663	15061
s_1_1_contig259150	s_1_1NewScaffoldedcontig_9692	710
s_1_1_contig132753	s_1_1NewScaffoldedcontig_9693	1
s_1_1_contig209182	s_1_1NewScaffoldedcontig_9701	2760
s_1_1_contig4436	s_1_1NewScaffoldedcontig_9707	4260
s_1_1_contig200135	s_1_1NewScaffoldedcontig_9707	15352
s_1_1_contig211046	s_1_1NewScaffoldedcontig_9715	30232
s_1_1_contig165525	s_1_1NewScaffoldedcontig_9731	6461
s_1_1_contig274251	s_1_1NewScaffoldedcontig_9748	7423
s_1_1_contig177232	s_1_1NewScaffoldedcontig_9758	83692
s_1_1_contig262886	s_1_1NewScaffoldedcontig_9766	1
s_1_1_contig214764	s_1_1NewScaffoldedcontig_9769	33
s_1_1_contig281287	s_1_1NewScaffoldedcontig_9769	93
s_1_1_contig202207	s_1_1NewScaffoldedcontig_9771	3502
s_1_1_contig257348	s_1_1NewScaffoldedcontig_9777	5121
s_1_1_contig135168	s_1_1NewScaffoldedcontig_9782	15293
s_1_1_contig92508	s_1_1NewScaffoldedcontig_9782	78312
s_1_1_contig186866	s_1_1NewScaffoldedcontig_9787	1089
s_1_1_contig82254	s_1_1NewScaffoldedcontig_9795	1
s_1_1_contig181260	s_1_1NewScaffoldedcontig_9802	1
s_1_1_contig190169	s_1_1NewScaffoldedcontig_9806	36
s_1_1_contig143211	s_1_1NewScaffoldedcontig_9817	1
s_1_1_contig154372	s_1_1NewScaffoldedcontig_9822	1
s_1_1_contig143480	s_1_1NewScaffoldedcontig_9833	12171
s_1_1_contig246648	s_1_1NewScaffoldedcontig_9833	24509
s_1_1_contig243645	s_1_1NewScaffoldedcontig_9834	1552
s_1_1_contig151045	s_1_1NewScaffoldedcontig_9835	30622
s_1_1_contig206162	s_1_1NewScaffoldedcontig_9856	31166
s_1_1_contig148901	s_1_1NewScaffoldedcontig_9874	7173
s_1_1_contig270867	s_1_1NewScaffoldedcontig_9875	4410
s_1_1_contig221726	s_1_1NewScaffoldedcontig_9878	1
s_1_1_contig233230	s_1_1NewScaffoldedcontig_9882	7427
s_1_1_contig120225	s_1_1NewScaffoldedcontig_9884	146
s_1_1_contig103653	s_1_1NewScaffoldedcontig_9891	1
s_1_1_contig36231	s_1_1NewScaffoldedcontig_9897	1
s_1_1_contig167075	s_1_1NewScaffoldedcontig_9897	1668
s_1_1_contig94478	s_1_1NewScaffoldedcontig_9901	1867
s_1_1_contig231563	s_1_1NewScaffoldedcontig_9903	55988
s_1_1_contig191532	s_1_1NewScaffoldedcontig_9911	9783
s_1_1_contig230694	s_1_1NewScaffoldedcontig_9911	12245
s_1_1_contig123341	s_1_1NewScaffoldedcontig_9911	45494
s_1_1_contig206374	s_1_1NewScaffoldedcontig_9912	1
s_1_1_contig268295	s_1_1NewScaffoldedcontig_9914	16884
s_1_1_contig186755	s_1_1NewScaffoldedcontig_9924	6825
s_1_1_contig166309	s_1_1NewScaffoldedcontig_9926	8872
s_1_1_contig268776	s_1_1NewScaffoldedcontig_9926	57567
s_1_1_contig248060	s_1_1NewScaffoldedcontig_9930	1
s_1_1_contig231686	s_1_1NewScaffoldedcontig_9933	1036
s_1_1_contig10050	s_1_1NewScaffoldedcontig_9935	1
s_1_1_contig268866	s_1_1NewScaffoldedcontig_9943	1
s_1_1_contig141752	s_1_1NewScaffoldedcontig_9944	19192
s_1_1_contig154921	s_1_1NewScaffoldedcontig_9958	1
s_1_1_contig254585	s_1_1NewScaffoldedcontig_9958	582
s_1_1_contig277800	s_1_1NewScaffoldedcontig_9958	623
s_1_1_contig162252	s_1_1NewScaffoldedcontig_9962	1
s_1_1_contig204063	s_1_1NewScaffoldedcontig_9962	2264
s_1_1_contig22695	s_1_1NewScaffoldedcontig_9963	364
s_1_1_contig203509	s_1_1NewScaffoldedcontig_9964	13
s_1_1_contig258028	s_1_1NewScaffoldedcontig_9982	2118
s_1_1_contig189279	s_1_1NewScaffoldedcontig_9990	10871
s_1_1_contig282160	s_1_1NewScaffoldedcontig_9991	7664
s_1_1_contig9776	s_1_1NewScaffoldedcontig_9994	16550
s_1_1_contig18594	s_1_1NewScaffoldedcontig_9995	54203
s_1_1_contig107066	s_1_1NewScaffoldedcontig_10000	1
s_1_1_contig250137	s_1_1NewScaffoldedcontig_10001	1
s_1_1_contig252227	s_1_1NewScaffoldedcontig_10001	1819
s_1_1_contig85366	s_1_1NewScaffoldedcontig_10002	12908
s_1_1_contig186601	s_1_1NewScaffoldedcontig_10002	40517
s_1_1_contig250302	s_1_1NewScaffoldedcontig_10006	3593
s_1_1_contig253947	s_1_1NewScaffoldedcontig_10006	29212
s_1_1_contig47954	s_1_1NewScaffoldedcontig_10012	13402
s_1_1_contig80190	s_1_1NewScaffoldedcontig_10025	5169
s_1_1_contig124354	s_1_1NewScaffoldedcontig_10035	17858
s_1_1_contig201273	s_1_1NewScaffoldedcontig_10042	14726
s_1_1_contig152227	s_1_1NewScaffoldedcontig_10049	1
s_1_1_contig211240	s_1_1NewScaffoldedcontig_10050	8690
s_1_1_contig257831	s_1_1NewScaffoldedcontig_10050	28004
s_1_1_contig85761	s_1_1NewScaffoldedcontig_10051	2672
s_1_1_contig245464	s_1_1NewScaffoldedcontig_10065	3203
s_1_1_contig277219	s_1_1NewScaffoldedcontig_10069	1
s_1_1_contig258074	s_1_1NewScaffoldedcontig_10084	21611
s_1_1_contig217924	s_1_1NewScaffoldedcontig_10089	1
s_1_1_contig243992	s_1_1NewScaffoldedcontig_10093	6960
s_1_1_contig4975	s_1_1NewScaffoldedcontig_10095	22039
s_1_1_contig155659	s_1_1NewScaffoldedcontig_10095	34376
s_1_1_contig27803	s_1_1NewScaffoldedcontig_10101	1
s_1_1_contig212572	s_1_1NewScaffoldedcontig_10123	2816
s_1_1_contig265542	s_1_1NewScaffoldedcontig_10126	2385
s_1_1_contig31216	s_1_1NewScaffoldedcontig_10134	13342
s_1_1_contig175386	s_1_1NewScaffoldedcontig_10135	1
s_1_1_contig167225	s_1_1NewScaffoldedcontig_10138	10433
s_1_1_contig62284	s_1_1NewScaffoldedcontig_10142	41633
s_1_1_contig194257	s_1_1NewScaffoldedcontig_10142	45993
s_1_1_contig249121	s_1_1NewScaffoldedcontig_10143	4272
s_1_1_contig3186	s_1_1NewScaffoldedcontig_10151	7671
s_1_1_contig202610	s_1_1NewScaffoldedcontig_10157	37
s_1_1_contig199893	s_1_1NewScaffoldedcontig_10157	49
s_1_1_contig183706	s_1_1NewScaffoldedcontig_10163	27369
s_1_1_contig108304	s_1_1NewScaffoldedcontig_10165	163
s_1_1_contig169874	s_1_1NewScaffoldedcontig_10168	2485
s_1_1_contig44418	s_1_1NewScaffoldedcontig_10168	16256
s_1_1_contig252038	s_1_1NewScaffoldedcontig_10182	1
s_1_1_contig190067	s_1_1NewScaffoldedcontig_10200	27052
s_1_1_contig248459	s_1_1NewScaffoldedcontig_10207	30595
s_1_1_contig215692	s_1_1NewScaffoldedcontig_10214	29078
s_1_1_contig165437	s_1_1NewScaffoldedcontig_10218	1
s_1_1_contig241657	s_1_1NewScaffoldedcontig_10229	1
s_1_1_contig161833	s_1_1NewScaffoldedcontig_10233	6638
s_1_1_contig21220	s_1_1NewScaffoldedcontig_10233	18211
s_1_1_contig115056	s_1_1NewScaffoldedcontig_10249	1
s_1_1_contig258610	s_1_1NewScaffoldedcontig_10253	3699
s_1_1_contig51622	s_1_1NewScaffoldedcontig_10259	3090
s_1_1_contig22955	s_1_1NewScaffoldedcontig_10259	19808
s_1_1_contig116058	s_1_1NewScaffoldedcontig_10272	36744
s_1_1_contig158495	s_1_1NewScaffoldedcontig_10274	43820
s_1_1_contig151630	s_1_1NewScaffoldedcontig_10278	9559
s_1_1_contig177951	s_1_1NewScaffoldedcontig_10282	6378
s_1_1_contig56334	s_1_1NewScaffoldedcontig_10282	6661
s_1_1_contig151594	s_1_1NewScaffoldedcontig_10282	12742
s_1_1_contig143161	s_1_1NewScaffoldedcontig_10283	10076
s_1_1_contig136406	s_1_1NewScaffoldedcontig_10290	5986
s_1_1_contig180526	s_1_1NewScaffoldedcontig_10304	201
s_1_1_contig250698	s_1_1NewScaffoldedcontig_10305	16670
s_1_1_contig143701	s_1_1NewScaffoldedcontig_10308	20238
s_1_1_contig69211	s_1_1NewScaffoldedcontig_10308	25345
s_1_1_contig199535	s_1_1NewScaffoldedcontig_10309	30148
s_1_1_contig255576	s_1_1NewScaffoldedcontig_10312	2415
s_1_1_contig200983	s_1_1NewScaffoldedcontig_10323	25337
s_1_1_contig197051	s_1_1NewScaffoldedcontig_10323	25414
s_1_1_contig146768	s_1_1NewScaffoldedcontig_10329	27796
s_1_1_contig65153	s_1_1NewScaffoldedcontig_10333	27928
s_1_1_contig133539	s_1_1NewScaffoldedcontig_10361	1
s_1_1_contig63982	s_1_1NewScaffoldedcontig_10373	42
s_1_1_contig216631	s_1_1NewScaffoldedcontig_10377	1
s_1_1_contig199501	s_1_1NewScaffoldedcontig_10377	15780
s_1_1_contig201279	s_1_1NewScaffoldedcontig_10377	25354
s_1_1_contig174800	s_1_1NewScaffoldedcontig_10385	1
s_1_1_contig192766	s_1_1NewScaffoldedcontig_10398	2579
s_1_1_contig236104	s_1_1NewScaffoldedcontig_10409	1
s_1_1_contig149627	s_1_1NewScaffoldedcontig_10419	163
s_1_1_contig244196	s_1_1NewScaffoldedcontig_10420	1
s_1_1_contig245046	s_1_1NewScaffoldedcontig_10426	3095
s_1_1_contig208223	s_1_1NewScaffoldedcontig_10430	93
s_1_1_contig109608	s_1_1NewScaffoldedcontig_10433	2665
s_1_1_contig248094	s_1_1NewScaffoldedcontig_10437	19518
s_1_1_contig130619	s_1_1NewScaffoldedcontig_10438	12554
s_1_1_contig220618	s_1_1NewScaffoldedcontig_10438	24262
s_1_1_contig30749	s_1_1NewScaffoldedcontig_10439	1894
s_1_1_contig84321	s_1_1NewScaffoldedcontig_10439	12569
s_1_1_contig271248	s_1_1NewScaffoldedcontig_10443	2026
s_1_1_contig195025	s_1_1NewScaffoldedcontig_10445	1
s_1_1_contig171004	s_1_1NewScaffoldedcontig_10445	1992
s_1_1_contig139229	s_1_1NewScaffoldedcontig_10447	21235
s_1_1_contig199079	s_1_1NewScaffoldedcontig_10455	1
s_1_1_contig248576	s_1_1NewScaffoldedcontig_10464	2135
s_1_1_contig158940	s_1_1NewScaffoldedcontig_10479	2086
s_1_1_contig61399	s_1_1NewScaffoldedcontig_10485	388
s_1_1_contig83257	s_1_1NewScaffoldedcontig_10492	1
s_1_1_contig167844	s_1_1NewScaffoldedcontig_10501	1
s_1_1_contig241157	s_1_1NewScaffoldedcontig_10501	4960
s_1_1_contig274430	s_1_1NewScaffoldedcontig_10502	3996
s_1_1_contig97273	s_1_1NewScaffoldedcontig_10503	5862
s_1_1_contig99648	s_1_1NewScaffoldedcontig_10508	1410
s_1_1_contig234523	s_1_1NewScaffoldedcontig_10518	43225
s_1_1_contig194516	s_1_1NewScaffoldedcontig_10521	24
s_1_1_contig15479	s_1_1NewScaffoldedcontig_10521	29410
s_1_1_contig214866	s_1_1NewScaffoldedcontig_10524	4433
s_1_1_contig246670	s_1_1NewScaffoldedcontig_10524	4434
s_1_1_contig245439	s_1_1NewScaffoldedcontig_10524	4434
s_1_1_contig256664	s_1_1NewScaffoldedcontig_10524	4434
s_1_1_contig118281	s_1_1NewScaffoldedcontig_10527	1
s_1_1_contig242243	s_1_1NewScaffoldedcontig_10530	5186
s_1_1_contig186357	s_1_1NewScaffoldedcontig_10548	5375
s_1_1_contig130763	s_1_1NewScaffoldedcontig_10549	17
s_1_1_contig135643	s_1_1NewScaffoldedcontig_10568	61195
s_1_1_contig21102	s_1_1NewScaffoldedcontig_10571	4758
s_1_1_contig54897	s_1_1NewScaffoldedcontig_10581	19074
s_1_1_contig277918	s_1_1NewScaffoldedcontig_10583	36542
s_1_1_contig248095	s_1_1NewScaffoldedcontig_10584	29445
s_1_1_contig262503	s_1_1NewScaffoldedcontig_10601	22834
s_1_1_contig230533	s_1_1NewScaffoldedcontig_10618	44859
s_1_1_contig244958	s_1_1NewScaffoldedcontig_10620	19657
s_1_1_contig33986	s_1_1NewScaffoldedcontig_10626	8863
s_1_1_contig143607	s_1_1NewScaffoldedcontig_10626	9189
s_1_1_contig267194	s_1_1NewScaffoldedcontig_10627	1
s_1_1_contig249504	s_1_1NewScaffoldedcontig_10627	66500
s_1_1_contig118611	s_1_1NewScaffoldedcontig_10629	4078
s_1_1_contig87374	s_1_1NewScaffoldedcontig_10636	1
s_1_1_contig44860	s_1_1NewScaffoldedcontig_10644	35755
s_1_1_contig145058	s_1_1NewScaffoldedcontig_10646	1
s_1_1_contig259951	s_1_1NewScaffoldedcontig_10661	5946
s_1_1_contig115799	s_1_1NewScaffoldedcontig_10664	14176
s_1_1_contig196656	s_1_1NewScaffoldedcontig_10669	18710
s_1_1_contig103609	s_1_1NewScaffoldedcontig_10671	18717
s_1_1_contig130529	s_1_1NewScaffoldedcontig_10681	32498
s_1_1_contig206421	s_1_1NewScaffoldedcontig_10689	18223
s_1_1_contig254167	s_1_1NewScaffoldedcontig_10695	502
s_1_1_contig242956	s_1_1NewScaffoldedcontig_10735	5493
s_1_1_contig53814	s_1_1NewScaffoldedcontig_10738	1
s_1_1_contig78258	s_1_1NewScaffoldedcontig_10738	55679
s_1_1_contig242776	s_1_1NewScaffoldedcontig_10743	6418
s_1_1_contig20395	s_1_1NewScaffoldedcontig_10743	30113
s_1_1_contig98724	s_1_1NewScaffoldedcontig_10747	286
s_1_1_contig227009	s_1_1NewScaffoldedcontig_10751	1
s_1_1_contig194594	s_1_1NewScaffoldedcontig_10756	606
s_1_1_contig59221	s_1_1NewScaffoldedcontig_10766	1
s_1_1_contig202012	s_1_1NewScaffoldedcontig_10790	7576
s_1_1_contig169892	s_1_1NewScaffoldedcontig_10802	1
s_1_1_contig218362	s_1_1NewScaffoldedcontig_10806	6210
s_1_1_contig56149	s_1_1NewScaffoldedcontig_10807	2292
s_1_1_contig131038	s_1_1NewScaffoldedcontig_10823	8828
s_1_1_contig100761	s_1_1NewScaffoldedcontig_10840	766
s_1_1_contig71658	s_1_1NewScaffoldedcontig_10841	1117
s_1_1_contig184233	s_1_1NewScaffoldedcontig_10844	11085
s_1_1_contig207075	s_1_1NewScaffoldedcontig_10861	1
s_1_1_contig141666	s_1_1NewScaffoldedcontig_10861	4121
s_1_1_contig107514	s_1_1NewScaffoldedcontig_10865	1
s_1_1_contig118352	s_1_1NewScaffoldedcontig_10871	798
s_1_1_contig173438	s_1_1NewScaffoldedcontig_10871	15271
s_1_1_contig281637	s_1_1NewScaffoldedcontig_10871	17557
s_1_1_contig248133	s_1_1NewScaffoldedcontig_10873	1571
s_1_1_contig276911	s_1_1NewScaffoldedcontig_10882	143
s_1_1_contig273336	s_1_1NewScaffoldedcontig_10885	20659
s_1_1_contig212251	s_1_1NewScaffoldedcontig_10897	3579
s_1_1_contig50040	s_1_1NewScaffoldedcontig_10919	18179
s_1_1_contig109012	s_1_1NewScaffoldedcontig_10926	14295
s_1_1_contig204951	s_1_1NewScaffoldedcontig_10926	16450
s_1_1_contig31941	s_1_1NewScaffoldedcontig_10926	28080
s_1_1_contig128783	s_1_1NewScaffoldedcontig_10928	24899
s_1_1_contig106576	s_1_1NewScaffoldedcontig_10935	1
s_1_1_contig153778	s_1_1NewScaffoldedcontig_10950	1
s_1_1_contig239324	s_1_1NewScaffoldedcontig_10952	2
s_1_1_contig150205	s_1_1NewScaffoldedcontig_10955	1
s_1_1_contig257483	s_1_1NewScaffoldedcontig_10957	1
s_1_1_contig222297	s_1_1NewScaffoldedcontig_10972	20308
s_1_1_contig146249	s_1_1NewScaffoldedcontig_10978	2473
s_1_1_contig185800	s_1_1NewScaffoldedcontig_10981	6712
s_1_1_contig213625	s_1_1NewScaffoldedcontig_10996	2502
s_1_1_contig157214	s_1_1NewScaffoldedcontig_11000	9010
s_1_1_contig133891	s_1_1NewScaffoldedcontig_11000	9924
s_1_1_contig282947	s_1_1NewScaffoldedcontig_11000	15035
s_1_1_contig153927	s_1_1NewScaffoldedcontig_11000	29201
s_1_1_contig256575	s_1_1NewScaffoldedcontig_11001	5919
s_1_1_contig81346	s_1_1NewScaffoldedcontig_11006	1
s_1_1_contig148016	s_1_1NewScaffoldedcontig_11006	3279
s_1_1_contig187197	s_1_1NewScaffoldedcontig_11014	1
s_1_1_contig222457	s_1_1NewScaffoldedcontig_11017	13391
s_1_1_contig239111	s_1_1NewScaffoldedcontig_11018	1
s_1_1_contig191060	s_1_1NewScaffoldedcontig_11020	23021
s_1_1_contig69840	s_1_1NewScaffoldedcontig_11025	1
s_1_1_contig165960	s_1_1NewScaffoldedcontig_11025	12224
s_1_1_contig190303	s_1_1NewScaffoldedcontig_11026	4015
s_1_1_contig190117	s_1_1NewScaffoldedcontig_11044	637
s_1_1_contig189172	s_1_1NewScaffoldedcontig_11044	739
s_1_1_contig212351	s_1_1NewScaffoldedcontig_11044	1719
s_1_1_contig249767	s_1_1NewScaffoldedcontig_11053	21824
[truncated: 22,402 more rows]

## Sheet: TableS3-C
Table S3-C Blastn	of Large	SMACv1.0 de novo Contigs Against The	Scaffolded Contigs (Top 3 Hits)
querydef SMACv1.0 de novo	querylen	hitid Scaffolded SMACv1.1 Scaffolded Contig	hitaccession	hitlen	hspnum	hspbitscore	hspscore	hspevalue	hspqueryfrom	hspqueryto	hsphitfrom	hsphitto	hspqueryframe	hsphitframe	hspidentty	hsppostive	hspgaps	hspalignlength
s_1_1_contig100002	8001	s_1_1NewScaffoldedcontig_31513	s_1_1NewScaffoldedcontig_31513	35979	1	73.4211	80	7.55e-10	3411	3460	24461	24510	1	1	46	46	0	50
s_1_1_contig100002	8001	s_1_1NewScaffoldedcontig_83475	s_1_1NewScaffoldedcontig_83475	12740	1	9481.6	10514	0	148	5410	3548	8811	1	1	5262	5262	1	5264
s_1_1_contig100002	8001	s_1_1NewScaffoldedcontig_182915	s_1_1NewScaffoldedcontig_182915	2747	1	4955.14	5494	0	5255	8001	1	2747	1	1	2747	2747	0	2747
s_1_1_contig100007	8969	s_1_1NewScaffoldedcontig_123777	s_1_1NewScaffoldedcontig_123777	4339	1	89.6514	98	1.1e-14	6414	6574	1512	1358	1	-1	118	118	6	161
s_1_1_contig100007	8969	s_1_1NewScaffoldedcontig_72446	s_1_1NewScaffoldedcontig_72446	1834	1	3294.24	3652	0	25	1861	1	1834	1	1	1833	1833	3	1837
s_1_1_contig100007	8969	s_1_1NewScaffoldedcontig_72447	s_1_1NewScaffoldedcontig_72447	26210	1	14837.6	16454	0	1	8227	19674	11448	1	-1	8227	8227	0	8227
s_1_1_contig100009	15111	s_1_1NewScaffoldedcontig_70926	s_1_1NewScaffoldedcontig_70926	38029	1	62.6008	68	2.58e-06	4558	4657	16528	16626	1	1	79	79	7	103
s_1_1_contig100009	15111	s_1_1NewScaffoldedcontig_32809	s_1_1NewScaffoldedcontig_32809	46599	1	27026.6	29972	0	2	14991	13938	28928	1	1	14990	14990	1	14991
s_1_1_contig100009	15111	s_1_1NewScaffoldedcontig_4267	s_1_1NewScaffoldedcontig_4267	37406	1	66.2076	72	2.12e-07	4558	4664	17367	17261	1	-1	81	81	2	108
s_1_1_contig100010	15547	s_1_1NewScaffoldedcontig_39326	s_1_1NewScaffoldedcontig_39326	16335	1	183.427	202	1.13e-42	7566	7805	794	526	1	-1	199	199	29	269
s_1_1_contig100010	15547	s_1_1NewScaffoldedcontig_7937	s_1_1NewScaffoldedcontig_7937	60320	1	14199.2	15746	0	7675	15547	18943	26815	1	1	7873	7873	0	7873
s_1_1_contig100010	15547	s_1_1NewScaffoldedcontig_59833	s_1_1NewScaffoldedcontig_59833	9545	1	187.033	206	9.26e-44	7566	7805	4090	3825	1	-1	200	200	28	267
s_1_1_contig100015	9807	s_1_1NewScaffoldedcontig_144333	s_1_1NewScaffoldedcontig_144333	2715	1	3591.79	3982	0	1	1991	20	2010	1	1	1991	1991	0	1991
s_1_1_contig100015	9807	s_1_1NewScaffoldedcontig_57026	s_1_1NewScaffoldedcontig_57026	41745	1	141.949	156	2.18e-30	1	91	9738	9828	1	1	86	86	0	91
s_1_1_contig100015	9807	s_1_1NewScaffoldedcontig_122856	s_1_1NewScaffoldedcontig_122856	18104	1	12745.7	14134	0	2718	9807	18104	11000	1	-1	7088	7088	15	7105
s_1_1_contig100017	8993	s_1_1NewScaffoldedcontig_62465	s_1_1NewScaffoldedcontig_62465	4184	1	7496.09	8312	0	3938	8100	4184	23	1	-1	4161	4161	1	4163
s_1_1_contig100017	8993	s_1_1NewScaffoldedcontig_6330	s_1_1NewScaffoldedcontig_6330	19972	1	356.55	394	5e-95	8591	8787	19972	19776	1	-1	197	197	0	197
s_1_1_contig100017	8993	s_1_1NewScaffoldedcontig_3161	s_1_1NewScaffoldedcontig_3161	91814	1	7056.07	7824	0	1	3912	3912	1	1	-1	3912	3912	0	3912
s_1_1_contig100023	11121	s_1_1NewScaffoldedcontig_84422	s_1_1NewScaffoldedcontig_84422	28820	1	15293.9	16960	0	884	9377	16216	24707	1	1	8489	8489	2	8494
s_1_1_contig100023	11121	s_1_1NewScaffoldedcontig_123308	s_1_1NewScaffoldedcontig_123308	2809	1	178.016	196	3.43e-41	11019	11121	2767	2665	1	-1	101	101	0	103
s_1_1_contig100023	11121	s_1_1NewScaffoldedcontig_97942	s_1_1NewScaffoldedcontig_97942	1563	1	2819.95	3126	0	9477	11039	1563	1	1	-1	1563	1563	0	1563
s_1_1_contig100025	14414	s_1_1NewScaffoldedcontig_40305	s_1_1NewScaffoldedcontig_40305	1253	1	2251.89	2496	0	12104	13356	1	1253	1	1	1251	1251	0	1253
s_1_1_contig100025	14414	s_1_1NewScaffoldedcontig_130675	s_1_1NewScaffoldedcontig_130675	1352	1	2439.44	2704	0	10729	12080	1	1352	1	1	1352	1352	0	1352
s_1_1_contig100025	14414	s_1_1NewScaffoldedcontig_40306	s_1_1NewScaffoldedcontig_40306	24164	1	25163.7	27906	0	457	14414	17213	3256	1	-1	13956	13956	0	13958
s_1_1_contig100031	9602	s_1_1NewScaffoldedcontig_33562	s_1_1NewScaffoldedcontig_33562	10912	1	170.803	188	4.39e-39	9501	9602	972	1073	1	1	99	99	0	102
s_1_1_contig100031	9602	s_1_1NewScaffoldedcontig_80838	s_1_1NewScaffoldedcontig_80838	3529	1	6358.16	7050	0	1	3525	3525	1	1	-1	3525	3525	0	3525
s_1_1_contig100031	9602	s_1_1NewScaffoldedcontig_43208	s_1_1NewScaffoldedcontig_43208	6111	1	10998.2	12196	0	3409	9518	6111	1	1	-1	6109	6109	3	6112
s_1_1_contig100039	11032	s_1_1NewScaffoldedcontig_106076	s_1_1NewScaffoldedcontig_106076	5494	1	6763.92	7500	0	7193	10945	3782	30	1	-1	3752	3752	0	3753
s_1_1_contig100039	11032	s_1_1NewScaffoldedcontig_19535	s_1_1NewScaffoldedcontig_19535	15191	1	12621.3	13996	0	194	7194	9341	2341	1	-1	7000	7000	0	7001
s_1_1_contig100039	11032	s_1_1NewScaffoldedcontig_66391	s_1_1NewScaffoldedcontig_66391	18003	1	392.617	434	8.52e-106	1	292	10	303	1	1	265	265	2	294
s_1_1_contig100044	14793	s_1_1NewScaffoldedcontig_131553	s_1_1NewScaffoldedcontig_131553	1924	1	3452.93	3828	0	10951	12873	1	1924	1	1	1921	1921	1	1924
s_1_1_contig100044	14793	s_1_1NewScaffoldedcontig_89175	s_1_1NewScaffoldedcontig_89175	23509	1	23423.4	25976	0	1744	14793	13064	32	1	-1	13025	13025	23	13053
s_1_1_contig100044	14793	s_1_1NewScaffoldedcontig_71627	s_1_1NewScaffoldedcontig_71627	785	1	152.769	168	1.82e-33	14679	14793	533	648	1	1	104	104	1	116
s_1_1_contig100045	12351	s_1_1NewScaffoldedcontig_60251	s_1_1NewScaffoldedcontig_60251	3275	1	91.4547	100	4.35e-15	7871	7925	1398	1344	1	-1	53	53	0	55
s_1_1_contig100045	12351	s_1_1NewScaffoldedcontig_73121	s_1_1NewScaffoldedcontig_73121	27133	1	14027.9	15556	0	4571	12351	9719	17499	1	1	7780	7780	0	7781
s_1_1_contig100045	12351	s_1_1NewScaffoldedcontig_89385	s_1_1NewScaffoldedcontig_89385	681	1	1119.37	1240	0	1	652	1	681	1	1	652	652	29	681
s_1_1_contig100046	10085	s_1_1NewScaffoldedcontig_28187	s_1_1NewScaffoldedcontig_28187	14876	1	134.736	148	3.32e-28	1	91	13573	13662	1	1	85	85	1	91
s_1_1_contig100046	10085	s_1_1NewScaffoldedcontig_117138	s_1_1NewScaffoldedcontig_117138	1267	1	138.342	152	2.73e-29	1	84	76	159	1	1	81	81	0	84
s_1_1_contig100046	10085	s_1_1NewScaffoldedcontig_14228	s_1_1NewScaffoldedcontig_14228	16433	1	18128.7	20104	0	1	10057	16152	6096	1	-1	10055	10055	0	10057
s_1_1_contig100048	8738	s_1_1NewScaffoldedcontig_132170	s_1_1NewScaffoldedcontig_132170	2615	1	4711.69	5224	0	41	2655	2615	1	1	-1	2614	2614	0	2615
s_1_1_contig100048	8738	s_1_1NewScaffoldedcontig_124163	s_1_1NewScaffoldedcontig_124163	761	1	122.112	134	1.81e-24	8663	8737	612	686	1	1	72	72	0	75
s_1_1_contig100048	8738	s_1_1NewScaffoldedcontig_46125	s_1_1NewScaffoldedcontig_46125	12308	1	11000	12198	0	2622	8738	7730	1614	1	-1	6110	6110	0	6117
s_1_1_contig100051	10771	s_1_1NewScaffoldedcontig_2377	s_1_1NewScaffoldedcontig_2377	3606	1	2738.8	3036	0	829	2350	3606	2084	1	-1	1522	1522	1	1523
s_1_1_contig100051	10771	s_1_1NewScaffoldedcontig_26028	s_1_1NewScaffoldedcontig_26028	14581	1	3645.89	4042	0	8730	10760	1	2036	1	1	2030	2030	5	2036
s_1_1_contig100051	10771	s_1_1NewScaffoldedcontig_185236	s_1_1NewScaffoldedcontig_185236	1680	1	2902.91	3218	0	6751	8397	1680	1	1	-1	1646	1646	33	1680
s_1_1_contig100052	12681	s_1_1NewScaffoldedcontig_3076	s_1_1NewScaffoldedcontig_3076	23328	1	20938.4	23220	0	1	11617	19294	7679	1	-1	11615	11615	1	11617
s_1_1_contig100052	12681	s_1_1NewScaffoldedcontig_73485	s_1_1NewScaffoldedcontig_73485	5427	1	73.4211	80	1.2e-09	12639	12681	2376	2334	1	-1	42	42	0	43
s_1_1_contig100052	12681	s_1_1NewScaffoldedcontig_176321	s_1_1NewScaffoldedcontig_176321	686	1	1232.99	1366	0	11574	12259	686	1	1	-1	685	685	0	686
s_1_1_contig100054	11726	s_1_1NewScaffoldedcontig_139098	s_1_1NewScaffoldedcontig_139098	810	1	55.3874	60	0.000297278	5424	5464	220	179	1	-1	38	38	1	42
s_1_1_contig100054	11726	s_1_1NewScaffoldedcontig_45198	s_1_1NewScaffoldedcontig_45198	24932	1	66.2076	72	1.64e-07	5407	5499	24509	24603	1	1	73	73	2	95
s_1_1_contig100054	11726	s_1_1NewScaffoldedcontig_37770	s_1_1NewScaffoldedcontig_37770	31003	1	20765.3	23028	0	213	11726	25285	13772	1	-1	11514	11514	0	11514
s_1_1_contig100063	8405	s_1_1NewScaffoldedcontig_46785	s_1_1NewScaffoldedcontig_46785	8119	1	203.264	224	6.5e-49	8256	8405	224	75	1	-1	135	135	0	150
s_1_1_contig100063	8405	s_1_1NewScaffoldedcontig_64570	s_1_1NewScaffoldedcontig_64570	9745	1	9182.24	10182	0	3305	8405	74	5173	1	1	5098	5098	1	5101
s_1_1_contig100063	8405	s_1_1NewScaffoldedcontig_18332	s_1_1NewScaffoldedcontig_18332	20155	1	4614.3	5116	0	1	2565	3058	492	1	-1	2564	2564	2	2567
s_1_1_contig100064	8365	s_1_1NewScaffoldedcontig_41621	s_1_1NewScaffoldedcontig_41621	1709	1	3077.83	3412	0	1	1709	1709	1	1	-1	1708	1708	0	1709
s_1_1_contig100064	8365	s_1_1NewScaffoldedcontig_164357	s_1_1NewScaffoldedcontig_164357	720	1	1299.71	1440	0	1785	2504	1	720	1	1	720	720	0	720
s_1_1_contig100064	8365	s_1_1NewScaffoldedcontig_41622	s_1_1NewScaffoldedcontig_41622	16279	1	14583.3	16172	0	1	8086	8194	16279	1	1	8086	8086	0	8086
s_1_1_contig100067	19768	s_1_1NewScaffoldedcontig_95566	s_1_1NewScaffoldedcontig_95566	1997	1	3602.61	3994	0	13826	15822	1	1997	1	1	1997	1997	0	1997
s_1_1_contig100067	19768	s_1_1NewScaffoldedcontig_55287	s_1_1NewScaffoldedcontig_55287	22345	1	15562.6	17258	0	10892	19528	168	8804	1	1	8634	8634	0	8637
s_1_1_contig100067	19768	s_1_1NewScaffoldedcontig_21201	s_1_1NewScaffoldedcontig_21201	9095	1	8520.4	9448	0	4482	9210	4057	8785	1	1	4727	4727	0	4729
s_1_1_contig100070	15790	s_1_1NewScaffoldedcontig_104807	s_1_1NewScaffoldedcontig_104807	2552	1	417.864	462	3.06e-113	4060	4561	1820	1307	1	-1	407	407	18	517
s_1_1_contig100070	15790	s_1_1NewScaffoldedcontig_53031	s_1_1NewScaffoldedcontig_53031	8371	1	15010.7	16646	0	7143	15474	39	8371	1	1	8330	8330	1	8333
s_1_1_contig100070	15790	s_1_1NewScaffoldedcontig_94089	s_1_1NewScaffoldedcontig_94089	7273	1	12713.2	14098	0	1	7059	7058	1	1	-1	7056	7056	1	7059
s_1_1_contig100075	9387	s_1_1NewScaffoldedcontig_109912	s_1_1NewScaffoldedcontig_109912	5113	1	49.9773	54	0.0101116	3024	3093	3695	3767	1	1	55	55	3	73
s_1_1_contig100075	9387	s_1_1NewScaffoldedcontig_19765	s_1_1NewScaffoldedcontig_19765	12568	1	51.7806	56	0.00289703	4253	4343	4514	4604	1	1	66	66	0	91
s_1_1_contig100075	9387	s_1_1NewScaffoldedcontig_39722	s_1_1NewScaffoldedcontig_39722	11585	1	12157.8	13482	0	1	6746	11585	4840	1	-1	6744	6744	0	6746
s_1_1_contig100082	10460	s_1_1NewScaffoldedcontig_158267	s_1_1NewScaffoldedcontig_158267	1952	1	2488.13	2758	0	1	1389	564	1952	1	1	1385	1385	0	1389
s_1_1_contig100082	10460	s_1_1NewScaffoldedcontig_134894	s_1_1NewScaffoldedcontig_134894	3459	1	3205.87	3554	0	7689	9465	2526	750	1	-1	1777	1777	0	1777
s_1_1_contig100082	10460	s_1_1NewScaffoldedcontig_26181	s_1_1NewScaffoldedcontig_26181	13947	1	9456.35	10486	0	1649	6895	5248	1	1	-1	5247	5247	1	5248
s_1_1_contig100086	8286	s_1_1NewScaffoldedcontig_71000	s_1_1NewScaffoldedcontig_71000	20294	1	14769.1	16378	0	1	8286	11999	20294	1	1	8244	8244	10	8296
s_1_1_contig100086	8286	s_1_1NewScaffoldedcontig_5728	s_1_1NewScaffoldedcontig_5728	41409	1	49.9773	54	0.00892118	8211	8245	3475	3509	1	1	32	32	0	35
s_1_1_contig100086	8286	s_1_1NewScaffoldedcontig_171405	s_1_1NewScaffoldedcontig_171405	599	1	49.9773	54	0.00892118	206	237	562	593	1	1	30	30	0	32
s_1_1_contig100087	10849	s_1_1NewScaffoldedcontig_68264	s_1_1NewScaffoldedcontig_68264	9845	1	49.9773	54	0.0116924	2994	3039	2008	2050	1	1	39	39	3	46
s_1_1_contig100087	10849	s_1_1NewScaffoldedcontig_6216	s_1_1NewScaffoldedcontig_6216	55167	1	53.584	58	0.000959767	6530	6590	46910	46972	1	1	51	51	2	63
s_1_1_contig100087	10849	s_1_1NewScaffoldedcontig_4442	s_1_1NewScaffoldedcontig_4442	22971	1	11389.6	12630	0	4535	10849	7155	13469	1	1	6315	6315	0	6315
s_1_1_contig100088	8253	s_1_1NewScaffoldedcontig_126684	s_1_1NewScaffoldedcontig_126684	2586	1	51.7806	56	0.00254574	3340	3389	2309	2357	1	1	42	42	1	50
s_1_1_contig100088	8253	s_1_1NewScaffoldedcontig_25442	s_1_1NewScaffoldedcontig_25442	7221	1	12924.2	14332	0	1038	8237	7221	1	1	-1	7198	7198	21	7221
s_1_1_contig100088	8253	s_1_1NewScaffoldedcontig_25488	s_1_1NewScaffoldedcontig_25488	14007	1	1458.41	1616	0	91	898	808	1	1	-1	808	808	0	808
s_1_1_contig100089	12900	s_1_1NewScaffoldedcontig_3037	s_1_1NewScaffoldedcontig_3037	41421	1	64.4042	70	6.32e-07	1	35	1347	1381	1	1	35	35	0	35
s_1_1_contig100089	12900	s_1_1NewScaffoldedcontig_6402	s_1_1NewScaffoldedcontig_6402	16382	1	22509.1	24962	0	1	12486	16200	3715	1	-1	12484	12484	0	12486
s_1_1_contig100089	12900	s_1_1NewScaffoldedcontig_170255	s_1_1NewScaffoldedcontig_170255	845	1	58.9941	64	2.69e-05	3	34	807	776	1	-1	32	32	0	32
s_1_1_contig100092	8187	s_1_1NewScaffoldedcontig_117198	s_1_1NewScaffoldedcontig_117198	2113	1	3802.79	4216	0	4447	6558	1	2113	1	1	2112	2112	1	2113
s_1_1_contig100092	8187	s_1_1NewScaffoldedcontig_174000	s_1_1NewScaffoldedcontig_174000	582	1	706.404	782	0	1	391	1	391	1	1	391	391	0	391
s_1_1_contig100092	8187	s_1_1NewScaffoldedcontig_23222	s_1_1NewScaffoldedcontig_23222	29488	1	6378	7072	0	512	4047	12813	16348	1	1	3536	3536	0	3536
s_1_1_contig100103	9907	s_1_1NewScaffoldedcontig_99507	s_1_1NewScaffoldedcontig_99507	3669	1	6612.44	7332	0	2781	6449	1	3669	1	1	3668	3668	0	3669
s_1_1_contig100103	9907	s_1_1NewScaffoldedcontig_742	s_1_1NewScaffoldedcontig_742	31332	1	15167.6	16820	0	1	8423	22901	31323	1	1	8418	8418	0	8423
s_1_1_contig100103	9907	s_1_1NewScaffoldedcontig_153530	s_1_1NewScaffoldedcontig_153530	868	1	1434.96	1590	0	9075	9907	1	868	1	1	833	833	35	868
s_1_1_contig100104	10327	s_1_1NewScaffoldedcontig_39010	s_1_1NewScaffoldedcontig_39010	22259	1	15391.2	17068	0	1	8563	13695	22259	1	1	8559	8559	8	8568
s_1_1_contig100104	10327	s_1_1NewScaffoldedcontig_73315	s_1_1NewScaffoldedcontig_73315	7412	1	3335.72	3698	0	8479	10327	7412	5564	1	-1	1849	1849	0	1849
s_1_1_contig100104	10327	s_1_1NewScaffoldedcontig_136162	s_1_1NewScaffoldedcontig_136162	568	1	147.359	162	5.39e-32	1819	1995	356	533	1	1	140	140	1	178
s_1_1_contig100110	9171	s_1_1NewScaffoldedcontig_10644	s_1_1NewScaffoldedcontig_10644	38341	1	15558.9	17254	0	1	8640	35697	27058	1	-1	8635	8635	0	8640
s_1_1_contig100110	9171	s_1_1NewScaffoldedcontig_20073	s_1_1NewScaffoldedcontig_20073	14661	1	187.033	206	5.45e-44	1788	2019	8607	8839	1	1	183	183	3	234
s_1_1_contig100110	9171	s_1_1NewScaffoldedcontig_145050	s_1_1NewScaffoldedcontig_145050	3572	1	6374.39	7068	0	2867	6456	1	3572	1	1	3566	3566	18	3590
s_1_1_contig100116	13343	s_1_1NewScaffoldedcontig_7450	s_1_1NewScaffoldedcontig_7450	47953	1	118.505	130	3.38e-23	1	75	4237	4163	1	-1	71	71	0	75
s_1_1_contig100116	13343	s_1_1NewScaffoldedcontig_175263	s_1_1NewScaffoldedcontig_175263	549	1	372.78	412	9.65e-100	5464	5669	1	206	1	1	206	206	0	206
s_1_1_contig100116	13343	s_1_1NewScaffoldedcontig_22067	s_1_1NewScaffoldedcontig_22067	22214	1	8863.04	9828	0	54	4970	22214	17298	1	-1	4916	4916	0	4917
s_1_1_contig100120	12387	s_1_1NewScaffoldedcontig_90011	s_1_1NewScaffoldedcontig_90011	2227	1	3972.3	4404	0	9413	11643	2219	1	1	-1	2218	2218	12	2231
s_1_1_contig100120	12387	s_1_1NewScaffoldedcontig_39146	s_1_1NewScaffoldedcontig_39146	4878	1	8798.12	9756	0	1	4878	4878	1	1	-1	4878	4878	0	4878
s_1_1_contig100120	12387	s_1_1NewScaffoldedcontig_2043	s_1_1NewScaffoldedcontig_2043	45147	1	13376.9	14834	0	4971	12387	1	7417	1	1	7417	7417	0	7417
s_1_1_contig100123	10923	s_1_1NewScaffoldedcontig_6624	s_1_1NewScaffoldedcontig_6624	19830	1	8046.11	8922	0	6247	10714	19830	15364	1	-1	4466	4466	1	4468
s_1_1_contig100123	10923	s_1_1NewScaffoldedcontig_1937	s_1_1NewScaffoldedcontig_1937	5771	1	9607.83	10654	0	1	5327	427	5753	1	1	5327	5327	0	5327
s_1_1_contig100123	10923	s_1_1NewScaffoldedcontig_144347	s_1_1NewScaffoldedcontig_144347	726	1	1310.53	1452	0	5304	6029	1	726	1	1	726	726	0	726
s_1_1_contig100126	11836	s_1_1NewScaffoldedcontig_49963	s_1_1NewScaffoldedcontig_49963	25525	1	181.623	200	3e-42	10596	10720	9995	9871	1	-1	115	115	0	125
s_1_1_contig100126	11836	s_1_1NewScaffoldedcontig_18540	s_1_1NewScaffoldedcontig_18540	30177	1	19374.9	21486	0	1	10755	17748	28506	1	1	10753	10753	4	10759
s_1_1_contig100126	11836	s_1_1NewScaffoldedcontig_69192	s_1_1NewScaffoldedcontig_69192	18220	1	181.623	200	3e-42	10596	10720	1422	1298	1	-1	115	115	0	125
s_1_1_contig100127	12086	s_1_1NewScaffoldedcontig_179171	s_1_1NewScaffoldedcontig_179171	643	1	1155.44	1280	0	6117	6759	643	1	1	-1	642	642	0	643
s_1_1_contig100127	12086	s_1_1NewScaffoldedcontig_27817	s_1_1NewScaffoldedcontig_27817	22823	1	9609.64	10656	0	6749	12086	14764	9427	1	-1	5334	5334	0	5338
s_1_1_contig100127	12086	s_1_1NewScaffoldedcontig_99555	s_1_1NewScaffoldedcontig_99555	657	1	1159.05	1284	0	6101	6757	1	657	1	1	651	651	0	657
s_1_1_contig100128	12367	s_1_1NewScaffoldedcontig_106942	s_1_1NewScaffoldedcontig_106942	7079	1	12594.2	13966	0	5148	12230	7079	1	1	-1	7037	7037	6	7084
s_1_1_contig100128	12367	s_1_1NewScaffoldedcontig_85110	s_1_1NewScaffoldedcontig_85110	5167	1	9301.26	10314	0	1	5167	5167	1	1	-1	5163	5163	0	5167
s_1_1_contig100128	12367	s_1_1NewScaffoldedcontig_110897	s_1_1NewScaffoldedcontig_110897	12891	1	443.112	490	6.02e-121	5459	5898	2090	1605	1	-1	385	385	50	488
s_1_1_contig100129	8314	s_1_1NewScaffoldedcontig_91005	s_1_1NewScaffoldedcontig_91005	18844	1	55.3874	60	0.000210518	8056	8154	12763	12860	1	1	78	78	9	103
s_1_1_contig100129	8314	s_1_1NewScaffoldedcontig_27217	s_1_1NewScaffoldedcontig_27217	32731	1	14662.7	16260	0	16	8150	10047	18181	1	1	8133	8133	0	8135
s_1_1_contig100129	8314	s_1_1NewScaffoldedcontig_49019	s_1_1NewScaffoldedcontig_49019	9285	1	53.584	58	0.00073478	3310	3381	8411	8340	1	-1	55	55	0	72
s_1_1_contig100132	10257	s_1_1NewScaffoldedcontig_7667	s_1_1NewScaffoldedcontig_7667	31388	1	60.7975	66	6.11e-06	10000	10057	18616	18559	1	-1	48	48	0	58
s_1_1_contig100132	10257	s_1_1NewScaffoldedcontig_23684	s_1_1NewScaffoldedcontig_23684	31923	1	8790.91	9748	0	1	4874	14720	9847	1	-1	4874	4874	0	4874
s_1_1_contig100132	10257	s_1_1NewScaffoldedcontig_54327	s_1_1NewScaffoldedcontig_54327	9897	1	62.6008	68	1.75e-06	7316	7454	3000	2865	1	-1	99	99	7	141
s_1_1_contig100134	9359	s_1_1NewScaffoldedcontig_4047	s_1_1NewScaffoldedcontig_4047	33799	1	167.196	184	5.21e-38	1	110	14034	13925	1	-1	103	103	0	110
s_1_1_contig100134	9359	s_1_1NewScaffoldedcontig_115735	s_1_1NewScaffoldedcontig_115735	6802	1	167.196	184	5.21e-38	1	107	181	75	1	-1	101	101	0	107
s_1_1_contig100134	9359	s_1_1NewScaffoldedcontig_42426	s_1_1NewScaffoldedcontig_42426	59306	1	16770.8	18598	0	61	9359	18698	27996	1	1	9299	9299	0	9299
s_1_1_contig100148	8525	s_1_1NewScaffoldedcontig_101435	s_1_1NewScaffoldedcontig_101435	1395	1	2239.27	2482	0	510	1750	1241	1	1	-1	1241	1241	0	1241
s_1_1_contig100148	8525	s_1_1NewScaffoldedcontig_14754	s_1_1NewScaffoldedcontig_14754	8082	1	416.061	460	5.76e-113	1657	1993	5454	5109	1	-1	302	302	9	346
s_1_1_contig100148	8525	s_1_1NewScaffoldedcontig_21095	s_1_1NewScaffoldedcontig_21095	6164	1	11070.4	12276	0	1839	7987	6164	15	1	-1	6146	6146	1	6150
s_1_1_contig100153	10454	s_1_1NewScaffoldedcontig_18039	s_1_1NewScaffoldedcontig_18039	3972	1	7079.51	7850	0	6468	10406	5	3947	1	1	3939	3939	4	3943
s_1_1_contig100153	10454	s_1_1NewScaffoldedcontig_17270	s_1_1NewScaffoldedcontig_17270	14332	1	11755.6	13036	0	324	6862	6540	1	1	-1	6534	6534	3	6541
s_1_1_contig100153	10454	s_1_1NewScaffoldedcontig_82491	s_1_1NewScaffoldedcontig_82491	541	1	93.2581	102	1.05e-15	10386	10454	336	260	1	-1	67	67	8	77
s_1_1_contig100160	8928	s_1_1NewScaffoldedcontig_23045	s_1_1NewScaffoldedcontig_23045	60906	1	16092.7	17846	0	1	8928	23187	32113	1	1	8927	8927	1	8928
s_1_1_contig100160	8928	s_1_1NewScaffoldedcontig_111457	s_1_1NewScaffoldedcontig_111457	5511	1	49.9773	54	0.00961533	7469	7495	4798	4772	1	-1	27	27	0	27
s_1_1_contig100160	8928	s_1_1NewScaffoldedcontig_30086	s_1_1NewScaffoldedcontig_30086	29697	1	51.7806	56	0.00275484	1803	1860	16177	16234	1	1	46	46	0	58
s_1_1_contig100169	8363	s_1_1NewScaffoldedcontig_29778	s_1_1NewScaffoldedcontig_29778	12976	1	1141.02	1264	0	97	781	12268	12976	1	1	677	677	40	717
s_1_1_contig100169	8363	s_1_1NewScaffoldedcontig_126983	s_1_1NewScaffoldedcontig_126983	1873	1	340.32	376	3.57e-90	8132	8363	296	68	1	-1	216	216	3	232
s_1_1_contig100169	8363	s_1_1NewScaffoldedcontig_940	s_1_1NewScaffoldedcontig_940	9871	1	13308.3	14758	0	758	8140	1	7384	1	1	7383	7383	1	7384
s_1_1_contig100171	13859	s_1_1NewScaffoldedcontig_14759	s_1_1NewScaffoldedcontig_14759	93827	1	93.2581	102	1.4e-15	3013	3218	75387	75166	1	-1	160	160	20	224
s_1_1_contig100171	13859	s_1_1NewScaffoldedcontig_59345	s_1_1NewScaffoldedcontig_59345	10761	1	91.4547	100	4.88e-15	3043	3347	3238	2927	1	-1	219	219	27	322
s_1_1_contig100171	13859	s_1_1NewScaffoldedcontig_8602	s_1_1NewScaffoldedcontig_8602	37204	1	22729.1	25206	0	24	12631	5207	17813	1	1	12607	12607	1	12608
s_1_1_contig100172	15613	s_1_1NewScaffoldedcontig_26338	s_1_1NewScaffoldedcontig_26338	27537	1	15169.4	16822	0	5524	13949	14016	5591	1	-1	8420	8420	0	8426
s_1_1_contig100172	15613	s_1_1NewScaffoldedcontig_1420	s_1_1NewScaffoldedcontig_1420	4014	1	251.955	278	2.66e-63	4430	4621	3175	2977	1	-1	178	178	9	200
s_1_1_contig100172	15613	s_1_1NewScaffoldedcontig_79227	s_1_1NewScaffoldedcontig_79227	1664	1	2895.69	3210	0	14006	15613	1	1608	1	1	1607	1607	0	1608
s_1_1_contig100174	12928	s_1_1NewScaffoldedcontig_7212	s_1_1NewScaffoldedcontig_7212	22685	1	22056.5	24460	0	1	12241	17884	5644	1	-1	12239	12239	2	12242
s_1_1_contig100174	12928	s_1_1NewScaffoldedcontig_152458	s_1_1NewScaffoldedcontig_152458	6145	1	57.1907	62	9.39e-05	12197	12292	817	906	1	1	73	73	6	96
s_1_1_contig100174	12928	s_1_1NewScaffoldedcontig_50294	s_1_1NewScaffoldedcontig_50294	1990	1	60.7975	66	7.71e-06	12194	12251	1566	1622	1	1	49	49	1	58
s_1_1_contig100175	9643	s_1_1NewScaffoldedcontig_53553	s_1_1NewScaffoldedcontig_53553	17050	1	14624.8	16218	0	1513	9631	15200	7080	1	-1	8117	8117	2	8121
s_1_1_contig100175	9643	s_1_1NewScaffoldedcontig_101144	s_1_1NewScaffoldedcontig_101144	5415	1	107.685	118	4.41e-20	2671	2729	88	30	1	-1	59	59	0	59
s_1_1_contig100175	9643	s_1_1NewScaffoldedcontig_64812	s_1_1NewScaffoldedcontig_64812	10983	1	107.685	118	4.41e-20	2671	2729	1265	1207	1	-1	59	59	0	59
s_1_1_contig100177	10671	s_1_1NewScaffoldedcontig_84634	s_1_1NewScaffoldedcontig_84634	6582	1	6870.32	7618	0	1	3816	3817	3	1	-1	3814	3814	1	3816
s_1_1_contig100177	10671	s_1_1NewScaffoldedcontig_35555	s_1_1NewScaffoldedcontig_35555	12646	1	8100.22	8982	0	3949	8454	1	4508	1	1	4503	4503	4	4509
s_1_1_contig100177	10671	s_1_1NewScaffoldedcontig_9625	s_1_1NewScaffoldedcontig_9625	41612	1	343.926	380	3.74e-91	3632	3974	27495	27837	1	1	284	284	2	344
s_1_1_contig100182	9043	s_1_1NewScaffoldedcontig_41053	s_1_1NewScaffoldedcontig_41053	4649	1	8282.36	9184	0	2448	7120	1	4649	1	1	4637	4637	24	4673
s_1_1_contig100182	9043	s_1_1NewScaffoldedcontig_43699	s_1_1NewScaffoldedcontig_43699	16542	1	529.673	586	3.85e-147	18	310	293	1	1	-1	293	293	0	293
s_1_1_contig100182	9043	s_1_1NewScaffoldedcontig_41054	s_1_1NewScaffoldedcontig_41054	41430	1	14008.1	15534	0	1187	9037	40229	32387	1	-1	7821	7821	34	7864
s_1_1_contig100183	17278	s_1_1NewScaffoldedcontig_6496	s_1_1NewScaffoldedcontig_6496	43776	1	49.9773	54	0.0186395	10762	10806	43394	43438	1	1	38	38	0	45
s_1_1_contig100183	17278	s_1_1NewScaffoldedcontig_374	s_1_1NewScaffoldedcontig_374	1764	1	49.9773	54	0.0186395	5774	5818	776	820	1	1	38	38	0	45
s_1_1_contig100183	17278	s_1_1NewScaffoldedcontig_5155	s_1_1NewScaffoldedcontig_5155	16857	1	22574.1	25034	0	4494	17026	12554	22	1	-1	12529	12529	2	12534
s_1_1_contig100186	8371	s_1_1NewScaffoldedcontig_22109	s_1_1NewScaffoldedcontig_22109	87802	1	48.1739	52	0.0314588	7704	7757	32933	32986	1	1	43	43	0	54
s_1_1_contig100186	8371	s_1_1NewScaffoldedcontig_160709	s_1_1NewScaffoldedcontig_160709	686	1	845.263	936	0	7726	8193	686	219	1	-1	468	468	0	468
s_1_1_contig100186	8371	s_1_1NewScaffoldedcontig_25466	s_1_1NewScaffoldedcontig_25466	43012	1	8711.56	9660	0	2919	7748	9391	4562	1	-1	4830	4830	0	4830
s_1_1_contig100188	9617	s_1_1NewScaffoldedcontig_22786	s_1_1NewScaffoldedcontig_22786	14028	1	7528.55	8348	0	5416	9598	9570	5387	1	-1	4181	4181	1	4184
s_1_1_contig100188	9617	s_1_1NewScaffoldedcontig_81383	s_1_1NewScaffoldedcontig_81383	15039	1	53.584	58	0.000850424	932	965	12456	12423	1	-1	32	32	0	34
s_1_1_contig100188	9617	s_1_1NewScaffoldedcontig_136805	s_1_1NewScaffoldedcontig_136805	947	1	1701.86	1886	0	2	949	1	947	1	1	947	947	1	948
s_1_1_contig100189	8303	s_1_1NewScaffoldedcontig_115	s_1_1NewScaffoldedcontig_115	61650	1	48.1739	52	0.0312021	3771	3806	60225	60190	1	-1	32	32	0	36
s_1_1_contig100189	8303	s_1_1NewScaffoldedcontig_161025	s_1_1NewScaffoldedcontig_161025	1540	1	46.3705	50	0.108906	1342	1389	1124	1074	1	-1	41	41	3	51
s_1_1_contig100189	8303	s_1_1NewScaffoldedcontig_35637	s_1_1NewScaffoldedcontig_35637	22656	1	7115.58	7890	0	550	4494	8183	12127	1	1	3945	3945	0	3945
s_1_1_contig100191	8552	s_1_1NewScaffoldedcontig_52471	s_1_1NewScaffoldedcontig_52471	3205	1	5710.75	6332	0	1	3166	40	3205	1	1	3166	3166	0	3166
s_1_1_contig100191	8552	s_1_1NewScaffoldedcontig_71391	s_1_1NewScaffoldedcontig_71391	9740	1	9719.64	10778	0	3149	8537	9740	4352	1	-1	5389	5389	0	5389
s_1_1_contig100191	8552	s_1_1NewScaffoldedcontig_75727	s_1_1NewScaffoldedcontig_75727	10693	1	188.837	208	1.46e-44	3034	3171	6469	6326	1	-1	129	129	6	144
s_1_1_contig100194	8569	s_1_1NewScaffoldedcontig_6044	s_1_1NewScaffoldedcontig_6044	35340	1	15445.3	17128	0	1	8569	15749	24317	1	1	8567	8567	0	8569
s_1_1_contig100194	8569	s_1_1NewScaffoldedcontig_46273	s_1_1NewScaffoldedcontig_46273	3292	1	174.41	192	3.21e-40	5515	5638	1217	1340	1	1	113	113	0	124
s_1_1_contig100194	8569	s_1_1NewScaffoldedcontig_17303	s_1_1NewScaffoldedcontig_17303	8063	1	176.213	194	9.21e-41	5515	5638	5622	5500	1	-1	114	114	1	124
s_1_1_contig100195	9968	s_1_1NewScaffoldedcontig_167559	s_1_1NewScaffoldedcontig_167559	1210	1	2152.71	2386	0	1	1212	1	1210	1	1	1208	1208	4	1213
s_1_1_contig100195	9968	s_1_1NewScaffoldedcontig_58922	s_1_1NewScaffoldedcontig_58922	10968	1	277.202	306	4.26e-71	9309	9856	8548	7985	1	-1	419	419	70	591
s_1_1_contig100195	9968	s_1_1NewScaffoldedcontig_25971	s_1_1NewScaffoldedcontig_25971	34867	1	14174	15718	0	2085	9958	30933	23063	1	-1	7868	7868	3	7874
s_1_1_contig100196	8839	s_1_1NewScaffoldedcontig_43700	s_1_1NewScaffoldedcontig_43700	24342	1	233.921	258	4.04e-58	5955	6136	21471	21652	1	1	161	161	0	182
s_1_1_contig100196	8839	s_1_1NewScaffoldedcontig_126686	s_1_1NewScaffoldedcontig_126686	1236	1	233.921	258	4.04e-58	5950	6136	1	200	1	1	171	171	13	200
s_1_1_contig100196	8839	s_1_1NewScaffoldedcontig_12264	s_1_1NewScaffoldedcontig_12264	24268	1	13546.4	15022	0	1	7541	1	7566	1	1	7540	7540	25	7566
s_1_1_contig100198	9411	s_1_1NewScaffoldedcontig_130886	s_1_1NewScaffoldedcontig_130886	3462	1	120.309	132	6.82e-24	3481	3558	1910	1989	1	1	76	76	2	80
s_1_1_contig100198	9411	s_1_1NewScaffoldedcontig_17403	s_1_1NewScaffoldedcontig_17403	20849	1	9203.88	10206	0	4293	9411	15734	20849	1	1	5114	5114	3	5119
s_1_1_contig100198	9411	s_1_1NewScaffoldedcontig_79104	s_1_1NewScaffoldedcontig_79104	21218	1	120.309	132	6.82e-24	3480	3562	16670	16586	1	-1	79	79	2	85
s_1_1_contig100202	12672	s_1_1NewScaffoldedcontig_35102	s_1_1NewScaffoldedcontig_35102	29455	1	150.966	166	5.43e-33	5972	6089	9011	9128	1	1	104	104	0	118
s_1_1_contig100202	12672	s_1_1NewScaffoldedcontig_6996	s_1_1NewScaffoldedcontig_6996	19237	1	22839.1	25328	0	9	12672	19069	6406	1	-1	12664	12664	0	12664
s_1_1_contig100202	12672	s_1_1NewScaffoldedcontig_5154	s_1_1NewScaffoldedcontig_5154	65934	1	145.556	160	2.31e-31	5971	6083	18658	18546	1	-1	100	100	0	113
s_1_1_contig100205	8481	s_1_1NewScaffoldedcontig_20233	s_1_1NewScaffoldedcontig_20233	29614	1	53.584	58	0.000749602	8221	8277	29500	29444	1	-1	46	46	0	57
s_1_1_contig100205	8481	s_1_1NewScaffoldedcontig_64102	s_1_1NewScaffoldedcontig_64102	9359	1	53.584	58	0.000749602	8221	8277	9123	9067	1	-1	46	46	0	57
s_1_1_contig100205	8481	s_1_1NewScaffoldedcontig_4629	s_1_1NewScaffoldedcontig_4629	61404	1	14008.1	15534	0	715	8481	22763	30529	1	1	7767	7767	0	7767
s_1_1_contig100208	9070	s_1_1NewScaffoldedcontig_1224	s_1_1NewScaffoldedcontig_1224	42303	1	104.078	114	5.06e-19	7869	8102	22615	22845	1	1	167	167	5	235
s_1_1_contig100208	9070	s_1_1NewScaffoldedcontig_16572	s_1_1NewScaffoldedcontig_16572	33894	1	71.6177	78	2.99e-09	8162	8328	21796	21621	1	-1	126	126	15	179
s_1_1_contig100208	9070	s_1_1NewScaffoldedcontig_2168	s_1_1NewScaffoldedcontig_2168	43129	1	9335.52	10352	0	1	5188	43129	37944	1	-1	5185	5185	2	5188
s_1_1_contig100215	16731	s_1_1NewScaffoldedcontig_76990	s_1_1NewScaffoldedcontig_76990	1396	1	158.179	174	4.83e-35	1719	1878	79	238	1	1	131	131	0	160
s_1_1_contig100215	16731	s_1_1NewScaffoldedcontig_46699	s_1_1NewScaffoldedcontig_46699	18410	1	29760.5	33004	0	130	16728	16632	1	1	-1	16574	16574	33	16632
s_1_1_contig100215	16731	s_1_1NewScaffoldedcontig_91454	s_1_1NewScaffoldedcontig_91454	2013	1	3631.47	4026	0	12950	14962	2013	1	1	-1	2013	2013	0	2013
s_1_1_contig100217	8575	s_1_1NewScaffoldedcontig_29301	s_1_1NewScaffoldedcontig_29301	2101	1	190.64	210	4.18e-45	8463	8575	2088	1976	1	-1	110	110	0	113
s_1_1_contig100217	8575	s_1_1NewScaffoldedcontig_72913	s_1_1NewScaffoldedcontig_72913	16326	1	15353.4	17026	0	1	8537	8553	1	1	-1	8535	8535	16	8553
s_1_1_contig100217	8575	s_1_1NewScaffoldedcontig_150034	s_1_1NewScaffoldedcontig_150034	1058	1	190.64	210	4.18e-45	8463	8575	907	795	1	-1	110	110	0	113
s_1_1_contig100218	16943	s_1_1NewScaffoldedcontig_8099	s_1_1NewScaffoldedcontig_8099	22986	1	26211.4	29068	0	2395	16943	8439	22986	1	1	14544	14544	1	14549
s_1_1_contig100218	16943	s_1_1NewScaffoldedcontig_116116	s_1_1NewScaffoldedcontig_116116	2609	1	4392.49	4870	0	1	2454	135	2602	1	1	2453	2453	14	2468
s_1_1_contig100218	16943	s_1_1NewScaffoldedcontig_4449	s_1_1NewScaffoldedcontig_4449	58190	1	244.741	270	4.29e-61	3534	3734	51225	51029	1	-1	176	176	4	201
s_1_1_contig100219	10665	s_1_1NewScaffoldedcontig_73100	s_1_1NewScaffoldedcontig_73100	20970	1	12202.9	13532	0	1	6814	20970	14158	1	-1	6797	6797	3	6815
s_1_1_contig100219	10665	s_1_1NewScaffoldedcontig_46633	s_1_1NewScaffoldedcontig_46633	35381	1	96.8649	106	8.83e-17	10593	10665	34455	34383	1	-1	65	65	0	73
s_1_1_contig100219	10665	s_1_1NewScaffoldedcontig_108106	s_1_1NewScaffoldedcontig_108106	2815	1	96.8649	106	8.83e-17	10590	10665	2596	2671	1	1	67	67	0	76
s_1_1_contig100221	9529	s_1_1NewScaffoldedcontig_2546	s_1_1NewScaffoldedcontig_2546	23857	1	62.6008	68	1.63e-06	7176	7335	4089	3926	1	-1	119	119	10	167
s_1_1_contig100221	9529	s_1_1NewScaffoldedcontig_33714	s_1_1NewScaffoldedcontig_33714	35151	1	48.1739	52	0.0358289	1986	2032	33582	33628	1	1	41	41	2	48
s_1_1_contig100221	9529	s_1_1NewScaffoldedcontig_40825	s_1_1NewScaffoldedcontig_40825	26285	1	10652	11812	0	2580	8499	5918	1	1	-1	5915	5915	2	5920
s_1_1_contig100223	9456	s_1_1NewScaffoldedcontig_89633	s_1_1NewScaffoldedcontig_89633	5928	1	73.4211	80	8.93e-10	9412	9456	1558	1514	1	-1	43	43	0	45
s_1_1_contig100223	9456	s_1_1NewScaffoldedcontig_26207	s_1_1NewScaffoldedcontig_26207	18940	1	75.2244	82	2.56e-10	9410	9455	15558	15603	1	1	44	44	0	46
s_1_1_contig100223	9456	s_1_1NewScaffoldedcontig_26943	s_1_1NewScaffoldedcontig_26943	11650	1	15037.8	16676	0	899	9247	8352	1	1	-1	8348	8348	3	8352
s_1_1_contig100225	8294	s_1_1NewScaffoldedcontig_3595	s_1_1NewScaffoldedcontig_3595	93613	1	12518.5	13882	0	1354	8294	86673	93613	1	1	6941	6941	0	6941
s_1_1_contig100225	8294	s_1_1NewScaffoldedcontig_19071	s_1_1NewScaffoldedcontig_19071	15989	1	271.792	300	1.51e-69	6232	6443	13203	13412	1	1	190	190	4	213
s_1_1_contig100225	8294	s_1_1NewScaffoldedcontig_42261	s_1_1NewScaffoldedcontig_42261	6905	1	264.578	292	2.24e-67	6233	6445	6188	6401	1	1	190	190	5	216
s_1_1_contig100227	8492	s_1_1NewScaffoldedcontig_72841	s_1_1NewScaffoldedcontig_72841	14078	1	325.893	360	7.99e-86	5860	6121	11451	11189	1	-1	233	233	3	264
s_1_1_contig100227	8492	s_1_1NewScaffoldedcontig_46211	s_1_1NewScaffoldedcontig_46211	17056	1	6726.05	7458	0	1	3729	12997	16725	1	1	3729	3729	0	3729
s_1_1_contig100227	8492	s_1_1NewScaffoldedcontig_94685	s_1_1NewScaffoldedcontig_94685	6732	1	4527.74	5020	0	5973	8492	5263	2742	1	-1	2519	2519	2	2522
s_1_1_contig100228	12856	s_1_1NewScaffoldedcontig_143588	s_1_1NewScaffoldedcontig_143588	3549	1	49.9773	54	0.0138624	3968	4007	1462	1501	1	1	35	35	0	40
s_1_1_contig100228	12856	s_1_1NewScaffoldedcontig_65769	s_1_1NewScaffoldedcontig_65769	12874	1	4901.04	5434	0	10125	12856	12723	9982	1	-1	2731	2731	10	2742
s_1_1_contig100228	12856	s_1_1NewScaffoldedcontig_42474	s_1_1NewScaffoldedcontig_42474	11460	1	18065.6	20034	0	404	10420	10017	1	1	-1	10017	10017	0	10017
s_1_1_contig100229	11810	s_1_1NewScaffoldedcontig_36249	s_1_1NewScaffoldedcontig_36249	13863	1	10954.9	12148	0	29	6105	4919	10995	1	1	6076	6076	0	6077
s_1_1_contig100229	11810	s_1_1NewScaffoldedcontig_125611	s_1_1NewScaffoldedcontig_125611	754	1	95.0615	104	3.41e-16	1	55	84	30	1	-1	54	54	0	55
s_1_1_contig100229	11810	s_1_1NewScaffoldedcontig_101742	s_1_1NewScaffoldedcontig_101742	5434	1	9791.78	10858	0	6378	11810	5434	1	1	-1	5433	5433	1	5434
s_1_1_contig100230	8741	s_1_1NewScaffoldedcontig_39643	s_1_1NewScaffoldedcontig_39643	29363	1	9523.07	10560	0	3349	8631	5283	1	1	-1	5282	5282	0	5283
s_1_1_contig100230	8741	s_1_1NewScaffoldedcontig_74319	s_1_1NewScaffoldedcontig_74319	5865	1	46.3705	50	0.114676	7829	7853	4255	4279	1	1	25	25	0	25
s_1_1_contig100230	8741	s_1_1NewScaffoldedcontig_84431	s_1_1NewScaffoldedcontig_84431	10073	1	46.3705	50	0.114676	8634	8668	5619	5653	1	1	31	31	0	35
s_1_1_contig100235	11048	s_1_1NewScaffoldedcontig_33072	s_1_1NewScaffoldedcontig_33072	38531	1	19108	21190	0	1	10603	26509	37111	1	1	10600	10600	0	10603
s_1_1_contig100235	11048	s_1_1NewScaffoldedcontig_59400	s_1_1NewScaffoldedcontig_59400	3848	1	502.623	556	6.55e-139	9882	10675	2090	1310	1	-1	601	601	23	799
s_1_1_contig100235	11048	s_1_1NewScaffoldedcontig_150524	s_1_1NewScaffoldedcontig_150524	6248	1	450.325	498	3.62e-123	10582	10830	1	249	1	1	249	249	0	249
s_1_1_contig100237	11424	s_1_1NewScaffoldedcontig_59778	s_1_1NewScaffoldedcontig_59778	1277	1	2111.23	2340	0	9389	10629	1277	1	1	-1	1229	1229	36	1277
s_1_1_contig100237	11424	s_1_1NewScaffoldedcontig_56209	s_1_1NewScaffoldedcontig_56209	12614	1	8430.23	9348	0	4715	9402	12614	7924	1	-1	4686	4686	5	4692
s_1_1_contig100237	11424	s_1_1NewScaffoldedcontig_92723	s_1_1NewScaffoldedcontig_92723	3892	1	6996.55	7758	0	4	3897	1	3892	1	1	3891	3891	4	3895
s_1_1_contig100241	10703	s_1_1NewScaffoldedcontig_64552	s_1_1NewScaffoldedcontig_64552	15786	1	8049.72	8926	0	6241	10703	15786	11324	1	-1	4463	4463	0	4463
s_1_1_contig100241	10703	s_1_1NewScaffoldedcontig_22078	s_1_1NewScaffoldedcontig_22078	11009	1	852.476	944	0	4636	5997	5746	7150	1	1	1056	1056	91	1429
s_1_1_contig100241	10703	s_1_1NewScaffoldedcontig_81559	s_1_1NewScaffoldedcontig_81559	6224	1	8927.96	9900	0	42	5020	6224	1225	1	-1	4977	4977	21	5000
s_1_1_contig100242	10047	s_1_1NewScaffoldedcontig_62443	s_1_1NewScaffoldedcontig_62443	5399	1	4080.51	4524	0	2067	4333	2533	268	1	-1	2266	2266	1	2267
s_1_1_contig100242	10047	s_1_1NewScaffoldedcontig_37690	s_1_1NewScaffoldedcontig_37690	24397	1	5950.6	6598	0	6749	10047	13739	10441	1	-1	3299	3299	0	3299
s_1_1_contig100242	10047	s_1_1NewScaffoldedcontig_181842	s_1_1NewScaffoldedcontig_181842	1180	1	1379.06	1528	0	4882	5682	1180	362	1	-1	793	793	18	819
s_1_1_contig100246	13208	s_1_1NewScaffoldedcontig_1754	s_1_1NewScaffoldedcontig_1754	84061	1	5295.98	5872	0	1857	4856	2994	1	1	-1	2972	2972	6	3000
s_1_1_contig100246	13208	s_1_1NewScaffoldedcontig_69472	s_1_1NewScaffoldedcontig_69472	12965	1	5223.84	5792	0	7942	10837	5328	2433	1	-1	2896	2896	0	2896
s_1_1_contig100246	13208	s_1_1NewScaffoldedcontig_134692	s_1_1NewScaffoldedcontig_134692	808	1	866.903	960	0	989	1468	1	480	1	1	480	480	0	480
s_1_1_contig100249	8719	s_1_1NewScaffoldedcontig_176939	s_1_1NewScaffoldedcontig_176939	891	1	1023.8	1134	0	46	612	891	325	1	-1	567	567	0	567
s_1_1_contig100249	8719	s_1_1NewScaffoldedcontig_86528	s_1_1NewScaffoldedcontig_86528	7200	1	7499.69	8316	0	1674	5839	7175	3010	1	-1	4163	4163	0	4166
s_1_1_contig100249	8719	s_1_1NewScaffoldedcontig_165648	s_1_1NewScaffoldedcontig_165648	578	1	969.695	1074	0	894	1433	1	540	1	1	539	539	0	540
s_1_1_contig100253	8157	s_1_1NewScaffoldedcontig_83480	s_1_1NewScaffoldedcontig_83480	4515	1	181.623	200	2.06e-42	4652	4808	448	290	1	-1	137	137	2	159
s_1_1_contig100253	8157	s_1_1NewScaffoldedcontig_54715	s_1_1NewScaffoldedcontig_54715	22057	1	185.23	204	1.69e-43	4655	4808	13252	13406	1	1	138	138	5	157
s_1_1_contig100253	8157	s_1_1NewScaffoldedcontig_24245	s_1_1NewScaffoldedcontig_24245	51225	1	14574.3	16162	0	1	8101	13279	5177	1	-1	8098	8098	4	8104
s_1_1_contig100260	10645	s_1_1NewScaffoldedcontig_20682	s_1_1NewScaffoldedcontig_20682	6741	1	412.454	456	8.77e-112	1	430	5473	5918	1	1	361	361	20	448
s_1_1_contig100260	10645	s_1_1NewScaffoldedcontig_20483	s_1_1NewScaffoldedcontig_20483	28764	1	9207.48	10210	0	5510	10614	1	5105	1	1	5105	5105	0	5105
s_1_1_contig100260	10645	s_1_1NewScaffoldedcontig_20740	s_1_1NewScaffoldedcontig_20740	11847	1	9990.15	11078	0	1	5569	6259	11847	1	1	5567	5567	22	5590
s_1_1_contig100262	10071	s_1_1NewScaffoldedcontig_75258	s_1_1NewScaffoldedcontig_75258	2365	1	104.078	114	5.62e-19	8024	8141	406	524	1	1	95	95	1	119
s_1_1_contig100262	10071	s_1_1NewScaffoldedcontig_54723	s_1_1NewScaffoldedcontig_54723	4723	1	104.078	114	5.62e-19	8021	8141	2555	2676	1	1	97	97	1	122
s_1_1_contig100262	10071	s_1_1NewScaffoldedcontig_56690	s_1_1NewScaffoldedcontig_56690	10067	1	17519.2	19428	0	18	9740	1	9724	1	1	9721	9721	1	9724
s_1_1_contig100263	12110	s_1_1NewScaffoldedcontig_31483	s_1_1NewScaffoldedcontig_31483	21639	1	15602.2	17302	0	3460	12110	1	8651	1	1	8651	8651	0	8651
s_1_1_contig100263	12110	s_1_1NewScaffoldedcontig_44	s_1_1NewScaffoldedcontig_44	2264	1	4075.1	4518	0	4900	7163	1	2264	1	1	2262	2262	0	2264
s_1_1_contig100263	12110	s_1_1NewScaffoldedcontig_109183	s_1_1NewScaffoldedcontig_109183	2246	1	4051.65	4492	0	9845	12090	1	2246	1	1	2246	2246	0	2246
s_1_1_contig100264	11465	s_1_1NewScaffoldedcontig_115547	s_1_1NewScaffoldedcontig_115547	607	1	1090.52	1208	0	10859	11465	607	1	1	-1	606	606	0	607
s_1_1_contig100264	11465	s_1_1NewScaffoldedcontig_50185	s_1_1NewScaffoldedcontig_50185	16680	1	55.3874	60	0.000290642	4733	4765	11287	11255	1	-1	32	32	0	33
s_1_1_contig100264	11465	s_1_1NewScaffoldedcontig_62270	s_1_1NewScaffoldedcontig_62270	34341	1	18604.8	20632	0	452	10785	18850	29188	1	1	10332	10332	7	10340
s_1_1_contig100271	9632	s_1_1NewScaffoldedcontig_26731	s_1_1NewScaffoldedcontig_26731	47703	1	57.1907	62	6.99e-05	8079	8139	31891	31831	1	-1	49	49	0	61
s_1_1_contig100271	9632	s_1_1NewScaffoldedcontig_88471	s_1_1NewScaffoldedcontig_88471	5358	1	51.7806	56	0.00297292	6205	6301	2957	3044	1	1	72	72	11	98
s_1_1_contig100271	9632	s_1_1NewScaffoldedcontig_8236	s_1_1NewScaffoldedcontig_8236	134115	1	17371.3	19264	0	1	9632	74357	83988	1	1	9632	9632	0	9632
s_1_1_contig100279	8662	s_1_1NewScaffoldedcontig_2523	s_1_1NewScaffoldedcontig_2523	41076	1	221.297	244	2.5e-54	7973	8154	4297	4116	1	-1	158	158	0	182
s_1_1_contig100279	8662	s_1_1NewScaffoldedcontig_60442	s_1_1NewScaffoldedcontig_60442	14068	1	15371.4	17046	0	112	8662	1	8576	1	1	8551	8551	25	8576
s_1_1_contig100279	8662	s_1_1NewScaffoldedcontig_127998	s_1_1NewScaffoldedcontig_127998	5949	1	217.691	240	3.04e-53	7971	8154	5185	5369	1	1	160	160	1	185
s_1_1_contig100282	10365	s_1_1NewScaffoldedcontig_86679	s_1_1NewScaffoldedcontig_86679	2076	1	3734.26	4140	0	1	2077	1	2076	1	1	2075	2075	1	2077
s_1_1_contig100282	10365	s_1_1NewScaffoldedcontig_80755	s_1_1NewScaffoldedcontig_80755	8119	1	13901.7	15416	0	2655	10365	376	8086	1	1	7710	7710	0	7711
s_1_1_contig100282	10365	s_1_1NewScaffoldedcontig_9011	s_1_1NewScaffoldedcontig_9011	64931	1	226.707	250	7.03e-56	1934	2147	38966	38758	1	-1	180	180	11	217
s_1_1_contig100283	10740	s_1_1NewScaffoldedcontig_31245	s_1_1NewScaffoldedcontig_31245	28085	1	14586.9	16176	0	1	8096	8096	1	1	-1	8093	8093	0	8096
s_1_1_contig100283	10740	s_1_1NewScaffoldedcontig_106396	s_1_1NewScaffoldedcontig_106396	2271	1	1534.15	1700	0	9891	10740	1	850	1	1	850	850	0	850
s_1_1_contig100283	10740	s_1_1NewScaffoldedcontig_30239	s_1_1NewScaffoldedcontig_30239	1489	1	2181.56	2418	0	8114	9327	1489	274	1	-1	1214	1214	2	1216
s_1_1_contig100286	18558	s_1_1NewScaffoldedcontig_108106	s_1_1NewScaffoldedcontig_108106	2815	1	4729.72	5244	0	12904	15531	2815	187	1	-1	2627	2627	1	2629
s_1_1_contig100286	18558	s_1_1NewScaffoldedcontig_39020	s_1_1NewScaffoldedcontig_39020	3663	1	6410.46	7108	0	5913	9611	3663	1	1	-1	3637	3637	40	3701
s_1_1_contig100286	18558	s_1_1NewScaffoldedcontig_31959	s_1_1NewScaffoldedcontig_31959	18786	1	21955.5	24348	0	439	12652	18786	6569	1	-1	12205	12205	8	12220
s_1_1_contig100287	8643	s_1_1NewScaffoldedcontig_25986	s_1_1NewScaffoldedcontig_25986	23874	1	64.4042	70	4.23e-07	7411	7569	15810	15650	1	-1	114	114	8	164
s_1_1_contig100287	8643	s_1_1NewScaffoldedcontig_78163	s_1_1NewScaffoldedcontig_78163	24399	1	15304.7	16972	0	153	8643	15910	24399	1	1	8490	8490	1	8491
s_1_1_contig100287	8643	s_1_1NewScaffoldedcontig_72188	s_1_1NewScaffoldedcontig_72188	32314	1	64.4042	70	4.23e-07	7507	7571	16999	16935	1	-1	53	53	0	65
s_1_1_contig100290	9753	s_1_1NewScaffoldedcontig_145230	s_1_1NewScaffoldedcontig_145230	10561	1	111.292	122	3.66e-21	9681	9753	799	869	1	1	69	69	2	73
s_1_1_contig100290	9753	s_1_1NewScaffoldedcontig_684	s_1_1NewScaffoldedcontig_684	25444	1	8886.48	9854	0	4568	9497	19270	14341	1	-1	4929	4929	0	4930
s_1_1_contig100290	9753	s_1_1NewScaffoldedcontig_131842	s_1_1NewScaffoldedcontig_131842	858	1	1480.05	1640	0	3709	4584	1	858	1	1	852	852	24	879
s_1_1_contig100292	11104	s_1_1NewScaffoldedcontig_74108	s_1_1NewScaffoldedcontig_74108	13783	1	116.702	128	9.82e-23	1	74	5869	5942	1	1	70	70	0	74
s_1_1_contig100292	11104	s_1_1NewScaffoldedcontig_120529	s_1_1NewScaffoldedcontig_120529	10064	1	14857.4	16476	0	2812	11104	1	8299	1	1	8273	8273	6	8299
s_1_1_contig100292	11104	s_1_1NewScaffoldedcontig_46607	s_1_1NewScaffoldedcontig_46607	11921	1	3443.92	3818	0	52	1963	2617	706	1	-1	1911	1911	0	1912
s_1_1_contig100294	9996	s_1_1NewScaffoldedcontig_94817	s_1_1NewScaffoldedcontig_94817	4008	1	7148.04	7926	0	1	3987	6	4008	1	1	3986	3986	16	4003
s_1_1_contig100294	9996	s_1_1NewScaffoldedcontig_77323	s_1_1NewScaffoldedcontig_77323	5174	1	9299.46	10312	0	4833	9996	1	5164	1	1	5163	5163	2	5165
s_1_1_contig100294	9996	s_1_1NewScaffoldedcontig_121954	s_1_1NewScaffoldedcontig_121954	3774	1	239.331	264	1.07e-59	6695	6846	2179	2330	1	1	144	144	0	152
s_1_1_contig100298	9376	s_1_1NewScaffoldedcontig_34459	s_1_1NewScaffoldedcontig_34459	18671	1	11019.9	12220	0	1	6114	9091	15205	1	1	6114	6114	1	6115
s_1_1_contig100298	9376	s_1_1NewScaffoldedcontig_72988	s_1_1NewScaffoldedcontig_72988	5167	1	241.134	266	2.89e-60	1	225	4988	4765	1	-1	189	189	1	225
s_1_1_contig100298	9376	s_1_1NewScaffoldedcontig_20682	s_1_1NewScaffoldedcontig_20682	6741	1	235.724	260	1.23e-58	1	225	5529	5752	1	1	188	188	1	225
s_1_1_contig100301	8432	s_1_1NewScaffoldedcontig_19031	s_1_1NewScaffoldedcontig_19031	78675	1	14069.4	15602	0	593	8400	47765	39956	1	-1	7808	7808	2	7810
s_1_1_contig100301	8432	s_1_1NewScaffoldedcontig_165063	s_1_1NewScaffoldedcontig_165063	615	1	1110.36	1230	0	1	615	1	615	1	1	615	615	0	615
s_1_1_contig100301	8432	s_1_1NewScaffoldedcontig_117246	s_1_1NewScaffoldedcontig_117246	7891	1	53.584	58	0.000745253	8371	8428	2421	2366	1	-1	48	48	2	58
s_1_1_contig100304	11654	s_1_1NewScaffoldedcontig_30164	s_1_1NewScaffoldedcontig_30164	24076	1	75.2244	82	3.15e-10	1	44	18104	18061	1	-1	43	43	0	44
s_1_1_contig100304	11654	s_1_1NewScaffoldedcontig_82090	s_1_1NewScaffoldedcontig_82090	10851	1	19539	21668	0	159	11007	1	10851	1	1	10847	10847	4	10852
s_1_1_contig100304	11654	s_1_1NewScaffoldedcontig_123918	s_1_1NewScaffoldedcontig_123918	11260	1	78.8312	86	2.59e-11	1	43	6559	6601	1	1	43	43	0	43
s_1_1_contig100305	10781	s_1_1NewScaffoldedcontig_106285	s_1_1NewScaffoldedcontig_106285	2381	1	93.2581	102	1.09e-15	278	348	772	702	1	-1	63	63	0	71
s_1_1_contig100305	10781	s_1_1NewScaffoldedcontig_17847	s_1_1NewScaffoldedcontig_17847	39588	1	17948.4	19904	0	98	10061	22637	12672	1	-1	9962	9962	2	9966
s_1_1_contig100305	10781	s_1_1NewScaffoldedcontig_49521	s_1_1NewScaffoldedcontig_49521	14838	1	89.6514	98	1.32e-14	277	348	8423	8352	1	-1	63	63	0	72
s_1_1_contig100306	10572	s_1_1NewScaffoldedcontig_122270	s_1_1NewScaffoldedcontig_122270	3865	1	6971.31	7730	0	6708	10572	3865	1	1	-1	3865	3865	0	3865
s_1_1_contig100306	10572	s_1_1NewScaffoldedcontig_78952	s_1_1NewScaffoldedcontig_78952	31353	1	11596.9	12860	0	99	6618	201	6691	1	1	6480	6480	29	6520
s_1_1_contig100306	10572	s_1_1NewScaffoldedcontig_66695	s_1_1NewScaffoldedcontig_66695	2851	1	289.825	320	7.16e-75	3338	3762	1417	993	1	-1	319	319	0	425
s_1_1_contig100309	12433	s_1_1NewScaffoldedcontig_27776	s_1_1NewScaffoldedcontig_27776	7474	1	13324.6	14776	0	428	7815	25	7412	1	1	7388	7388	0	7388
s_1_1_contig100309	12433	s_1_1NewScaffoldedcontig_48435	s_1_1NewScaffoldedcontig_48435	20331	1	809.196	896	0	1	451	451	1	1	-1	450	450	0	451
s_1_1_contig100309	12433	s_1_1NewScaffoldedcontig_12140	s_1_1NewScaffoldedcontig_12140	14111	1	4129.2	4578	0	8217	10505	1	2289	1	1	2289	2289	0	2289
s_1_1_contig100310	11277	s_1_1NewScaffoldedcontig_64274	s_1_1NewScaffoldedcontig_64274	1076	1	1900.23	2106	0	7248	8300	1	1053	1	1	1053	1053	0	1053
s_1_1_contig100310	11277	s_1_1NewScaffoldedcontig_41792	s_1_1NewScaffoldedcontig_41792	18714	1	19775.2	21930	0	263	11261	7699	18714	1	1	10994	10994	17	11016
s_1_1_contig100310	11277	s_1_1NewScaffoldedcontig_84799	s_1_1NewScaffoldedcontig_84799	1403	1	2486.33	2756	0	5055	6435	23	1403	1	1	1380	1380	0	1381
s_1_1_contig100314	12232	s_1_1NewScaffoldedcontig_32642	s_1_1NewScaffoldedcontig_32642	9318	1	259.168	286	1.4e-65	252	483	3596	3828	1	1	198	198	1	233
s_1_1_contig100314	12232	s_1_1NewScaffoldedcontig_3523	s_1_1NewScaffoldedcontig_3523	4734	1	6942.45	7698	0	7426	11289	31	3894	1	1	3858	3858	0	3864
s_1_1_contig100314	12232	s_1_1NewScaffoldedcontig_4925	s_1_1NewScaffoldedcontig_4925	15964	1	12558.1	13926	0	312	7277	6966	1	1	-1	6965	6965	0	6966
s_1_1_contig100315	8158	s_1_1NewScaffoldedcontig_50345	s_1_1NewScaffoldedcontig_50345	37972	1	12323.7	13666	0	227	7059	9463	16295	1	1	6833	6833	0	6833
s_1_1_contig100315	8158	s_1_1NewScaffoldedcontig_177998	s_1_1NewScaffoldedcontig_177998	1112	1	1364.63	1512	0	4923	5681	1112	354	1	-1	758	758	0	759
s_1_1_contig100315	8158	s_1_1NewScaffoldedcontig_47715	s_1_1NewScaffoldedcontig_47715	9533	1	129.325	142	1.14e-26	7047	7137	8226	8137	1	-1	84	84	1	91
s_1_1_contig100316	8348	s_1_1NewScaffoldedcontig_31605	s_1_1NewScaffoldedcontig_31605	605	1	208.674	230	1.52e-50	1	162	424	584	1	1	144	144	1	162
s_1_1_contig100316	8348	s_1_1NewScaffoldedcontig_24846	s_1_1NewScaffoldedcontig_24846	27485	1	212.28	234	1.25e-51	1	162	17121	16961	1	-1	145	145	1	162
s_1_1_contig100316	8348	s_1_1NewScaffoldedcontig_8539	s_1_1NewScaffoldedcontig_8539	73730	1	11005.4	12204	0	2100	8201	47933	54034	1	1	6102	6102	0	6102
s_1_1_contig100317	8283	s_1_1NewScaffoldedcontig_36728	s_1_1NewScaffoldedcontig_36728	16296	1	13342.6	14796	0	833	8283	7479	1	1	-1	7441	7441	28	7479
s_1_1_contig100317	8283	s_1_1NewScaffoldedcontig_192688	s_1_1NewScaffoldedcontig_192688	407	1	659.516	730	0	4647	5044	383	1	1	-1	383	383	15	398
s_1_1_contig100317	8283	s_1_1NewScaffoldedcontig_45638	s_1_1NewScaffoldedcontig_45638	571	1	1031.01	1142	0	264	834	571	1	1	-1	571	571	0	571
s_1_1_contig100327	8822	s_1_1NewScaffoldedcontig_107562	s_1_1NewScaffoldedcontig_107562	6413	1	3252.76	3606	0	6980	8822	6413	4582	1	-1	1829	1829	13	1844
s_1_1_contig100327	8822	s_1_1NewScaffoldedcontig_182474	s_1_1NewScaffoldedcontig_182474	637	1	989.532	1096	0	126	720	637	1	1	-1	594	594	42	637
s_1_1_contig100327	8822	s_1_1NewScaffoldedcontig_101871	s_1_1NewScaffoldedcontig_101871	12409	1	11467.1	12716	0	693	7058	8214	1849	1	-1	6363	6363	0	6366
s_1_1_contig100334	10719	s_1_1NewScaffoldedcontig_98554	s_1_1NewScaffoldedcontig_98554	6284	1	2850.61	3160	0	277	1861	1587	1	1	-1	1585	1585	2	1587
s_1_1_contig100334	10719	s_1_1NewScaffoldedcontig_115048	s_1_1NewScaffoldedcontig_115048	2093	1	3763.11	4172	0	2641	4737	2093	1	1	-1	2093	2093	4	2097
s_1_1_contig100334	10719	s_1_1NewScaffoldedcontig_115047	s_1_1NewScaffoldedcontig_115047	5334	1	9566.35	10608	0	4916	10244	1	5334	1	1	5325	5325	5	5334
s_1_1_contig100338	11669	s_1_1NewScaffoldedcontig_11443	s_1_1NewScaffoldedcontig_11443	51528	1	20927.6	23208	0	46	11658	22697	11087	1	-1	11611	11611	2	11613
s_1_1_contig100338	11669	s_1_1NewScaffoldedcontig_74521	s_1_1NewScaffoldedcontig_74521	16899	1	105.882	116	1.87e-19	11596	11664	5040	4971	1	-1	66	66	1	70
s_1_1_contig100338	11669	s_1_1NewScaffoldedcontig_181553	s_1_1NewScaffoldedcontig_181553	885	1	107.685	118	5.34e-20	11589	11668	104	24	1	-1	73	73	1	81
s_1_1_contig100339	10544	s_1_1NewScaffoldedcontig_26519	s_1_1NewScaffoldedcontig_26519	63030	1	9101.09	10092	0	436	5539	26541	21409	1	-1	5096	5096	45	5141
s_1_1_contig100339	10544	s_1_1NewScaffoldedcontig_186300	s_1_1NewScaffoldedcontig_186300	899	1	1593.66	1766	0	7443	8325	1	883	1	1	883	883	0	883
s_1_1_contig100339	10544	s_1_1NewScaffoldedcontig_172728	s_1_1NewScaffoldedcontig_172728	1280	1	2172.54	2408	0	9284	10544	1280	1	1	-1	1254	1254	29	1285
s_1_1_contig100340	8478	s_1_1NewScaffoldedcontig_4525	s_1_1NewScaffoldedcontig_4525	12399	1	15263.2	16926	0	1	8467	8509	42	1	-1	8467	8467	1	8468
s_1_1_contig100340	8478	s_1_1NewScaffoldedcontig_119924	s_1_1NewScaffoldedcontig_119924	3351	1	654.106	724	0	2627	3304	782	85	1	-1	566	566	24	700
s_1_1_contig100340	8478	s_1_1NewScaffoldedcontig_39143	s_1_1NewScaffoldedcontig_39143	2487	1	1364.63	1512	0	3327	4798	1516	1	1	-1	1232	1232	122	1555
s_1_1_contig100341	9589	s_1_1NewScaffoldedcontig_42948	s_1_1NewScaffoldedcontig_42948	2510	1	3963.29	4394	0	55	2251	2197	1	1	-1	2197	2197	0	2197
s_1_1_contig100341	9589	s_1_1NewScaffoldedcontig_64319	s_1_1NewScaffoldedcontig_64319	14373	1	1077.9	1194	0	8514	9213	14373	13683	1	-1	661	661	49	720
s_1_1_contig100341	9589	s_1_1NewScaffoldedcontig_42947	s_1_1NewScaffoldedcontig_42947	13686	1	10819.7	11998	0	2552	8583	7627	13686	1	1	6032	6032	28	6060
s_1_1_contig100343	11030	s_1_1NewScaffoldedcontig_91328	s_1_1NewScaffoldedcontig_91328	3951	1	549.51	608	5.02e-153	9987	10478	3271	3762	1	1	417	417	0	492
s_1_1_contig100343	11030	s_1_1NewScaffoldedcontig_163635	s_1_1NewScaffoldedcontig_163635	2994	1	5362.7	5946	0	1	3010	2994	1	1	-1	2993	2993	16	3010
s_1_1_contig100343	11030	s_1_1NewScaffoldedcontig_23200	s_1_1NewScaffoldedcontig_23200	14888	1	13081.1	14506	0	2973	10298	7294	1	1	-1	7291	7291	32	7326
s_1_1_contig100344	8422	s_1_1NewScaffoldedcontig_23074	s_1_1NewScaffoldedcontig_23074	22953	1	58.9941	64	1.75e-05	5126	5232	1424	1323	1	-1	78	78	5	107
s_1_1_contig100344	8422	s_1_1NewScaffoldedcontig_13550	s_1_1NewScaffoldedcontig_13550	17458	1	11292.2	12522	0	84	6347	12423	6160	1	-1	6263	6263	0	6264
s_1_1_contig100344	8422	s_1_1NewScaffoldedcontig_123732	s_1_1NewScaffoldedcontig_123732	13229	1	58.9941	64	1.75e-05	5126	5231	2597	2695	1	1	77	77	7	106
s_1_1_contig100345	11655	s_1_1NewScaffoldedcontig_58014	s_1_1NewScaffoldedcontig_58014	22436	1	9465.37	10496	0	2243	7494	7486	12738	1	1	5252	5252	1	5253
s_1_1_contig100345	11655	s_1_1NewScaffoldedcontig_189718	s_1_1NewScaffoldedcontig_189718	619	1	1112.16	1232	0	7614	8232	619	1	1	-1	618	618	0	619
s_1_1_contig100345	11655	s_1_1NewScaffoldedcontig_192555	s_1_1NewScaffoldedcontig_192555	524	1	946.252	1048	0	379	902	524	1	1	-1	524	524	0	524
s_1_1_contig100348	16484	s_1_1NewScaffoldedcontig_1132	s_1_1NewScaffoldedcontig_1132	30904	1	421.471	466	2.63e-114	16060	16484	12211	12645	1	1	359	359	18	439
s_1_1_contig100348	16484	s_1_1NewScaffoldedcontig_8492	s_1_1NewScaffoldedcontig_8492	33077	1	15485	17172	0	1	8586	19457	10872	1	-1	8586	8586	0	8586
s_1_1_contig100348	16484	s_1_1NewScaffoldedcontig_34970	s_1_1NewScaffoldedcontig_34970	35229	1	464.752	514	2.46e-127	16064	16484	12705	12267	1	-1	367	367	20	440
s_1_1_contig100351	11212	s_1_1NewScaffoldedcontig_54173	s_1_1NewScaffoldedcontig_54173	10468	1	8985.67	9964	0	2015	6999	1848	6832	1	1	4984	4984	0	4985
s_1_1_contig100351	11212	s_1_1NewScaffoldedcontig_130554	s_1_1NewScaffoldedcontig_130554	888	1	948.055	1050	0	1213	1804	888	275	1	-1	571	571	22	614
s_1_1_contig100351	11212	s_1_1NewScaffoldedcontig_187174	s_1_1NewScaffoldedcontig_187174	612	1	1104.95	1224	0	10601	11212	1	612	1	1	612	612	0	612
s_1_1_contig100353	11936	s_1_1NewScaffoldedcontig_68398	s_1_1NewScaffoldedcontig_68398	12112	1	53.584	58	0.00105624	11905	11936	12056	12087	1	1	31	31	0	32
s_1_1_contig100353	11936	s_1_1NewScaffoldedcontig_20738	s_1_1NewScaffoldedcontig_20738	6861	1	53.584	58	0.00105624	11905	11936	6837	6806	1	-1	31	31	0	32
s_1_1_contig100353	11936	s_1_1NewScaffoldedcontig_42467	s_1_1NewScaffoldedcontig_42467	38105	1	15041.4	16680	0	1	8349	14075	22420	1	1	8346	8346	3	8349
s_1_1_contig100360	8665	s_1_1NewScaffoldedcontig_39550	s_1_1NewScaffoldedcontig_39550	37864	1	15573.4	17270	0	1	8647	34212	25567	1	-1	8643	8643	1	8647
s_1_1_contig100360	8665	s_1_1NewScaffoldedcontig_103900	s_1_1NewScaffoldedcontig_103900	1761	1	51.7806	56	0.00267337	2647	2703	1755	1701	1	-1	46	46	2	57
s_1_1_contig100360	8665	s_1_1NewScaffoldedcontig_53751	s_1_1NewScaffoldedcontig_53751	15911	1	57.1907	62	6.29e-05	2628	2675	15804	15758	1	-1	42	42	1	48
s_1_1_contig100363	9414	s_1_1NewScaffoldedcontig_10255	s_1_1NewScaffoldedcontig_10255	1283	1	1896.63	2102	0	8361	9414	1283	230	1	-1	1053	1053	0	1054
s_1_1_contig100363	9414	s_1_1NewScaffoldedcontig_25598	s_1_1NewScaffoldedcontig_25598	5040	1	5351.88	5934	0	873	3842	1824	4793	1	1	2969	2969	0	2970
s_1_1_contig100363	9414	s_1_1NewScaffoldedcontig_18236	s_1_1NewScaffoldedcontig_18236	4457	1	8020.87	8894	0	4064	8519	1	4457	1	1	4454	4454	1	4457
s_1_1_contig100364	8077	s_1_1NewScaffoldedcontig_173699	s_1_1NewScaffoldedcontig_173699	1055	1	1847.94	2048	0	6995	8035	1055	1	1	-1	1041	1041	14	1055
s_1_1_contig100364	8077	s_1_1NewScaffoldedcontig_52721	s_1_1NewScaffoldedcontig_52721	6478	1	9515.86	10552	0	33	5314	6478	1196	1	-1	5281	5281	1	5283
s_1_1_contig100364	8077	s_1_1NewScaffoldedcontig_171546	s_1_1NewScaffoldedcontig_171546	691	1	652.302	722	0	6743	7103	361	1	1	-1	361	361	0	361
s_1_1_contig100365	8300	s_1_1NewScaffoldedcontig_94976	s_1_1NewScaffoldedcontig_94976	1776	1	3198.66	3546	0	6438	8213	1	1776	1	1	1775	1775	0	1776
s_1_1_contig100365	8300	s_1_1NewScaffoldedcontig_81873	s_1_1NewScaffoldedcontig_81873	10690	1	7896.43	8756	0	284	4666	4383	1	1	-1	4381	4381	0	4383
s_1_1_contig100365	8300	s_1_1NewScaffoldedcontig_93426	s_1_1NewScaffoldedcontig_93426	1520	1	2742.41	3040	0	4738	6257	1	1520	1	1	1520	1520	0	1520
s_1_1_contig100369	9264	s_1_1NewScaffoldedcontig_50220	s_1_1NewScaffoldedcontig_50220	5156	1	3544.91	3930	0	6926	8890	1575	3539	1	1	1965	1965	0	1965
s_1_1_contig100369	9264	s_1_1NewScaffoldedcontig_5708	s_1_1NewScaffoldedcontig_5708	32864	1	9180.43	10180	0	2	5099	5098	1	1	-1	5095	5095	0	5098
s_1_1_contig100369	9264	s_1_1NewScaffoldedcontig_135362	s_1_1NewScaffoldedcontig_135362	2073	1	508.033	562	1.29e-140	8984	9264	2073	1793	1	-1	281	281	0	281
s_1_1_contig100373	15773	s_1_1NewScaffoldedcontig_816	s_1_1NewScaffoldedcontig_816	28649	1	5189.58	5754	0	4851	7727	25773	28649	1	1	2877	2877	0	2877
s_1_1_contig100373	15773	s_1_1NewScaffoldedcontig_58208	s_1_1NewScaffoldedcontig_58208	16120	1	11854.8	13146	0	8018	14610	1	6594	1	1	6591	6591	5	6596
s_1_1_contig100373	15773	s_1_1NewScaffoldedcontig_173215	s_1_1NewScaffoldedcontig_173215	824	1	1487.26	1648	0	7638	8461	824	1	1	-1	824	824	0	824
s_1_1_contig100375	15684	s_1_1NewScaffoldedcontig_120556	s_1_1NewScaffoldedcontig_120556	1484	1	2641.42	2928	0	2193	3693	1484	1	1	-1	1484	1484	17	1501
s_1_1_contig100375	15684	s_1_1NewScaffoldedcontig_105954	s_1_1NewScaffoldedcontig_105954	12991	1	57.1907	62	0.000114007	15651	15684	12496	12529	1	1	33	33	0	34
s_1_1_contig100375	15684	s_1_1NewScaffoldedcontig_6430	s_1_1NewScaffoldedcontig_6430	53873	1	27185.3	30148	0	1	15079	48673	33595	1	-1	15077	15077	0	15079
s_1_1_contig100376	8767	s_1_1NewScaffoldedcontig_34846	s_1_1NewScaffoldedcontig_34846	29850	1	5113.84	5670	0	1	2838	17331	20168	1	1	2837	2837	0	2838
s_1_1_contig100376	8767	s_1_1NewScaffoldedcontig_31055	s_1_1NewScaffoldedcontig_31055	29017	1	185.23	204	1.82e-43	6254	6566	317	3	1	-1	240	240	16	322
s_1_1_contig100376	8767	s_1_1NewScaffoldedcontig_99342	s_1_1NewScaffoldedcontig_99342	1775	1	3131.93	3472	0	7032	8767	1775	40	1	-1	1736	1736	0	1736
s_1_1_contig100381	10894	s_1_1NewScaffoldedcontig_108200	s_1_1NewScaffoldedcontig_108200	4067	1	51.7806	56	0.00336386	6493	6533	4025	3985	1	-1	36	36	0	41
s_1_1_contig100381	10894	s_1_1NewScaffoldedcontig_56506	s_1_1NewScaffoldedcontig_56506	12897	1	18824.8	20876	0	422	10874	12897	2446	1	-1	10448	10448	1	10453
s_1_1_contig100381	10894	s_1_1NewScaffoldedcontig_51132	s_1_1NewScaffoldedcontig_51132	15034	1	49.9773	54	0.011741	6213	6251	7023	6986	1	-1	35	35	1	39
s_1_1_contig100382	10225	s_1_1NewScaffoldedcontig_95467	s_1_1NewScaffoldedcontig_95467	4579	1	5321.22	5900	0	7273	10225	1627	4579	1	1	2952	2952	0	2953
s_1_1_contig100382	10225	s_1_1NewScaffoldedcontig_126994	s_1_1NewScaffoldedcontig_126994	2004	1	3597.2	3988	0	3239	5242	1	2004	1	1	2000	2000	0	2004
s_1_1_contig100382	10225	s_1_1NewScaffoldedcontig_55897	s_1_1NewScaffoldedcontig_55897	13287	1	11431	12676	0	403	6755	6352	1	1	-1	6348	6348	1	6353
s_1_1_contig100385	11063	s_1_1NewScaffoldedcontig_109097	s_1_1NewScaffoldedcontig_109097	1894	1	246.544	272	8.01e-62	6185	6410	1422	1647	1	1	190	190	0	226
s_1_1_contig100385	11063	s_1_1NewScaffoldedcontig_32642	s_1_1NewScaffoldedcontig_32642	9318	1	251.955	278	1.88e-63	6185	6393	3593	3800	1	1	182	182	1	209
s_1_1_contig100385	11063	s_1_1NewScaffoldedcontig_8012	s_1_1NewScaffoldedcontig_8012	32995	1	19924.9	22096	0	1	11063	27204	16140	1	-1	11061	11061	4	11066
s_1_1_contig100386	11114	s_1_1NewScaffoldedcontig_70086	s_1_1NewScaffoldedcontig_70086	2244	1	113.095	124	1.2e-21	11037	11114	2131	2209	1	1	73	73	1	79
s_1_1_contig100386	11114	s_1_1NewScaffoldedcontig_2422	s_1_1NewScaffoldedcontig_2422	19638	1	113.095	124	1.2e-21	11037	11114	9507	9585	1	1	73	73	1	79
s_1_1_contig100386	11114	s_1_1NewScaffoldedcontig_7565	s_1_1NewScaffoldedcontig_7565	72402	1	19917.7	22088	0	1	11074	47222	58288	1	1	11064	11064	9	11075
s_1_1_contig100390	8132	s_1_1NewScaffoldedcontig_18970	s_1_1NewScaffoldedcontig_18970	12270	1	118.505	130	2.06e-23	5564	5683	11251	11370	1	1	98	98	0	120
s_1_1_contig100390	8132	s_1_1NewScaffoldedcontig_35241	s_1_1NewScaffoldedcontig_35241	10672	1	12765.5	14156	0	127	7219	10439	3348	1	-1	7088	7088	1	7093
s_1_1_contig100390	8132	s_1_1NewScaffoldedcontig_32025	s_1_1NewScaffoldedcontig_32025	1950	1	98.6682	108	1.93e-17	5557	5668	524	413	1	-1	89	89	0	112
s_1_1_contig100392	10245	s_1_1NewScaffoldedcontig_129012	s_1_1NewScaffoldedcontig_129012	4911	1	309.662	342	7.41e-81	2668	2838	1	171	1	1	171	171	0	171
s_1_1_contig100392	10245	s_1_1NewScaffoldedcontig_9553	s_1_1NewScaffoldedcontig_9553	24096	1	11589.7	12852	0	2839	9264	6426	1	1	-1	6426	6426	0	6426
s_1_1_contig100392	10245	s_1_1NewScaffoldedcontig_71702	s_1_1NewScaffoldedcontig_71702	2097	1	3777.54	4188	0	128	2224	1	2097	1	1	2096	2096	0	2097
s_1_1_contig100395	12022	s_1_1NewScaffoldedcontig_166191	s_1_1NewScaffoldedcontig_166191	992	1	922.808	1022	0	1	511	1	511	1	1	511	511	0	511
s_1_1_contig100395	12022	s_1_1NewScaffoldedcontig_98085	s_1_1NewScaffoldedcontig_98085	8500	1	7068.69	7838	0	5946	9895	4478	8450	1	1	3949	3949	25	3974
s_1_1_contig100395	12022	s_1_1NewScaffoldedcontig_118146	s_1_1NewScaffoldedcontig_118146	1122	1	2024.67	2244	0	10901	12022	1122	1	1	-1	1122	1122	0	1122
s_1_1_contig100398	9739	s_1_1NewScaffoldedcontig_13656	s_1_1NewScaffoldedcontig_13656	9989	1	15555.3	17250	0	1115	9739	8861	237	1	-1	8625	8625	0	8625
s_1_1_contig100398	9739	s_1_1NewScaffoldedcontig_72229	s_1_1NewScaffoldedcontig_72229	18290	1	55.3874	60	0.000246753	7677	7722	14674	14720	1	1	41	41	1	47
s_1_1_contig100398	9739	s_1_1NewScaffoldedcontig_62886	s_1_1NewScaffoldedcontig_62886	22184	1	49.9773	54	0.0104922	1	34	19377	19345	1	-1	32	32	1	34
s_1_1_contig100402	9015	s_1_1NewScaffoldedcontig_91820	s_1_1NewScaffoldedcontig_91820	2820	1	55.3874	60	0.000228343	8750	8811	1157	1216	1	1	51	51	2	62
s_1_1_contig100402	9015	s_1_1NewScaffoldedcontig_36324	s_1_1NewScaffoldedcontig_36324	56763	1	13782.6	15284	0	862	8503	7666	25	1	-1	7642	7642	0	7642
s_1_1_contig100402	9015	s_1_1NewScaffoldedcontig_126743	s_1_1NewScaffoldedcontig_126743	7008	1	57.1907	62	6.54e-05	8741	8805	5422	5484	1	1	53	53	2	65
s_1_1_contig100403	17023	s_1_1NewScaffoldedcontig_11884	s_1_1NewScaffoldedcontig_11884	20672	1	25746.2	28552	0	112	14454	6284	20672	1	1	14337	14337	46	14389
s_1_1_contig100403	17023	s_1_1NewScaffoldedcontig_90036	s_1_1NewScaffoldedcontig_90036	2547	1	4507.9	4998	0	11880	14454	2547	1	1	-1	2542	2542	30	2576
s_1_1_contig100403	17023	s_1_1NewScaffoldedcontig_90035	s_1_1NewScaffoldedcontig_90035	2217	1	3952.47	4382	0	14434	16627	1	2194	1	1	2193	2193	0	2194
s_1_1_contig100405	10076	s_1_1NewScaffoldedcontig_83935	s_1_1NewScaffoldedcontig_83935	12162	1	237.528	262	3.78e-59	7507	7789	449	161	1	-1	228	228	8	290
s_1_1_contig100405	10076	s_1_1NewScaffoldedcontig_19007	s_1_1NewScaffoldedcontig_19007	15093	1	248.348	274	2.09e-62	7507	7786	13231	12959	1	-1	226	226	11	282
s_1_1_contig100405	10076	s_1_1NewScaffoldedcontig_59657	s_1_1NewScaffoldedcontig_59657	9965	1	17809.6	19750	0	121	10076	9965	1	1	-1	9926	9926	17	9969
s_1_1_contig100410	9629	s_1_1NewScaffoldedcontig_141793	s_1_1NewScaffoldedcontig_141793	4291	1	7568.22	8392	0	5424	9629	1	4206	1	1	4202	4202	0	4206
s_1_1_contig100410	9629	s_1_1NewScaffoldedcontig_25854	s_1_1NewScaffoldedcontig_25854	8519	1	154.573	170	3.39e-34	1	88	105	18	1	-1	87	87	0	88
s_1_1_contig100410	9629	s_1_1NewScaffoldedcontig_138541	s_1_1NewScaffoldedcontig_138541	6262	1	9732.26	10792	0	1	5447	1	5423	1	1	5423	5423	24	5447
s_1_1_contig100411	8688	s_1_1NewScaffoldedcontig_4060	s_1_1NewScaffoldedcontig_4060	49068	1	282.612	312	8.73e-73	8424	8688	47335	47604	1	1	229	229	11	273
s_1_1_contig100411	8688	s_1_1NewScaffoldedcontig_108966	s_1_1NewScaffoldedcontig_108966	5302	1	9523.07	10560	0	147	5447	1	5302	1	1	5294	5294	1	5302
s_1_1_contig100411	8688	s_1_1NewScaffoldedcontig_118096	s_1_1NewScaffoldedcontig_118096	3047	1	5447.46	6040	0	5669	8688	3047	28	1	-1	3020	3020	0	3020
s_1_1_contig100416	11125	s_1_1NewScaffoldedcontig_59396	s_1_1NewScaffoldedcontig_59396	23513	1	154.573	170	3.91e-34	3648	3932	5623	5918	1	1	217	217	15	298
s_1_1_contig100416	11125	s_1_1NewScaffoldedcontig_150089	s_1_1NewScaffoldedcontig_150089	1986	1	161.786	178	2.64e-36	3687	3911	408	176	1	-1	177	177	8	233
s_1_1_contig100416	11125	s_1_1NewScaffoldedcontig_36627	s_1_1NewScaffoldedcontig_36627	12742	1	19560.6	21692	0	1	10856	82	10937	1	1	10852	10852	0	10856
s_1_1_contig100418	10065	s_1_1NewScaffoldedcontig_93330	s_1_1NewScaffoldedcontig_93330	1720	1	3043.57	3374	0	2905	4601	25	1720	1	1	1694	1694	1	1697
s_1_1_contig100418	10065	s_1_1NewScaffoldedcontig_97575	s_1_1NewScaffoldedcontig_97575	9521	1	17041.3	18898	0	498	10022	9502	1	1	-1	9493	9493	27	9527
s_1_1_contig100418	10065	s_1_1NewScaffoldedcontig_162821	s_1_1NewScaffoldedcontig_162821	823	1	1485.46	1646	0	4581	5403	823	1	1	-1	823	823	0	823
s_1_1_contig100423	9837	s_1_1NewScaffoldedcontig_4177	s_1_1NewScaffoldedcontig_4177	47667	1	17658.1	19582	0	30	9825	47667	37872	1	-1	9794	9794	0	9796
s_1_1_contig100423	9837	s_1_1NewScaffoldedcontig_10569	s_1_1NewScaffoldedcontig_10569	74520	1	154.573	170	3.46e-34	289	388	71016	71115	1	1	94	94	0	100
s_1_1_contig100423	9837	s_1_1NewScaffoldedcontig_94637	s_1_1NewScaffoldedcontig_94637	2397	1	116.702	128	8.69e-23	1	94	455	550	1	1	87	87	4	97
s_1_1_contig100431	19935	s_1_1NewScaffoldedcontig_66337	s_1_1NewScaffoldedcontig_66337	24431	1	29632.4	32862	0	1	16441	21796	5356	1	-1	16437	16437	0	16441
s_1_1_contig100431	19935	s_1_1NewScaffoldedcontig_60404	s_1_1NewScaffoldedcontig_60404	30850	1	66.2076	72	2.8e-07	19572	19617	8898	8943	1	1	42	42	0	46
s_1_1_contig100431	19935	s_1_1NewScaffoldedcontig_153832	s_1_1NewScaffoldedcontig_153832	738	1	1332.17	1476	0	16341	17078	1	738	1	1	738	738	0	738
s_1_1_contig100432	9727	s_1_1NewScaffoldedcontig_4118	s_1_1NewScaffoldedcontig_4118	2127	1	55.3874	60	0.000246448	1908	1965	1531	1588	1	1	47	47	0	58
s_1_1_contig100432	9727	s_1_1NewScaffoldedcontig_41966	s_1_1NewScaffoldedcontig_41966	30191	1	14981.9	16614	0	1332	9638	28799	20493	1	-1	8307	8307	0	8307
s_1_1_contig100432	9727	s_1_1NewScaffoldedcontig_82405	s_1_1NewScaffoldedcontig_82405	22183	1	55.3874	60	0.000246448	1908	1965	20142	20199	1	1	47	47	0	58
s_1_1_contig100435	15165	s_1_1NewScaffoldedcontig_101242	s_1_1NewScaffoldedcontig_101242	9888	1	11034.3	12236	0	1	6221	6208	1	1	-1	6173	6173	13	6221
s_1_1_contig100435	15165	s_1_1NewScaffoldedcontig_22210	s_1_1NewScaffoldedcontig_22210	6492	1	11694.3	12968	0	6318	12809	1	6492	1	1	6489	6489	0	6492
s_1_1_contig100435	15165	s_1_1NewScaffoldedcontig_65091	s_1_1NewScaffoldedcontig_65091	2451	1	4421.34	4902	0	7455	9905	2451	1	1	-1	2451	2451	0	2451
s_1_1_contig100437	13288	s_1_1NewScaffoldedcontig_45535	s_1_1NewScaffoldedcontig_45535	8782	1	8469.91	9392	0	7507	12235	5573	820	1	-1	4727	4727	25	4754
s_1_1_contig100437	13288	s_1_1NewScaffoldedcontig_49100	s_1_1NewScaffoldedcontig_49100	6885	1	6634.08	7356	0	1910	5597	3121	6808	1	1	3684	3684	0	3688
s_1_1_contig100437	13288	s_1_1NewScaffoldedcontig_177792	s_1_1NewScaffoldedcontig_177792	961	1	1734.32	1922	0	1	961	1	961	1	1	961	961	0	961
s_1_1_contig100438	9133	s_1_1NewScaffoldedcontig_38567	s_1_1NewScaffoldedcontig_38567	28432	1	89.6514	98	1.12e-14	7161	7209	17800	17752	1	-1	49	49	0	49
s_1_1_contig100438	9133	s_1_1NewScaffoldedcontig_14769	s_1_1NewScaffoldedcontig_14769	17443	1	9268.8	10278	0	3974	9132	12287	17443	1	1	5153	5153	6	5161
s_1_1_contig100438	9133	s_1_1NewScaffoldedcontig_111579	s_1_1NewScaffoldedcontig_111579	1224	1	87.848	96	3.91e-14	7162	7209	723	770	1	1	48	48	0	48
s_1_1_contig100448	8613	s_1_1NewScaffoldedcontig_75720	s_1_1NewScaffoldedcontig_75720	9167	1	51.7806	56	0.00265726	5215	5291	4455	4529	1	1	59	59	2	77
s_1_1_contig100448	8613	s_1_1NewScaffoldedcontig_19255	s_1_1NewScaffoldedcontig_19255	51663	1	51.7806	56	0.00265726	5200	5260	40363	40303	1	-1	48	48	0	61
s_1_1_contig100448	8613	s_1_1NewScaffoldedcontig_47753	s_1_1NewScaffoldedcontig_47753	8494	1	15279.4	16944	0	142	8613	23	8494	1	1	8472	8472	0	8472
s_1_1_contig100459	10659	s_1_1NewScaffoldedcontig_24282	s_1_1NewScaffoldedcontig_24282	17679	1	116.702	128	9.42e-23	10572	10659	10735	10649	1	-1	79	79	1	88
s_1_1_contig100459	10659	s_1_1NewScaffoldedcontig_60979	s_1_1NewScaffoldedcontig_60979	3995	1	7182.3	7964	0	1919	5913	1	3995	1	1	3990	3990	0	3995
s_1_1_contig100459	10659	s_1_1NewScaffoldedcontig_11067	s_1_1NewScaffoldedcontig_11067	55387	1	19126	21210	0	1	10608	22843	12236	1	-1	10607	10607	0	10608
s_1_1_contig100460	8919	s_1_1NewScaffoldedcontig_10369	s_1_1NewScaffoldedcontig_10369	3535	1	5606.16	6216	0	265	3372	3108	1	1	-1	3108	3108	0	3108
s_1_1_contig100460	8919	s_1_1NewScaffoldedcontig_14146	s_1_1NewScaffoldedcontig_14146	4886	1	8785.5	9742	0	3601	8471	1	4871	1	1	4871	4871	0	4871
s_1_1_contig100460	8919	s_1_1NewScaffoldedcontig_116877	s_1_1NewScaffoldedcontig_116877	8437	1	55.3874	60	0.000225902	7435	7539	198	94	1	-1	75	75	0	105
s_1_1_contig100468	12015	s_1_1NewScaffoldedcontig_84848	s_1_1NewScaffoldedcontig_84848	4777	1	5966.83	6616	0	4004	7314	4777	1467	1	-1	3310	3310	0	3311
s_1_1_contig100468	12015	s_1_1NewScaffoldedcontig_140753	s_1_1NewScaffoldedcontig_140753	2205	1	3773.93	4184	0	1024	3115	114	2205	1	1	2092	2092	0	2092
s_1_1_contig100468	12015	s_1_1NewScaffoldedcontig_133434	s_1_1NewScaffoldedcontig_133434	2802	1	5034.49	5582	0	8702	11492	2802	12	1	-1	2791	2791	0	2791
s_1_1_contig100477	11411	s_1_1NewScaffoldedcontig_38767	s_1_1NewScaffoldedcontig_38767	34055	1	18713	20752	0	15	10437	34055	23598	1	-1	10420	10420	37	10459
s_1_1_contig100477	11411	s_1_1NewScaffoldedcontig_156383	s_1_1NewScaffoldedcontig_156383	1050	1	324.089	358	3.75e-85	3713	4122	787	359	1	-1	335	335	35	437
s_1_1_contig100477	11411	s_1_1NewScaffoldedcontig_34537	s_1_1NewScaffoldedcontig_34537	37998	1	327.696	362	3.08e-86	3716	4113	14673	14255	1	-1	327	327	33	425
s_1_1_contig100478	12681	s_1_1NewScaffoldedcontig_62126	s_1_1NewScaffoldedcontig_62126	16515	1	13248.8	14692	0	1	7363	14965	7596	1	-1	7360	7360	7	7370
s_1_1_contig100478	12681	s_1_1NewScaffoldedcontig_53071	s_1_1NewScaffoldedcontig_53071	5430	1	838.049	928	0	12115	12681	4675	5241	1	1	526	526	0	567
s_1_1_contig100478	12681	s_1_1NewScaffoldedcontig_115716	s_1_1NewScaffoldedcontig_115716	6057	1	73.4211	80	1.2e-09	7643	7697	5662	5716	1	1	49	49	0	55
s_1_1_contig100482	10162	s_1_1NewScaffoldedcontig_143934	s_1_1NewScaffoldedcontig_143934	730	1	637.875	706	1.16e-179	753	1105	546	194	1	-1	353	353	0	353
s_1_1_contig100482	10162	s_1_1NewScaffoldedcontig_73261	s_1_1NewScaffoldedcontig_73261	32241	1	14370.5	15936	0	1567	9538	6174	14146	1	1	7972	7972	1	7973
s_1_1_contig100482	10162	s_1_1NewScaffoldedcontig_120484	s_1_1NewScaffoldedcontig_120484	8211	1	71.6177	78	3.35e-09	6533	6616	7397	7480	1	1	66	66	0	84
s_1_1_contig100489	13487	s_1_1NewScaffoldedcontig_89415	s_1_1NewScaffoldedcontig_89415	10636	1	60.7975	66	8.04e-06	13446	13487	6997	6955	1	-1	40	40	1	43
s_1_1_contig100489	13487	s_1_1NewScaffoldedcontig_86411	s_1_1NewScaffoldedcontig_86411	2141	1	3826.23	4242	0	1098	3255	2141	1	1	-1	2141	2141	17	2158
s_1_1_contig100489	13487	s_1_1NewScaffoldedcontig_19872	s_1_1NewScaffoldedcontig_19872	54770	1	24240.4	26882	0	1	13486	4136	17616	1	1	13472	13472	13	13490
s_1_1_contig100490	10481	s_1_1NewScaffoldedcontig_135117	s_1_1NewScaffoldedcontig_135117	6341	1	11427.4	12672	0	3520	9860	6341	1	1	-1	6339	6339	0	6341
s_1_1_contig100490	10481	s_1_1NewScaffoldedcontig_21535	s_1_1NewScaffoldedcontig_21535	4049	1	3103.08	3440	0	554	2273	2330	4049	1	1	1720	1720	0	1720
s_1_1_contig100490	10481	s_1_1NewScaffoldedcontig_177282	s_1_1NewScaffoldedcontig_177282	776	1	1400.7	1552	0	2521	3296	1	776	1	1	776	776	0	776
s_1_1_contig100491	13052	s_1_1NewScaffoldedcontig_51399	s_1_1NewScaffoldedcontig_51399	8935	1	15919.6	17654	0	48	8880	1	8834	1	1	8832	8832	1	8834
s_1_1_contig100491	13052	s_1_1NewScaffoldedcontig_110771	s_1_1NewScaffoldedcontig_110771	4620	1	6114.71	6780	0	9606	13009	1061	4465	1	1	3400	3400	1	3405
s_1_1_contig100491	13052	s_1_1NewScaffoldedcontig_175566	s_1_1NewScaffoldedcontig_175566	464	1	526.067	582	6.78e-146	7236	7526	1	291	1	1	291	291	0	291
s_1_1_contig100496	15459	s_1_1NewScaffoldedcontig_22154	s_1_1NewScaffoldedcontig_22154	10336	1	18583.2	20608	0	5142	15459	10336	19	1	-1	10315	10315	4	10320
s_1_1_contig100496	15459	s_1_1NewScaffoldedcontig_92423	s_1_1NewScaffoldedcontig_92423	5318	1	8933.37	9906	0	1	4957	361	5318	1	1	4957	4957	1	4958
s_1_1_contig100496	15459	s_1_1NewScaffoldedcontig_151130	s_1_1NewScaffoldedcontig_151130	2323	1	4185.1	4640	0	8253	10575	1	2323	1	1	2322	2322	0	2323
s_1_1_contig100497	14864	s_1_1NewScaffoldedcontig_77053	s_1_1NewScaffoldedcontig_77053	20475	1	26117.7	28964	0	266	14768	5977	20475	1	1	14497	14497	4	14503
s_1_1_contig100497	14864	s_1_1NewScaffoldedcontig_77052	s_1_1NewScaffoldedcontig_77052	1887	1	3404.24	3774	0	7187	9073	1887	1	1	-1	1887	1887	0	1887
s_1_1_contig100497	14864	s_1_1NewScaffoldedcontig_14105	s_1_1NewScaffoldedcontig_14105	12854	1	165.393	182	2.89e-37	14764	14864	2930	3032	1	1	99	99	2	103
s_1_1_contig100510	8489	s_1_1NewScaffoldedcontig_153580	s_1_1NewScaffoldedcontig_153580	582	1	1045.44	1158	0	1912	2493	1	582	1	1	581	581	0	582
s_1_1_contig100510	8489	s_1_1NewScaffoldedcontig_7657	s_1_1NewScaffoldedcontig_7657	26263	1	190.64	210	4.14e-45	1145	1302	558	402	1	-1	140	140	3	159
s_1_1_contig100510	8489	s_1_1NewScaffoldedcontig_26507	s_1_1NewScaffoldedcontig_26507	22276	1	14846.6	16464	0	203	8489	24	8354	1	1	8286	8286	46	8332
s_1_1_contig100513	8437	s_1_1NewScaffoldedcontig_601	s_1_1NewScaffoldedcontig_601	4570	1	7910.86	8772	0	912	5297	4386	1	1	-1	4386	4386	0	4386
s_1_1_contig100513	8437	s_1_1NewScaffoldedcontig_128765	s_1_1NewScaffoldedcontig_128765	767	1	1384.47	1534	0	7626	8392	767	1	1	-1	767	767	0	767
s_1_1_contig100513	8437	s_1_1NewScaffoldedcontig_19185	s_1_1NewScaffoldedcontig_19185	1352	1	2340.26	2594	0	6343	7669	1	1352	1	1	1327	1327	25	1352
s_1_1_contig100514	11407	s_1_1NewScaffoldedcontig_101403	s_1_1NewScaffoldedcontig_101403	1783	1	3216.69	3566	0	6677	8459	1783	1	1	-1	1783	1783	0	1783
s_1_1_contig100514	11407	s_1_1NewScaffoldedcontig_112742	s_1_1NewScaffoldedcontig_112742	12254	1	134.736	148	3.76e-28	3183	3289	7227	7333	1	1	94	94	0	107
s_1_1_contig100514	11407	s_1_1NewScaffoldedcontig_27876	s_1_1NewScaffoldedcontig_27876	28253	1	19389.3	21502	0	1	10791	17442	28253	1	1	10785	10785	23	10813
s_1_1_contig100517	9919	s_1_1NewScaffoldedcontig_2578	s_1_1NewScaffoldedcontig_2578	58131	1	17634.6	19556	0	1	9802	36781	46596	1	1	9800	9800	14	9816
s_1_1_contig100517	9919	s_1_1NewScaffoldedcontig_84137	s_1_1NewScaffoldedcontig_84137	1858	1	141.949	156	2.2e-30	2998	3101	543	439	1	-1	95	95	1	105
s_1_1_contig100517	9919	s_1_1NewScaffoldedcontig_66828	s_1_1NewScaffoldedcontig_66828	22672	1	141.949	156	2.2e-30	2998	3101	5769	5873	1	1	95	95	1	105
s_1_1_contig100528	8405	s_1_1NewScaffoldedcontig_100649	s_1_1NewScaffoldedcontig_100649	2496	1	4486.26	4974	0	5208	7704	1	2496	1	1	2494	2494	1	2497
s_1_1_contig100528	8405	s_1_1NewScaffoldedcontig_157252	s_1_1NewScaffoldedcontig_157252	5284	1	9530.29	10568	0	1	5284	1	5284	1	1	5284	5284	0	5284
s_1_1_contig100528	8405	s_1_1NewScaffoldedcontig_6359	s_1_1NewScaffoldedcontig_6359	56970	1	949.858	1052	0	7658	8183	56970	56445	1	-1	526	526	0	526
s_1_1_contig100529	8480	s_1_1NewScaffoldedcontig_38279	s_1_1NewScaffoldedcontig_38279	11793	1	352.943	390	5.74e-94	2515	2960	2514	2964	1	1	355	355	19	458
s_1_1_contig100529	8480	s_1_1NewScaffoldedcontig_72420	s_1_1NewScaffoldedcontig_72420	8097	1	13948.5	15468	0	728	8480	7785	31	1	-1	7747	7747	2	7755
s_1_1_contig100529	8480	s_1_1NewScaffoldedcontig_51018	s_1_1NewScaffoldedcontig_51018	2244	1	313.269	346	5.03e-82	2515	2954	1383	933	1	-1	343	343	15	453
s_1_1_contig100533	12099	s_1_1NewScaffoldedcontig_7028	s_1_1NewScaffoldedcontig_7028	34464	1	363.763	402	4.53e-97	8269	9160	15969	16854	1	1	627	627	20	899
s_1_1_contig100533	12099	s_1_1NewScaffoldedcontig_11736	s_1_1NewScaffoldedcontig_11736	21421	1	21535.3	23882	0	12	12097	599	12712	1	1	12033	12033	40	12120
s_1_1_contig100533	12099	s_1_1NewScaffoldedcontig_9101	s_1_1NewScaffoldedcontig_9101	7045	1	53.584	58	0.00107071	9032	9118	5211	5125	1	-1	64	64	0	87
s_1_1_contig100535	15586	s_1_1NewScaffoldedcontig_30070	s_1_1NewScaffoldedcontig_30070	20443	1	203.264	224	1.21e-48	15127	15324	8754	8950	1	1	167	167	5	200
s_1_1_contig100535	15586	s_1_1NewScaffoldedcontig_3045	s_1_1NewScaffoldedcontig_3045	11867	1	197.854	218	5.13e-47	4310	4518	5000	5209	1	1	173	173	5	212
s_1_1_contig100535	15586	s_1_1NewScaffoldedcontig_55551	s_1_1NewScaffoldedcontig_55551	31119	1	16202.8	17968	0	1	9020	22471	13452	1	-1	9010	9010	4	9022
s_1_1_contig100537	23699	s_1_1NewScaffoldedcontig_41593	s_1_1NewScaffoldedcontig_41593	20452	1	36377	40342	0	1	20261	93	20428	1	1	20261	20261	75	20336
s_1_1_contig100537	23699	s_1_1NewScaffoldedcontig_57641	s_1_1NewScaffoldedcontig_57641	9014	1	1339.39	1484	0	20250	20991	9014	8273	1	-1	742	742	0	742
s_1_1_contig100537	23699	s_1_1NewScaffoldedcontig_57640	s_1_1NewScaffoldedcontig_57640	2093	1	3775.74	4186	0	21052	23144	1	2093	1	1	2093	2093	0	2093
s_1_1_contig100538	12112	s_1_1NewScaffoldedcontig_66828	s_1_1NewScaffoldedcontig_66828	22672	1	60.7975	66	7.22e-06	11861	11908	5900	5853	1	-1	42	42	0	48
s_1_1_contig100538	12112	s_1_1NewScaffoldedcontig_26278	s_1_1NewScaffoldedcontig_26278	24368	1	21448.8	23786	0	1	11896	18213	6318	1	-1	11895	11895	0	11896
s_1_1_contig100538	12112	s_1_1NewScaffoldedcontig_18531	s_1_1NewScaffoldedcontig_18531	16408	1	60.7975	66	7.22e-06	11873	11923	16342	16392	1	1	44	44	0	51
s_1_1_contig100539	12386	s_1_1NewScaffoldedcontig_161027	s_1_1NewScaffoldedcontig_161027	3227	1	5820.76	6454	0	8250	11476	3227	1	1	-1	3227	3227	0	3227
s_1_1_contig100539	12386	s_1_1NewScaffoldedcontig_129044	s_1_1NewScaffoldedcontig_129044	1959	1	2901.1	3216	0	1	1608	1612	5	1	-1	1608	1608	0	1608
s_1_1_contig100539	12386	s_1_1NewScaffoldedcontig_90425	s_1_1NewScaffoldedcontig_90425	12988	1	9494.22	10528	0	1606	6893	7704	12988	1	1	5282	5282	5	5289
s_1_1_contig100542	8890	s_1_1NewScaffoldedcontig_2274	s_1_1NewScaffoldedcontig_2274	71020	1	46.3705	50	0.116638	7701	7738	25140	25103	1	-1	33	33	0	38
s_1_1_contig100542	8890	s_1_1NewScaffoldedcontig_3169	s_1_1NewScaffoldedcontig_3169	9717	1	7694.46	8532	0	4609	8890	8465	4178	1	-1	4281	4281	6	4288
s_1_1_contig100542	8890	s_1_1NewScaffoldedcontig_132081	s_1_1NewScaffoldedcontig_132081	1976	1	3469.16	3846	0	925	2850	1	1926	1	1	1925	1925	0	1926
s_1_1_contig100548	11149	s_1_1NewScaffoldedcontig_187770	s_1_1NewScaffoldedcontig_187770	1523	1	2742.41	3040	0	1511	3033	1	1523	1	1	1522	1522	0	1523
s_1_1_contig100548	11149	s_1_1NewScaffoldedcontig_66645	s_1_1NewScaffoldedcontig_66645	27434	1	15737.5	17452	0	2370	11149	1	8769	1	1	8761	8761	19	8784
s_1_1_contig100548	11149	s_1_1NewScaffoldedcontig_112617	s_1_1NewScaffoldedcontig_112617	6976	1	2895.69	3210	0	1	1626	1617	1	1	-1	1617	1617	9	1626
s_1_1_contig100549	11727	s_1_1NewScaffoldedcontig_27288	s_1_1NewScaffoldedcontig_27288	23808	1	19405.5	21520	0	964	11727	9187	19951	1	1	10764	10764	1	10765
s_1_1_contig100549	11727	s_1_1NewScaffoldedcontig_24713	s_1_1NewScaffoldedcontig_24713	2624	1	262.775	290	1.11e-66	514	912	1342	1767	1	1	317	317	43	434
s_1_1_contig100549	11727	s_1_1NewScaffoldedcontig_27202	s_1_1NewScaffoldedcontig_27202	24570	1	253.758	280	5.72e-64	514	912	7584	8009	1	1	315	315	43	434
s_1_1_contig100556	12379	s_1_1NewScaffoldedcontig_71281	s_1_1NewScaffoldedcontig_71281	4104	1	333.106	368	7.85e-88	3830	4160	2194	2528	1	1	279	279	6	336
s_1_1_contig100556	12379	s_1_1NewScaffoldedcontig_47394	s_1_1NewScaffoldedcontig_47394	33228	1	22287.3	24716	0	1	12370	16108	28481	1	1	12368	12368	4	12374
s_1_1_contig100556	12379	s_1_1NewScaffoldedcontig_50986	s_1_1NewScaffoldedcontig_50986	14893	1	338.516	374	1.85e-89	3830	4160	8777	8453	1	-1	279	279	12	334
s_1_1_contig100557	12885	s_1_1NewScaffoldedcontig_170724	s_1_1NewScaffoldedcontig_170724	1468	1	48.1739	52	0.0484939	12734	12785	1391	1340	1	-1	44	44	2	53
s_1_1_contig100557	12885	s_1_1NewScaffoldedcontig_39529	s_1_1NewScaffoldedcontig_39529	10427	1	17367.7	19260	0	1	9663	10372	706	1	-1	9654	9654	10	9670
s_1_1_contig100557	12885	s_1_1NewScaffoldedcontig_49749	s_1_1NewScaffoldedcontig_49749	1851	1	3204.07	3552	0	11110	12885	1851	76	1	-1	1776	1776	0	1776
s_1_1_contig100559	13544	s_1_1NewScaffoldedcontig_92796	s_1_1NewScaffoldedcontig_92796	2188	1	3847.87	4266	0	11386	13544	1	2175	1	1	2158	2158	16	2175
s_1_1_contig100559	13544	s_1_1NewScaffoldedcontig_72182	s_1_1NewScaffoldedcontig_72182	6734	1	147.359	162	7.07e-32	115	278	4550	4713	1	1	131	131	0	164
s_1_1_contig100559	13544	s_1_1NewScaffoldedcontig_700	s_1_1NewScaffoldedcontig_700	26166	1	20734.6	22994	0	1	11518	26166	14648	1	-1	11511	11511	1	11519
s_1_1_contig100560	13709	s_1_1NewScaffoldedcontig_61377	s_1_1NewScaffoldedcontig_61377	4928	1	5079.57	5632	0	2393	5208	1	2816	1	1	2816	2816	0	2816
s_1_1_contig100560	13709	s_1_1NewScaffoldedcontig_151280	s_1_1NewScaffoldedcontig_151280	2407	1	4149.03	4600	0	10438	12933	2407	1	1	-1	2405	2405	89	2496
s_1_1_contig100560	13709	s_1_1NewScaffoldedcontig_28646	s_1_1NewScaffoldedcontig_28646	10930	1	12972.9	14386	0	6504	13709	10930	3725	1	-1	7203	7203	2	7207
s_1_1_contig100561	15660	s_1_1NewScaffoldedcontig_99344	s_1_1NewScaffoldedcontig_99344	629	1	957.072	1060	0	625	1223	1	629	1	1	583	583	30	629
s_1_1_contig100561	15660	s_1_1NewScaffoldedcontig_52844	s_1_1NewScaffoldedcontig_52844	1586	1	134.736	148	5.16e-28	1201	1314	1488	1370	1	-1	105	105	7	120
s_1_1_contig100561	15660	s_1_1NewScaffoldedcontig_3698	s_1_1NewScaffoldedcontig_3698	37309	1	25906.7	28730	0	1258	15639	36220	21837	1	-1	14378	14378	2	14384
s_1_1_contig100562	12682	s_1_1NewScaffoldedcontig_144659	s_1_1NewScaffoldedcontig_144659	14772	1	100.472	110	8.62e-18	11525	11688	828	988	1	1	121	121	3	164
s_1_1_contig100562	12682	s_1_1NewScaffoldedcontig_2250	s_1_1NewScaffoldedcontig_2250	44123	1	71.6177	78	4.18e-09	160	273	8142	8029	1	-1	84	84	0	114
s_1_1_contig100562	12682	s_1_1NewScaffoldedcontig_41314	s_1_1NewScaffoldedcontig_41314	12182	1	10825.1	12004	0	6549	12600	6091	12182	1	1	6049	6049	40	6092
s_1_1_contig100568	17116	s_1_1NewScaffoldedcontig_125191	s_1_1NewScaffoldedcontig_125191	698	1	1218.56	1350	0	2239	2913	24	698	1	1	675	675	0	675
s_1_1_contig100568	17116	s_1_1NewScaffoldedcontig_47810	s_1_1NewScaffoldedcontig_47810	40921	1	28555.8	31668	0	1201	17056	9524	25381	1	1	15850	15850	2	15858
s_1_1_contig100568	17116	s_1_1NewScaffoldedcontig_75126	s_1_1NewScaffoldedcontig_75126	30186	1	221.297	244	4.94e-54	10272	10513	12834	13075	1	1	194	194	0	242
s_1_1_contig100578	12183	s_1_1NewScaffoldedcontig_85694	s_1_1NewScaffoldedcontig_85694	12774	1	1806.46	2002	0	10844	11847	11767	10764	1	-1	1003	1003	0	1004
s_1_1_contig100578	12183	s_1_1NewScaffoldedcontig_12749	s_1_1NewScaffoldedcontig_12749	11647	1	96.8649	106	1.01e-16	1485	1557	10962	10890	1	-1	65	65	0	73
s_1_1_contig100578	12183	s_1_1NewScaffoldedcontig_47792	s_1_1NewScaffoldedcontig_47792	15065	1	17429	19328	0	1	9803	1	9760	1	1	9741	9741	55	9809
s_1_1_contig100579	10271	s_1_1NewScaffoldedcontig_49521	s_1_1NewScaffoldedcontig_49521	14838	1	396.224	438	6.51e-107	9535	9826	12281	12572	1	1	263	263	0	292
s_1_1_contig100579	10271	s_1_1NewScaffoldedcontig_56129	s_1_1NewScaffoldedcontig_56129	24392	1	16595.9	18404	0	73	9278	9207	1	1	-1	9206	9206	1	9207
s_1_1_contig100579	10271	s_1_1NewScaffoldedcontig_134955	s_1_1NewScaffoldedcontig_134955	848	1	1321.35	1464	0	9383	10114	848	117	1	-1	732	732	0	732
s_1_1_contig100580	27282	s_1_1NewScaffoldedcontig_142458	s_1_1NewScaffoldedcontig_142458	2459	1	881.33	976	0	26787	27274	2459	1972	1	-1	488	488	0	488
s_1_1_contig100580	27282	s_1_1NewScaffoldedcontig_1841	s_1_1NewScaffoldedcontig_1841	49399	1	47368.6	52532	0	1	26284	20783	47066	1	1	26279	26279	2	26285
s_1_1_contig100580	27282	s_1_1NewScaffoldedcontig_58918	s_1_1NewScaffoldedcontig_58918	13934	1	129.325	142	3.83e-26	6614	6759	4878	5023	1	1	116	116	0	146
s_1_1_contig100581	8665	s_1_1NewScaffoldedcontig_17098	s_1_1NewScaffoldedcontig_17098	8564	1	241.134	266	2.67e-60	605	901	1845	2141	1	1	236	236	4	299
s_1_1_contig100581	8665	s_1_1NewScaffoldedcontig_20195	s_1_1NewScaffoldedcontig_20195	17858	1	169	186	1.38e-38	633	901	9750	9482	1	-1	203	203	4	271
s_1_1_contig100581	8665	s_1_1NewScaffoldedcontig_11350	s_1_1NewScaffoldedcontig_11350	14934	1	14904.3	16528	0	1	8269	8525	257	1	-1	8267	8267	0	8269
s_1_1_contig100583	11161	s_1_1NewScaffoldedcontig_162183	s_1_1NewScaffoldedcontig_162183	956	1	1196.92	1326	0	773	1518	740	1	1	-1	706	706	6	746
s_1_1_contig100583	11161	s_1_1NewScaffoldedcontig_82395	s_1_1NewScaffoldedcontig_82395	2348	1	4215.76	4674	0	3520	5873	2348	1	1	-1	2347	2347	6	2354
s_1_1_contig100583	11161	s_1_1NewScaffoldedcontig_14709	s_1_1NewScaffoldedcontig_14709	122913	1	15759.1	17476	0	1498	10235	60647	69384	1	1	8738	8738	0	8738
s_1_1_contig100584	11971	s_1_1NewScaffoldedcontig_128421	s_1_1NewScaffoldedcontig_128421	13375	1	4524.14	5016	0	9435	11971	13375	10813	1	-1	2537	2537	26	2563
s_1_1_contig100584	11971	s_1_1NewScaffoldedcontig_7602	s_1_1NewScaffoldedcontig_7602	30162	1	4845.13	5372	0	3741	6426	26648	29333	1	1	2686	2686	0	2686
s_1_1_contig100584	11971	s_1_1NewScaffoldedcontig_16767	s_1_1NewScaffoldedcontig_16767	3009	1	1813.67	2010	0	8076	9080	1005	1	1	-1	1005	1005	0	1005
s_1_1_contig100586	9976	s_1_1NewScaffoldedcontig_2759	s_1_1NewScaffoldedcontig_2759	18546	1	574.758	636	1.14e-160	3182	3780	3198	2594	1	-1	491	491	6	605
s_1_1_contig100586	9976	s_1_1NewScaffoldedcontig_92279	s_1_1NewScaffoldedcontig_92279	5228	1	751.488	832	0	620	1042	4808	5228	1	1	421	421	2	423
s_1_1_contig100586	9976	s_1_1NewScaffoldedcontig_34455	s_1_1NewScaffoldedcontig_34455	9416	1	8002.83	8874	0	931	5380	9316	4864	1	-1	4447	4447	3	4453
s_1_1_contig100589	11258	s_1_1NewScaffoldedcontig_15378	s_1_1NewScaffoldedcontig_15378	44471	1	214.084	236	4.82e-52	11091	11258	23086	23253	1	1	148	148	0	168
s_1_1_contig100589	11258	s_1_1NewScaffoldedcontig_152675	s_1_1NewScaffoldedcontig_152675	1078	1	203.264	224	8.71e-49	11085	11258	656	828	1	1	150	150	1	174
s_1_1_contig100589	11258	s_1_1NewScaffoldedcontig_4748	s_1_1NewScaffoldedcontig_4748	22287	1	16859.2	18696	0	1	9358	18042	8686	1	-1	9356	9356	3	9359
s_1_1_contig100591	21546	s_1_1NewScaffoldedcontig_143636	s_1_1NewScaffoldedcontig_143636	520	1	939.038	1040	0	1	520	1	520	1	1	520	520	0	520
s_1_1_contig100591	21546	s_1_1NewScaffoldedcontig_9007	s_1_1NewScaffoldedcontig_9007	61586	1	21291.9	23612	0	883	12688	60303	48498	1	-1	11806	11806	0	11806
s_1_1_contig100591	21546	s_1_1NewScaffoldedcontig_123332	s_1_1NewScaffoldedcontig_123332	1974	1	3555.73	3942	0	5727	7700	1974	1	1	-1	1973	1973	0	1974
s_1_1_contig100592	11475	s_1_1NewScaffoldedcontig_110300	s_1_1NewScaffoldedcontig_110300	1895	1	2746.01	3044	0	6669	8190	1	1522	1	1	1522	1522	0	1522
s_1_1_contig100592	11475	s_1_1NewScaffoldedcontig_123501	s_1_1NewScaffoldedcontig_123501	22728	1	3871.32	4292	0	8460	10605	22728	20583	1	-1	2146	2146	0	2146
s_1_1_contig100592	11475	s_1_1NewScaffoldedcontig_49860	s_1_1NewScaffoldedcontig_49860	35909	1	10001	11090	0	24	5568	5545	1	1	-1	5545	5545	0	5545
s_1_1_contig100593	13465	s_1_1NewScaffoldedcontig_55777	s_1_1NewScaffoldedcontig_55777	3049	1	257.365	284	5.4e-65	1	234	2737	2495	1	-1	205	205	19	248
s_1_1_contig100593	13465	s_1_1NewScaffoldedcontig_58859	s_1_1NewScaffoldedcontig_58859	3289	1	5914.53	6558	0	6807	10095	3289	1	1	-1	3285	3285	0	3289
s_1_1_contig100593	13465	s_1_1NewScaffoldedcontig_13059	s_1_1NewScaffoldedcontig_13059	39508	1	23773.3	26364	0	135	13426	14816	28177	1	1	13281	13281	82	13368
s_1_1_contig100594	16528	s_1_1NewScaffoldedcontig_42823	s_1_1NewScaffoldedcontig_42823	15629	1	14711.4	16314	0	7319	15475	7473	15629	1	1	8157	8157	0	8157
s_1_1_contig100594	16528	s_1_1NewScaffoldedcontig_1183	s_1_1NewScaffoldedcontig_1183	709	1	1279.87	1418	0	15381	16089	709	1	1	-1	709	709	0	709
s_1_1_contig100594	16528	s_1_1NewScaffoldedcontig_42822	s_1_1NewScaffoldedcontig_42822	2009	1	2176.15	2412	0	4620	5833	1	1214	1	1	1211	1211	0	1214
s_1_1_contig100595	17034	s_1_1NewScaffoldedcontig_23628	s_1_1NewScaffoldedcontig_23628	19064	1	100.472	110	1.16e-17	2899	3084	977	1167	1	1	138	138	7	192
s_1_1_contig100595	17034	s_1_1NewScaffoldedcontig_47466	s_1_1NewScaffoldedcontig_47466	8753	1	98.6682	108	4.04e-17	2890	3082	4881	5071	1	1	138	138	2	193
s_1_1_contig100595	17034	s_1_1NewScaffoldedcontig_17008	s_1_1NewScaffoldedcontig_17008	41025	1	29259.1	32448	0	747	17004	24745	41006	1	1	16246	16246	4	16262
s_1_1_contig100596	10762	s_1_1NewScaffoldedcontig_103287	s_1_1NewScaffoldedcontig_103287	2718	1	95.0615	104	3.11e-16	7652	7708	2704	2648	1	-1	55	55	0	57
s_1_1_contig100596	10762	s_1_1NewScaffoldedcontig_28026	s_1_1NewScaffoldedcontig_28026	77249	1	13279.5	14726	0	264	7673	33157	40608	1	1	7410	7410	42	7452
s_1_1_contig100596	10762	s_1_1NewScaffoldedcontig_13502	s_1_1NewScaffoldedcontig_13502	5571	1	98.6682	108	2.55e-17	7652	7708	4821	4877	1	1	56	56	0	57
s_1_1_contig100598	10023	s_1_1NewScaffoldedcontig_47971	s_1_1NewScaffoldedcontig_47971	18913	1	127.522	140	4.9e-26	9948	10022	15049	15123	1	1	73	73	0	75
s_1_1_contig100598	10023	s_1_1NewScaffoldedcontig_86874	s_1_1NewScaffoldedcontig_86874	15686	1	127.522	140	4.9e-26	9949	10023	7964	7890	1	-1	73	73	0	75
s_1_1_contig100598	10023	s_1_1NewScaffoldedcontig_4385	s_1_1NewScaffoldedcontig_4385	62875	1	17953.8	19910	0	1	9969	25974	35943	1	1	9965	9965	1	9970
s_1_1_contig100600	11069	s_1_1NewScaffoldedcontig_60627	s_1_1NewScaffoldedcontig_60627	1321	1	854.28	946	0	10597	11069	1	473	1	1	473	473	0	473
s_1_1_contig100600	11069	s_1_1NewScaffoldedcontig_80882	s_1_1NewScaffoldedcontig_80882	13424	1	428.685	474	1.19e-116	10583	11069	12421	11933	1	-1	396	396	12	494
s_1_1_contig100600	11069	s_1_1NewScaffoldedcontig_24055	s_1_1NewScaffoldedcontig_24055	10279	1	9557.34	10598	0	106	5409	1	5303	1	1	5303	5303	1	5304
s_1_1_contig100602	9615	s_1_1NewScaffoldedcontig_24644	s_1_1NewScaffoldedcontig_24644	43484	1	17283	19166	0	30	9615	33899	43484	1	1	9585	9585	0	9586
s_1_1_contig100602	9615	s_1_1NewScaffoldedcontig_128829	s_1_1NewScaffoldedcontig_128829	2142	1	3855.09	4274	0	3434	5575	2142	1	1	-1	2140	2140	0	2142
s_1_1_contig100602	9615	s_1_1NewScaffoldedcontig_161022	s_1_1NewScaffoldedcontig_161022	2436	1	60.7975	66	5.73e-06	4109	4159	1589	1639	1	1	44	44	0	51
s_1_1_contig100603	24490	s_1_1NewScaffoldedcontig_186575	s_1_1NewScaffoldedcontig_186575	590	1	1065.27	1180	0	4847	5436	590	1	1	-1	590	590	0	590
s_1_1_contig100603	24490	s_1_1NewScaffoldedcontig_64241	s_1_1NewScaffoldedcontig_64241	18883	1	33917.2	37614	0	5642	24490	30	18883	1	1	18839	18839	11	18857
s_1_1_contig100603	24490	s_1_1NewScaffoldedcontig_17963	s_1_1NewScaffoldedcontig_17963	4967	1	8718.77	9668	0	1	4837	131	4967	1	1	4836	4836	0	4837
s_1_1_contig100605	14620	s_1_1NewScaffoldedcontig_58304	s_1_1NewScaffoldedcontig_58304	4150	1	7420.35	8228	0	78	4191	37	4150	1	1	4114	4114	0	4114
s_1_1_contig100605	14620	s_1_1NewScaffoldedcontig_2419	s_1_1NewScaffoldedcontig_2419	24028	1	13131.6	14562	0	4237	11540	1	7306	1	1	7299	7299	4	7307
s_1_1_contig100605	14620	s_1_1NewScaffoldedcontig_142206	s_1_1NewScaffoldedcontig_142206	6234	1	206.87	228	9.3e-50	1964	2175	3591	3801	1	1	176	176	3	213
s_1_1_contig100607	8865	s_1_1NewScaffoldedcontig_35467	s_1_1NewScaffoldedcontig_35467	18970	1	154.573	170	3.12e-34	1542	2035	17800	18289	1	1	352	352	46	515
s_1_1_contig100607	8865	s_1_1NewScaffoldedcontig_54576	s_1_1NewScaffoldedcontig_54576	1039	1	1869.58	2072	0	7825	8863	1	1039	1	1	1038	1038	0	1039
s_1_1_contig100607	8865	s_1_1NewScaffoldedcontig_23143	s_1_1NewScaffoldedcontig_23143	11982	1	13887.2	15400	0	45	7757	11982	4270	1	-1	7710	7710	2	7714
s_1_1_contig100609	8763	s_1_1NewScaffoldedcontig_4343	s_1_1NewScaffoldedcontig_4343	29441	1	14202.8	15750	0	874	8763	28482	20593	1	-1	7884	7884	0	7890
s_1_1_contig100609	8763	s_1_1NewScaffoldedcontig_77679	s_1_1NewScaffoldedcontig_77679	1883	1	183.427	202	6.35e-43	46	208	1665	1491	1	-1	144	144	12	175
s_1_1_contig100609	8763	s_1_1NewScaffoldedcontig_35438	s_1_1NewScaffoldedcontig_35438	8536	1	197.854	218	2.88e-47	45	205	8269	8092	1	-1	148	148	17	178
s_1_1_contig100613	14313	s_1_1NewScaffoldedcontig_56261	s_1_1NewScaffoldedcontig_56261	31051	1	25594.7	28384	0	1	14313	5272	19553	1	1	14266	14266	55	14325
s_1_1_contig100613	14313	s_1_1NewScaffoldedcontig_124148	s_1_1NewScaffoldedcontig_124148	2761	1	4956.94	5496	0	10549	13309	1	2761	1	1	2756	2756	0	2761
s_1_1_contig100613	14313	s_1_1NewScaffoldedcontig_101160	s_1_1NewScaffoldedcontig_101160	4316	1	475.572	526	1.18e-130	15	566	1545	2106	1	1	452	452	36	575
s_1_1_contig100614	10292	s_1_1NewScaffoldedcontig_36197	s_1_1NewScaffoldedcontig_36197	919	1	1635.14	1812	0	875	1793	1	919	1	1	916	916	2	920
s_1_1_contig100614	10292	s_1_1NewScaffoldedcontig_156205	s_1_1NewScaffoldedcontig_156205	1310	1	2132.87	2364	0	1710	2960	1	1310	1	1	1250	1250	59	1310
s_1_1_contig100614	10292	s_1_1NewScaffoldedcontig_52978	s_1_1NewScaffoldedcontig_52978	18068	1	9871.12	10946	0	4792	10264	4748	10220	1	1	5473	5473	0	5473
s_1_1_contig100618	10484	s_1_1NewScaffoldedcontig_64635	s_1_1NewScaffoldedcontig_64635	24989	1	55.3874	60	0.000265697	2482	2543	17524	17584	1	1	50	50	1	62
s_1_1_contig100618	10484	s_1_1NewScaffoldedcontig_48216	s_1_1NewScaffoldedcontig_48216	37138	1	9389.62	10412	0	5276	10484	31930	37138	1	1	5208	5208	0	5209
s_1_1_contig100618	10484	s_1_1NewScaffoldedcontig_2320	s_1_1NewScaffoldedcontig_2320	13931	1	57.1907	62	7.61e-05	2464	2523	10879	10936	1	1	49	49	2	60
s_1_1_contig100620	13983	s_1_1NewScaffoldedcontig_1884	s_1_1NewScaffoldedcontig_1884	61554	1	96.8649	106	1.16e-16	11814	11981	22901	23070	1	1	124	124	2	170
s_1_1_contig100620	13983	s_1_1NewScaffoldedcontig_3310	s_1_1NewScaffoldedcontig_3310	38714	1	25111.4	27848	0	1	13983	18131	4100	1	-1	13982	13982	49	14032
s_1_1_contig100620	13983	s_1_1NewScaffoldedcontig_882	s_1_1NewScaffoldedcontig_882	52214	1	300.646	332	5.25e-78	55	265	41172	40962	1	-1	193	193	0	211
s_1_1_contig100632	14927	s_1_1NewScaffoldedcontig_39662	s_1_1NewScaffoldedcontig_39662	20064	1	16907.9	18750	0	5525	14927	7866	17293	1	1	9403	9403	25	9428
s_1_1_contig100632	14927	s_1_1NewScaffoldedcontig_159103	s_1_1NewScaffoldedcontig_159103	2173	1	3910.99	4336	0	11236	13408	2173	1	1	-1	2171	2171	0	2173
s_1_1_contig100632	14927	s_1_1NewScaffoldedcontig_27022	s_1_1NewScaffoldedcontig_27022	1294	1	95.0615	104	4.32e-16	14845	14927	512	424	1	-1	74	74	6	89
s_1_1_contig100633	16288	s_1_1NewScaffoldedcontig_12361	s_1_1NewScaffoldedcontig_12361	50753	1	179.82	198	1.44e-41	1	140	3945	3780	1	-1	135	135	26	166
s_1_1_contig100633	16288	s_1_1NewScaffoldedcontig_50013	s_1_1NewScaffoldedcontig_50013	37717	1	28804.7	31944	0	280	16266	8732	24717	1	1	15982	15982	1	15987
s_1_1_contig100633	16288	s_1_1NewScaffoldedcontig_94610	s_1_1NewScaffoldedcontig_94610	1874	1	3330.31	3692	0	12491	14387	1	1874	1	1	1874	1874	23	1897
s_1_1_contig100635	8245	s_1_1NewScaffoldedcontig_61424	s_1_1NewScaffoldedcontig_61424	8075	1	13174.9	14610	0	931	8245	762	8075	1	1	7312	7312	1	7315
s_1_1_contig100635	8245	s_1_1NewScaffoldedcontig_32788	s_1_1NewScaffoldedcontig_32788	23788	1	53.584	58	0.000728656	7261	7300	20614	20574	1	-1	37	37	1	41
s_1_1_contig100635	8245	s_1_1NewScaffoldedcontig_26695	s_1_1NewScaffoldedcontig_26695	2286	1	51.7806	56	0.00254326	3077	3188	535	647	1	1	81	81	3	114
s_1_1_contig100637	11720	s_1_1NewScaffoldedcontig_135524	s_1_1NewScaffoldedcontig_135524	5302	1	9514.06	10550	0	6294	11571	5302	25	1	-1	5277	5277	0	5278
s_1_1_contig100637	11720	s_1_1NewScaffoldedcontig_133322	s_1_1NewScaffoldedcontig_133322	6241	1	11256.1	12482	0	69	6309	1	6241	1	1	6241	6241	0	6241
s_1_1_contig100637	11720	s_1_1NewScaffoldedcontig_99775	s_1_1NewScaffoldedcontig_99775	900	1	143.752	158	7.45e-31	1	89	109	197	1	1	85	85	0	89
s_1_1_contig100638	11789	s_1_1NewScaffoldedcontig_130018	s_1_1NewScaffoldedcontig_130018	647	1	329.499	364	9.11e-87	2	277	364	86	1	-1	244	244	5	280
s_1_1_contig100638	11789	s_1_1NewScaffoldedcontig_106834	s_1_1NewScaffoldedcontig_106834	1908	1	320.483	354	4.72e-84	2	277	1427	1710	1	1	244	244	10	285
s_1_1_contig100638	11789	s_1_1NewScaffoldedcontig_48622	s_1_1NewScaffoldedcontig_48622	21480	1	15194.7	16850	0	3197	11621	8614	190	1	-1	8425	8425	0	8425
s_1_1_contig100639	12378	s_1_1NewScaffoldedcontig_101599	s_1_1NewScaffoldedcontig_101599	3206	1	5768.46	6396	0	8731	11936	1	3206	1	1	3203	3203	0	3206
s_1_1_contig100639	12378	s_1_1NewScaffoldedcontig_75405	s_1_1NewScaffoldedcontig_75405	36271	1	10103.8	11204	0	6774	12378	29719	24115	1	-1	5604	5604	0	5605
s_1_1_contig100639	12378	s_1_1NewScaffoldedcontig_159294	s_1_1NewScaffoldedcontig_159294	616	1	688.37	762	0	6411	6791	381	1	1	-1	381	381	0	381
s_1_1_contig100644	8199	s_1_1NewScaffoldedcontig_4826	s_1_1NewScaffoldedcontig_4826	27746	1	11209.2	12430	0	1976	8199	20064	13843	1	-1	6221	6221	2	6224
s_1_1_contig100644	8199	s_1_1NewScaffoldedcontig_55661	s_1_1NewScaffoldedcontig_55661	3400	1	169	186	1.31e-38	8089	8195	108	1	1	-1	103	103	1	108
s_1_1_contig100644	8199	s_1_1NewScaffoldedcontig_13063	s_1_1NewScaffoldedcontig_13063	5649	1	172.606	190	1.07e-39	8089	8199	1035	924	1	-1	106	106	1	112
s_1_1_contig100646	9894	s_1_1NewScaffoldedcontig_88289	s_1_1NewScaffoldedcontig_88289	5102	1	477.376	528	2.33e-131	8387	8820	830	393	1	-1	371	371	8	440
s_1_1_contig100646	9894	s_1_1NewScaffoldedcontig_72110	s_1_1NewScaffoldedcontig_72110	14402	1	17376.7	19270	0	1	9645	9644	1	1	-1	9642	9642	1	9645
s_1_1_contig100646	9894	s_1_1NewScaffoldedcontig_126716	s_1_1NewScaffoldedcontig_126716	4467	1	536.887	594	2.84e-149	9407	9894	2001	1502	1	-1	421	421	18	503
s_1_1_contig100649	21713	s_1_1NewScaffoldedcontig_124260	s_1_1NewScaffoldedcontig_124260	4669	1	8341.87	9250	0	16072	20732	1	4669	1	1	4653	4653	8	4669
s_1_1_contig100649	21713	s_1_1NewScaffoldedcontig_70602	s_1_1NewScaffoldedcontig_70602	1748	1	3007.5	3334	0	1928	3727	1740	1	1	-1	1740	1740	60	1800
s_1_1_contig100649	21713	s_1_1NewScaffoldedcontig_36861	s_1_1NewScaffoldedcontig_36861	24815	1	27055.4	30004	0	22	15031	9349	24358	1	1	15007	15007	0	15010
s_1_1_contig100652	15205	s_1_1NewScaffoldedcontig_184783	s_1_1NewScaffoldedcontig_184783	549	1	991.336	1098	0	408	956	549	1	1	-1	549	549	0	549
s_1_1_contig100652	15205	s_1_1NewScaffoldedcontig_28039	s_1_1NewScaffoldedcontig_28039	21509	1	17805.9	19746	0	5302	15205	1	9930	1	1	9903	9903	26	9930
s_1_1_contig100652	15205	s_1_1NewScaffoldedcontig_59417	s_1_1NewScaffoldedcontig_59417	4291	1	7712.49	8552	0	963	5241	13	4291	1	1	4278	4278	0	4279
s_1_1_contig100653	11201	s_1_1NewScaffoldedcontig_180339	s_1_1NewScaffoldedcontig_180339	795	1	51.7806	56	0.00345896	567	597	791	761	1	-1	30	30	0	31
s_1_1_contig100653	11201	s_1_1NewScaffoldedcontig_42830	s_1_1NewScaffoldedcontig_42830	43673	1	20092.6	22282	0	2	11201	11194	1	1	-1	11174	11174	6	11200
s_1_1_contig100653	11201	s_1_1NewScaffoldedcontig_99787	s_1_1NewScaffoldedcontig_99787	2256	1	4069.69	4512	0	2816	5071	2256	1	1	-1	2256	2256	0	2256
s_1_1_contig100658	8086	s_1_1NewScaffoldedcontig_53238	s_1_1NewScaffoldedcontig_53238	25257	1	116.702	128	7.14e-23	741	819	41	119	1	1	73	73	0	79
s_1_1_contig100658	8086	s_1_1NewScaffoldedcontig_14011	s_1_1NewScaffoldedcontig_14011	59485	1	14561.7	16148	0	1	8086	48563	56647	1	1	8082	8082	1	8086
s_1_1_contig100658	8086	s_1_1NewScaffoldedcontig_22637	s_1_1NewScaffoldedcontig_22637	14545	1	116.702	128	7.14e-23	741	819	73	151	1	1	73	73	0	79
s_1_1_contig100660	11331	s_1_1NewScaffoldedcontig_147531	s_1_1NewScaffoldedcontig_147531	1042	1	609.022	674	6.28e-171	8509	9563	1042	2	1	-1	799	799	94	1095
s_1_1_contig100660	11331	s_1_1NewScaffoldedcontig_5864	s_1_1NewScaffoldedcontig_5864	27021	1	18924	20986	0	356	10880	11620	1077	1	-1	10523	10523	21	10545
s_1_1_contig100660	11331	s_1_1NewScaffoldedcontig_2360	s_1_1NewScaffoldedcontig_2360	14394	1	630.662	698	1.92e-177	8456	9546	2347	3487	1	1	845	845	88	1160
s_1_1_contig100663	12737	s_1_1NewScaffoldedcontig_21046	s_1_1NewScaffoldedcontig_21046	24447	1	98.6682	108	3.02e-17	547	694	2863	3005	1	1	113	113	9	150
s_1_1_contig100663	12737	s_1_1NewScaffoldedcontig_176398	s_1_1NewScaffoldedcontig_176398	1078	1	1802.85	1998	0	1	1040	1	1078	1	1	1040	1040	38	1078
s_1_1_contig100663	12737	s_1_1NewScaffoldedcontig_12182	s_1_1NewScaffoldedcontig_12182	28358	1	21100.7	23400	0	1017	12729	28358	16647	1	-1	11711	11711	3	11714
s_1_1_contig100665	9139	s_1_1NewScaffoldedcontig_15737	s_1_1NewScaffoldedcontig_15737	49012	1	149.163	164	1.37e-32	29	123	31211	31305	1	1	90	90	0	95
s_1_1_contig100665	9139	s_1_1NewScaffoldedcontig_43780	s_1_1NewScaffoldedcontig_43780	15762	1	11638.4	12906	0	2632	9102	6474	1	1	-1	6466	6466	3	6474
s_1_1_contig100665	9139	s_1_1NewScaffoldedcontig_155701	s_1_1NewScaffoldedcontig_155701	1371	1	145.556	160	1.66e-31	29	123	616	710	1	1	89	89	0	95
s_1_1_contig100666	12518	s_1_1NewScaffoldedcontig_1713	s_1_1NewScaffoldedcontig_1713	53754	1	8408.59	9324	0	2052	6722	44580	49248	1	1	4669	4669	2	4671
s_1_1_contig100666	12518	s_1_1NewScaffoldedcontig_5235	s_1_1NewScaffoldedcontig_5235	3983	1	77.0278	84	9.71e-11	1975	2101	1078	1209	1	1	97	97	5	132
s_1_1_contig100666	12518	s_1_1NewScaffoldedcontig_137951	s_1_1NewScaffoldedcontig_137951	1133	1	1986.8	2202	0	11171	12279	1133	25	1	-1	1108	1108	2	1110
s_1_1_contig100671	9886	s_1_1NewScaffoldedcontig_55375	s_1_1NewScaffoldedcontig_55375	17360	1	255.561	282	1.38e-64	8625	8819	14338	14529	1	1	175	175	5	196
s_1_1_contig100671	9886	s_1_1NewScaffoldedcontig_125774	s_1_1NewScaffoldedcontig_125774	1170	1	2030.08	2250	0	261	1385	1	1125	1	1	1125	1125	0	1125
s_1_1_contig100671	9886	s_1_1NewScaffoldedcontig_46568	s_1_1NewScaffoldedcontig_46568	11345	1	14678.9	16278	0	1433	9606	1	8183	1	1	8167	8167	11	8184
s_1_1_contig100672	8845	s_1_1NewScaffoldedcontig_7989	s_1_1NewScaffoldedcontig_7989	34886	1	105.882	116	1.41e-19	8778	8845	8648	8715	1	1	64	64	0	68
s_1_1_contig100672	8845	s_1_1NewScaffoldedcontig_25719	s_1_1NewScaffoldedcontig_25719	56961	1	113.095	124	9.52e-22	1	67	17	83	1	1	65	65	0	67
s_1_1_contig100672	8845	s_1_1NewScaffoldedcontig_27619	s_1_1NewScaffoldedcontig_27619	33077	1	15838.5	17564	0	1	8815	8827	1	1	-1	8810	8810	14	8828
s_1_1_contig100675	8014	s_1_1NewScaffoldedcontig_98796	s_1_1NewScaffoldedcontig_98796	11095	1	5990.27	6642	0	292	3612	3773	7093	1	1	3321	3321	0	3321
s_1_1_contig100675	8014	s_1_1NewScaffoldedcontig_28093	s_1_1NewScaffoldedcontig_28093	14748	1	343.926	380	2.81e-91	80	429	12366	12730	1	1	294	294	15	365
s_1_1_contig100675	8014	s_1_1NewScaffoldedcontig_4292	s_1_1NewScaffoldedcontig_4292	14938	1	389.011	430	7.53e-105	82	648	4372	3769	1	-1	457	457	47	609
s_1_1_contig100680	16755	s_1_1NewScaffoldedcontig_56261	s_1_1NewScaffoldedcontig_56261	31051	1	688.37	762	0	5256	6201	4896	5845	1	1	740	740	36	966
s_1_1_contig100680	16755	s_1_1NewScaffoldedcontig_128895	s_1_1NewScaffoldedcontig_128895	2340	1	4149.03	4600	0	11435	13806	1	2340	1	1	2340	2340	32	2372
s_1_1_contig100680	16755	s_1_1NewScaffoldedcontig_22537	s_1_1NewScaffoldedcontig_22537	23095	1	30115.7	33398	0	1	16753	654	17392	1	1	16731	16731	22	16757
s_1_1_contig100681	8103	s_1_1NewScaffoldedcontig_58735	s_1_1NewScaffoldedcontig_58735	10586	1	5479.92	6076	0	5057	8103	10586	7539	1	-1	3045	3045	1	3048
s_1_1_contig100681	8103	s_1_1NewScaffoldedcontig_106204	s_1_1NewScaffoldedcontig_106204	3522	1	163.589	180	5.5e-37	5056	5166	2407	2518	1	1	104	104	1	112
s_1_1_contig100681	8103	s_1_1NewScaffoldedcontig_88160	s_1_1NewScaffoldedcontig_88160	6637	1	8150.71	9038	0	1	4522	1488	6009	1	1	4521	4521	0	4522
s_1_1_contig100689	14263	s_1_1NewScaffoldedcontig_15797	s_1_1NewScaffoldedcontig_15797	29059	1	21598.4	23952	0	2088	14098	26408	14390	1	-1	12004	12004	14	12022
s_1_1_contig100689	14263	s_1_1NewScaffoldedcontig_42605	s_1_1NewScaffoldedcontig_42605	13974	1	210.477	232	7.44e-51	12624	12769	7452	7597	1	1	134	134	0	146
s_1_1_contig100689	14263	s_1_1NewScaffoldedcontig_14185	s_1_1NewScaffoldedcontig_14185	16003	1	208.674	230	2.6e-50	5243	5423	6784	6967	1	1	157	157	3	184
s_1_1_contig100696	10496	s_1_1NewScaffoldedcontig_117697	s_1_1NewScaffoldedcontig_117697	1263	1	2278.94	2526	0	9234	10496	1263	1	1	-1	1263	1263	0	1263
s_1_1_contig100696	10496	s_1_1NewScaffoldedcontig_28821	s_1_1NewScaffoldedcontig_28821	13044	1	11990.1	13296	0	1	6665	1	6666	1	1	6662	6662	3	6667
s_1_1_contig100696	10496	s_1_1NewScaffoldedcontig_117630	s_1_1NewScaffoldedcontig_117630	1763	1	2533.22	2808	0	7061	8464	1	1404	1	1	1404	1404	0	1404
s_1_1_contig100698	13952	s_1_1NewScaffoldedcontig_78166	s_1_1NewScaffoldedcontig_78166	3091	1	5575.5	6182	0	9478	12568	3091	1	1	-1	3091	3091	0	3091
s_1_1_contig100698	13952	s_1_1NewScaffoldedcontig_97126	s_1_1NewScaffoldedcontig_97126	2966	1	5326.63	5906	0	6315	9283	2966	1	1	-1	2964	2964	3	2969
s_1_1_contig100698	13952	s_1_1NewScaffoldedcontig_106452	s_1_1NewScaffoldedcontig_106452	4040	1	4549.38	5044	0	2021	4542	1	2522	1	1	2522	2522	0	2522
s_1_1_contig100699	9149	s_1_1NewScaffoldedcontig_77780	s_1_1NewScaffoldedcontig_77780	1254	1	2262.71	2508	0	1	1254	1254	1	1	-1	1254	1254	0	1254
s_1_1_contig100699	9149	s_1_1NewScaffoldedcontig_149215	s_1_1NewScaffoldedcontig_149215	7384	1	13279.5	14726	0	1231	8611	1	7384	1	1	7376	7376	3	7384
s_1_1_contig100699	9149	s_1_1NewScaffoldedcontig_10574	s_1_1NewScaffoldedcontig_10574	10956	1	1043.63	1156	0	8565	9142	10956	10379	1	-1	578	578	0	578
s_1_1_contig100700	13430	s_1_1NewScaffoldedcontig_21621	s_1_1NewScaffoldedcontig_21621	8083	1	194.247	214	5.39e-46	1243	1398	1195	1351	1	1	138	138	1	157
s_1_1_contig100700	13430	s_1_1NewScaffoldedcontig_48989	s_1_1NewScaffoldedcontig_48989	15529	1	23064.6	25578	0	16	12974	1	13100	1	1	12954	12954	145	13102
s_1_1_contig100700	13430	s_1_1NewScaffoldedcontig_97944	s_1_1NewScaffoldedcontig_97944	6109	1	190.64	210	6.56e-45	1242	1395	3562	3408	1	-1	136	136	1	155
s_1_1_contig100702	11769	s_1_1NewScaffoldedcontig_32559	s_1_1NewScaffoldedcontig_32559	27096	1	21091.7	23390	0	1	11721	15384	27096	1	1	11710	11710	8	11721
s_1_1_contig100702	11769	s_1_1NewScaffoldedcontig_90821	s_1_1NewScaffoldedcontig_90821	1729	1	165.393	182	2.29e-37	11601	11769	1495	1685	1	1	151	151	24	192
s_1_1_contig100702	11769	s_1_1NewScaffoldedcontig_138915	s_1_1NewScaffoldedcontig_138915	3921	1	7063.28	7832	0	6298	10218	3921	1	1	-1	3919	3919	0	3921
s_1_1_contig100704	12862	s_1_1NewScaffoldedcontig_30602	s_1_1NewScaffoldedcontig_30602	12705	1	22895.1	25390	0	119	12823	12705	1	1	-1	12701	12701	0	12705
s_1_1_contig100704	12862	s_1_1NewScaffoldedcontig_68444	s_1_1NewScaffoldedcontig_68444	2273	1	176.213	194	1.38e-40	25	140	1036	1152	1	1	110	110	1	117
s_1_1_contig100704	12862	s_1_1NewScaffoldedcontig_98890	s_1_1NewScaffoldedcontig_98890	517	1	178.016	196	3.97e-41	24	140	79	196	1	1	111	111	1	118
s_1_1_contig100705	8858	s_1_1NewScaffoldedcontig_39618	s_1_1NewScaffoldedcontig_39618	9205	1	51.7806	56	0.00273315	779	806	846	819	1	-1	28	28	0	28
s_1_1_contig100705	8858	s_1_1NewScaffoldedcontig_13095	s_1_1NewScaffoldedcontig_13095	28280	1	15905.2	17638	0	6	8858	23064	14193	1	-1	8850	8850	19	8872
s_1_1_contig100705	8858	s_1_1NewScaffoldedcontig_91014	s_1_1NewScaffoldedcontig_91014	2282	1	4085.92	4530	0	2582	4869	2282	1	1	-1	2280	2280	8	2289
s_1_1_contig100711	9072	s_1_1NewScaffoldedcontig_61499	s_1_1NewScaffoldedcontig_61499	20046	1	16092.7	17846	0	57	8999	18710	9769	1	-1	8936	8936	1	8943
s_1_1_contig100711	9072	s_1_1NewScaffoldedcontig_106279	s_1_1NewScaffoldedcontig_106279	2661	1	279.005	308	1.11e-71	2725	3036	1820	1508	1	-1	256	256	7	316
s_1_1_contig100711	9072	s_1_1NewScaffoldedcontig_55217	s_1_1NewScaffoldedcontig_55217	30824	1	279.005	308	1.11e-71	2727	3029	23383	23083	1	-1	252	252	10	307
s_1_1_contig100712	12782	s_1_1NewScaffoldedcontig_29405	s_1_1NewScaffoldedcontig_29405	6207	1	149.163	164	1.91e-32	9236	9365	3640	3765	1	1	111	111	4	130
s_1_1_contig100712	12782	s_1_1NewScaffoldedcontig_133369	s_1_1NewScaffoldedcontig_133369	691	1	1222.17	1354	0	1	697	691	1	1	-1	690	690	8	698
s_1_1_contig100712	12782	s_1_1NewScaffoldedcontig_86820	s_1_1NewScaffoldedcontig_86820	20466	1	12801.6	14196	0	2130	9235	10470	3365	1	-1	7105	7105	2	7107
s_1_1_contig100717	10772	s_1_1NewScaffoldedcontig_173512	s_1_1NewScaffoldedcontig_173512	738	1	484.589	536	1.71e-133	66	336	468	738	1	1	270	270	0	271
s_1_1_contig100717	10772	s_1_1NewScaffoldedcontig_93887	s_1_1NewScaffoldedcontig_93887	16700	1	9820.63	10890	0	4620	10076	12170	6713	1	-1	5455	5455	3	5459
s_1_1_contig100717	10772	s_1_1NewScaffoldedcontig_73862	s_1_1NewScaffoldedcontig_73862	18505	1	60.7975	66	6.42e-06	5349	5411	3890	3952	1	1	51	51	0	63
s_1_1_contig100721	8496	s_1_1NewScaffoldedcontig_110011	s_1_1NewScaffoldedcontig_110011	12332	1	7607.9	8436	0	6	4239	4234	1	1	-1	4230	4230	2	4235
s_1_1_contig100721	8496	s_1_1NewScaffoldedcontig_170452	s_1_1NewScaffoldedcontig_170452	566	1	152.769	168	1.04e-33	6388	6496	562	454	1	-1	99	99	0	109
s_1_1_contig100721	8496	s_1_1NewScaffoldedcontig_27718	s_1_1NewScaffoldedcontig_27718	24587	1	8374.33	9286	0	3839	8496	1	4656	1	1	4655	4655	4	4659
s_1_1_contig100725	11150	s_1_1NewScaffoldedcontig_71969	s_1_1NewScaffoldedcontig_71969	41007	1	143.752	158	7.09e-31	1	160	30653	30829	1	1	138	138	17	177
s_1_1_contig100725	11150	s_1_1NewScaffoldedcontig_20722	s_1_1NewScaffoldedcontig_20722	37378	1	18750.9	20794	0	753	11149	15910	26306	1	1	10397	10397	0	10397
s_1_1_contig100725	11150	s_1_1NewScaffoldedcontig_163178	s_1_1NewScaffoldedcontig_163178	588	1	1016.58	1126	0	144	720	1	588	1	1	577	577	11	588
s_1_1_contig100729	10837	s_1_1NewScaffoldedcontig_95465	s_1_1NewScaffoldedcontig_95465	1869	1	3268.99	3624	0	5235	7103	1869	1	1	-1	1844	1844	2	1870
s_1_1_contig100729	10837	s_1_1NewScaffoldedcontig_28868	s_1_1NewScaffoldedcontig_28868	10738	1	19313.6	21418	0	104	10837	1	10738	1	1	10730	10730	6	10739
s_1_1_contig100729	10837	s_1_1NewScaffoldedcontig_65327	s_1_1NewScaffoldedcontig_65327	13260	1	167.196	184	6.04e-38	5576	5697	8311	8431	1	1	111	111	1	122
s_1_1_contig100730	9083	s_1_1NewScaffoldedcontig_30008	s_1_1NewScaffoldedcontig_30008	10818	1	16339.8	18120	0	1	9082	486	9570	1	1	9079	9079	7	9087
s_1_1_contig100730	9083	s_1_1NewScaffoldedcontig_11622	s_1_1NewScaffoldedcontig_11622	57821	1	107.685	118	4.16e-20	7744	7807	11520	11583	1	1	62	62	0	64
s_1_1_contig100730	9083	s_1_1NewScaffoldedcontig_43893	s_1_1NewScaffoldedcontig_43893	7216	1	105.882	116	1.45e-19	7744	7806	1159	1221	1	1	61	61	0	63
s_1_1_contig100732	9829	s_1_1NewScaffoldedcontig_1606	s_1_1NewScaffoldedcontig_1606	18782	1	825.426	914	0	3844	4729	14290	13410	1	-1	730	730	61	914
s_1_1_contig100732	9829	s_1_1NewScaffoldedcontig_10262	s_1_1NewScaffoldedcontig_10262	50988	1	7068.69	7838	0	1	3934	9730	5795	1	-1	3930	3930	2	3936
s_1_1_contig100732	9829	s_1_1NewScaffoldedcontig_1208	s_1_1NewScaffoldedcontig_1208	66333	1	10707.9	11874	0	3893	9829	1	5937	1	1	5937	5937	0	5937
s_1_1_contig100735	8340	s_1_1NewScaffoldedcontig_57244	s_1_1NewScaffoldedcontig_57244	21889	1	158.179	174	2.41e-35	1	109	19605	19712	1	1	101	101	1	109
s_1_1_contig100735	8340	s_1_1NewScaffoldedcontig_42891	s_1_1NewScaffoldedcontig_42891	24355	1	15027	16664	0	1	8340	8340	1	1	-1	8337	8337	0	8340
s_1_1_contig100735	8340	s_1_1NewScaffoldedcontig_24760	s_1_1NewScaffoldedcontig_24760	2883	1	163.589	180	5.66e-37	1	109	1918	2027	1	1	103	103	1	110
s_1_1_contig100737	8831	s_1_1NewScaffoldedcontig_13956	s_1_1NewScaffoldedcontig_13956	3499	1	116.702	128	7.8e-23	5	113	3499	3386	1	-1	96	96	5	114
s_1_1_contig100737	8831	s_1_1NewScaffoldedcontig_59	s_1_1NewScaffoldedcontig_59	37613	1	109.488	120	1.16e-20	6119	6243	36919	37055	1	1	105	105	12	137
s_1_1_contig100737	8831	s_1_1NewScaffoldedcontig_8450	s_1_1NewScaffoldedcontig_8450	75535	1	15795.2	17516	0	49	8806	8758	1	1	-1	8758	8758	0	8758
s_1_1_contig100741	13679	s_1_1NewScaffoldedcontig_43225	s_1_1NewScaffoldedcontig_43225	35228	1	19106.2	21188	0	2797	13400	29253	18650	1	-1	10600	10600	0	10604
s_1_1_contig100741	13679	s_1_1NewScaffoldedcontig_109531	s_1_1NewScaffoldedcontig_109531	4146	1	7436.58	8246	0	5973	10133	4146	1	1	-1	4144	4144	15	4161
s_1_1_contig100741	13679	s_1_1NewScaffoldedcontig_125410	s_1_1NewScaffoldedcontig_125410	2645	1	3366.37	3732	0	1	1869	1	1869	1	1	1868	1868	0	1869
s_1_1_contig100745	9327	s_1_1NewScaffoldedcontig_13998	s_1_1NewScaffoldedcontig_13998	749	1	165.393	182	1.81e-37	9207	9327	286	406	1	1	109	109	0	121
s_1_1_contig100745	9327	s_1_1NewScaffoldedcontig_7709	s_1_1NewScaffoldedcontig_7709	21029	1	9322.9	10338	0	4103	9279	5177	1	1	-1	5174	5174	0	5177
s_1_1_contig100745	9327	s_1_1NewScaffoldedcontig_139951	s_1_1NewScaffoldedcontig_139951	3811	1	6861.3	7608	0	1	3810	3811	1	1	-1	3809	3809	1	3811
s_1_1_contig100748	10949	s_1_1NewScaffoldedcontig_111482	s_1_1NewScaffoldedcontig_111482	2119	1	3813.61	4228	0	6105	8223	1	2119	1	1	2117	2117	0	2119
s_1_1_contig100748	10949	s_1_1NewScaffoldedcontig_167789	s_1_1NewScaffoldedcontig_167789	531	1	823.622	912	0	1	495	531	1	1	-1	495	495	36	531
s_1_1_contig100748	10949	s_1_1NewScaffoldedcontig_42105	s_1_1NewScaffoldedcontig_42105	50154	1	18529.1	20548	0	519	10853	19181	8847	1	-1	10309	10309	2	10336
s_1_1_contig100749	9253	s_1_1NewScaffoldedcontig_31242	s_1_1NewScaffoldedcontig_31242	23087	1	271.792	300	1.68e-69	8021	8356	17342	17677	1	1	268	268	12	342
s_1_1_contig100749	9253	s_1_1NewScaffoldedcontig_75648	s_1_1NewScaffoldedcontig_75648	7043	1	10055.1	11150	0	3674	9253	7043	1464	1	-1	5578	5578	0	5580
s_1_1_contig100749	9253	s_1_1NewScaffoldedcontig_151176	s_1_1NewScaffoldedcontig_151176	3227	1	5802.72	6434	0	453	3673	3227	6	1	-1	3221	3221	1	3222
s_1_1_contig100754	8500	s_1_1NewScaffoldedcontig_175252	s_1_1NewScaffoldedcontig_175252	826	1	1447.59	1604	0	1	818	1	826	1	1	817	817	10	827
s_1_1_contig100754	8500	s_1_1NewScaffoldedcontig_14888	s_1_1NewScaffoldedcontig_14888	39695	1	10430.2	11566	0	798	6590	20557	14765	1	-1	5789	5789	0	5793
s_1_1_contig100754	8500	s_1_1NewScaffoldedcontig_188783	s_1_1NewScaffoldedcontig_188783	719	1	720.83	798	0	6497	6895	1	399	1	1	399	399	0	399
s_1_1_contig100756	9493	s_1_1NewScaffoldedcontig_81239	s_1_1NewScaffoldedcontig_81239	5463	1	93.2581	102	9.57e-16	7764	7856	2922	3015	1	1	80	80	5	96
s_1_1_contig100756	9493	s_1_1NewScaffoldedcontig_35884	s_1_1NewScaffoldedcontig_35884	18818	1	16999.8	18852	0	1	9492	7428	16951	1	1	9484	9484	38	9527
s_1_1_contig100756	9493	s_1_1NewScaffoldedcontig_81752	s_1_1NewScaffoldedcontig_81752	4123	1	7396.9	8202	0	4032	8153	1	4123	1	1	4115	4115	1	4123
s_1_1_contig100758	10950	s_1_1NewScaffoldedcontig_146798	s_1_1NewScaffoldedcontig_146798	601	1	1077.9	1194	0	4717	5318	1	601	1	1	601	601	1	602
s_1_1_contig100758	10950	s_1_1NewScaffoldedcontig_75167	s_1_1NewScaffoldedcontig_75167	5630	1	10148.8	11254	0	5321	10950	1	5630	1	1	5629	5629	0	5630
s_1_1_contig100758	10950	s_1_1NewScaffoldedcontig_114975	s_1_1NewScaffoldedcontig_114975	4555	1	8215.63	9110	0	1	4555	1	4555	1	1	4555	4555	0	4555
s_1_1_contig100763	15975	s_1_1NewScaffoldedcontig_44085	s_1_1NewScaffoldedcontig_44085	22664	1	22974.4	25478	0	2539	15287	13442	692	1	-1	12747	12747	2	12751
s_1_1_contig100763	15975	s_1_1NewScaffoldedcontig_89227	s_1_1NewScaffoldedcontig_89227	2613	1	4686.44	5196	0	5279	7903	1	2613	1	1	2613	2613	12	2625
s_1_1_contig100763	15975	s_1_1NewScaffoldedcontig_100098	s_1_1NewScaffoldedcontig_100098	3077	1	2134.67	2366	0	575	1757	1544	2726	1	1	1183	1183	0	1183
s_1_1_contig100768	8259	s_1_1NewScaffoldedcontig_59489	s_1_1NewScaffoldedcontig_59489	12329	1	14614	16206	0	148	8259	4071	12183	1	1	8110	8110	1	8113
s_1_1_contig100768	8259	s_1_1NewScaffoldedcontig_54890	s_1_1NewScaffoldedcontig_54890	10486	1	111.292	122	3.1e-21	8191	8259	3330	3262	1	-1	66	66	0	69
s_1_1_contig100768	8259	s_1_1NewScaffoldedcontig_39496	s_1_1NewScaffoldedcontig_39496	18296	1	120.309	132	5.99e-24	6471	6744	1219	939	1	-1	204	204	19	287
s_1_1_contig100770	8990	s_1_1NewScaffoldedcontig_37510	s_1_1NewScaffoldedcontig_37510	10754	1	15685.2	17394	0	235	8990	447	9242	1	1	8751	8751	44	8798
s_1_1_contig100770	8990	s_1_1NewScaffoldedcontig_29431	s_1_1NewScaffoldedcontig_29431	11396	1	66.2076	72	1.26e-07	4288	4433	6938	6776	1	-1	116	116	19	164
s_1_1_contig100770	8990	s_1_1NewScaffoldedcontig_37948	s_1_1NewScaffoldedcontig_37948	3057	1	62.6008	68	1.53e-06	2798	2852	2785	2840	1	1	48	48	1	56
s_1_1_contig100771	25644	s_1_1NewScaffoldedcontig_55874	s_1_1NewScaffoldedcontig_55874	53385	1	123.915	136	1.53e-24	18353	18524	49260	49094	1	-1	134	134	9	174
s_1_1_contig100771	25644	s_1_1NewScaffoldedcontig_17796	s_1_1NewScaffoldedcontig_17796	25104	1	44892.5	49786	0	31	25007	24966	13	1	-1	24942	24942	27	24979
s_1_1_contig100771	25644	s_1_1NewScaffoldedcontig_50661	s_1_1NewScaffoldedcontig_50661	13259	1	116.702	128	2.27e-22	18363	18526	6859	6698	1	-1	127	127	6	166
s_1_1_contig100773	9186	s_1_1NewScaffoldedcontig_55315	s_1_1NewScaffoldedcontig_55315	10031	1	11048.7	12252	0	861	6986	1	6126	1	1	6126	6126	0	6126
s_1_1_contig100773	9186	s_1_1NewScaffoldedcontig_176825	s_1_1NewScaffoldedcontig_176825	467	1	843.46	934	0	6966	7432	1	467	1	1	467	467	0	467
s_1_1_contig100773	9186	s_1_1NewScaffoldedcontig_61489	s_1_1NewScaffoldedcontig_61489	2030	1	349.336	386	7.57e-93	4911	5430	1694	1188	1	-1	397	397	45	536
s_1_1_contig100775	9213	s_1_1NewScaffoldedcontig_18284	s_1_1NewScaffoldedcontig_18284	4598	1	163.589	180	6.25e-37	2953	3062	1490	1381	1	-1	102	102	0	110
s_1_1_contig100775	9213	s_1_1NewScaffoldedcontig_24521	s_1_1NewScaffoldedcontig_24521	38931	1	8707.95	9656	0	207	5038	38931	34099	1	-1	4832	4832	1	4833
s_1_1_contig100775	9213	s_1_1NewScaffoldedcontig_65028	s_1_1NewScaffoldedcontig_65028	5157	1	163.589	180	6.25e-37	2953	3062	1307	1198	1	-1	102	102	0	110
s_1_1_contig100777	9128	s_1_1NewScaffoldedcontig_15170	s_1_1NewScaffoldedcontig_15170	20967	1	8852.22	9816	0	338	5245	16060	20967	1	1	4908	4908	0	4908
s_1_1_contig100777	9128	s_1_1NewScaffoldedcontig_48572	s_1_1NewScaffoldedcontig_48572	3912	1	6911.8	7664	0	5294	9128	3850	16	1	-1	3834	3834	0	3835
s_1_1_contig100777	9128	s_1_1NewScaffoldedcontig_60398	s_1_1NewScaffoldedcontig_60398	7611	1	217.691	240	3.21e-53	5144	5325	4567	4379	1	-1	161	161	7	189
s_1_1_contig100781	13748	s_1_1NewScaffoldedcontig_35598	s_1_1NewScaffoldedcontig_35598	24986	1	82.4379	90	2.51e-12	7883	7969	4701	4786	1	1	71	71	1	87
s_1_1_contig100781	13748	s_1_1NewScaffoldedcontig_761	s_1_1NewScaffoldedcontig_761	13361	1	77.0278	84	1.07e-10	7911	7991	608	692	1	1	68	68	4	85
s_1_1_contig100781	13748	s_1_1NewScaffoldedcontig_69357	s_1_1NewScaffoldedcontig_69357	20924	1	21246.8	23562	0	900	12812	1	11901	1	1	11865	11865	66	11940
s_1_1_contig100782	18614	s_1_1NewScaffoldedcontig_77315	s_1_1NewScaffoldedcontig_77315	3583	1	2839.79	3148	0	2015	3598	2000	3583	1	1	1580	1580	0	1584
s_1_1_contig100782	18614	s_1_1NewScaffoldedcontig_59412	s_1_1NewScaffoldedcontig_59412	874	1	183.427	202	1.35e-42	8198	8320	676	552	1	-1	117	117	2	125
s_1_1_contig100782	18614	s_1_1NewScaffoldedcontig_17780	s_1_1NewScaffoldedcontig_17780	40609	1	14787.1	16398	0	10398	18614	32012	23796	1	-1	8210	8210	0	8217
s_1_1_contig100783	9112	s_1_1NewScaffoldedcontig_54715	s_1_1NewScaffoldedcontig_54715	22057	1	329.499	364	7.04e-87	534	852	13582	13250	1	-1	273	273	16	334
s_1_1_contig100783	9112	s_1_1NewScaffoldedcontig_56138	s_1_1NewScaffoldedcontig_56138	2299	1	316.876	350	4.44e-83	534	853	1344	1011	1	-1	271	271	16	335
s_1_1_contig100783	9112	s_1_1NewScaffoldedcontig_3360	s_1_1NewScaffoldedcontig_3360	26269	1	16280.3	18054	0	1	9112	26269	17096	1	-1	9105	9105	64	9175
s_1_1_contig100787	9687	s_1_1NewScaffoldedcontig_3846	s_1_1NewScaffoldedcontig_3846	19507	1	8617.78	9556	0	4874	9687	5417	10253	1	1	4809	4809	23	4837
s_1_1_contig100787	9687	s_1_1NewScaffoldedcontig_97666	s_1_1NewScaffoldedcontig_97666	12934	1	152.769	168	1.19e-33	8828	8942	2671	2785	1	1	105	105	2	116
s_1_1_contig100787	9687	s_1_1NewScaffoldedcontig_5115	s_1_1NewScaffoldedcontig_5115	39848	1	154.573	170	3.41e-34	8828	8942	17017	17130	1	1	104	104	1	115
s_1_1_contig100791	8528	s_1_1NewScaffoldedcontig_5515	s_1_1NewScaffoldedcontig_5515	38522	1	14996.3	16630	0	163	8490	32340	24003	1	-1	8328	8328	10	8338
s_1_1_contig100791	8528	s_1_1NewScaffoldedcontig_79134	s_1_1NewScaffoldedcontig_79134	4772	1	49.9773	54	0.00918284	8338	8374	954	990	1	1	33	33	0	37
s_1_1_contig100791	8528	s_1_1NewScaffoldedcontig_83106	s_1_1NewScaffoldedcontig_83106	4269	1	55.3874	60	0.00021596	6851	6888	900	937	1	1	35	35	0	38
s_1_1_contig100792	10387	s_1_1NewScaffoldedcontig_79743	s_1_1NewScaffoldedcontig_79743	11653	1	111.292	122	3.9e-21	10308	10385	7481	7406	1	-1	72	72	2	78
s_1_1_contig100792	10387	s_1_1NewScaffoldedcontig_3576	s_1_1NewScaffoldedcontig_3576	53476	1	109.488	120	1.36e-20	10310	10387	33642	33565	1	-1	71	71	0	78
s_1_1_contig100792	10387	s_1_1NewScaffoldedcontig_3752	s_1_1NewScaffoldedcontig_3752	55982	1	18723.9	20764	0	1	10387	4079	14465	1	1	10385	10385	0	10387
s_1_1_contig100797	8040	s_1_1NewScaffoldedcontig_116618	s_1_1NewScaffoldedcontig_116618	2056	1	51.7806	56	0.00247976	6014	6061	339	386	1	1	40	40	0	48
s_1_1_contig100797	8040	s_1_1NewScaffoldedcontig_15969	s_1_1NewScaffoldedcontig_15969	48875	1	7665.6	8500	0	3786	8040	44621	48875	1	1	4253	4253	0	4255
s_1_1_contig100797	8040	s_1_1NewScaffoldedcontig_65894	s_1_1NewScaffoldedcontig_65894	5707	1	113.095	124	8.65e-22	7974	8040	5683	5617	1	-1	65	65	0	67
s_1_1_contig100798	11893	s_1_1NewScaffoldedcontig_74075	s_1_1NewScaffoldedcontig_74075	2036	1	3663.93	4062	0	9858	11893	1	2036	1	1	2034	2034	0	2036
s_1_1_contig100798	11893	s_1_1NewScaffoldedcontig_40351	s_1_1NewScaffoldedcontig_40351	4875	1	163.589	180	8.08e-37	6998	7121	2992	3113	1	1	112	112	2	124
s_1_1_contig100798	11893	s_1_1NewScaffoldedcontig_73996	s_1_1NewScaffoldedcontig_73996	9619	1	16410.1	18198	0	38	9139	9619	518	1	-1	9101	9101	0	9102
s_1_1_contig100799	15554	s_1_1NewScaffoldedcontig_160554	s_1_1NewScaffoldedcontig_160554	501	1	69.8143	76	1.79e-08	1	41	56	16	1	-1	40	40	0	41
s_1_1_contig100799	15554	s_1_1NewScaffoldedcontig_11404	s_1_1NewScaffoldedcontig_11404	37428	1	28036.5	31092	0	1	15554	21744	37297	1	1	15551	15551	0	15554
s_1_1_contig100799	15554	s_1_1NewScaffoldedcontig_46943	s_1_1NewScaffoldedcontig_46943	26815	1	71.6177	78	5.13e-09	1	42	25527	25486	1	-1	41	41	0	42
s_1_1_contig100801	12056	s_1_1NewScaffoldedcontig_96430	s_1_1NewScaffoldedcontig_96430	3761	1	48.1739	52	0.0453654	1447	1492	427	382	1	-1	38	38	0	46
s_1_1_contig100801	12056	s_1_1NewScaffoldedcontig_158272	s_1_1NewScaffoldedcontig_158272	4566	1	49.9773	54	0.0129974	5782	5817	1443	1476	1	1	33	33	2	36
s_1_1_contig100801	12056	s_1_1NewScaffoldedcontig_9011	s_1_1NewScaffoldedcontig_9011	64931	1	21661.5	24022	0	22	12045	10031	22053	1	1	12022	12022	3	12025
s_1_1_contig100803	10647	s_1_1NewScaffoldedcontig_12398	s_1_1NewScaffoldedcontig_12398	46899	1	560.331	620	2.68e-156	5853	6725	34181	33263	1	-1	683	683	82	937
s_1_1_contig100803	10647	s_1_1NewScaffoldedcontig_1439	s_1_1NewScaffoldedcontig_1439	17396	1	646.892	716	0	5876	6715	16510	17396	1	1	679	679	67	897
s_1_1_contig100803	10647	s_1_1NewScaffoldedcontig_25006	s_1_1NewScaffoldedcontig_25006	11630	1	19117	21200	0	6	10647	10665	1	1	-1	10637	10637	31	10669
s_1_1_contig100804	10358	s_1_1NewScaffoldedcontig_24865	s_1_1NewScaffoldedcontig_24865	16923	1	18545.3	20566	0	1	10296	312	10607	1	1	10291	10291	0	10296
s_1_1_contig100804	10358	s_1_1NewScaffoldedcontig_27630	s_1_1NewScaffoldedcontig_27630	14000	1	48.1739	52	0.0389574	5683	5734	5489	5541	1	1	43	43	1	53
s_1_1_contig100804	10358	s_1_1NewScaffoldedcontig_161177	s_1_1NewScaffoldedcontig_161177	2533	1	48.1739	52	0.0389574	3800	3855	817	874	1	1	47	47	4	59
s_1_1_contig100805	12343	s_1_1NewScaffoldedcontig_38227	s_1_1NewScaffoldedcontig_38227	8790	1	15784.4	17504	0	3070	11828	8757	1	1	-1	8757	8757	2	8759
s_1_1_contig100805	12343	s_1_1NewScaffoldedcontig_35314	s_1_1NewScaffoldedcontig_35314	64593	1	3905.58	4330	0	7	2176	4980	7148	1	1	2169	2169	1	2170
s_1_1_contig100805	12343	s_1_1NewScaffoldedcontig_92177	s_1_1NewScaffoldedcontig_92177	2339	1	4219.37	4678	0	4421	6759	2339	1	1	-1	2339	2339	0	2339
s_1_1_contig100811	9557	s_1_1NewScaffoldedcontig_178804	s_1_1NewScaffoldedcontig_178804	584	1	1011.17	1120	0	7275	7834	584	25	1	-1	560	560	0	560
s_1_1_contig100811	9557	s_1_1NewScaffoldedcontig_5781	s_1_1NewScaffoldedcontig_5781	32925	1	3952.47	4382	0	583	2776	24425	22232	1	-1	2193	2193	0	2194
s_1_1_contig100811	9557	s_1_1NewScaffoldedcontig_80707	s_1_1NewScaffoldedcontig_80707	762	1	1335.78	1480	0	2759	3498	23	762	1	1	740	740	0	740
s_1_1_contig100815	11310	s_1_1NewScaffoldedcontig_161779	s_1_1NewScaffoldedcontig_161779	1302	1	2273.53	2520	0	10009	11310	1	1302	1	1	1281	1281	0	1302
s_1_1_contig100815	11310	s_1_1NewScaffoldedcontig_184348	s_1_1NewScaffoldedcontig_184348	546	1	985.926	1092	0	3102	3647	1	546	1	1	546	546	0	546
s_1_1_contig100815	11310	s_1_1NewScaffoldedcontig_40014	s_1_1NewScaffoldedcontig_40014	36141	1	4679.22	5188	0	3980	6573	19727	17134	1	-1	2594	2594	0	2594
s_1_1_contig100823	9094	s_1_1NewScaffoldedcontig_1927	s_1_1NewScaffoldedcontig_1927	39844	1	9037.97	10022	0	4070	9092	25610	30630	1	1	5020	5020	2	5023
s_1_1_contig100823	9094	s_1_1NewScaffoldedcontig_86765	s_1_1NewScaffoldedcontig_86765	1308	1	302.449	334	9.76e-79	3904	4138	265	499	1	1	208	208	0	235
s_1_1_contig100823	9094	s_1_1NewScaffoldedcontig_117211	s_1_1NewScaffoldedcontig_117211	11875	1	304.252	336	2.8e-79	3904	4134	6041	5811	1	-1	206	206	0	231
s_1_1_contig100824	8002	s_1_1NewScaffoldedcontig_24097	s_1_1NewScaffoldedcontig_24097	7975	1	8047.92	8924	0	3525	8002	7975	3501	1	-1	4474	4474	3	4478
s_1_1_contig100824	8002	s_1_1NewScaffoldedcontig_136734	s_1_1NewScaffoldedcontig_136734	9577	1	6935.24	7690	0	1	3850	3850	1	1	-1	3848	3848	0	3850
s_1_1_contig100824	8002	s_1_1NewScaffoldedcontig_164514	s_1_1NewScaffoldedcontig_164514	836	1	49.9773	54	0.00861411	1742	1783	42	1	1	-1	36	36	0	42
s_1_1_contig100827	9133	s_1_1NewScaffoldedcontig_34368	s_1_1NewScaffoldedcontig_34368	25688	1	149.163	164	1.36e-32	11	183	15158	14969	1	-1	150	150	21	192
s_1_1_contig100827	9133	s_1_1NewScaffoldedcontig_33197	s_1_1NewScaffoldedcontig_33197	19025	1	15494	17182	0	1	8620	18862	10227	1	-1	8617	8617	16	8636
s_1_1_contig100827	9133	s_1_1NewScaffoldedcontig_137842	s_1_1NewScaffoldedcontig_137842	1396	1	150.966	166	3.91e-33	11	175	115	282	1	1	139	139	7	170
s_1_1_contig100836	17680	s_1_1NewScaffoldedcontig_144478	s_1_1NewScaffoldedcontig_144478	1104	1	1986.8	2202	0	3877	4980	1104	1	1	-1	1103	1103	0	1104
s_1_1_contig100836	17680	s_1_1NewScaffoldedcontig_49518	s_1_1NewScaffoldedcontig_49518	39558	1	12882.7	14286	0	9880	17025	32413	39558	1	1	7145	7145	0	7146
s_1_1_contig100836	17680	s_1_1NewScaffoldedcontig_155626	s_1_1NewScaffoldedcontig_155626	2053	1	1036.42	1148	0	1549	2199	644	1	1	-1	614	614	7	651
s_1_1_contig100838	8581	s_1_1NewScaffoldedcontig_56272	s_1_1NewScaffoldedcontig_56272	7876	1	89.6514	98	1.05e-14	555	678	1936	2059	1	1	94	94	0	124
s_1_1_contig100838	8581	s_1_1NewScaffoldedcontig_1565	s_1_1NewScaffoldedcontig_1565	11194	1	15082.9	16726	0	1	8377	2820	11194	1	1	8372	8372	2	8377
s_1_1_contig100838	8581	s_1_1NewScaffoldedcontig_173606	s_1_1NewScaffoldedcontig_173606	1972	1	3498.02	3878	0	2762	4751	1	1972	1	1	1968	1968	18	1990
s_1_1_contig100840	8352	s_1_1NewScaffoldedcontig_98065	s_1_1NewScaffoldedcontig_98065	2521	1	387.207	428	2.74e-104	161	374	214	1	1	-1	214	214	0	214
s_1_1_contig100840	8352	s_1_1NewScaffoldedcontig_46978	s_1_1NewScaffoldedcontig_46978	9642	1	8776.48	9732	0	500	5396	4746	9642	1	1	4882	4882	0	4897
s_1_1_contig100840	8352	s_1_1NewScaffoldedcontig_125532	s_1_1NewScaffoldedcontig_125532	2141	1	3862.3	4282	0	6212	8352	2141	1	1	-1	2141	2141	0	2141
s_1_1_contig100849	10217	s_1_1NewScaffoldedcontig_49802	s_1_1NewScaffoldedcontig_49802	55808	1	114.899	126	3.15e-22	6698	6778	7272	7193	1	-1	77	77	5	83
s_1_1_contig100849	10217	s_1_1NewScaffoldedcontig_19288	s_1_1NewScaffoldedcontig_19288	15058	1	113.095	124	1.1e-21	6710	6778	12755	12825	1	1	68	68	2	71
s_1_1_contig100849	10217	s_1_1NewScaffoldedcontig_4349	s_1_1NewScaffoldedcontig_4349	50581	1	18339.7	20338	0	1	10217	35513	45730	1	1	10195	10195	1	10218
s_1_1_contig100850	9138	s_1_1NewScaffoldedcontig_4836	s_1_1NewScaffoldedcontig_4836	2224	1	4002.96	4438	0	397	2619	1	2224	1	1	2223	2223	1	2224
s_1_1_contig100850	9138	s_1_1NewScaffoldedcontig_87870	s_1_1NewScaffoldedcontig_87870	2757	1	4929.89	5466	0	5215	7947	2733	1	1	-1	2733	2733	0	2733
s_1_1_contig100850	9138	s_1_1NewScaffoldedcontig_152533	s_1_1NewScaffoldedcontig_152533	5105	1	1220.36	1352	0	4517	5192	5105	4430	1	-1	676	676	0	676
s_1_1_contig100857	17014	s_1_1NewScaffoldedcontig_127998	s_1_1NewScaffoldedcontig_127998	5949	1	379.994	420	8.3e-102	12544	12863	5186	5511	1	1	282	282	10	328
s_1_1_contig100857	17014	s_1_1NewScaffoldedcontig_12113	s_1_1NewScaffoldedcontig_12113	29633	1	14058.5	15590	0	1	7798	12386	20183	1	1	7797	7797	0	7798
s_1_1_contig100857	17014	s_1_1NewScaffoldedcontig_22307	s_1_1NewScaffoldedcontig_22307	11451	1	2545.84	2822	0	12555	13965	1	1411	1	1	1411	1411	0	1411
s_1_1_contig100867	11668	s_1_1NewScaffoldedcontig_176629	s_1_1NewScaffoldedcontig_176629	879	1	1586.45	1758	0	2476	3354	1	879	1	1	879	879	0	879
s_1_1_contig100867	11668	s_1_1NewScaffoldedcontig_115655	s_1_1NewScaffoldedcontig_115655	1562	1	2798.31	3102	0	707	2265	1	1562	1	1	1559	1559	3	1562
s_1_1_contig100867	11668	s_1_1NewScaffoldedcontig_51895	s_1_1NewScaffoldedcontig_51895	51695	1	15019.7	16656	0	3332	11668	10323	18660	1	1	8335	8335	1	8338
s_1_1_contig100868	16075	s_1_1NewScaffoldedcontig_97352	s_1_1NewScaffoldedcontig_97352	5089	1	8935.18	9908	0	7650	12611	128	5089	1	1	4959	4959	0	4962
s_1_1_contig100868	16075	s_1_1NewScaffoldedcontig_72766	s_1_1NewScaffoldedcontig_72766	7234	1	4581.84	5080	0	13531	16075	257	2801	1	1	2543	2543	0	2545
s_1_1_contig100868	16075	s_1_1NewScaffoldedcontig_106770	s_1_1NewScaffoldedcontig_106770	4836	1	6664.73	7390	0	1896	5664	1074	4812	1	1	3736	3736	34	3771
s_1_1_contig100870	15435	s_1_1NewScaffoldedcontig_19136	s_1_1NewScaffoldedcontig_19136	34495	1	883.134	978	0	5989	7082	18045	16941	1	-1	878	878	45	1122
s_1_1_contig100870	15435	s_1_1NewScaffoldedcontig_17089	s_1_1NewScaffoldedcontig_17089	35145	1	2367.31	2624	0	13961	15435	34827	33354	1	-1	1416	1416	27	1488
s_1_1_contig100870	15435	s_1_1NewScaffoldedcontig_58545	s_1_1NewScaffoldedcontig_58545	12971	1	23306.2	25846	0	1122	14091	12971	1	1	-1	12950	12950	1	12971
s_1_1_contig100871	9496	s_1_1NewScaffoldedcontig_132584	s_1_1NewScaffoldedcontig_132584	609	1	544.1	602	1.84e-151	700	1000	309	609	1	1	301	301	0	301
s_1_1_contig100871	9496	s_1_1NewScaffoldedcontig_10763	s_1_1NewScaffoldedcontig_10763	20934	1	15239.8	16900	0	1024	9473	8976	17425	1	1	8450	8450	0	8450
s_1_1_contig100871	9496	s_1_1NewScaffoldedcontig_13724	s_1_1NewScaffoldedcontig_13724	24127	1	143.752	158	6.04e-31	4358	4449	19841	19750	1	-1	87	87	0	92
s_1_1_contig100872	11658	s_1_1NewScaffoldedcontig_26687	s_1_1NewScaffoldedcontig_26687	23080	1	1018.39	1128	0	11048	11611	1	564	1	1	564	564	0	564
s_1_1_contig100872	11658	s_1_1NewScaffoldedcontig_11415	s_1_1NewScaffoldedcontig_11415	21385	1	8441.05	9360	0	1	4683	4683	1	1	-1	4682	4682	0	4683
s_1_1_contig100872	11658	s_1_1NewScaffoldedcontig_26688	s_1_1NewScaffoldedcontig_26688	6115	1	11028.9	12230	0	4669	10783	6115	1	1	-1	6115	6115	0	6115
s_1_1_contig100874	8317	s_1_1NewScaffoldedcontig_119214	s_1_1NewScaffoldedcontig_119214	4322	1	354.747	392	1.61e-94	4004	4631	3401	4048	1	1	482	482	56	666
s_1_1_contig100874	8317	s_1_1NewScaffoldedcontig_97839	s_1_1NewScaffoldedcontig_97839	34495	1	7351.82	8152	0	23	4101	14360	18438	1	1	4078	4078	0	4079
s_1_1_contig100874	8317	s_1_1NewScaffoldedcontig_173009	s_1_1NewScaffoldedcontig_173009	919	1	890.347	986	0	7699	8222	919	368	1	-1	524	524	28	552
s_1_1_contig100881	13181	s_1_1NewScaffoldedcontig_52590	s_1_1NewScaffoldedcontig_52590	1861	1	3357.36	3722	0	6180	8040	1	1861	1	1	1861	1861	0	1861
s_1_1_contig100881	13181	s_1_1NewScaffoldedcontig_2523	s_1_1NewScaffoldedcontig_2523	41076	1	288.022	318	3.12e-74	9018	9262	4050	4293	1	1	214	214	5	247
s_1_1_contig100881	13181	s_1_1NewScaffoldedcontig_6877	s_1_1NewScaffoldedcontig_6877	25848	1	22256.7	24682	0	62	12416	12356	1	1	-1	12351	12351	1	12356
s_1_1_contig100887	20474	s_1_1NewScaffoldedcontig_36572	s_1_1NewScaffoldedcontig_36572	32450	1	17805.9	19746	0	8627	18535	22547	32450	1	1	9899	9899	9	9911
s_1_1_contig100887	20474	s_1_1NewScaffoldedcontig_107114	s_1_1NewScaffoldedcontig_107114	11879	1	3409.65	3780	0	18567	20474	11879	9957	1	-1	1908	1908	15	1923
s_1_1_contig100887	20474	s_1_1NewScaffoldedcontig_170414	s_1_1NewScaffoldedcontig_170414	1986	1	3566.55	3954	0	13006	14992	1	1986	1	1	1984	1984	1	1987
s_1_1_contig100891	10916	s_1_1NewScaffoldedcontig_19709	s_1_1NewScaffoldedcontig_19709	18791	1	18251.4	20240	0	769	10912	14337	4193	1	-1	10138	10138	3	10146
s_1_1_contig100891	10916	s_1_1NewScaffoldedcontig_23822	s_1_1NewScaffoldedcontig_23822	10992	1	551.314	610	1.42e-153	6891	7659	141	903	1	1	601	601	44	788
s_1_1_contig100891	10916	s_1_1NewScaffoldedcontig_69810	s_1_1NewScaffoldedcontig_69810	9404	1	493.606	546	3.35e-136	6891	7687	1879	1049	1	-1	620	620	44	836
s_1_1_contig100895	11161	s_1_1NewScaffoldedcontig_111637	s_1_1NewScaffoldedcontig_111637	7160	1	190.64	210	5.45e-45	8506	8653	1647	1794	1	1	131	131	0	148
s_1_1_contig100895	11161	s_1_1NewScaffoldedcontig_87442	s_1_1NewScaffoldedcontig_87442	28348	1	11782.7	13066	0	29	6576	20794	14248	1	-1	6545	6545	3	6549
s_1_1_contig100895	11161	s_1_1NewScaffoldedcontig_177764	s_1_1NewScaffoldedcontig_177764	716	1	462.949	512	5.8e-127	7188	7443	286	541	1	1	256	256	0	256
s_1_1_contig100896	13651	s_1_1NewScaffoldedcontig_36482	s_1_1NewScaffoldedcontig_36482	9442	1	8287.77	9190	0	5303	9897	25	4619	1	1	4595	4595	0	4595
s_1_1_contig100896	13651	s_1_1NewScaffoldedcontig_50855	s_1_1NewScaffoldedcontig_50855	14458	1	8487.94	9412	0	539	5247	9750	14458	1	1	4708	4708	0	4709
s_1_1_contig100896	13651	s_1_1NewScaffoldedcontig_70127	s_1_1NewScaffoldedcontig_70127	9723	1	5543.04	6146	0	10571	13651	1	3081	1	1	3078	3078	0	3081
s_1_1_contig100897	31889	s_1_1NewScaffoldedcontig_20635	s_1_1NewScaffoldedcontig_20635	66309	1	32424.1	35958	0	662	18692	28082	10043	1	-1	18019	18019	11	18041
s_1_1_contig100897	31889	s_1_1NewScaffoldedcontig_165827	s_1_1NewScaffoldedcontig_165827	610	1	1101.34	1220	0	67	676	1	610	1	1	610	610	0	610
s_1_1_contig100897	31889	s_1_1NewScaffoldedcontig_42146	s_1_1NewScaffoldedcontig_42146	2810	1	4026.41	4464	0	29148	31455	1	2370	1	1	2305	2305	62	2370
s_1_1_contig100904	9797	s_1_1NewScaffoldedcontig_23686	s_1_1NewScaffoldedcontig_23686	5481	1	5395.16	5982	0	5761	8798	1	3037	1	1	3016	3016	1	3038
s_1_1_contig100904	9797	s_1_1NewScaffoldedcontig_162510	s_1_1NewScaffoldedcontig_162510	1547	1	479.179	530	6.62e-132	5504	5795	1547	1259	1	-1	285	285	5	293
s_1_1_contig100904	9797	s_1_1NewScaffoldedcontig_26044	s_1_1NewScaffoldedcontig_26044	19509	1	6450.13	7152	0	2202	5795	7373	10966	1	1	3589	3589	2	3595
s_1_1_contig100909	11848	s_1_1NewScaffoldedcontig_20960	s_1_1NewScaffoldedcontig_20960	27174	1	217.691	240	4.16e-53	2913	3071	20	179	1	1	145	145	1	160
s_1_1_contig100909	11848	s_1_1NewScaffoldedcontig_102525	s_1_1NewScaffoldedcontig_102525	11057	1	11465.3	12714	0	4571	10934	4692	11057	1	1	6363	6363	2	6366
s_1_1_contig100909	11848	s_1_1NewScaffoldedcontig_81229	s_1_1NewScaffoldedcontig_81229	4126	1	224.904	248	2.81e-55	2913	3070	162	4	1	-1	146	146	1	159
s_1_1_contig100911	12235	s_1_1NewScaffoldedcontig_34270	s_1_1NewScaffoldedcontig_34270	42237	1	466.555	516	5.22e-128	3117	3402	3712	3997	1	1	275	275	0	286
s_1_1_contig100911	12235	s_1_1NewScaffoldedcontig_13254	s_1_1NewScaffoldedcontig_13254	82674	1	324.089	358	4.02e-85	2972	3257	35389	35080	1	-1	256	256	26	311
s_1_1_contig100911	12235	s_1_1NewScaffoldedcontig_33235	s_1_1NewScaffoldedcontig_33235	45786	1	7452.81	8264	0	5958	10192	6631	2435	1	-1	4187	4187	38	4235
s_1_1_contig100913	9562	s_1_1NewScaffoldedcontig_9346	s_1_1NewScaffoldedcontig_9346	51336	1	66.2076	72	1.34e-07	8623	8779	5709	5862	1	1	110	110	3	157
s_1_1_contig100913	9562	s_1_1NewScaffoldedcontig_46385	s_1_1NewScaffoldedcontig_46385	65355	1	15609.4	17310	0	1	8655	27501	36155	1	1	8655	8655	0	8655
s_1_1_contig100913	9562	s_1_1NewScaffoldedcontig_32554	s_1_1NewScaffoldedcontig_32554	2626	1	62.6008	68	1.63e-06	8573	8779	2022	2221	1	1	141	141	11	209
s_1_1_contig100914	21013	s_1_1NewScaffoldedcontig_79734	s_1_1NewScaffoldedcontig_79734	2736	1	235.724	260	2.76e-58	4767	4983	309	94	1	-1	183	183	1	217
s_1_1_contig100914	21013	s_1_1NewScaffoldedcontig_32902	s_1_1NewScaffoldedcontig_32902	21920	1	24159.2	26792	0	1	13414	825	14253	1	1	13414	13414	15	13429
s_1_1_contig100914	21013	s_1_1NewScaffoldedcontig_40196	s_1_1NewScaffoldedcontig_40196	21469	1	239.331	264	2.26e-59	4767	4983	13048	12833	1	-1	184	184	1	217
s_1_1_contig100916	12780	s_1_1NewScaffoldedcontig_112095	s_1_1NewScaffoldedcontig_112095	3112	1	764.111	846	0	12291	12718	1082	655	1	-1	426	426	0	428
s_1_1_contig100916	12780	s_1_1NewScaffoldedcontig_120704	s_1_1NewScaffoldedcontig_120704	12886	1	19939.3	22112	0	234	11299	11084	19	1	-1	11062	11062	0	11066
s_1_1_contig100916	12780	s_1_1NewScaffoldedcontig_158987	s_1_1NewScaffoldedcontig_158987	2664	1	4800.05	5322	0	2280	4943	2664	1	1	-1	2663	2663	0	2664
s_1_1_contig100920	11509	s_1_1NewScaffoldedcontig_66786	s_1_1NewScaffoldedcontig_66786	705	1	57.1907	62	8.36e-05	1	55	24	79	1	1	47	47	1	56
s_1_1_contig100920	11509	s_1_1NewScaffoldedcontig_27608	s_1_1NewScaffoldedcontig_27608	22056	1	20732.8	22992	0	1	11509	11533	25	1	-1	11504	11504	0	11509
s_1_1_contig100920	11509	s_1_1NewScaffoldedcontig_8998	s_1_1NewScaffoldedcontig_8998	26052	1	57.1907	62	8.36e-05	8	53	7545	7590	1	1	40	40	0	46
s_1_1_contig100923	8504	s_1_1NewScaffoldedcontig_133915	s_1_1NewScaffoldedcontig_133915	2935	1	49.9773	54	0.00915689	99	150	127	178	1	1	42	42	0	52
s_1_1_contig100923	8504	s_1_1NewScaffoldedcontig_191310	s_1_1NewScaffoldedcontig_191310	514	1	928.218	1028	0	7867	8380	514	1	1	-1	514	514	0	514
s_1_1_contig100923	8504	s_1_1NewScaffoldedcontig_48117	s_1_1NewScaffoldedcontig_48117	15259	1	13975.6	15498	0	96	7844	99	7847	1	1	7749	7749	0	7749
s_1_1_contig100925	9185	s_1_1NewScaffoldedcontig_69780	s_1_1NewScaffoldedcontig_69780	24045	1	349.336	386	7.57e-93	6637	7205	12807	12265	1	-1	431	431	52	582
s_1_1_contig100925	9185	s_1_1NewScaffoldedcontig_43687	s_1_1NewScaffoldedcontig_43687	45364	1	11180.4	12398	0	1193	7391	38826	45024	1	1	6199	6199	0	6199
s_1_1_contig100925	9185	s_1_1NewScaffoldedcontig_70434	s_1_1NewScaffoldedcontig_70434	10366	1	1981.39	2196	0	8088	9185	1	1098	1	1	1098	1098	0	1098
s_1_1_contig100926	9539	s_1_1NewScaffoldedcontig_7607	s_1_1NewScaffoldedcontig_7607	11013	1	17113.5	18978	0	1	9539	11013	1443	1	-1	9536	9536	34	9572
s_1_1_contig100926	9539	s_1_1NewScaffoldedcontig_85578	s_1_1NewScaffoldedcontig_85578	19599	1	297.039	328	4.35e-77	1873	2263	1514	1081	1	-1	327	327	47	436
s_1_1_contig100926	9539	s_1_1NewScaffoldedcontig_4446	s_1_1NewScaffoldedcontig_4446	26992	1	297.039	328	4.35e-77	1887	2271	9996	10400	1	1	313	313	22	406
s_1_1_contig100929	10130	s_1_1NewScaffoldedcontig_59701	s_1_1NewScaffoldedcontig_59701	5030	1	9019.93	10002	0	230	5235	5008	1	1	-1	5006	5006	2	5008
s_1_1_contig100929	10130	s_1_1NewScaffoldedcontig_101626	s_1_1NewScaffoldedcontig_101626	4085	1	7368.05	8170	0	5234	9318	4085	1	1	-1	4085	4085	0	4085
s_1_1_contig100929	10130	s_1_1NewScaffoldedcontig_15271	s_1_1NewScaffoldedcontig_15271	65610	1	764.111	846	0	9480	9902	1	423	1	1	423	423	0	423
s_1_1_contig100931	9284	s_1_1NewScaffoldedcontig_141488	s_1_1NewScaffoldedcontig_141488	6558	1	361.96	400	1.21e-96	8505	9221	253	1020	1	1	553	553	63	774
s_1_1_contig100931	9284	s_1_1NewScaffoldedcontig_97029	s_1_1NewScaffoldedcontig_97029	10083	1	358.353	396	1.48e-95	8754	9284	5124	5656	1	1	412	412	26	545
s_1_1_contig100931	9284	s_1_1NewScaffoldedcontig_8539	s_1_1NewScaffoldedcontig_8539	73730	1	11322.8	12556	0	94	6371	27019	33296	1	1	6278	6278	0	6278
s_1_1_contig100940	12437	s_1_1NewScaffoldedcontig_62100	s_1_1NewScaffoldedcontig_62100	19373	1	55.3874	60	0.000315358	2033	2070	18795	18832	1	1	35	35	0	38
s_1_1_contig100940	12437	s_1_1NewScaffoldedcontig_43572	s_1_1NewScaffoldedcontig_43572	30068	1	9784.56	10850	0	1	5442	12509	7054	1	-1	5442	5442	14	5456
s_1_1_contig100940	12437	s_1_1NewScaffoldedcontig_53538	s_1_1NewScaffoldedcontig_53538	14979	1	51.7806	56	0.00384184	12120	12163	6601	6645	1	1	39	39	1	45
s_1_1_contig100943	8840	s_1_1NewScaffoldedcontig_33814	s_1_1NewScaffoldedcontig_33814	51491	1	753.291	834	0	5181	6122	31260	30272	1	-1	758	758	51	991
s_1_1_contig100943	8840	s_1_1NewScaffoldedcontig_12552	s_1_1NewScaffoldedcontig_12552	2160	1	684.763	758	0	5185	6111	1324	345	1	-1	743	743	63	985
s_1_1_contig100943	8840	s_1_1NewScaffoldedcontig_24537	s_1_1NewScaffoldedcontig_24537	25366	1	15400.3	17078	0	244	8840	16733	25366	1	1	8593	8593	41	8636
s_1_1_contig100948	11000	s_1_1NewScaffoldedcontig_17707	s_1_1NewScaffoldedcontig_17707	11960	1	19825.7	21986	0	1	10993	10993	1	1	-1	10993	10993	0	10993
s_1_1_contig100948	11000	s_1_1NewScaffoldedcontig_101012	s_1_1NewScaffoldedcontig_101012	1848	1	3270.79	3626	0	1	1813	36	1848	1	1	1813	1813	0	1813
s_1_1_contig100948	11000	s_1_1NewScaffoldedcontig_88411	s_1_1NewScaffoldedcontig_88411	2102	1	3716.23	4120	0	5699	7809	11	2102	1	1	2090	2090	19	2111
s_1_1_contig100949	9442	s_1_1NewScaffoldedcontig_67527	s_1_1NewScaffoldedcontig_67527	20907	1	9367.98	10388	0	4142	9340	13858	19055	1	1	5198	5198	1	5199
s_1_1_contig100949	9442	s_1_1NewScaffoldedcontig_41399	s_1_1NewScaffoldedcontig_41399	38049	1	289.825	320	6.4e-75	3338	3598	24151	23890	1	-1	222	222	1	262
s_1_1_contig100949	9442	s_1_1NewScaffoldedcontig_114109	s_1_1NewScaffoldedcontig_114109	3345	1	284.415	314	2.72e-73	3338	3598	2935	2671	1	-1	224	224	4	265
s_1_1_contig100954	14279	s_1_1NewScaffoldedcontig_26908	s_1_1NewScaffoldedcontig_26908	46828	1	22007.8	24406	0	237	12512	13651	25913	1	1	12257	12257	21	12280
s_1_1_contig100954	14279	s_1_1NewScaffoldedcontig_179805	s_1_1NewScaffoldedcontig_179805	508	1	917.398	1016	0	12498	13005	508	1	1	-1	508	508	0	508
s_1_1_contig100954	14279	s_1_1NewScaffoldedcontig_58999	s_1_1NewScaffoldedcontig_58999	1869	1	2057.13	2280	0	12989	14265	1869	596	1	-1	1227	1227	7	1279
s_1_1_contig100957	10401	s_1_1NewScaffoldedcontig_136061	s_1_1NewScaffoldedcontig_136061	1934	1	3483.59	3862	0	8314	10247	1934	1	1	-1	1933	1933	0	1934
s_1_1_contig100957	10401	s_1_1NewScaffoldedcontig_4977	s_1_1NewScaffoldedcontig_4977	36664	1	12422.9	13776	0	3466	10401	22047	15127	1	-1	6915	6915	15	6936
s_1_1_contig100957	10401	s_1_1NewScaffoldedcontig_156084	s_1_1NewScaffoldedcontig_156084	3574	1	6096.67	6760	0	1	3429	1	3467	1	1	3427	3427	40	3468
s_1_1_contig100959	10373	s_1_1NewScaffoldedcontig_45595	s_1_1NewScaffoldedcontig_45595	13158	1	4170.67	4624	0	16	2327	2325	14	1	-1	2312	2312	0	2312
s_1_1_contig100959	10373	s_1_1NewScaffoldedcontig_58820	s_1_1NewScaffoldedcontig_58820	43936	1	14536.4	16120	0	2308	10370	43936	35874	1	-1	8062	8062	0	8063
s_1_1_contig100959	10373	s_1_1NewScaffoldedcontig_83287	s_1_1NewScaffoldedcontig_83287	14125	1	147.359	162	5.41e-32	4466	4994	5358	4817	1	-1	373	373	41	556
s_1_1_contig100961	10480	s_1_1NewScaffoldedcontig_126983	s_1_1NewScaffoldedcontig_126983	1873	1	179.82	198	9.25e-42	1	114	139	252	1	1	108	108	0	114
s_1_1_contig100961	10480	s_1_1NewScaffoldedcontig_79757	s_1_1NewScaffoldedcontig_79757	4317	1	4527.74	5020	0	18	2577	1726	4317	1	1	2554	2554	32	2592
s_1_1_contig100961	10480	s_1_1NewScaffoldedcontig_11355	s_1_1NewScaffoldedcontig_11355	12002	1	8626.8	9566	0	4642	9454	1676	6513	1	1	4812	4812	25	4838
s_1_1_contig100963	9368	s_1_1NewScaffoldedcontig_112653	s_1_1NewScaffoldedcontig_112653	1170	1	2060.73	2284	0	1	1151	1170	19	1	-1	1149	1149	1	1152
s_1_1_contig100963	9368	s_1_1NewScaffoldedcontig_53645	s_1_1NewScaffoldedcontig_53645	26238	1	13360.6	14816	0	1755	9208	222	7675	1	1	7439	7439	6	7457
s_1_1_contig100963	9368	s_1_1NewScaffoldedcontig_125400	s_1_1NewScaffoldedcontig_125400	4118	1	48.1739	52	0.0352213	9193	9238	278	233	1	-1	38	38	0	46
s_1_1_contig100967	9800	s_1_1NewScaffoldedcontig_19309	s_1_1NewScaffoldedcontig_19309	13512	1	10388.7	11520	0	3765	9535	10541	4775	1	-1	5767	5767	4	5771
s_1_1_contig100967	9800	s_1_1NewScaffoldedcontig_128928	s_1_1NewScaffoldedcontig_128928	2111	1	250.151	276	5.82e-63	1	138	138	1	1	-1	138	138	0	138
s_1_1_contig100967	9800	s_1_1NewScaffoldedcontig_80951	s_1_1NewScaffoldedcontig_80951	21880	1	86.0446	94	1.47e-13	5978	6090	16082	15969	1	-1	88	88	1	114
s_1_1_contig100972	8229	s_1_1NewScaffoldedcontig_32844	s_1_1NewScaffoldedcontig_32844	49790	1	11202	12422	0	1668	7881	11569	5356	1	-1	6213	6213	0	6214
s_1_1_contig100972	8229	s_1_1NewScaffoldedcontig_30263	s_1_1NewScaffoldedcontig_30263	66622	1	46.3705	50	0.107931	5932	5987	33435	33380	1	-1	46	46	2	57
s_1_1_contig100972	8229	s_1_1NewScaffoldedcontig_45307	s_1_1NewScaffoldedcontig_45307	6605	1	46.3705	50	0.107931	2640	2669	5721	5750	1	1	28	28	0	30
s_1_1_contig100981	9371	s_1_1NewScaffoldedcontig_94689	s_1_1NewScaffoldedcontig_94689	572	1	901.167	998	0	189	725	1	572	1	1	537	537	35	572
s_1_1_contig100981	9371	s_1_1NewScaffoldedcontig_142891	s_1_1NewScaffoldedcontig_142891	2073	1	3719.83	4124	0	5592	7672	2073	1	1	-1	2073	2073	8	2081
s_1_1_contig100981	9371	s_1_1NewScaffoldedcontig_47147	s_1_1NewScaffoldedcontig_47147	12736	1	15609.4	17310	0	702	9369	26	8693	1	1	8663	8663	0	8668
s_1_1_contig100982	10120	s_1_1NewScaffoldedcontig_22418	s_1_1NewScaffoldedcontig_22418	691	1	1083.31	1200	0	1	647	691	1	1	-1	647	647	44	691
s_1_1_contig100982	10120	s_1_1NewScaffoldedcontig_105560	s_1_1NewScaffoldedcontig_105560	1536	1	2771.26	3072	0	1654	3189	1	1536	1	1	1536	1536	0	1536
s_1_1_contig100982	10120	s_1_1NewScaffoldedcontig_2125	s_1_1NewScaffoldedcontig_2125	72646	1	12183	13510	0	3348	10120	72646	65861	1	-1	6772	6772	13	6786
s_1_1_contig100983	12220	s_1_1NewScaffoldedcontig_20341	s_1_1NewScaffoldedcontig_20341	21509	1	20851.8	23124	0	13	11579	9665	21231	1	1	11565	11565	0	11567
s_1_1_contig100983	12220	s_1_1NewScaffoldedcontig_6476	s_1_1NewScaffoldedcontig_6476	30136	1	66.2076	72	1.71e-07	1	46	3767	3814	1	1	44	44	2	48
s_1_1_contig100983	12220	s_1_1NewScaffoldedcontig_146220	s_1_1NewScaffoldedcontig_146220	683	1	64.4042	70	5.98e-07	1	38	458	421	1	-1	37	37	0	38
s_1_1_contig100984	9966	s_1_1NewScaffoldedcontig_7434	s_1_1NewScaffoldedcontig_7434	28357	1	226.707	250	6.76e-56	1	245	26364	26639	1	1	215	215	35	278
s_1_1_contig100984	9966	s_1_1NewScaffoldedcontig_93709	s_1_1NewScaffoldedcontig_93709	5766	1	9905.39	10984	0	1	5497	5496	1	1	-1	5496	5496	1	5497
s_1_1_contig100984	9966	s_1_1NewScaffoldedcontig_52224	s_1_1NewScaffoldedcontig_52224	13384	1	4859.56	5388	0	7150	9853	1806	4509	1	1	2700	2700	0	2704
s_1_1_contig100989	21989	s_1_1NewScaffoldedcontig_5476	s_1_1NewScaffoldedcontig_5476	32292	1	38378.8	42562	0	586	21989	21463	63	1	-1	21354	21354	13	21409
s_1_1_contig100989	21989	s_1_1NewScaffoldedcontig_168300	s_1_1NewScaffoldedcontig_168300	834	1	224.904	248	5.21e-55	21829	21983	429	272	1	-1	145	145	3	158
s_1_1_contig100989	21989	s_1_1NewScaffoldedcontig_113871	s_1_1NewScaffoldedcontig_113871	1879	1	3384.41	3752	0	4194	6072	1879	1	1	-1	1878	1878	0	1879
s_1_1_contig100990	10536	s_1_1NewScaffoldedcontig_70616	s_1_1NewScaffoldedcontig_70616	12039	1	55.3874	60	0.000267019	3502	3549	5319	5366	1	1	41	41	0	48
s_1_1_contig100990	10536	s_1_1NewScaffoldedcontig_8738	s_1_1NewScaffoldedcontig_8738	34044	1	16651.8	18466	0	10	9252	14176	23420	1	1	9241	9241	2	9245
s_1_1_contig100990	10536	s_1_1NewScaffoldedcontig_113145	s_1_1NewScaffoldedcontig_113145	10397	1	53.584	58	0.000931988	3472	3555	4529	4446	1	-1	62	62	0	84
s_1_1_contig100991	9745	s_1_1NewScaffoldedcontig_164637	s_1_1NewScaffoldedcontig_164637	1942	1	2417.8	2680	0	1025	2364	1	1340	1	1	1340	1340	0	1340
s_1_1_contig100991	9745	s_1_1NewScaffoldedcontig_38112	s_1_1NewScaffoldedcontig_38112	3414	1	6152.58	6822	0	4420	7833	1	3414	1	1	3413	3413	0	3414
s_1_1_contig100991	9745	s_1_1NewScaffoldedcontig_16629	s_1_1NewScaffoldedcontig_16629	19169	1	12688	14070	0	2703	9745	16163	9121	1	-1	7040	7040	0	7043
s_1_1_contig100992	8024	s_1_1NewScaffoldedcontig_182186	s_1_1NewScaffoldedcontig_182186	1604	1	414.258	458	1.89e-112	7796	8024	1	229	1	1	229	229	0	229
s_1_1_contig100992	8024	s_1_1NewScaffoldedcontig_70940	s_1_1NewScaffoldedcontig_70940	21631	1	7559.2	8382	0	1	4197	14405	18604	1	1	4197	4197	3	4200
s_1_1_contig100992	8024	s_1_1NewScaffoldedcontig_31334	s_1_1NewScaffoldedcontig_31334	48123	1	55.3874	60	0.000203144	1997	2062	28373	28308	1	-1	54	54	2	67
s_1_1_contig100994	8946	s_1_1NewScaffoldedcontig_16868	s_1_1NewScaffoldedcontig_16868	14090	1	6515.05	7224	0	1	3612	10479	14090	1	1	3612	3612	0	3612
s_1_1_contig100994	8946	s_1_1NewScaffoldedcontig_133915	s_1_1NewScaffoldedcontig_133915	2935	1	5043.51	5592	0	6125	8946	2935	114	1	-1	2817	2817	6	2825
s_1_1_contig100994	8946	s_1_1NewScaffoldedcontig_114878	s_1_1NewScaffoldedcontig_114878	3030	1	5452.87	6046	0	3604	6632	1	3030	1	1	3028	3028	1	3030
s_1_1_contig100995	14567	s_1_1NewScaffoldedcontig_78389	s_1_1NewScaffoldedcontig_78389	15219	1	370.977	410	3.68e-99	6368	6718	11085	11422	1	1	293	293	13	351
s_1_1_contig100995	14567	s_1_1NewScaffoldedcontig_110177	s_1_1NewScaffoldedcontig_110177	23061	1	16893.4	18734	0	2085	11565	7119	16648	1	1	9456	9456	51	9531
s_1_1_contig100995	14567	s_1_1NewScaffoldedcontig_94031	s_1_1NewScaffoldedcontig_94031	2646	1	2902.91	3218	0	1	1609	1609	1	1	-1	1609	1609	0	1609
s_1_1_contig101000	19871	s_1_1NewScaffoldedcontig_46606	s_1_1NewScaffoldedcontig_46606	8561	1	55.3874	60	0.000504282	1	45	2857	2814	1	-1	41	41	3	46
s_1_1_contig101000	19871	s_1_1NewScaffoldedcontig_10218	s_1_1NewScaffoldedcontig_10218	32305	1	35715.2	39608	0	1	19834	32291	12456	1	-1	19824	19824	2	19836
s_1_1_contig101000	19871	s_1_1NewScaffoldedcontig_17194	s_1_1NewScaffoldedcontig_17194	52770	1	237.528	262	7.46e-59	14843	15322	37721	38200	1	1	344	344	6	483
s_1_1_contig101005	8938	s_1_1NewScaffoldedcontig_107847	s_1_1NewScaffoldedcontig_107847	4997	1	51.7806	56	0.00275793	5789	5851	3196	3135	1	-1	50	50	1	63
s_1_1_contig101005	8938	s_1_1NewScaffoldedcontig_3336	s_1_1NewScaffoldedcontig_3336	32394	1	16100	17854	0	1	8938	23451	32394	1	1	8937	8937	6	8944
s_1_1_contig101005	8938	s_1_1NewScaffoldedcontig_19097	s_1_1NewScaffoldedcontig_19097	19309	1	49.9773	54	0.00962614	4764	4809	5667	5709	1	1	39	39	3	46
s_1_1_contig101006	8860	s_1_1NewScaffoldedcontig_56542	s_1_1NewScaffoldedcontig_56542	17540	1	441.308	488	1.5e-120	6751	7268	10053	9519	1	-1	422	422	23	538
s_1_1_contig101006	8860	s_1_1NewScaffoldedcontig_129082	s_1_1NewScaffoldedcontig_129082	2894	1	5214.83	5782	0	1	2894	2894	1	1	-1	2893	2893	0	2894
s_1_1_contig101006	8860	s_1_1NewScaffoldedcontig_61166	s_1_1NewScaffoldedcontig_61166	34401	1	10808.9	11986	0	2852	8860	34401	28392	1	-1	6004	6004	1	6010
s_1_1_contig101007	9242	s_1_1NewScaffoldedcontig_76677	s_1_1NewScaffoldedcontig_76677	2853	1	295.235	326	1.47e-76	4371	4610	2445	2683	1	1	210	210	1	240
s_1_1_contig101007	9242	s_1_1NewScaffoldedcontig_36819	s_1_1NewScaffoldedcontig_36819	9399	1	8736.8	9688	0	4395	9242	4368	9216	1	1	4848	4848	1	4849
s_1_1_contig101007	9242	s_1_1NewScaffoldedcontig_79861	s_1_1NewScaffoldedcontig_79861	6348	1	300.646	332	3.46e-78	4372	4610	2793	2555	1	-1	210	210	0	239
s_1_1_contig101012	8509	s_1_1NewScaffoldedcontig_141850	s_1_1NewScaffoldedcontig_141850	1946	1	3451.13	3826	0	5593	7508	1	1916	1	1	1915	1915	0	1916
s_1_1_contig101012	8509	s_1_1NewScaffoldedcontig_15771	s_1_1NewScaffoldedcontig_15771	23465	1	9218.3	10222	0	399	5509	8158	13268	1	1	5111	5111	0	5111
s_1_1_contig101012	8509	s_1_1NewScaffoldedcontig_160027	s_1_1NewScaffoldedcontig_160027	535	1	966.089	1070	0	7649	8183	535	1	1	-1	535	535	0	535
s_1_1_contig101013	9493	s_1_1NewScaffoldedcontig_119930	s_1_1NewScaffoldedcontig_119930	5696	1	5584.52	6192	0	6398	9493	2598	5693	1	1	3096	3096	0	3096
s_1_1_contig101013	9493	s_1_1NewScaffoldedcontig_91882	s_1_1NewScaffoldedcontig_91882	3756	1	6684.57	7412	0	38	3773	1	3756	1	1	3733	3733	20	3756
s_1_1_contig101013	9493	s_1_1NewScaffoldedcontig_59225	s_1_1NewScaffoldedcontig_59225	2804	1	356.55	394	5.27e-95	6225	6527	934	631	1	-1	269	269	11	309
s_1_1_contig101026	12852	s_1_1NewScaffoldedcontig_20129	s_1_1NewScaffoldedcontig_20129	16742	1	22193.5	24612	0	476	12850	14481	2106	1	-1	12344	12344	1	12376
s_1_1_contig101026	12852	s_1_1NewScaffoldedcontig_82043	s_1_1NewScaffoldedcontig_82043	1856	1	235.724	260	1.68e-58	12702	12852	100	251	1	1	144	144	1	152
s_1_1_contig101026	12852	s_1_1NewScaffoldedcontig_67354	s_1_1NewScaffoldedcontig_67354	596	1	228.511	252	2.5e-56	12701	12852	562	410	1	-1	143	143	1	153
s_1_1_contig101027	12729	s_1_1NewScaffoldedcontig_16768	s_1_1NewScaffoldedcontig_16768	94749	1	22857.2	25348	0	1	12679	60612	73289	1	1	12678	12678	1	12679
s_1_1_contig101027	12729	s_1_1NewScaffoldedcontig_46532	s_1_1NewScaffoldedcontig_46532	2095	1	2390.75	2650	0	2591	3915	2095	771	1	-1	1325	1325	0	1325
s_1_1_contig101027	12729	s_1_1NewScaffoldedcontig_8828	s_1_1NewScaffoldedcontig_8828	13550	1	145.556	160	2.32e-31	12622	12726	1298	1402	1	1	95	95	0	105
s_1_1_contig101028	8888	s_1_1NewScaffoldedcontig_109364	s_1_1NewScaffoldedcontig_109364	6685	1	7555.6	8378	0	2055	6248	2492	6685	1	1	4192	4192	0	4194
s_1_1_contig101028	8888	s_1_1NewScaffoldedcontig_47419	s_1_1NewScaffoldedcontig_47419	2615	1	4677.42	5186	0	6225	8817	1	2593	1	1	2593	2593	0	2593
s_1_1_contig101028	8888	s_1_1NewScaffoldedcontig_166288	s_1_1NewScaffoldedcontig_166288	2129	1	3822.62	4238	0	4117	6245	1	2129	1	1	2125	2125	0	2129
s_1_1_contig101030	9760	s_1_1NewScaffoldedcontig_26999	s_1_1NewScaffoldedcontig_26999	43989	1	15445.3	17128	0	422	9100	24774	33402	1	1	8626	8626	52	8680
s_1_1_contig101030	9760	s_1_1NewScaffoldedcontig_83213	s_1_1NewScaffoldedcontig_83213	19140	1	150.966	166	4.18e-33	9651	9760	8746	8857	1	1	102	102	2	112
s_1_1_contig101030	9760	s_1_1NewScaffoldedcontig_18055	s_1_1NewScaffoldedcontig_18055	20441	1	150.966	166	4.18e-33	9650	9760	11016	10903	1	-1	102	102	3	114
s_1_1_contig101033	10597	s_1_1NewScaffoldedcontig_41876	s_1_1NewScaffoldedcontig_41876	4179	1	246.544	272	7.67e-62	10402	10597	2681	2876	1	1	172	172	0	196
s_1_1_contig101033	10597	s_1_1NewScaffoldedcontig_108112	s_1_1NewScaffoldedcontig_108112	8008	1	6181.43	6854	0	2833	6262	2838	6267	1	1	3429	3429	0	3430
s_1_1_contig101033	10597	s_1_1NewScaffoldedcontig_80011	s_1_1NewScaffoldedcontig_80011	3081	1	4387.08	4864	0	8159	10597	2830	393	1	-1	2437	2437	1	2439
s_1_1_contig101040	10903	s_1_1NewScaffoldedcontig_38023	s_1_1NewScaffoldedcontig_38023	1298	1	2325.83	2578	0	1	1297	2	1298	1	1	1294	1294	0	1297
s_1_1_contig101040	10903	s_1_1NewScaffoldedcontig_24926	s_1_1NewScaffoldedcontig_24926	14717	1	711.814	788	0	9925	10486	10002	10570	1	1	505	505	11	571
s_1_1_contig101040	10903	s_1_1NewScaffoldedcontig_34691	s_1_1NewScaffoldedcontig_34691	26831	1	14110.8	15648	0	829	8674	22508	14661	1	-1	7840	7840	2	7848
s_1_1_contig101041	27580	s_1_1NewScaffoldedcontig_82798	s_1_1NewScaffoldedcontig_82798	3074	1	5130.07	5688	0	392	3240	2849	1	1	-1	2847	2847	0	2849
s_1_1_contig101041	27580	s_1_1NewScaffoldedcontig_84010	s_1_1NewScaffoldedcontig_84010	1497	1	2700.93	2994	0	24044	25540	1497	1	1	-1	1497	1497	0	1497
s_1_1_contig101041	27580	s_1_1NewScaffoldedcontig_14205	s_1_1NewScaffoldedcontig_14205	76287	1	42665.4	47316	0	3217	26965	59980	36260	1	-1	23710	23710	28	23749
s_1_1_contig101045	17838	s_1_1NewScaffoldedcontig_130741	s_1_1NewScaffoldedcontig_130741	2019	1	3483.59	3862	0	13350	15333	2019	1	1	-1	1977	1977	35	2019
s_1_1_contig101045	17838	s_1_1NewScaffoldedcontig_26820	s_1_1NewScaffoldedcontig_26820	24008	1	30626.1	33964	0	1	17070	6883	24008	1	1	17057	17057	56	17126
s_1_1_contig101045	17838	s_1_1NewScaffoldedcontig_128078	s_1_1NewScaffoldedcontig_128078	803	1	1404.31	1556	0	17047	17838	803	1	1	-1	792	792	11	803
s_1_1_contig101047	15273	s_1_1NewScaffoldedcontig_113874	s_1_1NewScaffoldedcontig_113874	31177	1	51.7806	56	0.00472037	13306	13352	27657	27701	1	1	40	40	2	47
s_1_1_contig101047	15273	s_1_1NewScaffoldedcontig_76097	s_1_1NewScaffoldedcontig_76097	17359	1	27394.5	30380	0	1	15219	15230	1	1	-1	15214	15214	11	15230
s_1_1_contig101047	15273	s_1_1NewScaffoldedcontig_91586	s_1_1NewScaffoldedcontig_91586	7024	1	53.584	58	0.00135241	8748	8796	6585	6633	1	1	41	41	0	49
s_1_1_contig101053	10200	s_1_1NewScaffoldedcontig_94209	s_1_1NewScaffoldedcontig_94209	2985	1	187.033	206	6.07e-44	5968	6131	1690	1514	1	-1	146	146	13	177
s_1_1_contig101053	10200	s_1_1NewScaffoldedcontig_126161	s_1_1NewScaffoldedcontig_126161	3449	1	6120.12	6786	0	119	3511	57	3449	1	1	3393	3393	0	3393
s_1_1_contig101053	10200	s_1_1NewScaffoldedcontig_23500	s_1_1NewScaffoldedcontig_23500	13839	1	11943.2	13244	0	3542	10195	13839	7176	1	-1	6645	6645	10	6664
s_1_1_contig101055	17549	s_1_1NewScaffoldedcontig_8386	s_1_1NewScaffoldedcontig_8386	18566	1	31354.7	34772	0	49	17549	1	17524	1	1	17464	17464	41	17533
s_1_1_contig101055	17549	s_1_1NewScaffoldedcontig_71861	s_1_1NewScaffoldedcontig_71861	19312	1	48.1739	52	0.0660807	13131	13161	4080	4050	1	-1	29	29	0	31
s_1_1_contig101055	17549	s_1_1NewScaffoldedcontig_92108	s_1_1NewScaffoldedcontig_92108	2691	1	48.1739	52	0.0660807	5700	5730	2276	2305	1	1	30	30	1	31
s_1_1_contig101057	14824	s_1_1NewScaffoldedcontig_10237	s_1_1NewScaffoldedcontig_10237	34270	1	26550.5	29444	0	91	14824	34270	19538	1	-1	14730	14730	1	14734
s_1_1_contig101057	14824	s_1_1NewScaffoldedcontig_15348	s_1_1NewScaffoldedcontig_15348	15556	1	150.966	166	6.36e-33	9851	9977	13719	13584	1	-1	114	114	9	136
s_1_1_contig101057	14824	s_1_1NewScaffoldedcontig_62193	s_1_1NewScaffoldedcontig_62193	41139	1	150.966	166	6.36e-33	9848	9979	24841	24701	1	-1	117	117	9	141
s_1_1_contig101060	11446	s_1_1NewScaffoldedcontig_64731	s_1_1NewScaffoldedcontig_64731	2657	1	4778.41	5298	0	6132	8788	2657	1	1	-1	2654	2654	0	2657
s_1_1_contig101060	11446	s_1_1NewScaffoldedcontig_72294	s_1_1NewScaffoldedcontig_72294	2225	1	4004.77	4440	0	1931	4155	1	2225	1	1	2223	2223	0	2225
s_1_1_contig101060	11446	s_1_1NewScaffoldedcontig_54459	s_1_1NewScaffoldedcontig_54459	13597	1	20626.4	22874	0	1	11446	38	11484	1	1	11444	11444	1	11447
s_1_1_contig101061	10300	s_1_1NewScaffoldedcontig_140292	s_1_1NewScaffoldedcontig_140292	670	1	1133.8	1256	0	7614	8244	646	16	1	-1	630	630	0	631
s_1_1_contig101061	10300	s_1_1NewScaffoldedcontig_17461	s_1_1NewScaffoldedcontig_17461	71140	1	10527.5	11674	0	3733	9577	53622	59466	1	1	5842	5842	0	5845
s_1_1_contig101061	10300	s_1_1NewScaffoldedcontig_140293	s_1_1NewScaffoldedcontig_140293	747	1	1348.4	1494	0	9554	10300	1	747	1	1	747	747	0	747
s_1_1_contig101081	8172	s_1_1NewScaffoldedcontig_104588	s_1_1NewScaffoldedcontig_104588	2513	1	4500.69	4990	0	5342	7836	2513	19	1	-1	2495	2495	0	2495
s_1_1_contig101081	8172	s_1_1NewScaffoldedcontig_158674	s_1_1NewScaffoldedcontig_158674	1151	1	266.382	294	6.31e-68	1	280	1141	855	1	-1	237	237	11	289
s_1_1_contig101081	8172	s_1_1NewScaffoldedcontig_100401	s_1_1NewScaffoldedcontig_100401	5362	1	9631.28	10680	0	1	5365	1	5362	1	1	5358	5358	7	5367
s_1_1_contig101088	16801	s_1_1NewScaffoldedcontig_23766	s_1_1NewScaffoldedcontig_23766	22306	1	349.336	386	1.39e-92	8747	9320	1697	2270	1	1	424	424	2	575
s_1_1_contig101088	16801	s_1_1NewScaffoldedcontig_54365	s_1_1NewScaffoldedcontig_54365	18647	1	68.0109	74	6.75e-08	9071	9132	4298	4237	1	-1	52	52	0	62
s_1_1_contig101088	16801	s_1_1NewScaffoldedcontig_5676	s_1_1NewScaffoldedcontig_5676	22234	1	16776.2	18604	0	3075	12436	19004	9615	1	-1	9350	9350	28	9390
s_1_1_contig101090	17605	s_1_1NewScaffoldedcontig_111571	s_1_1NewScaffoldedcontig_111571	2136	1	3835.25	4252	0	14854	16984	2131	1	1	-1	2129	2129	0	2131
s_1_1_contig101090	17605	s_1_1NewScaffoldedcontig_48039	s_1_1NewScaffoldedcontig_48039	17628	1	31104	34494	0	1	17256	1	17257	1	1	17254	17254	1	17257
s_1_1_contig101090	17605	s_1_1NewScaffoldedcontig_48040	s_1_1NewScaffoldedcontig_48040	1982	1	3566.55	3954	0	3822	5803	1982	1	1	-1	1980	1980	0	1982
s_1_1_contig101092	9571	s_1_1NewScaffoldedcontig_56947	s_1_1NewScaffoldedcontig_56947	3847	1	6891.96	7642	0	4908	8732	1	3826	1	1	3825	3825	1	3826
s_1_1_contig101092	9571	s_1_1NewScaffoldedcontig_13771	s_1_1NewScaffoldedcontig_13771	7472	1	129.325	142	1.34e-26	2338	2468	7026	6896	1	-1	107	107	0	131
s_1_1_contig101092	9571	s_1_1NewScaffoldedcontig_112013	s_1_1NewScaffoldedcontig_112013	9039	1	8787.3	9744	0	40	4928	4158	9039	1	1	4882	4882	7	4889
s_1_1_contig101097	11208	s_1_1NewScaffoldedcontig_10731	s_1_1NewScaffoldedcontig_10731	28693	1	169	186	1.79e-38	5699	5866	14307	14476	1	1	141	141	4	171
s_1_1_contig101097	11208	s_1_1NewScaffoldedcontig_36460	s_1_1NewScaffoldedcontig_36460	22390	1	19091.7	21172	0	1	10639	22390	11756	1	-1	10621	10621	4	10639
s_1_1_contig101097	11208	s_1_1NewScaffoldedcontig_63183	s_1_1NewScaffoldedcontig_63183	17151	1	167.196	184	6.25e-38	5690	5866	4242	4062	1	-1	148	148	6	182
s_1_1_contig101098	9109	s_1_1NewScaffoldedcontig_37690	s_1_1NewScaffoldedcontig_37690	24397	1	16422.8	18212	0	1	9109	10464	1356	1	-1	9108	9108	0	9109
s_1_1_contig101098	9109	s_1_1NewScaffoldedcontig_11357	s_1_1NewScaffoldedcontig_11357	13241	1	116.702	128	8.05e-23	6197	6598	9004	9405	1	1	275	275	10	407
s_1_1_contig101098	9109	s_1_1NewScaffoldedcontig_74146	s_1_1NewScaffoldedcontig_74146	1626	1	2879.46	3192	0	21	1624	1	1604	1	1	1601	1601	0	1604
s_1_1_contig101099	12339	s_1_1NewScaffoldedcontig_138074	s_1_1NewScaffoldedcontig_138074	577	1	80.6345	88	7.86e-12	1	47	379	333	1	-1	46	46	0	47
s_1_1_contig101099	12339	s_1_1NewScaffoldedcontig_136394	s_1_1NewScaffoldedcontig_136394	645	1	78.8312	86	2.74e-11	2	47	12	57	1	1	45	45	0	46
s_1_1_contig101099	12339	s_1_1NewScaffoldedcontig_38197	s_1_1NewScaffoldedcontig_38197	32154	1	22110.6	24520	0	1	12268	25098	12831	1	-1	12265	12265	0	12268
s_1_1_contig101102	12325	s_1_1NewScaffoldedcontig_156172	s_1_1NewScaffoldedcontig_156172	1482	1	2664.86	2954	0	10759	12240	1482	1	1	-1	1480	1480	0	1482
s_1_1_contig101102	12325	s_1_1NewScaffoldedcontig_76653	s_1_1NewScaffoldedcontig_76653	2294	1	1541.36	1708	0	9098	9971	2114	1241	1	-1	866	866	0	874
s_1_1_contig101102	12325	s_1_1NewScaffoldedcontig_78567	s_1_1NewScaffoldedcontig_78567	45178	1	11780.9	13064	0	2627	9161	6086	12620	1	1	6534	6534	0	6535
s_1_1_contig101103	11578	s_1_1NewScaffoldedcontig_166650	s_1_1NewScaffoldedcontig_166650	2955	1	5265.32	5838	0	7411	10396	2955	1	1	-1	2955	2955	31	2986
s_1_1_contig101103	11578	s_1_1NewScaffoldedcontig_22980	s_1_1NewScaffoldedcontig_22980	28991	1	13957.6	15478	0	3827	11575	8838	16588	1	1	7747	7747	2	7751
s_1_1_contig101103	11578	s_1_1NewScaffoldedcontig_117960	s_1_1NewScaffoldedcontig_117960	15644	1	53.584	58	0.00102447	6516	6596	11249	11323	1	1	60	60	6	81
s_1_1_contig101104	8469	s_1_1NewScaffoldedcontig_98241	s_1_1NewScaffoldedcontig_98241	3799	1	6805.4	7546	0	676	4470	3799	1	1	-1	3790	3790	4	3799
s_1_1_contig101104	8469	s_1_1NewScaffoldedcontig_65564	s_1_1NewScaffoldedcontig_65564	4327	1	699.19	774	0	8083	8469	4327	3941	1	-1	387	387	0	387
s_1_1_contig101104	8469	s_1_1NewScaffoldedcontig_132935	s_1_1NewScaffoldedcontig_132935	14236	1	15245.2	16906	0	1	8469	29	8498	1	1	8464	8464	1	8470
s_1_1_contig101105	15211	s_1_1NewScaffoldedcontig_86813	s_1_1NewScaffoldedcontig_86813	2279	1	4111.16	4558	0	10409	12687	2279	1	1	-1	2279	2279	0	2279
s_1_1_contig101105	15211	s_1_1NewScaffoldedcontig_12853	s_1_1NewScaffoldedcontig_12853	15382	1	27196.1	30160	0	1	15137	15367	182	1	-1	15136	15136	49	15186
s_1_1_contig101105	15211	s_1_1NewScaffoldedcontig_135411	s_1_1NewScaffoldedcontig_135411	4983	1	68.0109	74	6.11e-08	2208	2264	4851	4907	1	1	49	49	0	57
s_1_1_contig101106	14555	s_1_1NewScaffoldedcontig_5777	s_1_1NewScaffoldedcontig_5777	4282	1	242.938	268	1.29e-60	5429	5590	2551	2387	1	-1	154	154	3	165
s_1_1_contig101106	14555	s_1_1NewScaffoldedcontig_16082	s_1_1NewScaffoldedcontig_16082	35023	1	246.544	272	1.06e-61	5429	5590	15067	15231	1	1	155	155	3	165
s_1_1_contig101106	14555	s_1_1NewScaffoldedcontig_40864	s_1_1NewScaffoldedcontig_40864	26179	1	25706.5	28508	0	1	14428	1	14410	1	1	14348	14348	24	14431
s_1_1_contig101107	8207	s_1_1NewScaffoldedcontig_56589	s_1_1NewScaffoldedcontig_56589	3948	1	140.146	154	6.35e-30	8096	8207	8	149	1	1	111	111	30	142
s_1_1_contig101107	8207	s_1_1NewScaffoldedcontig_42313	s_1_1NewScaffoldedcontig_42313	21428	1	114.899	126	2.53e-22	8095	8207	10943	11070	1	1	101	101	15	128
s_1_1_contig101107	8207	s_1_1NewScaffoldedcontig_28415	s_1_1NewScaffoldedcontig_28415	12988	1	14538.2	16122	0	23	8095	4914	12988	1	1	8071	8071	2	8075
s_1_1_contig101108	9020	s_1_1NewScaffoldedcontig_10880	s_1_1NewScaffoldedcontig_10880	9246	1	10655.6	11816	0	3113	9020	3249	9156	1	1	5908	5908	0	5908
s_1_1_contig101108	9020	s_1_1NewScaffoldedcontig_38554	s_1_1NewScaffoldedcontig_38554	6447	1	51.7806	56	0.00278334	712	749	6110	6073	1	-1	34	34	0	38
s_1_1_contig101108	9020	s_1_1NewScaffoldedcontig_124794	s_1_1NewScaffoldedcontig_124794	8691	1	49.9773	54	0.0097148	5121	5168	1263	1219	1	-1	40	40	3	48
s_1_1_contig101111	9073	s_1_1NewScaffoldedcontig_119704	s_1_1NewScaffoldedcontig_119704	12324	1	10974.8	12170	0	1	6085	6240	12324	1	1	6085	6085	0	6085
s_1_1_contig101111	9073	s_1_1NewScaffoldedcontig_124169	s_1_1NewScaffoldedcontig_124169	15916	1	5364.51	5948	0	6100	9073	15916	12943	1	-1	2974	2974	0	2974
s_1_1_contig101111	9073	s_1_1NewScaffoldedcontig_10932	s_1_1NewScaffoldedcontig_10932	20491	1	93.2581	102	9.14e-16	6131	6225	19032	18922	1	-1	86	86	16	111
s_1_1_contig101120	9576	s_1_1NewScaffoldedcontig_52942	s_1_1NewScaffoldedcontig_52942	12096	1	12255.2	13590	0	2719	9576	3129	9957	1	1	6829	6829	29	6858
s_1_1_contig101120	9576	s_1_1NewScaffoldedcontig_55421	s_1_1NewScaffoldedcontig_55421	2463	1	120.309	132	6.94e-24	45	127	93	177	1	1	78	78	2	85
s_1_1_contig101120	9576	s_1_1NewScaffoldedcontig_103358	s_1_1NewScaffoldedcontig_103358	1219	1	113.095	124	1.03e-21	45	127	7	90	1	1	76	76	1	84
s_1_1_contig101123	10380	s_1_1NewScaffoldedcontig_14374	s_1_1NewScaffoldedcontig_14374	6866	1	390.814	432	2.8e-105	770	1133	5618	5990	1	1	312	312	13	375
s_1_1_contig101123	10380	s_1_1NewScaffoldedcontig_94639	s_1_1NewScaffoldedcontig_94639	39202	1	17858.2	19804	0	462	10376	1	9915	1	1	9912	9912	2	9916
s_1_1_contig101123	10380	s_1_1NewScaffoldedcontig_129873	s_1_1NewScaffoldedcontig_129873	2829	1	5097.61	5652	0	1119	3947	1	2829	1	1	2828	2828	0	2829
s_1_1_contig101125	10450	s_1_1NewScaffoldedcontig_86553	s_1_1NewScaffoldedcontig_86553	4230	1	376.387	416	6.2e-101	5955	6295	2642	2985	1	1	291	291	3	344
s_1_1_contig101125	10450	s_1_1NewScaffoldedcontig_638	s_1_1NewScaffoldedcontig_638	10598	1	18734.7	20776	0	1	10450	92	10598	1	1	10450	10450	57	10507
s_1_1_contig101125	10450	s_1_1NewScaffoldedcontig_110897	s_1_1NewScaffoldedcontig_110897	12891	1	378.19	418	1.78e-101	5957	6310	2050	1693	1	-1	301	301	6	359
s_1_1_contig101129	10002	s_1_1NewScaffoldedcontig_53953	s_1_1NewScaffoldedcontig_53953	10622	1	10388.7	11520	0	1502	7264	4241	10003	1	1	5762	5762	0	5763
s_1_1_contig101129	10002	s_1_1NewScaffoldedcontig_49837	s_1_1NewScaffoldedcontig_49837	14265	1	2583.71	2864	0	8236	9754	12723	14265	1	1	1497	1497	24	1543
s_1_1_contig101129	10002	s_1_1NewScaffoldedcontig_48454	s_1_1NewScaffoldedcontig_48454	11182	1	578.364	640	9.38e-162	4062	4659	2894	2302	1	-1	494	494	17	604
s_1_1_contig101131	9887	s_1_1NewScaffoldedcontig_178579	s_1_1NewScaffoldedcontig_178579	741	1	1242	1376	0	5848	6535	688	1	1	-1	688	688	0	688
s_1_1_contig101131	9887	s_1_1NewScaffoldedcontig_76383	s_1_1NewScaffoldedcontig_76383	9693	1	9378.8	10400	0	626	5833	559	5766	1	1	5207	5207	2	5209
s_1_1_contig101131	9887	s_1_1NewScaffoldedcontig_86444	s_1_1NewScaffoldedcontig_86444	17342	1	4697.26	5208	0	6512	9118	17225	14619	1	-1	2606	2606	0	2607
s_1_1_contig101132	10720	s_1_1NewScaffoldedcontig_115797	s_1_1NewScaffoldedcontig_115797	5401	1	8154.32	9042	0	1105	5641	5401	857	1	-1	4536	4536	8	4545
s_1_1_contig101132	10720	s_1_1NewScaffoldedcontig_145526	s_1_1NewScaffoldedcontig_145526	4362	1	7853.15	8708	0	6292	10653	1	4362	1	1	4359	4359	0	4362
s_1_1_contig101132	10720	s_1_1NewScaffoldedcontig_80494	s_1_1NewScaffoldedcontig_80494	612	1	1038.22	1150	0	26	621	1	612	1	1	595	595	16	612
s_1_1_contig101141	9491	s_1_1NewScaffoldedcontig_154411	s_1_1NewScaffoldedcontig_154411	2557	1	4596.27	5096	0	3735	6292	1	2557	1	1	2555	2555	1	2558
s_1_1_contig101141	9491	s_1_1NewScaffoldedcontig_46425	s_1_1NewScaffoldedcontig_46425	9550	1	6781.95	7520	0	28	3787	9550	5791	1	-1	3760	3760	0	3760
s_1_1_contig101141	9491	s_1_1NewScaffoldedcontig_185273	s_1_1NewScaffoldedcontig_185273	896	1	1608.09	1782	0	6102	6996	1	896	1	1	895	895	1	896
s_1_1_contig101143	8518	s_1_1NewScaffoldedcontig_17168	s_1_1NewScaffoldedcontig_17168	34824	1	14563.5	16150	0	444	8518	16845	24919	1	1	8075	8075	0	8075
s_1_1_contig101143	8518	s_1_1NewScaffoldedcontig_48158	s_1_1NewScaffoldedcontig_48158	14502	1	138.342	152	2.3e-29	7147	7306	13834	13678	1	-1	127	127	3	160
s_1_1_contig101143	8518	s_1_1NewScaffoldedcontig_37125	s_1_1NewScaffoldedcontig_37125	34777	1	48.1739	52	0.0320135	7202	7293	13187	13100	1	-1	67	67	4	92
s_1_1_contig101148	10085	s_1_1NewScaffoldedcontig_58812	s_1_1NewScaffoldedcontig_58812	6670	1	361.96	400	1.32e-96	7452	7892	3462	3905	1	1	348	348	5	445
s_1_1_contig101148	10085	s_1_1NewScaffoldedcontig_13830	s_1_1NewScaffoldedcontig_13830	15230	1	374.584	414	2.09e-100	7440	7892	2692	3150	1	1	360	360	6	459
s_1_1_contig101148	10085	s_1_1NewScaffoldedcontig_28020	s_1_1NewScaffoldedcontig_28020	14112	1	7173.28	7954	0	1409	5494	8507	4450	1	-1	4033	4033	28	4086
s_1_1_contig101154	8594	s_1_1NewScaffoldedcontig_20521	s_1_1NewScaffoldedcontig_20521	70655	1	12275	13612	0	864	7684	66127	59305	1	-1	6818	6818	2	6823
s_1_1_contig101154	8594	s_1_1NewScaffoldedcontig_59346	s_1_1NewScaffoldedcontig_59346	34390	1	71.6177	78	2.83e-09	1	39	17490	17452	1	-1	39	39	0	39
s_1_1_contig101154	8594	s_1_1NewScaffoldedcontig_79326	s_1_1NewScaffoldedcontig_79326	2974	1	5364.51	5948	0	3354	6327	2974	1	1	-1	2974	2974	0	2974
s_1_1_contig101155	12892	s_1_1NewScaffoldedcontig_34614	s_1_1NewScaffoldedcontig_34614	14584	1	239.331	264	1.39e-59	7447	7629	14004	14186	1	1	165	165	2	184
s_1_1_contig101155	12892	s_1_1NewScaffoldedcontig_11241	s_1_1NewScaffoldedcontig_11241	122589	1	244.741	270	3.26e-61	7443	7629	957	1142	1	1	167	167	1	187
s_1_1_contig101155	12892	s_1_1NewScaffoldedcontig_66454	s_1_1NewScaffoldedcontig_66454	24145	1	23239.5	25772	0	1	12892	22101	9209	1	-1	12891	12891	1	12893
s_1_1_contig101157	16642	s_1_1NewScaffoldedcontig_18346	s_1_1NewScaffoldedcontig_18346	24182	1	16455.2	18248	0	1	9156	24182	15030	1	-1	9147	9147	5	9157
s_1_1_contig101157	16642	s_1_1NewScaffoldedcontig_127244	s_1_1NewScaffoldedcontig_127244	6157	1	7894.63	8754	0	10803	15182	6157	1778	1	-1	4379	4379	0	4380
s_1_1_contig101157	16642	s_1_1NewScaffoldedcontig_154125	s_1_1NewScaffoldedcontig_154125	1165	1	2076.96	2302	0	9634	10796	1	1165	1	1	1160	1160	2	1165
s_1_1_contig101159	8222	s_1_1NewScaffoldedcontig_66246	s_1_1NewScaffoldedcontig_66246	8076	1	179.82	198	7.25e-42	6922	7130	958	735	1	-1	173	173	15	224
s_1_1_contig101159	8222	s_1_1NewScaffoldedcontig_2751	s_1_1NewScaffoldedcontig_2751	3999	1	176.213	194	8.84e-41	6912	7129	988	1228	1	1	184	184	23	241
s_1_1_contig101159	8222	s_1_1NewScaffoldedcontig_50368	s_1_1NewScaffoldedcontig_50368	20513	1	14779.9	16390	0	1	8222	17385	9140	1	-1	8222	8222	24	8246
s_1_1_contig101162	14056	s_1_1NewScaffoldedcontig_36363	s_1_1NewScaffoldedcontig_36363	25670	1	13376.9	14834	0	5526	12961	1	7440	1	1	7431	7431	4	7440
s_1_1_contig101162	14056	s_1_1NewScaffoldedcontig_157869	s_1_1NewScaffoldedcontig_157869	2086	1	744.274	824	0	13497	13963	2086	1618	1	-1	453	453	12	474
s_1_1_contig101162	14056	s_1_1NewScaffoldedcontig_7130	s_1_1NewScaffoldedcontig_7130	60538	1	9845.88	10918	0	14	5530	13860	8326	1	-1	5505	5505	28	5540
s_1_1_contig101163	17779	s_1_1NewScaffoldedcontig_186770	s_1_1NewScaffoldedcontig_186770	934	1	1685.63	1868	0	16846	17779	934	1	1	-1	934	934	0	934
s_1_1_contig101163	17779	s_1_1NewScaffoldedcontig_17039	s_1_1NewScaffoldedcontig_17039	54978	1	30355.6	33664	0	26	16865	16840	1	1	-1	16837	16837	0	16840
s_1_1_contig101163	17779	s_1_1NewScaffoldedcontig_122921	s_1_1NewScaffoldedcontig_122921	2716	1	4884.81	5416	0	12815	15530	1	2716	1	1	2713	2713	0	2716
s_1_1_contig101165	10431	s_1_1NewScaffoldedcontig_2645	s_1_1NewScaffoldedcontig_2645	28699	1	322.286	356	1.2e-84	6733	7296	22995	22464	1	-1	415	415	70	583
s_1_1_contig101165	10431	s_1_1NewScaffoldedcontig_85887	s_1_1NewScaffoldedcontig_85887	19000	1	12262.4	13598	0	1	6807	12194	19000	1	1	6806	6806	2	6808
s_1_1_contig101165	10431	s_1_1NewScaffoldedcontig_174036	s_1_1NewScaffoldedcontig_174036	3259	1	5858.63	6496	0	7172	10431	3259	1	1	-1	3256	3256	1	3260
s_1_1_contig101166	10065	s_1_1NewScaffoldedcontig_177446	s_1_1NewScaffoldedcontig_177446	695	1	1254.63	1390	0	2703	3397	1	695	1	1	695	695	0	695
s_1_1_contig101166	10065	s_1_1NewScaffoldedcontig_97185	s_1_1NewScaffoldedcontig_97185	9987	1	6763.92	7500	0	6258	10012	6233	9987	1	1	3753	3753	0	3755
s_1_1_contig101166	10065	s_1_1NewScaffoldedcontig_83545	s_1_1NewScaffoldedcontig_83545	7037	1	1570.22	1740	0	5412	6281	1485	2354	1	1	870	870	0	870
s_1_1_contig101167	17706	s_1_1NewScaffoldedcontig_67020	s_1_1NewScaffoldedcontig_67020	8415	1	11308.4	12540	0	1	6338	2049	8393	1	1	6316	6316	9	6346
s_1_1_contig101167	17706	s_1_1NewScaffoldedcontig_10870	s_1_1NewScaffoldedcontig_10870	6424	1	11580.7	12842	0	7752	14175	1	6424	1	1	6423	6423	0	6424
s_1_1_contig101167	17706	s_1_1NewScaffoldedcontig_95169	s_1_1NewScaffoldedcontig_95169	7913	1	6379.8	7074	0	14170	17706	1	3537	1	1	3537	3537	0	3537
s_1_1_contig10117	8705	s_1_1NewScaffoldedcontig_68013	s_1_1NewScaffoldedcontig_68013	16104	1	48.1739	52	0.0327192	5936	5961	3729	3754	1	1	26	26	0	26
s_1_1_contig10117	8705	s_1_1NewScaffoldedcontig_31230	s_1_1NewScaffoldedcontig_31230	22718	1	46.3705	50	0.114201	6538	6569	54	25	1	-1	30	30	2	32
s_1_1_contig10117	8705	s_1_1NewScaffoldedcontig_45843	s_1_1NewScaffoldedcontig_45843	30526	1	15131.6	16780	0	254	8643	3911	12300	1	1	8390	8390	0	8390
s_1_1_contig101173	13747	s_1_1NewScaffoldedcontig_3853	s_1_1NewScaffoldedcontig_3853	9035	1	96.8649	106	1.14e-16	2	87	4885	4792	1	-1	77	77	8	94
s_1_1_contig101173	13747	s_1_1NewScaffoldedcontig_2670	s_1_1NewScaffoldedcontig_2670	42550	1	24684	27374	0	18	13747	28777	15037	1	-1	13717	13717	11	13741
s_1_1_contig101173	13747	s_1_1NewScaffoldedcontig_72151	s_1_1NewScaffoldedcontig_72151	2029	1	3651.3	4048	0	5015	7043	2029	1	1	-1	2027	2027	0	2029
s_1_1_contig101174	8099	s_1_1NewScaffoldedcontig_93892	s_1_1NewScaffoldedcontig_93892	7204	1	306.056	338	7.13e-80	7398	7566	7204	7036	1	-1	169	169	0	169
s_1_1_contig101174	8099	s_1_1NewScaffoldedcontig_74107	s_1_1NewScaffoldedcontig_74107	5588	1	10078.5	11176	0	38	5625	1	5588	1	1	5588	5588	0	5588
s_1_1_contig101174	8099	s_1_1NewScaffoldedcontig_92369	s_1_1NewScaffoldedcontig_92369	1449	1	2284.35	2532	0	5838	7216	1	1449	1	1	1360	1360	70	1449
s_1_1_contig101178	15458	s_1_1NewScaffoldedcontig_61209	s_1_1NewScaffoldedcontig_61209	10809	1	19441.6	21560	0	814	11624	10809	1	1	-1	10803	10803	8	10814
s_1_1_contig101178	15458	s_1_1NewScaffoldedcontig_98190	s_1_1NewScaffoldedcontig_98190	3910	1	5166.13	5728	0	12390	15253	1047	3910	1	1	2864	2864	0	2864
s_1_1_contig101178	15458	s_1_1NewScaffoldedcontig_47056	s_1_1NewScaffoldedcontig_47056	17700	1	363.763	402	5.79e-97	15205	15458	15365	15107	1	-1	236	236	5	259
s_1_1_contig101180	15499	s_1_1NewScaffoldedcontig_144	s_1_1NewScaffoldedcontig_144	16628	1	269.988	298	9.85e-69	6167	6376	4937	4731	1	-1	186	186	3	210
s_1_1_contig101180	15499	s_1_1NewScaffoldedcontig_45029	s_1_1NewScaffoldedcontig_45029	23713	1	14981.9	16614	0	145	8459	8358	16672	1	1	8312	8312	0	8315
s_1_1_contig101180	15499	s_1_1NewScaffoldedcontig_29066	s_1_1NewScaffoldedcontig_29066	8883	1	264.578	292	4.19e-67	6168	6376	2316	2527	1	1	188	188	3	212
s_1_1_contig101190	9208	s_1_1NewScaffoldedcontig_121767	s_1_1NewScaffoldedcontig_121767	5611	1	111.292	122	3.46e-21	8553	8627	4518	4443	1	-1	71	71	1	76
s_1_1_contig101190	9208	s_1_1NewScaffoldedcontig_118963	s_1_1NewScaffoldedcontig_118963	540	1	933.628	1034	0	8689	9208	21	540	1	1	519	519	0	520
s_1_1_contig101190	9208	s_1_1NewScaffoldedcontig_13538	s_1_1NewScaffoldedcontig_13538	43165	1	9277.82	10288	0	3438	8581	5144	1	1	-1	5144	5144	0	5144
s_1_1_contig101192	12175	s_1_1NewScaffoldedcontig_14535	s_1_1NewScaffoldedcontig_14535	15386	1	122.112	134	2.53e-24	2	75	10927	10999	1	1	72	72	1	74
s_1_1_contig101192	12175	s_1_1NewScaffoldedcontig_16768	s_1_1NewScaffoldedcontig_16768	94749	1	20065.6	22252	0	831	11961	74097	85229	1	1	11131	11131	2	11133
s_1_1_contig101192	12175	s_1_1NewScaffoldedcontig_176654	s_1_1NewScaffoldedcontig_176654	719	1	1216.76	1348	0	68	765	1	719	1	1	698	698	21	719
s_1_1_contig101196	13917	s_1_1NewScaffoldedcontig_38021	s_1_1NewScaffoldedcontig_38021	29326	1	22970.8	25474	0	1117	13870	23686	10934	1	-1	12748	12748	1	12754
s_1_1_contig101196	13917	s_1_1NewScaffoldedcontig_83531	s_1_1NewScaffoldedcontig_83531	699	1	1261.84	1398	0	1	699	1	699	1	1	699	699	0	699
s_1_1_contig101196	13917	s_1_1NewScaffoldedcontig_127392	s_1_1NewScaffoldedcontig_127392	5615	1	147.359	162	7.27e-32	13829	13917	4017	3929	1	-1	86	86	0	89
s_1_1_contig101200	8493	s_1_1NewScaffoldedcontig_47896	s_1_1NewScaffoldedcontig_47896	27427	1	3833.45	4250	0	3313	5437	9188	7064	1	-1	2125	2125	0	2125
s_1_1_contig101200	8493	s_1_1NewScaffoldedcontig_91384	s_1_1NewScaffoldedcontig_91384	22504	1	78.8312	86	1.88e-11	8074	8141	9224	9158	1	-1	59	59	1	68
s_1_1_contig101200	8493	s_1_1NewScaffoldedcontig_43576	s_1_1NewScaffoldedcontig_43576	57346	1	2975.04	3298	0	61	1709	5990	4342	1	-1	1649	1649	0	1649
s_1_1_contig101201	8299	s_1_1NewScaffoldedcontig_73065	s_1_1NewScaffoldedcontig_73065	38493	1	109.488	120	1.09e-20	108	180	23228	23156	1	-1	68	68	0	73
s_1_1_contig101201	8299	s_1_1NewScaffoldedcontig_27691	s_1_1NewScaffoldedcontig_27691	13458	1	14774.5	16384	0	108	8299	1103	9294	1	1	8192	8192	0	8192
s_1_1_contig101201	8299	s_1_1NewScaffoldedcontig_44611	s_1_1NewScaffoldedcontig_44611	18216	1	109.488	120	1.09e-20	72	180	3895	3791	1	-1	91	91	6	110
s_1_1_contig101206	16603	s_1_1NewScaffoldedcontig_32661	s_1_1NewScaffoldedcontig_32661	17970	1	9068.62	10056	0	1114	6149	5036	1	1	-1	5035	5035	2	5037
s_1_1_contig101206	16603	s_1_1NewScaffoldedcontig_47112	s_1_1NewScaffoldedcontig_47112	13372	1	16372.3	18156	0	7510	16603	12275	3181	1	-1	9089	9089	1	9095
s_1_1_contig101206	16603	s_1_1NewScaffoldedcontig_163697	s_1_1NewScaffoldedcontig_163697	686	1	1229.38	1362	0	6352	7036	686	1	1	-1	685	685	1	686
s_1_1_contig101209	10563	s_1_1NewScaffoldedcontig_33466	s_1_1NewScaffoldedcontig_33466	3409	1	2479.12	2748	0	9180	10563	3409	2024	1	-1	1382	1382	2	1386
s_1_1_contig101209	10563	s_1_1NewScaffoldedcontig_25232	s_1_1NewScaffoldedcontig_25232	7852	1	13957.6	15478	0	5	7748	7852	109	1	-1	7742	7742	0	7744
s_1_1_contig101209	10563	s_1_1NewScaffoldedcontig_113479	s_1_1NewScaffoldedcontig_113479	686	1	1223.97	1356	0	7886	8576	1	686	1	1	686	686	5	691
s_1_1_contig101211	9377	s_1_1NewScaffoldedcontig_60025	s_1_1NewScaffoldedcontig_60025	2269	1	3431.29	3804	0	7473	9377	2269	365	1	-1	1904	1904	0	1905
s_1_1_contig101211	9377	s_1_1NewScaffoldedcontig_61532	s_1_1NewScaffoldedcontig_61532	7367	1	5000.22	5544	0	4101	6879	2777	1	1	-1	2777	2777	2	2779
s_1_1_contig101211	9377	s_1_1NewScaffoldedcontig_175787	s_1_1NewScaffoldedcontig_175787	1417	1	2450.26	2716	0	1967	3355	1	1417	1	1	1389	1389	28	1417
s_1_1_contig101213	9301	s_1_1NewScaffoldedcontig_129107	s_1_1NewScaffoldedcontig_129107	2191	1	3943.45	4372	0	2179	4368	2191	1	1	-1	2190	2190	1	2191
s_1_1_contig101213	9301	s_1_1NewScaffoldedcontig_32783	s_1_1NewScaffoldedcontig_32783	11505	1	16751	18576	0	1	9301	9301	1	1	-1	9298	9298	2	9302
s_1_1_contig101213	9301	s_1_1NewScaffoldedcontig_168300	s_1_1NewScaffoldedcontig_168300	834	1	176.213	194	1e-40	9162	9301	402	260	1	-1	125	125	3	143
s_1_1_contig101215	8921	s_1_1NewScaffoldedcontig_25675	s_1_1NewScaffoldedcontig_25675	33820	1	16069.3	17820	0	1	8915	5366	14280	1	1	8913	8913	0	8915
s_1_1_contig101215	8921	s_1_1NewScaffoldedcontig_83553	s_1_1NewScaffoldedcontig_83553	19537	1	51.7806	56	0.00275267	4213	4256	9013	8969	1	-1	39	39	1	45
s_1_1_contig101215	8921	s_1_1NewScaffoldedcontig_82817	s_1_1NewScaffoldedcontig_82817	3692	1	53.584	58	0.000788653	4225	4260	104	141	1	1	35	35	2	38
s_1_1_contig101217	9184	s_1_1NewScaffoldedcontig_113092	s_1_1NewScaffoldedcontig_113092	1145	1	2048.11	2270	0	3141	4275	1145	11	1	-1	1135	1135	0	1135
s_1_1_contig101217	9184	s_1_1NewScaffoldedcontig_76120	s_1_1NewScaffoldedcontig_76120	20626	1	369.174	408	8.08e-99	3778	4209	4473	4049	1	-1	348	348	13	435
s_1_1_contig101217	9184	s_1_1NewScaffoldedcontig_50790	s_1_1NewScaffoldedcontig_50790	21046	1	5678.29	6296	0	5977	9127	9356	6206	1	-1	3150	3150	0	3151
s_1_1_contig101221	10121	s_1_1NewScaffoldedcontig_101568	s_1_1NewScaffoldedcontig_101568	873	1	783.948	868	0	9688	10121	434	1	1	-1	434	434	0	434
s_1_1_contig101221	10121	s_1_1NewScaffoldedcontig_105094	s_1_1NewScaffoldedcontig_105094	9272	1	16621.1	18432	0	62	9277	1	9216	1	1	9216	9216	0	9216
s_1_1_contig101221	10121	s_1_1NewScaffoldedcontig_135462	s_1_1NewScaffoldedcontig_135462	2150	1	3218.5	3568	0	2765	4563	358	2150	1	1	1793	1793	6	1799
s_1_1_contig101224	11511	s_1_1NewScaffoldedcontig_100232	s_1_1NewScaffoldedcontig_100232	5598	1	9910.8	10990	0	1	5514	5515	1	1	-1	5510	5510	3	5516
s_1_1_contig101224	11511	s_1_1NewScaffoldedcontig_172466	s_1_1NewScaffoldedcontig_172466	2083	1	2026.47	2246	0	9413	10540	2083	956	1	-1	1126	1126	0	1128
s_1_1_contig101224	11511	s_1_1NewScaffoldedcontig_159174	s_1_1NewScaffoldedcontig_159174	1958	1	2172.54	2408	0	6181	7422	325	1599	1	1	1241	1241	33	1275
s_1_1_contig101232	10034	s_1_1NewScaffoldedcontig_110897	s_1_1NewScaffoldedcontig_110897	12891	1	401.634	444	1.49e-108	5304	5647	1605	1945	1	1	299	299	5	345
s_1_1_contig101232	10034	s_1_1NewScaffoldedcontig_2546	s_1_1NewScaffoldedcontig_2546	23857	1	8116.45	9000	0	5476	9978	23857	19355	1	-1	4502	4502	0	4503
s_1_1_contig101232	10034	s_1_1NewScaffoldedcontig_16445	s_1_1NewScaffoldedcontig_16445	9424	1	9923.42	11004	0	1	5502	3923	9424	1	1	5502	5502	0	5502
s_1_1_contig101235	18850	s_1_1NewScaffoldedcontig_111768	s_1_1NewScaffoldedcontig_111768	8845	1	206.87	228	1.2e-49	8650	8810	7079	7241	1	1	144	144	2	163
s_1_1_contig101235	18850	s_1_1NewScaffoldedcontig_38762	s_1_1NewScaffoldedcontig_38762	32114	1	12756.5	14146	0	7063	14138	16903	9828	1	-1	7075	7075	0	7076
s_1_1_contig101235	18850	s_1_1NewScaffoldedcontig_110241	s_1_1NewScaffoldedcontig_110241	2992	1	84.2413	92	9.86e-13	11339	11512	1050	1223	1	1	123	123	0	174
s_1_1_contig101236	13196	s_1_1NewScaffoldedcontig_31079	s_1_1NewScaffoldedcontig_31079	8982	1	53.584	58	0.00116807	9041	9089	3470	3518	1	1	41	41	0	49
s_1_1_contig101236	13196	s_1_1NewScaffoldedcontig_15562	s_1_1NewScaffoldedcontig_15562	24274	1	22720.1	25196	0	599	13196	1	12598	1	1	12598	12598	0	12598
s_1_1_contig101236	13196	s_1_1NewScaffoldedcontig_109986	s_1_1NewScaffoldedcontig_109986	7378	1	46.3705	50	0.173357	7283	7317	7128	7162	1	1	31	31	0	35
s_1_1_contig101238	9839	s_1_1NewScaffoldedcontig_27759	s_1_1NewScaffoldedcontig_27759	27000	1	194.247	214	3.94e-46	1	139	24055	24192	1	1	127	127	1	139
s_1_1_contig101238	9839	s_1_1NewScaffoldedcontig_18989	s_1_1NewScaffoldedcontig_18989	27285	1	17723	19654	0	1	9839	8077	17913	1	1	9835	9835	2	9839
s_1_1_contig101238	9839	s_1_1NewScaffoldedcontig_114083	s_1_1NewScaffoldedcontig_114083	9689	1	201.46	222	2.66e-48	1	140	6705	6845	1	1	130	130	1	141
s_1_1_contig101246	8868	s_1_1NewScaffoldedcontig_22780	s_1_1NewScaffoldedcontig_22780	27914	1	12612.2	13986	0	150	7150	12783	19783	1	1	6998	6998	0	7001
s_1_1_contig101246	8868	s_1_1NewScaffoldedcontig_74482	s_1_1NewScaffoldedcontig_74482	1787	1	3195.05	3542	0	7098	8868	1787	17	1	-1	1771	1771	0	1771
s_1_1_contig101246	8868	s_1_1NewScaffoldedcontig_71997	s_1_1NewScaffoldedcontig_71997	7033	1	105.882	116	1.42e-19	7117	7182	2920	2985	1	1	63	63	0	66
s_1_1_contig101247	12362	s_1_1NewScaffoldedcontig_155845	s_1_1NewScaffoldedcontig_155845	555	1	1002.16	1110	0	4561	5115	1	555	1	1	555	555	0	555
s_1_1_contig101247	12362	s_1_1NewScaffoldedcontig_20011	s_1_1NewScaffoldedcontig_20011	41115	1	12911.6	14318	0	5195	12362	1	7166	1	1	7166	7166	2	7168
s_1_1_contig101247	12362	s_1_1NewScaffoldedcontig_106818	s_1_1NewScaffoldedcontig_106818	12502	1	7454.61	8266	0	2	4134	4133	1	1	-1	4133	4133	0	4133
s_1_1_contig101248	9488	s_1_1NewScaffoldedcontig_89096	s_1_1NewScaffoldedcontig_89096	12053	1	7712.49	8552	0	1721	6003	10342	6058	1	-1	4282	4282	2	4285
s_1_1_contig101248	9488	s_1_1NewScaffoldedcontig_114155	s_1_1NewScaffoldedcontig_114155	7310	1	318.679	352	1.32e-83	3045	3615	4166	3584	1	-1	430	430	42	598
s_1_1_contig101248	9488	s_1_1NewScaffoldedcontig_30070	s_1_1NewScaffoldedcontig_30070	20443	1	288.022	318	2.24e-74	3130	3613	9179	8695	1	-1	363	363	15	492
s_1_1_contig101252	14000	s_1_1NewScaffoldedcontig_41472	s_1_1NewScaffoldedcontig_41472	10784	1	11268.7	12496	0	4778	11033	4529	10784	1	1	6253	6253	0	6256
s_1_1_contig101252	14000	s_1_1NewScaffoldedcontig_16831	s_1_1NewScaffoldedcontig_16831	38396	1	389.011	430	1.32e-104	1	240	30131	30370	1	1	230	230	0	240
s_1_1_contig101252	14000	s_1_1NewScaffoldedcontig_6591	s_1_1NewScaffoldedcontig_6591	22893	1	3339.32	3702	0	11501	13351	22893	21043	1	-1	1851	1851	0	1851
s_1_1_contig101253	8867	s_1_1NewScaffoldedcontig_44256	s_1_1NewScaffoldedcontig_44256	12216	1	10085.7	11184	0	1044	6713	1	5652	1	1	5640	5640	38	5680
s_1_1_contig101253	8867	s_1_1NewScaffoldedcontig_54053	s_1_1NewScaffoldedcontig_54053	37949	1	1276.27	1414	0	157	871	718	1	1	-1	714	714	3	718
s_1_1_contig101253	8867	s_1_1NewScaffoldedcontig_44257	s_1_1NewScaffoldedcontig_44257	1167	1	1806.46	2002	0	6988	7988	1167	167	1	-1	1001	1001	0	1001
s_1_1_contig101259	8498	s_1_1NewScaffoldedcontig_10846	s_1_1NewScaffoldedcontig_10846	47635	1	407.044	450	2.98e-110	7275	7837	14010	14590	1	1	444	444	26	585
s_1_1_contig101259	8498	s_1_1NewScaffoldedcontig_51822	s_1_1NewScaffoldedcontig_51822	1982	1	2060.73	2284	0	5996	7168	1	1201	1	1	1173	1173	28	1201
s_1_1_contig101259	8498	s_1_1NewScaffoldedcontig_16345	s_1_1NewScaffoldedcontig_16345	20972	1	9948.67	11032	0	1	5524	20939	15416	1	-1	5521	5521	0	5524
s_1_1_contig101269	8467	s_1_1NewScaffoldedcontig_68870	s_1_1NewScaffoldedcontig_68870	23371	1	6778.35	7516	0	4710	8467	4502	8259	1	1	3758	3758	0	3758
s_1_1_contig101269	8467	s_1_1NewScaffoldedcontig_51382	s_1_1NewScaffoldedcontig_51382	30460	1	48.1739	52	0.031821	15	48	5135	5168	1	1	31	31	0	34
s_1_1_contig101269	8467	s_1_1NewScaffoldedcontig_8868	s_1_1NewScaffoldedcontig_8868	2673	1	62.6008	68	1.44e-06	1558	1611	2074	2021	1	-1	46	46	0	54
s_1_1_contig101277	14411	s_1_1NewScaffoldedcontig_36061	s_1_1NewScaffoldedcontig_36061	62029	1	457.539	506	3.19e-125	8267	8532	53090	53355	1	1	261	261	0	266
[truncated: 92,915 more rows]
