# Supplementary material for: A Multi-Platform Draft de novo Genome Assembly and Comparative Analysis for the Scarlet Macaw (Ara macao)
Source: PLoS One. 2013 May 8;8(5):e62415. doi: 10.1371/journal.pone.0062415 (PMC3648530; doi:10.1371/journal.pone.0062415)
Supplement: Table S4 — Summary of the simple de novo scarlet macaw comparative genome alignments using blastn. (XLSX) [file pone.0062415.s005.xlsx]

## Sheet: SMACvsGallusConsolidateSorted
Table S2-A G. gallus align
Query	Hit/Subject Chromosome	% Identity	Align Length	Mismatches	Gaps	q-start	q-end	hit-start	hit-end	evalue	bitscore	Total hits	Single or Multi Chromosome
s_1_1_contig192130	gi|118135635|ref|NC_006088.2chromosome1	78.95	57	11	1	463	519	10991	10936	0.009	46	19	M
s_1_1_contig48419	gi|118135635|ref|NC_006088.2chromosome1	77.78	54	12	0	1	54	14485	14538	0.02	45	9	M
s_1_1_contig136134	gi|118135635|ref|NC_006088.2chromosome1	84.03	144	23	0	2374	2517	28065	28208	4e-35	156	1	S
s_1_1_contig82005	gi|118135635|ref|NC_006088.2chromosome1	66.99	312	92	3	3344	3647	29215	28907	1e-16	95	81	M
s_1_1_contig270682	gi|118135635|ref|NC_006088.2chromosome1	77.67	103	14	4	1601	1703	29261	29168	1e-10	73	157	M
s_1_1_contig253434	gi|118135635|ref|NC_006088.2chromosome1	83.72	43	5	1	595	635	35015	35057	0.029	45	50	M
s_1_1_contig160077	gi|118135635|ref|NC_006088.2chromosome1	79.91	224	45	0	3966	4189	36095	36318	1e-48	201	133	M
s_1_1_contig112073	gi|118135635|ref|NC_006088.2chromosome1	72.09	1365	314	25	8059	9382	44408	45746	0	691	2	S
s_1_1_contig147863	gi|118135635|ref|NC_006088.2chromosome1	70.97	913	182	12	296	1191	47541	46695	8e-131	473	1	S
s_1_1_contig71187	gi|118135635|ref|NC_006088.2chromosome1	78.34	3850	725	31	2792	6609	50040	53812	0	3142	5925	M
s_1_1_contig81271	gi|118135635|ref|NC_006088.2chromosome1	72.69	1278	267	34	1175	2410	66904	65667	0	652	2	S
s_1_1_contig116655	gi|118135635|ref|NC_006088.2chromosome1	82.91	117	19	1	2526	2642	71431	71546	1e-23	118	1694	M
s_1_1_contig113486	gi|118135635|ref|NC_006088.2chromosome1	87.94	141	17	0	366	506	75088	75228	8e-42	178	2	S
s_1_1_contig238165	gi|118135635|ref|NC_006088.2chromosome1	68.4	269	58	8	1346	1589	80377	80111	5e-16	92	42	M
s_1_1_contig203376	gi|118135635|ref|NC_006088.2chromosome1	68.31	243	49	7	547	771	80117	80349	1e-14	86	19	M
s_1_1_contig109528	gi|118135635|ref|NC_006088.2chromosome1	75.41	492	117	3	62	549	84518	84027	7e-88	333	681	M
s_1_1_contig240194	gi|118135635|ref|NC_006088.2chromosome1	77.42	93	21	0	536	628	86663	86571	1e-10	73	37	M
s_1_1_contig282253	gi|118135635|ref|NC_006088.2chromosome1	68.63	322	73	10	148	468	87676	87382	8e-21	105	32	M
s_1_1_contig144085	gi|118135635|ref|NC_006088.2chromosome1	70.29	1538	336	39	759	2242	97511	96041	0	646	2	S
s_1_1_contig45752	gi|118135635|ref|NC_006088.2chromosome1	77.12	236	38	7	1	227	99288	99060	8e-39	165	1	S
s_1_1_contig144060	gi|118135635|ref|NC_006088.2chromosome1	69.44	1757	338	49	4526	6177	101626	103288	0	706	2	S
s_1_1_contig222123	gi|118135635|ref|NC_006088.2chromosome1	81.82	132	24	0	208	339	105608	105477	5e-28	131	2	S
s_1_1_contig145395	gi|118135635|ref|NC_006088.2chromosome1	69.77	741	151	21	2319	3044	104927	105609	4e-78	298	1	S
s_1_1_contig223419	gi|118135635|ref|NC_006088.2chromosome1	66.39	1303	286	42	121	1382	104930	106121	9e-86	324	1	S
s_1_1_contig170415	gi|118135635|ref|NC_006088.2chromosome1	75.76	198	40	4	757	950	106646	106839	9e-28	131	1	S
s_1_1_contig226270	gi|118135635|ref|NC_006088.2chromosome1	71.35	1445	275	37	2249	3625	111275	112648	0	699	4	S
s_1_1_contig251528	gi|118135635|ref|NC_006088.2chromosome1	77.24	123	28	0	350	472	117695	117573	5e-18	97	111	M
s_1_1_contig190259	gi|118135635|ref|NC_006088.2chromosome1	90.7	43	4	0	766	808	119446	119488	4e-07	61	159	M
s_1_1_contig251589	gi|118135635|ref|NC_006088.2chromosome1	74.36	433	72	11	619	1040	119854	120258	7e-69	266	66	M
s_1_1_contig216852	gi|118135635|ref|NC_006088.2chromosome1	82.05	78	10	2	2067	2144	121675	121602	2e-10	73	188	M
s_1_1_contig221104	gi|118135635|ref|NC_006088.2chromosome1	87.76	49	5	1	2	49	121628	121676	3e-06	59	360	M
s_1_1_contig267301	gi|118135635|ref|NC_006088.2chromosome1	94.29	35	2	0	900	934	125302	125336	2e-05	55	1528	M
s_1_1_contig243470	gi|118135635|ref|NC_006088.2chromosome1	80.41	194	32	3	274	464	127977	128167	6e-40	170	1	S
s_1_1_contig241095	gi|118135635|ref|NC_006088.2chromosome1	71.43	224	50	4	117	334	140959	140744	4e-22	111	72	M
s_1_1_contig244312	gi|118135635|ref|NC_006088.2chromosome1	82.88	111	19	0	376	486	142595	142485	2e-23	114	98	M
s_1_1_contig182618	gi|118135635|ref|NC_006088.2chromosome1	80.95	105	17	2	124	225	146142	146246	3e-16	93	181	M
s_1_1_contig147418	gi|118135635|ref|NC_006088.2chromosome1	72.79	136	34	2	48	182	151183	151050	2e-10	73	649	M
s_1_1_contig235285	gi|118135635|ref|NC_006088.2chromosome1	73.63	201	40	4	401	588	152976	153176	4e-24	118	20932	M
s_1_1_contig186342	gi|118135635|ref|NC_006088.2chromosome1	73.26	288	62	3	332	619	155157	155429	1e-40	172	1	S
s_1_1_contig114557	gi|118135635|ref|NC_006088.2chromosome1	67.92	318	89	5	2309	2614	158167	158483	2e-19	104	19007	M
s_1_1_contig185675	gi|118135635|ref|NC_006088.2chromosome1	90	30	3	0	220	249	162045	162074	0.4	41	2	M
s_1_1_contig209641	gi|118135635|ref|NC_006088.2chromosome1	68.29	968	232	27	463	1383	165228	166167	6e-81	307	1	S
s_1_1_contig264060	gi|118135635|ref|NC_006088.2chromosome1	75.06	429	74	7	486	910	169410	169011	1e-75	289	1	S
s_1_1_contig75152	gi|118135635|ref|NC_006088.2chromosome1	74.69	561	96	13	4312	4854	172182	171650	1e-94	354	2	S
s_1_1_contig243056	gi|118135635|ref|NC_006088.2chromosome1	70.36	415	84	10	97	487	176746	177145	1e-44	185	1	S
s_1_1_contig10005	gi|118135635|ref|NC_006088.2chromosome1	70.3	330	77	9	309	627	184484	184165	2e-28	132	14243	M
s_1_1_contig244681	gi|118135635|ref|NC_006088.2chromosome1	95.56	45	1	1	1139	1182	187303	187347	1e-09	70	781	M
s_1_1_contig223152	gi|118135635|ref|NC_006088.2chromosome1	76.39	682	126	12	3382	4036	187651	188324	2e-133	482	2	S
s_1_1_contig91157	gi|118135635|ref|NC_006088.2chromosome1	65.56	1777	452	52	849	2531	189280	190990	2e-95	356	1	S
s_1_1_contig217135	gi|118135635|ref|NC_006088.2chromosome1	71.07	477	122	6	2259	2731	192780	192316	3e-56	226	1	S
s_1_1_contig189254	gi|118135635|ref|NC_006088.2chromosome1	80.35	173	34	0	1063	1235	198249	198421	1e-36	159	2	S
s_1_1_contig242278	gi|118135635|ref|NC_006088.2chromosome1	88.48	191	22	0	170	360	198238	198428	1e-62	246	1	S
s_1_1_contig208741	gi|118135635|ref|NC_006088.2chromosome1	75.38	130	32	0	369	498	199291	199162	2e-16	92	22	M
s_1_1_contig221365	gi|118135635|ref|NC_006088.2chromosome1	69.75	681	126	24	709	1327	202619	201957	1e-67	264	2	S
s_1_1_contig264614	gi|118135635|ref|NC_006088.2chromosome1	70.02	487	96	17	2425	2878	207314	207783	4e-45	188	2	S
s_1_1_contig233019	gi|118135635|ref|NC_006088.2chromosome1	75.58	430	91	5	1250	1667	209216	209643	8e-77	293	1	S
s_1_1_contig149731	gi|118135635|ref|NC_006088.2chromosome1	70.09	866	188	26	868	1715	213097	212285	2e-91	342	1	S
s_1_1_contig224435	gi|118135635|ref|NC_006088.2chromosome1	70.64	705	149	24	49	710	214053	214742	8e-74	282	1	S
s_1_1_contig103619	gi|118135635|ref|NC_006088.2chromosome1	73	763	158	23	586	1321	219902	220643	7e-105	387	1	S
s_1_1_contig195372	gi|118135635|ref|NC_006088.2chromosome1	66.94	856	227	17	3761	4588	223482	222655	5e-61	242	1	S
s_1_1_contig262449	gi|118135635|ref|NC_006088.2chromosome1	79	200	34	4	485	677	227273	227471	2e-37	161	61	M
s_1_1_contig223770	gi|118135635|ref|NC_006088.2chromosome1	66.67	507	130	12	1772	2258	229857	229370	1e-28	134	1	S
s_1_1_contig233423	gi|118135635|ref|NC_006088.2chromosome1	100	23	0	0	618	640	234972	234950	0.2	43	48	M
s_1_1_contig36302	gi|118135635|ref|NC_006088.2chromosome1	87.12	132	15	1	470	599	235680	235811	4e-37	159	1	S
s_1_1_contig261833	gi|118135635|ref|NC_006088.2chromosome1	85.23	88	13	0	1	88	235952	236039	1e-18	100	6697	M
s_1_1_contig212803	gi|118135635|ref|NC_006088.2chromosome1	88.24	34	4	0	107	140	238381	238348	0.023	45	41	M
s_1_1_contig213610	gi|118135635|ref|NC_006088.2chromosome1	88.57	35	4	0	83	117	238382	238348	0.006	46	141	M
s_1_1_contig143213	gi|118135635|ref|NC_006088.2chromosome1	72.05	526	131	10	4685	5200	239545	239026	7e-65	255	1	S
s_1_1_contig109743	gi|118135635|ref|NC_006088.2chromosome1	70.19	1117	263	22	1776	2857	247575	248656	7e-132	477	2	S
s_1_1_contig121785	gi|118135635|ref|NC_006088.2chromosome1	66.99	721	166	18	1241	1938	250002	250673	4e-52	212	1	S
s_1_1_contig235248	gi|118135635|ref|NC_006088.2chromosome1	81.54	65	12	0	656	720	250684	250748	3e-08	64	15	M
s_1_1_contig220290	gi|118135635|ref|NC_006088.2chromosome1	71.36	433	79	15	922	1329	253205	253617	3e-47	196	1	S
s_1_1_contig219844	gi|118135635|ref|NC_006088.2chromosome1	68.11	1107	269	29	870	1924	258611	257537	9e-94	351	1	S
s_1_1_contig104501	gi|118135635|ref|NC_006088.2chromosome1	77.46	346	68	3	2820	3156	264009	264353	7e-69	268	1	S
s_1_1_contig16129	gi|118135635|ref|NC_006088.2chromosome1	73.51	151	39	1	873	1022	265238	265088	2e-15	90	68	M
s_1_1_contig263581	gi|118135635|ref|NC_006088.2chromosome1	79.58	240	25	9	21	236	267687	267926	9e-47	194	1	S
s_1_1_contig146518	gi|118135635|ref|NC_006088.2chromosome1	72.68	421	99	9	1092	1510	270224	269818	2e-53	215	1	S
s_1_1_contig46293	gi|118135635|ref|NC_006088.2chromosome1	100	26	0	0	1	26	270475	270450	0.002	48	92	M
s_1_1_contig146705	gi|118135635|ref|NC_006088.2chromosome1	71.88	448	87	12	3575	4005	275112	275537	1e-54	221	1	S
s_1_1_contig196415	gi|118135635|ref|NC_006088.2chromosome1	76.96	395	64	7	506	900	277674	278041	3e-77	295	1	S
s_1_1_contig240775	gi|118135635|ref|NC_006088.2chromosome1	83.77	191	31	0	727	917	280319	280129	4e-50	205	97	M
s_1_1_contig225878	gi|118135635|ref|NC_006088.2chromosome1	73.82	317	69	6	1775	2080	281255	280942	1e-43	183	11	M
s_1_1_contig246709	gi|118135635|ref|NC_006088.2chromosome1	72.66	267	65	5	373	634	290576	290839	2e-30	138	1	S
s_1_1_contig222350	gi|118135635|ref|NC_006088.2chromosome1	74.81	262	58	6	1357	1617	292149	292403	4e-35	156	1	S
s_1_1_contig220114	gi|118135635|ref|NC_006088.2chromosome1	84.24	311	34	4	254	549	299318	299008	8e-90	336	1	S
s_1_1_contig227701	gi|118135635|ref|NC_006088.2chromosome1	72.64	296	69	9	2922	3210	300494	300784	3e-30	140	1	S
s_1_1_contig159065	gi|118135635|ref|NC_006088.2chromosome1	70.37	540	130	13	3243	3777	305932	306446	2e-54	221	1	S
s_1_1_contig154807	gi|118135635|ref|NC_006088.2chromosome1	87.13	171	19	2	944	1113	309841	310009	2e-49	203	2	S
s_1_1_contig145775	gi|118135635|ref|NC_006088.2chromosome1	71.21	712	159	17	931	1617	310796	311486	5e-86	325	1	S
s_1_1_contig261048	gi|118135635|ref|NC_006088.2chromosome1	65.76	1066	280	35	72	1089	314678	315706	1e-47	196	1	S
s_1_1_contig216675	gi|118135635|ref|NC_006088.2chromosome1	100	27	0	0	890	916	317350	317324	0.0008	50	3188	M
s_1_1_contig79282	gi|118135635|ref|NC_006088.2chromosome1	70.37	908	169	28	716	1588	324386	325228	7e-106	390	1	S
s_1_1_contig125848	gi|118135635|ref|NC_006088.2chromosome1	73.14	484	91	14	2074	2523	328252	327774	4e-66	259	1	S
s_1_1_contig173491	gi|118135635|ref|NC_006088.2chromosome1	92.59	27	2	0	574	600	330281	330255	0.48	41	30	M
s_1_1_contig216256	gi|118135635|ref|NC_006088.2chromosome1	72.62	1041	207	32	3072	4061	332542	331529	3e-144	518	2	S
s_1_1_contig9169	gi|118135635|ref|NC_006088.2chromosome1	79.2	125	14	5	1	114	335619	335496	9e-18	97	8801	M
s_1_1_contig158565	gi|118135635|ref|NC_006088.2chromosome1	74.07	513	113	6	1831	2337	341214	340716	3e-83	316	3	S
s_1_1_contig83102	gi|118135635|ref|NC_006088.2chromosome1	79.63	324	54	7	2955	3268	345311	344990	3e-68	266	1	S
s_1_1_contig217320	gi|118135635|ref|NC_006088.2chromosome1	77.38	252	48	5	946	1191	352135	352383	2e-43	183	2	S
s_1_1_contig45454	gi|118135635|ref|NC_006088.2chromosome1	100	20	0	0	467	486	360597	360616	3.4	37	2	M
s_1_1_contig108214	gi|118135635|ref|NC_006088.2chromosome1	82.22	270	42	3	6972	7238	362168	361902	6e-67	262	1	S
s_1_1_contig40823	gi|118135635|ref|NC_006088.2chromosome1	68.94	425	87	15	114	528	363754	364143	2e-32	145	2	S
s_1_1_contig175737	gi|118135635|ref|NC_006088.2chromosome1	67.39	322	62	19	496	808	363907	364194	7e-07	61	41	M
s_1_1_contig146151	gi|118135635|ref|NC_006088.2chromosome1	84.91	371	44	2	3493	3851	374509	374139	2e-114	419	1	S
s_1_1_contig147641	gi|118135635|ref|NC_006088.2chromosome1	77.78	207	35	4	681	880	380891	380689	6e-36	158	1	S
s_1_1_contig264334	gi|118135635|ref|NC_006088.2chromosome1	89.38	160	16	1	772	931	382745	382903	2e-51	208	1	S
s_1_1_contig149357	gi|118135635|ref|NC_006088.2chromosome1	91.92	99	8	0	1674	1772	384345	384443	3e-31	143	1	S
s_1_1_contig66410	gi|118135635|ref|NC_006088.2chromosome1	72.7	282	46	8	1962	2217	385292	385016	4e-34	154	8	M
s_1_1_contig3004	gi|118135635|ref|NC_006088.2chromosome1	92.86	28	2	0	139	166	396845	396818	0.064	43	69	M
s_1_1_contig13550	gi|118135635|ref|NC_006088.2chromosome1	83.65	416	49	7	894	1298	396887	397294	3e-118	430	1	S
s_1_1_contig161536	gi|118135635|ref|NC_006088.2chromosome1	87.73	163	18	2	465	627	397766	397926	1e-47	197	1	S
s_1_1_contig217067	gi|118135635|ref|NC_006088.2chromosome1	72.2	295	59	10	3920	4193	403191	403483	1e-29	138	3345	M
s_1_1_contig197792	gi|118135635|ref|NC_006088.2chromosome1	87.88	66	8	0	211	276	406270	406205	2e-14	84	223	M
s_1_1_contig227483	gi|118135635|ref|NC_006088.2chromosome1	89.38	113	12	0	236	348	407633	407521	3e-34	150	1	S
s_1_1_contig164323	gi|118135635|ref|NC_006088.2chromosome1	85.53	235	34	0	2368	2602	411510	411744	4e-70	271	1	S
s_1_1_contig36176	gi|118135635|ref|NC_006088.2chromosome1	86.85	213	28	0	1110	1322	412039	411827	2e-66	259	2	S
s_1_1_contig38686	gi|118135635|ref|NC_006088.2chromosome1	79.63	54	11	0	541	594	428917	428864	0.002	48	45	M
s_1_1_contig228707	gi|118135635|ref|NC_006088.2chromosome1	77.6	442	62	11	2815	3237	434965	434542	5e-89	334	1	S
s_1_1_contig33160	gi|118135635|ref|NC_006088.2chromosome1	89.19	37	4	0	413	449	440097	440133	0.001	50	65	M
s_1_1_contig247343	gi|118135635|ref|NC_006088.2chromosome1	84.86	185	23	4	398	578	440270	440453	2e-47	194	2	S
s_1_1_contig169978	gi|118135635|ref|NC_006088.2chromosome1	84.91	159	24	0	1449	1607	441033	440875	1e-42	179	1	S
s_1_1_contig244242	gi|118135635|ref|NC_006088.2chromosome1	87.04	108	11	2	392	499	444016	443912	8e-27	125	1	S
s_1_1_contig242887	gi|118135635|ref|NC_006088.2chromosome1	87.59	145	17	1	1019	1162	444477	444333	3e-42	178	1	S
s_1_1_contig146867	gi|118135635|ref|NC_006088.2chromosome1	87.97	266	32	0	1090	1355	446395	446130	1e-89	336	3	S
s_1_1_contig233739	gi|118135635|ref|NC_006088.2chromosome1	82.29	638	79	10	519	1124	449053	448418	3e-177	627	1	S
s_1_1_contig218170	gi|118135635|ref|NC_006088.2chromosome1	78.28	847	113	16	594	1424	450083	449292	0	690	2	S
s_1_1_contig219488	gi|118135635|ref|NC_006088.2chromosome1	88.66	247	25	1	1721	1967	455554	455311	6e-84	318	4	S
s_1_1_contig142880	gi|118135635|ref|NC_006088.2chromosome1	81.03	58	8	1	16	73	456948	457002	0.0001	54	20	M
s_1_1_contig205648	gi|118135635|ref|NC_006088.2chromosome1	87.13	202	23	1	198	396	458329	458128	9e-63	246	1	S
s_1_1_contig249877	gi|118135635|ref|NC_006088.2chromosome1	77.73	229	10	1	190	377	458619	458847	5e-54	215	2	S
s_1_1_contig180526	gi|118135635|ref|NC_006088.2chromosome1	89.38	113	10	1	2083	2195	467618	467508	1e-32	147	1	S
s_1_1_contig206649	gi|118135635|ref|NC_006088.2chromosome1	87.61	113	12	1	655	767	467508	467618	3e-30	138	1	S
s_1_1_contig4173	gi|118135635|ref|NC_006088.2chromosome1	73.29	322	59	20	977	1286	473421	473115	6e-27	127	1	S
s_1_1_contig43580	gi|118135635|ref|NC_006088.2chromosome1	96.67	30	1	0	278	307	473255	473226	0.0004	50	130	M
s_1_1_contig146235	gi|118135635|ref|NC_006088.2chromosome1	69.3	531	94	32	295	793	473002	473495	3e-31	141	1	S
s_1_1_contig125752	gi|118135635|ref|NC_006088.2chromosome1	69.11	191	36	9	398	584	473557	473728	3e-06	59	24	M
s_1_1_contig248792	gi|118135635|ref|NC_006088.2chromosome1	85.59	118	14	1	26	140	473859	473742	1e-29	134	1	S
s_1_1_contig125702	gi|118135635|ref|NC_006088.2chromosome1	79.7	1675	285	15	2097	3727	478536	476873	0	1471	2	S
s_1_1_contig98880	gi|118135635|ref|NC_006088.2chromosome1	71.11	1066	194	29	82	1065	482135	481102	3e-140	506	1	S
s_1_1_contig221975	gi|118135635|ref|NC_006088.2chromosome1	80.65	589	99	8	100	682	482248	482827	3e-147	526	1	S
s_1_1_contig96188	gi|118135635|ref|NC_006088.2chromosome1	69.97	1828	377	51	1529	3293	489157	487439	0	747	5	S
s_1_1_contig251902	gi|118135635|ref|NC_006088.2chromosome1	76.93	646	116	13	49	664	491483	490841	9e-129	464	1	S
s_1_1_contig217745	gi|118135635|ref|NC_006088.2chromosome1	75.11	699	125	15	213	868	492607	493299	9e-125	453	2	S
s_1_1_contig189643	gi|118135635|ref|NC_006088.2chromosome1	71.74	591	125	13	1158	1723	502704	502131	1e-76	293	1	S
s_1_1_contig226067	gi|118135635|ref|NC_006088.2chromosome1	78.99	714	96	10	178	871	504625	503946	4e-174	616	1	S
s_1_1_contig148086	gi|118135635|ref|NC_006088.2chromosome1	77.84	528	73	13	691	1207	506908	507402	4e-111	407	2	S
s_1_1_contig34312	gi|118135635|ref|NC_006088.2chromosome1	74.12	371	42	9	176	543	507426	507745	4e-62	244	1	S
s_1_1_contig92457	gi|118135635|ref|NC_006088.2chromosome1	70.33	418	86	9	5128	5538	514258	514644	8e-45	188	1	S
s_1_1_contig269018	gi|118135635|ref|NC_006088.2chromosome1	79.89	179	33	2	875	1052	516705	516529	5e-35	154	1	S
s_1_1_contig146908	gi|118135635|ref|NC_006088.2chromosome1	72.81	581	103	18	2639	3209	527734	528269	1e-79	304	38	M
s_1_1_contig277075	gi|118135635|ref|NC_006088.2chromosome1	77.78	333	59	10	21	341	529196	529525	5e-60	235	1	S
s_1_1_contig136998	gi|118135635|ref|NC_006088.2chromosome1	71.16	378	87	9	2354	2711	533567	533192	1e-39	170	1	S
s_1_1_contig241052	gi|118135635|ref|NC_006088.2chromosome1	76.61	295	58	5	105	395	537897	538184	9e-52	208	1	S
s_1_1_contig168316	gi|118135635|ref|NC_006088.2chromosome1	87.22	352	39	3	1517	1866	541864	541517	2e-116	425	1	S
s_1_1_contig234935	gi|118135635|ref|NC_006088.2chromosome1	73.02	252	52	8	621	863	543173	543417	4e-27	127	2050	M
s_1_1_contig229369	gi|118135635|ref|NC_006088.2chromosome1	82.73	249	34	2	544	792	545980	545741	2e-65	255	1	S
s_1_1_contig218378	gi|118135635|ref|NC_006088.2chromosome1	71.4	895	177	22	269	1133	547131	547976	1e-118	432	1	S
s_1_1_contig208658	gi|118135635|ref|NC_006088.2chromosome1	86.11	216	26	3	1232	1446	553665	553453	1e-61	244	14	M
s_1_1_contig182374	gi|118135635|ref|NC_006088.2chromosome1	67.75	772	162	17	139	877	556144	556861	2e-70	271	1	S
s_1_1_contig218848	gi|118135635|ref|NC_006088.2chromosome1	78.04	419	77	7	1100	1512	557978	557569	4e-86	324	1	S
s_1_1_contig213410	gi|118135635|ref|NC_006088.2chromosome1	89.23	65	7	0	462	526	558456	558520	6e-15	86	9770	M
s_1_1_contig84202	gi|118135635|ref|NC_006088.2chromosome1	70.03	664	152	19	2173	2822	559526	560156	1e-65	257	2	S
s_1_1_contig262281	gi|118135635|ref|NC_006088.2chromosome1	72.71	634	137	15	683	1292	561144	561765	2e-87	329	18	M
s_1_1_contig186132	gi|118135635|ref|NC_006088.2chromosome1	78.34	374	73	4	122	488	565091	564719	2e-78	298	2	S
s_1_1_contig217364	gi|118135635|ref|NC_006088.2chromosome1	70.33	691	167	17	1570	2239	566372	565699	1e-72	280	2	S
s_1_1_contig157859	gi|118135635|ref|NC_006088.2chromosome1	72.8	658	138	22	3382	4025	570998	570368	5e-84	318	341	M
s_1_1_contig185226	gi|118135635|ref|NC_006088.2chromosome1	73.22	1307	238	35	81	1320	577093	578354	0	722	1	S
s_1_1_contig71290	gi|118135635|ref|NC_006088.2chromosome1	78.13	1326	175	34	105	1370	577093	578363	0	1034	2	S
s_1_1_contig245552	gi|118135635|ref|NC_006088.2chromosome1	79.73	74	11	4	729	800	581994	581923	0.0002	52	497	M
s_1_1_contig46766	gi|118135635|ref|NC_006088.2chromosome1	68.15	157	44	2	120	273	581968	582121	1e-05	55	25	M
s_1_1_contig169922	gi|118135635|ref|NC_006088.2chromosome1	89.19	37	4	0	427	463	582189	582153	0.001	50	35	M
s_1_1_contig275291	gi|118135635|ref|NC_006088.2chromosome1	89.13	46	4	1	879	924	582791	582747	7e-06	57	73	M
s_1_1_contig264429	gi|118135635|ref|NC_006088.2chromosome1	78.43	51	11	0	1302	1352	582756	582806	0.25	43	11	M
s_1_1_contig53259	gi|118135635|ref|NC_006088.2chromosome1	91.89	37	1	1	717	751	582939	582975	0.0002	52	40	M
s_1_1_contig220565	gi|118135635|ref|NC_006088.2chromosome1	82.4	676	94	6	1258	1928	587884	587229	0	679	5	S
s_1_1_contig88720	gi|118135635|ref|NC_006088.2chromosome1	88.1	168	19	1	90	257	590065	590231	1e-51	210	1	S
s_1_1_contig189770	gi|118135635|ref|NC_006088.2chromosome1	67.64	343	99	2	1831	2172	590734	590403	2e-24	120	62	M
s_1_1_contig5274	gi|118135635|ref|NC_006088.2chromosome1	94.59	37	2	0	1	37	593281	593245	5e-06	59	117	M
s_1_1_contig189941	gi|118135635|ref|NC_006088.2chromosome1	73.54	257	39	9	1816	2064	598843	599078	1e-31	143	2	S
s_1_1_contig265069	gi|118135635|ref|NC_006088.2chromosome1	71.86	167	28	6	1	161	599527	599374	5e-13	81	54	M
s_1_1_contig242683	gi|118135635|ref|NC_006088.2chromosome1	72.18	399	69	14	424	802	599762	600138	4e-47	194	1	S
s_1_1_contig232791	gi|118135635|ref|NC_006088.2chromosome1	80.53	113	20	1	1050	1160	601041	601153	3e-19	102	1350	M
s_1_1_contig119871	gi|118135635|ref|NC_006088.2chromosome1	86.49	37	5	0	1	37	619142	619106	0.069	45	43	M
s_1_1_contig225696	gi|118135635|ref|NC_006088.2chromosome1	79.04	167	31	3	1560	1725	619809	619646	5e-29	134	1	S
s_1_1_contig35850	gi|118135635|ref|NC_006088.2chromosome1	69.85	199	40	8	33	218	621239	621048	2e-10	72	40	M
s_1_1_contig226099	gi|118135635|ref|NC_006088.2chromosome1	87.01	154	18	2	1165	1317	622582	622734	6e-43	181	2	M
s_1_1_contig203927	gi|118135635|ref|NC_006088.2chromosome1	94.19	172	9	1	768	939	625549	625379	2e-67	262	1	S
s_1_1_contig118771	gi|118135635|ref|NC_006088.2chromosome1	81.41	199	35	2	2613	2810	627149	626952	6e-44	185	1257	M
s_1_1_contig99875	gi|118135635|ref|NC_006088.2chromosome1	77.61	259	48	5	527	781	629068	628816	5e-46	192	3	M
s_1_1_contig164544	gi|118135635|ref|NC_006088.2chromosome1	72.12	330	50	8	109	419	633845	633539	2e-43	183	4	M
s_1_1_contig158245	gi|118135635|ref|NC_006088.2chromosome1	84.3	242	33	3	657	898	634638	634874	1e-65	257	1	S
s_1_1_contig225625	gi|118135635|ref|NC_006088.2chromosome1	75.44	338	54	12	2440	2772	637017	636704	5e-51	208	1	S
s_1_1_contig278352	gi|118135635|ref|NC_006088.2chromosome1	90.32	31	3	0	597	627	637756	637786	0.083	43	9	M
s_1_1_contig262725	gi|118135635|ref|NC_006088.2chromosome1	75.27	279	50	6	151	429	641343	641084	3e-43	183	4	S
s_1_1_contig118608	gi|118135635|ref|NC_006088.2chromosome1	75.66	304	52	5	1413	1715	642783	643065	3e-52	212	2	S
s_1_1_contig37811	gi|118135635|ref|NC_006088.2chromosome1	88.89	45	5	0	535	579	643951	643907	1e-06	59	32	M
s_1_1_contig228071	gi|118135635|ref|NC_006088.2chromosome1	95.12	123	5	1	1316	1437	645656	645778	2e-46	192	1	S
s_1_1_contig219467	gi|118135635|ref|NC_006088.2chromosome1	86.73	211	28	0	2391	2601	646211	646001	3e-65	255	1	S
s_1_1_contig265107	gi|118135635|ref|NC_006088.2chromosome1	85.77	274	38	1	185	457	645942	646215	4e-83	315	1	S
s_1_1_contig225895	gi|118135635|ref|NC_006088.2chromosome1	86.38	301	41	0	94	394	647218	647518	3e-96	358	1	S
s_1_1_contig221132	gi|118135635|ref|NC_006088.2chromosome1	71.32	401	92	12	1717	2098	651076	650680	3e-40	172	1	S
s_1_1_contig281970	gi|118135635|ref|NC_006088.2chromosome1	70.67	150	22	6	581	725	655690	655822	9e-09	66	29	M
s_1_1_contig185005	gi|118135635|ref|NC_006088.2chromosome1	71.43	126	21	6	32	156	655806	655917	0.0002	52	25	M
s_1_1_contig148510	gi|118135635|ref|NC_006088.2chromosome1	67.56	225	46	11	1687	1903	655763	655968	0.0005	52	26	M
s_1_1_contig221447	gi|118135635|ref|NC_006088.2chromosome1	70.88	1322	247	31	2666	3904	657837	659103	5e-179	634	2	S
s_1_1_contig281888	gi|118135635|ref|NC_006088.2chromosome1	67.59	503	130	15	256	730	659426	659923	2e-29	134	10061	M
s_1_1_contig198647	gi|118135635|ref|NC_006088.2chromosome1	70.42	311	65	5	388	672	660941	661250	1e-33	149	1	S
s_1_1_contig164405	gi|118135635|ref|NC_006088.2chromosome1	72.81	629	112	17	2094	2682	663235	663844	1e-90	340	1	S
s_1_1_contig225344	gi|118135635|ref|NC_006088.2chromosome1	66.15	771	172	25	97	812	665933	665197	4e-43	181	1	S
s_1_1_contig234184	gi|118135635|ref|NC_006088.2chromosome1	67.58	728	151	18	129	833	666024	666689	3e-62	244	1	S
s_1_1_contig182339	gi|118135635|ref|NC_006088.2chromosome1	72.53	233	58	4	683	915	671636	671410	2e-24	120	9666	M
s_1_1_contig220385	gi|118135635|ref|NC_006088.2chromosome1	70.06	314	64	9	1615	1925	675206	675492	4e-27	129	20597	M
s_1_1_contig230562	gi|118135635|ref|NC_006088.2chromosome1	75.27	275	42	3	97	361	676777	676519	1e-48	199	1	S
s_1_1_contig226905	gi|118135635|ref|NC_006088.2chromosome1	83.7	92	10	1	104	195	676921	677007	3e-18	99	8884	M
s_1_1_contig225391	gi|118135635|ref|NC_006088.2chromosome1	70.29	552	126	9	647	1186	677665	678190	6e-64	250	1	S
s_1_1_contig145637	gi|118135635|ref|NC_006088.2chromosome1	86.13	274	33	3	101	374	681866	681598	2e-83	315	1	S
s_1_1_contig277874	gi|118135635|ref|NC_006088.2chromosome1	90	30	3	0	408	437	683078	683107	0.29	41	10	M
s_1_1_contig222491	gi|118135635|ref|NC_006088.2chromosome1	87.89	190	22	1	2031	2220	683932	684120	3e-59	235	1	S
s_1_1_contig223442	gi|118135635|ref|NC_006088.2chromosome1	70.52	2463	491	71	66	2419	684870	687206	0	1061	1	S
s_1_1_contig222766	gi|118135635|ref|NC_006088.2chromosome1	69.67	511	82	18	84	587	690935	690491	6e-51	208	1	S
s_1_1_contig202312	gi|118135635|ref|NC_006088.2chromosome1	79.78	371	42	8	1554	1922	691495	691834	2e-86	325	1	S
s_1_1_contig226974	gi|118135635|ref|NC_006088.2chromosome1	91.55	213	18	0	127	339	692351	692563	6e-80	304	1	S
s_1_1_contig265834	gi|118135635|ref|NC_006088.2chromosome1	86.49	148	19	1	806	952	693701	693554	4e-41	174	1	S
s_1_1_contig215168	gi|118135635|ref|NC_006088.2chromosome1	75.17	584	95	13	2283	2846	695179	695732	1e-104	387	1	S
s_1_1_contig30683	gi|118135635|ref|NC_006088.2chromosome1	71.69	166	47	0	763	928	696900	697065	4e-15	88	142	M
s_1_1_contig244099	gi|118135635|ref|NC_006088.2chromosome1	83.78	148	22	1	401	546	697712	697859	9e-36	156	1	S
s_1_1_contig100974	gi|118135635|ref|NC_006088.2chromosome1	69.07	1332	278	41	1469	2784	699717	700930	1e-132	480	2	S
s_1_1_contig70987	gi|118135635|ref|NC_006088.2chromosome1	72.86	818	152	24	380	1178	703266	704032	1e-117	430	2	S
s_1_1_contig44478	gi|118135635|ref|NC_006088.2chromosome1	96.43	28	1	0	164	191	706471	706498	0.008	46	63	M
s_1_1_contig242484	gi|118135635|ref|NC_006088.2chromosome1	74.83	433	67	9	319	743	706893	707291	2e-75	288	1	S
s_1_1_contig159152	gi|118135635|ref|NC_006088.2chromosome1	73.3	693	130	10	4935	5625	708388	707749	9e-115	421	1	S
s_1_1_contig122001	gi|118135635|ref|NC_006088.2chromosome1	90.68	354	27	1	1503	1850	713416	713769	3e-136	491	1	S
s_1_1_contig282873	gi|118135635|ref|NC_006088.2chromosome1	87.62	202	22	2	128	327	715850	715650	3e-63	246	1	S
s_1_1_contig169079	gi|118135635|ref|NC_006088.2chromosome1	81.01	79	8	3	305	383	716235	716306	5e-09	68	71	M
s_1_1_contig148624	gi|118135635|ref|NC_006088.2chromosome1	76.16	172	24	4	751	907	721154	721323	1e-25	123	36	M
s_1_1_contig39288	gi|118135635|ref|NC_006088.2chromosome1	85.77	527	53	10	19	529	722760	723280	8e-166	587	1	S
s_1_1_contig78576	gi|118135635|ref|NC_006088.2chromosome1	87.74	954	76	23	993	1931	724749	725676	0	1126	3	S
s_1_1_contig218567	gi|118135635|ref|NC_006088.2chromosome1	75.19	387	44	7	129	488	730493	730132	5e-73	280	2	S
s_1_1_contig85070	gi|118135635|ref|NC_006088.2chromosome1	68.46	1040	205	20	1672	2636	732232	731241	9e-114	417	2	S
s_1_1_contig84592	gi|118135635|ref|NC_006088.2chromosome1	67.89	981	203	33	251	1209	735243	734353	2e-79	302	1	S
s_1_1_contig239318	gi|118135635|ref|NC_006088.2chromosome1	69.79	470	113	8	379	825	735267	735730	3e-48	197	1	S
s_1_1_contig15690	gi|118135635|ref|NC_006088.2chromosome1	93.1	29	2	0	388	416	738339	738367	0.024	45	22	M
s_1_1_contig220406	gi|118135635|ref|NC_006088.2chromosome1	69.08	1785	355	54	292	2010	736949	738602	0	664	2	S
s_1_1_contig76780	gi|118135635|ref|NC_006088.2chromosome1	69.64	1199	233	35	1193	2333	740396	741521	4e-133	482	6	S
s_1_1_contig91707	gi|118135635|ref|NC_006088.2chromosome1	67.93	736	134	24	149	833	753637	752953	1e-62	248	6	M
s_1_1_contig215847	gi|118135635|ref|NC_006088.2chromosome1	71.63	779	162	18	565	1316	754549	753803	2e-103	381	1	S
s_1_1_contig92985	gi|118135635|ref|NC_006088.2chromosome1	68.02	1085	212	32	1964	2993	765710	764706	2e-99	370	1	S
s_1_1_contig241024	gi|118135635|ref|NC_006088.2chromosome1	65.6	532	112	18	212	710	767722	768215	2e-24	118	11416	M
s_1_1_contig145107	gi|118135635|ref|NC_006088.2chromosome1	71.58	651	106	17	967	1610	769156	768578	3e-89	334	1	S
s_1_1_contig197075	gi|118135635|ref|NC_006088.2chromosome1	76.38	326	55	6	402	712	770548	770866	5e-59	233	1	S
s_1_1_contig116803	gi|118135635|ref|NC_006088.2chromosome1	69.48	924	144	27	1156	1966	773621	772723	5e-108	398	1	S
s_1_1_contig229098	gi|118135635|ref|NC_006088.2chromosome1	86.63	187	25	0	624	810	774478	774292	2e-56	224	2	S
s_1_1_contig207474	gi|118135635|ref|NC_006088.2chromosome1	90.32	31	3	0	597	627	776634	776664	0.085	43	23	M
s_1_1_contig227251	gi|118135635|ref|NC_006088.2chromosome1	71.91	299	70	2	115	406	783054	782763	2e-38	165	3	M
s_1_1_contig196566	gi|118135635|ref|NC_006088.2chromosome1	68.16	446	116	11	660	1096	783300	783728	3e-30	138	2289	M
s_1_1_contig203843	gi|118135635|ref|NC_006088.2chromosome1	79.03	1011	157	12	2108	3084	785411	784422	0	863	2	S
s_1_1_contig266544	gi|118135635|ref|NC_006088.2chromosome1	81.05	248	42	3	1255	1499	787860	788105	9e-57	226	1	S
s_1_1_contig84573	gi|118135635|ref|NC_006088.2chromosome1	73.83	963	177	21	4990	5921	790534	789616	7e-161	574	2	S
s_1_1_contig241865	gi|118135635|ref|NC_006088.2chromosome1	72.55	1712	282	40	229	1871	794994	796586	0	958	1	S
s_1_1_contig200826	gi|118135635|ref|NC_006088.2chromosome1	73.74	377	70	9	1268	1633	798911	798553	2e-54	219	2	S
s_1_1_contig155182	gi|118135635|ref|NC_006088.2chromosome1	80.85	141	20	2	1407	1547	804607	804740	9e-28	131	2	S
s_1_1_contig277076	gi|118135635|ref|NC_006088.2chromosome1	88.41	138	16	0	68	205	805252	805389	2e-42	178	79	M
s_1_1_contig245749	gi|118135635|ref|NC_006088.2chromosome1	70.26	427	80	10	569	987	806429	806816	1e-47	196	1	S
s_1_1_contig264960	gi|118135635|ref|NC_006088.2chromosome1	72.83	703	100	25	2427	3047	810679	809986	3e-101	376	4	S
s_1_1_contig276179	gi|118135635|ref|NC_006088.2chromosome1	69.38	663	153	16	23	662	812662	813297	3e-65	253	1	S
s_1_1_contig235514	gi|118135635|ref|NC_006088.2chromosome1	74.68	316	61	7	836	1135	817604	817916	2e-47	196	4	M
s_1_1_contig275670	gi|118135635|ref|NC_006088.2chromosome1	74.41	383	73	11	24	390	819087	818714	5e-56	223	1	S
s_1_1_contig131064	gi|118135635|ref|NC_006088.2chromosome1	71.95	1262	284	32	2200	3435	822279	821062	1e-168	600	3	S
s_1_1_contig15588	gi|118135635|ref|NC_006088.2chromosome1	71.6	338	64	9	57	374	824766	824441	2e-38	165	1	S
s_1_1_contig183486	gi|118135635|ref|NC_006088.2chromosome1	69.92	831	164	20	47	823	825673	824875	3e-97	360	1	S
s_1_1_contig226200	gi|118135635|ref|NC_006088.2chromosome1	76.21	559	95	11	459	1004	825686	826219	2e-107	394	1	S
s_1_1_contig216603	gi|118135635|ref|NC_006088.2chromosome1	78.88	535	96	8	1289	1818	826953	826431	1e-119	435	2	S
s_1_1_contig238879	gi|118135635|ref|NC_006088.2chromosome1	82.95	129	17	5	529	654	828041	828167	1e-23	116	217	M
s_1_1_contig184927	gi|118135635|ref|NC_006088.2chromosome1	82.91	117	16	2	1240	1356	829385	829497	1e-23	116	619	M
s_1_1_contig241839	gi|118135635|ref|NC_006088.2chromosome1	81.13	159	29	1	1045	1203	830797	830954	2e-33	149	1	S
s_1_1_contig247086	gi|118135635|ref|NC_006088.2chromosome1	80.2	202	33	1	9	203	831268	831469	4e-45	187	1	S
s_1_1_contig223219	gi|118135635|ref|NC_006088.2chromosome1	74.64	489	97	6	135	623	832827	833288	5e-85	320	2	S
s_1_1_contig35770	gi|118135635|ref|NC_006088.2chromosome1	68.66	217	52	7	323	531	834827	835035	2e-09	68	37	M
s_1_1_contig84419	gi|118135635|ref|NC_006088.2chromosome1	70.07	1263	263	29	7857	9052	841954	843168	2e-152	547	6	S
s_1_1_contig72019	gi|118135635|ref|NC_006088.2chromosome1	69.7	759	174	19	2213	2953	846546	845826	2e-77	297	1	S
s_1_1_contig124535	gi|118135635|ref|NC_006088.2chromosome1	80.62	650	89	13	4222	4855	854182	854810	2e-162	580	4	M
s_1_1_contig215400	gi|118135635|ref|NC_006088.2chromosome1	87.88	231	28	0	166	396	857672	857442	1e-76	291	1	S
s_1_1_contig246155	gi|118135635|ref|NC_006088.2chromosome1	80.68	440	65	5	46	482	857828	858250	2e-111	407	1	S
s_1_1_contig159402	gi|118135635|ref|NC_006088.2chromosome1	70.69	1218	253	30	850	1984	860189	858993	1e-152	545	1	S
s_1_1_contig184961	gi|118135635|ref|NC_006088.2chromosome1	71.89	1213	206	27	304	1454	860984	862123	0	650	4	M
s_1_1_contig121151	gi|118135635|ref|NC_006088.2chromosome1	68.72	1448	273	42	1376	2761	864272	862943	2e-151	542	2	S
s_1_1_contig129397	gi|118135635|ref|NC_006088.2chromosome1	71.93	937	194	18	2582	3478	867495	866588	2e-134	486	1	S
s_1_1_contig221704	gi|118135635|ref|NC_006088.2chromosome1	78.51	121	25	1	52	171	869030	869150	6e-18	99	12059	M
s_1_1_contig205705	gi|118135635|ref|NC_006088.2chromosome1	74.46	325	56	5	396	707	870917	870607	4e-53	214	1	S
s_1_1_contig216821	gi|118135635|ref|NC_006088.2chromosome1	81.67	60	10	1	1670	1728	872639	872580	4e-05	55	38	M
s_1_1_contig207997	gi|118135635|ref|NC_006088.2chromosome1	82.93	41	7	0	531	571	886671	886711	0.076	43	4	M
s_1_1_contig212134	gi|118135635|ref|NC_006088.2chromosome1	74.69	399	80	9	1379	1773	887180	887561	1e-61	242	1	S
s_1_1_contig96988	gi|118135635|ref|NC_006088.2chromosome1	75.32	154	38	0	1891	2044	891732	891885	9e-21	107	8925	M
s_1_1_contig146367	gi|118135635|ref|NC_006088.2chromosome1	65.13	519	91	18	212	663	893275	892780	8e-25	120	60	M
s_1_1_contig170081	gi|118135635|ref|NC_006088.2chromosome1	73.72	468	101	9	1366	1829	897216	897665	1e-69	269	1	S
s_1_1_contig228845	gi|118135635|ref|NC_006088.2chromosome1	74.73	364	74	6	1880	2241	900504	900851	3e-58	232	1	S
s_1_1_contig243581	gi|118135635|ref|NC_006088.2chromosome1	86.98	169	21	1	310	477	901718	901886	4e-50	203	1	S
s_1_1_contig253601	gi|118135635|ref|NC_006088.2chromosome1	75.62	242	58	1	461	701	902823	902582	3e-39	167	30	M
s_1_1_contig14752	gi|118135635|ref|NC_006088.2chromosome1	68.51	689	147	18	1663	2319	903866	904516	2e-62	246	1	S
s_1_1_contig245679	gi|118135635|ref|NC_006088.2chromosome1	80.95	189	36	0	92	280	905635	905447	4e-43	179	943	M
s_1_1_contig155244	gi|118135635|ref|NC_006088.2chromosome1	69.6	227	65	2	555	781	906253	906031	7e-17	93	91	M
s_1_1_contig219998	gi|118135635|ref|NC_006088.2chromosome1	68.99	387	93	9	133	503	906834	907209	6e-31	141	2	S
s_1_1_contig254018	gi|118135635|ref|NC_006088.2chromosome1	83.04	224	36	2	200	423	909577	909798	3e-57	226	1	S
s_1_1_contig179698	gi|118135635|ref|NC_006088.2chromosome1	69.85	481	104	11	459	917	911124	911585	4e-49	201	2	S
s_1_1_contig224535	gi|118135635|ref|NC_006088.2chromosome1	74.11	564	122	11	333	888	911589	912136	4e-88	331	1	S
s_1_1_contig241552	gi|118135635|ref|NC_006088.2chromosome1	71.23	782	169	15	332	1067	912588	913359	1e-102	379	1	S
s_1_1_contig53899	gi|118135635|ref|NC_006088.2chromosome1	90.32	31	3	0	1196	1226	914957	914987	0.21	43	49	M
s_1_1_contig198226	gi|118135635|ref|NC_006088.2chromosome1	75.83	211	51	0	175	385	917305	917095	3e-34	150	2	S
s_1_1_contig239519	gi|118135635|ref|NC_006088.2chromosome1	87.3	244	30	1	124	366	921077	921320	5e-78	297	1	S
s_1_1_contig197399	gi|118135635|ref|NC_006088.2chromosome1	65.19	293	58	8	185	437	922178	921890	6e-11	73	38	M
s_1_1_contig129377	gi|118135635|ref|NC_006088.2chromosome1	68.33	2719	536	86	378	2892	927465	924868	0	928	1	S
s_1_1_contig94302	gi|118135635|ref|NC_006088.2chromosome1	69.52	1260	263	34	1133	2306	923647	924871	5e-138	497	2	S
s_1_1_contig226509	gi|118135635|ref|NC_006088.2chromosome1	73.49	1618	272	41	75	1616	927608	929144	0	940	1	S
s_1_1_contig246140	gi|118135635|ref|NC_006088.2chromosome1	70.57	333	77	8	52	375	929160	929480	1e-31	141	1	S
s_1_1_contig230620	gi|118135635|ref|NC_006088.2chromosome1	69.87	790	156	19	35	799	930008	930740	5e-91	340	1	S
s_1_1_contig207218	gi|118135635|ref|NC_006088.2chromosome1	71.08	332	80	6	140	466	932112	931792	1e-35	154	1	S
s_1_1_contig229111	gi|118135635|ref|NC_006088.2chromosome1	64.49	1101	266	34	699	1754	933135	932115	1e-43	183	120	M
s_1_1_contig112750	gi|118135635|ref|NC_006088.2chromosome1	74.42	129	30	3	2187	2313	933008	933135	4e-10	73	225	M
s_1_1_contig266183	gi|118135635|ref|NC_006088.2chromosome1	68.03	882	150	20	283	1125	935943	936731	2e-93	349	1	S
s_1_1_contig215708	gi|118135635|ref|NC_006088.2chromosome1	70.39	716	153	20	581	1281	937761	938432	3e-78	298	2	S
s_1_1_contig222603	gi|118135635|ref|NC_006088.2chromosome1	82.11	503	80	5	2446	2940	941874	942374	4e-135	488	2	S
s_1_1_contig227383	gi|118135635|ref|NC_006088.2chromosome1	71.89	836	141	22	144	954	942650	943416	3e-119	434	1	S
s_1_1_contig222894	gi|118135635|ref|NC_006088.2chromosome1	87.55	257	30	2	39	294	944521	944266	6e-83	313	1	S
s_1_1_contig231002	gi|118135635|ref|NC_006088.2chromosome1	75.77	388	64	9	112	489	944617	944984	6e-68	262	1	S
s_1_1_contig217573	gi|118135635|ref|NC_006088.2chromosome1	72.97	1010	202	25	168	1128	945146	946133	7e-152	542	1	S
s_1_1_contig275766	gi|118135635|ref|NC_006088.2chromosome1	72.31	130	19	2	796	908	946433	946562	3e-12	79	318	M
s_1_1_contig246473	gi|118135635|ref|NC_006088.2chromosome1	94.95	198	10	0	281	478	946378	946575	4e-83	313	1	S
s_1_1_contig219992	gi|118135635|ref|NC_006088.2chromosome1	89.1	1101	75	19	2108	3200	949390	948327	0	1400	2	S
s_1_1_contig86339	gi|118135635|ref|NC_006088.2chromosome1	70.37	540	106	17	931	1463	952420	951928	6e-56	224	3	S
s_1_1_contig241120	gi|118135635|ref|NC_006088.2chromosome1	81.75	137	23	2	112	247	953370	953505	3e-27	127	1	S
s_1_1_contig37896	gi|118135635|ref|NC_006088.2chromosome1	87.18	39	5	0	824	862	956766	956804	0.003	48	47	M
s_1_1_contig217603	gi|118135635|ref|NC_006088.2chromosome1	73.93	725	133	14	4161	4846	958015	958722	2e-121	443	1	S
s_1_1_contig230957	gi|118135635|ref|NC_006088.2chromosome1	70.85	957	197	21	74	980	959004	959928	2e-123	448	1	S
s_1_1_contig227235	gi|118135635|ref|NC_006088.2chromosome1	74.01	377	90	2	634	1002	960993	961369	7e-60	237	1	S
s_1_1_contig154603	gi|118135635|ref|NC_006088.2chromosome1	69.71	1248	290	29	1832	3049	962610	961421	2e-137	495	2	S
s_1_1_contig233967	gi|118135635|ref|NC_006088.2chromosome1	73.2	403	86	7	98	482	967356	967754	2e-57	228	1	S
s_1_1_contig181718	gi|118135635|ref|NC_006088.2chromosome1	93.1	29	2	0	396	424	968370	968342	0.031	45	17	M
s_1_1_contig6573	gi|118135635|ref|NC_006088.2chromosome1	81.33	241	43	2	57	297	970615	970377	5e-56	224	1	S
s_1_1_contig224696	gi|118135635|ref|NC_006088.2chromosome1	71.54	1560	276	46	1921	3391	972677	971197	0	756	2	S
s_1_1_contig228865	gi|118135635|ref|NC_006088.2chromosome1	80.94	362	65	3	31	389	974695	975055	7e-89	333	1	S
s_1_1_contig233630	gi|118135635|ref|NC_006088.2chromosome1	69.27	576	99	20	941	1495	976446	975928	4e-55	221	1	S
s_1_1_contig131105	gi|118135635|ref|NC_006088.2chromosome1	69.44	409	92	10	44	435	980672	980280	4e-36	159	2	S
s_1_1_contig264806	gi|118135635|ref|NC_006088.2chromosome1	71.21	198	39	5	1174	1353	985409	985606	3e-17	95	965	M
s_1_1_contig121938	gi|118135635|ref|NC_006088.2chromosome1	73.29	322	72	6	330	649	987725	987416	2e-42	179	457	M
s_1_1_contig7229	gi|118135635|ref|NC_006088.2chromosome1	93.33	30	2	0	1	30	991838	991867	0.017	46	1309	M
s_1_1_contig36075	gi|118135635|ref|NC_006088.2chromosome1	89.15	212	22	1	452	663	992706	992916	9e-72	275	1	S
s_1_1_contig241918	gi|118135635|ref|NC_006088.2chromosome1	88.73	213	23	1	236	448	994968	995179	7e-71	273	1	S
s_1_1_contig221784	gi|118135635|ref|NC_006088.2chromosome1	79.97	589	107	4	1372	1951	996581	997167	1e-145	522	2	S
s_1_1_contig246624	gi|118135635|ref|NC_006088.2chromosome1	69.27	218	39	7	277	487	997952	998148	7e-15	86	820	M
s_1_1_contig218850	gi|118135635|ref|NC_006088.2chromosome1	75.12	840	148	15	1823	2604	999722	998886	7e-157	560	1	S
s_1_1_contig223753	gi|118135635|ref|NC_006088.2chromosome1	79.52	840	122	14	751	1574	1007562	1006757	0	722	1	S
s_1_1_contig243416	gi|118135635|ref|NC_006088.2chromosome1	69.98	473	101	13	35	478	1008413	1008873	1e-46	192	1	S
s_1_1_contig185992	gi|118135635|ref|NC_006088.2chromosome1	78.95	114	21	2	523	633	1010287	1010400	3e-16	92	22	M
s_1_1_contig264768	gi|118135635|ref|NC_006088.2chromosome1	67.28	709	131	31	202	846	1012113	1011442	4e-44	185	1	S
s_1_1_contig244414	gi|118135635|ref|NC_006088.2chromosome1	72.16	1401	250	35	1	1308	1012172	1013525	0	737	1	S
s_1_1_contig238605	gi|118135635|ref|NC_006088.2chromosome1	79.56	455	88	3	121	573	1013606	1014057	4e-107	392	1	S
s_1_1_contig215204	gi|118135635|ref|NC_006088.2chromosome1	76.74	3233	539	55	1320	4437	1015273	1018407	0	2385	2	S
s_1_1_contig136373	gi|118135635|ref|NC_006088.2chromosome1	74.39	1187	227	24	2673	3833	1019666	1018531	0	731	3	S
s_1_1_contig44732	gi|118135635|ref|NC_006088.2chromosome1	92.08	101	8	0	68	168	1022841	1022741	3e-33	147	1	S
s_1_1_contig250920	gi|118135635|ref|NC_006088.2chromosome1	83.78	37	6	0	491	527	1022984	1022948	0.26	41	6	M
s_1_1_contig235732	gi|118135635|ref|NC_006088.2chromosome1	81.21	282	43	3	400	680	1023666	1023938	8e-69	266	1	S
s_1_1_contig224137	gi|118135635|ref|NC_006088.2chromosome1	67.2	378	73	12	30	384	1024703	1025052	3e-23	114	7901	M
s_1_1_contig204516	gi|118135635|ref|NC_006088.2chromosome1	72.05	805	157	20	109	867	1026590	1025808	9e-112	408	1	S
s_1_1_contig168054	gi|118135635|ref|NC_006088.2chromosome1	77.47	1429	220	22	1698	3062	1028076	1026686	0	1119	2	S
s_1_1_contig171695	gi|118135635|ref|NC_006088.2chromosome1	71.37	1792	353	39	4762	6481	1031318	1029615	0	888	4	S
s_1_1_contig224635	gi|118135635|ref|NC_006088.2chromosome1	78.28	465	74	11	116	571	1036903	1036457	1e-96	358	1	S
s_1_1_contig204757	gi|118135635|ref|NC_006088.2chromosome1	78.21	1051	177	21	117	1146	1036911	1037930	0	816	1	S
s_1_1_contig224323	gi|118135635|ref|NC_006088.2chromosome1	72.48	912	195	14	717	1605	1038715	1039593	3e-139	500	1	S
s_1_1_contig102612	gi|118135635|ref|NC_006088.2chromosome1	74.31	2203	386	61	369	2454	1044732	1042593	0	1308	2	S
s_1_1_contig108155	gi|118135635|ref|NC_006088.2chromosome1	69.22	2563	488	81	278	2760	1047366	1045025	0	971	1	S
s_1_1_contig263031	gi|118135635|ref|NC_006088.2chromosome1	70.9	2646	505	72	131	2576	1047803	1050383	0	1214	1	S
s_1_1_contig121876	gi|118135635|ref|NC_006088.2chromosome1	67.46	710	137	19	81	715	1050432	1051122	2e-60	239	2	S
s_1_1_contig96478	gi|118135635|ref|NC_006088.2chromosome1	68.35	1842	345	49	1759	3506	1058147	1056450	0	688	2	S
s_1_1_contig27853	gi|118135635|ref|NC_006088.2chromosome1	92.86	28	2	0	322	349	1056797	1056824	0.14	43	42	M
s_1_1_contig238993	gi|118135635|ref|NC_006088.2chromosome1	78.11	297	59	5	338	631	1060214	1060507	6e-57	226	1	S
s_1_1_contig139717	gi|118135635|ref|NC_006088.2chromosome1	70.59	374	72	9	772	1117	1061766	1061403	2e-40	172	1	S
s_1_1_contig142941	gi|118135635|ref|NC_006088.2chromosome1	71.54	773	159	23	177	929	1065120	1064389	3e-95	354	1	S
s_1_1_contig211720	gi|118135635|ref|NC_006088.2chromosome1	92.31	26	2	0	616	641	1066770	1066745	1.2	39	9	M
s_1_1_contig217244	gi|118135635|ref|NC_006088.2chromosome1	69.75	1299	276	26	3485	4732	1066143	1067375	2e-156	560	3	S
s_1_1_contig250339	gi|118135635|ref|NC_006088.2chromosome1	74.43	348	76	3	263	597	1070101	1069754	2e-56	224	1	S
s_1_1_contig228210	gi|118135635|ref|NC_006088.2chromosome1	70.91	526	96	14	173	671	1070301	1070796	3e-63	248	1	S
s_1_1_contig147207	gi|118135635|ref|NC_006088.2chromosome1	81.62	2089	281	41	3228	5270	1079713	1077682	0	1945	25	M
s_1_1_contig113933	gi|118135635|ref|NC_006088.2chromosome1	81.27	630	102	6	4550	5171	1088104	1088725	2e-166	592	1	S
s_1_1_contig231160	gi|118135635|ref|NC_006088.2chromosome1	74.68	154	31	3	600	745	1090330	1090177	6e-18	97	17476	M
s_1_1_contig129762	gi|118135635|ref|NC_006088.2chromosome1	70.38	1408	267	45	34	1411	1090844	1092131	2e-166	592	1	S
s_1_1_contig246097	gi|118135635|ref|NC_006088.2chromosome1	80.08	241	42	4	101	338	1095884	1095647	4e-51	206	1	S
s_1_1_contig196555	gi|118135635|ref|NC_006088.2chromosome1	70.46	325	63	15	52	352	1095941	1096256	7e-24	116	2563	M
s_1_1_contig229036	gi|118135635|ref|NC_006088.2chromosome1	71.26	769	132	16	1345	2050	1098740	1097998	1e-108	399	1	S
s_1_1_contig218061	gi|118135635|ref|NC_006088.2chromosome1	71.06	584	120	14	1516	2062	1100863	1101434	1e-70	273	2365	M
s_1_1_contig252113	gi|118135635|ref|NC_006088.2chromosome1	80.22	182	34	1	104	285	1102208	1102029	5e-38	163	1	S
s_1_1_contig189743	gi|118135635|ref|NC_006088.2chromosome1	79.56	225	46	0	294	518	1103192	1102968	6e-49	199	1	S
s_1_1_contig233817	gi|118135635|ref|NC_006088.2chromosome1	76.61	945	169	12	273	1171	1103513	1104451	0	700	1	S
s_1_1_contig228728	gi|118135635|ref|NC_006088.2chromosome1	72.36	1183	262	27	618	1779	1106714	1105576	8e-168	596	1	S
s_1_1_contig176238	gi|118135635|ref|NC_006088.2chromosome1	76.02	488	101	9	1078	1552	1109102	1109586	4e-87	327	1	S
s_1_1_contig97290	gi|118135635|ref|NC_006088.2chromosome1	71.95	1408	264	25	5872	7224	1115196	1116527	0	764	4	S
s_1_1_contig26462	gi|118135635|ref|NC_006088.2chromosome1	88.64	44	4	1	742	784	1117133	1117090	0.0001	54	157	M
s_1_1_contig245122	gi|118135635|ref|NC_006088.2chromosome1	71.22	278	58	7	461	730	1117715	1117452	1e-27	129	2	M
s_1_1_contig219303	gi|118135635|ref|NC_006088.2chromosome1	75.31	397	72	7	22	395	1119408	1119015	2e-68	266	3	S
s_1_1_contig261869	gi|118135635|ref|NC_006088.2chromosome1	68.17	1310	267	31	2137	3325	1122409	1123689	2e-132	479	2	S
s_1_1_contig166038	gi|118135635|ref|NC_006088.2chromosome1	68.66	734	153	11	621	1338	1124960	1124288	5e-81	307	2	S
s_1_1_contig222275	gi|118135635|ref|NC_006088.2chromosome1	71.94	923	216	16	225	1132	1128503	1127609	4e-128	464	1	S
s_1_1_contig274608	gi|118135635|ref|NC_006088.2chromosome1	90.24	41	3	1	164	203	1127870	1127910	8e-05	54	72	M
s_1_1_contig269011	gi|118135635|ref|NC_006088.2chromosome1	70.14	566	108	12	86	623	1128828	1129360	5e-67	260	2	S
s_1_1_contig166484	gi|118135635|ref|NC_006088.2chromosome1	70.1	2077	426	41	875	2891	1132629	1130688	0	937	2	S
s_1_1_contig224093	gi|118135635|ref|NC_006088.2chromosome1	79.1	311	59	2	1635	1945	1133828	1133524	5e-68	264	1	S
s_1_1_contig230105	gi|118135635|ref|NC_006088.2chromosome1	74.18	213	38	4	107	319	1135660	1135465	3e-29	134	3619	M
s_1_1_contig239816	gi|118135635|ref|NC_006088.2chromosome1	70.98	510	119	12	1043	1535	1137145	1137642	3e-56	224	1	S
s_1_1_contig281302	gi|118135635|ref|NC_006088.2chromosome1	81	100	9	3	538	627	1140827	1140728	2e-16	92	1699	M
s_1_1_contig278593	gi|118135635|ref|NC_006088.2chromosome1	92.73	55	4	0	574	628	1140777	1140831	1e-13	82	5688	M
s_1_1_contig82467	gi|118135635|ref|NC_006088.2chromosome1	73.9	820	173	14	1063	1870	1143132	1142342	8e-135	488	4	S
s_1_1_contig181750	gi|118135635|ref|NC_006088.2chromosome1	77.33	322	62	5	1612	1922	1147630	1147951	2e-60	239	1	S
s_1_1_contig88753	gi|118135635|ref|NC_006088.2chromosome1	76.28	468	93	5	447	899	1148853	1149317	6e-90	338	1	S
s_1_1_contig188313	gi|118135635|ref|NC_006088.2chromosome1	81.89	127	22	1	207	332	1152752	1152626	2e-25	122	6819	M
s_1_1_contig160127	gi|118135635|ref|NC_006088.2chromosome1	74.97	763	141	16	1664	2388	1154306	1155056	5e-135	488	2	S
s_1_1_contig73205	gi|118135635|ref|NC_006088.2chromosome1	73.05	987	180	18	8304	9256	1164006	1164940	9e-162	578	7	S
s_1_1_contig124159	gi|118135635|ref|NC_006088.2chromosome1	75.12	1202	223	21	94	1255	1165745	1166910	0	794	3	S
s_1_1_contig187696	gi|118135635|ref|NC_006088.2chromosome1	71.67	233	47	8	732	950	1169908	1169681	6e-20	104	1356	M
s_1_1_contig273506	gi|118135635|ref|NC_006088.2chromosome1	74.24	198	40	4	1462	1648	1169908	1169711	1e-24	120	1228	M
s_1_1_contig237685	gi|118135635|ref|NC_006088.2chromosome1	72.66	289	59	9	220	504	1169660	1169932	7e-32	143	6	M
s_1_1_contig242264	gi|118135635|ref|NC_006088.2chromosome1	68.73	806	190	15	61	822	1170753	1171540	7e-81	306	1	S
s_1_1_contig228495	gi|118135635|ref|NC_006088.2chromosome1	73	1037	194	24	895	1881	1172633	1171633	2e-162	578	2	S
s_1_1_contig200781	gi|118135635|ref|NC_006088.2chromosome1	75.98	433	81	7	892	1314	1174370	1174789	2e-79	302	1	S
s_1_1_contig217945	gi|118135635|ref|NC_006088.2chromosome1	72.79	3385	635	80	549	3835	1175503	1178699	0	1849	2	S
s_1_1_contig65783	gi|118135635|ref|NC_006088.2chromosome1	80.93	535	91	3	85	617	1184337	1184862	2e-139	502	2	S
s_1_1_contig126864	gi|118135635|ref|NC_006088.2chromosome1	67.61	886	191	21	541	1394	1188078	1188899	6e-78	297	1498	M
s_1_1_contig146287	gi|118135635|ref|NC_006088.2chromosome1	65.96	520	137	9	58	543	1189266	1189779	9e-30	136	15995	M
s_1_1_contig72882	gi|118135635|ref|NC_006088.2chromosome1	68.58	1477	344	34	350	1750	1190742	1192174	5e-147	527	1	S
s_1_1_contig194893	gi|118135635|ref|NC_006088.2chromosome1	75.61	1033	184	21	1325	2295	1202123	1201097	0	693	3	S
s_1_1_contig6500	gi|118135635|ref|NC_006088.2chromosome1	78.47	418	77	6	115	530	1202701	1203107	3e-88	333	2	S
s_1_1_contig93260	gi|118135635|ref|NC_006088.2chromosome1	68.26	1273	284	29	102	1337	1205634	1206823	3e-124	452	2	S
s_1_1_contig134460	gi|118135635|ref|NC_006088.2chromosome1	73.88	601	122	15	500	1094	1208373	1208944	1e-90	340	2	S
s_1_1_contig120902	gi|118135635|ref|NC_006088.2chromosome1	75.14	181	29	6	609	774	1212191	1212370	4e-22	111	6927	M
s_1_1_contig166733	gi|118135635|ref|NC_006088.2chromosome1	75.43	1042	158	19	1627	2649	1215385	1214423	0	728	2	S
s_1_1_contig172319	gi|118135635|ref|NC_006088.2chromosome1	96.43	28	1	0	551	578	1217298	1217325	0.006	46	16	M
s_1_1_contig267683	gi|118135635|ref|NC_006088.2chromosome1	66.5	406	92	11	288	690	1218164	1218528	9e-22	109	8167	M
s_1_1_contig66761	gi|118135635|ref|NC_006088.2chromosome1	70.09	662	134	12	2276	2911	1219616	1218993	3e-80	306	163	M
s_1_1_contig58671	gi|118135635|ref|NC_006088.2chromosome1	71.73	2441	519	53	166	2490	1221476	1223861	0	1207	1	S
s_1_1_contig221765	gi|118135635|ref|NC_006088.2chromosome1	70.03	2129	436	54	1313	3337	1224545	1226575	0	902	6	M
s_1_1_contig239348	gi|118135635|ref|NC_006088.2chromosome1	72.73	605	117	14	403	995	1228149	1228717	2e-87	327	1	S
s_1_1_contig203500	gi|118135635|ref|NC_006088.2chromosome1	76.28	974	134	26	384	1291	1228740	1229682	0	686	1	S
s_1_1_contig251770	gi|118135635|ref|NC_006088.2chromosome1	76.95	282	57	3	147	422	1235463	1235742	2e-52	210	1	S
s_1_1_contig218710	gi|118135635|ref|NC_006088.2chromosome1	66.81	946	223	28	945	1856	1236779	1235891	1e-62	246	2	S
s_1_1_contig216478	gi|118135635|ref|NC_006088.2chromosome1	70.47	1219	253	23	454	1643	1239301	1240441	7e-160	569	1	S
s_1_1_contig281813	gi|118135635|ref|NC_006088.2chromosome1	86.67	45	6	0	596	640	1241927	1241883	1e-05	55	1146	M
s_1_1_contig258504	gi|118135635|ref|NC_006088.2chromosome1	86.67	45	6	0	38	82	1241883	1241927	1e-05	55	212	M
s_1_1_contig104434	gi|118135635|ref|NC_006088.2chromosome1	72.88	992	197	19	805	1753	1243223	1242261	7e-156	556	2	S
s_1_1_contig222027	gi|118135635|ref|NC_006088.2chromosome1	82.81	733	112	6	185	905	1245974	1245244	0	740	1	S
s_1_1_contig215352	gi|118135635|ref|NC_006088.2chromosome1	71.51	1555	275	37	1574	3049	1247440	1245975	0	792	1	S
s_1_1_contig173185	gi|118135635|ref|NC_006088.2chromosome1	77.04	810	136	18	942	1716	1249673	1248879	3e-165	587	2	S
s_1_1_contig192860	gi|118135635|ref|NC_006088.2chromosome1	74.21	1908	370	30	89	1928	1254346	1252493	0	1198	1	S
s_1_1_contig200132	gi|118135635|ref|NC_006088.2chromosome1	79.68	807	114	9	41	815	1255130	1254342	0	720	1	S
s_1_1_contig62672	gi|118135635|ref|NC_006088.2chromosome1	76.28	1960	350	35	2511	4416	1258522	1256624	0	1384	4	S
s_1_1_contig238745	gi|118135635|ref|NC_006088.2chromosome1	80.56	432	81	1	211	642	1262848	1263276	5e-109	399	1	S
s_1_1_contig229310	gi|118135635|ref|NC_006088.2chromosome1	71.76	942	218	14	393	1321	1263303	1264209	2e-133	480	1	S
s_1_1_contig166958	gi|118135635|ref|NC_006088.2chromosome1	76.61	1967	314	34	607	2534	1266096	1264237	0	1452	1	S
s_1_1_contig117653	gi|118135635|ref|NC_006088.2chromosome1	72.28	2377	475	47	266	2519	1270063	1267748	0	1270	2	S
s_1_1_contig160466	gi|118135635|ref|NC_006088.2chromosome1	76.01	696	131	14	26	703	1272240	1271563	3e-130	471	3	S
s_1_1_contig213888	gi|118135635|ref|NC_006088.2chromosome1	80.96	788	129	5	35	802	1272292	1273078	0	742	1	S
s_1_1_contig269417	gi|118135635|ref|NC_006088.2chromosome1	69.55	381	66	5	9	362	1273996	1274353	3e-45	187	1	S
s_1_1_contig249808	gi|118135635|ref|NC_006088.2chromosome1	73.39	233	49	8	229	455	1274952	1274727	4e-24	116	407	M
s_1_1_contig125727	gi|118135635|ref|NC_006088.2chromosome1	74.81	135	28	2	341	471	1274798	1274930	1e-14	88	368	M
s_1_1_contig117137	gi|118135635|ref|NC_006088.2chromosome1	81.69	142	23	2	1748	1888	1274796	1274935	5e-28	132	1	S
s_1_1_contig172832	gi|118135635|ref|NC_006088.2chromosome1	71.74	1327	270	26	828	2081	1275211	1276505	0	681	1	S
s_1_1_contig156197	gi|118135635|ref|NC_006088.2chromosome1	72.67	1943	354	48	93	1963	1279555	1277718	0	1054	1	S
s_1_1_contig122365	gi|118135635|ref|NC_006088.2chromosome1	75.99	2241	378	48	1285	3482	1281668	1279545	0	1544	2	S
s_1_1_contig220993	gi|118135635|ref|NC_006088.2chromosome1	71.06	1175	235	21	64	1165	1282902	1284044	3e-165	587	2	S
s_1_1_contig116944	gi|118135635|ref|NC_006088.2chromosome1	74.24	1735	336	29	221	1876	1286814	1285112	0	1083	1	S
s_1_1_contig208836	gi|118135635|ref|NC_006088.2chromosome1	73.3	1086	218	22	1456	2486	1288014	1286946	2e-174	618	1	S
s_1_1_contig142797	gi|118135635|ref|NC_006088.2chromosome1	75.23	864	166	17	716	1559	1291148	1291983	3e-157	560	1	S
s_1_1_contig115773	gi|118135635|ref|NC_006088.2chromosome1	76.35	1336	240	21	2108	3395	1293869	1295176	0	958	3	S
s_1_1_contig229765	gi|118135635|ref|NC_006088.2chromosome1	73.24	512	93	13	270	764	1297036	1296552	2e-75	288	1	S
s_1_1_contig195521	gi|118135635|ref|NC_006088.2chromosome1	74.22	1947	346	40	100	1957	1297552	1299431	0	1209	1	S
s_1_1_contig239494	gi|118135635|ref|NC_006088.2chromosome1	68.63	322	71	10	1145	1448	1299703	1300012	7e-21	107	47808	M
s_1_1_contig205150	gi|118135635|ref|NC_006088.2chromosome1	84.84	752	88	7	650	1380	1301668	1302414	0	834	1	S
s_1_1_contig237141	gi|118135635|ref|NC_006088.2chromosome1	75.9	664	117	11	305	952	1304703	1305339	7e-129	466	1	S
s_1_1_contig23854	gi|118135635|ref|NC_006088.2chromosome1	70.22	507	104	13	190	672	1306555	1307038	3e-54	217	1	S
s_1_1_contig245581	gi|118135635|ref|NC_006088.2chromosome1	82.5	560	85	7	1	550	1307631	1307075	3e-154	549	1	S
s_1_1_contig237383	gi|118135635|ref|NC_006088.2chromosome1	79.68	556	78	8	3	524	1307618	1308172	2e-136	489	1	S
s_1_1_contig179970	gi|118135635|ref|NC_006088.2chromosome1	67.51	1068	241	25	92	1099	1310114	1309093	2e-92	345	4261	M
s_1_1_contig221556	gi|118135635|ref|NC_006088.2chromosome1	76.98	404	84	4	284	679	1310840	1310438	3e-79	300	1	S
s_1_1_contig260959	gi|118135635|ref|NC_006088.2chromosome1	73.51	1042	189	19	55	1065	1312120	1311135	5e-178	628	1	S
s_1_1_contig8826	gi|118135635|ref|NC_006088.2chromosome1	77.6	634	106	13	131	743	1314084	1313466	2e-132	477	1	S
s_1_1_contig146698	gi|118135635|ref|NC_006088.2chromosome1	71.6	250	60	6	647	890	1314999	1315243	3e-23	114	6007	M
s_1_1_contig265262	gi|118135635|ref|NC_006088.2chromosome1	78.19	1004	168	13	323	1303	1316983	1316008	0	810	1	S
s_1_1_contig145374	gi|118135635|ref|NC_006088.2chromosome1	77.27	805	144	15	1921	2706	1317987	1317203	3e-167	594	2	S
s_1_1_contig207276	gi|118135635|ref|NC_006088.2chromosome1	82.34	589	79	11	89	659	1319622	1319041	1e-159	567	1	S
s_1_1_contig82202	gi|118135635|ref|NC_006088.2chromosome1	70.38	1472	300	34	3764	5145	1322685	1321260	0	659	4	S
s_1_1_contig279037	gi|118135635|ref|NC_006088.2chromosome1	72.28	534	91	16	144	669	1326048	1325564	9e-72	275	1	S
s_1_1_contig171390	gi|118135635|ref|NC_006088.2chromosome1	93.58	218	14	0	794	1011	1326632	1326415	2e-88	331	1	S
s_1_1_contig243981	gi|118135635|ref|NC_006088.2chromosome1	76.4	822	145	20	147	937	1329794	1330597	6e-158	562	1	S
s_1_1_contig139454	gi|118135635|ref|NC_006088.2chromosome1	80.9	665	103	6	82	725	1330633	1331294	2e-175	621	2	S
s_1_1_contig39487	gi|118135635|ref|NC_006088.2chromosome1	86.84	38	3	1	254	289	1331588	1331551	0.023	45	38	M
s_1_1_contig223894	gi|118135635|ref|NC_006088.2chromosome1	71.98	1285	264	31	908	2122	1333784	1335042	0	641	4	S
s_1_1_contig101089	gi|118135635|ref|NC_006088.2chromosome1	78.33	1329	225	25	1489	2772	1339575	1340885	0	1043	2	S
s_1_1_contig225143	gi|118135635|ref|NC_006088.2chromosome1	74.46	1484	290	28	115	1552	1345088	1343648	0	922	1	S
s_1_1_contig157737	gi|118135635|ref|NC_006088.2chromosome1	73.32	1597	325	25	284	1835	1345460	1347000	0	939	3	S
s_1_1_contig97014	gi|118135635|ref|NC_006088.2chromosome1	68.56	1835	430	47	30	1800	1354318	1352567	1e-177	628	1	S
s_1_1_contig278069	gi|118135635|ref|NC_006088.2chromosome1	78.86	317	57	2	665	980	1354317	1354624	6e-70	269	1	S
s_1_1_contig167981	gi|118135635|ref|NC_006088.2chromosome1	70.08	1661	335	29	34	1558	1354920	1356554	0	771	1	S
s_1_1_contig84883	gi|118135635|ref|NC_006088.2chromosome1	74.77	1502	257	29	8870	10306	1365629	1367073	0	980	7	S
s_1_1_contig229885	gi|118135635|ref|NC_006088.2chromosome1	80.13	463	80	6	1788	2248	1368248	1367796	3e-110	405	1	S
s_1_1_contig135054	gi|118135635|ref|NC_006088.2chromosome1	78.24	1048	176	11	468	1471	1369782	1370821	0	859	2	S
s_1_1_contig218224	gi|118135635|ref|NC_006088.2chromosome1	75.48	1986	343	42	328	2267	1378170	1376283	0	1326	2	S
s_1_1_contig189895	gi|118135635|ref|NC_006088.2chromosome1	66.75	1567	368	47	148	1637	1378582	1380072	6e-110	403	1	S
s_1_1_contig110993	gi|118135635|ref|NC_006088.2chromosome1	82.92	855	120	12	779	1616	1381029	1381874	0	854	6	S
s_1_1_contig245952	gi|118135635|ref|NC_006088.2chromosome1	76.84	665	121	9	100	734	1391726	1392387	6e-138	495	1	S
s_1_1_contig235651	gi|118135635|ref|NC_006088.2chromosome1	77.98	863	138	17	282	1113	1392627	1393468	0	670	1	S
s_1_1_contig242446	gi|118135635|ref|NC_006088.2chromosome1	75.77	586	120	13	185	765	1394697	1394129	1e-102	378	1	S
s_1_1_contig251613	gi|118135635|ref|NC_006088.2chromosome1	73.17	410	88	7	57	465	1394884	1395272	6e-59	232	1	S
s_1_1_contig229367	gi|118135635|ref|NC_006088.2chromosome1	73.09	1137	213	17	2106	3167	1396394	1395276	0	679	2	S
s_1_1_contig190686	gi|118135635|ref|NC_006088.2chromosome1	75.42	899	159	22	112	992	1400904	1400050	9e-164	581	1	S
s_1_1_contig230121	gi|118135635|ref|NC_006088.2chromosome1	71.34	1019	204	20	52	1046	1401184	1402138	1e-142	511	1	S
s_1_1_contig123426	gi|118135635|ref|NC_006088.2chromosome1	81.01	79	15	0	1628	1706	1402399	1402477	5e-11	75	729	M
s_1_1_contig210511	gi|118135635|ref|NC_006088.2chromosome1	75.24	1062	216	19	132	1176	1402615	1403646	0	686	1	S
s_1_1_contig218636	gi|118135635|ref|NC_006088.2chromosome1	73.57	1154	226	18	153	1272	1406149	1405041	0	697	2	S
s_1_1_contig252194	gi|118135635|ref|NC_006088.2chromosome1	71.04	625	134	16	223	832	1407124	1407716	9e-74	282	1	S
s_1_1_contig184191	gi|118135635|ref|NC_006088.2chromosome1	77.33	860	171	12	680	1528	1408738	1407892	0	639	1	S
s_1_1_contig122878	gi|118135635|ref|NC_006088.2chromosome1	71.2	1302	267	28	239	1477	1411453	1410197	2e-177	628	1	S
s_1_1_contig202222	gi|118135635|ref|NC_006088.2chromosome1	80.24	167	28	3	360	526	1412388	1412227	5e-32	143	1	S
s_1_1_contig254374	gi|118135635|ref|NC_006088.2chromosome1	73.03	267	59	3	48	314	1413134	1412881	4e-36	156	5	M
s_1_1_contig268387	gi|118135635|ref|NC_006088.2chromosome1	72.87	1725	306	40	561	2187	1417799	1419459	0	967	1	S
s_1_1_contig221021	gi|118135635|ref|NC_006088.2chromosome1	84.8	934	120	11	289	1214	1419924	1420843	0	1014	1	S
s_1_1_contig217873	gi|118135635|ref|NC_006088.2chromosome1	81.65	850	116	12	146	968	1423536	1422700	0	812	1	S
s_1_1_contig37705	gi|118135635|ref|NC_006088.2chromosome1	75.79	570	94	9	9	562	1424378	1423837	8e-111	405	1	S
s_1_1_contig222975	gi|118135635|ref|NC_006088.2chromosome1	69.32	1392	320	34	319	1663	1425742	1424411	6e-148	529	1	S
s_1_1_contig147970	gi|118135635|ref|NC_006088.2chromosome1	75.97	1527	247	29	682	2150	1428734	1427270	0	1077	2	S
s_1_1_contig150920	gi|118135635|ref|NC_006088.2chromosome1	81.5	1189	189	12	496	1666	1431467	1430292	0	1126	261	M
s_1_1_contig192447	gi|118135635|ref|NC_006088.2chromosome1	73.32	656	144	11	136	768	1432493	1431846	6e-101	372	1	S
s_1_1_contig232554	gi|118135635|ref|NC_006088.2chromosome1	72.21	529	115	11	1600	2106	1433323	1432805	3e-70	271	1	S
s_1_1_contig275874	gi|118135635|ref|NC_006088.2chromosome1	93.1	29	2	0	341	369	1434859	1434831	0.02	45	12	M
s_1_1_contig211970	gi|118135635|ref|NC_006088.2chromosome1	95.83	24	1	0	82	105	1436546	1436569	1.1	39	3	M
s_1_1_contig36428	gi|118135635|ref|NC_006088.2chromosome1	75.96	312	64	6	60	369	1437338	1437036	1e-51	208	1	S
s_1_1_contig269123	gi|118135635|ref|NC_006088.2chromosome1	74.56	798	166	14	134	905	1438512	1439298	1e-137	495	1	S
s_1_1_contig153661	gi|118135635|ref|NC_006088.2chromosome1	76.4	1360	256	25	235	1545	1442491	1441148	0	951	1	S
s_1_1_contig173106	gi|118135635|ref|NC_006088.2chromosome1	75.41	797	153	14	644	1432	1443847	1443086	7e-148	529	1	S
s_1_1_contig137762	gi|118135635|ref|NC_006088.2chromosome1	75.64	1010	203	14	553	1533	1445565	1446560	0	688	1	S
s_1_1_contig262913	gi|118135635|ref|NC_006088.2chromosome1	78.89	199	40	2	639	837	1447174	1447370	6e-38	163	1	S
s_1_1_contig232801	gi|118135635|ref|NC_006088.2chromosome1	76.57	717	133	10	53	748	1449406	1450108	4e-146	522	1	S
s_1_1_contig179489	gi|118135635|ref|NC_006088.2chromosome1	68.02	1604	351	46	106	1626	1450107	1451631	2e-144	518	2	S
s_1_1_contig51736	gi|118135635|ref|NC_006088.2chromosome1	80.59	407	75	4	1525	1931	1454296	1453894	8e-98	363	1	S
s_1_1_contig119403	gi|118135635|ref|NC_006088.2chromosome1	75.97	799	132	13	524	1266	1457101	1457895	4e-160	571	3	S
s_1_1_contig194821	gi|118135635|ref|NC_006088.2chromosome1	75.57	1265	219	22	1408	2647	1463763	1462564	0	870	2	S
s_1_1_contig172673	gi|118135635|ref|NC_006088.2chromosome1	68.99	1106	246	28	445	1501	1465587	1466644	5e-112	410	1	S
s_1_1_contig165184	gi|118135635|ref|NC_006088.2chromosome1	69.69	1069	215	33	1124	2165	1469161	1468175	5e-114	417	2	S
s_1_1_contig149171	gi|118135635|ref|NC_006088.2chromosome1	85.23	650	86	2	120	759	1472814	1472165	0	740	1	S
s_1_1_contig138191	gi|118135635|ref|NC_006088.2chromosome1	76.57	350	64	6	609	943	1474480	1474134	3e-64	251	1	S
s_1_1_contig107120	gi|118135635|ref|NC_006088.2chromosome1	71	862	189	18	4032	4869	1479919	1480743	6e-109	401	3	S
s_1_1_contig220097	gi|118135635|ref|NC_006088.2chromosome1	76.16	860	168	15	563	1398	1481258	1482104	7e-167	592	2	S
s_1_1_contig233626	gi|118135635|ref|NC_006088.2chromosome1	65.95	749	177	18	225	920	1482988	1482265	4e-46	190	9961	M
s_1_1_contig173361	gi|118135635|ref|NC_006088.2chromosome1	84.1	692	81	9	6	681	1489074	1488396	0	738	1	S
s_1_1_contig33004	gi|118135635|ref|NC_006088.2chromosome1	93.33	30	2	0	96	125	1488726	1488697	0.008	46	285	M
s_1_1_contig120049	gi|118135635|ref|NC_006088.2chromosome1	71.42	3023	631	60	77	3028	1489818	1492678	0	1496	1	S
s_1_1_contig217396	gi|118135635|ref|NC_006088.2chromosome1	70.26	1597	313	44	4202	5709	1495298	1493775	0	686	3	S
s_1_1_contig117208	gi|118135635|ref|NC_006088.2chromosome1	74.93	766	129	17	2962	3694	1499522	1498787	9e-138	497	413	M
s_1_1_contig186549	gi|118135635|ref|NC_006088.2chromosome1	71.3	453	73	13	124	567	1503370	1502966	2e-56	224	1	S
s_1_1_contig231821	gi|118135635|ref|NC_006088.2chromosome1	73.98	1099	203	25	104	1147	1503565	1504635	0	655	1	S
s_1_1_contig226215	gi|118135635|ref|NC_006088.2chromosome1	78.85	52	11	0	1441	1492	1526303	1526354	0.081	45	22	M
s_1_1_contig156691	gi|118135635|ref|NC_006088.2chromosome1	77.35	1064	198	15	128	1162	1541149	1540100	0	803	1	S
s_1_1_contig174036	gi|118135635|ref|NC_006088.2chromosome1	77.93	589	108	9	233	803	1541291	1541875	7e-126	455	1	S
s_1_1_contig170328	gi|118135635|ref|NC_006088.2chromosome1	72.94	909	155	23	64	936	1542885	1543738	4e-142	509	2	M
s_1_1_contig226098	gi|118135635|ref|NC_006088.2chromosome1	69.05	349	87	9	65	398	1544220	1544562	2e-25	122	764	M
s_1_1_contig252185	gi|118135635|ref|NC_006088.2chromosome1	72.73	396	100	3	365	754	1546214	1545821	2e-55	221	1	S
s_1_1_contig125847	gi|118135635|ref|NC_006088.2chromosome1	72.09	1745	341	40	5779	7435	1548027	1546341	0	902	4	S
s_1_1_contig42050	gi|118135635|ref|NC_006088.2chromosome1	88.24	34	3	1	259	291	1546511	1546478	0.24	41	40	M
s_1_1_contig148806	gi|118135635|ref|NC_006088.2chromosome1	78.93	617	93	6	184	798	1557037	1557618	3e-149	533	1	S
s_1_1_contig94241	gi|118135635|ref|NC_006088.2chromosome1	68.8	1000	202	27	2238	3157	1560027	1560996	6e-101	374	3	S
s_1_1_contig205616	gi|118135635|ref|NC_006088.2chromosome1	71.79	312	46	9	8	281	1562291	1561984	7e-38	163	1	S
s_1_1_contig205733	gi|118135635|ref|NC_006088.2chromosome1	68.75	320	73	10	325	630	1562758	1562452	8e-21	105	45	M
s_1_1_contig137282	gi|118135635|ref|NC_006088.2chromosome1	70.11	1763	386	47	70	1755	1566101	1564403	0	719	2	S
s_1_1_contig150204	gi|118135635|ref|NC_006088.2chromosome1	71.97	1859	369	44	362	2149	1566118	1567895	0	942	14	M
s_1_1_contig172345	gi|118135635|ref|NC_006088.2chromosome1	74.09	359	69	8	216	565	1568744	1569087	3e-53	214	1	S
s_1_1_contig126217	gi|118135635|ref|NC_006088.2chromosome1	73.54	1546	265	37	1080	2521	1573312	1571807	0	908	1	S
s_1_1_contig186480	gi|118135635|ref|NC_006088.2chromosome1	73.79	580	118	17	61	617	1575147	1574579	9e-84	315	1	S
s_1_1_contig223215	gi|118135635|ref|NC_006088.2chromosome1	70.23	608	131	8	594	1153	1575543	1576148	7e-76	289	1	S
s_1_1_contig239841	gi|118135635|ref|NC_006088.2chromosome1	69.21	367	77	7	56	398	1576368	1576722	3e-35	154	24419	M
s_1_1_contig148771	gi|118135635|ref|NC_006088.2chromosome1	75.04	653	119	13	417	1059	1577347	1577965	2e-116	425	1	S
s_1_1_contig221643	gi|118135635|ref|NC_006088.2chromosome1	73.54	1954	358	47	629	2514	1584234	1582372	0	1124	3	S
s_1_1_contig274654	gi|118135635|ref|NC_006088.2chromosome1	71.11	1028	229	24	118	1103	1586599	1585598	1e-129	468	1	S
s_1_1_contig12997	gi|118135635|ref|NC_006088.2chromosome1	79.17	936	160	12	638	1546	1591060	1590133	0	787	2	S
s_1_1_contig180856	gi|118135635|ref|NC_006088.2chromosome1	78.98	1194	219	16	195	1361	1592050	1593238	0	978	1	S
s_1_1_contig225144	gi|118135635|ref|NC_006088.2chromosome1	75.15	1018	173	14	185	1146	1595312	1594319	0	704	1	S
s_1_1_contig218820	gi|118135635|ref|NC_006088.2chromosome1	78.21	1427	262	22	2407	3807	1598135	1596732	0	1117	2	S
s_1_1_contig119259	gi|118135635|ref|NC_006088.2chromosome1	82.24	1188	180	16	55	1223	1602443	1603618	0	1148	3	S
s_1_1_contig281301	gi|118135635|ref|NC_006088.2chromosome1	71.56	218	51	4	90	296	1608927	1609144	6e-21	105	13779	M
s_1_1_contig226815	gi|118135635|ref|NC_006088.2chromosome1	70.2	792	169	16	226	1004	1609353	1610090	1e-94	352	1	S
s_1_1_contig241765	gi|118135635|ref|NC_006088.2chromosome1	78.91	806	137	11	874	1650	1612980	1612179	0	668	2	S
s_1_1_contig144197	gi|118135635|ref|NC_006088.2chromosome1	83.08	65	7	2	1208	1271	1615289	1615228	5e-07	63	187	M
s_1_1_contig236656	gi|118135635|ref|NC_006088.2chromosome1	69.86	1105	243	26	164	1200	1616533	1615451	1e-125	455	2	S
s_1_1_contig251515	gi|118135635|ref|NC_006088.2chromosome1	88.64	88	9	1	765	851	1616698	1616611	3e-22	111	28052	M
s_1_1_contig116097	gi|118135635|ref|NC_006088.2chromosome1	77.13	682	123	12	84	753	1617433	1618093	9e-140	502	2	S
s_1_1_contig229633	gi|118135635|ref|NC_006088.2chromosome1	67.84	1076	226	36	125	1117	1619714	1620752	3e-87	327	1	S
s_1_1_contig108975	gi|118135635|ref|NC_006088.2chromosome1	81.02	137	24	2	1	137	1621411	1621277	2e-25	123	17351	M
s_1_1_contig121521	gi|118135635|ref|NC_006088.2chromosome1	72.38	905	179	14	499	1355	1621616	1622497	1e-140	506	1	S
s_1_1_contig145131	gi|118135635|ref|NC_006088.2chromosome1	82.54	1054	160	12	463	1504	1625393	1624352	0	1040	2	S
s_1_1_contig155131	gi|118135635|ref|NC_006088.2chromosome1	77.67	1003	195	14	1248	2228	1627699	1626704	0	762	2	S
s_1_1_contig147170	gi|118135635|ref|NC_006088.2chromosome1	80.95	1302	185	25	2248	3502	1632503	1631218	0	1175	3	S
s_1_1_contig123258	gi|118135635|ref|NC_006088.2chromosome1	71.72	1015	191	19	1039	1963	1640592	1639584	3e-150	538	2	S
s_1_1_contig114032	gi|118135635|ref|NC_006088.2chromosome1	74.73	918	166	21	755	1646	1643771	1642894	2e-161	574	1	S
s_1_1_contig209698	gi|118135635|ref|NC_006088.2chromosome1	70.5	1322	260	34	237	1542	1644380	1645587	3e-166	590	2	S
s_1_1_contig146970	gi|118135635|ref|NC_006088.2chromosome1	79.76	746	134	9	1081	1816	1650359	1649621	1e-180	639	2	S
s_1_1_contig239883	gi|118135635|ref|NC_006088.2chromosome1	72.66	640	123	15	54	669	1651664	1652275	7e-93	345	1	S
s_1_1_contig185719	gi|118135635|ref|NC_006088.2chromosome1	73.98	488	97	8	230	696	1653252	1652774	8e-79	298	1	S
s_1_1_contig263355	gi|118135635|ref|NC_006088.2chromosome1	100	23	0	0	663	685	1652859	1652881	0.44	43	38	M
s_1_1_contig89982	gi|118135635|ref|NC_006088.2chromosome1	75.31	1045	208	18	3823	4847	1657866	1658880	0	686	2	S
s_1_1_contig220634	gi|118135635|ref|NC_006088.2chromosome1	75.63	1182	203	22	6422	7550	1665529	1666678	0	810	4	S
s_1_1_contig162970	gi|118135635|ref|NC_006088.2chromosome1	75.75	998	162	29	3004	3973	1671494	1670549	0	650	2	S
s_1_1_contig275723	gi|118135635|ref|NC_006088.2chromosome1	65.36	511	131	17	36	513	1672281	1672778	6e-16	90	629	M
s_1_1_contig234777	gi|118135635|ref|NC_006088.2chromosome1	72.86	1415	280	32	72	1423	1672799	1674172	0	771	1	S
s_1_1_contig276855	gi|118135635|ref|NC_006088.2chromosome1	67.72	666	135	20	6	654	1675920	1675318	3e-53	214	1	S
s_1_1_contig164321	gi|118135635|ref|NC_006088.2chromosome1	71.55	935	208	23	74	979	1677887	1676982	1e-119	435	2	S
s_1_1_contig241277	gi|118135635|ref|NC_006088.2chromosome1	73.71	776	140	17	135	867	1677912	1678666	2e-127	461	1	S
s_1_1_contig260500	gi|118135635|ref|NC_006088.2chromosome1	86.49	37	5	0	230	266	1679753	1679789	0.022	45	35	M
s_1_1_contig240200	gi|118135635|ref|NC_006088.2chromosome1	70.33	583	121	8	917	1462	1680674	1680107	1e-73	282	1	S
s_1_1_contig238898	gi|118135635|ref|NC_006088.2chromosome1	68.8	516	125	9	405	909	1681897	1682387	3e-48	197	18	M
s_1_1_contig129261	gi|118135635|ref|NC_006088.2chromosome1	75.11	221	47	2	2180	2392	1683883	1684103	3e-33	149	1	S
s_1_1_contig197897	gi|118135635|ref|NC_006088.2chromosome1	79.6	353	62	7	369	713	1684358	1684708	1e-75	289	2	S
s_1_1_contig221665	gi|118135635|ref|NC_006088.2chromosome1	68.98	1338	318	34	1117	2414	1687668	1686388	6e-132	477	2	S
s_1_1_contig232178	gi|118135635|ref|NC_006088.2chromosome1	70.63	606	140	12	98	686	1688946	1689530	1e-70	271	1	S
s_1_1_contig121075	gi|118135635|ref|NC_006088.2chromosome1	73.27	1302	264	26	1877	3134	1692295	1693556	0	738	3	S
s_1_1_contig178103	gi|118135635|ref|NC_006088.2chromosome1	76.52	673	105	17	530	1156	1696623	1695958	6e-131	473	2	S
s_1_1_contig220062	gi|118135635|ref|NC_006088.2chromosome1	74.39	2136	406	43	117	2161	1699831	1697746	0	1319	1	S
s_1_1_contig246970	gi|118135635|ref|NC_006088.2chromosome1	81.94	310	44	4	213	513	1700368	1700062	2e-79	300	1	S
s_1_1_contig217669	gi|118135635|ref|NC_006088.2chromosome1	67.49	926	203	24	787	1657	1701667	1702549	9e-77	293	1	S
s_1_1_contig145520	gi|118135635|ref|NC_006088.2chromosome1	74.31	1090	174	32	1843	2864	1706139	1705088	0	655	2	S
s_1_1_contig226453	gi|118135635|ref|NC_006088.2chromosome1	73.36	274	69	3	338	607	1708805	1709078	9e-36	156	1	S
s_1_1_contig261176	gi|118135635|ref|NC_006088.2chromosome1	70.25	437	93	12	280	705	1710316	1710726	4e-43	181	1	S
s_1_1_contig248706	gi|118135635|ref|NC_006088.2chromosome1	74.46	372	66	10	295	652	1711273	1711629	3e-56	224	2	S
s_1_1_contig146660	gi|118135635|ref|NC_006088.2chromosome1	71.28	1358	257	31	258	1527	1713626	1714938	0	672	1	S
s_1_1_contig182256	gi|118135635|ref|NC_006088.2chromosome1	67.03	1298	333	34	589	1847	1717570	1718811	9e-92	343	2	S
s_1_1_contig39840	gi|118135635|ref|NC_006088.2chromosome1	80.93	236	37	6	573	805	1721086	1720856	5e-50	203	1	S
s_1_1_contig36310	gi|118135635|ref|NC_006088.2chromosome1	70.89	347	91	5	23	361	1722559	1722215	2e-36	158	1	S
s_1_1_contig68996	gi|118135635|ref|NC_006088.2chromosome1	71.11	2852	558	57	432	3102	1725455	1722689	0	1411	1	S
s_1_1_contig171780	gi|118135635|ref|NC_006088.2chromosome1	74.06	794	162	13	6	770	1726890	1726112	1e-134	484	1	S
s_1_1_contig102329	gi|118135635|ref|NC_006088.2chromosome1	70.06	825	182	18	72	883	1743736	1744508	8e-95	352	1	S
s_1_1_contig241288	gi|118135635|ref|NC_006088.2chromosome1	77.36	53	12	0	703	755	1746100	1746152	0.14	43	51	M
s_1_1_contig230932	gi|118135635|ref|NC_006088.2chromosome1	77.23	382	77	4	392	765	1750592	1750971	3e-75	288	1	S
s_1_1_contig220337	gi|118135635|ref|NC_006088.2chromosome1	79.02	1249	212	21	1062	2273	1754198	1752963	0	1021	1	S
s_1_1_contig132192	gi|118135635|ref|NC_006088.2chromosome1	74.34	1446	267	39	224	1615	1755201	1756596	0	854	1	S
s_1_1_contig37308	gi|118135635|ref|NC_006088.2chromosome1	88.57	35	3	1	702	735	1767166	1767132	0.12	43	25	M
s_1_1_contig124652	gi|118135635|ref|NC_006088.2chromosome1	73.19	455	86	8	1845	2272	1773364	1773809	4e-69	268	1	S
s_1_1_contig269431	gi|118135635|ref|NC_006088.2chromosome1	81.5	1016	170	5	43	1047	1773851	1774859	0	978	1	S
s_1_1_contig222422	gi|118135635|ref|NC_006088.2chromosome1	81.14	1453	223	15	1854	3279	1777259	1775831	0	1364	2	S
s_1_1_contig237911	gi|118135635|ref|NC_006088.2chromosome1	96.77	31	1	0	332	362	1778477	1778507	0.0003	52	90	M
s_1_1_contig276159	gi|118135635|ref|NC_006088.2chromosome1	71.95	845	174	17	116	914	1778995	1779822	6e-120	435	1	S
s_1_1_contig151016	gi|118135635|ref|NC_006088.2chromosome1	78.31	332	64	2	241	572	1780352	1780029	4e-71	273	1	S
s_1_1_contig232550	gi|118135635|ref|NC_006088.2chromosome1	74.17	600	137	8	80	671	1785207	1784618	6e-98	363	1	S
s_1_1_contig265870	gi|118135635|ref|NC_006088.2chromosome1	87.44	621	71	3	36	652	1789926	1789309	0	762	2	S
s_1_1_contig278631	gi|118135635|ref|NC_006088.2chromosome1	71.88	377	69	10	116	467	1790047	1790411	2e-46	190	8	M
s_1_1_contig148317	gi|118135635|ref|NC_006088.2chromosome1	68.87	1834	384	51	43	1791	1792148	1790417	0	672	1	S
s_1_1_contig261058	gi|118135635|ref|NC_006088.2chromosome1	73.81	1237	232	24	2	1169	1795283	1794070	0	746	2	S
s_1_1_contig222043	gi|118135635|ref|NC_006088.2chromosome1	74.02	2517	457	50	168	2545	1797719	1795261	0	1543	1	S
s_1_1_contig40273	gi|118135635|ref|NC_006088.2chromosome1	69.24	569	129	10	1	553	1798463	1797925	4e-59	233	1	S
s_1_1_contig149493	gi|118135635|ref|NC_006088.2chromosome1	72.8	1081	233	8	7	1036	1798415	1799485	0	645	1	S
s_1_1_contig149572	gi|118135635|ref|NC_006088.2chromosome1	75.98	1149	190	18	874	1965	1801011	1799892	0	825	2	S
s_1_1_contig251487	gi|118135635|ref|NC_006088.2chromosome1	70.67	525	122	11	46	545	1804179	1803662	8e-59	232	1	S
s_1_1_contig231525	gi|118135635|ref|NC_006088.2chromosome1	75.5	1102	221	14	20	1076	1805278	1804181	0	751	1	S
s_1_1_contig240793	gi|118135635|ref|NC_006088.2chromosome1	73.53	729	139	16	57	747	1805294	1806006	1e-115	421	1	S
s_1_1_contig278387	gi|118135635|ref|NC_006088.2chromosome1	79.12	661	107	9	29	683	1806043	1806678	7e-157	558	1	S
s_1_1_contig244122	gi|118135635|ref|NC_006088.2chromosome1	70.42	311	73	6	92	389	1807628	1807932	4e-30	136	1	S
s_1_1_contig243620	gi|118135635|ref|NC_006088.2chromosome1	64.3	479	99	11	68	527	1812105	1812530	7e-22	109	4772	M
s_1_1_contig197369	gi|118135635|ref|NC_006088.2chromosome1	72.82	710	142	18	195	883	1813888	1813209	5e-102	376	1	S
s_1_1_contig221171	gi|118135635|ref|NC_006088.2chromosome1	80	525	101	4	633	1154	1818206	1817683	2e-126	459	2	S
s_1_1_contig17872	gi|118135635|ref|NC_006088.2chromosome1	72.15	984	206	25	352	1300	1819685	1820635	2e-135	488	1	S
s_1_1_contig241105	gi|118135635|ref|NC_006088.2chromosome1	74.65	497	100	10	289	765	1821628	1821138	2e-81	307	1	S
s_1_1_contig86759	gi|118135635|ref|NC_006088.2chromosome1	72.5	680	135	17	301	942	1824396	1825061	7e-95	354	3	S
s_1_1_contig236196	gi|118135635|ref|NC_006088.2chromosome1	93.75	32	2	0	691	722	1829009	1828978	0.0006	50	1612	M
s_1_1_contig223763	gi|118135635|ref|NC_006088.2chromosome1	76.54	503	96	9	47	536	1831342	1830849	3e-95	354	1	S
s_1_1_contig99543	gi|118135635|ref|NC_006088.2chromosome1	71.46	473	103	10	3637	4083	1832422	1831956	8e-57	228	1	S
s_1_1_contig165765	gi|118135635|ref|NC_006088.2chromosome1	70.43	1380	286	31	1808	3093	1834668	1833317	8e-175	619	2	S
s_1_1_contig181292	gi|118135635|ref|NC_006088.2chromosome1	74.72	447	77	13	77	515	1838120	1837702	2e-70	271	1	S
s_1_1_contig150422	gi|118135635|ref|NC_006088.2chromosome1	70.7	1157	261	30	224	1329	1838315	1839444	4e-137	493	1	S
s_1_1_contig15668	gi|118135635|ref|NC_006088.2chromosome1	74.53	911	182	19	41	922	1866231	1867120	3e-156	556	1	S
s_1_1_contig116645	gi|118135635|ref|NC_006088.2chromosome1	81.9	442	71	6	1371	1807	1869241	1869678	9e-114	417	2	S
s_1_1_contig184644	gi|118135635|ref|NC_006088.2chromosome1	75.2	746	140	14	49	754	1872722	1873462	3e-136	489	1	S
s_1_1_contig145176	gi|118135635|ref|NC_006088.2chromosome1	73.14	1221	241	24	1514	2701	1876626	1875460	0	693	1	S
s_1_1_contig119618	gi|118135635|ref|NC_006088.2chromosome1	80.94	724	96	11	3131	3845	1878591	1877901	0	672	2	S
s_1_1_contig216462	gi|118135635|ref|NC_006088.2chromosome1	74.2	376	79	4	407	779	1883021	1882661	1e-60	239	1	S
s_1_1_contig227857	gi|118135635|ref|NC_006088.2chromosome1	78.29	1575	260	22	21	1556	1883246	1884777	0	1274	1	S
s_1_1_contig242712	gi|118135635|ref|NC_006088.2chromosome1	76.65	771	142	11	24	768	1886423	1885665	3e-158	563	2	S
s_1_1_contig26599	gi|118135635|ref|NC_006088.2chromosome1	74.63	753	135	17	1155	1858	1890339	1889594	2e-130	471	2	S
s_1_1_contig262899	gi|118135635|ref|NC_006088.2chromosome1	78.49	172	34	2	487	655	1892496	1892325	2e-30	138	1	S
s_1_1_contig136424	gi|118135635|ref|NC_006088.2chromosome1	71.61	958	190	22	1414	2326	1894865	1895785	5e-132	477	1	S
s_1_1_contig132135	gi|118135635|ref|NC_006088.2chromosome1	77.61	1907	349	27	272	2126	1898691	1896811	0	1463	2	S
s_1_1_contig163417	gi|118135635|ref|NC_006088.2chromosome1	76.08	715	147	12	2075	2782	1899391	1898694	1e-134	486	2	S
s_1_1_contig249053	gi|118135635|ref|NC_006088.2chromosome1	67.19	506	107	15	196	686	1901663	1902124	3e-34	150	3854	M
s_1_1_contig193735	gi|118135635|ref|NC_006088.2chromosome1	84.38	352	52	3	184	534	1906642	1906293	5e-102	376	2	S
s_1_1_contig197974	gi|118135635|ref|NC_006088.2chromosome1	68.74	483	113	12	388	854	1907239	1906779	4e-40	170	1	S
s_1_1_contig246428	gi|118135635|ref|NC_006088.2chromosome1	73.38	278	61	4	244	518	1908478	1908745	2e-37	161	97	M
s_1_1_contig238774	gi|118135635|ref|NC_006088.2chromosome1	74.85	660	133	14	125	764	1910531	1909885	8e-112	408	1	S
s_1_1_contig167881	gi|118135635|ref|NC_006088.2chromosome1	73.54	1236	238	29	146	1322	1912505	1911300	0	704	1	S
s_1_1_contig221051	gi|118135635|ref|NC_006088.2chromosome1	75.21	468	93	8	1553	1999	1913054	1912589	2e-80	306	2	S
s_1_1_contig95740	gi|118135635|ref|NC_006088.2chromosome1	67.55	1430	302	39	529	1829	1916610	1915214	4e-126	457	1	S
s_1_1_contig242170	gi|118135635|ref|NC_006088.2chromosome1	66.71	766	162	27	87	808	1917988	1918704	3e-47	194	5637	M
s_1_1_contig228989	gi|118135635|ref|NC_006088.2chromosome1	74.15	704	156	8	89	771	1918828	1919526	1e-120	437	1	S
s_1_1_contig99841	gi|118135635|ref|NC_006088.2chromosome1	77.78	495	91	9	78	561	1920298	1920784	5e-101	374	1	S
s_1_1_contig263559	gi|118135635|ref|NC_006088.2chromosome1	83.33	48	7	1	2045	2091	1920781	1920828	0.011	48	139	M
s_1_1_contig155134	gi|118135635|ref|NC_006088.2chromosome1	76.88	800	167	10	834	1625	1922788	1923577	4e-163	580	27	M
s_1_1_contig232845	gi|118135635|ref|NC_006088.2chromosome1	70.66	634	132	15	322	923	1925037	1925648	1e-74	286	126	M
s_1_1_contig252385	gi|118135635|ref|NC_006088.2chromosome1	95.24	42	1	1	486	526	1926777	1926818	2e-08	64	1701	M
s_1_1_contig205910	gi|118135635|ref|NC_006088.2chromosome1	85.71	63	7	1	758	818	1926775	1926837	2e-10	72	17740	M
s_1_1_contig200188	gi|118135635|ref|NC_006088.2chromosome1	76.08	1208	213	30	64	1237	1928221	1927056	0	809	1	S
s_1_1_contig268714	gi|118135635|ref|NC_006088.2chromosome1	79.29	1487	228	22	1377	2794	1929857	1931332	0	1267	3	S
s_1_1_contig236002	gi|118135635|ref|NC_006088.2chromosome1	80.23	1548	252	20	616	2128	1932109	1933637	0	1371	1	S
s_1_1_contig106493	gi|118135635|ref|NC_006088.2chromosome1	76.96	1137	164	28	987	2056	1934878	1933773	0	832	1	S
s_1_1_contig227677	gi|118135635|ref|NC_006088.2chromosome1	75.12	418	92	6	444	858	1937215	1937623	9e-70	269	14	M
s_1_1_contig65290	gi|118135635|ref|NC_006088.2chromosome1	75.41	1277	223	30	441	1665	1940985	1939748	0	834	2591	M
s_1_1_contig97367	gi|118135635|ref|NC_006088.2chromosome1	71.09	1197	228	33	2499	3610	1944207	1945370	1e-155	556	1	S
s_1_1_contig220860	gi|118135635|ref|NC_006088.2chromosome1	70.74	2023	410	53	200	2098	1952105	1950141	0	904	2	S
s_1_1_contig229659	gi|118135635|ref|NC_006088.2chromosome1	78.09	1319	222	20	102	1366	1953759	1952454	0	1047	1	S
s_1_1_contig80544	gi|118135635|ref|NC_006088.2chromosome1	79.61	1682	270	28	5544	7189	1960577	1962221	0	1427	3	S
s_1_1_contig204990	gi|118135635|ref|NC_006088.2chromosome1	65.88	677	133	13	502	1160	1963716	1964312	7e-52	210	1	S
s_1_1_contig25147	gi|118135635|ref|NC_006088.2chromosome1	87.8	41	2	2	508	546	1965418	1965457	0.01	46	87	M
s_1_1_contig232679	gi|118135635|ref|NC_006088.2chromosome1	75.47	689	129	12	70	733	1966395	1965722	7e-128	462	2	S
s_1_1_contig96654	gi|118135635|ref|NC_006088.2chromosome1	74.93	1751	322	38	194	1870	1968675	1966968	0	1113	1	S
s_1_1_contig106059	gi|118135635|ref|NC_006088.2chromosome1	72.72	964	180	19	452	1376	1973137	1972218	2e-151	542	2	S
s_1_1_contig276536	gi|118135635|ref|NC_006088.2chromosome1	77.26	1051	167	17	167	1182	1973980	1974993	0	807	1	S
s_1_1_contig245284	gi|118135635|ref|NC_006088.2chromosome1	70.32	711	137	21	28	702	1975092	1975764	2e-80	304	1	S
s_1_1_contig197240	gi|118135635|ref|NC_006088.2chromosome1	70.29	579	121	13	127	675	1975788	1976345	2e-66	257	1	S
s_1_1_contig220794	gi|118135635|ref|NC_006088.2chromosome1	73.2	2134	389	38	2658	4707	1979022	1981056	0	1263	5	S
s_1_1_contig155614	gi|118135635|ref|NC_006088.2chromosome1	80.86	1703	261	19	565	2233	1985292	1986963	0	1575	1	S
s_1_1_contig236899	gi|118135635|ref|NC_006088.2chromosome1	71.22	556	138	9	286	821	1987084	1987637	3e-67	260	1	S
s_1_1_contig162398	gi|118135635|ref|NC_006088.2chromosome1	79.38	2794	433	32	120	2804	1990976	1988217	0	2426	1	S
s_1_1_contig208617	gi|118135635|ref|NC_006088.2chromosome1	69.93	459	99	18	508	936	1991578	1992027	1e-36	159	7140	M
s_1_1_contig213527	gi|118135635|ref|NC_006088.2chromosome1	75.73	206	35	4	62	256	1993042	1992841	7e-32	141	1	S
s_1_1_contig220972	gi|118135635|ref|NC_006088.2chromosome1	73.76	587	88	12	39	610	1993054	1993589	2e-100	370	1	S
s_1_1_contig219755	gi|118135635|ref|NC_006088.2chromosome1	72.72	843	155	22	1168	1951	1994961	1995787	2e-124	452	1	S
s_1_1_contig260763	gi|118135635|ref|NC_006088.2chromosome1	79.09	770	123	11	763	1500	1997463	1998226	0	648	1	S
s_1_1_contig78439	gi|118135635|ref|NC_006088.2chromosome1	73.41	1335	264	29	1990	3272	2000762	2002057	0	758	4	S
s_1_1_contig14797	gi|118135635|ref|NC_006088.2chromosome1	80.36	112	21	1	1025	1135	2013485	2013596	2e-18	100	50	M
s_1_1_contig106354	gi|118135635|ref|NC_006088.2chromosome1	74.62	1438	264	29	5890	7296	2016416	2017783	0	908	8	S
s_1_1_contig134781	gi|118135635|ref|NC_006088.2chromosome1	78.35	1894	317	28	1152	2980	2025380	2027245	0	1525	3	S
s_1_1_contig11095	gi|118135635|ref|NC_006088.2chromosome1	73.85	1476	272	27	1103	2509	2034258	2032828	0	902	3	S
s_1_1_contig251616	gi|118135635|ref|NC_006088.2chromosome1	73.4	188	48	2	71	257	2035644	2035830	2e-21	107	8916	M
s_1_1_contig218263	gi|118135635|ref|NC_006088.2chromosome1	75.67	1385	254	25	1984	3337	2038813	2040145	0	940	2	S
s_1_1_contig101673	gi|118135635|ref|NC_006088.2chromosome1	81.62	1126	166	15	389	1484	2040497	2041611	0	1067	4	S
s_1_1_contig188636	gi|118135635|ref|NC_006088.2chromosome1	79.13	623	97	10	119	712	2049531	2048913	7e-146	522	1	S
s_1_1_contig233795	gi|118135635|ref|NC_006088.2chromosome1	76.09	732	149	9	908	1623	2051299	2050578	2e-143	515	1	S
s_1_1_contig216427	gi|118135635|ref|NC_006088.2chromosome1	71.4	1133	241	29	1043	2128	2052833	2051737	3e-147	527	1	S
s_1_1_contig142145	gi|118135635|ref|NC_006088.2chromosome1	72.69	2435	415	60	1953	4299	2055820	2053548	0	1348	2	S
s_1_1_contig196289	gi|118135635|ref|NC_006088.2chromosome1	79.17	576	100	10	189	760	2058440	2058999	8e-131	471	1	S
s_1_1_contig70386	gi|118135635|ref|NC_006088.2chromosome1	81.74	2004	295	23	389	2360	2059364	2061328	0	1925	3	S
s_1_1_contig207439	gi|118135635|ref|NC_006088.2chromosome1	96.55	29	0	1	1508	1536	2067631	2067604	0.067	45	62	M
s_1_1_contig133079	gi|118135635|ref|NC_006088.2chromosome1	79.7	1217	207	11	3830	5029	2070099	2071292	0	1068	4	S
s_1_1_contig259233	gi|118135635|ref|NC_006088.2chromosome1	66.76	346	82	7	74	406	2071414	2071739	3e-20	104	9671	M
s_1_1_contig263669	gi|118135635|ref|NC_006088.2chromosome1	78.19	1027	146	21	1	971	2073638	2072634	0	818	1	S
s_1_1_contig142648	gi|118135635|ref|NC_006088.2chromosome1	76.57	1468	272	19	565	2004	2079248	2077825	0	1076	2	S
s_1_1_contig90837	gi|118135635|ref|NC_006088.2chromosome1	82.76	1195	170	13	6638	7810	2085841	2084661	0	1200	6	S
s_1_1_contig103322	gi|118135635|ref|NC_006088.2chromosome1	76.35	1683	240	35	5903	7556	2095767	2094214	0	1225	6	S
s_1_1_contig2860	gi|118135635|ref|NC_006088.2chromosome1	100	29	0	0	532	560	2096828	2096856	4e-05	54	49	M
s_1_1_contig11522	gi|118135635|ref|NC_006088.2chromosome1	70.69	969	184	28	1529	2464	2104514	2103613	2e-118	432	2	S
s_1_1_contig172354	gi|118135635|ref|NC_006088.2chromosome1	83.33	48	8	0	506	553	2105871	2105824	0.0005	52	157	M
s_1_1_contig168166	gi|118135635|ref|NC_006088.2chromosome1	70.83	1145	200	27	267	1341	2107465	2106385	2e-156	558	1	S
s_1_1_contig131484	gi|118135635|ref|NC_006088.2chromosome1	73.75	381	77	4	1040	1404	2108314	2108687	2e-60	239	2	S
s_1_1_contig232956	gi|118135635|ref|NC_006088.2chromosome1	74.37	796	139	18	471	1248	2110856	2110108	3e-137	493	1	S
s_1_1_contig230102	gi|118135635|ref|NC_006088.2chromosome1	69.09	563	101	14	527	1069	2112920	2112411	5e-59	233	178	M
s_1_1_contig220624	gi|118135635|ref|NC_006088.2chromosome1	83.89	540	76	4	52	588	2113175	2113706	1e-161	574	1	S
s_1_1_contig71709	gi|118135635|ref|NC_006088.2chromosome1	80.66	4483	634	52	4944	9290	2119282	2123667	0	4152	17	M
s_1_1_contig144991	gi|118135635|ref|NC_006088.2chromosome1	73.73	510	120	9	590	1096	2127178	2126680	4e-75	288	1	S
s_1_1_contig180700	gi|118135635|ref|NC_006088.2chromosome1	72.05	1052	188	24	490	1463	2128192	2129215	8e-157	560	3	S
s_1_1_contig262653	gi|118135635|ref|NC_006088.2chromosome1	75.05	934	173	9	1119	2025	2133788	2134688	0	648	5	S
s_1_1_contig107044	gi|118135635|ref|NC_006088.2chromosome1	70.49	2870	562	75	4037	6749	2140322	2143063	0	1276	3	S
s_1_1_contig55143	gi|118135635|ref|NC_006088.2chromosome1	74.93	3714	694	75	1357	4948	2153001	2149403	0	2376	3	S
s_1_1_contig146903	gi|118135635|ref|NC_006088.2chromosome1	72.18	1481	270	33	3752	5124	2158169	2159615	0	792	3	S
s_1_1_contig54457	gi|118135635|ref|NC_006088.2chromosome1	67.85	1328	284	32	1160	2428	2162808	2164051	2e-125	455	2	S
s_1_1_contig165645	gi|118135635|ref|NC_006088.2chromosome1	76.72	726	117	16	1351	2047	2167065	2166363	2e-145	522	2	S
s_1_1_contig81545	gi|118135635|ref|NC_006088.2chromosome1	69.87	2164	430	53	4396	6484	2171198	2169182	0	924	6	S
s_1_1_contig170677	gi|118135635|ref|NC_006088.2chromosome1	81.01	158	27	3	1	155	2173745	2173588	9e-31	140	34	M
s_1_1_contig136536	gi|118135635|ref|NC_006088.2chromosome1	72.98	1388	251	29	97	1420	2182033	2180706	0	794	2	S
s_1_1_contig125497	gi|118135635|ref|NC_006088.2chromosome1	76.11	988	181	15	2077	3039	2183801	2184758	0	700	3	S
s_1_1_contig80454	gi|118135635|ref|NC_006088.2chromosome1	82.93	873	130	7	4049	4913	2188814	2189675	0	888	29	M
s_1_1_contig259366	gi|118135635|ref|NC_006088.2chromosome1	76.56	64	14	1	169	232	2193612	2193550	0.024	45	65	M
s_1_1_contig148658	gi|118135635|ref|NC_006088.2chromosome1	74.1	691	130	11	206	849	2198112	2197424	5e-119	434	2	S
s_1_1_contig180624	gi|118135635|ref|NC_006088.2chromosome1	69.35	1860	364	54	171	1935	2198624	2200372	0	728	899	M
s_1_1_contig234829	gi|118135635|ref|NC_006088.2chromosome1	69.92	615	124	10	132	691	2202144	2202752	9e-75	286	1	S
s_1_1_contig143389	gi|118135635|ref|NC_006088.2chromosome1	70.98	2061	450	45	1376	3365	2207448	2205465	0	951	3	S
s_1_1_contig164322	gi|118135635|ref|NC_006088.2chromosome1	72.86	1938	377	41	1	1877	2209025	2210874	0	1074	1	S
s_1_1_contig243588	gi|118135635|ref|NC_006088.2chromosome1	71.88	633	114	12	138	707	2212332	2212963	2e-92	343	1	S
s_1_1_contig98281	gi|118135635|ref|NC_006088.2chromosome1	78	1591	282	27	229	1794	2213741	2215288	0	1231	4	S
s_1_1_contig248668	gi|118135635|ref|NC_006088.2chromosome1	90	30	3	0	297	326	2219627	2219598	0.37	41	33	M
s_1_1_contig179995	gi|118135635|ref|NC_006088.2chromosome1	73.62	777	159	20	674	1430	2221963	2221213	1e-117	428	1	S
s_1_1_contig4068	gi|118135635|ref|NC_006088.2chromosome1	79	1243	193	21	3344	4548	2223771	2222559	0	1032	3	S
s_1_1_contig142170	gi|118135635|ref|NC_006088.2chromosome1	79.74	1446	218	22	4209	5601	2232760	2231337	0	1256	3265	M
s_1_1_contig275023	gi|118135635|ref|NC_006088.2chromosome1	77.67	103	21	1	1100	1200	2241655	2241757	6e-13	81	230	M
s_1_1_contig82656	gi|118135635|ref|NC_006088.2chromosome1	78.76	226	43	3	149	369	2243853	2243628	6e-43	183	510	M
s_1_1_contig107410	gi|118135635|ref|NC_006088.2chromosome1	73.77	2958	589	51	1509	4375	2245258	2248119	0	1775	2	S
s_1_1_contig235398	gi|118135635|ref|NC_006088.2chromosome1	77.66	367	74	3	90	456	2248781	2248423	3e-75	286	1	S
s_1_1_contig64464	gi|118135635|ref|NC_006088.2chromosome1	75.24	1155	207	20	983	2110	2252490	2251388	0	774	199	M
s_1_1_contig127531	gi|118135635|ref|NC_006088.2chromosome1	73.24	2455	414	44	1135	3501	2253801	2256100	0	1487	1	S
s_1_1_contig216384	gi|118135635|ref|NC_006088.2chromosome1	76.17	1725	243	30	2333	3906	2258121	2259828	0	1274	8	M
s_1_1_contig52622	gi|118135635|ref|NC_006088.2chromosome1	77.56	1105	193	10	2134	3203	2268644	2269728	0	879	3	S
s_1_1_contig239757	gi|118135635|ref|NC_006088.2chromosome1	82.28	79	14	0	808	886	2270371	2270293	5e-13	81	18391	M
s_1_1_contig229073	gi|118135635|ref|NC_006088.2chromosome1	79.83	1185	199	12	421	1569	2270716	2271896	0	1041	211	M
s_1_1_contig164439	gi|118135635|ref|NC_006088.2chromosome1	84.48	1121	160	9	548	1661	2274312	2275425	0	1209	2	S
s_1_1_contig276768	gi|118135635|ref|NC_006088.2chromosome1	75.6	209	44	2	397	599	2278149	2277942	2e-32	145	1	S
s_1_1_contig35975	gi|118135635|ref|NC_006088.2chromosome1	80.76	369	56	3	57	411	2280047	2280414	5e-93	345	1	S
s_1_1_contig153666	gi|118135635|ref|NC_006088.2chromosome1	69.81	1040	196	26	2123	3117	2282059	2283025	1e-123	450	2	S
s_1_1_contig149393	gi|118135635|ref|NC_006088.2chromosome1	77.05	1002	186	17	89	1073	2284693	2285667	0	733	3	S
s_1_1_contig35554	gi|118135635|ref|NC_006088.2chromosome1	74.66	596	119	13	1	573	2287609	2287023	8e-99	365	1	S
s_1_1_contig268967	gi|118135635|ref|NC_006088.2chromosome1	72.05	1388	248	33	16	1326	2287629	2288953	0	731	1	S
s_1_1_contig36736	gi|118135635|ref|NC_006088.2chromosome1	80.82	73	12	1	515	587	2289020	2289090	7e-09	66	4470	M
s_1_1_contig230180	gi|118135635|ref|NC_006088.2chromosome1	71.43	742	157	17	186	904	2289394	2290103	5e-96	356	1	S
s_1_1_contig207591	gi|118135635|ref|NC_006088.2chromosome1	71.72	145	31	1	257	401	2290279	2290145	7e-14	82	7921	M
s_1_1_contig170636	gi|118135635|ref|NC_006088.2chromosome1	73.85	654	139	11	953	1592	2291818	2291183	2e-105	389	1	S
s_1_1_contig145892	gi|118135635|ref|NC_006088.2chromosome1	83.15	718	98	9	4268	4966	2296594	2295881	0	729	2	S
s_1_1_contig165677	gi|118135635|ref|NC_006088.2chromosome1	68.63	1409	312	29	48	1389	2304175	2302830	3e-149	535	3	S
s_1_1_contig151140	gi|118135635|ref|NC_006088.2chromosome1	76.85	337	74	3	649	985	2304375	2304707	1e-62	246	39	M
s_1_1_contig276631	gi|118135635|ref|NC_006088.2chromosome1	88.24	34	4	0	324	357	2307881	2307848	0.04	45	38	M
s_1_1_contig215898	gi|118135635|ref|NC_006088.2chromosome1	75.13	559	80	10	2627	3127	2309132	2309689	8e-106	390	2	S
s_1_1_contig186313	gi|118135635|ref|NC_006088.2chromosome1	81.82	44	8	0	383	426	2311384	2311427	0.044	45	63	M
s_1_1_contig249761	gi|118135635|ref|NC_006088.2chromosome1	96.15	26	1	0	356	381	2313761	2313786	0.097	43	9	M
s_1_1_contig92920	gi|118135635|ref|NC_006088.2chromosome1	74.15	1648	305	39	2284	3853	2312489	2314093	0	985	4	S
s_1_1_contig148756	gi|118135635|ref|NC_006088.2chromosome1	75.51	927	181	18	1291	2186	2317741	2318652	2e-171	609	4	S
s_1_1_contig216414	gi|118135635|ref|NC_006088.2chromosome1	66.67	309	67	6	669	957	2321750	2321458	2e-18	99	5050	M
s_1_1_contig203642	gi|118135635|ref|NC_006088.2chromosome1	78.64	880	164	15	1880	2757	2322736	2321879	0	693	3	S
s_1_1_contig96256	gi|118135635|ref|NC_006088.2chromosome1	75.32	1637	298	33	141	1741	2332999	2331433	0	1077	3	S
s_1_1_contig222337	gi|118135635|ref|NC_006088.2chromosome1	72.82	1100	208	21	450	1506	2334818	2333767	4e-176	623	1	S
s_1_1_contig159025	gi|118135635|ref|NC_006088.2chromosome1	72.18	1549	325	37	3765	5273	2337427	2335945	0	780	2	S
s_1_1_contig220732	gi|118135635|ref|NC_006088.2chromosome1	81.31	888	135	12	2315	3196	2343109	2343971	0	827	3	S
s_1_1_contig169527	gi|118135635|ref|NC_006088.2chromosome1	82.91	556	84	7	387	932	2346621	2346067	8e-155	553	3	S
s_1_1_contig181217	gi|118135635|ref|NC_006088.2chromosome1	70.12	1111	234	22	1198	2227	2348201	2347108	5e-138	497	1	S
s_1_1_contig127690	gi|118135635|ref|NC_006088.2chromosome1	73.43	1178	211	26	3748	4845	2351163	2352318	0	688	3	S
s_1_1_contig262425	gi|118135635|ref|NC_006088.2chromosome1	83.33	78	9	3	3643	3718	2356753	2356678	3e-10	73	9842	M
s_1_1_contig164474	gi|118135635|ref|NC_006088.2chromosome1	84.43	880	117	11	91	962	2357837	2356970	0	939	3	S
s_1_1_contig160149	gi|118135635|ref|NC_006088.2chromosome1	76.97	608	107	11	309	899	2359596	2360187	6e-123	446	1	S
s_1_1_contig87780	gi|118135635|ref|NC_006088.2chromosome1	73.76	1395	234	31	1349	2691	2367948	2366634	0	845	6	M
s_1_1_contig162826	gi|118135635|ref|NC_006088.2chromosome1	74.97	1510	261	34	315	1744	2374061	2372589	0	971	3	S
s_1_1_contig227718	gi|118135635|ref|NC_006088.2chromosome1	81.16	658	106	11	39	686	2374551	2375200	1e-167	594	1	S
s_1_1_contig183273	gi|118135635|ref|NC_006088.2chromosome1	69.81	1686	402	35	50	1688	2377582	2375957	0	684	1	S
s_1_1_contig117185	gi|118135635|ref|NC_006088.2chromosome1	74.71	1036	188	13	1968	2982	2379090	2380072	0	695	2	S
s_1_1_contig277485	gi|118135635|ref|NC_006088.2chromosome1	78.63	131	26	2	25	154	2381105	2381234	4e-20	104	7339	M
s_1_1_contig196635	gi|118135635|ref|NC_006088.2chromosome1	74.41	633	108	8	202	788	2382058	2381434	1e-116	425	1	S
s_1_1_contig230548	gi|118135635|ref|NC_006088.2chromosome1	79.57	514	80	4	257	762	2384543	2384047	1e-126	459	2	S
s_1_1_contig216968	gi|118135635|ref|NC_006088.2chromosome1	73.7	2970	582	58	824	3659	2385521	2388425	0	1754	1	S
s_1_1_contig156679	gi|118135635|ref|NC_006088.2chromosome1	79.52	503	88	7	250	745	2389620	2389126	2e-116	425	2	S
s_1_1_contig243915	gi|118135635|ref|NC_006088.2chromosome1	76.56	401	75	4	143	540	2389857	2390241	7e-79	298	1	S
s_1_1_contig93628	gi|118135635|ref|NC_006088.2chromosome1	69.32	4364	881	110	2441	6580	2396478	2392349	0	1750	3	S
s_1_1_contig41677	gi|118135635|ref|NC_006088.2chromosome1	87.88	33	4	0	621	653	2397843	2397811	0.088	43	14	M
s_1_1_contig88618	gi|118135635|ref|NC_006088.2chromosome1	76.53	1436	259	22	2746	4132	2400061	2398655	0	1041	3	S
s_1_1_contig149390	gi|118135635|ref|NC_006088.2chromosome1	75.62	1095	201	17	475	1513	2406878	2405794	0	755	3	S
s_1_1_contig140412	gi|118135635|ref|NC_006088.2chromosome1	82.69	52	8	1	1983	2034	2412395	2412445	0.002	50	48	M
s_1_1_contig113265	gi|118135635|ref|NC_006088.2chromosome1	77.99	895	142	12	6242	7128	2414372	2415219	0	722	1654	M
s_1_1_contig166943	gi|118135635|ref|NC_006088.2chromosome1	72.61	1862	398	37	2208	4012	2419195	2417389	0	993	2	S
s_1_1_contig282638	gi|118135635|ref|NC_006088.2chromosome1	92.31	26	2	0	167	192	2421826	2421801	0.8	39	32	M
s_1_1_contig215882	gi|118135635|ref|NC_006088.2chromosome1	73.25	2437	412	56	330	2615	2420775	2423122	0	1420	24	M
s_1_1_contig113500	gi|118135635|ref|NC_006088.2chromosome1	71.87	782	165	9	1852	2612	2431379	2430632	3e-117	428	3	S
s_1_1_contig170022	gi|118135635|ref|NC_006088.2chromosome1	74.89	876	195	11	151	1011	2433444	2434309	1e-157	562	1	S
s_1_1_contig219931	gi|118135635|ref|NC_006088.2chromosome1	75.19	2821	492	63	1	2690	2434859	2437602	0	1835	4	S
s_1_1_contig223102	gi|118135635|ref|NC_006088.2chromosome1	79.26	540	104	7	416	953	2441398	2441931	1e-122	444	7	M
s_1_1_contig221127	gi|118135635|ref|NC_006088.2chromosome1	75.62	812	144	16	116	891	2442550	2443343	4e-154	549	1	S
s_1_1_contig133203	gi|118135635|ref|NC_006088.2chromosome1	73.02	971	159	22	683	1628	2448344	2447452	8e-158	563	135	M
s_1_1_contig261064	gi|118135635|ref|NC_006088.2chromosome1	74.9	2179	356	50	3318	5428	2452088	2454143	0	1411	3	S
s_1_1_contig130570	gi|118135635|ref|NC_006088.2chromosome1	72.69	2472	474	46	2674	5041	2457726	2455352	0	1389	9	M
s_1_1_contig104641	gi|118135635|ref|NC_006088.2chromosome1	80.49	1753	284	10	3682	5392	2464917	2466653	0	1627	5	S
s_1_1_contig81896	gi|118135635|ref|NC_006088.2chromosome1	75.42	1062	213	16	303	1335	2468766	2469808	0	710	6	S
s_1_1_contig189788	gi|118135635|ref|NC_006088.2chromosome1	100	23	0	0	249	271	2470742	2470720	0.067	43	101	M
s_1_1_contig216167	gi|118135635|ref|NC_006088.2chromosome1	69.87	1905	364	43	1896	3720	2482453	2480679	0	843	3	S
s_1_1_contig228601	gi|118135635|ref|NC_006088.2chromosome1	78.75	2231	393	29	127	2304	2487008	2484806	0	1829	1	S
s_1_1_contig36795	gi|118135635|ref|NC_006088.2chromosome1	78.6	715	134	9	45	743	2488535	2487824	3e-162	576	1	S
s_1_1_contig209386	gi|118135635|ref|NC_006088.2chromosome1	75.81	678	142	12	1111	1776	2489671	2489004	6e-124	450	1	S
s_1_1_contig217212	gi|118135635|ref|NC_006088.2chromosome1	72.71	2829	537	58	4219	7001	2493013	2495652	0	1572	2	S
s_1_1_contig224833	gi|118135635|ref|NC_006088.2chromosome1	67.84	2192	462	48	102	2139	2495646	2497748	0	778	1	S
s_1_1_contig122425	gi|118135635|ref|NC_006088.2chromosome1	73.94	2264	404	51	569	2774	2501171	2499036	0	1361	2	S
s_1_1_contig276767	gi|118135635|ref|NC_006088.2chromosome1	96.15	26	1	0	693	718	2499079	2499054	0.18	43	38	M
s_1_1_contig106513	gi|118135635|ref|NC_006088.2chromosome1	79.44	496	69	3	9	486	2503018	2503498	3e-124	452	4	M
s_1_1_contig27486	gi|118135635|ref|NC_006088.2chromosome1	74.98	1023	174	28	194	1153	2507210	2506207	0	639	1	S
s_1_1_contig160497	gi|118135635|ref|NC_006088.2chromosome1	72.28	1371	275	19	5791	7100	2510111	2508785	0	769	8	M
s_1_1_contig183645	gi|118135635|ref|NC_006088.2chromosome1	73.25	1331	232	34	21	1283	2514307	2515581	0	755	1	S
s_1_1_contig12961	gi|118135635|ref|NC_006088.2chromosome1	73.52	321	72	8	278	590	2516202	2515887	2e-40	172	270	M
s_1_1_contig243711	gi|118135635|ref|NC_006088.2chromosome1	69.05	391	83	10	1143	1529	2516060	2516416	2e-33	149	4	M
s_1_1_contig219063	gi|118135635|ref|NC_006088.2chromosome1	67.72	604	165	13	476	1063	2515888	2516477	1e-42	179	97	M
s_1_1_contig116698	gi|118135635|ref|NC_006088.2chromosome1	74.91	1112	207	24	116	1186	2516642	2517722	0	704	4	S
s_1_1_contig229320	gi|118135635|ref|NC_006088.2chromosome1	81.63	98	17	1	2875	2971	2517751	2517848	3e-16	93	8808	M
s_1_1_contig123918	gi|118135635|ref|NC_006088.2chromosome1	71.9	1434	297	29	1711	3117	2524762	2526116	0	735	3	S
s_1_1_contig92675	gi|118135635|ref|NC_006088.2chromosome1	72.9	1284	233	28	239	1446	2531551	2530307	0	724	2	S
s_1_1_contig239089	gi|118135635|ref|NC_006088.2chromosome1	69.92	1719	296	47	3	1592	2533177	2531551	0	756	3	M
s_1_1_contig194864	gi|118135635|ref|NC_006088.2chromosome1	76.93	2609	477	39	1480	4036	2535611	2538146	0	1929	3	S
s_1_1_contig219784	gi|118135635|ref|NC_006088.2chromosome1	72.01	2222	472	41	6	2120	2545796	2543618	0	1153	1	S
s_1_1_contig224975	gi|118135635|ref|NC_006088.2chromosome1	74.37	597	120	9	121	712	2547168	2546600	9e-102	376	2	S
s_1_1_contig121036	gi|118135635|ref|NC_006088.2chromosome1	79.52	2807	400	35	175	2842	2547331	2550101	0	2470	1	S
s_1_1_contig116711	gi|118135635|ref|NC_006088.2chromosome1	78.51	1568	233	28	1	1509	2554682	2553160	0	1276	8	M
s_1_1_contig8329	gi|118135635|ref|NC_006088.2chromosome1	70.36	830	163	23	2036	2826	2557367	2558152	1e-96	360	2	S
s_1_1_contig222618	gi|118135635|ref|NC_006088.2chromosome1	85.71	42	6	0	444	485	2560552	2560593	0.0009	50	392	M
s_1_1_contig114581	gi|118135635|ref|NC_006088.2chromosome1	71.99	1892	343	25	69	1827	2562887	2561050	0	1079	2	S
s_1_1_contig159833	gi|118135635|ref|NC_006088.2chromosome1	71.08	1103	258	26	3932	4998	2570131	2571208	2e-135	489	3	S
s_1_1_contig278065	gi|118135635|ref|NC_006088.2chromosome1	75.93	324	63	3	1	322	2575390	2575080	3e-59	233	1	S
s_1_1_contig223407	gi|118135635|ref|NC_006088.2chromosome1	79.74	627	103	8	1208	1830	2577924	2578530	3e-152	544	2	S
s_1_1_contig75252	gi|118135635|ref|NC_006088.2chromosome1	80.5	887	131	11	2406	3273	2579491	2578628	0	809	1	S
s_1_1_contig223092	gi|118135635|ref|NC_006088.2chromosome1	78.71	1118	179	15	61	1130	2580765	2581871	0	930	1	S
s_1_1_contig93602	gi|118135635|ref|NC_006088.2chromosome1	73.22	2222	425	45	5033	7203	2585758	2583656	0	1276	4	S
s_1_1_contig81286	gi|118135635|ref|NC_006088.2chromosome1	82.88	666	84	7	223	862	2590966	2591627	0	682	2	S
s_1_1_contig201611	gi|118135635|ref|NC_006088.2chromosome1	72.23	965	191	24	785	1706	2594776	2595706	5e-137	493	1	S
s_1_1_contig222886	gi|118135635|ref|NC_006088.2chromosome1	80.39	362	69	2	626	987	2598039	2597680	2e-86	325	1	S
s_1_1_contig166534	gi|118135635|ref|NC_006088.2chromosome1	78.66	389	78	5	5095	5481	2607467	2607852	4e-81	309	9	M
s_1_1_contig101535	gi|118135635|ref|NC_006088.2chromosome1	79.56	1634	277	17	173	1757	2612674	2611049	0	1416	2	S
s_1_1_contig29602	gi|118135635|ref|NC_006088.2chromosome1	91.89	37	2	1	64	99	2612211	2612175	0.0009	50	38	M
s_1_1_contig78162	gi|118135635|ref|NC_006088.2chromosome1	70.02	994	209	23	650	1574	2616770	2615797	1e-116	426	2	S
s_1_1_contig107258	gi|118135635|ref|NC_006088.2chromosome1	74.36	2898	574	45	202	2993	2622024	2619190	0	1826	2	S
s_1_1_contig6999	gi|118135635|ref|NC_006088.2chromosome1	76.84	1481	235	28	239	1635	2623968	2622512	0	1095	1	S
s_1_1_contig40111	gi|118135635|ref|NC_006088.2chromosome1	83.49	327	45	4	665	990	2624504	2624186	4e-90	336	1	S
s_1_1_contig82871	gi|118135635|ref|NC_006088.2chromosome1	75.85	1201	221	19	270	1447	2624860	2626014	0	836	2	S
s_1_1_contig221924	gi|118135635|ref|NC_006088.2chromosome1	69.92	921	202	22	497	1371	2629799	2630690	3e-103	381	2	S
s_1_1_contig184460	gi|118135635|ref|NC_006088.2chromosome1	87.88	33	4	0	98	130	2635485	2635453	0.14	43	27	M
s_1_1_contig68564	gi|118135635|ref|NC_006088.2chromosome1	75.3	984	176	21	3438	4398	2657030	2657969	0	645	4	S
s_1_1_contig183395	gi|118135635|ref|NC_006088.2chromosome1	85.45	55	7	1	1418	1471	2658275	2658221	7e-07	61	573	M
s_1_1_contig180052	gi|118135635|ref|NC_006088.2chromosome1	70.78	308	73	9	1171	1468	2658039	2658339	3e-26	125	1	S
s_1_1_contig78919	gi|118135635|ref|NC_006088.2chromosome1	81.76	910	123	10	146	1034	2663918	2663031	0	886	1	S
s_1_1_contig40411	gi|118135635|ref|NC_006088.2chromosome1	75.51	147	31	3	817	961	2668781	2668924	2e-17	95	46	M
s_1_1_contig111105	gi|118135635|ref|NC_006088.2chromosome1	79.57	514	66	6	1618	2094	2672871	2672360	2e-127	462	5	S
s_1_1_contig264793	gi|118135635|ref|NC_006088.2chromosome1	72.3	1368	272	36	37	1326	2679899	2678561	0	693	3	S
s_1_1_contig96056	gi|118135635|ref|NC_006088.2chromosome1	70.5	3488	718	78	10988	14283	2688870	2692238	0	1581	8	S
s_1_1_contig233115	gi|118135635|ref|NC_006088.2chromosome1	68.78	237	65	3	398	628	2692934	2692701	7e-16	90	26	M
s_1_1_contig100965	gi|118135635|ref|NC_006088.2chromosome1	79.79	747	130	7	1394	2127	2694638	2695376	0	654	3	S
s_1_1_contig167211	gi|118135635|ref|NC_006088.2chromosome1	75.72	935	162	18	292	1196	2700674	2699775	0	641	2	S
s_1_1_contig236782	gi|118135635|ref|NC_006088.2chromosome1	72.49	676	129	12	778	1400	2701725	2702396	2e-102	378	1	S
s_1_1_contig106132	gi|118135635|ref|NC_006088.2chromosome1	79.67	1092	136	21	142	1202	2711790	2710754	0	951	5	S
s_1_1_contig3569	gi|118135635|ref|NC_006088.2chromosome1	73.84	558	94	13	35	586	2711892	2712403	7e-90	336	1	S
s_1_1_contig104602	gi|118135635|ref|NC_006088.2chromosome1	78.37	1304	240	23	8437	9717	2717797	2719081	0	1014	4	S
s_1_1_contig157916	gi|118135635|ref|NC_006088.2chromosome1	73.78	1251	257	21	988	2203	2720817	2722031	0	747	1	S
s_1_1_contig234920	gi|118135635|ref|NC_006088.2chromosome1	76.85	501	102	6	143	634	2725321	2724826	2e-99	367	1	S
s_1_1_contig230990	gi|118135635|ref|NC_006088.2chromosome1	95.24	42	2	0	790	831	2725931	2725972	3e-09	68	13333	M
s_1_1_contig127379	gi|118135635|ref|NC_006088.2chromosome1	75.88	2160	407	35	2491	4605	2727502	2729592	0	1492	2	S
s_1_1_contig215946	gi|118135635|ref|NC_006088.2chromosome1	69.65	1766	353	40	1117	2739	2732363	2730638	0	753	2	S
s_1_1_contig219491	gi|118135635|ref|NC_006088.2chromosome1	70.72	4108	832	84	3966	7875	2737259	2733325	0	1941	3	S
s_1_1_contig164801	gi|118135635|ref|NC_006088.2chromosome1	70.41	1024	195	20	1034	1959	2743738	2742725	3e-135	488	2	S
s_1_1_contig278719	gi|118135635|ref|NC_006088.2chromosome1	68.56	334	73	8	390	702	2743935	2744257	2e-25	122	96	M
s_1_1_contig233014	gi|118135635|ref|NC_006088.2chromosome1	70.72	871	175	24	305	1139	2744306	2745132	2e-104	385	2	S
s_1_1_contig54453	gi|118135635|ref|NC_006088.2chromosome1	74.7	1652	329	28	1434	3017	2749160	2750790	0	1049	6	S
s_1_1_contig207475	gi|118135635|ref|NC_006088.2chromosome1	79.04	167	31	2	1	167	2751234	2751072	3e-30	138	124	M
s_1_1_contig270103	gi|118135635|ref|NC_006088.2chromosome1	79.12	819	150	11	337	1149	2762060	2762863	0	675	1	S
s_1_1_contig55369	gi|118135635|ref|NC_006088.2chromosome1	84.1	805	108	6	37	838	2764185	2764972	0	866	4	S
s_1_1_contig246475	gi|118135635|ref|NC_006088.2chromosome1	85.11	47	7	0	2	48	2765139	2765093	4e-05	54	639	M
s_1_1_contig198649	gi|118135635|ref|NC_006088.2chromosome1	80	60	5	2	414	471	2765148	2765094	0.0001	52	74	M
s_1_1_contig277551	gi|118135635|ref|NC_006088.2chromosome1	90.29	103	10	0	972	1074	2765012	2765114	2e-31	141	135	M
s_1_1_contig151178	gi|118135635|ref|NC_006088.2chromosome1	95.35	43	2	0	1248	1290	2765074	2765116	1e-09	70	6746	M
s_1_1_contig276402	gi|118135635|ref|NC_006088.2chromosome1	88	50	6	0	624	673	2765075	2765124	3e-08	64	2146	M
s_1_1_contig151399	gi|118135635|ref|NC_006088.2chromosome1	81.42	113	17	2	1658	1769	2765025	2765134	8e-20	104	3865	M
s_1_1_contig235475	gi|118135635|ref|NC_006088.2chromosome1	78.69	657	132	5	1229	1884	2771469	2772118	1e-150	538	2	S
s_1_1_contig266199	gi|118135635|ref|NC_006088.2chromosome1	71.35	1742	354	41	1556	3233	2775845	2774185	0	838	3754	M
s_1_1_contig182185	gi|118135635|ref|NC_006088.2chromosome1	72.64	614	127	10	257	863	2777553	2776974	2e-91	342	2	S
s_1_1_contig12248	gi|118135635|ref|NC_006088.2chromosome1	80.79	833	131	13	1824	2639	2780688	2779868	0	749	3	S
s_1_1_contig133507	gi|118135635|ref|NC_006088.2chromosome1	76.78	1641	315	16	907	2510	2784320	2785931	0	1229	2	S
s_1_1_contig223544	gi|118135635|ref|NC_006088.2chromosome1	69.7	1132	263	16	930	2013	2788324	2789423	3e-137	495	1	S
s_1_1_contig98441	gi|118135635|ref|NC_006088.2chromosome1	82.47	154	24	3	4123	4274	2794164	2794316	7e-32	145	237	M
s_1_1_contig96929	gi|118135635|ref|NC_006088.2chromosome1	71.47	2482	505	54	8564	10956	2801463	2803830	0	1223	62	M
s_1_1_contig179795	gi|118135635|ref|NC_006088.2chromosome1	71.58	1140	215	21	139	1225	2805674	2806757	4e-169	600	1	S
s_1_1_contig18124	gi|118135635|ref|NC_006088.2chromosome1	92.86	28	2	0	745	772	2809090	2809117	0.14	43	42	M
s_1_1_contig222978	gi|118135635|ref|NC_006088.2chromosome1	75.35	779	152	11	1338	2110	2808434	2809178	1e-146	526	1	S
s_1_1_contig219977	gi|118135635|ref|NC_006088.2chromosome1	83.63	397	42	8	3071	3450	2809944	2809554	3e-111	408	2	S
s_1_1_contig197889	gi|118135635|ref|NC_006088.2chromosome1	76.25	1575	285	31	1914	3452	2816060	2817581	0	1095	5	S
s_1_1_contig281755	gi|118135635|ref|NC_006088.2chromosome1	84.55	356	42	4	1	344	2824756	2825110	4e-106	389	1	S
s_1_1_contig220759	gi|118135635|ref|NC_006088.2chromosome1	68.9	1032	207	26	1195	2160	2826759	2825776	1e-108	399	1	S
s_1_1_contig135979	gi|118135635|ref|NC_006088.2chromosome1	73.75	1162	233	21	1386	2527	2829413	2828304	0	691	2	S
s_1_1_contig105696	gi|118135635|ref|NC_006088.2chromosome1	75.42	1558	259	29	1511	2993	2831781	2833289	0	1065	2	S
s_1_1_contig234145	gi|118135635|ref|NC_006088.2chromosome1	79.55	264	48	5	2454	2717	2839808	2840065	3e-53	215	1	S
s_1_1_contig111372	gi|118135635|ref|NC_006088.2chromosome1	72.69	1267	272	20	7444	8667	2841915	2840680	0	702	45	M
s_1_1_contig112291	gi|118135635|ref|NC_006088.2chromosome1	73.39	1721	347	26	109	1787	2863045	2861394	0	1021	7	S
s_1_1_contig165813	gi|118135635|ref|NC_006088.2chromosome1	73.49	298	50	3	882	1157	2863440	2863730	6e-47	194	1	S
s_1_1_contig155467	gi|118135635|ref|NC_006088.2chromosome1	83.89	453	71	2	1004	1455	2863824	2864275	3e-133	480	1	S
s_1_1_contig206474	gi|118135635|ref|NC_006088.2chromosome1	69.69	1112	218	17	317	1366	2864688	2865742	1e-143	517	3	S
s_1_1_contig226292	gi|118135635|ref|NC_006088.2chromosome1	71.07	197	53	3	202	397	2868756	2868949	8e-16	90	479	M
s_1_1_contig227337	gi|118135635|ref|NC_006088.2chromosome1	80.53	606	108	3	438	1034	2869002	2869606	3e-156	556	1	S
s_1_1_contig222318	gi|118135635|ref|NC_006088.2chromosome1	69.51	2512	569	58	530	2971	2870068	2872452	0	993	1	S
s_1_1_contig88144	gi|118135635|ref|NC_006088.2chromosome1	73.43	1276	237	22	2271	3484	2874080	2875315	0	765	3	S
s_1_1_contig100547	gi|118135635|ref|NC_006088.2chromosome1	69.16	3962	930	83	202	3985	2877046	2880893	0	1525	3	S
s_1_1_contig251553	gi|118135635|ref|NC_006088.2chromosome1	75.97	387	55	4	145	513	2885525	2885891	8e-78	295	1	S
s_1_1_contig74119	gi|118135635|ref|NC_006088.2chromosome1	72.25	746	128	20	1926	2636	2887692	2888393	7e-107	394	1	S
s_1_1_contig2703	gi|118135635|ref|NC_006088.2chromosome1	74.34	226	34	8	95	306	2891864	2891649	5e-29	132	1	S
s_1_1_contig130262	gi|118135635|ref|NC_006088.2chromosome1	70.78	1006	215	21	5795	6776	2895547	2894597	3e-128	466	3	S
s_1_1_contig18591	gi|118135635|ref|NC_006088.2chromosome1	74.9	729	135	6	3	685	2901140	2901866	9e-141	506	1	S
s_1_1_contig275215	gi|118135635|ref|NC_006088.2chromosome1	71.71	152	29	3	153	304	2904020	2904157	1e-12	81	874	M
s_1_1_contig76762	gi|118135635|ref|NC_006088.2chromosome1	74.45	3585	656	71	98	3538	2905281	2908749	0	2250	5	S
s_1_1_contig278639	gi|118135635|ref|NC_006088.2chromosome1	93.55	31	2	0	610	640	2917825	2917855	0.003	48	1438	M
s_1_1_contig263918	gi|118135635|ref|NC_006088.2chromosome1	68.09	1006	236	21	2879	3853	2920189	2919238	4e-93	349	2	S
s_1_1_contig229418	gi|118135635|ref|NC_006088.2chromosome1	74.1	417	77	9	200	598	2923243	2923646	4e-65	253	1	S
s_1_1_contig196178	gi|118135635|ref|NC_006088.2chromosome1	87.59	145	18	0	446	590	2924861	2925005	4e-43	181	1	S
s_1_1_contig277706	gi|118135635|ref|NC_006088.2chromosome1	67.34	542	109	18	28	555	2925937	2926424	5e-37	159	1	S
s_1_1_contig169967	gi|118135635|ref|NC_006088.2chromosome1	79.32	237	46	3	1449	1683	2927432	2927667	2e-47	196	1	S
s_1_1_contig85678	gi|118135635|ref|NC_006088.2chromosome1	71.73	757	137	21	2342	3063	2929778	2930492	2e-101	376	1	S
s_1_1_contig167613	gi|118135635|ref|NC_006088.2chromosome1	78.24	1011	135	19	1462	2462	2932581	2933516	0	823	1	S
s_1_1_contig120290	gi|118135635|ref|NC_006088.2chromosome1	79.86	2105	313	38	65	2104	2943317	2941259	0	1813	4	S
s_1_1_contig177699	gi|118135635|ref|NC_006088.2chromosome1	69.75	1881	330	43	98	1803	2943465	2945281	0	848	1	S
s_1_1_contig71095	gi|118135635|ref|NC_006088.2chromosome1	69.5	2161	527	56	4865	6966	2948295	2946208	0	792	4	S
s_1_1_contig221454	gi|118135635|ref|NC_006088.2chromosome1	76.38	940	166	20	113	1035	2954990	2954090	0	655	1	S
s_1_1_contig36111	gi|118135635|ref|NC_006088.2chromosome1	71.67	233	65	1	438	669	2958279	2958511	5e-25	120	9092	M
s_1_1_contig93152	gi|118135635|ref|NC_006088.2chromosome1	70.7	1983	411	52	3183	5101	2963648	2961772	0	875	6	S
s_1_1_contig215320	gi|118135635|ref|NC_006088.2chromosome1	74.21	760	163	13	868	1609	2968229	2968973	9e-127	459	1	S
s_1_1_contig108755	gi|118135635|ref|NC_006088.2chromosome1	74.36	1845	332	48	997	2788	2974972	2973216	0	1106	5	S
s_1_1_contig211040	gi|118135635|ref|NC_006088.2chromosome1	81.9	105	18	1	210	313	2976441	2976337	5e-19	100	23393	M
s_1_1_contig69653	gi|118135635|ref|NC_006088.2chromosome1	79.94	1087	174	13	3267	4326	2978813	2979882	0	958	27	M
s_1_1_contig229276	gi|118135635|ref|NC_006088.2chromosome1	77.06	776	130	9	69	810	2979894	2980655	6e-169	600	2	S
s_1_1_contig153638	gi|118135635|ref|NC_006088.2chromosome1	67.34	1197	282	24	101	1242	2982124	2983266	6e-105	387	1	S
s_1_1_contig222345	gi|118135635|ref|NC_006088.2chromosome1	74.94	423	70	12	70	485	2984444	2984051	2e-68	264	1	S
s_1_1_contig220748	gi|118135635|ref|NC_006088.2chromosome1	68.64	2210	479	56	36	2158	2984437	2986519	0	801	1	S
s_1_1_contig239064	gi|118135635|ref|NC_006088.2chromosome1	76.07	397	85	5	828	1221	2987374	2987763	2e-71	275	1	S
s_1_1_contig180839	gi|118135635|ref|NC_006088.2chromosome1	78.4	1153	199	19	351	1483	2991649	2990527	0	917	2	S
s_1_1_contig174225	gi|118135635|ref|NC_006088.2chromosome1	75.37	540	81	10	1627	2137	2993572	2993056	2e-101	376	2	S
s_1_1_contig239215	gi|118135635|ref|NC_006088.2chromosome1	69.18	1181	228	32	160	1249	2996466	2995331	1e-129	468	1	S
s_1_1_contig208700	gi|118135635|ref|NC_006088.2chromosome1	67.97	1764	384	51	303	1978	2996836	2998506	3e-159	567	1	S
s_1_1_contig112241	gi|118135635|ref|NC_006088.2chromosome1	72.93	1910	355	56	3077	4900	3002341	3004174	0	1007	3	S
s_1_1_contig85024	gi|118135635|ref|NC_006088.2chromosome1	70.42	5788	1114	167	656	6147	3011723	3006238	0	2506	1	S
s_1_1_contig280419	gi|118135635|ref|NC_006088.2chromosome1	79.1	67	12	1	367	433	3012715	3012651	1e-05	55	22	M
s_1_1_contig196559	gi|118135635|ref|NC_006088.2chromosome1	70.97	496	99	14	292	752	3013620	3014105	7e-56	223	1	S
s_1_1_contig253206	gi|118135635|ref|NC_006088.2chromosome1	78.36	268	55	2	26	293	3014512	3014248	4e-54	215	1	S
s_1_1_contig128615	gi|118135635|ref|NC_006088.2chromosome1	70.53	3906	707	108	56	3730	3014743	3018435	0	1768	2	S
s_1_1_contig121652	gi|118135635|ref|NC_006088.2chromosome1	69.68	1705	382	40	4711	6320	3022465	3020801	0	686	3	M
s_1_1_contig90391	gi|118135635|ref|NC_006088.2chromosome1	74.41	895	156	24	1132	1986	3028075	3028936	9e-151	540	2	S
s_1_1_contig244423	gi|118135635|ref|NC_006088.2chromosome1	67.5	557	128	12	997	1518	3031554	3032092	1e-43	183	13	M
s_1_1_contig276804	gi|118135635|ref|NC_006088.2chromosome1	73.8	374	81	9	48	414	3033310	3032947	8e-52	208	1	S
s_1_1_contig272124	gi|118135635|ref|NC_006088.2chromosome1	70.2	443	117	8	779	1219	3033958	3034387	3e-43	181	1	S
s_1_1_contig110049	gi|118135635|ref|NC_006088.2chromosome1	72.2	615	132	18	936	1539	3034975	3034389	8e-77	293	1	S
s_1_1_contig82476	gi|118135635|ref|NC_006088.2chromosome1	66.53	1476	307	41	2443	3813	3038778	3040171	2e-114	419	2	S
s_1_1_contig232122	gi|118135635|ref|NC_006088.2chromosome1	74.13	344	66	8	376	701	3043920	3044258	2e-50	205	1	S
s_1_1_contig95187	gi|118135635|ref|NC_006088.2chromosome1	75.93	1263	249	26	168	1393	3048633	3047389	0	839	4	S
s_1_1_contig103861	gi|118135635|ref|NC_006088.2chromosome1	75.48	1048	181	26	28	1039	3052576	3051569	0	682	5652	M
s_1_1_contig93251	gi|118135635|ref|NC_006088.2chromosome1	82.02	456	74	4	172	626	3052650	3053098	8e-122	443	2	S
s_1_1_contig76313	gi|118135635|ref|NC_006088.2chromosome1	83.55	693	104	8	6346	7035	3056726	3056041	0	710	4	S
s_1_1_contig38469	gi|118135635|ref|NC_006088.2chromosome1	69.26	462	102	17	564	1003	3063118	3062675	1e-34	152	1	S
s_1_1_contig160356	gi|118135635|ref|NC_006088.2chromosome1	81.69	213	17	3	2077	2280	3065425	3065226	4e-53	215	1	S
s_1_1_contig222243	gi|118135635|ref|NC_006088.2chromosome1	71.79	507	118	12	1090	1592	3069083	3069568	2e-60	239	1	S
s_1_1_contig55788	gi|118135635|ref|NC_006088.2chromosome1	73.88	513	114	9	57055	57554	3071619	3071114	7e-77	298	16	M
s_1_1_contig224656	gi|118135635|ref|NC_006088.2chromosome1	74.83	1049	197	23	59	1064	3072642	3071618	0	659	2	S
s_1_1_contig196580	gi|118135635|ref|NC_006088.2chromosome1	66.57	658	152	14	374	991	3073742	3074371	7e-47	194	231	M
s_1_1_contig244788	gi|118135635|ref|NC_006088.2chromosome1	78.71	263	55	1	263	525	3076257	3075996	8e-55	219	1	S
s_1_1_contig276920	gi|118135635|ref|NC_006088.2chromosome1	74.06	663	127	19	97	730	3077839	3078485	5e-102	376	1	S
s_1_1_contig158307	gi|118135635|ref|NC_006088.2chromosome1	72.84	1808	355	34	1693	3420	3080806	3082557	0	1016	5	M
s_1_1_contig44005	gi|118135635|ref|NC_006088.2chromosome1	74.93	379	87	3	372	742	3082993	3082615	4e-64	250	4	M
s_1_1_contig188428	gi|118135635|ref|NC_006088.2chromosome1	76.59	252	46	5	806	1046	3082906	3082657	3e-42	178	467	M
s_1_1_contig188649	gi|118135635|ref|NC_006088.2chromosome1	73.93	303	74	4	1012	1310	3082993	3082692	5e-42	178	394	M
s_1_1_contig196189	gi|118135635|ref|NC_006088.2chromosome1	78.15	302	65	1	75	376	3082993	3082693	5e-62	244	18	M
s_1_1_contig176187	gi|118135635|ref|NC_006088.2chromosome1	75.34	296	68	3	336	630	3082991	3082700	1e-47	196	2405	M
s_1_1_contig127583	gi|118135635|ref|NC_006088.2chromosome1	74.36	273	67	1	4847	5116	3082990	3082718	6e-41	176	725	M
s_1_1_contig250048	gi|118135635|ref|NC_006088.2chromosome1	76.31	249	53	3	338	580	3082993	3082745	5e-42	176	336	M
s_1_1_contig281175	gi|118135635|ref|NC_006088.2chromosome1	78.51	242	50	2	553	792	3082991	3082750	1e-47	196	994	M
s_1_1_contig47815	gi|118135635|ref|NC_006088.2chromosome1	76.19	231	44	6	19	240	3082993	3082765	5e-35	152	6	M
s_1_1_contig35840	gi|118135635|ref|NC_006088.2chromosome1	78.44	167	36	0	223	389	3082981	3082815	5e-31	140	11	M
s_1_1_contig238220	gi|118135635|ref|NC_006088.2chromosome1	80.28	142	27	1	700	840	3082992	3082851	3e-27	127	1	S
s_1_1_contig134783	gi|118135635|ref|NC_006088.2chromosome1	76.8	125	29	0	316	440	3082996	3082872	6e-17	95	19053	M
s_1_1_contig70671	gi|118135635|ref|NC_006088.2chromosome1	85.29	102	13	2	11683	11783	3082993	3082893	1e-20	109	12671	M
s_1_1_contig101711	gi|118135635|ref|NC_006088.2chromosome1	74.63	272	57	5	984	1244	3082718	3082988	4e-39	168	5	M
s_1_1_contig173242	gi|118135635|ref|NC_006088.2chromosome1	76.42	229	47	1	182	403	3082762	3082990	1e-40	172	516	M
s_1_1_contig191248	gi|118135635|ref|NC_006088.2chromosome1	76.47	119	28	0	904	1022	3082872	3082990	1e-15	90	13572	M
s_1_1_contig49805	gi|118135635|ref|NC_006088.2chromosome1	81.75	137	25	0	8981	9117	3082857	3082993	4e-28	134	15	M
s_1_1_contig116814	gi|118135635|ref|NC_006088.2chromosome1	75.21	234	58	0	1185	1418	3082760	3082993	5e-37	161	357	M
s_1_1_contig189436	gi|118135635|ref|NC_006088.2chromosome1	83.45	145	22	1	21	163	3082849	3082993	2e-34	150	8	M
s_1_1_contig257363	gi|118135635|ref|NC_006088.2chromosome1	75.83	240	58	0	185	424	3082754	3082993	5e-41	172	244	M
s_1_1_contig205539	gi|118135635|ref|NC_006088.2chromosome1	77.31	238	52	2	12	248	3082760	3082996	9e-43	179	1073	M
s_1_1_contig218948	gi|118135635|ref|NC_006088.2chromosome1	78.29	1110	174	17	1901	2983	3085954	3084885	0	899	2	S
s_1_1_contig245306	gi|118135635|ref|NC_006088.2chromosome1	77.7	538	92	9	185	701	3087882	3088412	1e-113	414	1	S
s_1_1_contig236806	gi|118135635|ref|NC_006088.2chromosome1	76.3	211	40	5	283	489	3090198	3090402	2e-31	141	18	M
s_1_1_contig38124	gi|118135635|ref|NC_006088.2chromosome1	75.53	237	48	6	262	495	3090200	3090429	7e-34	149	70	M
s_1_1_contig170829	gi|118135635|ref|NC_006088.2chromosome1	72.88	236	56	4	833	1064	3090198	3090429	4e-27	127	2	M
s_1_1_contig171185	gi|118135635|ref|NC_006088.2chromosome1	74.14	321	72	4	336	650	3090198	3090513	2e-48	197	2909	M
s_1_1_contig267372	gi|118135635|ref|NC_006088.2chromosome1	68.84	1348	278	24	1534	2775	3093190	3094501	4e-156	558	5	M
s_1_1_contig40021	gi|118135635|ref|NC_006088.2chromosome1	79.13	484	94	7	36	516	3097807	3097328	4e-107	392	1	S
s_1_1_contig225459	gi|118135635|ref|NC_006088.2chromosome1	74.54	652	112	19	46	664	3097805	3098435	2e-106	390	1	S
s_1_1_contig217398	gi|118135635|ref|NC_006088.2chromosome1	74.39	2624	451	54	159	2658	3101618	3099092	0	1658	1	S
s_1_1_contig238023	gi|118135635|ref|NC_006088.2chromosome1	76.62	834	162	13	709	1531	3102519	3101708	5e-168	596	1	S
s_1_1_contig91463	gi|118135635|ref|NC_006088.2chromosome1	75.09	1164	224	21	170	1302	3108295	3107167	0	756	4	S
s_1_1_contig120086	gi|118135635|ref|NC_006088.2chromosome1	74.47	2366	402	52	1953	4174	3111604	3109297	0	1492	1	S
s_1_1_contig78145	gi|118135635|ref|NC_006088.2chromosome1	73.15	1151	230	37	3386	4491	3118089	3116973	9e-165	587	1	S
s_1_1_contig84241	gi|118135635|ref|NC_006088.2chromosome1	73.21	825	148	16	1439	2223	3128331	3127540	3e-134	486	2	S
s_1_1_contig143684	gi|118135635|ref|NC_006088.2chromosome1	69.06	695	156	25	623	1310	3130273	3130915	5e-56	224	1	S
s_1_1_contig74463	gi|118135635|ref|NC_006088.2chromosome1	72.08	1096	224	26	4339	5393	3133953	3132899	6e-155	554	2	S
s_1_1_contig198849	gi|118135635|ref|NC_006088.2chromosome1	67.36	386	85	13	133	499	3138349	3137986	3e-21	107	349	M
s_1_1_contig219617	gi|118135635|ref|NC_006088.2chromosome1	75.71	210	30	5	1405	1596	3140099	3139893	3e-32	145	40	M
s_1_1_contig142946	gi|118135635|ref|NC_006088.2chromosome1	68.57	1015	195	35	1057	2014	3142989	3143936	1e-92	347	1	S
s_1_1_contig225705	gi|118135635|ref|NC_006088.2chromosome1	72.94	2395	457	67	463	2777	3148706	3150989	0	1269	1	S
s_1_1_contig195078	gi|118135635|ref|NC_006088.2chromosome1	65.25	423	114	8	1864	2260	3153347	3153762	6e-17	95	2568	M
s_1_1_contig147901	gi|118135635|ref|NC_006088.2chromosome1	66.48	910	212	21	1832	2686	3156447	3157318	4e-65	255	2	S
s_1_1_contig196461	gi|118135635|ref|NC_006088.2chromosome1	67.78	329	92	3	681	995	3158751	3159079	3e-23	114	31674	M
s_1_1_contig244230	gi|118135635|ref|NC_006088.2chromosome1	76.94	464	85	9	488	936	3163132	3162676	2e-89	334	1	S
s_1_1_contig185038	gi|118135635|ref|NC_006088.2chromosome1	73.19	470	86	10	76	516	3163805	3164263	1e-70	271	1	S
s_1_1_contig242969	gi|118135635|ref|NC_006088.2chromosome1	69.98	533	118	20	50	563	3164990	3164481	1e-45	188	1	S
s_1_1_contig230286	gi|118135635|ref|NC_006088.2chromosome1	71.57	598	121	16	810	1393	3165559	3166121	6e-74	284	1	S
s_1_1_contig148328	gi|118135635|ref|NC_006088.2chromosome1	74.88	637	119	10	2936	3545	3170618	3171240	2e-114	419	7	M
s_1_1_contig161606	gi|118135635|ref|NC_006088.2chromosome1	66.25	1692	413	39	1126	2731	3172471	3174090	3e-122	444	1	S
s_1_1_contig197047	gi|118135635|ref|NC_006088.2chromosome1	67.61	639	146	14	123	730	3174213	3174821	2e-52	212	7015	M
s_1_1_contig226090	gi|118135635|ref|NC_006088.2chromosome1	74.53	322	74	4	284	597	3175765	3176086	6e-49	201	2	S
s_1_1_contig261515	gi|118135635|ref|NC_006088.2chromosome1	69.52	502	110	12	2103	2588	3179263	3179737	6e-49	201	1	S
s_1_1_contig260535	gi|118135635|ref|NC_006088.2chromosome1	78.17	710	131	11	226	928	3183099	3182407	3e-155	554	1	S
s_1_1_contig99995	gi|118135635|ref|NC_006088.2chromosome1	67.58	4358	924	124	3968	8096	3187587	3191684	0	1371	2	S
s_1_1_contig227142	gi|118135635|ref|NC_006088.2chromosome1	73.26	1279	245	32	1452	2683	3194343	3195571	0	708	1	S
s_1_1_contig127539	gi|118135635|ref|NC_006088.2chromosome1	68.69	1482	315	39	2284	3677	3198561	3197141	1e-150	540	2	M
s_1_1_contig222504	gi|118135635|ref|NC_006088.2chromosome1	71.36	4556	883	128	554	4878	3201271	3205635	0	2136	1	S
s_1_1_contig227005	gi|118135635|ref|NC_006088.2chromosome1	70.1	970	196	28	64	968	3205716	3206656	2e-109	401	1	S
s_1_1_contig184753	gi|118135635|ref|NC_006088.2chromosome1	68.93	1632	350	47	89	1613	3207208	3208789	3e-165	587	1	S
s_1_1_contig215848	gi|118135635|ref|NC_006088.2chromosome1	69.48	1268	286	35	277	1503	3209952	3211159	2e-131	475	2	S
s_1_1_contig266152	gi|118135635|ref|NC_006088.2chromosome1	68.92	904	192	26	348	1213	3214428	3213576	4e-87	327	1	S
s_1_1_contig252119	gi|118135635|ref|NC_006088.2chromosome1	71.3	223	61	3	13	232	3215098	3215320	2e-20	104	11	M
s_1_1_contig215055	gi|118135635|ref|NC_006088.2chromosome1	73.78	1125	243	22	184	1271	3216944	3215835	0	646	1	S
s_1_1_contig23020	gi|118135635|ref|NC_006088.2chromosome1	69.88	644	146	18	166	769	3218762	3218127	1e-63	250	1	S
s_1_1_contig223370	gi|118135635|ref|NC_006088.2chromosome1	71.29	425	100	7	824	1238	3219541	3219953	3e-50	205	2	S
s_1_1_contig119857	gi|118135635|ref|NC_006088.2chromosome1	69.52	1880	372	53	1761	3542	3222687	3220911	0	749	2	S
s_1_1_contig217399	gi|118135635|ref|NC_006088.2chromosome1	71.29	533	137	7	78	601	3225625	3225100	1e-65	255	1	S
s_1_1_contig14615	gi|118135635|ref|NC_006088.2chromosome1	74.66	951	218	10	3	935	3226729	3225784	1e-170	605	6025	M
s_1_1_contig96392	gi|118135635|ref|NC_006088.2chromosome1	73.84	1334	296	15	1632	2921	3227133	3225809	0	812	6522	M
s_1_1_contig252254	gi|118135635|ref|NC_006088.2chromosome1	71.16	794	187	13	45	807	3226963	3226181	3e-103	379	1969	M
s_1_1_contig207441	gi|118135635|ref|NC_006088.2chromosome1	73.02	782	177	12	203	952	3225901	3226680	7e-120	435	3663	M
s_1_1_contig97767	gi|118135635|ref|NC_006088.2chromosome1	75.3	846	174	15	1	822	3226107	3226941	6e-153	547	4150	M
s_1_1_contig153134	gi|118135635|ref|NC_006088.2chromosome1	74.26	1212	266	20	1452	2621	3225782	3226989	0	731	6162	M
s_1_1_contig133458	gi|118135635|ref|NC_006088.2chromosome1	75.67	1044	217	11	3487	4502	3225972	3227006	0	722	6392	M
s_1_1_contig98954	gi|118135635|ref|NC_006088.2chromosome1	69.16	1391	331	25	467	1767	3225795	3227177	4e-154	551	3860	M
s_1_1_contig154797	gi|118135635|ref|NC_006088.2chromosome1	74.06	1253	257	17	1	1198	3225939	3227178	0	780	4426	M
s_1_1_contig184313	gi|118135635|ref|NC_006088.2chromosome1	73.67	490	116	10	92	576	3229005	3228524	5e-70	269	1	S
s_1_1_contig220185	gi|118135635|ref|NC_006088.2chromosome1	72.94	935	192	18	69	953	3231976	3231053	7e-145	520	515	M
s_1_1_contig123682	gi|118135635|ref|NC_006088.2chromosome1	67.89	2074	453	57	1759	3747	3236466	3234521	0	673	2	S
s_1_1_contig176050	gi|118135635|ref|NC_006088.2chromosome1	86.18	123	17	0	843	965	3238789	3238667	3e-32	145	88	M
s_1_1_contig275903	gi|118135635|ref|NC_006088.2chromosome1	83.81	105	13	3	539	641	3238800	3238698	3e-20	104	4120	M
s_1_1_contig197920	gi|118135635|ref|NC_006088.2chromosome1	86.96	46	6	0	840	885	3238799	3238754	5e-06	57	3939	M
s_1_1_contig250527	gi|118135635|ref|NC_006088.2chromosome1	85.56	90	11	2	1	89	3238721	3238809	3e-18	97	20898	M
s_1_1_contig94254	gi|118135635|ref|NC_006088.2chromosome1	68.65	488	100	15	809	1269	3238986	3239447	1e-39	170	1	S
s_1_1_contig81221	gi|118135635|ref|NC_006088.2chromosome1	71	569	120	16	606	1149	3242885	3243433	3e-64	251	2	S
s_1_1_contig193202	gi|118135635|ref|NC_006088.2chromosome1	67.71	638	134	18	1903	2507	3244948	3244350	2e-50	206	1	S
s_1_1_contig142743	gi|118135635|ref|NC_006088.2chromosome1	78.2	399	70	15	435	827	3249725	3249338	4e-71	275	1	S
s_1_1_contig37053	gi|118135635|ref|NC_006088.2chromosome1	66.92	659	146	20	103	732	3250753	3250138	2e-43	181	1	S
s_1_1_contig203762	gi|118135635|ref|NC_006088.2chromosome1	78.1	306	60	5	2174	2476	3251776	3251475	1e-58	233	1	S
s_1_1_contig142186	gi|118135635|ref|NC_006088.2chromosome1	69.92	1190	267	25	1249	2378	3259085	3260243	2e-139	502	2	S
s_1_1_contig276496	gi|118135635|ref|NC_006088.2chromosome1	70.18	855	181	17	303	1116	3265082	3264261	4e-104	383	1	S
s_1_1_contig253971	gi|118135635|ref|NC_006088.2chromosome1	79.69	128	26	0	548	675	3264550	3264423	2e-23	114	24	M
s_1_1_contig242145	gi|118135635|ref|NC_006088.2chromosome1	66.33	588	171	13	1	578	3266352	3265782	2e-29	134	27	M
s_1_1_contig211153	gi|118135635|ref|NC_006088.2chromosome1	70.5	322	76	5	534	849	3266878	3266570	4e-33	147	1	S
s_1_1_contig253638	gi|118135635|ref|NC_006088.2chromosome1	69.6	898	193	16	48	909	3266569	3267422	7e-106	389	1	S
s_1_1_contig146275	gi|118135635|ref|NC_006088.2chromosome1	65.35	1111	268	30	346	1385	3269689	3268625	2e-60	239	1	S
s_1_1_contig144238	gi|118135635|ref|NC_006088.2chromosome1	67.43	697	167	17	3	656	3271055	3270376	2e-52	212	1	S
s_1_1_contig253863	gi|118135635|ref|NC_006088.2chromosome1	80.95	84	16	0	274	357	3271302	3271385	5e-13	81	32	M
s_1_1_contig90271	gi|118135635|ref|NC_006088.2chromosome1	75.92	1225	214	16	5217	6375	3276699	3277908	0	881	4	S
s_1_1_contig166436	gi|118135635|ref|NC_006088.2chromosome1	70.23	1226	277	27	413	1610	3283246	3282081	6e-146	524	2	S
s_1_1_contig87202	gi|118135635|ref|NC_006088.2chromosome1	72.51	1404	262	30	4240	5610	3286726	3285414	0	769	4	S
s_1_1_contig95903	gi|118135635|ref|NC_006088.2chromosome1	74.54	1237	238	22	2756	3950	3294820	3296021	0	782	3	S
s_1_1_contig130791	gi|118135635|ref|NC_006088.2chromosome1	72.5	1829	326	43	2404	4109	3300488	3298714	0	996	2	S
s_1_1_contig232587	gi|118135635|ref|NC_006088.2chromosome1	72.87	586	103	15	573	1143	3303411	3302867	4e-86	324	1	S
s_1_1_contig241569	gi|118135635|ref|NC_006088.2chromosome1	69.17	665	161	16	281	921	3307295	3306651	9e-62	242	1	S
s_1_1_contig88457	gi|118135635|ref|NC_006088.2chromosome1	66.96	2818	582	72	238	2894	3307303	3309932	0	875	2	S
s_1_1_contig106488	gi|118135635|ref|NC_006088.2chromosome1	76.68	669	113	13	3630	4264	3316300	3315641	6e-134	484	3	S
s_1_1_contig22488	gi|118135635|ref|NC_006088.2chromosome1	76.85	527	96	12	390	898	3320664	3320146	2e-100	370	1	S
s_1_1_contig124515	gi|118135635|ref|NC_006088.2chromosome1	71.49	649	138	13	178	791	3320727	3321363	1e-84	320	2	S
s_1_1_contig264435	gi|118135635|ref|NC_006088.2chromosome1	73.41	504	99	10	1443	1925	3324809	3325298	5e-76	291	1	S
s_1_1_contig121166	gi|118135635|ref|NC_006088.2chromosome1	68.57	964	209	25	115	1021	3328710	3327784	4e-92	345	109	M
s_1_1_contig282812	gi|118135635|ref|NC_006088.2chromosome1	87.88	33	4	0	200	232	3329309	3329341	0.075	43	19	M
s_1_1_contig234943	gi|118135635|ref|NC_006088.2chromosome1	71.11	1021	179	24	90	1080	3331233	3332167	2e-141	508	4	S
s_1_1_contig171488	gi|118135635|ref|NC_006088.2chromosome1	68.64	1693	296	59	398	1944	3335036	3333433	1e-170	605	1	S
s_1_1_contig263569	gi|118135635|ref|NC_006088.2chromosome1	74.42	903	153	25	46	918	3336397	3335543	7e-153	545	1	S
s_1_1_contig91562	gi|118135635|ref|NC_006088.2chromosome1	80.34	1175	180	20	7541	8678	3338591	3337431	0	1034	6	S
s_1_1_contig225521	gi|118135635|ref|NC_006088.2chromosome1	68.6	1140	223	33	96	1125	3353296	3354410	1e-113	416	1	S
s_1_1_contig275061	gi|118135635|ref|NC_006088.2chromosome1	84.44	45	5	1	1	45	3358737	3358779	0.003	48	240	M
s_1_1_contig142257	gi|118135635|ref|NC_006088.2chromosome1	66.97	651	156	14	633	1237	3359419	3358782	3e-47	196	2	S
s_1_1_contig121294	gi|118135635|ref|NC_006088.2chromosome1	69.03	649	164	17	2035	2670	3360749	3360125	7e-55	221	3	S
s_1_1_contig108525	gi|118135635|ref|NC_006088.2chromosome1	90.91	55	5	0	2689	2743	3361931	3361877	2e-11	77	18624	M
s_1_1_contig219160	gi|118135635|ref|NC_006088.2chromosome1	70.16	697	143	22	2598	3260	3367504	3366839	7e-72	279	1	S
s_1_1_contig197122	gi|118135635|ref|NC_006088.2chromosome1	76.47	357	62	7	314	668	3369764	3370100	3e-65	253	1	S
s_1_1_contig242982	gi|118135635|ref|NC_006088.2chromosome1	87.1	62	6	1	508	569	3373176	3373117	6e-11	73	10658	M
s_1_1_contig248729	gi|118135635|ref|NC_006088.2chromosome1	81.77	203	26	2	144	336	3375990	3376191	1e-49	201	1	S
s_1_1_contig71689	gi|118135635|ref|NC_006088.2chromosome1	70.77	1786	342	54	9516	11192	3397283	3395569	0	787	60	M
s_1_1_contig112604	gi|118135635|ref|NC_006088.2chromosome1	82.61	138	24	0	641	778	3396456	3396319	5e-31	141	3	M
s_1_1_contig251875	gi|118135635|ref|NC_006088.2chromosome1	77.24	123	23	1	453	570	3416867	3416745	4e-18	97	190	M
s_1_1_contig141729	gi|118135635|ref|NC_006088.2chromosome1	73.49	909	140	15	4153	4996	3419241	3418369	2e-161	576	6	S
s_1_1_contig91220	gi|118135635|ref|NC_006088.2chromosome1	74.56	1030	179	22	1730	2744	3425430	3424469	0	652	2	S
s_1_1_contig166351	gi|118135635|ref|NC_006088.2chromosome1	68.8	1221	293	32	337	1513	3427197	3428373	7e-115	419	1	S
s_1_1_contig150451	gi|118135635|ref|NC_006088.2chromosome1	88.46	52	5	1	1599	1649	3429361	3429412	7e-08	64	23274	M
s_1_1_contig160923	gi|118135635|ref|NC_006088.2chromosome1	71.88	1074	206	27	1852	2903	3439445	3440444	7e-151	540	2	M
s_1_1_contig249275	gi|118135635|ref|NC_006088.2chromosome1	71.89	370	84	4	133	483	3441957	3441589	4e-49	199	1	S
s_1_1_contig99495	gi|118135635|ref|NC_006088.2chromosome1	70.8	791	171	13	1372	2131	3446024	3445263	5e-103	381	1	S
s_1_1_contig217252	gi|118135635|ref|NC_006088.2chromosome1	86.57	67	6	3	1727	1791	3451002	3450937	2e-09	70	8974	M
s_1_1_contig63752	gi|118135635|ref|NC_006088.2chromosome1	71.93	791	175	13	195	960	3451755	3450987	2e-111	410	10	M
s_1_1_contig105453	gi|118135635|ref|NC_006088.2chromosome1	72.74	1064	204	24	2200	3194	3452846	3451800	2e-163	581	2	S
s_1_1_contig105634	gi|118135635|ref|NC_006088.2chromosome1	71.81	603	126	11	1015	1581	3457367	3456773	6e-82	311	1	S
s_1_1_contig226002	gi|118135635|ref|NC_006088.2chromosome1	82.59	402	57	3	880	1276	3459155	3459548	3e-111	408	3	S
s_1_1_contig273937	gi|118135635|ref|NC_006088.2chromosome1	70.19	1409	296	38	15	1370	3462408	3461071	6e-166	589	1	S
s_1_1_contig273327	gi|118135635|ref|NC_006088.2chromosome1	90.91	44	4	0	828	871	3462691	3462734	1e-07	63	700	M
s_1_1_contig3031	gi|118135635|ref|NC_006088.2chromosome1	72.56	1137	220	16	7251	8316	3473151	3474266	0	655	48	M
s_1_1_contig163476	gi|118135635|ref|NC_006088.2chromosome1	76.22	1064	177	29	4741	5770	3477673	3476652	0	717	4	S
s_1_1_contig99186	gi|118135635|ref|NC_006088.2chromosome1	83.61	476	56	6	940	1406	3483374	3483836	1e-138	500	13	M
s_1_1_contig89741	gi|118135635|ref|NC_006088.2chromosome1	71.55	710	160	9	130	804	3487065	3486363	5e-99	367	105	M
s_1_1_contig245557	gi|118135635|ref|NC_006088.2chromosome1	74.98	1147	257	11	27	1148	3487527	3486386	0	753	3735	M
s_1_1_contig276687	gi|118135635|ref|NC_006088.2chromosome1	71.61	1046	245	12	41	1039	3487554	3486514	4e-151	540	1260	M
s_1_1_contig146883	gi|118135635|ref|NC_006088.2chromosome1	76.61	248	49	4	201	440	3486831	3486585	2e-41	176	289	M
s_1_1_contig124282	gi|118135635|ref|NC_006088.2chromosome1	72.03	1069	268	12	75	1123	3487648	3486591	1e-154	554	3837	M
s_1_1_contig156964	gi|118135635|ref|NC_006088.2chromosome1	71.7	1297	325	17	1330	2595	3487880	3486595	0	646	2402	M
s_1_1_contig67983	gi|118135635|ref|NC_006088.2chromosome1	73.72	685	146	10	1156	1809	3487557	3486876	1e-111	410	271	M
s_1_1_contig241129	gi|118135635|ref|NC_006088.2chromosome1	69.72	885	204	12	10	840	3487796	3486922	6e-107	392	1905	M
s_1_1_contig24905	gi|118135635|ref|NC_006088.2chromosome1	70.94	764	205	8	231	980	3486531	3487291	8e-96	356	413	M
s_1_1_contig250650	gi|118135635|ref|NC_006088.2chromosome1	75.98	383	86	4	470	847	3487070	3487451	2e-68	264	266	M
s_1_1_contig15027	gi|118135635|ref|NC_006088.2chromosome1	74.32	74	17	1	483	554	3487531	3487458	0.018	46	94	M
s_1_1_contig238098	gi|118135635|ref|NC_006088.2chromosome1	73.9	567	131	4	449	998	3486933	3487499	7e-95	352	1334	M
s_1_1_contig272851	gi|118135635|ref|NC_006088.2chromosome1	75.34	580	125	10	1000	1573	3486933	3487500	1e-100	372	2523	M
s_1_1_contig46917	gi|118135635|ref|NC_006088.2chromosome1	73.68	737	178	11	186	911	3486770	3487501	4e-115	419	1539	M
s_1_1_contig97816	gi|118135635|ref|NC_006088.2chromosome1	74.4	797	179	9	5090	5869	3486864	3487652	1e-138	500	4997	M
s_1_1_contig141607	gi|118135635|ref|NC_006088.2chromosome1	69.61	1359	314	22	355	1675	3486426	3487723	4e-163	580	2311	M
s_1_1_contig22391	gi|118135635|ref|NC_006088.2chromosome1	69.97	1312	331	15	976	2230	3486548	3487853	5e-163	580	1572	M
s_1_1_contig195906	gi|118135635|ref|NC_006088.2chromosome1	68.43	643	141	12	696	1305	3494385	3493772	8e-63	246	1	S
s_1_1_contig205305	gi|118135635|ref|NC_006088.2chromosome1	68.66	922	183	28	14	882	3495948	3496816	9e-88	329	1	S
s_1_1_contig246120	gi|118135635|ref|NC_006088.2chromosome1	75.9	913	168	16	338	1220	3497929	3497039	2e-178	630	1	S
s_1_1_contig201134	gi|118135635|ref|NC_006088.2chromosome1	78.47	288	32	9	646	904	3499010	3498724	5e-57	226	1	S
s_1_1_contig89534	gi|118135635|ref|NC_006088.2chromosome1	73.59	1401	269	24	3729	5058	3505355	3503985	0	841	4	S
s_1_1_contig243726	gi|118135635|ref|NC_006088.2chromosome1	90.74	54	5	0	3	56	3512189	3512136	2e-11	75	9970	M
s_1_1_contig238575	gi|118135635|ref|NC_006088.2chromosome1	90.38	52	5	0	1015	1066	3512137	3512188	3e-10	72	4974	M
s_1_1_contig150906	gi|118135635|ref|NC_006088.2chromosome1	92.59	54	4	0	1103	1156	3512136	3512189	6e-13	81	13387	M
s_1_1_contig239974	gi|118135635|ref|NC_006088.2chromosome1	73.68	722	139	10	1601	2291	3513058	3513759	8e-123	446	1	S
s_1_1_contig230325	gi|118135635|ref|NC_006088.2chromosome1	77.79	815	154	13	2758	3557	3516267	3517069	1e-174	619	3	S
s_1_1_contig154701	gi|118135635|ref|NC_006088.2chromosome1	68.05	3762	805	80	931	4495	3523179	3519618	0	1362	3	S
s_1_1_contig146329	gi|118135635|ref|NC_006088.2chromosome1	71.1	1550	270	36	287	1696	3524886	3526397	0	774	1	S
s_1_1_contig35613	gi|118135635|ref|NC_006088.2chromosome1	74.77	535	100	7	811	1330	3527113	3526599	6e-96	356	2	S
s_1_1_contig170178	gi|118135635|ref|NC_006088.2chromosome1	73.41	692	138	12	116	776	3529592	3528916	7e-111	407	1	S
s_1_1_contig98760	gi|118135635|ref|NC_006088.2chromosome1	76.34	131	25	3	1957	2081	3530707	3530577	4e-15	90	4045	M
s_1_1_contig246594	gi|118135635|ref|NC_006088.2chromosome1	80	80	16	0	703	782	3530567	3530646	6e-11	73	2652	M
s_1_1_contig196164	gi|118135635|ref|NC_006088.2chromosome1	86.84	38	5	0	231	268	3533743	3533780	0.01	46	135	M
s_1_1_contig183288	gi|118135635|ref|NC_006088.2chromosome1	84.62	78	11	1	1084	1160	3535597	3535520	5e-14	84	5665	M
s_1_1_contig148340	gi|118135635|ref|NC_006088.2chromosome1	75.06	1355	270	30	1574	2882	3536470	3537802	0	847	5	S
s_1_1_contig191165	gi|118135635|ref|NC_006088.2chromosome1	72.13	1087	254	17	1485	2549	3539263	3540322	2e-157	562	3	S
s_1_1_contig197119	gi|118135635|ref|NC_006088.2chromosome1	74.09	687	139	9	19	679	3541474	3540801	1e-118	432	1	S
s_1_1_contig112781	gi|118135635|ref|NC_006088.2chromosome1	77.32	732	116	10	3	697	3541569	3542287	2e-160	572	4	S
s_1_1_contig145411	gi|118135635|ref|NC_006088.2chromosome1	78.71	1484	249	22	4424	5866	3551699	3550242	0	1213	5	S
s_1_1_contig244665	gi|118135635|ref|NC_006088.2chromosome1	76.9	277	55	8	38	307	3553863	3553589	4e-44	183	1306	M
s_1_1_contig154981	gi|118135635|ref|NC_006088.2chromosome1	78.24	193	42	0	1137	1329	3558229	3558037	2e-36	159	127	M
s_1_1_contig46241	gi|118135635|ref|NC_006088.2chromosome1	70.89	316	69	4	83	381	3561861	3561552	2e-36	158	2	S
s_1_1_contig145567	gi|118135635|ref|NC_006088.2chromosome1	68.22	1715	373	43	1363	2983	3564193	3562557	3e-168	598	1	S
s_1_1_contig208018	gi|118135635|ref|NC_006088.2chromosome1	71.45	592	106	11	381	944	3567129	3566573	8e-83	313	1	S
s_1_1_contig143925	gi|118135635|ref|NC_006088.2chromosome1	71.73	909	164	23	2312	3145	3576833	3575943	6e-127	461	1	S
s_1_1_contig27344	gi|118135635|ref|NC_006088.2chromosome1	78.32	143	23	3	1068	1202	3577813	3577671	1e-22	113	41838	M
s_1_1_contig60082	gi|118135635|ref|NC_006088.2chromosome1	77.84	167	26	5	2130	2287	3577852	3578016	7e-25	122	13026	M
s_1_1_contig146371	gi|118135635|ref|NC_006088.2chromosome1	74.37	1104	178	23	1487	2512	3580318	3579242	0	706	1	S
s_1_1_contig242815	gi|118135635|ref|NC_006088.2chromosome1	75.92	436	85	6	413	844	3584471	3584890	3e-80	304	2	S
s_1_1_contig189624	gi|118135635|ref|NC_006088.2chromosome1	74.71	779	146	16	1	752	3590085	3589331	2e-136	491	3	S
s_1_1_contig150232	gi|118135635|ref|NC_006088.2chromosome1	71.56	735	148	23	1505	2200	3592428	3591716	5e-89	334	2	S
s_1_1_contig145676	gi|118135635|ref|NC_006088.2chromosome1	68.56	668	158	15	1235	1874	3599990	3600633	6e-60	237	4	S
s_1_1_contig197162	gi|118135635|ref|NC_006088.2chromosome1	78.15	563	99	8	1	540	3601375	3600814	2e-123	446	2	S
s_1_1_contig243673	gi|118135635|ref|NC_006088.2chromosome1	72.39	373	95	3	1	368	3601402	3601771	4e-50	203	18	M
s_1_1_contig146959	gi|118135635|ref|NC_006088.2chromosome1	74.4	629	123	13	1906	2523	3602904	3603505	3e-104	385	36	M
s_1_1_contig146548	gi|118135635|ref|NC_006088.2chromosome1	70.91	887	206	17	190	1055	3606778	3605923	8e-111	407	2	S
s_1_1_contig160500	gi|118135635|ref|NC_006088.2chromosome1	70.78	1646	377	34	5866	7469	3612599	3611016	0	740	9	S
s_1_1_contig245924	gi|118135635|ref|NC_006088.2chromosome1	79.83	595	99	7	604	1188	3623058	3622475	2e-145	520	1	S
s_1_1_contig196946	gi|118135635|ref|NC_006088.2chromosome1	75.56	180	31	3	564	735	3623539	3623713	2e-26	125	2	S
s_1_1_contig205811	gi|118135635|ref|NC_006088.2chromosome1	75.11	229	53	3	769	993	3624396	3624168	6e-33	147	1	S
s_1_1_contig166867	gi|118135635|ref|NC_006088.2chromosome1	75.99	1083	190	17	465	1500	3626374	3627433	0	767	2	S
s_1_1_contig197188	gi|118135635|ref|NC_006088.2chromosome1	72.09	799	189	11	322	1098	3630461	3629675	3e-114	417	1	S
s_1_1_contig150727	gi|118135635|ref|NC_006088.2chromosome1	74.6	803	148	16	214	1006	3635401	3634645	4e-141	508	3	S
s_1_1_contig203413	gi|118135635|ref|NC_006088.2chromosome1	72.21	2303	471	51	1357	3563	3637803	3635574	0	1191	1	S
s_1_1_contig39607	gi|118135635|ref|NC_006088.2chromosome1	71.88	1650	343	37	9	1601	3640129	3638544	0	827	2	S
s_1_1_contig11390	gi|118135635|ref|NC_006088.2chromosome1	72.43	1342	275	20	14	1283	3645720	3644402	0	747	2	S
s_1_1_contig207797	gi|118135635|ref|NC_006088.2chromosome1	77.53	89	20	0	371	459	3646145	3646233	2e-10	72	14	M
s_1_1_contig107429	gi|118135635|ref|NC_006088.2chromosome1	77.69	650	122	10	3594	4233	3648607	3647971	4e-137	495	3	S
s_1_1_contig24639	gi|118135635|ref|NC_006088.2chromosome1	82.5	40	7	0	179	218	3652262	3652223	0.39	41	16	M
s_1_1_contig38644	gi|118135635|ref|NC_006088.2chromosome1	96.43	28	1	0	724	751	3654436	3654463	0.015	46	26	M
s_1_1_contig255266	gi|118135635|ref|NC_006088.2chromosome1	77.92	154	30	4	528	677	3656038	3656191	2e-22	111	50921	M
s_1_1_contig189278	gi|118135635|ref|NC_006088.2chromosome1	73.89	1168	237	21	1	1115	3657450	3656298	0	699	1	S
s_1_1_contig149202	gi|118135635|ref|NC_006088.2chromosome1	71.4	451	104	13	1541	1988	3658627	3658199	2e-47	196	3	S
s_1_1_contig199795	gi|118135635|ref|NC_006088.2chromosome1	70.6	636	131	16	1307	1911	3663140	3662530	2e-73	282	1	S
s_1_1_contig208354	gi|118135635|ref|NC_006088.2chromosome1	70.19	718	165	17	33	723	3664588	3663893	8e-79	298	1	S
s_1_1_contig202646	gi|118135635|ref|NC_006088.2chromosome1	65.56	421	77	10	1	409	3664649	3665013	8e-26	122	91	M
s_1_1_contig150973	gi|118135635|ref|NC_006088.2chromosome1	71.34	1106	255	17	44	1111	3665299	3666380	1e-152	545	2	S
s_1_1_contig145684	gi|118135635|ref|NC_006088.2chromosome1	72.97	1010	180	24	1246	2180	3669792	3668801	4e-159	567	1	S
s_1_1_contig147848	gi|118135635|ref|NC_006088.2chromosome1	70.89	2762	569	47	229	2933	3674146	3671563	0	1357	2	S
s_1_1_contig34423	gi|118135635|ref|NC_006088.2chromosome1	73.1	342	87	5	242	580	3674166	3674505	1e-44	185	1	S
s_1_1_contig185388	gi|118135635|ref|NC_006088.2chromosome1	66.74	938	232	24	62	981	3674537	3675412	5e-64	250	1	S
s_1_1_contig252296	gi|118135635|ref|NC_006088.2chromosome1	76.15	109	23	3	333	439	3675819	3675926	5e-10	70	132	M
s_1_1_contig275603	gi|118135635|ref|NC_006088.2chromosome1	72.32	979	185	22	8	954	3676851	3675927	5e-146	522	1	S
s_1_1_contig146890	gi|118135635|ref|NC_006088.2chromosome1	71.71	1375	240	26	781	2081	3681515	3680216	0	744	2	S
s_1_1_contig35772	gi|118135635|ref|NC_006088.2chromosome1	73.54	1047	192	17	50	1027	3684851	3683821	0	639	2	S
s_1_1_contig174498	gi|118135635|ref|NC_006088.2chromosome1	88.89	36	4	0	1986	2021	3685190	3685225	0.007	48	136	M
s_1_1_contig272990	gi|118135635|ref|NC_006088.2chromosome1	83.06	496	80	2	216	711	3688027	3688518	1e-142	511	1	S
s_1_1_contig17513	gi|118135635|ref|NC_006088.2chromosome1	80.49	948	154	10	2354	3284	3690154	3691087	0	859	2	S
s_1_1_contig189158	gi|118135635|ref|NC_006088.2chromosome1	74.31	109	25	1	14	119	3693257	3693149	9e-10	70	47	M
s_1_1_contig212037	gi|118135635|ref|NC_006088.2chromosome1	69.13	554	114	10	96	610	3694365	3693830	1e-59	235	49	M
s_1_1_contig278847	gi|118135635|ref|NC_006088.2chromosome1	78.8	552	110	6	362	908	3694667	3695216	1e-123	448	1	S
s_1_1_contig249886	gi|118135635|ref|NC_006088.2chromosome1	70.56	968	215	19	80	1024	3697193	3698113	7e-121	439	1	S
s_1_1_contig150878	gi|118135635|ref|NC_006088.2chromosome1	73.41	925	202	18	25	921	3698566	3699474	1e-144	518	1	S
s_1_1_contig37514	gi|118135635|ref|NC_006088.2chromosome1	79.05	463	78	3	169	614	3701815	3701355	8e-110	401	1	S
s_1_1_contig166950	gi|118135635|ref|NC_006088.2chromosome1	73.4	1267	203	28	1	1202	3704590	3703393	0	760	2	S
s_1_1_contig37591	gi|118135635|ref|NC_006088.2chromosome1	69.17	360	91	6	324	674	3704919	3704571	4e-31	140	1	S
s_1_1_contig242166	gi|118135635|ref|NC_006088.2chromosome1	70.63	589	135	13	576	1142	3705306	3705878	1e-66	259	1	S
s_1_1_contig90178	gi|118135635|ref|NC_006088.2chromosome1	76.3	1266	225	31	26	1247	3705881	3707115	0	859	1	S
s_1_1_contig197477	gi|118135635|ref|NC_006088.2chromosome1	72.26	739	168	9	84	815	3709317	3710025	1e-109	401	1	S
s_1_1_contig145999	gi|118135635|ref|NC_006088.2chromosome1	75.29	1732	323	35	471	2146	3710122	3711804	0	1131	4	M
s_1_1_contig181483	gi|118135635|ref|NC_006088.2chromosome1	77.4	668	125	8	551	1209	3720609	3719959	2e-142	511	2	S
s_1_1_contig190707	gi|118135635|ref|NC_006088.2chromosome1	85.34	682	87	7	256	925	3722457	3721777	0	760	1	S
s_1_1_contig36348	gi|118135635|ref|NC_006088.2chromosome1	75.61	246	57	3	971	1215	3723206	3722963	8e-38	163	1	S
s_1_1_contig35831	gi|118135635|ref|NC_006088.2chromosome1	75.97	949	160	14	15	942	3729264	3728363	0	682	2	S
s_1_1_contig190876	gi|118135635|ref|NC_006088.2chromosome1	74.25	668	107	9	614	1230	3730695	3730042	1e-123	448	1	S
s_1_1_contig42404	gi|118135635|ref|NC_006088.2chromosome1	66.03	468	90	9	1	464	3732445	3732043	7e-34	149	15771	M
s_1_1_contig36343	gi|118135635|ref|NC_006088.2chromosome1	71.29	937	198	19	1	907	3733269	3732374	6e-126	455	1	S
s_1_1_contig149189	gi|118135635|ref|NC_006088.2chromosome1	77.07	990	186	12	4	982	3737594	3736635	0	746	3	S
s_1_1_contig172323	gi|118135635|ref|NC_006088.2chromosome1	68.87	758	149	22	44	741	3737667	3738397	7e-74	282	1	S
s_1_1_contig169713	gi|118135635|ref|NC_006088.2chromosome1	84.3	344	49	2	1	342	3743580	3743920	1e-100	372	2	S
s_1_1_contig48458	gi|118135635|ref|NC_006088.2chromosome1	75.47	640	121	8	1	630	3747216	3746603	3e-122	443	1	S
s_1_1_contig130243	gi|118135635|ref|NC_006088.2chromosome1	76.08	2082	372	34	192	2227	3747537	3749538	0	1471	1	S
s_1_1_contig185230	gi|118135635|ref|NC_006088.2chromosome1	70.35	1130	235	28	106	1184	3749592	3750672	1e-136	491	1	S
s_1_1_contig187537	gi|118135635|ref|NC_006088.2chromosome1	77.05	1503	266	20	192	1646	3752869	3754340	0	1137	1	S
s_1_1_contig150539	gi|118135635|ref|NC_006088.2chromosome1	75.05	1070	192	15	1	1054	3756457	3755447	0	726	1	S
s_1_1_contig173131	gi|118135635|ref|NC_006088.2chromosome1	78.69	61	10	2	795	854	3758710	3758768	0.018	46	105	M
s_1_1_contig111823	gi|118135635|ref|NC_006088.2chromosome1	78.58	607	104	7	589	1180	3759686	3759091	6e-139	500	3	S
s_1_1_contig27958	gi|118135635|ref|NC_006088.2chromosome1	74.12	514	92	14	458	951	3762462	3761970	1e-79	302	1	S
s_1_1_contig34819	gi|118135635|ref|NC_006088.2chromosome1	71.36	803	167	21	271	1028	3763262	3764046	2e-101	374	1	S
s_1_1_contig41540	gi|118135635|ref|NC_006088.2chromosome1	72.97	407	92	9	10	413	3763899	3764290	3e-53	214	1	S
s_1_1_contig149988	gi|118135635|ref|NC_006088.2chromosome1	74.17	240	46	3	2674	2910	3766185	3765959	9e-35	154	2	S
s_1_1_contig189340	gi|118135635|ref|NC_006088.2chromosome1	68.82	680	188	11	77	743	3773231	3772563	1e-61	242	5	S
s_1_1_contig147591	gi|118135635|ref|NC_006088.2chromosome1	80.35	1140	186	17	3924	5035	3781049	3782178	0	1003	3	S
s_1_1_contig207035	gi|118135635|ref|NC_006088.2chromosome1	69.27	628	135	13	37	619	3783410	3784024	2e-66	257	1	S
s_1_1_contig243007	gi|118135635|ref|NC_006088.2chromosome1	68.45	897	203	24	435	1303	3785244	3784400	1e-80	306	2	S
s_1_1_contig250928	gi|118135635|ref|NC_006088.2chromosome1	96.67	30	0	1	666	694	3788568	3788539	0.008	46	43	M
s_1_1_contig99911	gi|118135635|ref|NC_006088.2chromosome1	73.84	3215	583	67	23	3132	3794202	3791141	0	1938	4	S
s_1_1_contig63129	gi|118135635|ref|NC_006088.2chromosome1	70.28	1366	281	29	1452	2758	3797463	3796164	1e-173	616	1	S
s_1_1_contig204655	gi|118135635|ref|NC_006088.2chromosome1	78.39	833	153	9	44	865	3803779	3802963	0	675	3	S
s_1_1_contig228912	gi|118135635|ref|NC_006088.2chromosome1	75.45	1446	292	23	542	1963	3806201	3804795	0	960	2	S
s_1_1_contig277204	gi|118135635|ref|NC_006088.2chromosome1	75.82	368	75	6	323	679	3810471	3810835	1e-63	248	1	S
s_1_1_contig190772	gi|118135635|ref|NC_006088.2chromosome1	70.28	636	146	14	1	627	3810763	3811364	9e-71	271	1	S
s_1_1_contig244846	gi|118135635|ref|NC_006088.2chromosome1	68.82	372	77	10	321	686	3811450	3811788	2e-30	138	38	M
s_1_1_contig217943	gi|118135635|ref|NC_006088.2chromosome1	73.79	912	199	15	233	1124	3813686	3812795	6e-150	536	1	S
s_1_1_contig148146	gi|118135635|ref|NC_006088.2chromosome1	81.4	785	108	10	90	860	3813841	3814601	0	747	2	S
s_1_1_contig145469	gi|118135635|ref|NC_006088.2chromosome1	76.73	1981	375	31	23	1956	3817902	3819843	0	1433	5	S
s_1_1_contig42294	gi|118135635|ref|NC_006088.2chromosome1	75.33	608	126	10	31	619	3825930	3826532	1e-108	398	1	S
s_1_1_contig117179	gi|118135635|ref|NC_006088.2chromosome1	71.86	5227	1064	90	2211	7257	3829318	3834317	0	2756	4	S
s_1_1_contig148934	gi|118135635|ref|NC_006088.2chromosome1	83.78	296	32	1	451	730	3838423	3838128	6e-87	327	1	S
s_1_1_contig115668	gi|118135635|ref|NC_006088.2chromosome1	71.76	2833	629	42	5497	8252	3845321	3848059	0	1467	5	S
s_1_1_contig187471	gi|118135635|ref|NC_006088.2chromosome1	68.96	596	118	17	296	848	3849148	3849719	2e-56	224	2	S
s_1_1_contig243401	gi|118135635|ref|NC_006088.2chromosome1	67.83	659	162	15	6	622	3850414	3849764	3e-52	210	1	S
s_1_1_contig187163	gi|118135635|ref|NC_006088.2chromosome1	71.56	1157	232	23	14	1127	3850455	3851557	2e-165	587	1	S
s_1_1_contig148023	gi|118135635|ref|NC_006088.2chromosome1	73.68	931	164	23	28	897	3852913	3852003	3e-152	544	1	S
s_1_1_contig189154	gi|118135635|ref|NC_006088.2chromosome1	64.43	686	151	23	2	644	3853848	3853213	2e-24	118	11642	M
s_1_1_contig21364	gi|118135635|ref|NC_006088.2chromosome1	87.16	623	64	6	1978	2597	3855237	3855846	0	751	2	S
s_1_1_contig207946	gi|118135635|ref|NC_006088.2chromosome1	71.79	1042	193	19	3	1010	3856897	3855923	2e-157	560	1	S
s_1_1_contig150537	gi|118135635|ref|NC_006088.2chromosome1	72.34	1052	215	19	2	1013	3856877	3857892	6e-160	569	1	S
s_1_1_contig130835	gi|118135635|ref|NC_006088.2chromosome1	74.6	1606	271	41	13	1571	3861904	3863419	0	996	3	S
s_1_1_contig150482	gi|118135635|ref|NC_006088.2chromosome1	72.61	909	170	14	366	1248	3866960	3867815	1e-146	526	1	S
s_1_1_contig184981	gi|118135635|ref|NC_006088.2chromosome1	73.8	439	87	9	627	1045	3869679	3870109	1e-66	259	1	S
s_1_1_contig45553	gi|118135635|ref|NC_006088.2chromosome1	93.1	29	2	0	853	881	3871607	3871579	0.051	45	58	M
s_1_1_contig234110	gi|118135635|ref|NC_006088.2chromosome1	84.35	313	45	3	1069	1379	3871492	3871802	2e-89	334	1	S
s_1_1_contig148976	gi|118135635|ref|NC_006088.2chromosome1	68.61	1357	269	34	1994	3270	3873683	3874962	3e-143	515	3	S
s_1_1_contig35829	gi|118135635|ref|NC_006088.2chromosome1	73.26	1152	219	24	1	1088	3876653	3875527	0	661	2	S
s_1_1_contig245115	gi|118135635|ref|NC_006088.2chromosome1	77.73	256	49	4	245	496	3883197	3882946	2e-47	194	2	S
s_1_1_contig235136	gi|118135635|ref|NC_006088.2chromosome1	78.6	897	154	12	1428	2313	3885423	3884554	0	733	2	S
s_1_1_contig175409	gi|118135635|ref|NC_006088.2chromosome1	73.54	1285	214	22	1	1184	3886788	3888047	0	800	10	M
s_1_1_contig159268	gi|118135635|ref|NC_006088.2chromosome1	76.9	1675	232	28	3482	5082	3894610	3896203	0	1290	4	S
s_1_1_contig147278	gi|118135635|ref|NC_006088.2chromosome1	72.72	3028	534	71	114	3031	3900419	3903264	0	1680	1	S
s_1_1_contig230797	gi|118135635|ref|NC_006088.2chromosome1	70.27	1379	259	39	77	1374	3906526	3905218	7e-169	600	2	S
s_1_1_contig205064	gi|118135635|ref|NC_006088.2chromosome1	69.74	922	163	20	712	1558	3907349	3908229	2e-114	419	4	S
s_1_1_contig175731	gi|118135635|ref|NC_006088.2chromosome1	68.25	337	71	8	397	703	3911870	3912200	1e-25	122	12872	M
s_1_1_contig134955	gi|118135635|ref|NC_006088.2chromosome1	75.5	943	184	17	177	1091	3912517	3913440	2e-176	625	3	S
s_1_1_contig148999	gi|118135635|ref|NC_006088.2chromosome1	79.43	632	97	6	560	1184	3916441	3915836	4e-156	556	1	S
s_1_1_contig199692	gi|118135635|ref|NC_006088.2chromosome1	78.83	496	82	8	523	1001	3917477	3916988	3e-111	407	1	S
s_1_1_contig154749	gi|118135635|ref|NC_006088.2chromosome1	68.83	523	118	11	6	492	3918596	3918083	1e-48	199	1	S
s_1_1_contig153965	gi|118135635|ref|NC_006088.2chromosome1	71.09	1069	212	27	202	1214	3919610	3918583	2e-139	500	1	S
s_1_1_contig37606	gi|118135635|ref|NC_006088.2chromosome1	75.65	193	46	1	221	413	3920400	3920209	6e-29	132	1	S
s_1_1_contig244059	gi|118135635|ref|NC_006088.2chromosome1	76.27	59	14	0	71	129	3920634	3920692	0.026	45	17	M
s_1_1_contig281276	gi|118135635|ref|NC_006088.2chromosome1	67.84	482	114	9	86	544	3923647	3924110	3e-39	167	2	S
s_1_1_contig182975	gi|118135635|ref|NC_006088.2chromosome1	76.29	717	107	9	128	814	3924395	3925078	4e-152	544	2	S
s_1_1_contig234559	gi|118135635|ref|NC_006088.2chromosome1	81.54	959	133	15	396	1335	3928415	3927482	0	904	1	S
s_1_1_contig16948	gi|118135635|ref|NC_006088.2chromosome1	93.33	30	2	0	971	1000	3927868	3927839	0.014	46	47	M
s_1_1_contig212075	gi|118135635|ref|NC_006088.2chromosome1	73.9	318	68	9	425	736	3929543	3929851	8e-41	172	724	M
s_1_1_contig122853	gi|118135635|ref|NC_006088.2chromosome1	76.31	2605	471	46	2213	4732	3932399	3929856	0	1840	2	S
s_1_1_contig145041	gi|118135635|ref|NC_006088.2chromosome1	73.36	1644	320	31	2658	4223	3937158	3938761	0	957	1	S
s_1_1_contig35987	gi|118135635|ref|NC_006088.2chromosome1	73.06	527	106	9	941	1444	3939908	3940421	1e-79	302	1	S
s_1_1_contig274188	gi|118135635|ref|NC_006088.2chromosome1	67.62	979	200	21	24	929	3940508	3941442	3e-93	347	1	S
s_1_1_contig191039	gi|118135635|ref|NC_006088.2chromosome1	69.98	423	94	9	999	1393	3942677	3942260	1e-42	179	2	S
s_1_1_contig281422	gi|118135635|ref|NC_006088.2chromosome1	80.79	229	39	2	267	494	3943477	3943253	2e-52	210	1	S
s_1_1_contig243793	gi|118135635|ref|NC_006088.2chromosome1	73.69	1205	247	25	98	1275	3945102	3943941	0	695	1	S
s_1_1_contig243142	gi|118135635|ref|NC_006088.2chromosome1	75.84	836	141	18	719	1527	3946388	3947189	2e-160	571	2	S
s_1_1_contig39364	gi|118135635|ref|NC_006088.2chromosome1	71.98	753	135	17	90	788	3948712	3949442	4e-109	399	1	S
s_1_1_contig142884	gi|118135635|ref|NC_006088.2chromosome1	74.38	324	58	7	1819	2118	3950097	3949775	5e-49	201	3	S
s_1_1_contig205746	gi|118135635|ref|NC_006088.2chromosome1	70.09	341	72	7	7	322	3951413	3951748	4e-34	150	6895	M
s_1_1_contig242876	gi|118135635|ref|NC_006088.2chromosome1	76.69	236	42	2	9	234	3952950	3953182	7e-43	181	1	S
s_1_1_contig36321	gi|118135635|ref|NC_006088.2chromosome1	67.58	256	44	14	203	439	3957321	3957086	6e-07	61	67	M
s_1_1_contig128493	gi|118135635|ref|NC_006088.2chromosome1	82.69	468	74	3	4042	4502	3961703	3962170	5e-130	471	4	S
s_1_1_contig184674	gi|118135635|ref|NC_006088.2chromosome1	74.39	578	117	15	3	576	3969422	3968872	3e-90	336	1	S
s_1_1_contig190223	gi|118135635|ref|NC_006088.2chromosome1	73.76	221	47	5	26	240	3969445	3969660	1e-26	125	1	S
s_1_1_contig37361	gi|118135635|ref|NC_006088.2chromosome1	92.45	53	4	0	222	274	3969803	3969751	1e-12	79	18365	M
s_1_1_contig190769	gi|118135635|ref|NC_006088.2chromosome1	80.97	536	94	6	162	691	3970412	3970945	8e-136	488	1	S
s_1_1_contig145034	gi|118135635|ref|NC_006088.2chromosome1	82.11	492	81	4	5133	5622	3998263	3997777	5e-132	479	2	S
s_1_1_contig106105	gi|118135635|ref|NC_006088.2chromosome1	75.8	880	170	15	6206	7058	4013946	4014809	6e-168	598	3	S
s_1_1_contig208495	gi|118135635|ref|NC_006088.2chromosome1	72.07	333	87	3	102	430	4015151	4014821	2e-41	174	1	S
s_1_1_contig141917	gi|118135635|ref|NC_006088.2chromosome1	71.34	464	123	4	1888	2349	4015725	4015270	5e-57	228	7	M
s_1_1_contig252120	gi|118135635|ref|NC_006088.2chromosome1	77.13	223	46	4	179	397	4015665	4015444	4e-37	159	22	M
s_1_1_contig187838	gi|118135635|ref|NC_006088.2chromosome1	76.44	382	86	2	1018	1399	4017459	4017082	1e-72	279	95	M
s_1_1_contig154358	gi|118135635|ref|NC_006088.2chromosome1	72.21	331	71	7	2791	3105	4017184	4017509	1e-39	170	145	M
s_1_1_contig146034	gi|118135635|ref|NC_006088.2chromosome1	68.26	1276	322	24	298	1518	4025077	4023830	9e-122	443	2	S
s_1_1_contig185069	gi|118135635|ref|NC_006088.2chromosome1	66.54	254	57	7	623	860	4026120	4025879	8e-10	70	30	M
s_1_1_contig184511	gi|118135635|ref|NC_006088.2chromosome1	68.21	648	138	19	436	1044	4026806	4027424	4e-53	215	1	S
s_1_1_contig242218	gi|118135635|ref|NC_006088.2chromosome1	73.11	331	66	7	428	758	4035240	4034933	3e-44	185	1	S
s_1_1_contig154548	gi|118135635|ref|NC_006088.2chromosome1	66.85	1427	298	53	1431	2777	4052618	4051287	4e-96	360	6	S
s_1_1_contig182026	gi|118135635|ref|NC_006088.2chromosome1	75.11	450	77	6	188	603	4053643	4054091	2e-82	311	1	S
s_1_1_contig145333	gi|118135635|ref|NC_006088.2chromosome1	67.82	1613	347	54	4489	6010	4059434	4057903	1e-132	480	3	S
s_1_1_contig206896	gi|118135635|ref|NC_006088.2chromosome1	73.11	2789	535	73	873	3534	4071775	4069075	0	1514	4	S
s_1_1_contig275781	gi|118135635|ref|NC_006088.2chromosome1	70.36	550	112	11	935	1451	4073878	4074409	8e-65	253	1	S
s_1_1_contig89829	gi|118135635|ref|NC_006088.2chromosome1	74.67	2069	393	36	7881	9880	4077835	4075829	0	1324	8	S
s_1_1_contig205343	gi|118135635|ref|NC_006088.2chromosome1	75.38	658	124	10	437	1073	4085907	4085267	4e-123	446	1	S
s_1_1_contig230096	gi|118135635|ref|NC_006088.2chromosome1	72.02	890	151	26	178	990	4088415	4087547	4e-125	453	1	S
s_1_1_contig190594	gi|118135635|ref|NC_006088.2chromosome1	71.16	1824	367	40	1838	3570	4091623	4089868	0	881	1	S
s_1_1_contig161419	gi|118135635|ref|NC_006088.2chromosome1	72.56	1589	330	22	1557	3080	4094678	4093131	0	897	3	S
s_1_1_contig127487	gi|118135635|ref|NC_006088.2chromosome1	74.7	1008	190	20	1576	2553	4099002	4099974	3e-180	637	1	S
s_1_1_contig263825	gi|118135635|ref|NC_006088.2chromosome1	72.11	380	64	6	4	383	4100332	4100669	8e-55	219	1	S
s_1_1_contig154778	gi|118135635|ref|NC_006088.2chromosome1	78.52	149	27	3	1743	1889	4101649	4101504	3e-23	116	27041	M
s_1_1_contig281170	gi|118135635|ref|NC_006088.2chromosome1	76.19	147	26	3	52	189	4101653	4101507	7e-20	102	53649	M
s_1_1_contig244659	gi|118135635|ref|NC_006088.2chromosome1	76.86	121	16	2	566	674	4101650	4101530	3e-17	95	28840	M
s_1_1_contig247152	gi|118135635|ref|NC_006088.2chromosome1	79.61	103	16	3	943	1042	4101658	4101558	2e-13	82	36107	M
s_1_1_contig210259	gi|118135635|ref|NC_006088.2chromosome1	84.27	89	11	1	2078	2166	4101551	4101636	3e-17	97	27536	M
s_1_1_contig167697	gi|118135635|ref|NC_006088.2chromosome1	80.43	138	21	4	389	520	4101517	4101654	3e-23	114	19369	M
s_1_1_contig94900	gi|118135635|ref|NC_006088.2chromosome1	72.75	2257	461	46	9214	11400	4109578	4111750	0	1229	285	M
s_1_1_contig149115	gi|118135635|ref|NC_006088.2chromosome1	71.82	1803	335	31	1001	2700	4114344	4112612	0	978	3	S
s_1_1_contig226918	gi|118135635|ref|NC_006088.2chromosome1	71.64	335	79	6	300	630	4115592	4115914	6e-38	163	1	S
s_1_1_contig220670	gi|118135635|ref|NC_006088.2chromosome1	78.53	340	50	7	455	785	4119609	4119284	9e-71	273	2	S
s_1_1_contig86490	gi|118135635|ref|NC_006088.2chromosome1	68.48	1450	276	35	1588	2977	4121845	4123173	7e-157	560	1	S
s_1_1_contig161581	gi|118135635|ref|NC_006088.2chromosome1	72.47	2198	454	42	1809	3911	4125788	4127929	0	1184	1	S
s_1_1_contig60578	gi|118135635|ref|NC_006088.2chromosome1	76.16	2554	469	35	5545	7990	4135972	4138493	0	1829	8	S
s_1_1_contig269001	gi|118135635|ref|NC_006088.2chromosome1	72.77	1388	218	25	19	1338	4142374	4141079	0	830	1	S
s_1_1_contig147250	gi|118135635|ref|NC_006088.2chromosome1	76.74	1238	234	17	331	1536	4142745	4143960	0	906	22	M
s_1_1_contig12853	gi|118135635|ref|NC_006088.2chromosome1	100	24	0	0	284	307	4144658	4144681	0.044	45	198	M
s_1_1_contig232803	gi|118135635|ref|NC_006088.2chromosome1	69.56	2464	481	62	293	2596	4149727	4147373	0	1025	2	S
s_1_1_contig95419	gi|118135635|ref|NC_006088.2chromosome1	73.65	573	111	15	1464	2021	4153810	4153263	3e-85	322	4	S
s_1_1_contig270592	gi|118135635|ref|NC_006088.2chromosome1	74.48	529	108	5	26	537	4155718	4155200	3e-93	347	2	S
s_1_1_contig86579	gi|118135635|ref|NC_006088.2chromosome1	69.16	1216	240	28	270	1450	4157919	4156804	2e-138	499	2	S
s_1_1_contig95975	gi|118135635|ref|NC_006088.2chromosome1	74.07	1431	237	33	19	1362	4167633	4166250	0	881	19	M
s_1_1_contig81188	gi|118135635|ref|NC_006088.2chromosome1	74.11	3291	620	68	72	3267	4172591	4169438	0	1997	3	S
s_1_1_contig248709	gi|118135635|ref|NC_006088.2chromosome1	73.07	661	148	14	12	658	4173305	4172661	2e-95	354	1	S
s_1_1_contig195732	gi|118135635|ref|NC_006088.2chromosome1	74.48	1050	184	14	82	1091	4173328	4174333	0	699	1	S
s_1_1_contig145229	gi|118135635|ref|NC_006088.2chromosome1	97.56	123	3	0	88	210	4176905	4176783	2e-51	208	1	S
s_1_1_contig180838	gi|118135635|ref|NC_006088.2chromosome1	69.93	878	171	30	278	1108	4179883	4179052	2e-91	342	1	S
s_1_1_contig146386	gi|118135635|ref|NC_006088.2chromosome1	78.53	545	85	13	627	1145	4180201	4180739	9e-117	426	73	M
s_1_1_contig22781	gi|118135635|ref|NC_006088.2chromosome1	79.17	144	25	3	342	481	4185336	4185194	6e-24	116	28429	M
s_1_1_contig205012	gi|118135635|ref|NC_006088.2chromosome1	83.33	150	22	2	1505	1651	4185193	4185342	2e-34	152	23	M
s_1_1_contig65319	gi|118135635|ref|NC_006088.2chromosome1	73.09	9862	1863	219	23491	32955	4201510	4192043	0	5546	18	S
s_1_1_contig108375	gi|118135635|ref|NC_006088.2chromosome1	75.94	927	127	20	46	910	4235387	4234495	0	663	1	S
s_1_1_contig269006	gi|118135635|ref|NC_006088.2chromosome1	84.43	623	80	6	119	731	4235526	4236141	0	675	3	S
s_1_1_contig217712	gi|118135635|ref|NC_006088.2chromosome1	76.2	685	139	9	365	1038	4242466	4241795	8e-134	482	1	S
s_1_1_contig98965	gi|118135635|ref|NC_006088.2chromosome1	71.44	1779	386	34	1536	3272	4244295	4242597	0	875	4	S
s_1_1_contig44533	gi|118135635|ref|NC_006088.2chromosome1	85.37	41	5	1	130	169	4252154	4252194	0.023	45	44	M
s_1_1_contig74988	gi|118135635|ref|NC_006088.2chromosome1	83.28	1286	149	17	3792	5062	4251454	4252688	0	1333	9	S
s_1_1_contig241086	gi|118135635|ref|NC_006088.2chromosome1	82.72	81	14	0	324	404	4261903	4261983	5e-14	84	5243	M
s_1_1_contig68208	gi|118135635|ref|NC_006088.2chromosome1	79.08	2151	370	24	1785	3877	4271044	4268916	0	1815	13	M
s_1_1_contig59415	gi|118135635|ref|NC_006088.2chromosome1	79.17	7148	1060	102	1790	8632	4274754	4281777	0	6105	2	S
s_1_1_contig277160	gi|118135635|ref|NC_006088.2chromosome1	92.52	602	20	4	1	599	4282083	4282662	0	888	1	S
s_1_1_contig163074	gi|118135635|ref|NC_006088.2chromosome1	70.34	1342	261	30	1125	2396	4285465	4284191	4e-173	614	3	S
s_1_1_contig184325	gi|118135635|ref|NC_006088.2chromosome1	67.2	1006	229	32	563	1523	4286996	4287945	7e-71	273	2	S
s_1_1_contig114423	gi|118135635|ref|NC_006088.2chromosome1	76.57	1084	136	19	292	1302	4288337	4289375	0	830	2	S
s_1_1_contig51824	gi|118135635|ref|NC_006088.2chromosome1	76.03	2303	414	40	3228	5450	4292919	4290675	0	1609	6	S
s_1_1_contig41570	gi|118135635|ref|NC_006088.2chromosome1	100	28	0	0	182	209	4293806	4293779	0.0002	52	129	M
s_1_1_contig46202	gi|118135635|ref|NC_006088.2chromosome1	72.43	729	136	20	3	716	4298444	4299122	1e-102	378	1	S
s_1_1_contig30957	gi|118135635|ref|NC_006088.2chromosome1	82.93	41	7	0	312	352	4299446	4299486	0.069	43	45	M
s_1_1_contig151460	gi|118135635|ref|NC_006088.2chromosome1	78.18	2420	353	45	6343	8652	4306107	4308461	0	1939	4	S
s_1_1_contig261121	gi|118135635|ref|NC_006088.2chromosome1	77.82	1722	258	36	3	1663	4308457	4310115	0	1333	2	S
s_1_1_contig221976	gi|118135635|ref|NC_006088.2chromosome1	74.23	551	104	12	1254	1788	4313800	4314328	3e-89	334	1	S
s_1_1_contig220391	gi|118135635|ref|NC_006088.2chromosome1	73.06	3563	667	77	23	3383	4314613	4318084	0	2015	1	S
s_1_1_contig223698	gi|118135635|ref|NC_006088.2chromosome1	76.84	1196	144	20	2033	3165	4324145	4325270	0	939	7	S
s_1_1_contig24413	gi|118135635|ref|NC_006088.2chromosome1	83.13	569	56	6	136	704	4328479	4329007	1e-170	603	1	S
s_1_1_contig206191	gi|118135635|ref|NC_006088.2chromosome1	67.47	415	72	10	114	502	4329753	4329376	5e-35	152	1	S
s_1_1_contig22337	gi|118135635|ref|NC_006088.2chromosome1	88.79	437	26	3	1210	1646	4331021	4331434	3e-161	574	1	S
s_1_1_contig143930	gi|118135635|ref|NC_006088.2chromosome1	68.71	652	96	16	1708	2315	4334471	4335058	4e-73	282	2	S
s_1_1_contig178189	gi|118135635|ref|NC_006088.2chromosome1	88.76	169	17	2	764	930	4338732	4338900	1e-52	212	1	S
s_1_1_contig249508	gi|118135635|ref|NC_006088.2chromosome1	94.12	170	9	1	2	170	4343504	4343335	7e-67	259	1	S
s_1_1_contig243051	gi|118135635|ref|NC_006088.2chromosome1	87.65	324	16	8	7	320	4344415	4344106	2e-106	390	2	S
s_1_1_contig95417	gi|118135635|ref|NC_006088.2chromosome1	71.48	2907	487	93	2084	4899	4347123	4344468	0	1395	3	S
s_1_1_contig10120	gi|118135635|ref|NC_006088.2chromosome1	81.75	526	78	9	1375	1887	4350484	4351004	3e-136	491	3	S
s_1_1_contig118982	gi|118135635|ref|NC_006088.2chromosome1	83.66	1756	214	13	6499	8239	4355699	4354002	0	1880	10	S
s_1_1_contig220960	gi|118135635|ref|NC_006088.2chromosome1	80.83	120	22	1	1844	1962	4362374	4362255	4e-21	109	20872	M
s_1_1_contig109406	gi|118135635|ref|NC_006088.2chromosome1	78.98	847	133	10	1254	2076	4369614	4370439	0	720	3	S
s_1_1_contig140318	gi|118135635|ref|NC_006088.2chromosome1	76.64	959	159	15	2009	2956	4373985	4373081	0	711	3	S
s_1_1_contig64415	gi|118135635|ref|NC_006088.2chromosome1	70.51	607	123	17	1063	1650	4376406	4376975	1e-67	262	1	S
s_1_1_contig229722	gi|118135635|ref|NC_006088.2chromosome1	70.39	726	168	20	10	711	4377727	4377025	4e-77	293	1	S
s_1_1_contig41882	gi|118135635|ref|NC_006088.2chromosome1	80.08	251	42	5	92	337	4377935	4378182	7e-53	212	2	S
s_1_1_contig103656	gi|118135635|ref|NC_006088.2chromosome1	74.09	2061	375	45	68	2045	4379358	4381342	0	1251	5	S
s_1_1_contig212083	gi|118135635|ref|NC_006088.2chromosome1	90.62	32	3	0	216	247	4381628	4381597	0.024	45	25	M
s_1_1_contig94227	gi|118135635|ref|NC_006088.2chromosome1	78.58	1410	244	20	1	1377	4385585	4386969	0	1144	3	S
s_1_1_contig180594	gi|118135635|ref|NC_006088.2chromosome1	81.18	2136	325	33	1972	4070	4393579	4391484	0	1961	4347	M
s_1_1_contig180006	gi|118135635|ref|NC_006088.2chromosome1	80.15	2973	438	41	2	2897	4388629	4391526	0	2654	1	S
s_1_1_contig147504	gi|118135635|ref|NC_006088.2chromosome1	75.74	1150	214	15	306	1413	4394709	4395835	0	807	1	S
s_1_1_contig113989	gi|118135635|ref|NC_006088.2chromosome1	76.11	1829	316	34	80	1836	4397906	4396127	0	1285	1	S
s_1_1_contig73226	gi|118135635|ref|NC_006088.2chromosome1	77.35	2909	422	50	13481	16261	4400712	4397913	0	2264	7	S
s_1_1_contig49118	gi|118135635|ref|NC_006088.2chromosome1	83.58	67	9	2	279	344	4412605	4412540	3e-08	64	630	M
s_1_1_contig83369	gi|118135635|ref|NC_006088.2chromosome1	75.96	2841	473	51	80	2860	4414572	4417262	0	2004	5	S
s_1_1_contig219140	gi|118135635|ref|NC_006088.2chromosome1	77.97	1053	190	19	22	1042	4424198	4423156	0	805	2	S
s_1_1_contig88452	gi|118135635|ref|NC_006088.2chromosome1	75.5	5233	933	82	1	5040	4429251	4424175	0	3602	1	S
s_1_1_contig81245	gi|118135635|ref|NC_006088.2chromosome1	70.72	1250	283	27	1033	2252	4430631	4431827	3e-156	558	227	M
s_1_1_contig187521	gi|118135635|ref|NC_006088.2chromosome1	71.49	449	101	9	180	616	4435205	4435638	2e-54	217	1	S
s_1_1_contig158584	gi|118135635|ref|NC_006088.2chromosome1	79.13	1720	295	20	1736	3427	4445995	4444312	0	1451	6	S
s_1_1_contig111786	gi|118135635|ref|NC_006088.2chromosome1	83.4	1205	135	19	3372	4543	4452229	4451057	0	1245	4	S
s_1_1_contig97054	gi|118135635|ref|NC_006088.2chromosome1	81.76	2160	282	31	3384	5471	4456030	4458149	0	2080	2	S
s_1_1_contig218769	gi|118135635|ref|NC_006088.2chromosome1	75.93	1728	287	27	850	2552	4460359	4461982	0	1236	2	S
s_1_1_contig232811	gi|118135635|ref|NC_006088.2chromosome1	81.75	1348	200	22	12	1349	4465082	4466393	0	1265	2	S
s_1_1_contig120550	gi|118135635|ref|NC_006088.2chromosome1	77.99	2349	393	38	55	2351	4467625	4469901	0	1846	5	S
s_1_1_contig240415	gi|118135635|ref|NC_006088.2chromosome1	85.71	98	14	0	653	750	4469926	4470023	2e-23	114	35503	M
s_1_1_contig161734	gi|118135635|ref|NC_006088.2chromosome1	75.49	2456	422	51	731	3105	4485226	4482870	0	1647	3	S
s_1_1_contig5563	gi|118135635|ref|NC_006088.2chromosome1	79.63	54	11	0	1858	1911	4488235	4488182	0.007	48	31	M
s_1_1_contig76421	gi|118135635|ref|NC_006088.2chromosome1	71.03	4422	848	88	348	4521	4486061	4490297	0	2194	5	S
s_1_1_contig277765	gi|118135635|ref|NC_006088.2chromosome1	81.13	53	7	1	89	141	4492462	4492511	0.0005	50	27	M
s_1_1_contig228438	gi|118135635|ref|NC_006088.2chromosome1	65.82	673	158	17	28	646	4499187	4498533	1e-38	165	1	S
s_1_1_contig93931	gi|118135635|ref|NC_006088.2chromosome1	75.36	1177	188	28	3806	4922	4509800	4508666	0	782	11	S
s_1_1_contig229465	gi|118135635|ref|NC_006088.2chromosome1	87.88	33	4	0	568	600	4511162	4511194	0.18	43	52	M
s_1_1_contig59061	gi|118135635|ref|NC_006088.2chromosome1	78.9	1128	187	18	6823	7913	4523225	4524338	0	926	7	S
s_1_1_contig222516	gi|118135635|ref|NC_006088.2chromosome1	75.09	875	163	19	95	923	4525246	4524381	2e-157	560	1	S
s_1_1_contig26736	gi|118135635|ref|NC_006088.2chromosome1	85.6	486	56	9	609	1090	4526437	4525962	3e-149	533	2	S
s_1_1_contig116875	gi|118135635|ref|NC_006088.2chromosome1	70.06	3106	645	70	3423	6421	4530229	4533156	0	1350	4	S
s_1_1_contig75575	gi|118135635|ref|NC_006088.2chromosome1	75.4	3216	577	61	7189	10276	4558976	4555847	0	2152	15	S
s_1_1_contig160896	gi|118135635|ref|NC_006088.2chromosome1	91.11	45	3	1	13	57	4560345	4560388	1e-06	61	114	M
s_1_1_contig17125	gi|118135635|ref|NC_006088.2chromosome1	75.06	2622	474	37	2586	5100	4569919	4572467	0	1775	3	S
s_1_1_contig153170	gi|118135635|ref|NC_006088.2chromosome1	83.72	1235	154	16	1540	2750	4573713	4572502	0	1292	2	S
s_1_1_contig273409	gi|118135635|ref|NC_006088.2chromosome1	78.67	75	14	2	728	800	4573123	4573049	5e-06	57	116	M
s_1_1_contig86632	gi|118135635|ref|NC_006088.2chromosome1	79.08	3685	597	57	3	3603	4584418	4580824	0	3070	62	M
s_1_1_contig240272	gi|118135635|ref|NC_006088.2chromosome1	69.76	615	122	7	4	615	4584409	4584962	2e-78	297	1	S
s_1_1_contig26583	gi|118135635|ref|NC_006088.2chromosome1	75.26	760	140	12	9	753	4590454	4589728	2e-143	513	2	S
s_1_1_contig25795	gi|118135635|ref|NC_006088.2chromosome1	86.24	1403	161	9	258	1642	4590756	4592144	0	1649	2	S
s_1_1_contig115936	gi|118135635|ref|NC_006088.2chromosome1	80.69	1367	220	14	3213	4553	4594100	4592752	0	1252	2	S
s_1_1_contig66327	gi|118135635|ref|NC_006088.2chromosome1	79.56	3977	637	49	1	3877	4604127	4600227	0	3445	417	M
s_1_1_contig169055	gi|118135635|ref|NC_006088.2chromosome1	76.17	1435	264	20	1252	2635	4605296	4606703	0	1027	1	S
s_1_1_contig87166	gi|118135635|ref|NC_006088.2chromosome1	76.84	3320	566	59	2	3182	4620906	4617651	0	2437	5	S
s_1_1_contig7166	gi|118135635|ref|NC_006088.2chromosome1	76.68	3748	694	53	582	4214	4627868	4624186	0	2742	3	S
s_1_1_contig44246	gi|118135635|ref|NC_006088.2chromosome1	78.02	91	16	3	368	456	4626605	4626517	3e-08	64	80	M
s_1_1_contig248231	gi|118135635|ref|NC_006088.2chromosome1	66.32	291	72	10	152	424	4626799	4626517	9e-08	63	47	M
s_1_1_contig101440	gi|118135635|ref|NC_006088.2chromosome1	74.54	4431	775	83	475	4727	4629044	4633299	0	2850	1	S
s_1_1_contig235184	gi|118135635|ref|NC_006088.2chromosome1	80.84	1947	290	34	30	1922	4633439	4635356	0	1752	1	S
s_1_1_contig126713	gi|118135635|ref|NC_006088.2chromosome1	72.35	2644	552	53	1	2594	4642692	4640178	0	1395	5	S
s_1_1_contig57223	gi|118135635|ref|NC_006088.2chromosome1	69.01	1865	385	41	113	1818	4645387	4643557	0	747	1	S
s_1_1_contig229225	gi|118135635|ref|NC_006088.2chromosome1	73.98	1276	197	26	143	1331	4647797	4646570	0	809	2	S
s_1_1_contig14083	gi|118135635|ref|NC_006088.2chromosome1	79.49	1741	270	34	1580	3271	4649894	4651596	0	1456	3	S
s_1_1_contig175292	gi|118135635|ref|NC_006088.2chromosome1	78.11	982	139	19	543	1464	4653053	4652088	0	785	1	S
s_1_1_contig249240	gi|118135635|ref|NC_006088.2chromosome1	84.21	38	6	0	190	227	4659415	4659378	0.081	43	26	M
s_1_1_contig61722	gi|118135635|ref|NC_006088.2chromosome1	75.61	1525	266	27	942	2396	4658262	4659750	0	1047	5	S
s_1_1_contig167560	gi|118135635|ref|NC_006088.2chromosome1	76.53	2527	443	42	2099	4555	4668965	4666519	0	1829	7	M
s_1_1_contig267914	gi|118135635|ref|NC_006088.2chromosome1	72.6	1168	237	23	1444	2574	4671796	4672917	9e-180	636	2	S
s_1_1_contig95703	gi|118135635|ref|NC_006088.2chromosome1	72.1	3090	571	81	678	3630	4673442	4676377	0	1584	1	S
s_1_1_contig177348	gi|118135635|ref|NC_006088.2chromosome1	68.73	518	123	16	4	500	4676416	4676915	2e-39	167	1	S
s_1_1_contig192693	gi|118135635|ref|NC_006088.2chromosome1	72.07	1031	225	20	2355	3361	4678409	4679400	5e-147	527	2869	M
s_1_1_contig102515	gi|118135635|ref|NC_006088.2chromosome1	76.39	1440	271	19	2366	3768	4685276	4686683	0	1041	3	S
s_1_1_contig157724	gi|118135635|ref|NC_006088.2chromosome1	76.1	1473	246	24	1178	2615	4688875	4687474	0	1058	2	S
s_1_1_contig65454	gi|118135635|ref|NC_006088.2chromosome1	77.59	2735	469	46	228	2851	4692294	4694995	0	2091	3	S
s_1_1_contig16114	gi|118135635|ref|NC_006088.2chromosome1	93.33	30	2	0	2949	2978	4696602	4696631	0.043	46	82	M
s_1_1_contig81547	gi|118135635|ref|NC_006088.2chromosome1	74.62	977	163	20	2996	3965	4699705	4698807	6e-178	630	4	S
s_1_1_contig68076	gi|118135635|ref|NC_006088.2chromosome1	72.17	1053	231	17	2115	3111	4705055	4706101	4e-156	558	3	S
s_1_1_contig98873	gi|118135635|ref|NC_006088.2chromosome1	70.55	1633	293	40	1935	3494	4707068	4708585	0	765	2	S
s_1_1_contig82530	gi|118135635|ref|NC_006088.2chromosome1	77.44	1427	257	16	4678	6077	4711985	4710597	0	1108	3	S
s_1_1_contig243789	gi|118135635|ref|NC_006088.2chromosome1	74.05	713	131	16	572	1255	4717362	4716675	2e-117	428	3	M
s_1_1_contig81470	gi|118135635|ref|NC_006088.2chromosome1	76.51	1175	229	13	945	2103	4723272	4722129	0	859	695	M
s_1_1_contig198578	gi|118135635|ref|NC_006088.2chromosome1	73.12	863	189	17	58	890	4724699	4725548	2e-131	473	1	S
s_1_1_contig19015	gi|118135635|ref|NC_006088.2chromosome1	69.26	540	130	9	341	846	4729182	4729719	3e-54	217	3	S
s_1_1_contig8436	gi|118135635|ref|NC_006088.2chromosome1	72.64	1875	354	34	2	1771	4735841	4734021	0	1059	1	S
s_1_1_contig96800	gi|118135635|ref|NC_006088.2chromosome1	78.8	1349	219	21	2690	4027	4732748	4734040	0	1110	2	S
s_1_1_contig132797	gi|118135635|ref|NC_006088.2chromosome1	76.83	3177	605	50	36	3130	4739853	4736726	0	2304	1	S
s_1_1_contig228139	gi|118135635|ref|NC_006088.2chromosome1	77.16	915	147	8	651	1512	4739927	4740832	0	728	1	S
s_1_1_contig232364	gi|118135635|ref|NC_006088.2chromosome1	76.3	2722	455	56	5	2609	4743612	4740964	0	1920	1	S
s_1_1_contig159775	gi|118135635|ref|NC_006088.2chromosome1	78.81	1482	244	27	4623	6070	4745024	4743579	0	1198	5	S
s_1_1_contig265788	gi|118135635|ref|NC_006088.2chromosome1	79.57	646	109	4	719	1343	4758604	4757961	6e-161	572	1	S
s_1_1_contig208051	gi|118135635|ref|NC_006088.2chromosome1	69.56	864	184	19	56	876	4763576	4762749	2e-96	358	1	S
s_1_1_contig10837	gi|118135635|ref|NC_006088.2chromosome1	69.83	1203	254	28	130	1290	4763766	4764901	5e-141	506	1	S
s_1_1_contig200571	gi|118135635|ref|NC_006088.2chromosome1	100	23	0	0	403	425	4765899	4765921	0.12	43	48	M
s_1_1_contig87362	gi|118135635|ref|NC_006088.2chromosome1	77.63	2848	448	44	6028	8806	4770130	4767403	0	2237	7	S
s_1_1_contig119275	gi|118135635|ref|NC_006088.2chromosome1	77.58	1280	230	20	1601	2856	4778053	4779299	0	976	3	S
s_1_1_contig147274	gi|118135635|ref|NC_006088.2chromosome1	81.4	430	75	4	1650	2074	4782343	4781914	4e-109	401	1	S
s_1_1_contig89265	gi|118135635|ref|NC_006088.2chromosome1	70.07	1664	302	43	2845	4433	4787139	4788681	0	738	4	S
s_1_1_contig200059	gi|118135635|ref|NC_006088.2chromosome1	74.61	1646	316	35	1	1582	4794733	4793126	0	1018	2	S
s_1_1_contig69402	gi|118135635|ref|NC_006088.2chromosome1	75.83	1920	321	39	3685	5541	4798992	4800831	0	1324	8	S
s_1_1_contig227654	gi|118135635|ref|NC_006088.2chromosome1	75.89	2626	444	51	102	2670	4806877	4809370	0	1822	1	S
s_1_1_contig224553	gi|118135635|ref|NC_006088.2chromosome1	88.57	35	4	0	181	215	4810773	4810807	0.008	46	41	M
s_1_1_contig80708	gi|118135635|ref|NC_006088.2chromosome1	74.19	4649	865	93	3857	8363	4818943	4814488	0	2857	5	S
s_1_1_contig213267	gi|118135635|ref|NC_006088.2chromosome1	68.43	624	150	15	59	675	4824219	4823636	1e-52	212	1	S
s_1_1_contig255792	gi|118135635|ref|NC_006088.2chromosome1	72.91	347	71	14	206	541	4825138	4825472	5e-37	159	6	M
s_1_1_contig30056	gi|118135635|ref|NC_006088.2chromosome1	70.44	274	75	6	357	627	4825287	4825557	6e-21	107	98	M
s_1_1_contig116021	gi|118135635|ref|NC_006088.2chromosome1	73.6	1246	220	24	1	1206	4830770	4829594	0	755	1	S
s_1_1_contig1919	gi|118135635|ref|NC_006088.2chromosome1	96	25	1	0	31	55	4830749	4830773	0.25	41	13	M
s_1_1_contig176839	gi|118135635|ref|NC_006088.2chromosome1	86.49	570	68	4	1	566	4830757	4831321	0	672	1	S
s_1_1_contig266414	gi|118135635|ref|NC_006088.2chromosome1	74.62	729	142	13	76	781	4833461	4832753	3e-127	461	1	S
s_1_1_contig192311	gi|118135635|ref|NC_006088.2chromosome1	84.69	431	57	4	1	431	4836171	4835750	7e-130	470	2	S
s_1_1_contig105958	gi|118135635|ref|NC_006088.2chromosome1	75.68	1649	296	24	249	1869	4840733	4839162	0	1153	19	M
s_1_1_contig199069	gi|118135635|ref|NC_006088.2chromosome1	74.31	1347	191	26	116	1345	4841930	4843238	0	892	2	S
s_1_1_contig68352	gi|118135635|ref|NC_006088.2chromosome1	80.38	1544	240	23	3576	5106	4853501	4854994	0	1371	9	M
s_1_1_contig241724	gi|118135635|ref|NC_006088.2chromosome1	69.82	169	50	1	297	465	4857585	4857752	1e-10	72	161	M
s_1_1_contig260983	gi|118135635|ref|NC_006088.2chromosome1	72.7	1000	214	21	1031	1989	4858839	4857858	2e-148	531	1	S
s_1_1_contig132341	gi|118135635|ref|NC_006088.2chromosome1	74.21	985	162	24	999	1910	4862041	4863006	3e-171	607	1	S
s_1_1_contig93684	gi|118135635|ref|NC_006088.2chromosome1	71.53	5844	1109	126	2920	8501	4865335	4870885	0	2969	2	S
s_1_1_contig166494	gi|118135635|ref|NC_006088.2chromosome1	74.71	2325	444	36	32	2281	4877018	4874763	0	1510	2	S
s_1_1_contig78780	gi|118135635|ref|NC_006088.2chromosome1	76.38	1321	236	21	2377	3661	4880083	4881363	0	949	3	S
s_1_1_contig91804	gi|118135635|ref|NC_006088.2chromosome1	79.44	1775	267	26	1527	3232	4884777	4886522	0	1526	4	S
s_1_1_contig236675	gi|118135635|ref|NC_006088.2chromosome1	74.05	524	90	7	10	498	4897298	4897810	7e-92	342	2	S
s_1_1_contig90891	gi|118135635|ref|NC_006088.2chromosome1	72.44	2032	402	37	1053	2993	4898591	4900555	0	1115	5	M
s_1_1_contig63530	gi|118135635|ref|NC_006088.2chromosome1	74.28	871	175	17	6829	7664	4901414	4900558	6e-147	529	1758	M
s_1_1_contig169714	gi|118135635|ref|NC_006088.2chromosome1	76.48	1314	239	23	2	1303	4904230	4902975	0	937	2	S
s_1_1_contig107573	gi|118135635|ref|NC_006088.2chromosome1	72.25	4101	822	78	1461	5375	4906076	4910046	0	2199	4	S
s_1_1_contig27891	gi|118135635|ref|NC_006088.2chromosome1	86.59	522	57	6	118	638	4917690	4918199	8e-173	610	2	S
s_1_1_contig117063	gi|118135635|ref|NC_006088.2chromosome1	79.66	2326	357	38	1112	3370	4923607	4921331	0	1995	5	S
s_1_1_contig20068	gi|118135635|ref|NC_006088.2chromosome1	96.67	30	1	0	667	696	4923742	4923771	0.002	50	63	M
s_1_1_contig140248	gi|118135635|ref|NC_006088.2chromosome1	74.26	1651	312	25	84	1712	4929888	4928329	0	1050	4494	M
s_1_1_contig97414	gi|118135635|ref|NC_006088.2chromosome1	72.49	3490	681	62	22	3340	4929902	4933283	0	1938	2	S
s_1_1_contig225591	gi|118135635|ref|NC_006088.2chromosome1	72.04	955	191	27	230	1150	4934353	4935265	1e-128	466	2	S
s_1_1_contig5533	gi|118135635|ref|NC_006088.2chromosome1	71.56	2257	451	39	1066	3209	4942699	4940521	0	1173	4	S
s_1_1_contig163749	gi|118135635|ref|NC_006088.2chromosome1	70.05	404	81	10	611	978	4944723	4944324	5e-41	174	4	M
s_1_1_contig150924	gi|118135635|ref|NC_006088.2chromosome1	77.63	1654	292	23	1546	3171	4946837	4945234	0	1281	1	S
s_1_1_contig206396	gi|118135635|ref|NC_006088.2chromosome1	85.61	535	61	12	85	607	4950195	4949665	5e-163	578	1	S
s_1_1_contig224279	gi|118135635|ref|NC_006088.2chromosome1	76.14	1228	215	19	677	1857	4951140	4952336	0	879	1	S
s_1_1_contig6935	gi|118135635|ref|NC_006088.2chromosome1	67.87	912	198	27	8	875	4953269	4952409	2e-75	288	1	S
s_1_1_contig132555	gi|118135635|ref|NC_006088.2chromosome1	77.23	1805	308	22	1607	3331	4954585	4956366	0	1397	10	M
s_1_1_contig46946	gi|118135635|ref|NC_006088.2chromosome1	83.02	53	5	2	542	594	4973245	4973293	0.0006	50	27	M
s_1_1_contig76319	gi|118135635|ref|NC_006088.2chromosome1	89.19	37	4	0	1	37	4977005	4976969	0.008	50	74	M
s_1_1_contig71733	gi|118135635|ref|NC_006088.2chromosome1	78.43	4881	804	66	20329	25045	4983461	4988256	0	3983	11	S
s_1_1_contig180608	gi|118135635|ref|NC_006088.2chromosome1	68.13	2978	633	79	57	2859	4996208	4999044	0	1021	1	S
s_1_1_contig114650	gi|118135635|ref|NC_006088.2chromosome1	76.6	1329	220	22	526	1825	5001211	4999945	0	978	3	S
s_1_1_contig119638	gi|118135635|ref|NC_006088.2chromosome1	88.57	35	4	0	2295	2329	5000363	5000397	0.079	46	49	M
s_1_1_contig244898	gi|118135635|ref|NC_006088.2chromosome1	75.71	494	85	12	26	511	5003711	5003245	2e-87	327	1	S
s_1_1_contig7218	gi|118135635|ref|NC_006088.2chromosome1	83.77	955	108	14	2224	3163	5004705	5003783	0	1003	2	S
s_1_1_contig263885	gi|118135635|ref|NC_006088.2chromosome1	72.51	975	204	18	128	1075	5008020	5007083	2e-147	527	1	S
s_1_1_contig273293	gi|118135635|ref|NC_006088.2chromosome1	68.46	612	144	14	398	997	5009852	5010426	1e-53	215	1	S
s_1_1_contig263439	gi|118135635|ref|NC_006088.2chromosome1	70.84	2829	548	59	7	2702	5010516	5013200	0	1366	4	S
s_1_1_contig233157	gi|118135635|ref|NC_006088.2chromosome1	71.07	522	100	11	316	796	5021284	5021795	4e-66	257	1	S
s_1_1_contig58454	gi|118135635|ref|NC_006088.2chromosome1	77.8	1554	272	30	1473	3001	5027003	5028508	0	1178	5	S
s_1_1_contig148101	gi|118135635|ref|NC_006088.2chromosome1	71.28	1069	212	22	149	1192	5034117	5033119	3e-148	531	1	S
s_1_1_contig273949	gi|118135635|ref|NC_006088.2chromosome1	73.66	205	38	3	801	992	5034433	5034232	4e-27	127	1	S
s_1_1_contig274710	gi|118135635|ref|NC_006088.2chromosome1	77.9	181	33	3	256	430	5034438	5034259	9e-31	140	11	M
s_1_1_contig116595	gi|118135635|ref|NC_006088.2chromosome1	70.32	1917	342	41	1932	3695	5037884	5039726	0	911	2	S
s_1_1_contig170656	gi|118135635|ref|NC_006088.2chromosome1	72.84	1182	276	19	434	1577	5044366	5043192	0	639	5167	M
s_1_1_contig87711	gi|118135635|ref|NC_006088.2chromosome1	76.8	970	197	11	14155	15100	5044251	5043286	0	711	5758	M
s_1_1_contig21672	gi|118135635|ref|NC_006088.2chromosome1	73.97	822	198	9	1177	1988	5043199	5044014	2e-136	491	5759	M
s_1_1_contig253712	gi|118135635|ref|NC_006088.2chromosome1	77.18	504	105	4	15	508	5044634	5044131	7e-104	381	1302	M
s_1_1_contig253400	gi|118135635|ref|NC_006088.2chromosome1	79.09	569	109	8	6	565	5043713	5044280	3e-128	462	2754	M
s_1_1_contig274582	gi|118135635|ref|NC_006088.2chromosome1	74.51	455	105	5	217	664	5043909	5044359	1e-74	286	796	M
s_1_1_contig92926	gi|118135635|ref|NC_006088.2chromosome1	76.29	641	134	9	2549	3180	5043976	5044607	2e-122	446	872	M
s_1_1_contig147018	gi|118135635|ref|NC_006088.2chromosome1	70.63	2983	653	55	2575	5454	5049190	5046328	0	1384	1578	M
s_1_1_contig79603	gi|118135635|ref|NC_006088.2chromosome1	70.12	3775	845	78	2103	5746	5054380	5058002	0	1626	4	S
s_1_1_contig266407	gi|118135635|ref|NC_006088.2chromosome1	83.78	783	111	7	1803	2575	5063935	5063159	0	823	1	S
s_1_1_contig76754	gi|118135635|ref|NC_006088.2chromosome1	71.65	2667	552	41	542	3042	5071108	5068480	0	1400	4	S
s_1_1_contig166672	gi|118135635|ref|NC_006088.2chromosome1	68.8	2798	616	70	288	2954	5074433	5071762	0	1027	1	S
s_1_1_contig1149	gi|118135635|ref|NC_006088.2chromosome1	72.22	450	86	8	337	761	5074836	5075271	1e-63	248	1	S
s_1_1_contig94352	gi|118135635|ref|NC_006088.2chromosome1	70.86	2337	531	41	9546	11820	5080944	5078696	0	1095	7	S
s_1_1_contig108487	gi|118135635|ref|NC_006088.2chromosome1	68.89	884	182	25	657	1492	5093059	5093897	4e-86	325	2	S
s_1_1_contig96373	gi|118135635|ref|NC_006088.2chromosome1	70.21	2162	451	48	6299	8369	5097247	5095188	0	953	5	S
s_1_1_contig167637	gi|118135635|ref|NC_006088.2chromosome1	68.31	1098	223	32	117	1192	5110202	5109208	7e-103	379	1	S
s_1_1_contig44753	gi|118135635|ref|NC_006088.2chromosome1	70.11	532	129	13	31	560	5110890	5110387	8e-53	212	1	S
s_1_1_contig202052	gi|118135635|ref|NC_006088.2chromosome1	74.95	2028	379	33	565	2514	5111266	5113242	0	1335	1	S
s_1_1_contig144261	gi|118135635|ref|NC_006088.2chromosome1	88.89	63	6	1	1892	1954	5114333	5114394	4e-12	79	1624	M
s_1_1_contig132690	gi|118135635|ref|NC_006088.2chromosome1	76.8	1871	332	29	2387	4216	5118835	5120644	0	1379	4	S
s_1_1_contig263541	gi|118135635|ref|NC_006088.2chromosome1	71.13	1562	334	34	806	2331	5122520	5121040	0	737	2	S
s_1_1_contig41636	gi|118135635|ref|NC_006088.2chromosome1	74.87	780	150	17	1	751	5124460	5125222	8e-136	488	1	S
s_1_1_contig125844	gi|118135635|ref|NC_006088.2chromosome1	73.49	1954	344	45	4081	5983	5128548	5130378	0	1142	3	S
s_1_1_contig14113	gi|118135635|ref|NC_006088.2chromosome1	71.61	2469	470	52	22	2353	5132985	5130611	0	1267	1	S
s_1_1_contig80675	gi|118135635|ref|NC_006088.2chromosome1	70.86	1637	330	37	106	1709	5140449	5138927	0	767	2	S
s_1_1_contig13919	gi|118135635|ref|NC_006088.2chromosome1	79.22	510	72	9	937	1435	5141129	5141615	1e-118	432	1	S
s_1_1_contig20584	gi|118135635|ref|NC_006088.2chromosome1	77.14	1251	231	12	1476	2695	5142851	5144077	0	962	2	S
s_1_1_contig162455	gi|118135635|ref|NC_006088.2chromosome1	70.5	1827	343	35	33	1807	5145645	5147327	0	884	3226	M
s_1_1_contig107645	gi|118135635|ref|NC_006088.2chromosome1	76.72	829	147	16	7432	8238	5155716	5154912	1e-166	594	8	S
s_1_1_contig117212	gi|118135635|ref|NC_006088.2chromosome1	76.45	1257	209	14	6034	7232	5167989	5166762	0	948	3	S
s_1_1_contig159156	gi|118135635|ref|NC_006088.2chromosome1	82.74	991	141	10	1639	2615	5172752	5171778	0	998	3	S
s_1_1_contig278325	gi|118135635|ref|NC_006088.2chromosome1	74.7	253	51	5	320	567	5174994	5174750	2e-36	158	4	M
s_1_1_contig191761	gi|118135635|ref|NC_006088.2chromosome1	70.17	295	71	3	405	688	5175155	5174867	2e-30	138	1	S
s_1_1_contig228600	gi|118135635|ref|NC_006088.2chromosome1	68.64	440	100	10	380	786	5175653	5175219	3e-37	161	1	S
s_1_1_contig173155	gi|118135635|ref|NC_006088.2chromosome1	75.46	326	76	2	465	790	5175560	5175239	6e-56	223	1	S
s_1_1_contig257728	gi|118135635|ref|NC_006088.2chromosome1	74.42	86	20	2	440	523	5175345	5175260	0.0006	50	20	M
s_1_1_contig254175	gi|118135635|ref|NC_006088.2chromosome1	82.98	47	8	0	89	135	5175343	5175297	0.0005	50	31	M
s_1_1_contig185905	gi|118135635|ref|NC_006088.2chromosome1	72.6	354	81	9	337	685	5175653	5175311	1e-41	176	1	S
s_1_1_contig165796	gi|118135635|ref|NC_006088.2chromosome1	72.08	240	53	6	402	640	5175621	5175395	2e-23	116	67	M
s_1_1_contig254563	gi|118135635|ref|NC_006088.2chromosome1	68.55	159	38	4	121	273	5175303	5175455	2e-05	55	47	M
s_1_1_contig194939	gi|118135635|ref|NC_006088.2chromosome1	71.72	198	48	4	530	724	5175431	5175623	7e-17	95	72	M
s_1_1_contig232800	gi|118135635|ref|NC_006088.2chromosome1	75.42	301	64	5	593	892	5175362	5175653	1e-47	196	8	M
s_1_1_contig111045	gi|118135635|ref|NC_006088.2chromosome1	77.76	2266	368	32	2089	4268	5178191	5180406	0	1793	2	S
s_1_1_contig143208	gi|118135635|ref|NC_006088.2chromosome1	72.86	1135	215	22	746	1825	5182096	5183192	0	643	3	S
s_1_1_contig249579	gi|118135635|ref|NC_006088.2chromosome1	90.91	33	3	0	500	532	5188998	5188966	0.008	46	36	M
s_1_1_contig21968	gi|118135635|ref|NC_006088.2chromosome1	72.25	1189	252	23	1663	2806	5188693	5189848	7e-176	623	3	S
s_1_1_contig191332	gi|118135635|ref|NC_006088.2chromosome1	88.89	36	4	0	493	528	5190112	5190077	0.003	48	275	M
s_1_1_contig111960	gi|118135635|ref|NC_006088.2chromosome1	73.02	2068	416	45	3992	5981	5197115	5195112	0	1139	16	M
s_1_1_contig24855	gi|118135635|ref|NC_006088.2chromosome1	93.33	30	2	0	544	573	5201435	5201464	0.006	46	25	M
s_1_1_contig19431	gi|118135635|ref|NC_006088.2chromosome1	68.09	940	243	19	12	913	5202470	5201550	6e-82	309	1	S
s_1_1_contig226178	gi|118135635|ref|NC_006088.2chromosome1	69.86	428	109	11	37	449	5202487	5202909	3e-36	159	2	M
s_1_1_contig263389	gi|118135635|ref|NC_006088.2chromosome1	80.62	2255	363	24	493	2697	5207970	5205740	0	2055	2	S
s_1_1_contig42282	gi|118135635|ref|NC_006088.2chromosome1	83.33	48	8	0	742	789	5206265	5206312	0.0003	52	162	M
s_1_1_contig246718	gi|118135635|ref|NC_006088.2chromosome1	83.33	108	16	2	590	696	5208928	5209034	3e-21	107	2949	M
s_1_1_contig136420	gi|118135635|ref|NC_006088.2chromosome1	73.02	1835	314	33	431	2154	5211982	5210218	0	1092	1	S
s_1_1_contig151348	gi|118135635|ref|NC_006088.2chromosome1	66.17	810	176	24	455	1211	5214580	5215344	7e-51	206	1	S
s_1_1_contig26826	gi|118135635|ref|NC_006088.2chromosome1	81.77	181	24	4	889	1063	5218639	5218462	1e-39	168	1	S
s_1_1_contig72838	gi|118135635|ref|NC_006088.2chromosome1	70.75	1446	327	27	1147	2546	5217081	5218476	0	666	3	S
s_1_1_contig34409	gi|118135635|ref|NC_006088.2chromosome1	85	40	6	0	628	667	5219703	5219742	0.009	46	62	M
s_1_1_contig188805	gi|118135635|ref|NC_006088.2chromosome1	71.27	2259	428	38	2810	4936	5221898	5224067	0	1177	2	S
s_1_1_contig261901	gi|118135635|ref|NC_006088.2chromosome1	73.9	364	81	5	652	1010	5224192	5224546	1e-54	219	44	M
s_1_1_contig184651	gi|118135635|ref|NC_006088.2chromosome1	68.65	654	138	17	9	637	5225310	5224699	1e-60	239	1	S
s_1_1_contig6682	gi|118135635|ref|NC_006088.2chromosome1	78.1	1087	137	28	1653	2690	5226470	5225436	0	852	1	S
s_1_1_contig81021	gi|118135635|ref|NC_006088.2chromosome1	76.07	1776	318	34	3804	5516	5231954	5230223	0	1231	4	S
s_1_1_contig119211	gi|118135635|ref|NC_006088.2chromosome1	78.9	2796	428	33	7	2685	5235323	5238073	0	2379	1	S
s_1_1_contig47760	gi|118135635|ref|NC_006088.2chromosome1	74.93	738	118	19	1	722	5239156	5238470	6e-131	471	1	S
s_1_1_contig12735	gi|118135635|ref|NC_006088.2chromosome1	76	100	23	1	1250	1349	5240895	5240993	1e-09	70	50	M
s_1_1_contig253669	gi|118135635|ref|NC_006088.2chromosome1	81.68	202	33	3	162	361	5242539	5242738	2e-45	188	2142	M
s_1_1_contig270436	gi|118135635|ref|NC_006088.2chromosome1	82.62	466	62	7	1	451	5244670	5244209	4e-127	461	1	S
s_1_1_contig9032	gi|118135635|ref|NC_006088.2chromosome1	78.28	663	126	8	397	1055	5245370	5244722	1e-147	527	1	S
s_1_1_contig3704	gi|118135635|ref|NC_006088.2chromosome1	71.1	3090	580	69	114	3052	5245705	5248632	0	1517	1	S
s_1_1_contig165766	gi|118135635|ref|NC_006088.2chromosome1	74.15	1977	405	28	1198	3089	5251249	5249294	0	1231	1	S
s_1_1_contig175952	gi|118135635|ref|NC_006088.2chromosome1	74.1	1575	315	32	1	1523	5256906	5255373	0	940	308	M
s_1_1_contig34501	gi|118135635|ref|NC_006088.2chromosome1	76.35	351	74	5	1	346	5258099	5257753	2e-62	244	1	S
s_1_1_contig49451	gi|118135635|ref|NC_006088.2chromosome1	83.22	578	81	3	35	605	5258889	5258321	1e-171	607	1	S
s_1_1_contig226562	gi|118135635|ref|NC_006088.2chromosome1	76.54	1279	232	26	292	1540	5261386	5260146	0	899	2	S
s_1_1_contig174976	gi|118135635|ref|NC_006088.2chromosome1	73.12	186	45	4	533	716	5262203	5262385	5e-18	97	31	M
s_1_1_contig277523	gi|118135635|ref|NC_006088.2chromosome1	100	27	0	0	638	664	5265951	5265977	0.0006	50	501	M
s_1_1_contig67394	gi|118135635|ref|NC_006088.2chromosome1	80.7	1601	213	27	1240	2763	5271450	5269869	0	1460	5	S
s_1_1_contig178701	gi|118135635|ref|NC_006088.2chromosome1	73.67	657	153	6	654	1294	5275926	5276578	1e-107	396	81	M
s_1_1_contig136241	gi|118135635|ref|NC_006088.2chromosome1	71	1038	200	22	76	1022	5278656	5277629	4e-141	508	3	S
s_1_1_contig249939	gi|118135635|ref|NC_006088.2chromosome1	75.85	265	63	1	562	825	5278944	5278680	6e-45	187	1	S
s_1_1_contig3376	gi|118135635|ref|NC_006088.2chromosome1	76.7	987	157	13	1442	2391	5280542	5279592	0	751	2	S
s_1_1_contig242766	gi|118135635|ref|NC_006088.2chromosome1	71.11	952	205	27	859	1756	5282857	5281922	8e-115	419	2	S
s_1_1_contig59320	gi|118135635|ref|NC_006088.2chromosome1	71.36	4088	885	69	1	3944	5284605	5288550	0	2040	2	S
s_1_1_contig228560	gi|118135635|ref|NC_006088.2chromosome1	71.65	1785	341	39	192	1926	5290861	5292530	0	911	1077	M
s_1_1_contig21903	gi|118135635|ref|NC_006088.2chromosome1	85.41	665	79	4	161	811	5295624	5296284	0	760	1	S
s_1_1_contig6463	gi|118135635|ref|NC_006088.2chromosome1	77.26	563	107	8	1706	2259	5298622	5299172	7e-115	421	4	S
s_1_1_contig280648	gi|118135635|ref|NC_006088.2chromosome1	89.29	56	6	0	500	555	5301446	5301391	1e-11	75	5642	M
s_1_1_contig115160	gi|118135635|ref|NC_006088.2chromosome1	68.68	2363	495	50	88	2317	5303112	5305362	0	921	8	M
s_1_1_contig226678	gi|118135635|ref|NC_006088.2chromosome1	84.1	390	52	6	448	835	5312313	5311932	3e-111	407	1	S
s_1_1_contig95742	gi|118135635|ref|NC_006088.2chromosome1	74.23	2216	409	44	2340	4462	5314770	5316916	0	1370	6	S
s_1_1_contig120643	gi|118135635|ref|NC_006088.2chromosome1	71.47	1041	215	20	1013	2040	5325613	5324642	3e-145	522	2	S
s_1_1_contig62875	gi|118135635|ref|NC_006088.2chromosome1	74.84	966	213	10	1567	2505	5327498	5328460	1e-177	628	5807	M
s_1_1_contig148350	gi|118135635|ref|NC_006088.2chromosome1	80.5	1282	184	21	788	2020	5334486	5333222	0	1150	20	M
s_1_1_contig151970	gi|118135635|ref|NC_006088.2chromosome1	72.69	2636	482	56	584	3127	5342939	5340450	0	1471	3	S
s_1_1_contig170570	gi|118135635|ref|NC_006088.2chromosome1	66.07	731	199	18	31	721	5343315	5344036	6e-38	163	123	M
s_1_1_contig122892	gi|118135635|ref|NC_006088.2chromosome1	73.4	936	201	15	1806	2700	5346628	5345700	2e-151	542	1	S
s_1_1_contig69858	gi|118135635|ref|NC_006088.2chromosome1	75.44	1718	303	36	2923	4570	5353264	5351596	0	1141	6	S
s_1_1_contig33065	gi|118135635|ref|NC_006088.2chromosome1	68.96	1263	287	26	25	1215	5359490	5360719	1e-135	488	1	S
s_1_1_contig123664	gi|118135635|ref|NC_006088.2chromosome1	73.37	2415	456	37	5157	7469	5363454	5361125	0	1458	259	M
s_1_1_contig133674	gi|118135635|ref|NC_006088.2chromosome1	73.3	3311	620	68	4243	7492	5377591	5374484	0	1918	3	S
s_1_1_contig27418	gi|118135635|ref|NC_006088.2chromosome1	79.66	59	10	1	312	370	5380934	5380990	0.001	50	219	M
s_1_1_contig121565	gi|118135635|ref|NC_006088.2chromosome1	72.89	2991	560	58	493	3371	5382505	5385356	0	1703	3	S
s_1_1_contig9288	gi|118135635|ref|NC_006088.2chromosome1	72.04	819	157	20	432	1206	5388879	5389669	2e-114	419	2	S
s_1_1_contig230842	gi|118135635|ref|NC_006088.2chromosome1	69.47	1212	266	32	43	1194	5393735	5394902	3e-129	468	96	M
s_1_1_contig196093	gi|118135635|ref|NC_006088.2chromosome1	72.1	1122	238	19	1014	2092	5397111	5398200	3e-167	594	1	S
s_1_1_contig87659	gi|118135635|ref|NC_006088.2chromosome1	85.57	2148	226	26	1469	3574	5400067	5402172	0	2435	4	S
s_1_1_contig259082	gi|118135635|ref|NC_006088.2chromosome1	84	50	7	1	679	727	5408728	5408679	0.0002	52	31	M
s_1_1_contig193372	gi|118135635|ref|NC_006088.2chromosome1	73.15	1259	247	28	1522	2756	5411151	5412342	0	702	2	S
s_1_1_contig276032	gi|118135635|ref|NC_006088.2chromosome1	68.26	1027	176	22	1	923	5412895	5413875	4e-115	419	1	S
s_1_1_contig111049	gi|118135635|ref|NC_006088.2chromosome1	88.25	451	41	9	1942	2383	5414325	5413878	1e-152	545	2	S
s_1_1_contig176573	gi|118135635|ref|NC_006088.2chromosome1	72.03	1491	310	32	606	2047	5417378	5418810	0	762	1	S
s_1_1_contig161389	gi|118135635|ref|NC_006088.2chromosome1	78.1	1041	178	17	396	1408	5422550	5421532	0	818	3	S
s_1_1_contig175825	gi|118135635|ref|NC_006088.2chromosome1	69.8	351	80	9	1065	1400	5423477	5423138	4e-30	138	1	S
s_1_1_contig141726	gi|118135635|ref|NC_006088.2chromosome1	75.88	1165	193	20	710	1855	5425415	5424320	0	823	1	S
s_1_1_contig65695	gi|118135635|ref|NC_006088.2chromosome1	72.43	1534	314	25	1442	2894	5432019	5433524	0	845	6	S
s_1_1_contig187645	gi|118135635|ref|NC_006088.2chromosome1	76.13	2107	367	36	125	2152	5439318	5437269	0	1492	1	S
s_1_1_contig208851	gi|118135635|ref|NC_006088.2chromosome1	87.85	724	66	9	1	721	5439333	5440037	0	888	1	S
s_1_1_contig134988	gi|118135635|ref|NC_006088.2chromosome1	73.28	2620	488	42	5	2522	5440027	5442536	0	1572	2	S
s_1_1_contig124454	gi|118135635|ref|NC_006088.2chromosome1	75.3	4794	853	72	7394	12034	5455899	5460514	0	3281	8	S
s_1_1_contig193759	gi|118135635|ref|NC_006088.2chromosome1	79.15	1314	232	16	4804	6103	5462601	5461316	0	1101	5	S
s_1_1_contig246352	gi|118135635|ref|NC_006088.2chromosome1	74.29	175	29	5	470	628	5473492	5473666	8e-21	105	9677	M
s_1_1_contig83310	gi|118135635|ref|NC_006088.2chromosome1	76.36	1992	341	32	282	2231	5484712	5482809	0	1442	7	S
s_1_1_contig116193	gi|118135635|ref|NC_006088.2chromosome1	71.77	4372	903	90	2381	6647	5491031	5486886	0	2214	309	M
s_1_1_contig108840	gi|118135635|ref|NC_006088.2chromosome1	75.8	2347	417	44	1888	4151	5495772	5498050	0	1609	3	S
s_1_1_contig67111	gi|118135635|ref|NC_006088.2chromosome1	78.7	3004	501	47	6610	9549	5512180	5509252	0	2446	5	S
s_1_1_contig132384	gi|118135635|ref|NC_006088.2chromosome1	90.12	607	53	4	1	601	5524073	5523468	0	812	2	S
s_1_1_contig193366	gi|118135635|ref|NC_006088.2chromosome1	71.99	1164	245	18	300	1438	5528848	5527741	2e-175	621	3	S
s_1_1_contig144279	gi|118135635|ref|NC_006088.2chromosome1	78.83	1875	329	26	1556	3399	5530776	5532613	0	1535	2	S
s_1_1_contig263420	gi|118135635|ref|NC_006088.2chromosome1	80.41	638	99	11	874	1503	5533174	5533793	9e-158	562	1	S
s_1_1_contig81900	gi|118135635|ref|NC_006088.2chromosome1	76.75	1570	260	30	2933	4429	5537934	5536397	0	1146	5	S
s_1_1_contig163008	gi|118135635|ref|NC_006088.2chromosome1	69.48	2772	600	63	1	2619	5542161	5544839	0	1122	1	S
s_1_1_contig184266	gi|118135635|ref|NC_006088.2chromosome1	69.68	475	94	16	73	512	5544844	5545303	3e-43	181	37	M
s_1_1_contig272182	gi|118135635|ref|NC_006088.2chromosome1	79.09	1095	171	19	21	1092	5547456	5546397	0	910	1	S
s_1_1_contig223574	gi|118135635|ref|NC_006088.2chromosome1	70.91	1413	306	35	1552	2915	5548794	5550150	1e-178	632	2	S
s_1_1_contig81839	gi|118135635|ref|NC_006088.2chromosome1	71.85	4476	951	89	11410	15721	5556343	5552013	0	2269	9	S
s_1_1_contig24411	gi|118135635|ref|NC_006088.2chromosome1	84.48	116	18	0	516	631	5571987	5571872	1e-27	129	1	S
s_1_1_contig96461	gi|118135635|ref|NC_006088.2chromosome1	85.88	85	11	1	2504	2587	5571967	5571883	6e-17	97	15015	M
s_1_1_contig209401	gi|118135635|ref|NC_006088.2chromosome1	90.7	86	8	0	1	86	5571968	5571883	3e-25	120	27848	M
s_1_1_contig21411	gi|118135635|ref|NC_006088.2chromosome1	90.79	76	6	1	309	383	5571971	5571896	1e-19	102	12416	M
s_1_1_contig119698	gi|118135635|ref|NC_006088.2chromosome1	84.07	113	14	2	3137	3245	5572012	5571900	1e-23	118	10638	M
s_1_1_contig78414	gi|118135635|ref|NC_006088.2chromosome1	83.33	90	13	1	10159	10246	5571990	5571901	9e-16	93	11499	M
s_1_1_contig277234	gi|118135635|ref|NC_006088.2chromosome1	90.62	64	6	0	736	799	5571886	5571949	8e-16	90	7730	M
s_1_1_contig208196	gi|118135635|ref|NC_006088.2chromosome1	92.86	84	4	2	1008	1089	5571887	5571970	7e-24	118	17495	M
s_1_1_contig241954	gi|118135635|ref|NC_006088.2chromosome1	87.36	87	8	2	12	95	5571901	5571987	1e-19	102	7409	M
s_1_1_contig241708	gi|118135635|ref|NC_006088.2chromosome1	82.29	96	15	1	8	101	5571901	5571996	2e-17	95	6498	M
s_1_1_contig187161	gi|118135635|ref|NC_006088.2chromosome1	75.48	261	54	3	408	659	5571752	5572011	8e-42	178	943	M
s_1_1_contig78811	gi|118135635|ref|NC_006088.2chromosome1	78.66	1818	346	15	3393	5179	5575757	5573951	0	1499	4281	M
s_1_1_contig32669	gi|118135635|ref|NC_006088.2chromosome1	76.49	689	144	9	75	760	5579193	5578520	8e-136	488	1	S
s_1_1_contig282871	gi|118135635|ref|NC_006088.2chromosome1	71.01	483	109	8	1	454	5579232	5579712	7e-59	232	1	S
s_1_1_contig262408	gi|118135635|ref|NC_006088.2chromosome1	77.11	1302	233	23	1486	2759	5580997	5579733	0	960	3	S
s_1_1_contig152855	gi|118135635|ref|NC_006088.2chromosome1	69.82	1514	318	31	121	1572	5587174	5585738	0	655	2	S
s_1_1_contig46904	gi|118135635|ref|NC_006088.2chromosome1	83.5	503	65	7	1	501	5587798	5587312	3e-145	518	1	S
s_1_1_contig179893	gi|118135635|ref|NC_006088.2chromosome1	70.51	2116	436	50	390	2428	5588680	5590684	0	948	3	S
s_1_1_contig234139	gi|118135635|ref|NC_006088.2chromosome1	65.35	1368	282	50	8	1307	5596453	5595210	1e-72	279	1	S
s_1_1_contig56495	gi|118135635|ref|NC_006088.2chromosome1	80.54	3864	639	41	74	3883	5596514	5600318	0	3496	3	S
s_1_1_contig7774	gi|118135635|ref|NC_006088.2chromosome1	75.65	694	114	16	8	677	5602382	5603044	9e-130	468	1	S
s_1_1_contig122956	gi|118135635|ref|NC_006088.2chromosome1	72.85	2022	409	45	1619	3604	5605132	5607049	0	1095	3	S
s_1_1_contig125137	gi|118135635|ref|NC_006088.2chromosome1	72.43	3554	699	77	29	3460	5607997	5611391	0	1898	1	S
s_1_1_contig106810	gi|118135635|ref|NC_006088.2chromosome1	78.68	1351	237	11	2577	3902	5613358	5614682	0	1135	3	S
s_1_1_contig75842	gi|118135635|ref|NC_006088.2chromosome1	72.77	4385	897	88	6376	10623	5622642	5626866	0	2396	5	S
s_1_1_contig102564	gi|118135635|ref|NC_006088.2chromosome1	77.23	5160	887	84	2951	7945	5638637	5633601	0	3889	3	S
s_1_1_contig263442	gi|118135635|ref|NC_006088.2chromosome1	86.11	72	9	1	3244	3314	5642971	5643042	5e-13	82	255	M
s_1_1_contig89975	gi|118135635|ref|NC_006088.2chromosome1	78.61	2043	350	26	1442	3434	5654921	5652916	0	1676	7	S
s_1_1_contig115432	gi|118135635|ref|NC_006088.2chromosome1	69.54	2183	449	64	3059	5133	5659118	5657044	0	845	3	S
s_1_1_contig272196	gi|118135635|ref|NC_006088.2chromosome1	86.67	45	3	2	47	88	5661283	5661239	0.002	48	34	M
s_1_1_contig240501	gi|118135635|ref|NC_006088.2chromosome1	81.25	64	12	0	194	257	5661303	5661240	2e-07	63	119	M
s_1_1_contig141691	gi|118135635|ref|NC_006088.2chromosome1	77.99	1549	241	28	1647	3125	5665195	5666713	0	1220	3	S
s_1_1_contig99201	gi|118135635|ref|NC_006088.2chromosome1	71.37	1949	392	37	633	2536	5671601	5669774	0	982	3	S
s_1_1_contig206273	gi|118135635|ref|NC_006088.2chromosome1	76.36	516	86	13	1	502	5675883	5675390	1e-95	354	1	S
s_1_1_contig266734	gi|118135635|ref|NC_006088.2chromosome1	72.93	399	92	7	8	395	5675868	5676261	6e-54	215	1	S
s_1_1_contig218576	gi|118135635|ref|NC_006088.2chromosome1	73.39	3266	666	66	1506	4710	5679581	5676458	0	1858	2	S
s_1_1_contig52887	gi|118135635|ref|NC_006088.2chromosome1	78.22	2043	316	38	1538	3516	5686459	5684482	0	1624	4	S
s_1_1_contig14785	gi|118135635|ref|NC_006088.2chromosome1	72.98	729	165	13	1416	2121	5689631	5688912	3e-108	398	1	S
s_1_1_contig105370	gi|118135635|ref|NC_006088.2chromosome1	75.97	2422	408	41	49	2412	5690365	5692670	0	1716	3	S
s_1_1_contig14087	gi|118135635|ref|NC_006088.2chromosome1	71.54	1128	240	33	827	1909	5699175	5700266	3e-142	511	2	S
s_1_1_contig6821	gi|118135635|ref|NC_006088.2chromosome1	80.62	1656	259	18	345	1964	5703754	5702125	0	1514	2	S
s_1_1_contig129473	gi|118135635|ref|NC_006088.2chromosome1	79.39	1174	185	17	1	1147	5705530	5704387	0	1002	1	S
s_1_1_contig147238	gi|118135635|ref|NC_006088.2chromosome1	79.64	1817	278	28	1354	3129	5707437	5709202	0	1566	2	S
s_1_1_contig44734	gi|118135635|ref|NC_006088.2chromosome1	81.03	58	9	1	156	211	5712038	5712095	4e-05	54	127	M
s_1_1_contig67238	gi|118135635|ref|NC_006088.2chromosome1	73.65	3321	615	53	3780	7066	5717001	5713907	0	2040	3	S
s_1_1_contig14497	gi|118135635|ref|NC_006088.2chromosome1	81.47	1058	166	9	1	1036	5721500	5720451	0	1011	1	S
s_1_1_contig149182	gi|118135635|ref|NC_006088.2chromosome1	79.62	1791	291	28	1	1770	5724799	5723062	0	1525	2	S
s_1_1_contig112940	gi|118135635|ref|NC_006088.2chromosome1	72.67	1361	286	27	1002	2322	5726972	5728286	0	733	3	S
s_1_1_contig230189	gi|118135635|ref|NC_006088.2chromosome1	94.44	54	2	1	1656	1708	5732976	5732923	9e-13	81	28098	M
s_1_1_contig66554	gi|118135635|ref|NC_006088.2chromosome1	76.26	3037	518	52	10924	13838	5736786	5733831	0	2176	12	S
s_1_1_contig2158	gi|118135635|ref|NC_006088.2chromosome1	100	21	0	0	320	340	5736325	5736305	1	39	7	M
s_1_1_contig62784	gi|118135635|ref|NC_006088.2chromosome1	77.87	3050	516	39	207	3216	5757349	5754419	0	2425	3	S
s_1_1_contig67228	gi|118135635|ref|NC_006088.2chromosome1	80.43	2652	407	40	2565	5150	5761794	5759189	0	2363	4057	M
s_1_1_contig157407	gi|118135635|ref|NC_006088.2chromosome1	88.64	44	4	1	1750	1793	5761268	5761310	0.0001	54	27	M
s_1_1_contig267011	gi|118135635|ref|NC_006088.2chromosome1	81.15	1040	142	14	3	1013	5773885	5772871	0	978	1	S
s_1_1_contig50622	gi|118135635|ref|NC_006088.2chromosome1	79.21	7123	1063	114	2700	9578	5765925	5772873	0	6031	272	M
s_1_1_contig232017	gi|118135635|ref|NC_006088.2chromosome1	80.15	1819	280	28	8	1782	5775659	5773878	0	1600	1	S
s_1_1_contig113416	gi|118135635|ref|NC_006088.2chromosome1	71.73	3275	614	68	34	3173	5775678	5778775	0	1707	3	S
s_1_1_contig102310	gi|118135635|ref|NC_006088.2chromosome1	77.41	3386	574	59	2792	6126	5785162	5781917	0	2563	3	S
s_1_1_contig227669	gi|118135635|ref|NC_006088.2chromosome1	84.06	847	103	12	56	887	5791657	5790828	0	893	1	S
s_1_1_contig95009	gi|118135635|ref|NC_006088.2chromosome1	69.65	2936	622	70	6	2832	5788077	5790852	0	1205	1	S
s_1_1_contig164379	gi|118135635|ref|NC_006088.2chromosome1	68.95	1417	327	45	375	1739	5791926	5793281	2e-130	471	2	S
s_1_1_contig85250	gi|118135635|ref|NC_006088.2chromosome1	72.75	4271	775	101	7571	11591	5800256	5796125	0	2351	5	S
s_1_1_contig46333	gi|118135635|ref|NC_006088.2chromosome1	90.62	32	3	0	209	240	5801678	5801709	0.022	45	22	M
s_1_1_contig81341	gi|118135635|ref|NC_006088.2chromosome1	75.37	3678	628	74	65	3606	5810236	5806701	0	2466	1	S
s_1_1_contig195016	gi|118135635|ref|NC_006088.2chromosome1	71.65	3855	792	81	586	4322	5813916	5810245	0	1930	12	M
s_1_1_contig267186	gi|118135635|ref|NC_006088.2chromosome1	70.07	1373	281	29	685	1986	5816853	5815540	3e-172	610	2	S
s_1_1_contig48160	gi|118135635|ref|NC_006088.2chromosome1	96.15	26	1	0	852	877	5819012	5819037	0.15	43	52	M
s_1_1_contig66691	gi|118135635|ref|NC_006088.2chromosome1	75.3	3704	684	63	3488	7045	5838564	5834946	0	2479	9	S
s_1_1_contig245376	gi|118135635|ref|NC_006088.2chromosome1	77.19	1026	177	14	79	1085	5842889	5841902	0	783	93	M
s_1_1_contig182576	gi|118135635|ref|NC_006088.2chromosome1	72.12	2113	422	48	80	2080	5843924	5845981	0	1090	2	S
s_1_1_contig273804	gi|118135635|ref|NC_006088.2chromosome1	74.48	768	130	11	54	764	5846026	5846784	8e-143	511	2	S
s_1_1_contig158145	gi|118135635|ref|NC_006088.2chromosome1	71.04	777	167	18	1028	1773	5848720	5849469	5e-96	358	1	S
s_1_1_contig239421	gi|118135635|ref|NC_006088.2chromosome1	74.24	1145	228	19	65	1186	5849984	5851084	0	710	2	S
s_1_1_contig108394	gi|118135635|ref|NC_006088.2chromosome1	76.64	2706	430	57	1409	4018	5861597	5864196	0	1956	6	S
s_1_1_contig230311	gi|118135635|ref|NC_006088.2chromosome1	76.7	1056	216	13	208	1242	5870772	5871818	0	764	2	S
s_1_1_contig116198	gi|118135635|ref|NC_006088.2chromosome1	75.87	4409	774	93	3391	7659	5881973	5877715	0	2996	160	M
s_1_1_contig117216	gi|118135635|ref|NC_006088.2chromosome1	79.7	3955	620	69	1676	5553	5893658	5889810	0	3366	5	S
s_1_1_contig233772	gi|118135635|ref|NC_006088.2chromosome1	78.69	1422	231	21	63	1454	5900019	5898640	0	1169	1	S
s_1_1_contig56308	gi|118135635|ref|NC_006088.2chromosome1	78.4	1625	278	26	2591	4167	5902717	5904316	0	1297	3	S
s_1_1_contig221029	gi|118135635|ref|NC_006088.2chromosome1	76.29	2821	448	50	3063	5782	5906883	5909583	0	2046	2	S
s_1_1_contig83456	gi|118135635|ref|NC_006088.2chromosome1	73.99	5779	1129	97	16	5590	5915328	5909720	0	3546	1	S
s_1_1_contig135068	gi|118135635|ref|NC_006088.2chromosome1	79.95	399	67	5	13	402	5917475	5917081	1e-93	349	1	S
s_1_1_contig95149	gi|118135635|ref|NC_006088.2chromosome1	73.66	4898	934	89	6703	11448	5924180	5928873	0	2937	8	S
s_1_1_contig251344	gi|118135635|ref|NC_006088.2chromosome1	79.03	62	8	2	447	504	5937966	5937906	0.0005	50	110	M
s_1_1_contig106714	gi|118135635|ref|NC_006088.2chromosome1	72.71	4173	797	89	3319	7329	5944542	5948534	0	2298	3	S
s_1_1_contig166196	gi|118135635|ref|NC_006088.2chromosome1	77.64	2853	458	43	27	2823	5948968	5951696	0	2237	3	S
s_1_1_contig241787	gi|118135635|ref|NC_006088.2chromosome1	74.91	283	61	5	1838	2112	5960637	5960357	6e-42	178	410	M
s_1_1_contig114153	gi|118135635|ref|NC_006088.2chromosome1	80.72	166	27	3	1708	1871	5960643	5960481	1e-32	147	6	M
s_1_1_contig150021	gi|118135635|ref|NC_006088.2chromosome1	75	100	22	2	1122	1220	5960582	5960485	2e-07	63	230	M
s_1_1_contig241910	gi|118135635|ref|NC_006088.2chromosome1	83.51	97	13	2	688	783	5960579	5960485	5e-18	97	40730	M
s_1_1_contig259724	gi|118135635|ref|NC_006088.2chromosome1	83.08	65	11	0	252	316	5960556	5960492	1e-09	68	14001	M
s_1_1_contig228818	gi|118135635|ref|NC_006088.2chromosome1	77.33	150	23	5	1538	1683	5960637	5960495	2e-20	105	16330	M
s_1_1_contig245082	gi|118135635|ref|NC_006088.2chromosome1	84	100	15	1	470	569	5960458	5960556	8e-21	105	53163	M
s_1_1_contig244602	gi|118135635|ref|NC_006088.2chromosome1	80.99	121	19	3	371	489	5960464	5960582	6e-21	105	3592	M
s_1_1_contig257058	gi|118135635|ref|NC_006088.2chromosome1	82	100	15	2	1	99	5960488	5960585	4e-17	93	9515	M
s_1_1_contig210940	gi|118135635|ref|NC_006088.2chromosome1	77.14	175	36	3	7	179	5960464	5960636	1e-26	125	1	S
s_1_1_contig228249	gi|118135635|ref|NC_006088.2chromosome1	77.91	163	33	2	1	162	5960477	5960637	2e-26	125	4	M
s_1_1_contig256427	gi|118135635|ref|NC_006088.2chromosome1	81.29	155	26	3	2	155	5960485	5960637	1e-30	138	56	M
s_1_1_contig260753	gi|118135635|ref|NC_006088.2chromosome1	82.06	3100	435	40	5227	8267	5960646	5963683	0	3012	5	S
s_1_1_contig174148	gi|118135635|ref|NC_006088.2chromosome1	81.48	54	7	3	311	361	5969577	5969524	0.087	43	34	M
s_1_1_contig84402	gi|118135635|ref|NC_006088.2chromosome1	76.82	3270	558	50	4798	8017	5971573	5974692	0	2435	3	S
s_1_1_contig13686	gi|118135635|ref|NC_006088.2chromosome1	81.82	55	9	1	2051	2104	5979410	5979356	0.0006	52	55	M
s_1_1_contig71646	gi|118135635|ref|NC_006088.2chromosome1	74.16	8650	1601	171	5831	14231	5982687	5990951	0	5324	5	S
s_1_1_contig13223	gi|118135635|ref|NC_006088.2chromosome1	74.68	4100	677	77	2033	5914	5994424	5998380	0	2693	3	S
s_1_1_contig249830	gi|118135635|ref|NC_006088.2chromosome1	79.56	411	44	11	102	499	5998530	5998913	3e-94	349	1	S
s_1_1_contig81124	gi|118135635|ref|NC_006088.2chromosome1	77.6	8611	1274	139	2506	10736	6002352	6010687	0	6796	4	S
s_1_1_contig173533	gi|118135635|ref|NC_006088.2chromosome1	79.5	3664	526	60	61	3649	6012916	6016429	0	3155	1	S
s_1_1_contig28877	gi|118135635|ref|NC_006088.2chromosome1	87.5	32	4	0	72	103	6021834	6021865	0.39	41	24	M
s_1_1_contig78478	gi|118135635|ref|NC_006088.2chromosome1	81.18	2237	347	28	2406	4610	6020557	6022751	0	2076	4	S
s_1_1_contig96484	gi|118135635|ref|NC_006088.2chromosome1	77.04	5052	830	86	1544	6418	6037305	6032407	0	3791	5	S
s_1_1_contig225899	gi|118135635|ref|NC_006088.2chromosome1	75.64	1515	285	21	249	1727	6039040	6040506	0	1050	1	S
s_1_1_contig239304	gi|118135635|ref|NC_006088.2chromosome1	76.81	914	153	14	6	876	6041743	6040846	0	682	1	S
s_1_1_contig173479	gi|118135635|ref|NC_006088.2chromosome1	75.13	1162	217	21	665	1817	6042927	6041829	0	764	2	S
s_1_1_contig271765	gi|118135635|ref|NC_006088.2chromosome1	80.53	647	94	8	454	1082	6044362	6043730	4e-167	592	1	S
s_1_1_contig171595	gi|118135635|ref|NC_006088.2chromosome1	75.93	1944	338	30	2767	4629	6047121	6045227	0	1379	2	S
s_1_1_contig52755	gi|118135635|ref|NC_006088.2chromosome1	74.16	4705	891	98	294	4810	6057339	6052772	0	2854	3	S
s_1_1_contig91725	gi|118135635|ref|NC_006088.2chromosome1	76.47	3188	517	56	740	3845	6064140	6061104	0	2325	3	S
s_1_1_contig273659	gi|118135635|ref|NC_006088.2chromosome1	65.29	700	137	18	4	654	6065491	6066133	1e-43	181	1	S
s_1_1_contig36043	gi|118135635|ref|NC_006088.2chromosome1	71.85	1318	268	24	62	1337	6066261	6067517	0	690	1	S
s_1_1_contig140744	gi|118135635|ref|NC_006088.2chromosome1	78.6	2411	361	40	8	2337	6067518	6069854	0	1981	2	S
s_1_1_contig3664	gi|118135635|ref|NC_006088.2chromosome1	86.81	1615	161	17	9	1604	6073610	6072029	0	1923	1	S
s_1_1_contig44706	gi|118135635|ref|NC_006088.2chromosome1	95.65	896	33	4	2	893	6073861	6074754	0	1427	1	S
s_1_1_contig30389	gi|118135635|ref|NC_006088.2chromosome1	98.73	550	7	0	1	550	6075420	6074871	0	960	1	S
s_1_1_contig20395	gi|118135635|ref|NC_006088.2chromosome1	89.9	2138	150	20	1	2106	6078179	6076076	0	2852	1	S
s_1_1_contig126890	gi|118135635|ref|NC_006088.2chromosome1	79.21	2919	391	54	2108	4947	6080497	6083278	0	2479	3	S
s_1_1_contig224866	gi|118135635|ref|NC_006088.2chromosome1	80.48	840	139	12	11	833	6084447	6085278	0	744	2	S
s_1_1_contig261505	gi|118135635|ref|NC_006088.2chromosome1	78.5	1400	230	21	1326	2701	6090589	6089237	0	1137	3	S
s_1_1_contig77508	gi|118135635|ref|NC_006088.2chromosome1	74.78	2593	464	58	3507	6055	6097550	6099996	0	1638	9	S
s_1_1_contig239213	gi|118135635|ref|NC_006088.2chromosome1	80.95	105	15	2	234	333	6125155	6125259	4e-17	95	15255	M
s_1_1_contig72262	gi|118135635|ref|NC_006088.2chromosome1	75.43	1970	376	38	3194	5108	6127238	6125322	0	1297	3627	M
s_1_1_contig263662	gi|118135635|ref|NC_006088.2chromosome1	77.29	709	119	15	1091	1775	6131579	6130889	5e-146	524	3	S
s_1_1_contig119752	gi|118135635|ref|NC_006088.2chromosome1	79.36	625	115	8	251	871	6133934	6134548	2e-145	522	2	S
s_1_1_contig146922	gi|118135635|ref|NC_006088.2chromosome1	71.23	723	169	15	644	1336	6137324	6136611	2e-89	334	1	S
s_1_1_contig16443	gi|118135635|ref|NC_006088.2chromosome1	76.84	842	132	18	1	814	6139114	6138308	4e-174	616	1	S
s_1_1_contig215644	gi|118135635|ref|NC_006088.2chromosome1	73.12	2031	419	40	656	2625	6141784	6139820	0	1135	2	S
s_1_1_contig63717	gi|118135635|ref|NC_006088.2chromosome1	77.11	8245	1334	156	511	8480	6143597	6151563	0	6157	4	S
s_1_1_contig120916	gi|118135635|ref|NC_006088.2chromosome1	74.33	2006	375	43	27	1961	6156456	6158392	0	1229	3	S
s_1_1_contig122684	gi|118135635|ref|NC_006088.2chromosome1	82.37	346	54	2	864	1208	6163368	6163707	8e-93	347	1	S
s_1_1_contig120226	gi|118135635|ref|NC_006088.2chromosome1	68.42	2476	505	74	485	2806	6164829	6167181	0	856	222	M
s_1_1_contig115075	gi|118135635|ref|NC_006088.2chromosome1	68.6	2194	447	53	140	2274	6167369	6169379	0	830	6	S
s_1_1_contig148324	gi|118135635|ref|NC_006088.2chromosome1	69.5	2026	372	56	1336	3279	6182891	6184752	0	838	3	M
s_1_1_contig217481	gi|118135635|ref|NC_006088.2chromosome1	75.76	330	62	5	712	1038	6186286	6186600	3e-57	228	2	S
s_1_1_contig111601	gi|118135635|ref|NC_006088.2chromosome1	73.47	1357	238	25	3395	4671	6193435	6192121	0	821	5	S
s_1_1_contig133526	gi|118135635|ref|NC_006088.2chromosome1	72.39	786	163	20	150	912	6201055	6200301	1e-107	398	3	S
s_1_1_contig118402	gi|118135635|ref|NC_006088.2chromosome1	71.48	915	201	19	23	903	6201232	6202120	2e-121	443	2	S
s_1_1_contig195748	gi|118135635|ref|NC_006088.2chromosome1	96.43	28	1	0	1063	1090	6202695	6202722	0.012	46	366	M
s_1_1_contig242652	gi|118135635|ref|NC_006088.2chromosome1	83.33	54	5	2	192	243	6214606	6214657	0.0003	52	21	M
s_1_1_contig210528	gi|118135635|ref|NC_006088.2chromosome1	68.72	406	90	11	758	1132	6218711	6219110	1e-31	143	10101	M
s_1_1_contig4858	gi|118135635|ref|NC_006088.2chromosome1	73.41	410	74	7	436	820	6223429	6223030	9e-63	248	1	S
s_1_1_contig74527	gi|118135635|ref|NC_006088.2chromosome1	70.23	1542	351	29	340	1807	6223581	6225088	0	679	2	S
s_1_1_contig105042	gi|118135635|ref|NC_006088.2chromosome1	68.87	5044	1124	139	178	5010	6233612	6238420	0	1793	6	M
s_1_1_contig182735	gi|118135635|ref|NC_006088.2chromosome1	70.56	574	129	13	1011	1549	6252159	6251591	2e-64	251	2	S
s_1_1_contig119253	gi|118135635|ref|NC_006088.2chromosome1	71.19	1333	270	36	3741	5000	6252434	6253725	7e-173	614	5	S
s_1_1_contig261761	gi|118135635|ref|NC_006088.2chromosome1	74.01	581	122	13	2520	3096	6257740	6257185	6e-89	334	1	S
s_1_1_contig73369	gi|118135635|ref|NC_006088.2chromosome1	72.08	4624	912	100	839	5231	6269098	6264623	0	2410	1	S
s_1_1_contig58948	gi|118135635|ref|NC_006088.2chromosome1	67.72	1295	297	43	724	1925	6270254	6271520	1e-98	367	1099	M
s_1_1_contig57586	gi|118135635|ref|NC_006088.2chromosome1	70.24	1818	355	55	56	1763	6274977	6276718	0	760	1	S
s_1_1_contig264600	gi|118135635|ref|NC_006088.2chromosome1	74.83	1148	211	28	326	1446	6285106	6284010	0	711	2	S
s_1_1_contig94428	gi|118135635|ref|NC_006088.2chromosome1	72.67	2060	404	46	1230	3197	6286851	6288843	0	1113	4	S
s_1_1_contig207198	gi|118135635|ref|NC_006088.2chromosome1	82.5	80	12	2	22	99	6296572	6296493	1e-11	75	1354	M
s_1_1_contig118818	gi|118135635|ref|NC_006088.2chromosome1	72.97	1968	411	33	3849	5729	6303717	6305650	0	1112	4	S
s_1_1_contig143139	gi|118135635|ref|NC_006088.2chromosome1	74.34	3129	592	63	641	3705	6305944	6308925	0	1929	1	S
s_1_1_contig266044	gi|118135635|ref|NC_006088.2chromosome1	69.53	1234	281	33	94	1297	6309020	6310188	3e-129	468	1	S
s_1_1_contig193094	gi|118135635|ref|NC_006088.2chromosome1	83.07	254	38	3	126	374	6311368	6311621	1e-65	255	1	S
s_1_1_contig217765	gi|118135635|ref|NC_006088.2chromosome1	74.43	442	88	9	2599	3028	6314713	6315141	2e-69	269	1	S
s_1_1_contig90061	gi|118135635|ref|NC_006088.2chromosome1	72.92	816	169	22	61	833	6315204	6316010	1e-115	423	2	S
s_1_1_contig12918	gi|118135635|ref|NC_006088.2chromosome1	73.54	359	82	3	1732	2080	6316540	6316895	1e-53	217	1	S
s_1_1_contig97053	gi|118135635|ref|NC_006088.2chromosome1	68.31	890	187	26	866	1713	6319341	6318505	3e-79	302	1	S
s_1_1_contig146016	gi|118135635|ref|NC_006088.2chromosome1	89.02	264	26	1	52	312	6320830	6320567	5e-92	343	2	S
s_1_1_contig253794	gi|118135635|ref|NC_006088.2chromosome1	76.94	412	71	9	1	400	6321242	6320843	2e-78	297	1	S
s_1_1_contig207114	gi|118135635|ref|NC_006088.2chromosome1	75.87	315	54	9	1	306	6321144	6320843	1e-50	205	807	M
s_1_1_contig46519	gi|118135635|ref|NC_006088.2chromosome1	73.01	163	38	3	756	918	6321375	6321219	3e-15	88	30	M
s_1_1_contig128693	gi|118135635|ref|NC_006088.2chromosome1	83.8	679	89	9	4208	4877	6322272	6321606	0	708	2	S
s_1_1_contig268044	gi|118135635|ref|NC_006088.2chromosome1	80.57	700	114	10	1027	1716	6321594	6322281	4e-176	625	5	M
s_1_1_contig244449	gi|118135635|ref|NC_006088.2chromosome1	77.58	446	77	11	164	605	6326450	6326024	1e-86	325	1	S
s_1_1_contig160421	gi|118135635|ref|NC_006088.2chromosome1	71.99	1610	336	26	3575	5108	6328202	6326632	0	857	4	S
s_1_1_contig139611	gi|118135635|ref|NC_006088.2chromosome1	71.33	2522	504	51	2267	4621	6329145	6326676	0	1256	1	S
s_1_1_contig108776	gi|118135635|ref|NC_006088.2chromosome1	71.42	4094	804	94	188	4064	6335424	6331480	0	2015	2	S
s_1_1_contig225185	gi|118135635|ref|NC_006088.2chromosome1	66.44	1347	266	32	1	1263	6335513	6336757	2e-113	416	2	S
s_1_1_contig195024	gi|118135635|ref|NC_006088.2chromosome1	75.93	1134	198	21	755	1858	6337744	6338832	0	787	2282	M
s_1_1_contig67351	gi|118135635|ref|NC_006088.2chromosome1	72.48	2722	545	65	8856	11453	6350283	6352924	0	1424	5	S
s_1_1_contig146541	gi|118135635|ref|NC_006088.2chromosome1	75.75	433	73	12	131	543	6360753	6360333	1e-73	282	362	M
s_1_1_contig18763	gi|118135635|ref|NC_006088.2chromosome1	80.1	191	35	3	361	549	6360526	6360337	9e-38	163	453	M
s_1_1_contig217952	gi|118135635|ref|NC_006088.2chromosome1	85.37	82	9	1	1809	1890	6360510	6360432	2e-16	93	25898	M
s_1_1_contig199891	gi|118135635|ref|NC_006088.2chromosome1	81.51	119	18	2	9518	9636	6360345	6360459	3e-21	111	16049	M
s_1_1_contig137131	gi|118135635|ref|NC_006088.2chromosome1	77.95	127	19	5	3021	3139	6360352	6360477	3e-15	90	7244	M
s_1_1_contig241224	gi|118135635|ref|NC_006088.2chromosome1	81.82	143	19	5	590	729	6360343	6360481	1e-26	125	1	S
s_1_1_contig245029	gi|118135635|ref|NC_006088.2chromosome1	82.5	160	23	3	800	958	6360358	6360513	3e-35	154	582	M
s_1_1_contig256124	gi|118135635|ref|NC_006088.2chromosome1	80	105	14	2	4	101	6360687	6360583	3e-17	93	2564	M
s_1_1_contig140668	gi|118135635|ref|NC_006088.2chromosome1	84.78	92	11	2	31	119	6360628	6360719	2e-17	97	14697	M
s_1_1_contig176267	gi|118135635|ref|NC_006088.2chromosome1	93.33	30	2	0	559	588	6362745	6362774	0.021	46	287	M
s_1_1_contig76047	gi|118135635|ref|NC_006088.2chromosome1	73.49	4221	754	93	1242	5308	6371024	6367015	0	2477	12	S
s_1_1_contig89759	gi|118135635|ref|NC_006088.2chromosome1	81.08	259	43	3	3550	3803	6373065	6372808	6e-60	239	1	S
s_1_1_contig57170	gi|118135635|ref|NC_006088.2chromosome1	83.29	1382	166	22	1774	3123	6378419	6379767	0	1411	4	M
s_1_1_contig113517	gi|118135635|ref|NC_006088.2chromosome1	71.64	2391	450	71	3391	5703	6384864	6387104	0	1141	3	S
s_1_1_contig36629	gi|118135635|ref|NC_006088.2chromosome1	88.89	36	4	0	1106	1141	6387782	6387747	0.004	48	87	M
s_1_1_contig231789	gi|118135635|ref|NC_006088.2chromosome1	67.68	792	162	23	44	762	6387412	6388182	2e-65	255	1	S
s_1_1_contig156527	gi|118135635|ref|NC_006088.2chromosome1	73.28	685	137	12	2246	2901	6389116	6388449	5e-108	398	1	S
s_1_1_contig158162	gi|118135635|ref|NC_006088.2chromosome1	70.22	2206	430	72	1779	3876	6391418	6393504	0	897	4	S
s_1_1_contig122859	gi|118135635|ref|NC_006088.2chromosome1	74.52	420	76	8	112	509	6398580	6398990	4e-69	268	3	S
s_1_1_contig12716	gi|118135635|ref|NC_006088.2chromosome1	77.76	616	104	12	145	737	6401149	6401754	2e-130	470	1	S
s_1_1_contig41664	gi|118135635|ref|NC_006088.2chromosome1	92.59	27	2	0	3	29	6406681	6406707	0.25	41	17	M
s_1_1_contig69891	gi|118135635|ref|NC_006088.2chromosome1	69.02	3108	671	81	1011	3976	6404308	6407265	0	1162	7	S
s_1_1_contig95022	gi|118135635|ref|NC_006088.2chromosome1	70.23	1411	321	39	2984	4346	6429358	6430717	2e-158	565	6	S
s_1_1_contig50354	gi|118135635|ref|NC_006088.2chromosome1	76.04	555	108	10	1772	2312	6435736	6435193	1e-102	379	4	S
s_1_1_contig92649	gi|118135635|ref|NC_006088.2chromosome1	72.7	2736	480	64	14	2542	6444500	6441825	0	1519	8	M
s_1_1_contig59644	gi|118135635|ref|NC_006088.2chromosome1	83.3	581	90	3	5242	5817	6445647	6445069	1e-169	603	1	S
s_1_1_contig34755	gi|118135635|ref|NC_006088.2chromosome1	85.37	41	6	0	140	180	6448691	6448651	0.002	48	104	M
s_1_1_contig257190	gi|118135635|ref|NC_006088.2chromosome1	93.1	29	2	0	1	29	6456638	6456666	0.019	45	86	M
s_1_1_contig128724	gi|118135635|ref|NC_006088.2chromosome1	76.85	2294	387	45	3602	5833	6461192	6463403	0	1671	861	M
s_1_1_contig85477	gi|118135635|ref|NC_006088.2chromosome1	71.48	2770	505	77	5734	8389	6474065	6476663	0	1344	35	M
s_1_1_contig152570	gi|118135635|ref|NC_006088.2chromosome1	93.55	31	2	0	467	497	6484371	6484341	0.004	48	96	M
s_1_1_contig76114	gi|118135635|ref|NC_006088.2chromosome1	68.29	3510	759	98	6655	9993	6496942	6493616	0	1189	8	S
s_1_1_contig271191	gi|118135635|ref|NC_006088.2chromosome1	72.01	1029	218	17	110	1074	6506437	6507459	2e-152	544	2	S
s_1_1_contig200697	gi|118135635|ref|NC_006088.2chromosome1	84.44	45	7	0	60	104	6508881	6508837	0.0005	50	54	M
s_1_1_contig182905	gi|118135635|ref|NC_006088.2chromosome1	76.43	1523	267	29	177	1655	6507510	6508984	0	1081	1	S
s_1_1_contig66464	gi|118135635|ref|NC_006088.2chromosome1	69.21	2108	428	70	3214	5221	6511321	6509335	0	760	2	S
s_1_1_contig277448	gi|118135635|ref|NC_006088.2chromosome1	85.25	61	7	2	1646	1704	6511516	6511456	3e-07	63	26	M
s_1_1_contig136720	gi|118135635|ref|NC_006088.2chromosome1	71.24	831	190	20	106	918	6513664	6514463	9e-102	376	326	M
s_1_1_contig213699	gi|118135635|ref|NC_006088.2chromosome1	91.43	35	3	0	487	521	6516345	6516311	0.0005	50	38	M
s_1_1_contig281378	gi|118135635|ref|NC_006088.2chromosome1	86.67	105	14	0	495	599	6516695	6516799	2e-27	127	3	M
s_1_1_contig279456	gi|118135635|ref|NC_006088.2chromosome1	86.54	156	20	1	730	884	6516646	6516801	7e-44	183	2725	M
s_1_1_contig162265	gi|118135635|ref|NC_006088.2chromosome1	76.7	558	88	11	2466	3010	6521138	6521666	4e-111	408	2	S
s_1_1_contig111179	gi|118135635|ref|NC_006088.2chromosome1	66.15	1344	331	42	2340	3632	6524355	6523085	5e-77	295	3	S
s_1_1_contig196771	gi|118135635|ref|NC_006088.2chromosome1	78.9	109	20	2	56	161	6526918	6526810	3e-15	88	2601	M
s_1_1_contig136379	gi|118135635|ref|NC_006088.2chromosome1	79.07	535	84	11	2155	2670	6530780	6531305	3e-119	435	1572	M
s_1_1_contig239354	gi|118135635|ref|NC_006088.2chromosome1	69.16	856	185	33	188	1005	6532744	6533558	4e-72	277	30	M
s_1_1_contig205302	gi|118135635|ref|NC_006088.2chromosome1	75.28	445	90	7	64	502	6534177	6533747	4e-77	293	1	S
s_1_1_contig115493	gi|118135635|ref|NC_006088.2chromosome1	74.08	517	81	19	82	575	6534212	6534698	4e-76	291	1	S
s_1_1_contig145420	gi|118135635|ref|NC_006088.2chromosome1	71.68	731	162	13	1742	2437	6535873	6536593	7e-99	367	1	S
s_1_1_contig58533	gi|118135635|ref|NC_006088.2chromosome1	72.78	1058	205	28	2369	3389	6537715	6536704	3e-156	558	2	S
s_1_1_contig77256	gi|118135635|ref|NC_006088.2chromosome1	70.13	2959	597	80	6996	9820	6542113	6539308	0	1249	6	S
s_1_1_contig104585	gi|118135635|ref|NC_006088.2chromosome1	69.33	6628	1329	188	3142	9488	6554064	6560268	0	2574	5	S
s_1_1_contig144990	gi|118135635|ref|NC_006088.2chromosome1	70.94	320	70	6	134	450	6561316	6561615	2e-34	152	1	S
s_1_1_contig128197	gi|118135635|ref|NC_006088.2chromosome1	72.71	1103	204	17	1273	2352	6569391	6568363	0	643	1	S
s_1_1_contig264582	gi|118135635|ref|NC_006088.2chromosome1	65.89	1800	395	55	405	2098	6573720	6572034	4e-117	428	3	S
s_1_1_contig77842	gi|118135635|ref|NC_006088.2chromosome1	70.05	935	199	27	8185	9086	6583297	6584183	5e-101	376	5	M
s_1_1_contig232507	gi|118135635|ref|NC_006088.2chromosome1	72.22	828	160	20	351	1169	6585114	6585880	6e-118	430	2	S
s_1_1_contig279418	gi|118135635|ref|NC_006088.2chromosome1	86.36	44	6	0	119	162	6592611	6592654	6e-05	54	37	M
s_1_1_contig87009	gi|118135635|ref|NC_006088.2chromosome1	78.55	550	49	17	6125	6650	6592263	6592767	3e-122	446	9	S
s_1_1_contig98670	gi|118135635|ref|NC_006088.2chromosome1	86.67	60	7	1	8162	8220	6594116	6594057	8e-09	70	186	M
s_1_1_contig275986	gi|118135635|ref|NC_006088.2chromosome1	86.96	46	4	1	941	984	6594104	6594059	7e-05	54	131	M
s_1_1_contig276180	gi|118135635|ref|NC_006088.2chromosome1	78.46	65	13	1	1242	1305	6594123	6594059	0.0003	52	93	M
s_1_1_contig83887	gi|118135635|ref|NC_006088.2chromosome1	93.75	48	3	0	2	49	6594057	6594104	3e-10	73	4875	M
s_1_1_contig209221	gi|118135635|ref|NC_006088.2chromosome1	88.24	68	8	0	6	73	6594051	6594118	5e-15	88	9326	M
s_1_1_contig213377	gi|118135635|ref|NC_006088.2chromosome1	90.91	66	6	0	8	73	6594057	6594122	7e-17	93	11933	M
s_1_1_contig199806	gi|118135635|ref|NC_006088.2chromosome1	65.54	1007	235	25	1008	1982	6597292	6596366	6e-61	241	2	S
s_1_1_contig271486	gi|118135635|ref|NC_006088.2chromosome1	72.05	601	127	13	600	1190	6606845	6606276	1e-80	306	1	S
s_1_1_contig204192	gi|118135635|ref|NC_006088.2chromosome1	82.41	904	142	6	9	909	6609113	6608224	0	902	1	S
s_1_1_contig50132	gi|118135635|ref|NC_006088.2chromosome1	75.33	1654	308	36	4448	6058	6615809	6617405	0	1072	7	S
s_1_1_contig117225	gi|118135635|ref|NC_006088.2chromosome1	78.7	1549	246	26	2363	3878	6630404	6628907	0	1265	4	S
s_1_1_contig261937	gi|118135635|ref|NC_006088.2chromosome1	69.72	1126	249	20	7819	8926	6636863	6637914	4e-134	486	3	S
s_1_1_contig87517	gi|118135635|ref|NC_006088.2chromosome1	75.08	2861	511	56	15610	18378	6644935	6642185	0	1874	11	S
s_1_1_contig106519	gi|118135635|ref|NC_006088.2chromosome1	72.07	3992	773	82	19	3841	6663174	6666992	0	2111	1	S
s_1_1_contig61603	gi|118135635|ref|NC_006088.2chromosome1	72.78	2502	453	61	13643	16035	6676096	6673714	0	1373	12	S
s_1_1_contig278071	gi|118135635|ref|NC_006088.2chromosome1	82.29	96	16	1	629	723	6677270	6677175	6e-17	93	7647	M
[truncated: 281,027+ more rows]

## Sheet: SMACvsZFConsolidatedSorted
Table S2-B T. guttata align
Query	Hit/Subject Chromosome	% Identity	Align Length	Mismatches	Gaps	q-start	q-end	hit-start	hit-end	evalue	bitscore	Total hits	Single or Multi Chromosome
s_1_1_contig162773	gi|224381666|ref|NC_011462.1chromosome1	78.18	220	31	5	2151	2362	443	233	1e-40	174	1	S
s_1_1_contig159368	gi|224381666|ref|NC_011462.1chromosome1	82.61	46	8	0	124	169	32973	33018	0.005	48	320	M
s_1_1_contig92067	gi|224381666|ref|NC_011462.1chromosome1	78.52	647	85	14	374	1005	38497	39104	5e-146	526	2	S
s_1_1_contig152309	gi|224381666|ref|NC_011462.1chromosome1	100	25	0	0	301	325	45453	45429	0.017	46	148	M
s_1_1_contig99955	gi|224381666|ref|NC_011462.1chromosome1	75.72	1215	211	24	17289	18492	51266	50125	0	829	11	S
s_1_1_contig210916	gi|224381666|ref|NC_011462.1chromosome1	81.67	60	9	1	609	666	62436	62495	4e-06	57	1354	M
s_1_1_contig90720	gi|224381666|ref|NC_011462.1chromosome1	79.75	864	124	14	5303	6151	88972	88145	0	753	5	S
s_1_1_contig154079	gi|224381666|ref|NC_011462.1chromosome1	70.54	628	123	17	141	733	99130	98530	3e-72	279	2	S
s_1_1_contig175821	gi|224381666|ref|NC_011462.1chromosome1	69.91	1017	203	26	2385	3378	105581	104645	2e-117	430	1	S
s_1_1_contig218614	gi|224381666|ref|NC_011462.1chromosome1	75.35	503	79	11	337	822	108688	108214	3e-91	340	1	S
s_1_1_contig243971	gi|224381666|ref|NC_011462.1chromosome1	69.95	203	39	9	2	185	109680	109481	1e-10	72	3294	M
s_1_1_contig99373	gi|224381666|ref|NC_011462.1chromosome1	74.53	1437	257	30	392	1800	109739	111094	0	904	3	S
s_1_1_contig103694	gi|224381666|ref|NC_011462.1chromosome1	68.5	1400	293	32	108	1489	118499	119768	1e-146	526	1	S
s_1_1_contig153956	gi|224381666|ref|NC_011462.1chromosome1	76.09	849	104	15	491	1296	123062	122270	2e-180	637	2	S
s_1_1_contig142640	gi|224381666|ref|NC_011462.1chromosome1	70.96	334	71	10	966	1287	124297	124616	2e-31	143	42	M
s_1_1_contig244333	gi|224381666|ref|NC_011462.1chromosome1	74.12	340	64	10	2	333	130803	130480	2e-47	194	2	S
s_1_1_contig48447	gi|224381666|ref|NC_011462.1chromosome1	69.09	165	46	5	573	734	141142	141304	0.0007	50	15	M
s_1_1_contig193740	gi|224381666|ref|NC_011462.1chromosome1	77.23	101	22	1	24	123	145397	145497	3e-11	75	116	M
s_1_1_contig116702	gi|224381666|ref|NC_011462.1chromosome1	73.46	471	76	10	138	583	155748	156194	5e-74	286	1	S
s_1_1_contig99843	gi|224381666|ref|NC_011462.1chromosome1	75.17	1039	188	19	12258	13270	158452	159446	0	688	6	S
s_1_1_contig32917	gi|224381666|ref|NC_011462.1chromosome1	100	26	0	0	477	502	161561	161586	0.002	48	23	M
s_1_1_contig76920	gi|224381666|ref|NC_011462.1chromosome1	69.48	675	134	12	1401	2039	167025	166387	1e-78	300	1	S
s_1_1_contig56740	gi|224381666|ref|NC_011462.1chromosome1	70.96	1319	247	34	30203	31480	175443	174220	3e-174	621	14	S
s_1_1_contig7710	gi|224381666|ref|NC_011462.1chromosome1	87.8	123	14	1	1009	1131	216201	216080	7e-34	150	1	S
s_1_1_contig84348	gi|224381666|ref|NC_011462.1chromosome1	69.43	1184	245	28	2436	3570	220396	221511	7e-133	482	841	M
s_1_1_contig270600	gi|224381666|ref|NC_011462.1chromosome1	88.89	36	3	1	699	734	230236	230202	0.028	45	34	M
s_1_1_contig65003	gi|224381666|ref|NC_011462.1chromosome1	77.76	1295	203	18	935	2191	229300	230547	0	1032	2	S
s_1_1_contig70308	gi|224381666|ref|NC_011462.1chromosome1	72.38	956	129	22	21206	22151	240693	239863	8e-155	556	23	M
s_1_1_contig7037	gi|224381666|ref|NC_011462.1chromosome1	69.29	928	174	22	3093	3994	261697	262539	9e-106	390	1	S
s_1_1_contig38165	gi|224381666|ref|NC_011462.1chromosome1	70.72	181	32	10	610	777	263773	263601	1e-07	63	33	M
s_1_1_contig243616	gi|224381666|ref|NC_011462.1chromosome1	92.31	39	3	0	1350	1388	263848	263886	8e-06	57	2833	M
s_1_1_contig49958	gi|224381666|ref|NC_011462.1chromosome1	71.83	994	184	19	3826	4811	271634	270729	2e-147	531	5	S
s_1_1_contig74807	gi|224381666|ref|NC_011462.1chromosome1	71.93	741	123	16	2847	3566	276820	277496	3e-109	403	53	M
s_1_1_contig79894	gi|224381666|ref|NC_011462.1chromosome1	79.14	302	60	3	1178	1479	283089	283387	4e-63	250	1	S
s_1_1_contig82627	gi|224381666|ref|NC_011462.1chromosome1	80.16	731	107	9	8697	9398	305221	304500	0	659	6	S
s_1_1_contig167773	gi|224381666|ref|NC_011462.1chromosome1	88.57	70	5	2	2126	2192	317754	317685	2e-13	84	1163	M
s_1_1_contig243703	gi|224381666|ref|NC_011462.1chromosome1	79.73	74	12	2	730	801	317759	317687	4e-07	61	772	M
s_1_1_contig64262	gi|224381666|ref|NC_011462.1chromosome1	76.98	404	72	7	955	1352	320319	319931	4e-77	297	5	M
s_1_1_contig221142	gi|224381666|ref|NC_011462.1chromosome1	69.03	1198	258	24	2474	3648	324475	323368	2e-133	482	2	S
s_1_1_contig263101	gi|224381666|ref|NC_011462.1chromosome1	70.9	1244	218	29	907	2083	331694	330528	5e-172	610	2	S
s_1_1_contig180035	gi|224381666|ref|NC_011462.1chromosome1	69.38	454	115	8	1897	2349	336404	336834	1e-41	178	1	S
s_1_1_contig166652	gi|224381666|ref|NC_011462.1chromosome1	80	105	19	2	659	762	340391	340288	8e-15	88	66	M
s_1_1_contig79207	gi|224381666|ref|NC_011462.1chromosome1	76.16	1057	191	18	8774	9817	356806	355798	0	744	7	S
s_1_1_contig79397	gi|224381666|ref|NC_011462.1chromosome1	75.87	601	111	7	2477	3070	371667	372240	5e-117	430	3	S
s_1_1_contig181812	gi|224381666|ref|NC_011462.1chromosome1	71.43	231	50	2	91	321	386946	387160	3e-26	125	1	S
s_1_1_contig74696	gi|224381666|ref|NC_011462.1chromosome1	71.64	1132	219	21	2124	3217	396301	395234	5e-166	592	21	M
s_1_1_contig122331	gi|224381666|ref|NC_011462.1chromosome1	76.05	1094	174	20	2697	3782	399205	400218	0	782	2	S
s_1_1_contig134829	gi|224381666|ref|NC_011462.1chromosome1	75.87	663	113	15	345	989	401251	401884	2e-123	450	1	S
s_1_1_contig79923	gi|224381666|ref|NC_011462.1chromosome1	69.88	1205	215	26	7232	8397	409983	408888	3e-154	553	2	S
s_1_1_contig192017	gi|224381666|ref|NC_011462.1chromosome1	86.84	38	4	1	470	507	412524	412560	0.091	43	26	M
s_1_1_contig64608	gi|224381666|ref|NC_011462.1chromosome1	75.59	1282	223	32	9517	10786	418747	419950	0	838	5	S
s_1_1_contig184581	gi|224381666|ref|NC_011462.1chromosome1	74.63	134	31	3	2135	2266	423344	423212	5e-12	79	84	M
s_1_1_contig119492	gi|224381666|ref|NC_011462.1chromosome1	81.26	603	83	11	3225	3811	435000	434412	1e-155	556	2	S
s_1_1_contig95303	gi|224381666|ref|NC_011462.1chromosome1	70.41	1423	291	35	12591	13984	443018	441697	9e-177	628	3	S
s_1_1_contig83032	gi|224381666|ref|NC_011462.1chromosome1	76.98	1664	273	28	7340	8968	464649	466237	0	1247	10	S
s_1_1_contig3809	gi|224381666|ref|NC_011462.1chromosome1	75.76	817	131	16	1257	2054	483042	483810	2e-159	569	1	S
s_1_1_contig99063	gi|224381666|ref|NC_011462.1chromosome1	72.62	1735	305	39	6081	7783	492840	494436	0	966	7	S
s_1_1_contig129552	gi|224381666|ref|NC_011462.1chromosome1	79.41	204	39	2	1764	1967	503314	503114	3e-40	172	7	M
s_1_1_contig223217	gi|224381666|ref|NC_011462.1chromosome1	74.87	748	132	13	3044	3785	507313	508010	1e-136	493	4	S
s_1_1_contig127335	gi|224381666|ref|NC_011462.1chromosome1	74.25	1033	227	13	661	1688	510325	509327	0	641	1	S
s_1_1_contig195114	gi|224381666|ref|NC_011462.1chromosome1	72.21	493	124	8	1397	1878	512499	512009	4e-63	248	2	S
s_1_1_contig267721	gi|224381666|ref|NC_011462.1chromosome1	72.22	306	52	6	769	1073	513912	513639	1e-40	172	1	S
s_1_1_contig104429	gi|224381666|ref|NC_011462.1chromosome1	67.73	2234	403	59	620	2717	522578	520527	0	800	4	S
s_1_1_contig132479	gi|224381666|ref|NC_011462.1chromosome1	81.14	1824	280	19	365	2178	533078	531309	0	1710	66	M
s_1_1_contig260902	gi|224381666|ref|NC_011462.1chromosome1	85.12	645	65	7	2333	2977	534235	534848	0	728	1	S
s_1_1_contig230339	gi|224381666|ref|NC_011462.1chromosome1	83.1	71	10	1	2063	2131	536670	536600	6e-10	72	697	M
s_1_1_contig280856	gi|224381666|ref|NC_011462.1chromosome1	89.83	59	5	1	471	528	536668	536610	5e-12	77	6513	M
s_1_1_contig130150	gi|224381666|ref|NC_011462.1chromosome1	72.35	1262	235	31	2654	3850	537950	539162	0	666	3	S
s_1_1_contig198652	gi|224381666|ref|NC_011462.1chromosome1	70.21	1222	234	33	535	1740	544358	545465	2e-148	531	1	S
s_1_1_contig226047	gi|224381666|ref|NC_011462.1chromosome1	85.25	644	80	4	2616	3259	546132	545504	0	729	159	M
s_1_1_contig181039	gi|224381666|ref|NC_011462.1chromosome1	79.55	264	40	3	1	264	549260	549011	2e-58	232	1	S
s_1_1_contig157289	gi|224381666|ref|NC_011462.1chromosome1	76.35	778	136	9	3479	4238	553212	553959	1e-161	576	4	S
s_1_1_contig25535	gi|224381666|ref|NC_011462.1chromosome1	84.38	64	10	0	13	76	555533	555470	2e-10	72	118	M
s_1_1_contig261659	gi|224381666|ref|NC_011462.1chromosome1	76.45	985	127	17	1330	2272	555997	556918	0	749	5	S
s_1_1_contig223915	gi|224381666|ref|NC_011462.1chromosome1	81.06	1167	149	19	6229	7392	571434	572531	0	1088	8	S
s_1_1_contig121647	gi|224381666|ref|NC_011462.1chromosome1	71.52	1043	207	25	4611	5612	577126	576133	7e-142	511	2	S
s_1_1_contig184874	gi|224381666|ref|NC_011462.1chromosome1	72.48	218	44	8	1	204	581139	580924	9e-20	102	40	M
s_1_1_contig121580	gi|224381666|ref|NC_011462.1chromosome1	76.16	151	20	4	576	726	582128	581994	2e-20	107	95	M
s_1_1_contig63492	gi|224381666|ref|NC_011462.1chromosome1	78.05	1034	177	18	19396	20404	597356	598364	0	805	8	S
s_1_1_contig261075	gi|224381666|ref|NC_011462.1chromosome1	75.55	724	145	12	1728	2446	603180	603876	3e-133	482	1	S
s_1_1_contig163775	gi|224381666|ref|NC_011462.1chromosome1	73.86	723	146	16	896	1608	615744	615055	2e-114	419	5	S
s_1_1_contig72602	gi|224381666|ref|NC_011462.1chromosome1	74.53	483	86	12	124	593	622176	622634	2e-77	297	3	S
s_1_1_contig87002	gi|224381666|ref|NC_011462.1chromosome1	76.04	1231	236	16	4207	5422	626276	625090	0	872	4	S
s_1_1_contig81769	gi|224381666|ref|NC_011462.1chromosome1	72.93	735	137	19	2037	2756	633385	634072	3e-108	399	4	S
s_1_1_contig259929	gi|224381666|ref|NC_011462.1chromosome1	78.39	384	63	10	189	564	637841	638212	1e-76	291	1	S
s_1_1_contig130046	gi|224381666|ref|NC_011462.1chromosome1	77.86	411	68	8	102	502	638282	638679	7e-84	316	411	M
s_1_1_contig98756	gi|224381666|ref|NC_011462.1chromosome1	78.92	593	117	4	5504	6096	650748	650164	9e-137	495	3	S
s_1_1_contig179265	gi|224381666|ref|NC_011462.1chromosome1	70	820	158	22	2302	3072	657412	658192	7e-94	351	2	S
s_1_1_contig74954	gi|224381666|ref|NC_011462.1chromosome1	73.25	1417	262	24	5540	6903	683480	682128	0	845	14	S
s_1_1_contig12823	gi|224381666|ref|NC_011462.1chromosome1	76.21	1753	371	8	2230	3977	693003	691292	0	1287	3	S
s_1_1_contig243814	gi|224381666|ref|NC_011462.1chromosome1	65.31	369	60	13	12	376	694331	694635	1e-16	92	121	M
s_1_1_contig99606	gi|224381666|ref|NC_011462.1chromosome1	85.81	310	42	2	3228	3537	698682	698989	8e-95	354	8	S
s_1_1_contig259866	gi|224381666|ref|NC_011462.1chromosome1	96.15	26	1	0	638	663	707329	707304	0.088	43	44	M
s_1_1_contig140023	gi|224381666|ref|NC_011462.1chromosome1	66.12	2087	455	56	178	2170	706401	708329	2e-154	551	1	S
s_1_1_contig27043	gi|224381666|ref|NC_011462.1chromosome1	70.12	974	213	22	1	969	710139	709239	7e-114	416	1	S
s_1_1_contig166523	gi|224381666|ref|NC_011462.1chromosome1	69.37	728	138	23	1579	2267	711277	711958	1e-72	280	1	S
s_1_1_contig51286	gi|224381666|ref|NC_011462.1chromosome1	63.33	1590	349	49	113	1625	723028	721596	2e-57	230	2	S
s_1_1_contig65232	gi|224381666|ref|NC_011462.1chromosome1	73.93	1074	194	29	100	1161	729880	728881	7e-175	621	3	S
s_1_1_contig270764	gi|224381666|ref|NC_011462.1chromosome1	72.9	594	120	11	141	734	734689	734137	9e-89	333	1	S
s_1_1_contig17703	gi|224381666|ref|NC_011462.1chromosome1	75.07	1071	209	14	77	1122	734811	735848	0	717	1	S
s_1_1_contig265449	gi|224381666|ref|NC_011462.1chromosome1	77.87	592	101	12	264	845	735937	736508	8e-124	450	1	S
s_1_1_contig166304	gi|224381666|ref|NC_011462.1chromosome1	78.05	697	99	14	1877	2544	739341	740012	1e-154	553	2	S
s_1_1_contig217749	gi|224381666|ref|NC_011462.1chromosome1	85.8	162	23	0	824	985	743142	743303	3e-45	188	1	S
s_1_1_contig163786	gi|224381666|ref|NC_011462.1chromosome1	78.23	441	87	4	1087	1518	745143	744703	2e-94	352	79	M
s_1_1_contig180137	gi|224381666|ref|NC_011462.1chromosome1	74.59	429	67	13	469	886	745347	745744	2e-67	262	1	S
s_1_1_contig60134	gi|224381666|ref|NC_011462.1chromosome1	70.57	1444	278	35	3479	4865	750581	751934	0	663	5	S
s_1_1_contig120434	gi|224381666|ref|NC_011462.1chromosome1	76.49	251	49	6	1843	2091	755630	755872	3e-39	168	5	S
s_1_1_contig97790	gi|224381666|ref|NC_011462.1chromosome1	83.3	892	93	9	8661	9530	765501	766358	0	948	4	M
s_1_1_contig242605	gi|224381666|ref|NC_011462.1chromosome1	69.66	267	66	10	449	710	767380	767124	2e-14	86	59	M
s_1_1_contig94130	gi|224381666|ref|NC_011462.1chromosome1	80.86	1066	162	13	3885	4930	769706	770749	0	982	7	S
s_1_1_contig277353	gi|224381666|ref|NC_011462.1chromosome1	84.62	65	8	2	343	406	771166	771229	1e-08	66	558	M
s_1_1_contig128851	gi|224381666|ref|NC_011462.1chromosome1	72.55	929	203	16	1006	1925	781659	780774	4e-139	500	1	S
s_1_1_contig250938	gi|224381666|ref|NC_011462.1chromosome1	72.94	680	127	14	468	1140	783016	782387	1e-104	385	1	S
s_1_1_contig82683	gi|224381666|ref|NC_011462.1chromosome1	75.08	967	167	13	3118	4069	786212	787119	0	666	2	S
s_1_1_contig110118	gi|224381666|ref|NC_011462.1chromosome1	81.14	1066	165	17	4077	5120	789150	790201	0	973	476	M
s_1_1_contig168623	gi|224381666|ref|NC_011462.1chromosome1	76.37	457	59	7	932	1372	794519	794942	5e-94	351	1	S
s_1_1_contig86211	gi|224381666|ref|NC_011462.1chromosome1	73.51	3632	696	57	358	3936	795162	798580	0	2195	4	S
s_1_1_contig94670	gi|224381666|ref|NC_011462.1chromosome1	75.63	2618	454	43	4677	7250	811210	808733	0	1817	6	S
s_1_1_contig90715	gi|224381666|ref|NC_011462.1chromosome1	71.15	1622	344	39	2446	4030	823979	822445	0	751	18	M
s_1_1_contig50170	gi|224381666|ref|NC_011462.1chromosome1	73.25	1641	296	30	1595	3195	826999	828536	0	975	2	S
s_1_1_contig103404	gi|224381666|ref|NC_011462.1chromosome1	71.12	831	175	15	528	1346	829183	829960	2e-111	408	1	S
s_1_1_contig121456	gi|224381666|ref|NC_011462.1chromosome1	73.92	1706	313	31	24	1704	837317	835719	0	1050	2	S
s_1_1_contig16497	gi|224381666|ref|NC_011462.1chromosome1	77.31	119	19	4	1421	1532	837834	837951	2e-13	82	79	M
s_1_1_contig270943	gi|224381666|ref|NC_011462.1chromosome1	75.86	580	110	7	1	579	838191	838741	4e-112	410	1	S
s_1_1_contig76870	gi|224381666|ref|NC_011462.1chromosome1	77.69	1255	201	20	868	2111	841726	840540	0	982	2	S
s_1_1_contig249879	gi|224381666|ref|NC_011462.1chromosome1	73.58	159	36	1	432	584	842418	842260	1e-18	99	52	M
s_1_1_contig2420	gi|224381666|ref|NC_011462.1chromosome1	70.84	559	107	14	9	551	842927	843445	1e-67	260	1	S
s_1_1_contig9595	gi|224381666|ref|NC_011462.1chromosome1	79.86	283	47	7	1321	1599	843931	843655	2e-58	232	1	S
s_1_1_contig121003	gi|224381666|ref|NC_011462.1chromosome1	76.04	2141	345	36	1269	3321	850497	848437	0	1537	2	S
s_1_1_contig68882	gi|224381666|ref|NC_011462.1chromosome1	72.07	1278	276	28	5204	6448	852320	851091	0	643	2	S
s_1_1_contig88800	gi|224381666|ref|NC_011462.1chromosome1	71.51	1748	295	46	10980	12650	867717	869338	0	883	11	S
s_1_1_contig96334	gi|224381666|ref|NC_011462.1chromosome1	72.57	1411	192	37	3365	4729	883992	885253	0	809	2	S
s_1_1_contig181263	gi|224381666|ref|NC_011462.1chromosome1	80.63	981	124	18	2224	3192	895888	894962	0	892	5	S
s_1_1_contig163377	gi|224381666|ref|NC_011462.1chromosome1	74.5	1106	196	17	1741	2806	901576	902635	0	724	2	S
s_1_1_contig165850	gi|224381666|ref|NC_011462.1chromosome1	79.71	631	85	8	2	608	905758	905147	5e-158	563	91	M
s_1_1_contig10712	gi|224381666|ref|NC_011462.1chromosome1	77.4	1270	213	18	354	1588	906976	905746	0	982	1	S
s_1_1_contig236526	gi|224381666|ref|NC_011462.1chromosome1	66.39	607	121	19	1	590	907987	907447	9e-39	165	76	M
s_1_1_contig175818	gi|224381666|ref|NC_011462.1chromosome1	66.27	335	77	13	341	650	909217	909540	1e-09	70	929	M
s_1_1_contig175370	gi|224381666|ref|NC_011462.1chromosome1	79.72	281	39	3	1912	2191	909938	910201	9e-65	253	1	S
s_1_1_contig201686	gi|224381666|ref|NC_011462.1chromosome1	79.03	515	57	10	27	519	910728	910243	2e-122	443	1	S
s_1_1_contig63543	gi|224381666|ref|NC_011462.1chromosome1	76.9	909	151	13	2158	3029	912357	913243	0	688	2	S
s_1_1_contig9872	gi|224381666|ref|NC_011462.1chromosome1	70.68	873	153	27	257	1095	914778	913975	1e-106	392	1	S
s_1_1_contig19351	gi|224381666|ref|NC_011462.1chromosome1	80.92	283	30	4	864	1139	915470	915735	2e-70	271	1	S
s_1_1_contig13210	gi|224381666|ref|NC_011462.1chromosome1	70.46	887	186	20	648	1516	916243	917071	4e-108	398	1	S
s_1_1_contig173718	gi|224381666|ref|NC_011462.1chromosome1	70.14	710	124	18	660	1324	924815	925481	4e-86	324	2	S
s_1_1_contig89243	gi|224381666|ref|NC_011462.1chromosome1	69.92	1709	330	36	688	2323	930001	928404	0	769	2	S
s_1_1_contig55566	gi|224381666|ref|NC_011462.1chromosome1	69.17	2449	487	66	1262	3642	946030	943782	0	957	1	S
s_1_1_contig185760	gi|224381666|ref|NC_011462.1chromosome1	83.12	77	11	2	133	209	947908	947834	1e-10	73	7046	M
s_1_1_contig272377	gi|224381666|ref|NC_011462.1chromosome1	79.68	502	80	6	3	492	948609	949100	3e-121	439	1	S
s_1_1_contig92564	gi|224381666|ref|NC_011462.1chromosome1	75.48	1982	328	35	164	2109	949849	951708	0	1368	12	S
s_1_1_contig43768	gi|224381666|ref|NC_011462.1chromosome1	91.43	35	3	0	136	170	972596	972562	0.0005	50	96	M
s_1_1_contig239486	gi|224381666|ref|NC_011462.1chromosome1	69.07	1985	366	56	17	1941	971235	973031	0	783	2	S
s_1_1_contig96384	gi|224381666|ref|NC_011462.1chromosome1	72.71	1810	344	39	207	1975	977580	979280	0	996	3	S
s_1_1_contig118326	gi|224381666|ref|NC_011462.1chromosome1	81.81	1484	230	16	1493	2968	982811	984262	0	1424	2	S
s_1_1_contig31620	gi|224381666|ref|NC_011462.1chromosome1	76.31	249	31	5	16	238	986373	986127	7e-45	187	1	S
s_1_1_contig196418	gi|224381666|ref|NC_011462.1chromosome1	80.8	401	53	4	1854	2252	987455	987077	1e-102	379	1	S
s_1_1_contig266236	gi|224381666|ref|NC_011462.1chromosome1	71.47	715	145	11	110	821	988894	989552	2e-101	374	1	S
s_1_1_contig149163	gi|224381666|ref|NC_011462.1chromosome1	76.55	857	146	12	1	850	990364	989556	5e-180	636	3	M
s_1_1_contig38963	gi|224381666|ref|NC_011462.1chromosome1	86.11	36	2	1	332	367	991059	991027	0.34	41	28	M
s_1_1_contig279319	gi|224381666|ref|NC_011462.1chromosome1	68.75	560	121	11	33	566	993485	992954	2e-55	221	1	S
s_1_1_contig229036	gi|224381666|ref|NC_011462.1chromosome1	85.42	48	6	1	334	380	995421	995468	0.0006	52	65	M
s_1_1_contig141827	gi|224381666|ref|NC_011462.1chromosome1	76.11	653	116	11	4226	4875	998680	999295	9e-127	461	4	S
s_1_1_contig52191	gi|224381666|ref|NC_011462.1chromosome1	72.9	1129	197	32	1607	2715	1010559	1009520	2e-171	610	5	S
s_1_1_contig178438	gi|224381666|ref|NC_011462.1chromosome1	72.81	2313	418	54	11	2285	1012006	1014145	0	1283	1	S
s_1_1_contig269817	gi|224381666|ref|NC_011462.1chromosome1	74.86	863	159	14	14	859	1015759	1014938	2e-159	567	1	S
s_1_1_contig47081	gi|224381666|ref|NC_011462.1chromosome1	93.1	29	2	0	759	787	1015597	1015569	0.056	45	68	M
s_1_1_contig133025	gi|224381666|ref|NC_011462.1chromosome1	69.94	1733	308	44	1354	3024	1022479	1020898	0	771	5	S
s_1_1_contig181323	gi|224381666|ref|NC_011462.1chromosome1	68.59	866	157	24	1475	2296	1024415	1025209	4e-88	331	3	S
s_1_1_contig113757	gi|224381666|ref|NC_011462.1chromosome1	77.86	1572	195	30	1093	2635	1026787	1028234	0	1269	3	S
s_1_1_contig62421	gi|224381666|ref|NC_011462.1chromosome1	76.69	1819	274	39	94	1846	1031894	1033628	0	1328	1	S
s_1_1_contig235458	gi|224381666|ref|NC_011462.1chromosome1	69.34	137	42	0	29	165	1046057	1045921	2e-06	59	30	M
s_1_1_contig201529	gi|224381666|ref|NC_011462.1chromosome1	69.14	243	58	4	2054	2293	1047841	1048069	6e-18	99	540	M
s_1_1_contig257222	gi|224381666|ref|NC_011462.1chromosome1	100	30	0	0	406	435	1057524	1057553	1e-05	55	35	M
s_1_1_contig206697	gi|224381666|ref|NC_011462.1chromosome1	93.55	31	2	0	1503	1533	1057524	1057554	0.006	48	103	M
s_1_1_contig48589	gi|224381666|ref|NC_011462.1chromosome1	86.05	43	5	1	80	122	1068062	1068103	0.002	48	66	M
s_1_1_contig72540	gi|224381666|ref|NC_011462.1chromosome1	69.2	841	182	21	4127	4927	1067887	1068690	3e-85	324	1	S
s_1_1_contig237363	gi|224381666|ref|NC_011462.1chromosome1	65.7	519	125	14	158	662	1075175	1074696	3e-24	118	90	M
s_1_1_contig94123	gi|224381666|ref|NC_011462.1chromosome1	73.49	611	92	14	4265	4873	1080458	1081000	5e-100	372	1	S
s_1_1_contig138458	gi|224381666|ref|NC_011462.1chromosome1	76.71	511	92	7	2092	2593	1086263	1085771	6e-102	378	3	M
s_1_1_contig274612	gi|224381666|ref|NC_011462.1chromosome1	82.47	97	12	2	481	574	1087564	1087470	3e-17	95	116	M
s_1_1_contig22788	gi|224381666|ref|NC_011462.1chromosome1	76.9	420	61	13	378	775	1088270	1088675	2e-77	295	1	S
s_1_1_contig95217	gi|224381666|ref|NC_011462.1chromosome1	66.79	831	158	26	1862	2670	1091648	1090914	1e-61	244	2	S
s_1_1_contig81665	gi|224381666|ref|NC_011462.1chromosome1	74.47	423	77	8	1209	1629	1095017	1094624	1e-68	268	1	S
s_1_1_contig96273	gi|224381666|ref|NC_011462.1chromosome1	70.73	492	80	13	88	574	1101246	1100814	2e-59	237	12	M
s_1_1_contig120784	gi|224381666|ref|NC_011462.1chromosome1	77.15	766	120	23	6446	7204	1105675	1104958	9e-150	538	4	S
s_1_1_contig94938	gi|224381666|ref|NC_011462.1chromosome1	74.35	269	52	9	2544	2805	1112140	1112398	5e-33	149	1	S
s_1_1_contig180835	gi|224381666|ref|NC_011462.1chromosome1	67	400	98	8	1322	1693	1116350	1115957	6e-25	122	59	M
s_1_1_contig12815	gi|224381666|ref|NC_011462.1chromosome1	69.62	474	103	13	796	1265	1117897	1118333	3e-44	185	1	S
s_1_1_contig175004	gi|224381666|ref|NC_011462.1chromosome1	71.27	717	137	19	257	935	1120173	1120858	1e-91	342	1	S
s_1_1_contig98869	gi|224381666|ref|NC_011462.1chromosome1	73.94	752	139	25	1874	2611	1125839	1125131	3e-112	412	39	M
s_1_1_contig3455	gi|224381666|ref|NC_011462.1chromosome1	67.63	658	109	19	193	782	1126253	1126874	4e-59	235	1	S
s_1_1_contig116022	gi|224381666|ref|NC_011462.1chromosome1	76.98	921	163	15	4013	4930	1131401	1130527	0	682	8	M
s_1_1_contig1618	gi|224381666|ref|NC_011462.1chromosome1	72.93	314	55	9	125	434	1136673	1136386	2e-40	170	1	S
s_1_1_contig23691	gi|224381666|ref|NC_011462.1chromosome1	75.02	1493	255	25	550	2026	1138379	1136989	0	1005	1	S
s_1_1_contig132166	gi|224381666|ref|NC_011462.1chromosome1	69.79	1791	332	58	2348	4074	1141201	1139556	0	719	2	S
s_1_1_contig204984	gi|224381666|ref|NC_011462.1chromosome1	68.68	795	173	15	31	772	1144162	1144933	6e-83	313	1	S
s_1_1_contig180851	gi|224381666|ref|NC_011462.1chromosome1	68.62	819	173	21	1461	2269	1147793	1148537	8e-79	300	2	S
s_1_1_contig144117	gi|224381666|ref|NC_011462.1chromosome1	74.81	393	79	8	1175	1563	1149192	1149568	3e-62	244	1	S
s_1_1_contig45676	gi|224381666|ref|NC_011462.1chromosome1	75.93	511	112	7	176	682	1150127	1149624	6e-93	345	1	S
s_1_1_contig36324	gi|224381666|ref|NC_011462.1chromosome1	69.83	242	41	15	474	710	1150179	1150393	7e-10	70	108	M
s_1_1_contig61309	gi|224381666|ref|NC_011462.1chromosome1	71.59	542	108	16	7184	7709	1153836	1154347	3e-64	253	66	M
s_1_1_contig4802	gi|224381666|ref|NC_011462.1chromosome1	69.4	1075	208	26	2178	3239	1157385	1156419	5e-123	448	2	S
s_1_1_contig118444	gi|224381666|ref|NC_011462.1chromosome1	72.17	1883	345	42	1079	2906	1160471	1162229	0	1005	2	S
s_1_1_contig112603	gi|224381666|ref|NC_011462.1chromosome1	78.8	1014	149	19	3378	4365	1168275	1169248	0	834	2	S
s_1_1_contig120307	gi|224381666|ref|NC_011462.1chromosome1	69.87	2549	466	69	978	3418	1172404	1174758	0	1095	3	S
s_1_1_contig89329	gi|224381666|ref|NC_011462.1chromosome1	68.12	1123	210	28	5981	7053	1180352	1179328	4e-114	419	3	S
s_1_1_contig144512	gi|224381666|ref|NC_011462.1chromosome1	79.19	173	29	3	1669	1841	1186031	1186196	1e-31	143	1	S
s_1_1_contig278658	gi|224381666|ref|NC_011462.1chromosome1	89.47	228	23	1	263	489	1186808	1187035	2e-79	300	1	S
s_1_1_contig123196	gi|224381666|ref|NC_011462.1chromosome1	66.99	830	155	26	1612	2391	1189399	1190159	1e-63	251	2	S
s_1_1_contig164946	gi|224381666|ref|NC_011462.1chromosome1	73.44	689	121	9	433	1115	1194390	1195022	3e-119	434	2	S
s_1_1_contig36457	gi|224381666|ref|NC_011462.1chromosome1	100	25	0	0	513	537	1196194	1196218	0.007	46	19	M
s_1_1_contig123582	gi|224381666|ref|NC_011462.1chromosome1	69.31	580	123	13	977	1531	1198473	1197924	2e-59	235	1	S
s_1_1_contig274273	gi|224381666|ref|NC_011462.1chromosome1	77.68	457	82	9	149	600	1200075	1199634	2e-91	342	1	S
s_1_1_contig107946	gi|224381666|ref|NC_011462.1chromosome1	80.14	428	69	4	4986	5409	1201019	1200604	5e-104	385	3	S
s_1_1_contig130098	gi|224381666|ref|NC_011462.1chromosome1	74.81	1457	208	33	1697	3134	1205095	1206411	0	967	1	S
s_1_1_contig38308	gi|224381666|ref|NC_011462.1chromosome1	93.15	803	43	2	95	895	1208124	1208916	0	1202	1	S
s_1_1_contig107400	gi|224381666|ref|NC_011462.1chromosome1	93.16	1651	51	17	1	1592	1209021	1210668	0	2448	2	S
s_1_1_contig220593	gi|224381666|ref|NC_011462.1chromosome1	73.39	372	57	13	77	440	1213626	1213963	2e-50	205	1	S
s_1_1_contig199113	gi|224381666|ref|NC_011462.1chromosome1	64.83	1291	219	53	3455	4703	1215584	1214487	6e-65	255	117	M
s_1_1_contig99871	gi|224381666|ref|NC_011462.1chromosome1	66.58	1487	293	41	8677	10143	1219949	1221251	2e-120	441	2	S
s_1_1_contig126688	gi|224381666|ref|NC_011462.1chromosome1	77	1896	269	35	694	2527	1233708	1231918	0	1447	3	S
s_1_1_contig132948	gi|224381666|ref|NC_011462.1chromosome1	66.59	886	194	25	563	1431	1235032	1235832	3e-61	242	16	M
s_1_1_contig90862	gi|224381666|ref|NC_011462.1chromosome1	71.83	2343	444	61	7008	9269	1245646	1247853	0	1169	9	M
s_1_1_contig68935	gi|224381666|ref|NC_011462.1chromosome1	73.6	1807	310	40	5788	7545	1256774	1255086	0	1079	7	S
s_1_1_contig263908	gi|224381666|ref|NC_011462.1chromosome1	73.96	457	104	6	2316	2768	1264075	1264520	4e-71	275	1	S
s_1_1_contig112587	gi|224381666|ref|NC_011462.1chromosome1	69.81	2070	420	47	587	2598	1266643	1268565	0	888	2	S
s_1_1_contig109557	gi|224381666|ref|NC_011462.1chromosome1	80.28	3114	366	40	3943	6949	1273928	1270956	0	2892	4	M
s_1_1_contig273959	gi|224381666|ref|NC_011462.1chromosome1	66.25	880	181	20	1	871	1277397	1278169	7e-68	262	1	S
s_1_1_contig10573	gi|224381666|ref|NC_011462.1chromosome1	78.57	574	96	11	1465	2016	1279116	1278548	1e-125	455	1	S
s_1_1_contig234726	gi|224381666|ref|NC_011462.1chromosome1	65.79	833	166	16	220	1018	1279608	1280355	4e-65	253	1	S
s_1_1_contig201224	gi|224381666|ref|NC_011462.1chromosome1	71.23	862	163	15	43	871	1280377	1281186	3e-123	446	1	S
s_1_1_contig138052	gi|224381666|ref|NC_011462.1chromosome1	70.23	2533	471	49	231	2702	1281259	1283569	0	1204	1	S
s_1_1_contig146543	gi|224381666|ref|NC_011462.1chromosome1	71.36	1166	214	27	8	1111	1283564	1284671	8e-164	583	3	S
s_1_1_contig163610	gi|224381666|ref|NC_011462.1chromosome1	70.17	1046	201	22	6	1003	1289314	1290296	5e-133	480	1	S
s_1_1_contig103472	gi|224381666|ref|NC_011462.1chromosome1	76.33	1280	245	23	4830	6101	1297563	1298792	0	892	2	S
s_1_1_contig87823	gi|224381666|ref|NC_011462.1chromosome1	70.53	2263	341	54	4089	6254	1303682	1301649	0	1124	289	M
s_1_1_contig256850	gi|224381666|ref|NC_011462.1chromosome1	80	225	39	3	116	339	1307353	1307134	5e-48	196	7	M
s_1_1_contig79373	gi|224381666|ref|NC_011462.1chromosome1	68.26	2287	419	53	8114	10324	1317882	1319937	0	890	12	S
s_1_1_contig274110	gi|224381666|ref|NC_011462.1chromosome1	92.31	39	3	0	108	146	1321416	1321454	5e-06	57	55	M
s_1_1_contig177316	gi|224381666|ref|NC_011462.1chromosome1	69.19	1535	261	33	209	1669	1333283	1334679	0	679	1	S
s_1_1_contig132855	gi|224381666|ref|NC_011462.1chromosome1	77.05	1198	196	22	144	1310	1335133	1336282	0	893	2	S
s_1_1_contig238687	gi|224381666|ref|NC_011462.1chromosome1	86.67	45	5	1	1131	1175	1336821	1336778	0.0003	52	335	M
s_1_1_contig50418	gi|224381666|ref|NC_011462.1chromosome1	75.68	1591	243	39	306	1837	1338457	1339962	0	1079	5	S
s_1_1_contig124781	gi|224381666|ref|NC_011462.1chromosome1	71.17	1967	349	35	1003	2838	1350245	1352124	0	1031	3	S
s_1_1_contig24170	gi|224381666|ref|NC_011462.1chromosome1	68.88	347	82	7	362	707	1354237	1354558	2e-28	131	125	M
s_1_1_contig168614	gi|224381666|ref|NC_011462.1chromosome1	71.83	703	122	17	299	992	1355716	1356351	3e-99	367	1	S
s_1_1_contig274466	gi|224381666|ref|NC_011462.1chromosome1	72.35	622	113	14	1	608	1365054	1365630	3e-90	336	2	S
s_1_1_contig280744	gi|224381666|ref|NC_011462.1chromosome1	88.06	67	6	2	503	568	1366023	1365958	1e-12	79	4479	M
s_1_1_contig167783	gi|224381666|ref|NC_011462.1chromosome1	73.06	1470	274	33	1256	2665	1367470	1366063	0	827	2	S
s_1_1_contig101620	gi|224381666|ref|NC_011462.1chromosome1	73.76	1250	237	27	3151	4372	1373592	1372406	0	737	5	S
s_1_1_contig36095	gi|224381666|ref|NC_011462.1chromosome1	88.57	35	3	1	6	39	1387473	1387507	0.095	43	17	M
s_1_1_contig181647	gi|224381666|ref|NC_011462.1chromosome1	68.58	296	74	11	1327	1607	1389322	1389031	3e-13	82	53	M
s_1_1_contig100535	gi|224381666|ref|NC_011462.1chromosome1	74.7	1253	216	24	53	1232	1395391	1394167	0	814	12	S
s_1_1_contig194050	gi|224381666|ref|NC_011462.1chromosome1	68.14	499	93	10	1140	1591	1396094	1395615	4e-48	197	2	S
s_1_1_contig211734	gi|224381666|ref|NC_011462.1chromosome1	74.66	438	88	8	2	429	1396877	1397301	7e-72	275	1	S
s_1_1_contig115162	gi|224381666|ref|NC_011462.1chromosome1	68.73	2667	523	60	6707	9305	1399780	1397357	0	1059	12	S
s_1_1_contig125754	gi|224381666|ref|NC_011462.1chromosome1	76.73	1405	255	17	2355	3713	1423700	1422322	0	1049	3	S
s_1_1_contig52968	gi|224381666|ref|NC_011462.1chromosome1	72.67	472	83	10	5	475	1429846	1429420	1e-68	266	1	S
s_1_1_contig69874	gi|224381666|ref|NC_011462.1chromosome1	74.87	1122	202	20	2877	3971	1431908	1430840	0	735	925	M
s_1_1_contig231473	gi|224381666|ref|NC_011462.1chromosome1	70.75	106	27	2	438	543	1436572	1436673	0.009	46	68	M
s_1_1_contig57797	gi|224381666|ref|NC_011462.1chromosome1	72.05	1982	332	52	341	2212	1441922	1440053	0	1043	2	S
s_1_1_contig196233	gi|224381666|ref|NC_011462.1chromosome1	74.96	1270	229	20	576	1831	1444750	1443556	0	847	1	S
s_1_1_contig58974	gi|224381666|ref|NC_011462.1chromosome1	74.8	1885	325	40	1013	2829	1445530	1447332	0	1213	3	S
s_1_1_contig24606	gi|224381666|ref|NC_011462.1chromosome1	73.99	223	40	6	592	805	1453561	1453348	4e-28	131	1	S
s_1_1_contig268297	gi|224381666|ref|NC_011462.1chromosome1	77.85	1016	183	14	1215	2216	1455221	1456208	0	792	2	S
s_1_1_contig253522	gi|224381666|ref|NC_011462.1chromosome1	85.71	42	6	0	648	689	1457618	1457577	0.0006	50	3517	M
s_1_1_contig96232	gi|224381666|ref|NC_011462.1chromosome1	70.72	2852	601	67	2963	5728	1460514	1463217	0	1288	6	S
s_1_1_contig36143	gi|224381666|ref|NC_011462.1chromosome1	83.64	55	9	0	858	912	1471566	1471620	2e-06	59	74	M
s_1_1_contig207841	gi|224381666|ref|NC_011462.1chromosome1	79.66	59	9	2	318	376	1471609	1471664	0.009	46	52	M
s_1_1_contig281252	gi|224381666|ref|NC_011462.1chromosome1	70.02	587	148	13	109	680	1471214	1471787	1e-58	232	2	S
s_1_1_contig87148	gi|224381666|ref|NC_011462.1chromosome1	75.83	2172	377	37	6199	8310	1474514	1472431	0	1517	376	M
s_1_1_contig109982	gi|224381666|ref|NC_011462.1chromosome1	71.46	1279	267	29	4093	5349	1479555	1480757	2e-174	619	1	S
s_1_1_contig138985	gi|224381666|ref|NC_011462.1chromosome1	76.38	2650	442	49	38	2613	1483956	1481417	0	1902	2	S
s_1_1_contig149741	gi|224381666|ref|NC_011462.1chromosome1	71.15	1404	262	39	970	2327	1487458	1486152	0	659	5	S
s_1_1_contig141639	gi|224381666|ref|NC_011462.1chromosome1	71.48	2016	354	49	1656	3616	1493367	1491518	0	1021	3	S
s_1_1_contig91160	gi|224381666|ref|NC_011462.1chromosome1	72.44	1513	281	30	559	1991	1495799	1497255	0	836	398	M
s_1_1_contig266116	gi|224381666|ref|NC_011462.1chromosome1	75.9	390	65	7	1743	2112	1509774	1510154	3e-71	275	1	S
s_1_1_contig51157	gi|224381666|ref|NC_011462.1chromosome1	84.62	923	112	11	8429	9332	1524195	1525106	0	1002	8	S
s_1_1_contig46221	gi|224381666|ref|NC_011462.1chromosome1	93.1	29	2	0	647	675	1528580	1528552	0.031	45	43	M
s_1_1_contig89771	gi|224381666|ref|NC_011462.1chromosome1	75.53	2329	358	43	2497	4739	1529597	1531799	0	1627	4	S
s_1_1_contig105017	gi|224381666|ref|NC_011462.1chromosome1	76.37	1680	262	29	1	1641	1532174	1533757	0	1231	5	S
s_1_1_contig103097	gi|224381666|ref|NC_011462.1chromosome1	84.44	45	3	2	1395	1437	1546752	1546794	0.07	45	41	M
s_1_1_contig105683	gi|224381666|ref|NC_011462.1chromosome1	73.6	4015	643	89	10474	14341	1554116	1550372	0	2437	10	S
s_1_1_contig67565	gi|224381666|ref|NC_011462.1chromosome1	70.62	817	142	23	6771	7523	1560519	1559737	4e-101	376	2	S
s_1_1_contig61335	gi|224381666|ref|NC_011462.1chromosome1	84	50	7	1	487	535	1562308	1562259	0.002	52	69	M
s_1_1_contig169523	gi|224381666|ref|NC_011462.1chromosome1	100	26	0	0	2	27	1575652	1575627	0.008	48	100	M
s_1_1_contig103126	gi|224381666|ref|NC_011462.1chromosome1	75.03	2243	340	45	4654	6816	1574149	1576251	0	1516	4	S
s_1_1_contig63039	gi|224381666|ref|NC_011462.1chromosome1	81.8	4214	560	51	33729	37818	1581789	1577659	0	4098	103	M
s_1_1_contig184669	gi|224381666|ref|NC_011462.1chromosome1	69.5	905	269	2	387	1286	1579420	1580322	2e-104	385	2	M
s_1_1_contig212380	gi|224381666|ref|NC_011462.1chromosome1	93.33	30	2	0	568	597	1611240	1611211	0.009	46	37	M
s_1_1_contig68964	gi|224381666|ref|NC_011462.1chromosome1	83.95	3968	504	40	9270	13164	1627697	1623790	0	4224	12	M
s_1_1_contig275355	gi|224381666|ref|NC_011462.1chromosome1	78.57	182	37	2	831	1011	1625612	1625432	2e-32	145	2	M
s_1_1_contig147890	gi|224381666|ref|NC_011462.1chromosome1	89.66	58	5	1	1603	1659	1640185	1640242	4e-11	75	892	M
s_1_1_contig248774	gi|224381666|ref|NC_011462.1chromosome1	76.54	456	76	7	255	693	1664856	1664415	3e-90	336	1	S
s_1_1_contig115007	gi|224381666|ref|NC_011462.1chromosome1	77.11	1634	223	35	1427	3003	1666438	1664899	0	1240	1	S
s_1_1_contig74156	gi|224381666|ref|NC_011462.1chromosome1	74.2	2802	444	50	1	2743	1668365	1670946	0	1820	3	S
s_1_1_contig13850	gi|224381666|ref|NC_011462.1chromosome1	81.48	459	63	6	1	453	1675108	1675550	3e-120	437	1	S
s_1_1_contig62963	gi|224381666|ref|NC_011462.1chromosome1	77.29	1845	296	28	484	2282	1679309	1677542	0	1424	1	S
s_1_1_contig159537	gi|224381666|ref|NC_011462.1chromosome1	75.28	1169	212	24	2313	3448	1681146	1680022	0	767	2	S
s_1_1_contig108981	gi|224381666|ref|NC_011462.1chromosome1	74.69	1592	231	28	130	1703	1693067	1691630	0	1083	6	S
s_1_1_contig79448	gi|224381666|ref|NC_011462.1chromosome1	76.54	2600	437	60	2243	4758	1695683	1698193	0	1824	12	S
s_1_1_contig140034	gi|224381666|ref|NC_011462.1chromosome1	69.93	572	93	18	20	539	1703135	1703679	1e-62	246	1	S
s_1_1_contig129171	gi|224381666|ref|NC_011462.1chromosome1	75.35	4236	664	86	994	5121	1705681	1709644	0	2888	10	S
s_1_1_contig110586	gi|224381666|ref|NC_011462.1chromosome1	79.11	1374	216	16	2879	4241	1718675	1717362	0	1177	6	S
s_1_1_contig162200	gi|224381666|ref|NC_011462.1chromosome1	69.94	1284	214	29	2089	3305	1722417	1723595	9e-169	600	22	M
s_1_1_contig99733	gi|224381666|ref|NC_011462.1chromosome1	76.09	1828	308	40	5869	7667	1728706	1730433	0	1263	5	S
s_1_1_contig183879	gi|224381666|ref|NC_011462.1chromosome1	71.41	934	151	25	23	920	1732018	1732871	2e-131	473	1	S
s_1_1_contig265078	gi|224381666|ref|NC_011462.1chromosome1	75	180	37	5	13	189	1733127	1732953	4e-21	107	3716	M
s_1_1_contig87940	gi|224381666|ref|NC_011462.1chromosome1	78.7	4958	704	62	7340	12172	1743063	1747793	0	4219	18	M
s_1_1_contig56365	gi|224381666|ref|NC_011462.1chromosome1	75.26	1892	293	39	3570	5422	1768495	1770250	0	1285	3	S
s_1_1_contig128292	gi|224381666|ref|NC_011462.1chromosome1	73.11	1365	213	25	2697	3979	1774161	1772869	0	834	3	S
s_1_1_contig219462	gi|224381666|ref|NC_011462.1chromosome1	78.05	1148	148	25	890	1983	1777110	1778207	0	915	2	S
s_1_1_contig144482	gi|224381666|ref|NC_011462.1chromosome1	70.65	821	169	17	556	1365	1778358	1779117	6e-104	383	1	S
s_1_1_contig228157	gi|224381666|ref|NC_011462.1chromosome1	81.08	74	12	1	5	76	1780938	1780865	6e-09	68	78	M
s_1_1_contig107230	gi|224381666|ref|NC_011462.1chromosome1	71.44	2584	461	68	6	2494	1786275	1783874	0	1276	3	S
s_1_1_contig39458	gi|224381666|ref|NC_011462.1chromosome1	84.21	38	6	0	291	328	1795773	1795810	0.069	43	14	M
s_1_1_contig100781	gi|224381666|ref|NC_011462.1chromosome1	75.88	3735	648	65	672	4319	1805928	1802360	0	2608	7	S
s_1_1_contig259819	gi|224381666|ref|NC_011462.1chromosome1	90.91	33	3	0	275	307	1803909	1803941	0.017	46	105	M
s_1_1_contig18983	gi|224381666|ref|NC_011462.1chromosome1	93.33	30	2	0	532	561	1807222	1807251	0.006	46	17	M
s_1_1_contig112742	gi|224381666|ref|NC_011462.1chromosome1	80.13	1369	169	27	1	1333	1807349	1808650	0	1214	2	S
s_1_1_contig132777	gi|224381666|ref|NC_011462.1chromosome1	69.86	292	62	10	947	1215	1815535	1815247	3e-21	109	10649	M
s_1_1_contig195413	gi|224381666|ref|NC_011462.1chromosome1	78.86	317	53	8	1468	1778	1815580	1815272	1e-62	246	13	M
s_1_1_contig243947	gi|224381666|ref|NC_011462.1chromosome1	83.19	119	18	2	865	983	1815520	1815404	2e-24	118	2376	M
s_1_1_contig74240	gi|224381666|ref|NC_011462.1chromosome1	79.55	132	25	2	15302	15432	1815538	1815408	2e-20	109	2375	M
s_1_1_contig243380	gi|224381666|ref|NC_011462.1chromosome1	76.62	154	25	2	418	560	1815561	1815408	4e-24	116	3463	M
s_1_1_contig254817	gi|224381666|ref|NC_011462.1chromosome1	84.46	148	20	3	353	499	1815563	1815418	5e-35	152	61	M
s_1_1_contig242467	gi|224381666|ref|NC_011462.1chromosome1	88.52	61	6	1	636	695	1815548	1815488	2e-11	75	950	M
s_1_1_contig251881	gi|224381666|ref|NC_011462.1chromosome1	92.73	55	4	0	370	424	1815542	1815488	6e-14	82	1487	M
s_1_1_contig267613	gi|224381666|ref|NC_011462.1chromosome1	87.04	54	6	1	1534	1586	1815541	1815488	2e-07	63	229	M
s_1_1_contig275476	gi|224381666|ref|NC_011462.1chromosome1	86.67	60	7	1	502	560	1815547	1815488	5e-10	70	100	M
s_1_1_contig280615	gi|224381666|ref|NC_011462.1chromosome1	88.57	70	7	1	467	535	1815557	1815488	2e-15	88	657	M
s_1_1_contig185076	gi|224381666|ref|NC_011462.1chromosome1	90	50	4	1	930	978	1815539	1815490	4e-08	64	131	M
s_1_1_contig167072	gi|224381666|ref|NC_011462.1chromosome1	84.29	140	20	2	2157	2295	1815402	1815540	1e-32	147	3	S
s_1_1_contig247867	gi|224381666|ref|NC_011462.1chromosome1	80.41	194	33	4	2	194	1815382	1815571	1e-38	165	99	M
s_1_1_contig157784	gi|224381666|ref|NC_011462.1chromosome1	81.92	1200	157	18	4743	5923	1816800	1817958	0	1159	4	S
s_1_1_contig75851	gi|224381666|ref|NC_011462.1chromosome1	74.08	2407	359	51	13461	15807	1821385	1819184	0	1537	15	S
s_1_1_contig85931	gi|224381666|ref|NC_011462.1chromosome1	77.02	1210	204	20	688	1870	1840828	1841990	0	906	4	S
s_1_1_contig71487	gi|224381666|ref|NC_011462.1chromosome1	75.41	1464	251	24	4696	6126	1856395	1857782	0	1007	7	S
s_1_1_contig226252	gi|224381666|ref|NC_011462.1chromosome1	89.87	553	51	3	772	1324	1864187	1863640	0	737	1	S
s_1_1_contig87134	gi|224381666|ref|NC_011462.1chromosome1	76.08	2040	333	43	2177	4160	1869342	1871282	0	1425	8	S
s_1_1_contig100763	gi|224381666|ref|NC_011462.1chromosome1	74.31	2666	473	50	5451	8039	1889983	1887453	0	1685	8	S
s_1_1_contig50207	gi|224381666|ref|NC_011462.1chromosome1	74.29	2392	408	47	694	3053	1896771	1898987	0	1516	9	M
s_1_1_contig20574	gi|224381666|ref|NC_011462.1chromosome1	71.87	1422	259	32	99	1493	1912033	1910726	0	744	2	S
s_1_1_contig246836	gi|224381666|ref|NC_011462.1chromosome1	86.11	36	5	0	231	266	1921128	1921093	0.13	43	61	M
s_1_1_contig91435	gi|224381666|ref|NC_011462.1chromosome1	72.38	3353	565	75	4258	7452	1924904	1921755	0	1860	8	S
s_1_1_contig87714	gi|224381666|ref|NC_011462.1chromosome1	77.03	1328	196	26	2314	3575	1936660	1937944	0	1002	3	M
s_1_1_contig75443	gi|224381666|ref|NC_011462.1chromosome1	85.51	138	20	0	632	769	1955086	1955223	1e-35	159	315	M
s_1_1_contig57900	gi|224381666|ref|NC_011462.1chromosome1	78.25	2028	345	24	15526	17494	1959920	1961910	0	1647	19	M
s_1_1_contig104487	gi|224381666|ref|NC_011462.1chromosome1	75.66	1853	309	40	4993	6779	1983981	1982205	0	1256	5	S
s_1_1_contig75889	gi|224381666|ref|NC_011462.1chromosome1	73.85	1044	183	21	800	1795	2002913	2001912	2e-180	639	4	S
s_1_1_contig259563	gi|224381666|ref|NC_011462.1chromosome1	88.89	36	3	1	413	448	2004688	2004722	0.018	45	43	M
s_1_1_contig58003	gi|224381666|ref|NC_011462.1chromosome1	74.25	3142	527	70	845	3866	2004615	2007594	0	1957	39	M
s_1_1_contig76529	gi|224381666|ref|NC_011462.1chromosome1	69.51	246	42	4	7301	7531	2020415	2020642	2e-23	118	648	M
s_1_1_contig246065	gi|224381666|ref|NC_011462.1chromosome1	72.59	197	54	0	439	635	2020940	2020744	6e-23	113	33	M
s_1_1_contig207029	gi|224381666|ref|NC_011462.1chromosome1	73.95	215	56	0	830	1044	2020725	2020939	1e-29	136	2	S
s_1_1_contig107560	gi|224381666|ref|NC_011462.1chromosome1	75.94	877	171	14	3690	4566	2041017	2040181	2e-169	603	2	S
s_1_1_contig165526	gi|224381666|ref|NC_011462.1chromosome1	76.09	276	64	1	760	1033	2044401	2044676	5e-48	197	2	S
s_1_1_contig71266	gi|224381666|ref|NC_011462.1chromosome1	80.23	86	17	0	3330	3415	2046830	2046915	8e-12	79	66	M
s_1_1_contig72343	gi|224381666|ref|NC_011462.1chromosome1	77.19	1381	253	17	3171	4534	2051827	2053162	0	1050	5	S
s_1_1_contig117985	gi|224381666|ref|NC_011462.1chromosome1	75.44	1071	198	15	1419	2470	2062601	2061577	0	737	5	S
s_1_1_contig238599	gi|224381666|ref|NC_011462.1chromosome1	90.91	44	4	0	934	977	2062884	2062841	1e-07	63	938	M
s_1_1_contig198971	gi|224381666|ref|NC_011462.1chromosome1	70.55	618	140	9	494	1097	2068958	2069547	2e-76	291	1	S
s_1_1_contig229380	gi|224381666|ref|NC_011462.1chromosome1	67.87	803	147	20	717	1499	2070234	2070945	2e-77	295	1	S
s_1_1_contig165746	gi|224381666|ref|NC_011462.1chromosome1	72.42	1530	291	37	828	2334	2073032	2071611	0	809	1	S
s_1_1_contig33039	gi|224381666|ref|NC_011462.1chromosome1	65.94	866	142	32	117	935	2075029	2074270	5e-57	226	1	S
s_1_1_contig276415	gi|224381666|ref|NC_011462.1chromosome1	67.42	838	183	25	74	876	2075078	2075860	4e-64	250	1	S
s_1_1_contig116071	gi|224381666|ref|NC_011462.1chromosome1	70.64	1257	259	21	4067	5270	2081324	2080125	5e-171	609	982	M
s_1_1_contig26095	gi|224381666|ref|NC_011462.1chromosome1	69.29	381	53	10	1	367	2085099	2084769	1e-40	172	1	S
s_1_1_contig112356	gi|224381666|ref|NC_011462.1chromosome1	75.68	2628	463	47	611	3205	2087894	2085410	0	1806	2	S
s_1_1_contig76026	gi|224381666|ref|NC_011462.1chromosome1	77.07	1404	263	18	35	1432	2091793	2090443	0	1052	10	M
s_1_1_contig261060	gi|224381666|ref|NC_011462.1chromosome1	67.65	878	185	25	170	968	2092664	2091807	3e-73	280	1	S
s_1_1_contig176122	gi|224381666|ref|NC_011462.1chromosome1	88.89	36	2	1	932	967	2092080	2092047	0.042	45	54	M
s_1_1_contig247825	gi|224381666|ref|NC_011462.1chromosome1	88.89	36	2	1	579	614	2092080	2092047	0.045	45	74	M
s_1_1_contig60195	gi|224381666|ref|NC_011462.1chromosome1	80.34	651	113	10	2281	2921	2094472	2095117	1e-158	565	2	S
s_1_1_contig205226	gi|224381666|ref|NC_011462.1chromosome1	87.56	201	24	1	1013	1213	2095797	2095996	7e-63	246	1	S
s_1_1_contig58887	gi|224381666|ref|NC_011462.1chromosome1	74.24	524	97	9	2835	3353	2098010	2098500	1e-87	331	5	S
s_1_1_contig155186	gi|224381666|ref|NC_011462.1chromosome1	68.71	882	156	26	2833	3640	2100112	2100947	5e-90	338	2	S
s_1_1_contig256080	gi|224381666|ref|NC_011462.1chromosome1	77.45	204	35	3	14	216	2101371	2101178	2e-36	158	14	M
s_1_1_contig134354	gi|224381666|ref|NC_011462.1chromosome1	70.61	541	112	14	2231	2740	2102956	2103480	3e-60	239	1	S
s_1_1_contig13150	gi|224381666|ref|NC_011462.1chromosome1	72.21	1220	222	27	7	1202	2103916	2105042	0	655	1	S
s_1_1_contig61827	gi|224381666|ref|NC_011462.1chromosome1	70.76	1231	213	34	222	1431	2108903	2107799	1e-161	576	2	S
s_1_1_contig157706	gi|224381666|ref|NC_011462.1chromosome1	76.96	829	142	20	515	1337	2113490	2112705	2e-165	589	3	S
s_1_1_contig165355	gi|224381666|ref|NC_011462.1chromosome1	72.73	979	191	27	628	1587	2114089	2115010	1e-141	509	3	S
s_1_1_contig239108	gi|224381666|ref|NC_011462.1chromosome1	64.81	989	218	34	62	996	2116393	2117305	9e-43	179	1	S
s_1_1_contig41289	gi|224381666|ref|NC_011462.1chromosome1	71.72	442	90	15	406	828	2117917	2118342	2e-48	197	1	S
s_1_1_contig272488	gi|224381666|ref|NC_011462.1chromosome1	86.21	203	20	4	66	266	2119127	2118931	8e-58	230	1	S
s_1_1_contig13023	gi|224381666|ref|NC_011462.1chromosome1	73.84	952	188	22	4865	5785	2121205	2120284	9e-154	551	6	S
s_1_1_contig60794	gi|224381666|ref|NC_011462.1chromosome1	72.53	3546	677	83	32	3474	2127704	2124353	0	1898	1	S
s_1_1_contig263087	gi|224381666|ref|NC_011462.1chromosome1	70.06	688	124	25	2509	3161	2131836	2132476	2e-70	273	198	M
s_1_1_contig142831	gi|224381666|ref|NC_011462.1chromosome1	83.25	1176	145	23	2272	3433	2133718	2132581	0	1177	1	S
s_1_1_contig209162	gi|224381666|ref|NC_011462.1chromosome1	86.72	241	30	1	109	349	2134843	2135081	2e-75	288	1	S
s_1_1_contig260021	gi|224381666|ref|NC_011462.1chromosome1	76.22	185	38	4	584	766	2135136	2135316	6e-26	123	1	S
s_1_1_contig181432	gi|224381666|ref|NC_011462.1chromosome1	80.51	118	15	3	1245	1360	2135490	2135379	8e-20	104	78	M
s_1_1_contig114910	gi|224381666|ref|NC_011462.1chromosome1	70.68	1030	192	23	919	1896	2149867	2148896	1e-135	491	7	S
s_1_1_contig82343	gi|224381666|ref|NC_011462.1chromosome1	67.15	2627	541	66	2757	5241	2152413	2154859	0	839	3	S
s_1_1_contig190031	gi|224381666|ref|NC_011462.1chromosome1	96.43	28	1	0	589	616	2159552	2159525	0.009	46	31	M
s_1_1_contig158192	gi|224381666|ref|NC_011462.1chromosome1	78.77	570	101	10	40	597	2161935	2161374	2e-125	455	2	M
s_1_1_contig208932	gi|224381666|ref|NC_011462.1chromosome1	81.37	102	17	2	1	100	2176933	2177034	1e-16	92	13345	M
s_1_1_contig44700	gi|224381666|ref|NC_011462.1chromosome1	100	25	0	0	56	80	2187805	2187781	0.006	46	198	M
s_1_1_contig72695	gi|224381666|ref|NC_011462.1chromosome1	76.83	1554	257	27	16801	18322	2189196	2190678	0	1151	1909	M
s_1_1_contig53369	gi|224381666|ref|NC_011462.1chromosome1	68.21	2548	519	62	2374	4843	2194524	2196858	0	926	9	M
s_1_1_contig170589	gi|224381666|ref|NC_011462.1chromosome1	79.47	151	28	3	1141	1289	2199238	2199089	2e-25	122	7618	M
s_1_1_contig184480	gi|224381666|ref|NC_011462.1chromosome1	88.41	69	7	1	3029	3096	2213844	2213776	4e-14	86	9317	M
s_1_1_contig73958	gi|224381666|ref|NC_011462.1chromosome1	94.03	67	4	0	8	74	2213776	2213842	7e-20	104	17494	M
s_1_1_contig59977	gi|224381666|ref|NC_011462.1chromosome1	72.96	1017	185	24	8435	9404	2219734	2220707	2e-158	567	720	M
s_1_1_contig95058	gi|224381666|ref|NC_011462.1chromosome1	75.21	2973	549	45	1415	4273	2238475	2235577	0	2006	224	M
s_1_1_contig18062	gi|224381666|ref|NC_011462.1chromosome1	88.1	42	4	1	252	292	2236979	2237020	0.001	50	1280	M
s_1_1_contig128294	gi|224381666|ref|NC_011462.1chromosome1	68.91	1621	358	39	1010	2557	2243775	2242228	7e-171	607	1277	M
s_1_1_contig160605	gi|224381666|ref|NC_011462.1chromosome1	72.5	1527	280	22	10063	11545	2259931	2261361	0	888	5	S
s_1_1_contig74103	gi|224381666|ref|NC_011462.1chromosome1	72.03	1956	373	38	9983	11893	2271940	2273766	0	1047	19	M
s_1_1_contig39890	gi|224381666|ref|NC_011462.1chromosome1	91.46	82	7	0	190	271	2274450	2274531	5e-24	116	19964	M
s_1_1_contig3917	gi|224381666|ref|NC_011462.1chromosome1	79.22	799	137	13	2092	2878	2284808	2285589	0	661	9	S
s_1_1_contig96547	gi|224381666|ref|NC_011462.1chromosome1	74.66	2470	442	44	2695	5117	2293855	2291523	0	1600	9	S
s_1_1_contig270392	gi|224381666|ref|NC_011462.1chromosome1	79.63	108	22	0	803	910	2303402	2303509	6e-18	97	790	M
s_1_1_contig88318	gi|224381666|ref|NC_011462.1chromosome1	76.75	2847	419	48	5405	8112	2306621	2303879	0	2152	7	S
s_1_1_contig203989	gi|224381666|ref|NC_011462.1chromosome1	82.93	123	13	5	2362	2480	2311747	2311865	2e-22	113	4001	M
s_1_1_contig234475	gi|224381666|ref|NC_011462.1chromosome1	77.42	766	122	16	14	766	2315006	2315733	2e-162	576	1	S
s_1_1_contig161063	gi|224381666|ref|NC_011462.1chromosome1	74.22	1354	213	22	1301	2593	2316783	2318061	0	892	6	S
s_1_1_contig99311	gi|224381666|ref|NC_011462.1chromosome1	68.65	3675	744	110	2809	6372	2326246	2329623	0	1306	3	S
s_1_1_contig216871	gi|224381666|ref|NC_011462.1chromosome1	91.04	67	6	0	5272	5338	2331984	2332050	1e-16	95	18165	M
s_1_1_contig163655	gi|224381666|ref|NC_011462.1chromosome1	79.9	1234	155	19	2427	3582	2333554	2334772	0	1106	5	S
s_1_1_contig202342	gi|224381666|ref|NC_011462.1chromosome1	75.51	1556	283	37	410	1926	2336958	2338454	0	1011	2	S
s_1_1_contig227974	gi|224381666|ref|NC_011462.1chromosome1	74.23	485	78	7	2	483	2339211	2339651	9e-86	322	1	S
s_1_1_contig168464	gi|224381666|ref|NC_011462.1chromosome1	81.27	1041	116	17	22	1007	2342994	2341978	0	993	1	S
s_1_1_contig199871	gi|224381666|ref|NC_011462.1chromosome1	65.8	579	110	16	13	554	2343519	2342992	4e-37	159	1	S
s_1_1_contig264213	gi|224381666|ref|NC_011462.1chromosome1	70	130	35	2	173	301	2344193	2344067	0.0004	54	132	M
s_1_1_contig92903	gi|224381666|ref|NC_011462.1chromosome1	73.16	3234	547	79	777	3875	2350072	2353119	0	1853	3	S
s_1_1_contig246325	gi|224381666|ref|NC_011462.1chromosome1	74.09	386	58	8	50	423	2353386	2353741	2e-63	248	1	S
s_1_1_contig107760	gi|224381666|ref|NC_011462.1chromosome1	73.71	2583	465	50	1876	4381	2356457	2354012	0	1564	2	S
s_1_1_contig76327	gi|224381666|ref|NC_011462.1chromosome1	76.69	1583	284	24	1732	3286	2364070	2365595	0	1160	6	S
s_1_1_contig82360	gi|224381666|ref|NC_011462.1chromosome1	78.65	1583	240	30	19776	21273	2385126	2386695	0	1285	16	M
s_1_1_contig104628	gi|224381666|ref|NC_011462.1chromosome1	72.08	2403	443	45	2308	4673	2394464	2392253	0	1312	3	S
s_1_1_contig263146	gi|224381666|ref|NC_011462.1chromosome1	87.1	93	11	1	1648	1740	2398779	2398688	6e-22	111	14999	M
s_1_1_contig159869	gi|224381666|ref|NC_011462.1chromosome1	79.77	687	112	13	2818	3497	2399592	2398926	3e-162	578	3	S
s_1_1_contig129135	gi|224381666|ref|NC_011462.1chromosome1	70.17	1257	219	28	1006	2182	2403015	2404195	5e-166	590	3	S
s_1_1_contig137709	gi|224381666|ref|NC_011462.1chromosome1	71.74	1953	349	42	24	1935	2410264	2408474	0	1027	1	S
s_1_1_contig215699	gi|224381666|ref|NC_011462.1chromosome1	72.39	1253	225	27	74	1269	2412857	2411669	0	688	1	S
s_1_1_contig91750	gi|224381666|ref|NC_011462.1chromosome1	77.15	2967	455	51	1577	4464	2420010	2422832	0	2266	9	S
s_1_1_contig108100	gi|224381666|ref|NC_011462.1chromosome1	72.79	1426	276	26	1740	3126	2433742	2432390	0	807	2	S
s_1_1_contig128586	gi|224381666|ref|NC_011462.1chromosome1	71.83	1342	208	35	4435	5748	2438316	2437117	0	711	9	S
s_1_1_contig57508	gi|224381666|ref|NC_011462.1chromosome1	75.22	1735	318	38	1485	3137	2460987	2459283	0	1121	65	M
s_1_1_contig247664	gi|224381666|ref|NC_011462.1chromosome1	79.22	741	117	9	255	962	2463908	2464644	4e-180	636	1	S
s_1_1_contig114838	gi|224381666|ref|NC_011462.1chromosome1	68.8	2051	404	46	17	1956	2464692	2466617	0	820	3	S
s_1_1_contig147987	gi|224381666|ref|NC_011462.1chromosome1	74.14	897	141	24	16	903	2468455	2469269	1e-152	545	3	S
s_1_1_contig154824	gi|224381666|ref|NC_011462.1chromosome1	75.66	2851	460	45	3501	6253	2475520	2472806	0	2021	6	S
s_1_1_contig107073	gi|224381666|ref|NC_011462.1chromosome1	74.63	3670	662	68	4183	7753	2484992	2488491	0	2358	5	S
s_1_1_contig269233	gi|224381666|ref|NC_011462.1chromosome1	68.59	1251	253	22	37	1275	2488488	2489610	1e-142	511	1	S
s_1_1_contig163624	gi|224381666|ref|NC_011462.1chromosome1	76.68	1501	272	22	20	1483	2492734	2491275	0	1101	1	S
s_1_1_contig135065	gi|224381666|ref|NC_011462.1chromosome1	76.95	1753	295	26	462	2171	2495228	2493542	0	1321	2	S
s_1_1_contig56072	gi|224381666|ref|NC_011462.1chromosome1	73.74	3538	630	72	232	3648	2496106	2499465	0	2138	9	S
s_1_1_contig215934	gi|224381666|ref|NC_011462.1chromosome1	74.9	992	176	16	49	991	2512004	2511037	0	661	1	S
s_1_1_contig92896	gi|224381666|ref|NC_011462.1chromosome1	77.02	979	176	21	1527	2477	2515027	2515984	0	700	5	S
s_1_1_contig78291	gi|224381666|ref|NC_011462.1chromosome1	75.13	1150	186	25	552	1653	2527917	2526820	0	762	3	S
s_1_1_contig17667	gi|224381666|ref|NC_011462.1chromosome1	74.68	624	143	6	20	629	2528405	2529027	3e-109	399	1	S
s_1_1_contig247364	gi|224381666|ref|NC_011462.1chromosome1	79.52	415	52	5	10	402	2530067	2529664	3e-101	372	1	S
s_1_1_contig73291	gi|224381666|ref|NC_011462.1chromosome1	73.37	1979	360	38	5906	7819	2532171	2530295	0	1173	4	S
s_1_1_contig266600	gi|224381666|ref|NC_011462.1chromosome1	88.89	36	3	1	2316	2350	2535522	2535557	0.091	45	64	M
s_1_1_contig197085	gi|224381666|ref|NC_011462.1chromosome1	87.41	135	13	3	718	852	2535533	2535663	2e-36	158	810	M
s_1_1_contig265935	gi|224381666|ref|NC_011462.1chromosome1	73.78	2628	452	52	2977	5476	2542186	2539668	0	1613	58	M
s_1_1_contig190667	gi|224381666|ref|NC_011462.1chromosome1	82	50	8	1	735	783	2541234	2541185	0.01	46	44	M
s_1_1_contig120376	gi|224381666|ref|NC_011462.1chromosome1	65.97	761	147	21	1350	2048	2568007	2568717	4e-52	212	3	S
s_1_1_contig115397	gi|224381666|ref|NC_011462.1chromosome1	76.38	436	99	3	6661	7094	2569805	2570238	4e-82	313	2	S
s_1_1_contig23076	gi|224381666|ref|NC_011462.1chromosome1	78.57	126	25	1	776	899	2574651	2574776	4e-20	104	47	M
s_1_1_contig168108	gi|224381666|ref|NC_011462.1chromosome1	75.3	1069	163	31	1384	2406	2576487	2575474	0	690	1	S
s_1_1_contig145848	gi|224381666|ref|NC_011462.1chromosome1	79.4	199	30	7	1026	1216	2576755	2576560	6e-34	152	78	M
s_1_1_contig49836	gi|224381666|ref|NC_011462.1chromosome1	72.36	2558	461	60	2264	4699	2580997	2583430	0	1377	6	S
s_1_1_contig171852	gi|224381666|ref|NC_011462.1chromosome1	74.59	370	51	8	42	381	2593390	2593034	5e-63	246	1	S
s_1_1_contig36062	gi|224381666|ref|NC_011462.1chromosome1	75.24	311	54	4	21	329	2593996	2593707	3e-54	217	2	S
s_1_1_contig207681	gi|224381666|ref|NC_011462.1chromosome1	78.19	321	49	4	23	337	2594424	2594729	2e-68	264	2	S
s_1_1_contig1530	gi|224381666|ref|NC_011462.1chromosome1	68.97	203	47	4	120	321	2596918	2596731	9e-13	79	85	M
s_1_1_contig44027	gi|224381666|ref|NC_011462.1chromosome1	81.26	475	65	6	29	486	2600295	2599828	1e-124	450	2	S
s_1_1_contig198645	gi|224381666|ref|NC_011462.1chromosome1	75	148	29	2	3	142	2603158	2603011	2e-18	99	47	M
s_1_1_contig75327	gi|224381666|ref|NC_011462.1chromosome1	73.47	1440	280	24	4581	5983	2607595	2608969	0	859	9	S
s_1_1_contig115298	gi|224381666|ref|NC_011462.1chromosome1	73.93	679	93	20	3916	4578	2619152	2619762	4e-112	412	139	M
s_1_1_contig61290	gi|224381666|ref|NC_011462.1chromosome1	68.9	1103	246	17	1200	2290	2621434	2622451	2e-124	453	19	M
s_1_1_contig130705	gi|224381666|ref|NC_011462.1chromosome1	76.39	449	83	6	4119	4556	2628334	2627898	4e-86	325	2	S
s_1_1_contig96084	gi|224381666|ref|NC_011462.1chromosome1	74.24	524	87	8	3276	3791	2636883	2637366	1e-91	343	1	S
s_1_1_contig268165	gi|224381666|ref|NC_011462.1chromosome1	71.38	821	177	15	926	1728	2639296	2638516	9e-111	407	1	S
s_1_1_contig66385	gi|224381666|ref|NC_011462.1chromosome1	75.99	3961	673	63	26	3941	2639827	2643554	0	2823	8	S
s_1_1_contig53034	gi|224381666|ref|NC_011462.1chromosome1	77.11	83	15	1	3489	3567	2657658	2657740	2e-07	64	265	M
s_1_1_contig80801	gi|224381666|ref|NC_011462.1chromosome1	84.97	1098	137	17	3925	5015	2661375	2660299	0	1186	3	S
s_1_1_contig180248	gi|224381666|ref|NC_011462.1chromosome1	78.92	688	105	10	813	1476	2665123	2665794	1e-162	578	1	S
s_1_1_contig265178	gi|224381666|ref|NC_011462.1chromosome1	74.74	784	155	15	678	1437	2666969	2667733	7e-137	493	2	S
s_1_1_contig147302	gi|224381666|ref|NC_011462.1chromosome1	74.76	1161	220	17	179	1316	2669916	2668806	0	762	1	S
s_1_1_contig227545	gi|224381666|ref|NC_011462.1chromosome1	73.36	2098	338	36	743	2767	2670572	2672521	0	1301	87	M
s_1_1_contig228285	gi|224381666|ref|NC_011462.1chromosome1	76.09	527	100	7	1056	1582	2673619	2674119	3e-101	374	2	S
s_1_1_contig69535	gi|224381666|ref|NC_011462.1chromosome1	72.71	1286	232	37	100	1352	2684573	2683374	0	677	24	M
s_1_1_contig231187	gi|224381666|ref|NC_011462.1chromosome1	75.88	1455	240	14	22	1397	2687185	2685763	0	1079	2	S
s_1_1_contig70361	gi|224381666|ref|NC_011462.1chromosome1	73.92	1269	265	26	1176	2425	2688931	2687710	0	738	2	S
s_1_1_contig194701	gi|224381666|ref|NC_011462.1chromosome1	73.92	786	153	15	1565	2327	2693668	2694424	6e-131	473	3	S
s_1_1_contig91752	gi|224381666|ref|NC_011462.1chromosome1	75.54	2482	450	34	372	2782	2695349	2697744	0	1728	4	S
s_1_1_contig142073	gi|224381666|ref|NC_011462.1chromosome1	76.39	610	107	13	1496	2076	2701295	2701896	9e-117	426	2	S
s_1_1_contig84602	gi|224381666|ref|NC_011462.1chromosome1	72.03	1087	196	21	455	1503	2703388	2702372	6e-167	592	1	S
s_1_1_contig70911	gi|224381666|ref|NC_011462.1chromosome1	77.93	3503	562	52	112	3487	2703620	2707038	0	2789	3	S
s_1_1_contig75283	gi|224381666|ref|NC_011462.1chromosome1	80.27	806	128	9	3588	4366	2711613	2710812	0	724	96	M
s_1_1_contig192253	gi|224381666|ref|NC_011462.1chromosome1	72.5	971	176	25	1	900	2717190	2716240	2e-144	517	2	S
s_1_1_contig34826	gi|224381666|ref|NC_011462.1chromosome1	75	648	106	8	68	666	2721585	2720945	1e-125	453	2	S
s_1_1_contig152385	gi|224381666|ref|NC_011462.1chromosome1	72.71	1114	197	30	715	1782	2723146	2724198	6e-169	600	2	S
s_1_1_contig4389	gi|224381666|ref|NC_011462.1chromosome1	70.02	804	182	15	726	1476	2725089	2724292	1e-93	349	1	S
s_1_1_contig240843	gi|224381666|ref|NC_011462.1chromosome1	76.47	85	18	2	806	889	2726264	2726181	1e-05	57	101	M
s_1_1_contig13100	gi|224381666|ref|NC_011462.1chromosome1	80.95	399	62	4	8	397	2729702	2729309	1e-100	372	2	S
s_1_1_contig48537	gi|224381666|ref|NC_011462.1chromosome1	83.43	857	115	10	27	874	2730526	2729688	0	884	1	S
s_1_1_contig110967	gi|224381666|ref|NC_011462.1chromosome1	72.89	1398	242	26	766	2145	2732031	2733309	0	820	2	S
s_1_1_contig134015	gi|224381666|ref|NC_011462.1chromosome1	79.5	1171	216	9	1	1162	2736724	2735569	0	1011	2	S
s_1_1_contig266584	gi|224381666|ref|NC_011462.1chromosome1	71.19	2350	488	53	13	2289	2736908	2739141	0	1117	3	S
s_1_1_contig83317	gi|224381666|ref|NC_011462.1chromosome1	70.13	472	107	6	3865	4303	2739751	2739281	1e-53	219	1	S
s_1_1_contig207971	gi|224381666|ref|NC_011462.1chromosome1	69.23	390	82	8	3	356	2739748	2739361	9e-37	161	18	M
s_1_1_contig276269	gi|224381666|ref|NC_011462.1chromosome1	77.61	335	61	7	1370	1696	2739848	2739520	3e-63	248	48	M
s_1_1_contig238855	gi|224381666|ref|NC_011462.1chromosome1	83.2	125	19	1	1	125	2739692	2739570	9e-28	129	1	S
s_1_1_contig212256	gi|224381666|ref|NC_011462.1chromosome1	79.87	149	29	1	90	238	2739520	2739667	5e-28	131	2	M
s_1_1_contig67705	gi|224381666|ref|NC_011462.1chromosome1	72.66	256	45	4	6986	7234	2739471	2739708	3e-33	150	5	M
s_1_1_contig241244	gi|224381666|ref|NC_011462.1chromosome1	74.27	443	85	8	914	1350	2739329	2739748	2e-71	275	32	M
s_1_1_contig247974	gi|224381666|ref|NC_011462.1chromosome1	78.5	386	72	3	313	696	2739388	2739764	8e-85	318	568	M
s_1_1_contig40385	gi|224381666|ref|NC_011462.1chromosome1	88.24	34	4	0	500	533	2741900	2741933	0.03	45	16	M
s_1_1_contig153891	gi|224381666|ref|NC_011462.1chromosome1	69.6	796	138	16	934	1663	2743352	2742595	4e-99	367	1	S
s_1_1_contig28331	gi|224381666|ref|NC_011462.1chromosome1	72.07	580	114	11	622	1194	2744143	2744681	7e-82	309	1	S
s_1_1_contig46533	gi|224381666|ref|NC_011462.1chromosome1	80.77	52	8	1	376	425	2747267	2747318	0.007	46	51	M
s_1_1_contig64136	gi|224381666|ref|NC_011462.1chromosome1	75.21	2041	374	34	1937	3948	2746029	2747966	0	1366	13	M
s_1_1_contig147956	gi|224381666|ref|NC_011462.1chromosome1	69.59	217	62	4	1389	1603	2754737	2754951	1e-12	81	99	M
s_1_1_contig90815	gi|224381666|ref|NC_011462.1chromosome1	77.82	2083	372	30	2651	4696	2761801	2763830	0	1620	4	S
s_1_1_contig207814	gi|224381666|ref|NC_011462.1chromosome1	71.73	421	101	7	29	432	2767892	2767473	9e-52	208	1	S
s_1_1_contig98870	gi|224381666|ref|NC_011462.1chromosome1	74.57	1046	225	18	2180	3209	2766703	2767723	0	643	3	S
s_1_1_contig252571	gi|224381666|ref|NC_011462.1chromosome1	80.32	371	62	8	5	371	2767905	2768268	8e-84	315	1	S
s_1_1_contig141816	gi|224381666|ref|NC_011462.1chromosome1	73.56	1184	252	21	73	1238	2767810	2768950	0	684	2	S
s_1_1_contig183233	gi|224381666|ref|NC_011462.1chromosome1	77.63	930	138	14	59	971	2771626	2770750	0	740	1	S
s_1_1_contig207384	gi|224381666|ref|NC_011462.1chromosome1	76.05	643	104	13	1075	1679	2776585	2775955	1e-124	452	3	S
s_1_1_contig162144	gi|224381666|ref|NC_011462.1chromosome1	71.61	1617	293	35	93	1648	2780030	2778519	0	839	3	S
s_1_1_contig100451	gi|224381666|ref|NC_011462.1chromosome1	78.73	837	156	11	3614	4437	2789442	2788615	0	677	240	M
s_1_1_contig96121	gi|224381666|ref|NC_011462.1chromosome1	80.59	1077	163	17	4446	5494	2792536	2791478	0	966	8	S
s_1_1_contig269526	gi|224381666|ref|NC_011462.1chromosome1	71.83	497	96	12	24	505	2797118	2797585	2e-64	251	2	S
s_1_1_contig94230	gi|224381666|ref|NC_011462.1chromosome1	80.74	1277	206	16	5797	7049	2803017	2804277	0	1159	4	S
s_1_1_contig178652	gi|224381666|ref|NC_011462.1chromosome1	75.05	473	96	9	30	493	2805772	2805313	2e-79	300	1	S
s_1_1_contig151550	gi|224381666|ref|NC_011462.1chromosome1	70.09	739	148	17	1647	2335	2806794	2807509	2e-86	325	3	S
s_1_1_contig169025	gi|224381666|ref|NC_011462.1chromosome1	75.61	2198	357	45	19	2168	2810331	2808265	0	1507	1	S
s_1_1_contig177548	gi|224381666|ref|NC_011462.1chromosome1	71.89	2195	431	45	3	2118	2812415	2810328	0	1142	1	S
s_1_1_contig10434	gi|224381666|ref|NC_011462.1chromosome1	72.74	1049	208	21	826	1836	2813544	2812536	1e-162	578	2	S
s_1_1_contig260994	gi|224381666|ref|NC_011462.1chromosome1	74.12	1074	179	18	37	1061	2814721	2815744	0	691	1	S
s_1_1_contig105506	gi|224381666|ref|NC_011462.1chromosome1	72.61	2366	409	41	2929	5213	2817956	2815749	0	1377	3	S
s_1_1_contig252055	gi|224381666|ref|NC_011462.1chromosome1	80.2	399	66	6	81	470	2821438	2821044	3e-94	349	1	S
s_1_1_contig237468	gi|224381666|ref|NC_011462.1chromosome1	73.84	558	80	19	24	523	2822015	2821466	6e-86	322	1	S
s_1_1_contig167258	gi|224381666|ref|NC_011462.1chromosome1	75.2	746	136	9	1225	1936	2822979	2823709	2e-143	515	1	S
s_1_1_contig125106	gi|224381666|ref|NC_011462.1chromosome1	76.41	1997	325	38	3	1972	2827919	2826042	0	1438	2	S
s_1_1_contig80924	gi|224381666|ref|NC_011462.1chromosome1	81.89	1739	246	24	752	2458	2828374	2830075	0	1671	4	S
s_1_1_contig32208	gi|224381666|ref|NC_011462.1chromosome1	71.2	632	124	12	29	646	2834372	2834959	2e-84	318	2	S
s_1_1_contig116895	gi|224381666|ref|NC_011462.1chromosome1	72.78	2641	489	54	1	2571	2837126	2839606	0	1485	1	S
s_1_1_contig156641	gi|224381666|ref|NC_011462.1chromosome1	73.1	985	218	20	13	971	2839637	2840600	2e-149	535	2	S
s_1_1_contig148639	gi|224381666|ref|NC_011462.1chromosome1	73.47	1387	241	34	795	2124	2843705	2842389	0	803	3	S
s_1_1_contig31622	gi|224381666|ref|NC_011462.1chromosome1	75.38	524	98	9	680	1200	2846644	2846149	2e-94	351	2	S
s_1_1_contig194901	gi|224381666|ref|NC_011462.1chromosome1	81.67	420	76	1	9	427	2847499	2847918	7e-111	407	1	S
s_1_1_contig269444	gi|224381666|ref|NC_011462.1chromosome1	73.3	427	86	7	12	437	2849093	2848694	2e-64	250	1	S
s_1_1_contig81169	gi|224381666|ref|NC_011462.1chromosome1	77.69	3510	593	53	4049	7498	2854109	2857488	0	2733	3	S
s_1_1_contig221580	gi|224381666|ref|NC_011462.1chromosome1	72.31	2243	431	49	2475	4590	2862892	2865071	0	1196	3	S
s_1_1_contig110138	gi|224381666|ref|NC_011462.1chromosome1	74.53	1213	238	24	2405	3584	2873057	2871883	0	751	9	M
s_1_1_contig157053	gi|224381666|ref|NC_011462.1chromosome1	81.47	912	125	9	1096	1988	2876496	2877382	0	883	6	S
s_1_1_contig276035	gi|224381666|ref|NC_011462.1chromosome1	77.42	186	38	3	1119	1302	2886299	2886116	1e-29	136	9	M
s_1_1_contig65532	gi|224381666|ref|NC_011462.1chromosome1	69.86	1772	347	31	1522	3200	2886317	2887994	0	818	2	S
s_1_1_contig200654	gi|224381666|ref|NC_011462.1chromosome1	72.55	499	105	10	416	908	2888470	2888942	6e-69	266	1	S
s_1_1_contig94220	gi|224381666|ref|NC_011462.1chromosome1	79.56	1145	178	19	751	1879	2890138	2889034	0	975	1	S
s_1_1_contig67651	gi|224381666|ref|NC_011462.1chromosome1	78.46	1801	304	37	1651	3429	2898599	2896861	0	1407	6	S
s_1_1_contig110951	gi|224381666|ref|NC_011462.1chromosome1	74.95	2663	433	49	3832	6415	2906479	2908986	0	1786	312	M
s_1_1_contig217960	gi|224381666|ref|NC_011462.1chromosome1	90.91	33	3	0	1927	1959	2913267	2913235	0.055	46	150	M
s_1_1_contig202496	gi|224381666|ref|NC_011462.1chromosome1	84.21	38	6	0	1296	1333	2914756	2914719	0.27	43	16	M
s_1_1_contig249861	gi|224381666|ref|NC_011462.1chromosome1	77.96	422	60	7	5	395	2916315	2916734	3e-91	340	1	S
s_1_1_contig212699	gi|224381666|ref|NC_011462.1chromosome1	68.51	416	98	10	1	397	2917261	2916860	9e-33	145	1	S
s_1_1_contig203942	gi|224381666|ref|NC_011462.1chromosome1	78.49	925	170	9	4531	5441	2918486	2917577	0	756	3	S
s_1_1_contig185104	gi|224381666|ref|NC_011462.1chromosome1	67.09	623	128	16	47	611	2922326	2921723	2e-48	197	1	S
s_1_1_contig99441	gi|224381666|ref|NC_011462.1chromosome1	73.25	2112	434	49	2605	4644	2925657	2927709	0	1159	5	S
s_1_1_contig28379	gi|224381666|ref|NC_011462.1chromosome1	70.8	1274	278	23	1	1238	2930203	2931418	9e-170	601	1	S
s_1_1_contig113330	gi|224381666|ref|NC_011462.1chromosome1	74.96	2332	402	49	150	2431	2933748	2931549	0	1516	1	S
s_1_1_contig50595	gi|224381666|ref|NC_011462.1chromosome1	72.32	2392	418	49	139	2353	2934023	2936347	0	1328	3	S
s_1_1_contig22603	gi|224381666|ref|NC_011462.1chromosome1	65.85	773	176	19	57	801	2941237	2940525	5e-48	197	56	M
s_1_1_contig59492	gi|224381666|ref|NC_011462.1chromosome1	76.87	1695	252	30	1266	2872	2950545	2948903	0	1281	5	S
s_1_1_contig267088	gi|224381666|ref|NC_011462.1chromosome1	69.53	699	133	19	1	650	2952566	2951899	1e-75	288	1	S
s_1_1_contig127734	gi|224381666|ref|NC_011462.1chromosome1	76.16	776	129	12	2028	2772	2955460	2954710	3e-157	562	4	S
s_1_1_contig221679	gi|224381666|ref|NC_011462.1chromosome1	69.4	1461	303	31	50	1449	2958668	2957291	3e-172	610	1	S
s_1_1_contig91630	gi|224381666|ref|NC_011462.1chromosome1	76.19	987	173	14	790	1745	2961498	2960543	0	713	2	S
s_1_1_contig104750	gi|224381666|ref|NC_011462.1chromosome1	73.7	1540	276	38	1507	2995	2963375	2961914	0	897	2	S
s_1_1_contig50158	gi|224381666|ref|NC_011462.1chromosome1	74.82	2236	352	49	3244	5425	2965865	2967943	0	1463	1	S
s_1_1_contig127307	gi|224381666|ref|NC_011462.1chromosome1	75.48	1415	280	25	1300	2682	2969342	2967963	0	935	1	S
s_1_1_contig280788	gi|224381666|ref|NC_011462.1chromosome1	73.06	438	89	9	21	457	2969942	2969533	1e-62	244	1	S
s_1_1_contig135497	gi|224381666|ref|NC_011462.1chromosome1	78.66	1387	241	19	1123	2478	2974382	2973020	0	1131	1	S
s_1_1_contig96933	gi|224381666|ref|NC_011462.1chromosome1	70.46	1422	293	24	2451	3810	2971667	2973023	0	677	2	S
s_1_1_contig163729	gi|224381666|ref|NC_011462.1chromosome1	73.42	1031	159	27	15	1028	2979093	2978161	6e-171	607	4	S
s_1_1_contig101726	gi|224381666|ref|NC_011462.1chromosome1	71.21	1431	244	33	2360	3744	2985648	2986956	0	726	3	S
s_1_1_contig264005	gi|224381666|ref|NC_011462.1chromosome1	71.81	1472	306	32	9	1407	2990322	2988887	0	738	3	S
s_1_1_contig134966	gi|224381666|ref|NC_011462.1chromosome1	72.47	890	188	16	1221	2083	2991252	2990393	3e-133	480	125	M
s_1_1_contig91313	gi|224381666|ref|NC_011462.1chromosome1	79.74	2690	394	34	9578	12179	2994680	2992054	0	2378	5	S
s_1_1_contig190508	gi|224381666|ref|NC_011462.1chromosome1	76.25	80	13	2	384	463	2996902	2996829	2e-05	55	81	M
s_1_1_contig275486	gi|224381666|ref|NC_011462.1chromosome1	74.32	592	98	9	10	591	3008500	3009047	1e-106	390	1	S
s_1_1_contig185165	gi|224381666|ref|NC_011462.1chromosome1	67.64	921	206	25	1	904	3010634	3009789	2e-75	288	15	M
s_1_1_contig174231	gi|224381666|ref|NC_011462.1chromosome1	73.16	2724	510	55	364	3012	3010755	3013332	0	1568	1	S
s_1_1_contig4713	gi|224381666|ref|NC_011462.1chromosome1	75.83	1291	210	28	1	1231	3013396	3014644	0	888	1	S
s_1_1_contig14155	gi|224381666|ref|NC_011462.1chromosome1	75.78	1903	341	32	3	1834	3019428	3017575	0	1317	3	S
s_1_1_contig13983	gi|224381666|ref|NC_011462.1chromosome1	74.36	1361	235	26	2	1319	3020809	3019520	0	866	1	S
s_1_1_contig16364	gi|224381666|ref|NC_011462.1chromosome1	76.94	1804	273	35	23	1776	3020790	3022500	0	1350	1	S
s_1_1_contig120244	gi|224381666|ref|NC_011462.1chromosome1	70.27	4292	893	105	1	4110	3022521	3026611	0	1860	3	S
s_1_1_contig277557	gi|224381666|ref|NC_011462.1chromosome1	69.42	412	104	5	22	428	3028391	3028785	6e-41	172	1	S
s_1_1_contig11307	gi|224381666|ref|NC_011462.1chromosome1	75.39	512	105	10	12	507	3031575	3031069	1e-87	329	1	S
s_1_1_contig56135	gi|224381666|ref|NC_011462.1chromosome1	74.18	2715	512	53	4543	7189	3036712	3039305	0	1667	3	S
s_1_1_contig220697	gi|224381666|ref|NC_011462.1chromosome1	69.88	1162	223	23	160	1259	3040551	3039455	4e-148	529	1	S
s_1_1_contig37101	gi|224381666|ref|NC_011462.1chromosome1	72.18	435	96	9	88	516	3042170	3041755	1e-55	221	1	S
s_1_1_contig1291	gi|224381666|ref|NC_011462.1chromosome1	79.17	264	34	5	1	253	3043724	3043471	1e-56	224	1	S
s_1_1_contig6617	gi|224381666|ref|NC_011462.1chromosome1	77.44	1015	188	14	732	1720	3044926	3043927	0	773	2	S
s_1_1_contig264277	gi|224381666|ref|NC_011462.1chromosome1	68.36	1438	272	36	239	1629	3045899	3047200	2e-152	545	3	S
s_1_1_contig38972	gi|224381666|ref|NC_011462.1chromosome1	69.06	1225	242	27	55	1179	3050686	3051873	6e-140	502	1	S
s_1_1_contig240393	gi|224381666|ref|NC_011462.1chromosome1	69.4	562	112	12	1	515	3051815	3052363	1e-60	239	1	S
s_1_1_contig135599	gi|224381666|ref|NC_011462.1chromosome1	73.19	1667	312	37	2457	4077	3053823	3055400	0	946	2	S
s_1_1_contig272535	gi|224381666|ref|NC_011462.1chromosome1	79.24	766	127	12	63	825	3056170	3055434	0	639	1	S
s_1_1_contig53893	gi|224381666|ref|NC_011462.1chromosome1	79.33	2458	365	41	1	2419	3056199	3058552	0	2087	1	S
s_1_1_contig14317	gi|224381666|ref|NC_011462.1chromosome1	78.66	1631	247	25	12	1602	3058591	3060160	0	1352	1	S
s_1_1_contig171993	gi|224381666|ref|NC_011462.1chromosome1	76.74	705	132	8	35	731	3060213	3060893	7e-147	526	1	S
s_1_1_contig101043	gi|224381666|ref|NC_011462.1chromosome1	72.46	501	93	11	4635	5114	3068770	3068294	2e-70	273	3	M
s_1_1_contig77486	gi|224381666|ref|NC_011462.1chromosome1	72.7	5275	909	111	4801	9783	3074727	3069692	0	3000	17	M
s_1_1_contig116207	gi|224381666|ref|NC_011462.1chromosome1	74.39	2105	390	40	707	2764	3086276	3084274	0	1321	4	S
s_1_1_contig126871	gi|224381666|ref|NC_011462.1chromosome1	74.72	1780	313	39	400	2132	3090095	3088406	0	1130	3	S
s_1_1_contig96779	gi|224381666|ref|NC_011462.1chromosome1	74.9	4139	668	76	2225	6300	3098526	3094696	0	2773	4	S
s_1_1_contig56186	gi|224381666|ref|NC_011462.1chromosome1	73.45	1793	353	31	2	1713	3099548	3101298	0	1059	2	S
s_1_1_contig71087	gi|224381666|ref|NC_011462.1chromosome1	77.18	1525	267	25	1613	3076	3108572	3107068	0	1142	4	S
s_1_1_contig224636	gi|224381666|ref|NC_011462.1chromosome1	94.12	34	2	0	3683	3716	3109529	3109496	0.0003	54	197	M
s_1_1_contig122901	gi|224381666|ref|NC_011462.1chromosome1	78.9	2090	343	26	660	2733	3110917	3112924	0	1752	2	S
s_1_1_contig64039	gi|224381666|ref|NC_011462.1chromosome1	83.5	1230	174	10	4974	6186	3117510	3116293	0	1285	4	S
s_1_1_contig154792	gi|224381666|ref|NC_011462.1chromosome1	71.33	450	93	10	33	465	3124040	3123610	3e-54	217	2	S
s_1_1_contig154952	gi|224381666|ref|NC_011462.1chromosome1	78.65	2286	323	39	22	2238	3124057	3126246	0	1896	1	S
s_1_1_contig239332	gi|224381666|ref|NC_011462.1chromosome1	78.12	1426	228	20	37	1429	3126255	3127629	0	1151	1	S
s_1_1_contig118848	gi|224381666|ref|NC_011462.1chromosome1	77.52	1557	266	22	3262	4806	3131269	3132753	0	1207	3	S
s_1_1_contig43916	gi|224381666|ref|NC_011462.1chromosome1	79.69	64	8	4	75	135	3138644	3138583	0.026	45	46	M
s_1_1_contig239315	gi|224381666|ref|NC_011462.1chromosome1	94.64	56	3	0	3	58	3139121	3139066	3e-15	88	11124	M
s_1_1_contig103553	gi|224381666|ref|NC_011462.1chromosome1	83.06	1535	223	11	9939	11461	3140957	3142466	0	1581	1327	M
s_1_1_contig147027	gi|224381666|ref|NC_011462.1chromosome1	70.76	2856	511	71	469	3174	3149074	3146393	0	1359	2	S
s_1_1_contig266945	gi|224381666|ref|NC_011462.1chromosome1	74.84	310	59	4	16	315	3150537	3150237	6e-51	206	1	S
s_1_1_contig65887	gi|224381666|ref|NC_011462.1chromosome1	77.07	2089	331	36	3559	5614	3155710	3153737	0	1579	4	S
s_1_1_contig213297	gi|224381666|ref|NC_011462.1chromosome1	77.86	533	104	8	1	527	3160093	3160617	2e-111	407	1	S
s_1_1_contig80556	gi|224381666|ref|NC_011462.1chromosome1	76.87	2088	309	41	30	2066	3164982	3163018	0	1561	2	S
s_1_1_contig48692	gi|224381666|ref|NC_011462.1chromosome1	78.24	1043	154	17	64	1086	3166377	3165388	0	847	1	S
s_1_1_contig173818	gi|224381666|ref|NC_011462.1chromosome1	71.1	346	66	6	287	627	3166753	3167069	2e-42	178	1	S
s_1_1_contig194865	gi|224381666|ref|NC_011462.1chromosome1	77.09	3160	549	48	2064	5133	3169297	3172371	0	2376	2	S
s_1_1_contig208129	gi|224381666|ref|NC_011462.1chromosome1	72.87	446	64	9	8	439	3172966	3172564	3e-70	269	1	S
s_1_1_contig209638	gi|224381666|ref|NC_011462.1chromosome1	85.11	47	7	0	5535	5581	3173954	3174000	0.0004	54	96	M
s_1_1_contig174926	gi|224381666|ref|NC_011462.1chromosome1	87.23	47	6	0	4	50	3177049	3177095	1e-06	59	468	M
s_1_1_contig82064	gi|224381666|ref|NC_011462.1chromosome1	76.04	2391	416	37	2214	4550	3177493	3179780	0	1703	3	S
s_1_1_contig62565	gi|224381666|ref|NC_011462.1chromosome1	73.32	1634	249	35	854	2411	3184401	3182879	0	993	3	S
s_1_1_contig170223	gi|224381666|ref|NC_011462.1chromosome1	81.32	910	142	14	79	980	3185449	3186338	0	838	563	M
s_1_1_contig278668	gi|224381666|ref|NC_011462.1chromosome1	93.55	31	1	1	1	31	3188341	3188370	0.02	45	497	M
s_1_1_contig65617	gi|224381666|ref|NC_011462.1chromosome1	77.42	2303	382	41	10675	12905	3193153	3190917	0	1748	160	M
s_1_1_contig243677	gi|224381666|ref|NC_011462.1chromosome1	83.87	62	9	1	429	489	3194614	3194553	2e-08	64	996	M
s_1_1_contig273885	gi|224381666|ref|NC_011462.1chromosome1	66.15	780	137	18	31	786	3204702	3205378	4e-64	250	2	S
s_1_1_contig159740	gi|224381666|ref|NC_011462.1chromosome1	76.14	1274	229	22	1673	2920	3217731	3216507	0	895	5	S
s_1_1_contig61800	gi|224381666|ref|NC_011462.1chromosome1	72.92	4978	888	108	6006	10835	3222845	3227510	0	2828	9	S
s_1_1_contig227706	gi|224381666|ref|NC_011462.1chromosome1	74.22	1152	207	22	226	1342	3234264	3233168	0	720	1	S
s_1_1_contig174916	gi|224381666|ref|NC_011462.1chromosome1	68.54	693	154	14	783	1459	3235008	3234364	1e-67	262	1	S
s_1_1_contig123468	gi|224381666|ref|NC_011462.1chromosome1	76.4	1771	280	33	183	1873	3238252	3236540	0	1285	2	S
s_1_1_contig186001	gi|224381666|ref|NC_011462.1chromosome1	76.92	546	91	9	1	522	3238391	3238925	4e-112	408	1	S
s_1_1_contig28171	gi|224381666|ref|NC_011462.1chromosome1	76.38	906	169	17	2	886	3239810	3238929	1e-179	634	1	S
s_1_1_contig1871	gi|224381666|ref|NC_011462.1chromosome1	69.51	305	73	7	203	494	3240365	3240662	1e-24	118	22	M
s_1_1_contig14710	gi|224381666|ref|NC_011462.1chromosome1	73.83	1907	376	41	5028	6917	3245670	3247470	0	1115	7	M
s_1_1_contig276231	gi|224381666|ref|NC_011462.1chromosome1	74.49	345	70	5	50	381	3260513	3260174	8e-55	219	1	S
s_1_1_contig162397	gi|224381666|ref|NC_011462.1chromosome1	71.5	1049	178	23	3187	4152	3263145	3264155	2e-153	549	553	M
s_1_1_contig163871	gi|224381666|ref|NC_011462.1chromosome1	74.03	1086	208	23	848	1909	3267292	3266257	0	650	3	S
s_1_1_contig17385	gi|224381666|ref|NC_011462.1chromosome1	69.8	255	48	14	132	365	3267892	3268138	7e-12	77	33	M
s_1_1_contig101529	gi|224381666|ref|NC_011462.1chromosome1	73.33	1136	193	24	7760	8857	3271355	3270292	0	673	3	S
s_1_1_contig205656	gi|224381666|ref|NC_011462.1chromosome1	69.37	751	145	22	95	803	3275615	3274908	2e-77	295	1	S
s_1_1_contig83771	gi|224381666|ref|NC_011462.1chromosome1	68.97	1115	234	22	2950	4010	3288517	3287461	2e-124	453	2	S
s_1_1_contig94818	gi|224381666|ref|NC_011462.1chromosome1	74.11	1236	231	27	2263	3460	3293607	3294791	0	746	3	S
s_1_1_contig265737	gi|224381666|ref|NC_011462.1chromosome1	76.9	606	106	7	323	895	3296066	3295462	2e-127	461	1	S
s_1_1_contig81807	gi|224381666|ref|NC_011462.1chromosome1	70.26	2236	454	46	1693	3889	3299463	3297400	0	1018	2	S
s_1_1_contig101992	gi|224381666|ref|NC_011462.1chromosome1	69.32	1320	195	27	1490	2735	3301135	3302318	2e-175	623	8	S
s_1_1_contig258699	gi|224381666|ref|NC_011462.1chromosome1	68.57	684	121	19	13	636	3309489	3310138	1e-68	264	1	S
s_1_1_contig40814	gi|224381666|ref|NC_011462.1chromosome1	76.81	565	74	13	1	555	3310717	3311234	7e-116	421	1	S
s_1_1_contig79346	gi|224381666|ref|NC_011462.1chromosome1	71.28	2079	423	50	2175	4223	3316703	3314769	0	989	6	S
s_1_1_contig67790	gi|224381666|ref|NC_011462.1chromosome1	70.86	1630	314	40	17	1616	3318247	3319745	0	764	10	S
s_1_1_contig61292	gi|224381666|ref|NC_011462.1chromosome1	69.43	2208	484	45	5847	7943	3336391	3334264	0	908	5	S
s_1_1_contig182316	gi|224381666|ref|NC_011462.1chromosome1	72.46	1042	212	25	1507	2533	3333313	3334294	5e-151	540	3	S
s_1_1_contig229080	gi|224381666|ref|NC_011462.1chromosome1	86.49	37	5	0	467	503	3336809	3336773	0.064	45	85	M
s_1_1_contig59648	gi|224381666|ref|NC_011462.1chromosome1	81.97	638	91	8	448	1075	3348731	3348108	1e-174	618	1	S
s_1_1_contig52472	gi|224381666|ref|NC_011462.1chromosome1	76.9	736	125	11	1608	2313	3355537	3354817	3e-154	553	51	M
s_1_1_contig158436	gi|224381666|ref|NC_011462.1chromosome1	70.3	1929	387	47	1574	3449	3360405	3362200	0	852	2	S
s_1_1_contig59866	gi|224381666|ref|NC_011462.1chromosome1	69.39	2084	395	37	2	2009	3362754	3364670	0	935	60	M
s_1_1_contig148421	gi|224381666|ref|NC_011462.1chromosome1	71.84	1573	304	41	836	2354	3369887	3371374	0	780	1	S
s_1_1_contig171403	gi|224381666|ref|NC_011462.1chromosome1	71.15	908	180	22	20	905	3375525	3374678	2e-118	432	1	S
s_1_1_contig124558	gi|224381666|ref|NC_011462.1chromosome1	72.61	2344	384	57	1938	4219	3378271	3380418	0	1308	2	S
s_1_1_contig16696	gi|224381666|ref|NC_011462.1chromosome1	73.63	694	126	18	17	697	3381179	3380530	1e-108	398	1	S
s_1_1_contig32368	gi|224381666|ref|NC_011462.1chromosome1	72.79	735	143	14	21	741	3382626	3381935	8e-113	412	1	S
s_1_1_contig162084	gi|224381666|ref|NC_011462.1chromosome1	73.32	2230	372	51	4210	6383	3384725	3382663	0	1310	4	S
s_1_1_contig65149	gi|224381666|ref|NC_011462.1chromosome1	76.17	3886	605	79	6476	10197	3396342	3392614	0	2767	13	M
s_1_1_contig153287	gi|224381666|ref|NC_011462.1chromosome1	96.3	27	1	0	910	936	3404057	3404083	0.037	45	35	M
s_1_1_contig277254	gi|224381666|ref|NC_011462.1chromosome1	74.9	263	54	4	1	251	3405769	3405507	3e-40	170	156	M
s_1_1_contig83160	gi|224381666|ref|NC_011462.1chromosome1	80.17	121	22	2	4327	4446	3405657	3405776	2e-19	104	3034	M
s_1_1_contig259166	gi|224381666|ref|NC_011462.1chromosome1	86.21	58	8	0	234	291	3413559	3413502	5e-10	70	223	M
s_1_1_contig56317	gi|224381666|ref|NC_011462.1chromosome1	76.44	7398	1107	138	5900	13108	3431042	3424092	0	5434	7	S
s_1_1_contig205139	gi|224381666|ref|NC_011462.1chromosome1	78.37	943	133	24	108	1003	3438073	3437155	0	737	1	S
s_1_1_contig227738	gi|224381666|ref|NC_011462.1chromosome1	82.66	271	47	0	135	405	3439875	3440145	2e-72	277	1	S
s_1_1_contig261674	gi|224381666|ref|NC_011462.1chromosome1	74.33	931	137	24	2210	3086	3442890	3443772	2e-164	585	3	S
s_1_1_contig74259	gi|224381666|ref|NC_011462.1chromosome1	71.07	3280	585	62	5667	8762	3460404	3463503	0	1685	10	S
s_1_1_contig81130	gi|224381666|ref|NC_011462.1chromosome1	74.65	3740	640	95	9409	13031	3477086	3473538	0	2320	22	M
s_1_1_contig53338	gi|224381666|ref|NC_011462.1chromosome1	90	50	5	0	1	50	3484871	3484920	5e-08	68	1238	M
s_1_1_contig253130	gi|224381666|ref|NC_011462.1chromosome1	74.06	374	71	9	271	629	3489321	3488959	2e-55	221	1	S
s_1_1_contig241661	gi|224381666|ref|NC_011462.1chromosome1	75.18	826	139	17	323	1125	3489377	3490159	8e-154	549	1	S
s_1_1_contig69566	gi|224381666|ref|NC_011462.1chromosome1	77.13	3573	577	63	23	3473	3490924	3494378	0	2693	4	S
s_1_1_contig263980	gi|224381666|ref|NC_011462.1chromosome1	73.99	2003	346	42	4470	6423	3502519	3500643	0	1232	5	S
s_1_1_contig205704	gi|224381666|ref|NC_011462.1chromosome1	96	25	1	0	439	463	3509633	3509609	0.27	41	14	M
s_1_1_contig105160	gi|224381666|ref|NC_011462.1chromosome1	72.47	3462	586	78	3167	6528	3509810	3513004	0	1927	3	S
s_1_1_contig259888	gi|224381666|ref|NC_011462.1chromosome1	78.99	338	54	5	658	980	3513399	3513064	9e-74	282	1	S
s_1_1_contig96257	gi|224381666|ref|NC_011462.1chromosome1	74.52	3073	520	65	5304	8275	3521417	3518507	0	1956	10	M
s_1_1_contig57334	gi|224381666|ref|NC_011462.1chromosome1	73.51	5429	976	119	188	5434	3534754	3539902	0	3187	24	S
s_1_1_contig129553	gi|224381666|ref|NC_011462.1chromosome1	90.62	32	3	0	245	276	3548717	3548748	0.15	45	50	M
s_1_1_contig152978	gi|224381666|ref|NC_011462.1chromosome1	68.72	179	32	4	1526	1704	3560144	3560298	5e-11	75	385	M
s_1_1_contig197150	gi|224381666|ref|NC_011462.1chromosome1	85.71	42	4	1	655	694	3569251	3569292	0.009	46	35	M
s_1_1_contig223178	gi|224381666|ref|NC_011462.1chromosome1	81.91	94	15	2	2051	2143	3581504	3581412	3e-14	86	893	M
s_1_1_contig48900	gi|224381666|ref|NC_011462.1chromosome1	78.04	419	59	13	56	468	3585767	3586158	3e-83	313	2	S
s_1_1_contig61289	gi|224381666|ref|NC_011462.1chromosome1	80.82	9520	1232	137	2424	11636	3595499	3586267	0	8854	4	S
s_1_1_contig125551	gi|224381666|ref|NC_011462.1chromosome1	70	1210	213	29	741	1916	3599263	3600356	3e-154	551	1	S
s_1_1_contig21767	gi|224381666|ref|NC_011462.1chromosome1	69.14	982	210	31	323	1266	3602794	3601868	2e-93	349	1	S
s_1_1_contig264673	gi|224381666|ref|NC_011462.1chromosome1	73.24	411	67	16	606	1003	3604609	3604989	2e-52	212	1	S
s_1_1_contig54756	gi|224381666|ref|NC_011462.1chromosome1	75.44	3876	655	72	8156	11882	3618420	3622147	0	2641	9	S
s_1_1_contig88643	gi|224381666|ref|NC_011462.1chromosome1	70.06	1697	311	42	2528	4184	3634167	3635706	0	758	11	S
s_1_1_contig70653	gi|224381666|ref|NC_011462.1chromosome1	72.53	3735	654	67	7067	10578	3651659	3655244	0	2143	28	M
s_1_1_contig227580	gi|224381666|ref|NC_011462.1chromosome1	85.15	101	12	2	498	597	3681003	3680905	7e-22	109	10092	M
s_1_1_contig276255	gi|224381666|ref|NC_011462.1chromosome1	82.93	82	12	2	1011	1090	3681012	3680931	2e-12	79	1186	M
s_1_1_contig181450	gi|224381666|ref|NC_011462.1chromosome1	75.21	117	23	4	1209	1322	3685307	3685194	4e-09	68	89	M
s_1_1_contig172213	gi|224381666|ref|NC_011462.1chromosome1	75.14	1424	257	25	455	1844	3686698	3685338	0	948	2	S
s_1_1_contig108081	gi|224381666|ref|NC_011462.1chromosome1	70.76	2804	523	48	1177	3930	3694588	3692032	0	1411	27	M
s_1_1_contig231326	gi|224381666|ref|NC_011462.1chromosome1	92.65	68	5	0	1403	1470	3695735	3695668	1e-18	100	16076	M
s_1_1_contig108589	gi|224381666|ref|NC_011462.1chromosome1	73.63	3401	613	56	4827	8083	3705106	3701846	0	2093	59	M
s_1_1_contig97246	gi|224381666|ref|NC_011462.1chromosome1	74.4	754	138	16	2993	3723	3715834	3716555	4e-129	468	3	S
s_1_1_contig89888	gi|224381666|ref|NC_011462.1chromosome1	72.03	1895	337	45	994	2834	3719430	3721185	0	1000	40	M
s_1_1_contig17168	gi|224381666|ref|NC_011462.1chromosome1	71.47	687	135	20	1560	2230	3736238	3736879	8e-85	320	3	S
s_1_1_contig135498	gi|224381666|ref|NC_011462.1chromosome1	73.1	1275	284	24	724	1976	3743597	3742360	0	699	4	S
s_1_1_contig171135	gi|224381666|ref|NC_011462.1chromosome1	69.87	541	118	11	507	1027	3746731	3746216	1e-58	232	1	S
s_1_1_contig188009	gi|224381666|ref|NC_011462.1chromosome1	71.75	676	157	13	29	700	3745685	3746330	1e-88	331	1	S
s_1_1_contig36315	gi|224381666|ref|NC_011462.1chromosome1	62.34	640	149	18	650	1258	3747844	3748422	1e-09	70	69	M
s_1_1_contig137349	gi|224381666|ref|NC_011462.1chromosome1	77.3	1797	341	30	43	1820	3752667	3750919	0	1326	2	S
s_1_1_contig83381	gi|224381666|ref|NC_011462.1chromosome1	72.62	1399	280	31	1641	2986	3755098	3753750	0	749	3	S
s_1_1_contig195175	gi|224381666|ref|NC_011462.1chromosome1	76.09	343	59	8	878	1218	3756970	3757291	5e-59	233	1	S
s_1_1_contig112177	gi|224381666|ref|NC_011462.1chromosome1	71.12	1115	197	28	6412	7449	3765779	3766845	4e-152	545	463	M
s_1_1_contig252131	gi|224381666|ref|NC_011462.1chromosome1	82.72	81	8	2	69	149	3766870	3766944	2e-13	81	3516	M
s_1_1_contig93118	gi|224381666|ref|NC_011462.1chromosome1	76.19	882	150	12	1241	2074	3768067	3768936	0	645	19	M
s_1_1_contig151649	gi|224381666|ref|NC_011462.1chromosome1	81.82	143	25	1	2496	2637	3769840	3769698	7e-30	138	11	M
s_1_1_contig184471	gi|224381666|ref|NC_011462.1chromosome1	87.88	99	12	0	3	101	3769799	3769701	8e-27	125	1	S
s_1_1_contig249319	gi|224381666|ref|NC_011462.1chromosome1	82.41	108	18	1	983	1089	3769695	3769802	1e-20	105	3234	M
s_1_1_contig174195	gi|224381666|ref|NC_011462.1chromosome1	88.42	95	10	1	1317	1410	3769709	3769803	3e-24	118	11226	M
s_1_1_contig188368	gi|224381666|ref|NC_011462.1chromosome1	84.55	110	17	0	10378	10487	3769697	3769806	2e-24	122	10764	M
s_1_1_contig74812	gi|224381666|ref|NC_011462.1chromosome1	82.94	211	35	1	3459	3669	3769705	3769914	7e-53	215	3	M
s_1_1_contig134508	gi|224381666|ref|NC_011462.1chromosome1	72.96	466	97	8	1658	2123	3775828	3776264	2e-67	262	4	S
s_1_1_contig2983	gi|224381666|ref|NC_011462.1chromosome1	79.73	148	6	4	314	461	3785443	3785320	4e-30	136	1	S
s_1_1_contig2982	gi|224381666|ref|NC_011462.1chromosome1	79.73	148	6	4	105	252	3785320	3785443	4e-30	136	1	S
s_1_1_contig54121	gi|224381666|ref|NC_011462.1chromosome1	73.42	3329	561	69	6209	9404	3792034	3795171	0	1995	7	S
s_1_1_contig10497	gi|224381666|ref|NC_011462.1chromosome1	75.42	1770	306	38	2867	4578	3804220	3802522	0	1177	2	S
s_1_1_contig224156	gi|224381666|ref|NC_011462.1chromosome1	85.71	84	12	0	3	86	3805522	3805439	3e-18	99	6151	M
s_1_1_contig242811	gi|224381666|ref|NC_011462.1chromosome1	85	80	7	1	1	75	3805579	3805500	2e-16	92	7881	M
s_1_1_contig276357	gi|224381666|ref|NC_011462.1chromosome1	86.13	137	19	0	862	998	3805443	3805579	2e-37	161	300	M
s_1_1_contig272770	gi|224381666|ref|NC_011462.1chromosome1	71.5	614	145	12	1	598	3807814	3807215	1e-76	291	1	S
s_1_1_contig128989	gi|224381666|ref|NC_011462.1chromosome1	76.96	1137	166	19	7694	8762	3810021	3808913	0	870	8	S
s_1_1_contig270564	gi|224381666|ref|NC_011462.1chromosome1	67.69	978	192	28	224	1108	3820359	3821305	1e-86	325	1	S
s_1_1_contig98667	gi|224381666|ref|NC_011462.1chromosome1	76.56	1800	306	37	168	1909	3824854	3823113	0	1281	3	S
s_1_1_contig89794	gi|224381666|ref|NC_011462.1chromosome1	77.29	5482	863	100	8192	13536	3839546	3844782	0	4167	12	S
s_1_1_contig66901	gi|224381666|ref|NC_011462.1chromosome1	71.46	4569	883	102	17336	21707	3862594	3866938	0	2280	92	M
s_1_1_contig107363	gi|224381666|ref|NC_011462.1chromosome1	75.16	1103	203	19	7156	8240	3884299	3885348	0	733	9	S
s_1_1_contig155614	gi|224381666|ref|NC_011462.1chromosome1	85.87	92	12	1	1	91	3888249	3888340	1e-19	104	6007	M
s_1_1_contig127370	gi|224381666|ref|NC_011462.1chromosome1	75.34	2109	385	32	3153	5185	3891698	3889649	0	1436	9	S
s_1_1_contig117177	gi|224381666|ref|NC_011462.1chromosome1	77.79	1819	310	32	1557	3339	3905424	3903664	0	1400	4	S
s_1_1_contig191057	gi|224381666|ref|NC_011462.1chromosome1	71.91	744	155	20	124	842	3907459	3906745	1e-96	358	41	M
s_1_1_contig236169	gi|224381666|ref|NC_011462.1chromosome1	90.91	66	6	0	214	279	3907293	3907228	2e-16	93	34182	M
s_1_1_contig40097	gi|224381666|ref|NC_011462.1chromosome1	84.68	111	17	0	717	827	3907355	3907245	4e-26	123	1	S
s_1_1_contig247923	gi|224381666|ref|NC_011462.1chromosome1	83.95	81	12	1	578	657	3907226	3907306	3e-14	84	1840	M
s_1_1_contig176096	gi|224381666|ref|NC_011462.1chromosome1	89.53	86	9	0	764	849	3907229	3907314	2e-23	114	22710	M
s_1_1_contig240557	gi|224381666|ref|NC_011462.1chromosome1	70.4	1510	297	32	8	1479	3907498	3908895	0	699	1	S
s_1_1_contig133095	gi|224381666|ref|NC_011462.1chromosome1	71.18	1530	305	33	1016	2514	3912356	3910932	0	746	5	S
s_1_1_contig267695	gi|224381666|ref|NC_011462.1chromosome1	69.24	699	146	10	5	692	3918836	3919476	6e-82	309	2	S
s_1_1_contig82865	gi|224381666|ref|NC_011462.1chromosome1	74.54	2231	412	40	922	3096	3920421	3922551	0	1424	6	S
s_1_1_contig103669	gi|224381666|ref|NC_011462.1chromosome1	75.95	1771	303	32	2759	4471	3930347	3932052	0	1240	3	S
s_1_1_contig198752	gi|224381666|ref|NC_011462.1chromosome1	75.34	1456	234	24	535	1936	3932313	3933697	0	1012	1	S
s_1_1_contig99216	gi|224381666|ref|NC_011462.1chromosome1	70.62	2597	504	65	1	2470	3947233	3944769	0	1184	3	S
s_1_1_contig82929	gi|224381666|ref|NC_011462.1chromosome1	75.29	2153	381	39	2129	4237	3949355	3951400	0	1445	4	S
s_1_1_contig177043	gi|224381666|ref|NC_011462.1chromosome1	69.47	2126	395	55	766	2766	3956620	3954624	0	890	2	S
s_1_1_contig181346	gi|224381666|ref|NC_011462.1chromosome1	75.91	1615	250	31	20	1557	3959327	3960879	0	1144	2	S
s_1_1_contig3440	gi|224381666|ref|NC_011462.1chromosome1	72.78	1396	272	30	6	1360	3967853	3966525	0	767	2	S
s_1_1_contig15169	gi|224381666|ref|NC_011462.1chromosome1	71.88	2642	504	52	34	2572	3970966	3968461	0	1397	1	S
s_1_1_contig50706	gi|224381666|ref|NC_011462.1chromosome1	71.13	3713	670	91	1566	5095	3972287	3975780	0	1815	2	S
s_1_1_contig223519	gi|224381666|ref|NC_011462.1chromosome1	77.68	466	79	10	5	456	3976266	3975812	4e-94	349	1	S
s_1_1_contig193126	gi|224381666|ref|NC_011462.1chromosome1	70.34	2026	397	40	82	2010	3978172	3976254	0	948	1	S
s_1_1_contig258705	gi|224381666|ref|NC_011462.1chromosome1	91.18	34	3	0	440	473	3976332	3976365	0.002	48	135	M
s_1_1_contig148994	gi|224381666|ref|NC_011462.1chromosome1	75.41	427	78	8	795	1217	3979286	3979689	1e-74	286	2	S
s_1_1_contig137440	gi|224381666|ref|NC_011462.1chromosome1	70.41	4411	806	114	1	4218	3983950	3979846	0	2008	1	S
s_1_1_contig78524	gi|224381666|ref|NC_011462.1chromosome1	73.98	2929	564	60	5681	8527	3988030	3985218	0	1755	50	M
s_1_1_contig182794	gi|224381666|ref|NC_011462.1chromosome1	83.48	115	16	2	1247	1359	3990151	3990264	1e-23	116	16337	M
s_1_1_contig29491	gi|224381666|ref|NC_011462.1chromosome1	83.33	48	6	1	1063	1110	3991831	3991786	0.004	48	77	M
s_1_1_contig167971	gi|224381666|ref|NC_011462.1chromosome1	73.76	1067	192	16	1941	2971	3994545	3995559	0	670	2	S
s_1_1_contig273779	gi|224381666|ref|NC_011462.1chromosome1	68.22	516	121	13	5	490	3996397	3995895	2e-40	172	1	S
s_1_1_contig272026	gi|224381666|ref|NC_011462.1chromosome1	70.87	714	125	13	3	673	3997056	3996383	2e-99	367	1	S
s_1_1_contig52628	gi|224381666|ref|NC_011462.1chromosome1	72.82	2885	505	72	1	2835	3997047	3999702	0	1595	137	M
s_1_1_contig19197	gi|224381666|ref|NC_011462.1chromosome1	76.61	1261	161	24	17	1256	4011652	4012799	0	957	1	S
s_1_1_contig16346	gi|224381666|ref|NC_011462.1chromosome1	70.59	1673	305	39	220	1855	4013236	4014758	0	792	1	S
s_1_1_contig81612	gi|224381666|ref|NC_011462.1chromosome1	73.78	2418	467	41	2984	5357	4021643	4019349	0	1469	5	S
s_1_1_contig37403	gi|224381666|ref|NC_011462.1chromosome1	78.46	65	14	0	44	108	4024644	4024580	1e-05	55	44	M
s_1_1_contig114039	gi|224381666|ref|NC_011462.1chromosome1	71.69	2836	443	64	2197	4939	4030841	4028273	0	1530	5	S
s_1_1_contig71089	gi|224381666|ref|NC_011462.1chromosome1	72.88	5040	897	97	12603	17462	4042466	4037717	0	2913	83	M
s_1_1_contig248430	gi|224381666|ref|NC_011462.1chromosome1	87.95	83	8	2	84	165	4061292	4061211	2e-18	99	4418	M
s_1_1_contig51788	gi|224381666|ref|NC_011462.1chromosome1	71.83	3844	691	95	7499	11240	4065961	4069514	0	1975	4	S
s_1_1_contig76494	gi|224381666|ref|NC_011462.1chromosome1	73.7	3068	552	78	4160	7129	4088542	4085632	0	1773	10	S
s_1_1_contig248476	gi|224381666|ref|NC_011462.1chromosome1	78.15	151	27	3	75	220	4091980	4091831	4e-24	116	4095	M
s_1_1_contig114169	gi|224381666|ref|NC_011462.1chromosome1	72.03	1963	364	43	4750	6650	4096649	4098488	0	1038	17	M
s_1_1_contig181980	gi|224381666|ref|NC_011462.1chromosome1	76.78	2597	433	45	59	2583	4103795	4106293	0	1916	2	S
s_1_1_contig210526	gi|224381666|ref|NC_011462.1chromosome1	72.31	1730	310	46	1618	3297	4107779	4109389	0	906	3	M
s_1_1_contig101801	gi|224381666|ref|NC_011462.1chromosome1	80.3	198	36	2	4	200	4124503	4124308	9e-41	176	807	M
s_1_1_contig184643	gi|224381666|ref|NC_011462.1chromosome1	77.26	321	51	5	608	907	4124643	4124324	2e-63	248	23	M
s_1_1_contig188422	gi|224381666|ref|NC_011462.1chromosome1	81.71	164	26	2	3	165	4124498	4124338	7e-36	156	71	M
s_1_1_contig256857	gi|224381666|ref|NC_011462.1chromosome1	75.5	151	36	1	263	413	4124500	4124351	1e-19	102	833	M
s_1_1_contig278895	gi|224381666|ref|NC_011462.1chromosome1	81.02	137	24	2	848	983	4124327	4124462	5e-26	123	1	S
s_1_1_contig184911	gi|224381666|ref|NC_011462.1chromosome1	82.58	132	22	1	1106	1236	4124336	4124467	4e-28	131	3	M
s_1_1_contig95454	gi|224381666|ref|NC_011462.1chromosome1	78.52	149	21	5	8346	8484	4124326	4124473	8e-22	113	6448	M
s_1_1_contig256190	gi|224381666|ref|NC_011462.1chromosome1	80.77	156	29	1	350	504	4124327	4124482	3e-32	143	38	M
s_1_1_contig275506	gi|224381666|ref|NC_011462.1chromosome1	81.05	95	18	0	521	615	4124390	4124484	2e-16	92	4952	M
s_1_1_contig238937	gi|224381666|ref|NC_011462.1chromosome1	80.56	144	19	2	990	1125	4124352	4124494	1e-28	132	1	S
s_1_1_contig226077	gi|224381666|ref|NC_011462.1chromosome1	82.05	156	28	0	1123	1278	4124347	4124502	1e-35	156	196	M
s_1_1_contig279646	gi|224381666|ref|NC_011462.1chromosome1	78.43	204	30	3	470	660	4124301	4124503	9e-40	168	428	M
s_1_1_contig81891	gi|224381666|ref|NC_011462.1chromosome1	82.35	170	29	1	3427	3595	4124348	4124517	5e-39	168	1683	M
s_1_1_contig54668	gi|224381666|ref|NC_011462.1chromosome1	77.19	5471	859	90	855	6168	4131181	4125943	0	4185	7	S
s_1_1_contig154770	gi|224381666|ref|NC_011462.1chromosome1	65.83	1349	251	39	536	1830	4134062	4132870	2e-99	369	3	S
s_1_1_contig227958	gi|224381666|ref|NC_011462.1chromosome1	75.1	1462	278	36	29	1457	4134542	4135950	0	911	2	S
s_1_1_contig59888	gi|224381666|ref|NC_011462.1chromosome1	72.98	2446	447	60	1256	3565	4136740	4139107	0	1353	2	S
s_1_1_contig17161	gi|224381666|ref|NC_011462.1chromosome1	70.75	2913	506	65	23	2807	4139145	4141839	0	1431	2	S
s_1_1_contig101120	gi|224381666|ref|NC_011462.1chromosome1	75.35	2917	496	60	6701	9505	4144737	4141932	0	1950	10	S
s_1_1_contig267543	gi|224381666|ref|NC_011462.1chromosome1	100	26	0	0	448	473	4147183	4147158	0.002	48	28	M
s_1_1_contig157663	gi|224381666|ref|NC_011462.1chromosome1	69.82	2001	382	35	4271	6157	4152916	4151024	0	928	3	S
s_1_1_contig227607	gi|224381666|ref|NC_011462.1chromosome1	76.08	878	151	20	124	974	4155892	4156737	2e-169	600	1	S
s_1_1_contig195399	gi|224381666|ref|NC_011462.1chromosome1	72.07	1572	313	29	4	1505	4160770	4159255	0	839	3	S
s_1_1_contig194824	gi|224381666|ref|NC_011462.1chromosome1	75.22	1606	270	39	1117	2658	4162321	4163862	0	1041	3	S
s_1_1_contig175534	gi|224381666|ref|NC_011462.1chromosome1	83.72	43	7	0	142	184	4168231	4168189	0.018	46	163	M
s_1_1_contig17330	gi|224381666|ref|NC_011462.1chromosome1	78.03	4933	703	71	15	4716	4164005	4168787	0	4033	2	S
s_1_1_contig96743	gi|224381666|ref|NC_011462.1chromosome1	75.34	1938	332	44	11324	13191	4172006	4170145	0	1274	7	S
s_1_1_contig66467	gi|224381666|ref|NC_011462.1chromosome1	73.09	5663	972	116	26544	32033	4206121	4200838	0	3317	2109	M
s_1_1_contig102255	gi|224381666|ref|NC_011462.1chromosome1	71.4	3025	546	57	14076	16998	4240765	4237958	0	1586	14	S
s_1_1_contig263133	gi|224381666|ref|NC_011462.1chromosome1	79.55	88	15	1	6	90	4241460	4241547	8e-12	77	101	M
s_1_1_contig209041	gi|224381666|ref|NC_011462.1chromosome1	78.07	114	25	0	20	133	4255002	4254889	4e-17	93	58	M
s_1_1_contig243944	gi|224381666|ref|NC_011462.1chromosome1	76.04	288	59	6	1716	2002	4255285	4255007	8e-46	190	33	M
s_1_1_contig119258	gi|224381666|ref|NC_011462.1chromosome1	71.82	2214	380	57	125	2282	4265052	4263027	0	1142	646	M
s_1_1_contig27569	gi|224381666|ref|NC_011462.1chromosome1	74.15	1443	185	41	29	1368	4265200	4266557	0	906	1	S
s_1_1_contig218290	gi|224381666|ref|NC_011462.1chromosome1	71.96	2468	471	51	1625	4036	4267581	4269883	0	1301	3	S
s_1_1_contig44594	gi|224381666|ref|NC_011462.1chromosome1	67.45	553	105	17	15	539	4271521	4271016	1e-42	178	50	M
s_1_1_contig53958	gi|224381666|ref|NC_011462.1chromosome1	80.78	5099	608	106	4099	9070	4276508	4271655	0	4635	3	S
s_1_1_contig148471	gi|224381666|ref|NC_011462.1chromosome1	89.47	38	0	1	4	37	4281648	4281611	0.001	50	176	M
s_1_1_contig187636	gi|224381666|ref|NC_011462.1chromosome1	88.64	88	8	2	447	533	4293325	4293239	2e-21	107	14483	M
s_1_1_contig243842	gi|224381666|ref|NC_011462.1chromosome1	82.35	51	8	1	104	154	4301515	4301466	0.002	48	38	M
s_1_1_contig78799	gi|224381666|ref|NC_011462.1chromosome1	69.5	4174	792	100	13725	17704	4299325	4303211	0	1772	11	S
s_1_1_contig158605	gi|224381666|ref|NC_011462.1chromosome1	75.85	2878	424	52	2682	5428	4309607	4306870	0	2067	4	S
s_1_1_contig203865	gi|224381666|ref|NC_011462.1chromosome1	75.79	756	134	16	1249	1975	4313000	4312265	2e-142	511	1	S
s_1_1_contig110008	gi|224381666|ref|NC_011462.1chromosome1	71.87	2716	488	56	6600	9207	4318186	4315639	0	1451	5	S
s_1_1_contig239409	gi|224381666|ref|NC_011462.1chromosome1	70.95	888	150	30	51	901	4324818	4325634	2e-109	401	441	M
s_1_1_contig226143	gi|224381666|ref|NC_011462.1chromosome1	78.99	257	48	4	2865	3116	4335676	4335421	5e-51	208	2	S
s_1_1_contig272366	gi|224381666|ref|NC_011462.1chromosome1	85.11	94	12	2	2038	2131	4335521	4335430	1e-18	100	1006	M
s_1_1_contig68592	gi|224381666|ref|NC_011462.1chromosome1	78.41	1677	262	21	5	1671	4347396	4345810	0	1388	277	M
s_1_1_contig71293	gi|224381666|ref|NC_011462.1chromosome1	73.2	3467	669	74	21937	25320	4354643	4351354	0	1965	15	S
s_1_1_contig253633	gi|224381666|ref|NC_011462.1chromosome1	93.94	33	2	0	281	313	4356135	4356103	0.0002	52	443	M
s_1_1_contig186122	gi|224381666|ref|NC_011462.1chromosome1	93.1	29	2	0	866	894	4362311	4362339	0.045	45	54	M
s_1_1_contig203402	gi|224381666|ref|NC_011462.1chromosome1	81.82	55	9	1	43	97	4385723	4385670	0.0004	52	91	M
s_1_1_contig80906	gi|224381666|ref|NC_011462.1chromosome1	74.36	7191	1237	136	4264	11215	4386354	4393176	0	4589	4	S
s_1_1_contig67442	gi|224381666|ref|NC_011462.1chromosome1	71.07	3927	642	94	10764	14598	4408807	4412331	0	1983	14	S
s_1_1_contig222029	gi|224381666|ref|NC_011462.1chromosome1	70.83	1080	214	30	395	1468	4417740	4416756	2e-134	484	1	S
s_1_1_contig64627	gi|224381666|ref|NC_011462.1chromosome1	74.77	7048	1214	145	19031	25871	4425088	4418398	0	4549	13	S
s_1_1_contig172345	gi|224381666|ref|NC_011462.1chromosome1	87.84	74	9	0	724	797	4431046	4430973	7e-17	93	4969	M
s_1_1_contig243715	gi|224381666|ref|NC_011462.1chromosome1	93.1	29	2	0	287	315	4454021	4453993	0.023	45	38	M
s_1_1_contig143427	gi|224381666|ref|NC_011462.1chromosome1	83.72	43	7	0	1049	1091	4456414	4456372	0.031	46	47	M
s_1_1_contig92999	gi|224381666|ref|NC_011462.1chromosome1	74.17	7877	1344	172	1841	9414	4451575	4459063	0	4879	6	S
s_1_1_contig87474	gi|224381666|ref|NC_011462.1chromosome1	80.5	13348	1768	186	945	13944	4484670	4471810	0	12250	3	S
s_1_1_contig82385	gi|224381666|ref|NC_011462.1chromosome1	78.04	3916	660	49	5826	9667	4492079	4495868	0	3144	10	S
s_1_1_contig264429	gi|224381666|ref|NC_011462.1chromosome1	81.82	55	7	2	1391	1443	4497087	4497140	0.006	48	32	M
s_1_1_contig182354	gi|224381666|ref|NC_011462.1chromosome1	74.47	94	21	1	515	608	4500144	4500054	7e-07	61	139	M
s_1_1_contig97349	gi|224381666|ref|NC_011462.1chromosome1	73.42	2445	467	48	618	3004	4507587	4509906	0	1427	3	S
s_1_1_contig103422	gi|224381666|ref|NC_011462.1chromosome1	78.78	1004	175	9	1170	2167	4515549	4514578	0	845	6	S
s_1_1_contig77698	gi|224381666|ref|NC_011462.1chromosome1	91.89	37	3	0	3880	3916	4514911	4514875	0.0005	54	45	M
s_1_1_contig258858	gi|224381666|ref|NC_011462.1chromosome1	80.35	229	40	5	358	584	4517001	4516776	7e-47	192	818	M
s_1_1_contig258183	gi|224381666|ref|NC_011462.1chromosome1	80.45	179	31	4	1	177	4516977	4516801	1e-34	150	50	M
s_1_1_contig42894	gi|224381666|ref|NC_011462.1chromosome1	76.11	180	26	5	419	583	4516994	4516817	3e-26	123	1	S
s_1_1_contig214517	gi|224381666|ref|NC_011462.1chromosome1	78.84	189	36	4	594	780	4517004	4516818	3e-33	147	81	M
s_1_1_contig146554	gi|224381666|ref|NC_011462.1chromosome1	83.78	111	16	2	5473	5582	4516953	4516844	7e-22	113	17387	M
s_1_1_contig198396	gi|224381666|ref|NC_011462.1chromosome1	80.62	160	30	1	128	286	4517004	4516845	2e-32	145	102	M
s_1_1_contig250849	gi|224381666|ref|NC_011462.1chromosome1	79.01	162	33	1	485	645	4517007	4516846	5e-30	136	5	M
s_1_1_contig199174	gi|224381666|ref|NC_011462.1chromosome1	80.69	145	26	2	158	301	4517000	4516857	1e-27	129	7	M
s_1_1_contig233134	gi|224381666|ref|NC_011462.1chromosome1	82.31	147	25	1	618	763	4517004	4516858	1e-32	145	23	M
s_1_1_contig277654	gi|224381666|ref|NC_011462.1chromosome1	82.44	131	19	4	517	644	4516996	4516867	1e-24	118	6116	M
s_1_1_contig281607	gi|224381666|ref|NC_011462.1chromosome1	77	100	23	0	725	824	4516966	4516867	5e-12	77	1487	M
s_1_1_contig220373	gi|224381666|ref|NC_011462.1chromosome1	83.45	139	18	3	708	843	4517004	4516868	2e-30	138	4	M
s_1_1_contig258516	gi|224381666|ref|NC_011462.1chromosome1	82.35	136	21	3	412	545	4517002	4516868	2e-27	127	4	M
s_1_1_contig52329	gi|224381666|ref|NC_011462.1chromosome1	82.22	90	16	0	5307	5396	4516957	4516868	2e-15	92	9057	M
s_1_1_contig162895	gi|224381666|ref|NC_011462.1chromosome1	80.6	134	22	4	1344	1475	4516999	4516868	5e-22	111	8977	M
s_1_1_contig247791	gi|224381666|ref|NC_011462.1chromosome1	80	135	26	1	405	538	4517004	4516870	1e-24	118	12281	M
s_1_1_contig249856	gi|224381666|ref|NC_011462.1chromosome1	85.87	92	11	2	5	95	4516960	4516870	4e-19	100	14097	M
s_1_1_contig147990	gi|224381666|ref|NC_011462.1chromosome1	80.95	126	21	2	1747	1869	4516996	4516871	5e-22	113	5784	M
s_1_1_contig125998	gi|224381666|ref|NC_011462.1chromosome1	82.48	137	22	1	2216	2352	4517006	4516872	2e-29	136	11	M
s_1_1_contig139444	gi|224381666|ref|NC_011462.1chromosome1	79.37	126	20	3	563	683	4516996	4516872	1e-18	102	8726	M
s_1_1_contig47978	gi|224381666|ref|NC_011462.1chromosome1	80.3	132	23	3	370	500	4517005	4516876	2e-22	111	7723	M
s_1_1_contig241077	gi|224381666|ref|NC_011462.1chromosome1	81.75	126	22	1	816	940	4517004	4516879	6e-25	120	15978	M
s_1_1_contig275134	gi|224381666|ref|NC_011462.1chromosome1	84	125	17	3	537	659	4517004	4516881	9e-27	125	3	M
s_1_1_contig258933	gi|224381666|ref|NC_011462.1chromosome1	85.39	89	12	1	644	731	4516999	4516911	1e-18	99	9650	M
s_1_1_contig219916	gi|224381666|ref|NC_011462.1chromosome1	89.77	88	8	1	3700	3786	4517004	4516917	1e-22	114	13486	M
s_1_1_contig275527	gi|224381666|ref|NC_011462.1chromosome1	85.71	91	8	2	1908	1997	4517005	4516919	3e-19	102	5992	M
s_1_1_contig247511	gi|224381666|ref|NC_011462.1chromosome1	86.17	94	11	2	651	743	4516868	4516960	3e-20	104	13695	M
s_1_1_contig156643	gi|224381666|ref|NC_011462.1chromosome1	83.52	91	15	0	965	1055	4516871	4516961	8e-18	97	8547	M
s_1_1_contig282160	gi|224381666|ref|NC_011462.1chromosome1	75.95	158	27	3	248	395	4516822	4516978	1e-22	111	7976	M
s_1_1_contig148451	gi|224381666|ref|NC_011462.1chromosome1	83.85	130	18	3	5	132	4516868	4516996	2e-27	129	3	M
s_1_1_contig201102	gi|224381666|ref|NC_011462.1chromosome1	89.66	87	8	1	1	86	4516910	4516996	6e-23	113	34558	M
s_1_1_contig261858	gi|224381666|ref|NC_011462.1chromosome1	82.61	161	25	3	8485	8643	4516839	4516998	5e-34	154	76	M
s_1_1_contig4340	gi|224381666|ref|NC_011462.1chromosome1	80.15	131	24	2	1433	1561	4516868	4516998	2e-22	113	6655	M
s_1_1_contig209010	gi|224381666|ref|NC_011462.1chromosome1	84.44	135	18	3	1	133	4516869	4517002	1e-30	138	9	M
s_1_1_contig242884	gi|224381666|ref|NC_011462.1chromosome1	87.64	89	10	1	1	88	4516914	4517002	3e-21	107	7445	M
s_1_1_contig201160	gi|224381666|ref|NC_011462.1chromosome1	77.54	187	40	2	3	188	4516818	4517003	3e-31	141	18	M
s_1_1_contig51029	gi|224381666|ref|NC_011462.1chromosome1	81.16	138	21	3	11	144	4516868	4517004	9e-26	123	1	S
s_1_1_contig82731	gi|224381666|ref|NC_011462.1chromosome1	84.67	137	18	3	450	584	4516869	4517004	1e-30	141	2	M
s_1_1_contig154161	gi|224381666|ref|NC_011462.1chromosome1	78.95	190	39	1	2	190	4516815	4517004	1e-36	159	137	M
s_1_1_contig213862	gi|224381666|ref|NC_011462.1chromosome1	80.13	151	29	1	73	222	4516854	4517004	1e-29	134	11	M
s_1_1_contig246234	gi|224381666|ref|NC_011462.1chromosome1	83.59	128	20	1	1	127	4516877	4517004	9e-29	132	4	M
s_1_1_contig91582	gi|224381666|ref|NC_011462.1chromosome1	77.51	169	33	4	2	169	4516840	4517004	3e-24	120	5324	M
s_1_1_contig206967	gi|224381666|ref|NC_011462.1chromosome1	80.58	139	17	7	7	138	4516869	4517004	3e-21	107	8704	M
s_1_1_contig9698	gi|224381666|ref|NC_011462.1chromosome1	81.82	132	23	1	812	942	4516874	4517005	6e-27	127	2	S
s_1_1_contig118655	gi|224381666|ref|NC_011462.1chromosome1	79.24	236	43	6	21	253	4516774	4517006	2e-43	183	440	M
s_1_1_contig16970	gi|224381666|ref|NC_011462.1chromosome1	85.11	141	16	2	1587	1726	4516873	4517009	2e-35	156	191	M
s_1_1_contig104501	gi|224381666|ref|NC_011462.1chromosome1	81.55	168	28	2	1492	1658	4516848	4517013	9e-36	158	228	M
s_1_1_contig247340	gi|224381666|ref|NC_011462.1chromosome1	74.32	183	35	3	1	172	4516840	4517021	4e-24	116	10660	M
s_1_1_contig158913	gi|224381666|ref|NC_011462.1chromosome1	76.63	2692	439	43	2102	4735	4518923	4521482	0	1997	5	S
s_1_1_contig4255	gi|224381666|ref|NC_011462.1chromosome1	76.59	1414	250	18	4517	5906	4530248	4531604	0	1050	3	S
s_1_1_contig105987	gi|224381666|ref|NC_011462.1chromosome1	82.35	85	15	0	1326	1410	4538177	4538093	3e-14	86	3995	M
s_1_1_contig229754	gi|224381666|ref|NC_011462.1chromosome1	79.82	109	22	0	917	1025	4538087	4538195	2e-18	99	3906	M
s_1_1_contig37033	gi|224381666|ref|NC_011462.1chromosome1	90.91	33	3	0	909	941	4544082	4544114	0.01	46	70	M
s_1_1_contig182413	gi|224381666|ref|NC_011462.1chromosome1	83.87	62	8	2	875	935	4544091	4544151	5e-07	61	434	M
s_1_1_contig86202	gi|224381666|ref|NC_011462.1chromosome1	77.3	3811	628	69	13243	16965	4544274	4547935	0	2875	676	M
s_1_1_contig163002	gi|224381666|ref|NC_011462.1chromosome1	73.56	2946	545	66	113	2975	4561891	4559097	0	1714	2	S
s_1_1_contig207104	gi|224381666|ref|NC_011462.1chromosome1	75.67	1336	247	29	278	1594	4564257	4562981	0	884	74	M
s_1_1_contig34971	gi|224381666|ref|NC_011462.1chromosome1	71.9	274	61	9	134	402	4564572	4564310	2e-25	122	8368	M
s_1_1_contig255078	gi|224381666|ref|NC_011462.1chromosome1	82.61	69	12	0	1	69	4564391	4564459	2e-10	72	5423	M
s_1_1_contig246788	gi|224381666|ref|NC_011462.1chromosome1	80.58	103	18	2	46	147	4564431	4564532	9e-16	90	3283	M
s_1_1_contig38520	gi|224381666|ref|NC_011462.1chromosome1	75.7	251	55	5	69	316	4564325	4564572	1e-37	161	23	M
s_1_1_contig124937	gi|224381666|ref|NC_011462.1chromosome1	78.89	758	119	10	1113	1852	4568646	4569380	2e-180	637	178	M
s_1_1_contig129263	gi|224381666|ref|NC_011462.1chromosome1	72.23	2290	446	53	108	2290	4578621	4576415	0	1195	2	S
s_1_1_contig141000	gi|224381666|ref|NC_011462.1chromosome1	76.65	3028	482	52	24	2960	4580383	4583276	0	2242	3	S
s_1_1_contig174184	gi|224381666|ref|NC_011462.1chromosome1	84.32	555	72	4	30	578	4583551	4584096	3e-171	605	1	S
s_1_1_contig214023	gi|224381666|ref|NC_011462.1chromosome1	80.56	108	12	2	245	343	4584714	4584821	2e-19	100	1809	M
s_1_1_contig118992	gi|224381666|ref|NC_011462.1chromosome1	78.35	2083	304	37	1827	3843	4586636	4588637	0	1689	3	S
s_1_1_contig213722	gi|224381666|ref|NC_011462.1chromosome1	77.91	584	117	7	88	667	4589232	4588657	6e-125	452	1	S
s_1_1_contig68239	gi|224381666|ref|NC_011462.1chromosome1	73.82	2636	467	60	3865	6432	4590817	4593297	0	1573	2	S
s_1_1_contig92861	gi|224381666|ref|NC_011462.1chromosome1	73.46	3207	624	60	126	3242	4598767	4595698	0	1882	2	S
s_1_1_contig78173	gi|224381666|ref|NC_011462.1chromosome1	75.09	2204	388	46	3103	5250	4601580	4603678	0	1438	202	M
s_1_1_contig200105	gi|224381666|ref|NC_011462.1chromosome1	77.78	54	9	1	42	92	4609007	4609060	0.13	43	33	M
s_1_1_contig117248	gi|224381666|ref|NC_011462.1chromosome1	71.35	2614	461	60	1282	3811	4619641	4622050	0	1326	74	M
s_1_1_contig159731	gi|224381666|ref|NC_011462.1chromosome1	80.51	662	106	12	151	799	4622060	4622711	5e-163	580	2	S
s_1_1_contig198197	gi|224381666|ref|NC_011462.1chromosome1	72.95	1789	304	43	123	1873	4623784	4625430	0	1012	1	S
s_1_1_contig57303	gi|224381666|ref|NC_011462.1chromosome1	74.06	6518	1139	132	5492	11840	4640674	4634540	0	4033	9	M
s_1_1_contig257325	gi|224381666|ref|NC_011462.1chromosome1	78.88	483	91	7	1	478	4650021	4649545	2e-106	390	2	S
s_1_1_contig151078	gi|224381666|ref|NC_011462.1chromosome1	79.84	625	106	10	1971	2583	4650666	4650050	8e-149	533	139	M
s_1_1_contig225925	gi|224381666|ref|NC_011462.1chromosome1	78.42	695	120	9	831	1510	4652370	4651691	4e-158	563	2	S
s_1_1_contig120737	gi|224381666|ref|NC_011462.1chromosome1	70.57	2222	452	47	1163	3316	4656982	4654895	0	1029	1	S
s_1_1_contig234600	gi|224381666|ref|NC_011462.1chromosome1	68.43	1514	287	41	1	1436	4660308	4658908	3e-158	563	1	S
s_1_1_contig201132	gi|224381666|ref|NC_011462.1chromosome1	71.02	1739	299	41	1836	3511	4662096	4663692	0	865	3	S
s_1_1_contig213711	gi|224381666|ref|NC_011462.1chromosome1	76.5	532	90	11	465	975	4664228	4663711	1e-102	378	1	S
s_1_1_contig113104	gi|224381666|ref|NC_011462.1chromosome1	70.62	3911	751	98	3400	7168	4666092	4669746	0	1790	2	S
s_1_1_contig103722	gi|224381666|ref|NC_011462.1chromosome1	73.5	3272	612	69	39	3216	4673673	4670563	0	1911	2	S
s_1_1_contig53036	gi|224381666|ref|NC_011462.1chromosome1	73.39	2931	527	86	1748	4586	4674794	4677563	0	1609	3	S
s_1_1_contig181087	gi|224381666|ref|NC_011462.1chromosome1	71.88	1401	222	30	80	1396	4679689	4678377	0	771	1	S
s_1_1_contig263747	gi|224381666|ref|NC_011462.1chromosome1	72.77	1667	311	42	84	1674	4679885	4681484	0	899	1	S
s_1_1_contig119800	gi|224381666|ref|NC_011462.1chromosome1	74.93	1528	264	36	49	1551	4681966	4683399	0	975	1667	M
s_1_1_contig69037	gi|224381666|ref|NC_011462.1chromosome1	75.1	3105	453	69	13623	16633	4697130	4694252	0	2093	308	M
s_1_1_contig36883	gi|224381666|ref|NC_011462.1chromosome1	72.56	164	29	2	451	598	4704468	4704631	1e-18	99	957	M
s_1_1_contig88161	gi|224381666|ref|NC_011462.1chromosome1	75.06	5184	947	97	2674	7627	4721321	4716254	0	3395	1	S
s_1_1_contig261850	gi|224381666|ref|NC_011462.1chromosome1	74.52	675	116	12	97	757	4726450	4725818	5e-121	439	2	S
s_1_1_contig77845	gi|224381666|ref|NC_011462.1chromosome1	74.34	2124	373	44	4155	6230	4729418	4727419	0	1330	3	S
s_1_1_contig184125	gi|224381666|ref|NC_011462.1chromosome1	74.86	1225	209	26	323	1504	4734070	4735238	0	792	1	S
s_1_1_contig190830	gi|224381666|ref|NC_011462.1chromosome1	73.32	1237	237	27	2	1200	4736572	4735391	0	706	1	S
s_1_1_contig74013	gi|224381666|ref|NC_011462.1chromosome1	73.66	1359	252	27	4535	5850	4744472	4745767	0	810	5	S
s_1_1_contig217007	gi|224381666|ref|NC_011462.1chromosome1	73.31	1270	239	20	8	1235	4745762	4746973	0	762	1	S
s_1_1_contig5747	gi|224381666|ref|NC_011462.1chromosome1	75.8	3033	577	49	17	3003	4746967	4749888	0	2082	2	S
s_1_1_contig70513	gi|224381666|ref|NC_011462.1chromosome1	71.53	5170	957	112	8853	13875	4763873	4768674	0	2646	383	M
s_1_1_contig229168	gi|224381666|ref|NC_011462.1chromosome1	72.8	1588	314	37	2	1529	4773982	4772453	0	856	2	S
s_1_1_contig73901	gi|224381666|ref|NC_011462.1chromosome1	77.13	1141	195	18	2048	3140	4775417	4776539	0	859	3	S
s_1_1_contig264207	gi|224381666|ref|NC_011462.1chromosome1	70.35	1447	258	35	23	1374	4779374	4778004	0	672	1	S
s_1_1_contig96139	gi|224381666|ref|NC_011462.1chromosome1	73.05	1696	321	36	1	1652	4783285	4781682	0	958	2	S
s_1_1_contig21896	gi|224381666|ref|NC_011462.1chromosome1	75.91	909	141	27	1	888	4784133	4783282	6e-170	601	1	S
s_1_1_contig55606	gi|224381666|ref|NC_011462.1chromosome1	73.67	2385	368	63	1	2266	4784127	4786370	0	1420	3	S
s_1_1_contig133728	gi|224381666|ref|NC_011462.1chromosome1	75.63	2864	499	57	2113	4896	4792164	4794908	0	1941	4	S
s_1_1_contig174527	gi|224381666|ref|NC_011462.1chromosome1	71.88	3595	716	74	1319	4818	4800914	4797520	0	1858	2	S
s_1_1_contig170603	gi|224381666|ref|NC_011462.1chromosome1	80.09	447	71	7	566	1007	4802739	4802306	2e-106	390	1	S
s_1_1_contig160689	gi|224381666|ref|NC_011462.1chromosome1	72.5	2880	511	65	152	2911	4806631	4803913	0	1584	1	S
s_1_1_contig181347	gi|224381666|ref|NC_011462.1chromosome1	73.6	1318	259	25	62	1363	4810059	4808815	0	776	3	S
s_1_1_contig103445	gi|224381666|ref|NC_011462.1chromosome1	74.4	1539	286	35	1951	3443	4811775	4810299	0	939	2	S
s_1_1_contig78553	gi|224381666|ref|NC_011462.1chromosome1	74.15	1563	276	40	2024	3563	4821166	4819709	0	933	8	S
s_1_1_contig260838	gi|224381666|ref|NC_011462.1chromosome1	74.09	7032	1161	153	6688	13469	4831685	4825065	0	4374	7	S
s_1_1_contig128797	gi|224381666|ref|NC_011462.1chromosome1	79.76	1665	222	36	1	1646	4839325	4837757	0	1425	1	S
s_1_1_contig81520	gi|224381666|ref|NC_011462.1chromosome1	77.43	5467	862	110	12983	18214	4844948	4839619	0	4136	1294	M
s_1_1_contig154397	gi|224381666|ref|NC_011462.1chromosome1	70.31	714	149	15	32	696	4846991	4846292	2e-85	322	12	M
s_1_1_contig278864	gi|224381666|ref|NC_011462.1chromosome1	72.74	554	122	8	1100	1632	4846933	4846388	1e-81	309	56	M
s_1_1_contig89283	gi|224381666|ref|NC_011462.1chromosome1	74.07	297	66	6	1	286	4846795	4846499	4e-40	172	85	M
s_1_1_contig101206	gi|224381666|ref|NC_011462.1chromosome1	76.15	369	84	3	8	375	4846898	4846533	2e-65	259	37	M
s_1_1_contig227810	gi|224381666|ref|NC_011462.1chromosome1	75.95	420	88	7	1	414	4846945	4846533	1e-73	282	64	M
s_1_1_contig226408	gi|224381666|ref|NC_011462.1chromosome1	76.85	324	71	4	1	321	4846857	4846535	3e-58	232	1	S
s_1_1_contig78507	gi|224381666|ref|NC_011462.1chromosome1	79.59	343	66	4	4165	4504	4846889	4846548	3e-75	289	43	M
s_1_1_contig178774	gi|224381666|ref|NC_011462.1chromosome1	73.31	532	115	14	548	1063	4847093	4846573	4e-73	280	64	M
s_1_1_contig197421	gi|224381666|ref|NC_011462.1chromosome1	80.08	246	47	2	742	986	4846823	4846579	1e-53	215	1	S
s_1_1_contig160325	gi|224381666|ref|NC_011462.1chromosome1	75.88	427	91	7	19	438	4847001	4846580	3e-74	286	84	M
s_1_1_contig223525	gi|224381666|ref|NC_011462.1chromosome1	73.9	364	59	6	1	332	4846944	4846585	4e-59	233	202	M
s_1_1_contig123845	gi|224381666|ref|NC_011462.1chromosome1	78.7	399	66	11	1226	1618	4846974	4846589	3e-79	304	63	M
s_1_1_contig157758	gi|224381666|ref|NC_011462.1chromosome1	79.32	295	51	5	1498	1784	4846898	4846606	1e-61	244	5	M
s_1_1_contig254740	gi|224381666|ref|NC_011462.1chromosome1	69.97	313	79	5	144	443	4846933	4846623	8e-29	132	3	M
s_1_1_contig279440	gi|224381666|ref|NC_011462.1chromosome1	78.2	133	25	2	872	1000	4846546	4846678	5e-20	104	1035	M
s_1_1_contig146867	gi|224381666|ref|NC_011462.1chromosome1	77.96	245	48	3	1880	2123	4846932	4846693	1e-45	190	209	M
s_1_1_contig147211	gi|224381666|ref|NC_011462.1chromosome1	73.52	287	63	5	2599	2873	4846982	4846697	5e-38	165	17	M
s_1_1_contig244684	gi|224381666|ref|NC_011462.1chromosome1	76.44	208	35	3	525	721	4846921	4846717	3e-35	154	9	M
s_1_1_contig84163	gi|224381666|ref|NC_011462.1chromosome1	82.72	162	23	3	2980	3140	4846926	4846769	8e-36	158	23	M
s_1_1_contig196771	gi|224381666|ref|NC_011462.1chromosome1	72.12	165	31	3	56	207	4846932	4846770	3e-16	92	750	M
s_1_1_contig270765	gi|224381666|ref|NC_011462.1chromosome1	79.27	164	29	3	1085	1247	4846930	4846771	6e-29	134	6	M
s_1_1_contig232983	gi|224381666|ref|NC_011462.1chromosome1	77.57	214	43	4	1	213	4846984	4846775	1e-35	156	77	M
s_1_1_contig242926	gi|224381666|ref|NC_011462.1chromosome1	77.54	236	42	5	514	742	4847035	4846804	2e-41	174	381	M
s_1_1_contig221045	gi|224381666|ref|NC_011462.1chromosome1	76.12	268	55	5	1367	1627	4846551	4846816	3e-43	181	194	M
s_1_1_contig275510	gi|224381666|ref|NC_011462.1chromosome1	78.22	326	64	5	653	972	4846542	4846866	1e-64	251	13	M
s_1_1_contig251105	gi|224381666|ref|NC_011462.1chromosome1	72.86	280	55	3	565	823	4846593	4846872	1e-39	168	33	M
s_1_1_contig198252	gi|224381666|ref|NC_011462.1chromosome1	78.31	355	73	4	2508	2860	4846533	4846885	3e-72	279	12	M
s_1_1_contig242651	gi|224381666|ref|NC_011462.1chromosome1	79.17	264	52	3	488	749	4846636	4846898	2e-54	217	3	M
s_1_1_contig260752	gi|224381666|ref|NC_011462.1chromosome1	73.54	446	79	9	4170	4584	4846470	4846907	1e-68	268	3	M
s_1_1_contig161268	gi|224381666|ref|NC_011462.1chromosome1	80.2	202	33	5	2020	2218	4846716	4846913	3e-39	168	83	M
s_1_1_contig136998	gi|224381666|ref|NC_011462.1chromosome1	80.79	177	28	4	1287	1462	4846750	4846921	9e-35	154	8	M
s_1_1_contig249174	gi|224381666|ref|NC_011462.1chromosome1	80.68	207	35	3	510	715	4846720	4846922	1e-44	185	251	M
s_1_1_contig256764	gi|224381666|ref|NC_011462.1chromosome1	78.53	312	60	5	247	553	4846620	4846929	1e-62	244	22	M
s_1_1_contig217603	gi|224381666|ref|NC_011462.1chromosome1	69.55	440	76	10	3574	3997	4846533	4846930	1e-47	197	39	M
s_1_1_contig264181	gi|224381666|ref|NC_011462.1chromosome1	77.05	292	59	5	6390	6677	4846645	4846932	3e-51	210	1	S
s_1_1_contig238792	gi|224381666|ref|NC_011462.1chromosome1	73.83	363	60	4	637	967	4846573	4846932	7e-61	241	581	M
s_1_1_contig281323	gi|224381666|ref|NC_011462.1chromosome1	75.85	236	48	4	615	845	4846702	4846933	6e-37	159	21	M
s_1_1_contig47371	gi|224381666|ref|NC_011462.1chromosome1	75.51	543	126	4	217	759	4846402	4846937	6e-100	369	283	M
s_1_1_contig258466	gi|224381666|ref|NC_011462.1chromosome1	77.48	444	81	9	1	433	4846503	4846938	1e-87	327	273	M
s_1_1_contig256753	gi|224381666|ref|NC_011462.1chromosome1	74.03	181	31	5	353	521	4846767	4846943	2e-21	107	2615	M
s_1_1_contig182540	gi|224381666|ref|NC_011462.1chromosome1	80.29	340	57	6	919	1252	4846609	4846944	6e-77	293	21	M
s_1_1_contig184923	gi|224381666|ref|NC_011462.1chromosome1	80.22	182	32	2	949	1130	4846767	4846944	5e-37	161	24	M
s_1_1_contig218469	gi|224381666|ref|NC_011462.1chromosome1	72.11	337	65	5	1396	1706	4846611	4846944	6e-45	188	75	M
s_1_1_contig113933	gi|224381666|ref|NC_011462.1chromosome1	78.85	156	20	4	5271	5414	4846792	4846946	2e-26	127	33257	M
s_1_1_contig143537	gi|224381666|ref|NC_011462.1chromosome1	76.31	401	80	6	846	1235	4846582	4846978	1e-73	282	64	M
s_1_1_contig223882	gi|224381666|ref|NC_011462.1chromosome1	81.22	245	40	4	909	1151	4846751	4846991	8e-56	223	5	M
s_1_1_contig242782	gi|224381666|ref|NC_011462.1chromosome1	76.53	426	94	6	668	1091	4846584	4847005	4e-78	297	125	M
s_1_1_contig117705	gi|224381666|ref|NC_011462.1chromosome1	75.93	295	64	5	1817	2109	4846744	4847033	5e-47	196	339	M
s_1_1_contig211270	gi|224381666|ref|NC_011462.1chromosome1	86.49	37	5	0	386	422	4856360	4856324	0.026	45	21	M
s_1_1_contig60210	gi|224381666|ref|NC_011462.1chromosome1	75.34	1407	270	22	424	1786	4862727	4861354	0	944	2	S
s_1_1_contig236953	gi|224381666|ref|NC_011462.1chromosome1	79.54	259	44	4	736	991	4864920	4865172	8e-55	219	4	M
s_1_1_contig11933	gi|224381666|ref|NC_011462.1chromosome1	72.91	2492	438	64	3	2381	4870595	4868228	0	1377	30	M
s_1_1_contig201632	gi|224381666|ref|NC_011462.1chromosome1	75.81	1335	213	24	2692	4010	4873340	4874580	0	942	4	S
s_1_1_contig25975	gi|224381666|ref|NC_011462.1chromosome1	81.37	848	117	11	8	826	4874564	4875399	0	805	2	S
s_1_1_contig87152	gi|224381666|ref|NC_011462.1chromosome1	75.14	1448	234	28	108	1520	4875674	4877030	0	976	633	M
s_1_1_contig60778	gi|224381666|ref|NC_011462.1chromosome1	76.39	2423	404	55	6859	9199	4885312	4882976	0	1694	4	S
s_1_1_contig128395	gi|224381666|ref|NC_011462.1chromosome1	78.41	477	80	9	2016	2479	4882528	4882994	1e-101	376	2	S
s_1_1_contig51483	gi|224381666|ref|NC_011462.1chromosome1	83.39	2631	284	41	5665	8257	4896930	4894415	0	2727	11	M
s_1_1_contig207064	gi|224381666|ref|NC_011462.1chromosome1	83.33	60	9	1	260	319	4897280	4897222	3e-07	61	58	M
s_1_1_contig176750	gi|224381666|ref|NC_011462.1chromosome1	92.22	167	13	0	45	211	4903206	4903040	6e-62	242	1	S
s_1_1_contig122951	gi|224381666|ref|NC_011462.1chromosome1	72.04	3287	567	81	1155	4265	4910282	4907172	0	1737	8	S
s_1_1_contig131385	gi|224381666|ref|NC_011462.1chromosome1	85.49	379	48	3	11	384	4910881	4911257	1e-117	428	2	S
s_1_1_contig135534	gi|224381666|ref|NC_011462.1chromosome1	75.19	1999	367	43	2	1965	4914494	4912590	0	1292	2	S
s_1_1_contig175429	gi|224381666|ref|NC_011462.1chromosome1	75.81	558	76	16	1	511	4924966	4924421	2e-103	379	2	S
s_1_1_contig62917	gi|224381666|ref|NC_011462.1chromosome1	73.17	3183	552	66	3508	6539	4931199	4934230	0	1865	19	M
s_1_1_contig21353	gi|224381666|ref|NC_011462.1chromosome1	70.51	729	146	18	599	1278	4943135	4943843	3e-87	327	2	S
s_1_1_contig165704	gi|224381666|ref|NC_011462.1chromosome1	72.14	3335	625	61	270	3510	4948702	4945578	0	1826	139	M
s_1_1_contig262104	gi|224381666|ref|NC_011462.1chromosome1	71.2	1330	224	38	6983	8211	4952829	4951558	0	645	146	M
s_1_1_contig107050	gi|224381666|ref|NC_011462.1chromosome1	70.22	2995	607	71	12	2865	4966922	4964072	0	1317	4	S
s_1_1_contig265260	gi|224381666|ref|NC_011462.1chromosome1	72.51	833	190	12	26	838	4966947	4967760	3e-124	452	1	S
s_1_1_contig95993	gi|224381666|ref|NC_011462.1chromosome1	73.17	574	107	10	179	741	4974238	4973701	6e-90	338	2	S
s_1_1_contig165479	gi|224381666|ref|NC_011462.1chromosome1	70.5	817	179	18	43	822	4979843	4980634	2e-97	361	1	S
s_1_1_contig101990	gi|224381666|ref|NC_011462.1chromosome1	74.23	3686	716	75	7125	10726	4989560	4993095	0	2237	4	S
s_1_1_contig88422	gi|224381666|ref|NC_011462.1chromosome1	71.15	1875	372	49	4218	6029	4996065	4994297	0	874	5	S
s_1_1_contig109655	gi|224381666|ref|NC_011462.1chromosome1	71.39	3394	615	86	3032	6334	5006925	5010053	0	1676	3	S
s_1_1_contig166036	gi|224381666|ref|NC_011462.1chromosome1	69.39	1751	322	41	163	1855	5011877	5013471	0	749	2	S
s_1_1_contig242738	gi|224381666|ref|NC_011462.1chromosome1	79.84	387	67	3	129	506	5016063	5015679	2e-92	343	1	S
s_1_1_contig247198	gi|224381666|ref|NC_011462.1chromosome1	75.92	245	45	5	507	748	5016335	5016102	4e-39	167	1	S
s_1_1_contig113590	gi|224381666|ref|NC_011462.1chromosome1	78	1391	225	21	20	1378	5025327	5023986	0	1108	6	S
s_1_1_contig130602	gi|224381666|ref|NC_011462.1chromosome1	74.86	895	165	10	233	1121	5028232	5027392	1e-171	609	16	M
s_1_1_contig70289	gi|224381666|ref|NC_011462.1chromosome1	70.89	4329	773	99	177	4435	5028268	5032179	0	2120	5	S
s_1_1_contig108286	gi|224381666|ref|NC_011462.1chromosome1	75.92	1790	300	40	1248	2978	5039818	5038101	0	1223	3	S
s_1_1_contig113889	gi|224381666|ref|NC_011462.1chromosome1	73.65	2133	356	53	59	2089	5051281	5049253	0	1260	4	S
s_1_1_contig153417	gi|224381666|ref|NC_011462.1chromosome1	73.76	2069	363	39	16	2027	5054784	5052839	0	1270	2	S
s_1_1_contig173570	gi|224381666|ref|NC_011462.1chromosome1	74.39	785	138	16	93	836	5054783	5055545	6e-138	495	1	S
s_1_1_contig93801	gi|224381666|ref|NC_011462.1chromosome1	76.3	1582	267	35	3025	4559	5057146	5055626	0	1103	3	S
s_1_1_contig211812	gi|224381666|ref|NC_011462.1chromosome1	75.93	1728	313	32	1	1692	5061409	5059749	0	1189	1	S
s_1_1_contig132960	gi|224381666|ref|NC_011462.1chromosome1	77.64	2849	432	62	278	3029	5064233	5061493	0	2172	5	M
s_1_1_contig53285	gi|224381666|ref|NC_011462.1chromosome1	73.92	7035	1183	148	7212	13933	5072210	5065515	0	4334	4	S
s_1_1_contig63271	gi|224381666|ref|NC_011462.1chromosome1	78.67	3830	597	50	18400	22165	5091412	5087739	0	3196	13	S
s_1_1_contig121476	gi|224381666|ref|NC_011462.1chromosome1	75.87	4053	693	65	712	4673	5110076	5113934	0	2865	2	S
s_1_1_contig116062	gi|224381666|ref|NC_011462.1chromosome1	80.78	1686	285	18	271	1935	5114066	5115733	0	1534	6	S
s_1_1_contig149175	gi|224381666|ref|NC_011462.1chromosome1	78.95	2238	371	28	536	2710	5121683	5119483	0	1876	3	S
s_1_1_contig90937	gi|224381666|ref|NC_011462.1chromosome1	72.97	4691	881	92	30	4556	5131036	5126569	0	2677	4	M
s_1_1_contig178246	gi|224381666|ref|NC_011462.1chromosome1	75.22	1376	232	24	6	1331	5131083	5132399	0	935	1	S
s_1_1_contig87793	gi|224381666|ref|NC_011462.1chromosome1	78.2	2037	344	23	4781	6804	5136937	5138886	0	1658	11	S
s_1_1_contig110456	gi|224381666|ref|NC_011462.1chromosome1	77.2	2781	485	50	1561	4276	5151004	5153700	0	2066	3	S
s_1_1_contig5927	gi|224381666|ref|NC_011462.1chromosome1	76.18	3682	623	65	1657	5252	5155426	5158939	0	2623	2	S
s_1_1_contig5896	gi|224381666|ref|NC_011462.1chromosome1	74.42	2787	524	50	161	2895	5162640	5159991	0	1757	2	S
s_1_1_contig57091	gi|224381666|ref|NC_011462.1chromosome1	75.24	3510	665	71	167	3585	5163013	5166409	0	2277	3	S
s_1_1_contig232198	gi|224381666|ref|NC_011462.1chromosome1	71.78	2711	524	64	103	2731	5170013	5167462	0	1370	1	S
s_1_1_contig236965	gi|224381666|ref|NC_011462.1chromosome1	82.68	768	117	5	904	1656	5170909	5170143	0	778	2	S
s_1_1_contig57094	gi|224381666|ref|NC_011462.1chromosome1	75.58	3628	606	66	1620	5118	5173333	5176809	0	2504	1025	M
s_1_1_contig233358	gi|224381666|ref|NC_011462.1chromosome1	78.95	1406	219	22	1	1375	5184399	5183040	0	1171	2	S
s_1_1_contig10690	gi|224381666|ref|NC_011462.1chromosome1	70.58	622	125	22	223	821	5184816	5185402	4e-64	250	1	S
s_1_1_contig19834	gi|224381666|ref|NC_011462.1chromosome1	73.77	1117	211	23	25	1135	5186909	5187949	0	664	1	S
s_1_1_contig17398	gi|224381666|ref|NC_011462.1chromosome1	76.1	887	145	18	2754	3616	5188062	5188905	8e-176	623	1	S
s_1_1_contig61633	gi|224381666|ref|NC_011462.1chromosome1	71.87	3054	619	72	71	3014	5189061	5191984	0	1526	1248	M
s_1_1_contig93316	gi|224381666|ref|NC_011462.1chromosome1	75.66	2954	511	49	5738	8576	5196869	5194009	0	2053	1296	M
s_1_1_contig2381	gi|224381666|ref|NC_011462.1chromosome1	76.61	932	177	23	1	908	5201977	5202891	4e-179	632	1	S
s_1_1_contig89591	gi|224381666|ref|NC_011462.1chromosome1	69.2	2208	403	62	797	2874	5207684	5205624	0	886	3	S
s_1_1_contig109664	gi|224381666|ref|NC_011462.1chromosome1	72.91	2086	322	45	3254	5229	5211953	5213905	0	1231	8	M
s_1_1_contig151119	gi|224381666|ref|NC_011462.1chromosome1	84.4	1609	151	20	10	1547	5217999	5216420	0	1770	2	S
s_1_1_contig184685	gi|224381666|ref|NC_011462.1chromosome1	75.39	1544	277	34	3	1500	5218456	5219942	0	1011	2	S
s_1_1_contig183554	gi|224381666|ref|NC_011462.1chromosome1	69.1	1094	216	24	10	1006	5223099	5222031	2e-124	452	1120	M
s_1_1_contig141247	gi|224381666|ref|NC_011462.1chromosome1	73.94	1036	186	25	290	1294	5223598	5224580	2e-173	614	19	M
s_1_1_contig191407	gi|224381666|ref|NC_011462.1chromosome1	72	300	55	17	564	847	5225180	5224894	1e-22	113	39	M
s_1_1_contig47336	gi|224381666|ref|NC_011462.1chromosome1	70.77	130	32	2	57	185	5224957	5225081	3e-07	61	56	M
s_1_1_contig246295	gi|224381666|ref|NC_011462.1chromosome1	70.63	143	31	3	14	152	5225045	5225180	6e-09	66	9	M
s_1_1_contig207608	gi|224381666|ref|NC_011462.1chromosome1	69.37	382	73	15	156	528	5224853	5225199	2e-29	134	1	S
s_1_1_contig160874	gi|224381666|ref|NC_011462.1chromosome1	94.87	39	1	1	2921	2958	5226299	5226337	5e-06	59	1069	M
s_1_1_contig102695	gi|224381666|ref|NC_011462.1chromosome1	94	50	3	0	4796	4845	5226295	5226344	3e-11	77	3793	M
s_1_1_contig77805	gi|224381666|ref|NC_011462.1chromosome1	70.23	2761	498	55	1887	4487	5229465	5226869	0	1317	3	S
s_1_1_contig256861	gi|224381666|ref|NC_011462.1chromosome1	76.05	405	74	9	306	700	5230587	5230978	3e-71	273	1	S
s_1_1_contig16723	gi|224381666|ref|NC_011462.1chromosome1	81.97	61	11	0	1257	1317	5234679	5234739	7e-07	61	435	M
s_1_1_contig59957	gi|224381666|ref|NC_011462.1chromosome1	77.25	3384	536	60	4729	8011	5235740	5238990	0	2572	5	S
s_1_1_contig258784	gi|224381666|ref|NC_011462.1chromosome1	92.86	28	2	0	281	308	5239228	5239201	0.074	43	6	M
s_1_1_contig116171	gi|224381666|ref|NC_011462.1chromosome1	74.07	6892	1226	146	2339	9020	5250029	5243489	0	4221	4	S
s_1_1_contig71327	gi|224381666|ref|NC_011462.1chromosome1	73.45	2738	483	78	1634	4290	5258998	5256424	0	1528	4	S
s_1_1_contig73075	gi|224381666|ref|NC_011462.1chromosome1	75.31	4305	660	74	1985	5994	5271063	5266867	0	3002	4	S
s_1_1_contig90480	gi|224381666|ref|NC_011462.1chromosome1	79.13	4251	660	62	1	4136	5272384	5276522	0	3593	10	M
s_1_1_contig78986	gi|224381666|ref|NC_011462.1chromosome1	79.26	13197	1992	209	7079	19869	5301996	5289139	0	11190	8	S
s_1_1_contig110684	gi|224381666|ref|NC_011462.1chromosome1	78.75	367	72	5	3567	3930	5307596	5307233	3e-76	293	194	M
s_1_1_contig278421	gi|224381666|ref|NC_011462.1chromosome1	72.39	402	99	6	146	537	5307243	5307642	8e-52	208	1	S
s_1_1_contig100766	gi|224381666|ref|NC_011462.1chromosome1	75.37	5119	900	80	1	4956	5309374	5314294	0	3512	2	S
s_1_1_contig200089	gi|224381666|ref|NC_011462.1chromosome1	77.29	982	152	20	32	953	5315568	5316538	0	740	3	S
s_1_1_contig273090	gi|224381666|ref|NC_011462.1chromosome1	71.53	878	169	20	11	862	5319184	5318362	4e-121	439	1	S
s_1_1_contig212658	gi|224381666|ref|NC_011462.1chromosome1	73.09	327	74	5	1	327	5319800	5319488	3e-44	183	35	M
s_1_1_contig172289	gi|224381666|ref|NC_011462.1chromosome1	72.77	1322	246	30	470	1728	5321842	5320572	0	729	2	S
s_1_1_contig85629	gi|224381666|ref|NC_011462.1chromosome1	72.56	4556	798	92	1	4444	5323412	5327627	0	2574	71	M
s_1_1_contig43104	gi|224381666|ref|NC_011462.1chromosome1	73.85	218	38	3	36	252	5328119	5327920	3e-31	140	1	S
s_1_1_contig140472	gi|224381666|ref|NC_011462.1chromosome1	79.61	1290	216	21	1309	2576	5329414	5328150	0	1088	3	S
s_1_1_contig83323	gi|224381666|ref|NC_011462.1chromosome1	79.95	2065	317	25	4	2030	5333195	5331190	0	1833	2	S
s_1_1_contig1473	gi|224381666|ref|NC_011462.1chromosome1	78.45	682	134	7	59	737	5333302	5333973	1e-153	547	1	S
s_1_1_contig188748	gi|224381666|ref|NC_011462.1chromosome1	75.94	3300	570	45	466	3718	5333980	5337102	0	2370	2	S
s_1_1_contig102960	gi|224381666|ref|NC_011462.1chromosome1	84.22	824	109	10	2444	3261	5340709	5341517	0	874	3	S
s_1_1_contig25152	gi|224381666|ref|NC_011462.1chromosome1	70.2	151	25	3	8	158	5342474	5342344	2e-11	75	33	M
s_1_1_contig65766	gi|224381666|ref|NC_011462.1chromosome1	78.37	4040	578	75	30	3943	5342509	5346378	0	3274	5	S
s_1_1_contig127632	gi|224381666|ref|NC_011462.1chromosome1	77.74	2143	373	29	81	2174	5352409	5354496	0	1678	1	S
s_1_1_contig73005	gi|224381666|ref|NC_011462.1chromosome1	73.95	2941	480	50	19	2835	5354827	5357605	0	1884	1	S
s_1_1_contig74673	gi|224381666|ref|NC_011462.1chromosome1	76.48	3737	656	58	80	3711	5367100	5363482	0	2717	5	S
s_1_1_contig14719	gi|224381666|ref|NC_011462.1chromosome1	73.65	1647	280	25	114	1667	5367412	5368997	0	1040	2	S
s_1_1_contig219396	gi|224381666|ref|NC_011462.1chromosome1	78.26	1127	175	15	40	1100	5370604	5371726	0	924	1	S
s_1_1_contig227814	gi|224381666|ref|NC_011462.1chromosome1	77.89	674	111	12	1000	1656	5372489	5373141	3e-146	524	1	S
s_1_1_contig108444	gi|224381666|ref|NC_011462.1chromosome1	75.19	1725	305	24	2506	4194	5374841	5376478	0	1184	2	S
s_1_1_contig279189	gi|224381666|ref|NC_011462.1chromosome1	73.79	290	49	2	3	265	5376516	5376805	6e-48	196	1	S
s_1_1_contig171293	gi|224381666|ref|NC_011462.1chromosome1	80.12	1514	246	14	1	1499	5380270	5378797	0	1361	16	M
s_1_1_contig174104	gi|224381666|ref|NC_011462.1chromosome1	79.04	544	68	6	24	543	5380898	5380377	3e-134	482	1	S
s_1_1_contig10826	gi|224381666|ref|NC_011462.1chromosome1	75.97	1386	231	27	26	1397	5382210	5380913	0	969	1	S
s_1_1_contig60815	gi|224381666|ref|NC_011462.1chromosome1	73.38	2506	435	48	692	3131	5383491	5385830	0	1505	6	S
s_1_1_contig232869	gi|224381666|ref|NC_011462.1chromosome1	74.88	418	92	5	468	876	5388215	5387802	6e-70	269	2	M
s_1_1_contig242325	gi|224381666|ref|NC_011462.1chromosome1	75.66	189	42	2	25	211	5388210	5388024	6e-28	129	1	S
s_1_1_contig95224	gi|224381666|ref|NC_011462.1chromosome1	70.39	385	79	11	1855	2227	5387852	5388213	3e-37	163	1	S
s_1_1_contig171918	gi|224381666|ref|NC_011462.1chromosome1	74.65	359	70	6	463	817	5387877	5388218	5e-58	230	1	S
s_1_1_contig100536	gi|224381666|ref|NC_011462.1chromosome1	73.33	195	38	7	1776	1957	5388046	5388239	1e-17	99	2485	M
s_1_1_contig94720	gi|224381666|ref|NC_011462.1chromosome1	72.93	4085	751	83	1	3957	5400696	5396839	0	2327	2	S
s_1_1_contig158921	gi|224381666|ref|NC_011462.1chromosome1	86.67	45	6	0	2271	2315	5400366	5400410	5e-05	55	308	M
s_1_1_contig160014	gi|224381666|ref|NC_011462.1chromosome1	77.59	1789	288	27	1	1715	5400675	5402424	0	1398	2	S
s_1_1_contig209798	gi|224381666|ref|NC_011462.1chromosome1	70.63	664	116	12	1	651	5403944	5403347	3e-90	336	1	S
s_1_1_contig121684	gi|224381666|ref|NC_011462.1chromosome1	74.98	3082	487	63	96	3095	5406850	5403971	0	2055	1	S
s_1_1_contig203386	gi|224381666|ref|NC_011462.1chromosome1	96.55	29	1	0	1455	1483	5410725	5410697	0.005	48	239	M
s_1_1_contig257194	gi|224381666|ref|NC_011462.1chromosome1	100	20	0	0	682	701	5411560	5411541	4	37	1	S
s_1_1_contig82175	gi|224381666|ref|NC_011462.1chromosome1	76.54	3001	499	59	3404	6340	5410714	5413573	0	2158	5	S
s_1_1_contig145348	gi|224381666|ref|NC_011462.1chromosome1	73.74	575	89	19	184	745	5417522	5416997	4e-87	327	1	S
s_1_1_contig71441	gi|224381666|ref|NC_011462.1chromosome1	74.46	1660	307	23	3	1630	5420809	5419235	0	1085	2	S
s_1_1_contig121310	gi|224381666|ref|NC_011462.1chromosome1	77.29	1048	190	12	2620	3648	5421852	5420834	0	807	6	S
s_1_1_contig186220	gi|224381666|ref|NC_011462.1chromosome1	100	26	0	0	1173	1198	5443977	5443952	0.006	48	901	M
s_1_1_contig268504	gi|224381666|ref|NC_011462.1chromosome1	88.68	53	6	0	1870	1922	5444012	5443960	2e-09	70	925	M
s_1_1_contig236619	gi|224381666|ref|NC_011462.1chromosome1	91.49	47	4	0	983	1029	5443950	5443996	3e-09	68	2884	M
s_1_1_contig151236	gi|224381666|ref|NC_011462.1chromosome1	83.23	161	25	2	1	160	5443910	5444069	1e-36	161	40	M
s_1_1_contig91200	gi|224381666|ref|NC_011462.1chromosome1	84.62	78	10	2	1	77	5444132	5444208	4e-12	81	140	M
s_1_1_contig275759	gi|224381666|ref|NC_011462.1chromosome1	74.25	334	76	8	252	579	5443890	5444219	2e-45	188	318	M
s_1_1_contig56995	gi|224381666|ref|NC_011462.1chromosome1	88.33	2339	189	26	1	2315	5447421	5445143	0	2946	15	M
s_1_1_contig218546	gi|224381666|ref|NC_011462.1chromosome1	82.65	3705	435	60	3	3627	5451245	5447669	0	3699	1	S
s_1_1_contig39575	gi|224381666|ref|NC_011462.1chromosome1	78.95	912	143	16	3	883	5451129	5452022	0	751	1	S
s_1_1_contig119446	gi|224381666|ref|NC_011462.1chromosome1	81.98	555	77	10	721	1264	5452944	5452402	6e-147	526	2	S
s_1_1_contig61580	gi|224381666|ref|NC_011462.1chromosome1	71.99	5388	964	137	7691	12903	5459435	5454418	0	2787	4	S
s_1_1_contig73710	gi|224381666|ref|NC_011462.1chromosome1	77.24	3291	451	66	90	3277	5483900	5480805	0	2529	1671	M
s_1_1_contig57618	gi|224381666|ref|NC_011462.1chromosome1	78.87	2168	309	37	293	2404	5483906	5485980	0	1813	107	M
s_1_1_contig142442	gi|224381666|ref|NC_011462.1chromosome1	88.8	3001	248	30	3	2958	5487742	5490699	0	3842	1	S
s_1_1_contig264360	gi|224381666|ref|NC_011462.1chromosome1	69.83	2489	392	66	1384	3721	5491244	5493524	0	1130	1	S
s_1_1_contig149312	gi|224381666|ref|NC_011462.1chromosome1	73.88	2500	395	53	1085	3481	5494757	5497101	0	1559	3	M
s_1_1_contig200079	gi|224381666|ref|NC_011462.1chromosome1	79.59	1455	208	30	1	1430	5497136	5498526	0	1231	2	S
s_1_1_contig59182	gi|224381666|ref|NC_011462.1chromosome1	71.95	7548	1346	193	13368	20602	5506452	5499363	0	3892	7	S
s_1_1_contig203559	gi|224381666|ref|NC_011462.1chromosome1	68.42	1311	277	36	1	1254	5521096	5519866	2e-126	459	1	S
s_1_1_contig150779	gi|224381666|ref|NC_011462.1chromosome1	72.92	528	72	11	898	1369	5521874	5522386	1e-85	322	2	S
s_1_1_contig148635	gi|224381666|ref|NC_011462.1chromosome1	71.97	3404	634	86	138	3395	5525649	5522420	0	1739	1	S
s_1_1_contig275037	gi|224381666|ref|NC_011462.1chromosome1	67.11	526	100	12	1	526	5526186	5525734	2e-43	181	502	M
s_1_1_contig247731	gi|224381666|ref|NC_011462.1chromosome1	75.36	633	115	14	237	852	5528996	5528388	1e-112	412	1	S
s_1_1_contig190114	gi|224381666|ref|NC_011462.1chromosome1	83.72	43	7	0	10	52	5532192	5532150	0.013	46	95	M
s_1_1_contig212887	gi|224381666|ref|NC_011462.1chromosome1	88.89	36	4	0	64	99	5532194	5532159	0.001	48	80	M
s_1_1_contig259357	gi|224381666|ref|NC_011462.1chromosome1	94.12	34	2	0	583	616	5532157	5532190	5e-05	54	64	M
s_1_1_contig146953	gi|224381666|ref|NC_011462.1chromosome1	88.24	34	4	0	2919	2952	5532159	5532192	0.11	45	30	M
s_1_1_contig259798	gi|224381666|ref|NC_011462.1chromosome1	83.67	49	6	1	909	957	5532159	5532205	0.0009	50	79	M
s_1_1_contig278943	gi|224381666|ref|NC_011462.1chromosome1	86.27	51	5	1	446	496	5532157	5532205	8e-07	59	103	M
s_1_1_contig79850	gi|224381666|ref|NC_011462.1chromosome1	76.46	2596	440	58	1602	4109	5534059	5536571	0	1820	3	S
s_1_1_contig73625	gi|224381666|ref|NC_011462.1chromosome1	72.99	1670	321	38	1132	2744	5540581	5538985	0	924	1	S
s_1_1_contig87027	gi|224381666|ref|NC_011462.1chromosome1	72	2429	453	56	27	2340	5541016	5543332	0	1267	2	S
s_1_1_contig155505	gi|224381666|ref|NC_011462.1chromosome1	72.07	3946	695	104	17	3753	5545358	5549105	0	2046	1	S
s_1_1_contig178357	gi|224381666|ref|NC_011462.1chromosome1	77.98	109	14	2	714	822	5549475	5549573	9e-16	90	95	M
s_1_1_contig108722	gi|224381666|ref|NC_011462.1chromosome1	72.58	3009	581	73	41	2939	5549596	5552470	0	1599	2	S
s_1_1_contig193444	gi|224381666|ref|NC_011462.1chromosome1	69.71	2027	424	60	130	2067	5558820	5556895	0	789	1149	M
s_1_1_contig175457	gi|224381666|ref|NC_011462.1chromosome1	68.93	1635	343	51	33	1593	5558931	5560474	1e-162	578	1	S
s_1_1_contig238390	gi|224381666|ref|NC_011462.1chromosome1	70.08	986	201	23	15	982	5561541	5560632	3e-118	430	1	S
s_1_1_contig186113	gi|224381666|ref|NC_011462.1chromosome1	70.8	654	144	18	5	639	5561559	5562184	3e-73	280	2	S
s_1_1_contig132787	gi|224381666|ref|NC_011462.1chromosome1	74.25	1274	233	30	183	1428	5563909	5562703	0	769	1	S
s_1_1_contig157104	gi|224381666|ref|NC_011462.1chromosome1	75.35	1128	189	18	22	1133	5566487	5565433	0	780	2	S
s_1_1_contig22393	gi|224381666|ref|NC_011462.1chromosome1	68.63	848	172	20	100	899	5566556	5567357	7e-87	325	1	S
s_1_1_contig17625	gi|224381666|ref|NC_011462.1chromosome1	71.71	1301	235	41	1	1279	5567322	5568511	5e-176	623	1	S
s_1_1_contig5736	gi|224381666|ref|NC_011462.1chromosome1	72.41	1305	272	30	1	1260	5570712	5571973	0	675	2	S
s_1_1_contig112155	gi|224381666|ref|NC_011462.1chromosome1	69.39	1578	305	39	1008	2478	5574351	5572845	0	654	78	M
s_1_1_contig122585	gi|224381666|ref|NC_011462.1chromosome1	71.36	2367	482	44	1	2275	5577129	5574867	0	1191	1	S
s_1_1_contig242375	gi|224381666|ref|NC_011462.1chromosome1	73.81	1172	227	37	1	1129	5578535	5579669	4e-180	636	2	S
s_1_1_contig147515	gi|224381666|ref|NC_011462.1chromosome1	68.89	691	119	20	1502	2172	5579952	5580566	1e-70	273	2	S
s_1_1_contig110157	gi|224381666|ref|NC_011462.1chromosome1	73.31	1735	304	45	2750	4435	5586605	5584981	0	982	110	M
s_1_1_contig53994	gi|224381666|ref|NC_011462.1chromosome1	73.37	2452	471	52	1	2341	5589571	5591951	0	1407	3	M
s_1_1_contig119913	gi|224381666|ref|NC_011462.1chromosome1	73.17	7466	1388	153	1	7187	5589871	5597000	0	4298	1	S
s_1_1_contig188247	gi|224381666|ref|NC_011462.1chromosome1	67.87	635	125	18	313	886	5600525	5599909	2e-53	215	1	S
s_1_1_contig53088	gi|224381666|ref|NC_011462.1chromosome1	76.91	2317	368	44	1218	3495	5612301	5610113	0	1719	5	S
s_1_1_contig274650	gi|224381666|ref|NC_011462.1chromosome1	76.4	1415	267	28	1	1385	5614647	5613270	0	980	1	S
s_1_1_contig244393	gi|224381666|ref|NC_011462.1chromosome1	71.24	1255	260	37	1	1218	5616057	5614867	3e-157	560	1	S
s_1_1_contig30357	gi|224381666|ref|NC_011462.1chromosome1	82.22	45	7	1	869	913	5615942	5615899	0.14	43	57	M
s_1_1_contig109890	gi|224381666|ref|NC_011462.1chromosome1	68.47	333	56	9	5120	5407	5616773	5617101	3e-27	131	33694	M
s_1_1_contig72136	gi|224381666|ref|NC_011462.1chromosome1	70.94	406	57	11	3113	3462	5616702	5617102	7e-50	206	3058	M
s_1_1_contig56416	gi|224381666|ref|NC_011462.1chromosome1	79.81	1511	223	12	3390	4842	5620740	5622226	0	1370	7	S
s_1_1_contig15843	gi|224381666|ref|NC_011462.1chromosome1	78.92	631	101	7	20	622	5624841	5625467	4e-150	536	2	S
s_1_1_contig124119	gi|224381666|ref|NC_011462.1chromosome1	83.59	835	107	10	907	1732	5628707	5627894	0	870	3	M
s_1_1_contig271702	gi|224381666|ref|NC_011462.1chromosome1	77.53	1553	271	28	2	1510	5630238	5628720	0	1171	1	S
s_1_1_contig108907	gi|224381666|ref|NC_011462.1chromosome1	74.02	1609	242	37	3676	5235	5631704	5630223	0	1009	2	S
s_1_1_contig65948	gi|224381666|ref|NC_011462.1chromosome1	75.35	3112	538	70	1577	4640	5641960	5639030	0	2046	2	S
s_1_1_contig48658	gi|224381666|ref|NC_011462.1chromosome1	71.12	561	116	10	32	568	5644903	5644365	6e-73	279	1	S
s_1_1_contig277134	gi|224381666|ref|NC_011462.1chromosome1	84.21	76	12	0	15	90	5647127	5647052	3e-14	84	210	M
s_1_1_contig153404	gi|224381666|ref|NC_011462.1chromosome1	75.87	2080	363	38	1806	3828	5650615	5648618	0	1442	3	S
s_1_1_contig109923	gi|224381666|ref|NC_011462.1chromosome1	77.72	1885	306	34	16	1853	5658087	5656270	0	1456	2	S
s_1_1_contig159577	gi|224381666|ref|NC_011462.1chromosome1	74.49	1921	345	39	5327	7222	5661444	5659644	0	1211	3	S
s_1_1_contig113974	gi|224381666|ref|NC_011462.1chromosome1	79.09	4002	577	57	12	3892	5667451	5663589	0	3422	1	S
s_1_1_contig127608	gi|224381666|ref|NC_011462.1chromosome1	74.15	1300	203	32	1382	2639	5668855	5670063	0	805	2	S
s_1_1_contig17611	gi|224381666|ref|NC_011462.1chromosome1	71.18	399	79	14	955	1336	5670511	5670890	7e-40	170	1	S
s_1_1_contig70381	gi|224381666|ref|NC_011462.1chromosome1	75.66	7674	1264	137	9470	16859	5679723	5687076	0	5344	302	M
s_1_1_contig279377	gi|224381666|ref|NC_011462.1chromosome1	71.33	279	70	10	588	856	5699484	5699206	3e-21	107	43	M
s_1_1_contig111610	gi|224381666|ref|NC_011462.1chromosome1	78.2	2949	465	45	1297	4118	5708776	5705879	0	2378	6	S
s_1_1_contig139256	gi|224381666|ref|NC_011462.1chromosome1	80.19	646	109	8	18	647	5712815	5712173	1e-159	569	4	S
s_1_1_contig5658	gi|224381666|ref|NC_011462.1chromosome1	75.52	1863	351	34	16	1820	5712831	5714646	0	1245	1	S
s_1_1_contig276769	gi|224381666|ref|NC_011462.1chromosome1	74.83	298	65	5	264	554	5715000	5714706	4e-45	187	1	S
s_1_1_contig101076	gi|224381666|ref|NC_011462.1chromosome1	76.94	1739	320	24	11	1704	5715776	5717478	0	1294	2	S
s_1_1_contig132691	gi|224381666|ref|NC_011462.1chromosome1	76.93	1916	277	34	41	1860	5720821	5718975	0	1458	1	S
s_1_1_contig150762	gi|224381666|ref|NC_011462.1chromosome1	78.96	1131	190	17	1	1114	5720777	5721876	0	933	1	S
s_1_1_contig236004	gi|224381666|ref|NC_011462.1chromosome1	71.1	1910	347	38	1	1828	5722296	5724082	0	969	1	S
s_1_1_contig199794	gi|224381666|ref|NC_011462.1chromosome1	71.67	2524	447	69	6	2408	5727383	5725007	0	1260	2	S
s_1_1_contig173848	gi|224381666|ref|NC_011462.1chromosome1	76.88	1194	208	22	933	2106	5728518	5727373	0	872	2	S
s_1_1_contig219124	gi|224381666|ref|NC_011462.1chromosome1	100	24	0	0	688	711	5731494	5731517	0.042	45	80	M
s_1_1_contig146782	gi|224381666|ref|NC_011462.1chromosome1	76.31	3854	704	48	4727	8543	5733103	5736784	0	2807	13	M
s_1_1_contig106159	gi|224381666|ref|NC_011462.1chromosome1	77.94	3703	568	49	2221	5818	5743015	5739457	0	2998	5	S
s_1_1_contig38472	gi|224381666|ref|NC_011462.1chromosome1	84.75	223	31	2	1	222	5745788	5745568	8e-62	242	1	S
s_1_1_contig76887	gi|224381666|ref|NC_011462.1chromosome1	74.38	2881	518	59	5960	8738	5768015	5765253	0	1801	101	M
s_1_1_contig110551	gi|224381666|ref|NC_011462.1chromosome1	74.32	1316	265	19	24	1312	5776577	5777846	0	830	1	S
s_1_1_contig277975	gi|224381666|ref|NC_011462.1chromosome1	77.31	335	66	5	1	327	5778448	5778116	9e-64	248	1	S
s_1_1_contig18660	gi|224381666|ref|NC_011462.1chromosome1	78.62	491	81	4	2	470	5778969	5778481	3e-114	416	1	S
s_1_1_contig257477	gi|224381666|ref|NC_011462.1chromosome1	83.33	42	4	1	307	345	5783694	5783653	0.083	43	18	M
s_1_1_contig258150	gi|224381666|ref|NC_011462.1chromosome1	88.89	36	1	1	464	496	5783688	5783653	0.008	46	22	M
s_1_1_contig110842	gi|224381666|ref|NC_011462.1chromosome1	75.43	4966	897	72	8269	13064	5785455	5790267	0	3422	4	S
s_1_1_contig55304	gi|224381666|ref|NC_011462.1chromosome1	79.12	3807	556	54	13477	17207	5794534	5790891	0	3254	10	S
s_1_1_contig93855	gi|224381666|ref|NC_011462.1chromosome1	71.59	1964	376	47	1990	3862	5812495	5810623	0	978	3	S
s_1_1_contig210559	gi|224381666|ref|NC_011462.1chromosome1	71.8	798	176	21	19	795	5814276	5815045	3e-101	374	2	S
s_1_1_contig99030	gi|224381666|ref|NC_011462.1chromosome1	75.32	1771	301	40	2149	3834	5820270	5818551	0	1166	36	M
s_1_1_contig55078	gi|224381666|ref|NC_011462.1chromosome1	74.89	912	156	15	1187	2071	5823166	5822301	4e-172	610	1	S
s_1_1_contig179094	gi|224381666|ref|NC_011462.1chromosome1	72.58	1685	348	30	235	1869	5824163	5825783	0	924	1	S
s_1_1_contig240114	gi|224381666|ref|NC_011462.1chromosome1	85.05	214	25	3	791	1003	5826401	5826608	1e-59	235	1	S
s_1_1_contig61319	gi|224381666|ref|NC_011462.1chromosome1	73.98	903	196	14	2	892	5829167	5828292	2e-151	542	3	S
s_1_1_contig208791	gi|224381666|ref|NC_011462.1chromosome1	69.02	1004	186	24	4	948	5829164	5830101	6e-113	414	1	S
s_1_1_contig165157	gi|224381666|ref|NC_011462.1chromosome1	70.24	2782	534	73	1	2676	5834793	5832200	0	1220	1	S
s_1_1_contig112799	gi|224381666|ref|NC_011462.1chromosome1	73.64	2151	437	39	1775	3867	5836191	5838269	0	1265	51	M
s_1_1_contig188582	gi|224381666|ref|NC_011462.1chromosome1	79.08	502	84	5	395	889	5844308	5843821	1e-117	428	2	S
s_1_1_contig266401	gi|224381666|ref|NC_011462.1chromosome1	71.36	1093	196	29	423	1480	5851478	5852488	3e-149	535	3	S
s_1_1_contig152201	gi|224381666|ref|NC_011462.1chromosome1	68.8	811	142	27	1	796	5854264	5853550	3e-79	300	1	S
s_1_1_contig41281	gi|224381666|ref|NC_011462.1chromosome1	84.3	726	85	10	1	706	5854265	5854981	0	776	1	S
s_1_1_contig139788	gi|224381666|ref|NC_011462.1chromosome1	74.84	2655	491	43	16	2622	5857901	5855376	0	1743	1	S
s_1_1_contig119684	gi|224381666|ref|NC_011462.1chromosome1	74.73	2548	443	48	585	3067	5858650	5861061	0	1656	4	S
s_1_1_contig157434	gi|224381666|ref|NC_011462.1chromosome1	76.22	143	16	6	1808	1939	5865114	5865249	5e-17	95	2207	M
s_1_1_contig218924	gi|224381666|ref|NC_011462.1chromosome1	88.89	72	6	2	1399	1468	5865201	5865272	5e-15	88	652	M
s_1_1_contig110943	gi|224381666|ref|NC_011462.1chromosome1	74.36	3031	538	64	140	3085	5868771	5865895	0	1891	2	S
s_1_1_contig144450	gi|224381666|ref|NC_011462.1chromosome1	75.06	1600	269	33	174	1732	5868798	5870308	0	1056	1	S
s_1_1_contig72410	gi|224381666|ref|NC_011462.1chromosome1	74.5	2663	470	56	4462	7059	5878389	5875871	0	1678	246	M
s_1_1_contig176201	gi|224381666|ref|NC_011462.1chromosome1	75.75	1744	247	31	4	1637	5884120	5882443	0	1258	1	S
s_1_1_contig143835	gi|224381666|ref|NC_011462.1chromosome1	68.66	284	63	6	400	670	5885867	5886137	7e-21	107	1205	M
s_1_1_contig227605	gi|224381666|ref|NC_011462.1chromosome1	75.47	587	102	12	615	1177	5886736	5886168	3e-107	394	2	S
s_1_1_contig267765	gi|224381666|ref|NC_011462.1chromosome1	74.06	1897	346	32	1	1822	5889757	5887932	0	1191	1	S
s_1_1_contig120483	gi|224381666|ref|NC_011462.1chromosome1	73.61	4297	777	82	1274	5498	5896964	5892953	0	2589	5	S
s_1_1_contig138822	gi|224381666|ref|NC_011462.1chromosome1	74.6	3338	551	72	560	3802	5902268	5899133	0	2140	2	S
s_1_1_contig63901	gi|224381666|ref|NC_011462.1chromosome1	74.38	2740	511	49	1617	4293	5903944	5906555	0	1728	5	S
s_1_1_contig212285	gi|224381666|ref|NC_011462.1chromosome1	79.33	450	74	11	594	1027	5910811	5910365	4e-97	360	1	S
s_1_1_contig121529	gi|224381666|ref|NC_011462.1chromosome1	74.58	2986	583	58	1	2939	5914978	5912122	0	1860	2	S
s_1_1_contig81517	gi|224381666|ref|NC_011462.1chromosome1	77.74	1042	171	9	32	1052	5918257	5917256	0	848	7	M
s_1_1_contig143902	gi|224381666|ref|NC_011462.1chromosome1	72.23	1253	285	22	1233	2442	5922281	5921049	0	648	4	S
s_1_1_contig26075	gi|224381666|ref|NC_011462.1chromosome1	88.89	63	7	0	436	498	5926728	5926790	9e-14	82	49	M
s_1_1_contig44717	gi|224381666|ref|NC_011462.1chromosome1	83.03	165	23	2	463	622	5928760	5928924	3e-39	167	33	M
s_1_1_contig120620	gi|224381666|ref|NC_011462.1chromosome1	74.5	1392	266	35	7320	8658	5930922	5932277	0	832	1640	M
s_1_1_contig69196	gi|224381666|ref|NC_011462.1chromosome1	74.55	2110	378	37	15635	17690	5946479	5948483	0	1361	520	M
s_1_1_contig140877	gi|224381666|ref|NC_011462.1chromosome1	76.36	1231	219	23	19	1215	5960178	5958986	0	870	8	M
s_1_1_contig95571	gi|224381666|ref|NC_011462.1chromosome1	72.48	3288	607	69	3332	6489	5969469	5972588	0	1808	3	S
s_1_1_contig3857	gi|224381666|ref|NC_011462.1chromosome1	74.22	1276	222	19	52	1265	5975292	5974062	0	829	1	S
s_1_1_contig251511	gi|224381666|ref|NC_011462.1chromosome1	79.47	950	141	18	38	961	5976384	5975463	0	801	1	S
s_1_1_contig81288	gi|224381666|ref|NC_011462.1chromosome1	74.44	900	158	17	840	1713	5981451	5982304	4e-161	574	6	S
s_1_1_contig139720	gi|224381666|ref|NC_011462.1chromosome1	79.17	1671	303	19	927	2567	5985927	5987582	0	1400	3	S
s_1_1_contig175321	gi|224381666|ref|NC_011462.1chromosome1	74.27	1547	243	40	36	1471	5994153	5992651	0	955	3	S
s_1_1_contig154737	gi|224381666|ref|NC_011462.1chromosome1	68.77	1239	247	27	368	1558	5994241	5995387	1e-137	495	1	S
s_1_1_contig64074	gi|224381666|ref|NC_011462.1chromosome1	76.3	3822	670	57	1865	5595	6002343	5998667	0	2764	6	M
s_1_1_contig43769	gi|224381666|ref|NC_011462.1chromosome1	69.59	1766	341	43	25	1750	6005725	6004116	0	747	1	S
s_1_1_contig11979	gi|224381666|ref|NC_011462.1chromosome1	74.33	1453	257	30	9	1395	6016630	6015228	0	908	5	S
s_1_1_contig139383	gi|224381666|ref|NC_011462.1chromosome1	71.83	1466	269	29	3517	4888	6018516	6017101	0	782	7	S
s_1_1_contig192295	gi|224381666|ref|NC_011462.1chromosome1	73.02	530	114	11	351	870	6022125	6022635	2e-75	288	1	S
s_1_1_contig226998	gi|224381666|ref|NC_011462.1chromosome1	74.96	675	123	11	26	692	6022595	6023231	1e-123	448	1	S
s_1_1_contig261016	gi|224381666|ref|NC_011462.1chromosome1	77.39	2096	343	24	1782	3848	6025923	6023930	0	1653	2	S
s_1_1_contig87755	gi|224381666|ref|NC_011462.1chromosome1	80.24	1422	204	22	8	1383	6030180	6031570	0	1269	2	S
s_1_1_contig123068	gi|224381666|ref|NC_011462.1chromosome1	74.23	3656	727	59	2639	6199	6035273	6038808	0	2275	205	M
s_1_1_contig254057	gi|224381666|ref|NC_011462.1chromosome1	70.16	258	62	3	165	413	6039342	6039091	1e-24	118	1390	M
s_1_1_contig105789	gi|224381666|ref|NC_011462.1chromosome1	73.94	3626	640	76	5938	9432	6042892	6039441	0	2212	4	S
s_1_1_contig125997	gi|224381666|ref|NC_011462.1chromosome1	83.91	87	14	0	1531	1617	6042890	6042976	5e-17	95	17536	M
s_1_1_contig218349	gi|224381666|ref|NC_011462.1chromosome1	84.34	83	6	2	67	143	6045092	6045011	3e-15	90	21524	M
s_1_1_contig27635	gi|224381666|ref|NC_011462.1chromosome1	75.38	65	16	0	650	714	6056828	6056764	0.008	46	79	M
s_1_1_contig75270	gi|224381666|ref|NC_011462.1chromosome1	74.05	3650	680	78	7487	11018	6054993	6058493	0	2203	5	S
s_1_1_contig52166	gi|224381666|ref|NC_011462.1chromosome1	74.2	500	104	6	157	640	6062106	6062596	9e-84	316	2	S
s_1_1_contig47976	gi|224381666|ref|NC_011462.1chromosome1	81.82	44	8	0	40	83	6062874	6062917	0.03	45	32	M
s_1_1_contig273799	gi|224381666|ref|NC_011462.1chromosome1	85	40	6	0	35	74	6068249	6068210	0.019	46	81	M
s_1_1_contig69272	gi|224381666|ref|NC_011462.1chromosome1	74.28	3456	593	56	95	3429	6076599	6073319	0	2239	1	S
s_1_1_contig144001	gi|224381666|ref|NC_011462.1chromosome1	80.02	1221	193	26	770	1974	6076611	6077796	0	1031	5	S
s_1_1_contig72808	gi|224381666|ref|NC_011462.1chromosome1	75.41	1846	355	33	1196	2998	6083742	6081953	0	1223	5	S
s_1_1_contig8034	gi|224381666|ref|NC_011462.1chromosome1	72.16	3164	574	53	1173	4233	6086418	6089377	0	1772	6	S
s_1_1_contig78788	gi|224381666|ref|NC_011462.1chromosome1	77.01	1766	304	40	6917	8629	6103820	6102104	0	1267	6	S
s_1_1_contig274345	gi|224381666|ref|NC_011462.1chromosome1	94.74	38	2	0	1	38	6108373	6108410	6e-07	61	2475	M
s_1_1_contig135490	gi|224381666|ref|NC_011462.1chromosome1	72.63	2598	498	60	475	2958	6116048	6113550	0	1402	12	M
s_1_1_contig55174	gi|224381666|ref|NC_011462.1chromosome1	75.32	1957	363	32	2245	4132	6119009	6120914	0	1315	2	S
s_1_1_contig239982	gi|224381666|ref|NC_011462.1chromosome1	82.58	838	130	8	365	1193	6121475	6122305	0	832	1	S
s_1_1_contig65559	gi|224381666|ref|NC_011462.1chromosome1	74.6	5720	966	108	5982	11414	6135722	6130203	0	3718	8	S
s_1_1_contig104200	gi|224381666|ref|NC_011462.1chromosome1	75.18	3271	572	62	2882	6071	6144291	6147402	0	2176	47	M
s_1_1_contig33314	gi|224381666|ref|NC_011462.1chromosome1	78.02	587	96	7	22	576	6149459	6148874	8e-132	475	2	S
s_1_1_contig87568	gi|224381666|ref|NC_011462.1chromosome1	79.03	3887	614	62	1	3819	6149385	6153138	0	3238	4	S
s_1_1_contig220837	gi|224381666|ref|NC_011462.1chromosome1	76.54	1249	237	21	24	1265	6160973	6162172	0	888	1	S
s_1_1_contig269783	gi|224381666|ref|NC_011462.1chromosome1	77.33	1698	297	25	24	1675	6163849	6162194	0	1294	1	S
s_1_1_contig103253	gi|224381666|ref|NC_011462.1chromosome1	79.53	1495	245	22	33	1489	6167541	6166070	0	1272	3	S
s_1_1_contig162191	gi|224381666|ref|NC_011462.1chromosome1	75.43	2955	518	41	31	2844	6170425	6167538	0	2058	1	S
s_1_1_contig60821	gi|224381666|ref|NC_011462.1chromosome1	75.62	5037	861	93	5642	10548	6176120	6171321	0	3460	6	S
s_1_1_contig132485	gi|224381666|ref|NC_011462.1chromosome1	74.37	2384	453	35	139	2490	6185310	6187567	0	1530	4	S
s_1_1_contig167023	gi|224381666|ref|NC_011462.1chromosome1	75.61	1636	313	30	741	2344	6195142	6196723	0	1094	3	S
s_1_1_contig127906	gi|224381666|ref|NC_011462.1chromosome1	77.88	972	161	9	1903	2873	6200392	6201310	0	792	4	S
s_1_1_contig172709	gi|224381666|ref|NC_011462.1chromosome1	80.69	1160	189	9	852	1986	6207125	6205976	0	1074	438	M
s_1_1_contig217290	gi|224381666|ref|NC_011462.1chromosome1	67.67	1887	360	54	1319	3116	6204252	6205977	1e-179	636	2	S
s_1_1_contig132178	gi|224381666|ref|NC_011462.1chromosome1	76.02	1964	354	33	2401	4293	6209503	6207586	0	1375	5	M
s_1_1_contig143845	gi|224381666|ref|NC_011462.1chromosome1	77.06	1574	274	30	1835	3348	6212861	6214407	0	1155	2	S
s_1_1_contig179138	gi|224381666|ref|NC_011462.1chromosome1	73.23	1935	399	35	10	1859	6214596	6216496	0	1104	2	S
s_1_1_contig247235	gi|224381666|ref|NC_011462.1chromosome1	90.7	86	8	0	1	86	6219528	6219443	5e-25	120	4042	M
s_1_1_contig275528	gi|224381666|ref|NC_011462.1chromosome1	79.26	270	51	5	526	792	6219537	6219804	2e-54	217	6	M
s_1_1_contig115770	gi|224381666|ref|NC_011462.1chromosome1	79.81	421	77	8	3309	3725	6219556	6219972	1e-92	347	756	M
s_1_1_contig278706	gi|224381666|ref|NC_011462.1chromosome1	72.14	402	61	5	283	634	6219573	6219973	3e-62	244	1	S
s_1_1_contig210899	gi|224381666|ref|NC_011462.1chromosome1	76.41	585	106	12	1	579	6219416	6219974	7e-112	408	993	M
s_1_1_contig138586	gi|224381666|ref|NC_011462.1chromosome1	72.98	2457	468	44	1	2353	6218041	6220405	0	1416	1905	M
s_1_1_contig172578	gi|224381666|ref|NC_011462.1chromosome1	66.64	1244	243	31	18	1143	6220417	6221606	1e-105	389	1	S
s_1_1_contig166661	gi|224381666|ref|NC_011462.1chromosome1	73.67	1014	179	21	1499	2486	6222584	6223535	8e-172	610	9	M
s_1_1_contig127385	gi|224381666|ref|NC_011462.1chromosome1	74.75	2166	374	50	121	2169	6226267	6228376	0	1371	4	M
s_1_1_contig89788	gi|224381666|ref|NC_011462.1chromosome1	78.68	136	26	2	3320	3452	6229993	6229858	8e-21	109	3629	M
s_1_1_contig160588	gi|224381666|ref|NC_011462.1chromosome1	76.7	880	138	20	3474	4331	6231343	6230509	5e-179	634	5	S
s_1_1_contig161331	gi|224381666|ref|NC_011462.1chromosome1	78.63	2110	338	41	550	2631	6239556	6241580	0	1689	1	S
s_1_1_contig155012	gi|224381666|ref|NC_011462.1chromosome1	76.46	2706	499	49	365	3015	6244698	6242076	0	1912	1	S
s_1_1_contig267231	gi|224381666|ref|NC_011462.1chromosome1	82.14	487	77	7	1395	1872	6245175	6244690	3e-128	464	3	S
s_1_1_contig160681	gi|224381666|ref|NC_011462.1chromosome1	74.87	3199	549	59	107	3229	6249199	6246180	0	2109	1	S
s_1_1_contig189887	gi|224381666|ref|NC_011462.1chromosome1	73.42	1294	251	25	25	1279	6249208	6250447	0	755	3	S
s_1_1_contig131994	gi|224381666|ref|NC_011462.1chromosome1	79.7	931	144	16	1954	2867	6255367	6254465	0	796	54	M
s_1_1_contig10956	gi|224381666|ref|NC_011462.1chromosome1	75.52	2717	517	49	1	2659	6259332	6256706	0	1815	1	S
s_1_1_contig55277	gi|224381666|ref|NC_011462.1chromosome1	77.19	1806	333	22	903	2692	6266170	6264428	0	1371	2843	M
s_1_1_contig262083	gi|224381666|ref|NC_011462.1chromosome1	76.78	2145	370	48	1311	3407	6267834	6269898	0	1523	2	S
s_1_1_contig129597	gi|224381666|ref|NC_011462.1chromosome1	76.68	2474	436	45	198	2645	6273687	6271329	0	1784	2	S
s_1_1_contig79895	gi|224381666|ref|NC_011462.1chromosome1	76.37	2848	438	64	284	3055	6274813	6277501	0	2026	7	S
s_1_1_contig40504	gi|224381666|ref|NC_011462.1chromosome1	75.58	86	20	1	848	933	6277759	6277675	6e-06	57	50	M
s_1_1_contig94917	gi|224381666|ref|NC_011462.1chromosome1	74.12	541	92	11	1406	1908	6288193	6288723	4e-90	338	2	S
s_1_1_contig158576	gi|224381666|ref|NC_011462.1chromosome1	78.22	2388	388	40	2870	5218	6291143	6288849	0	1902	6	M
s_1_1_contig228527	gi|224381666|ref|NC_011462.1chromosome1	91.18	34	3	0	145	178	6289302	6289269	0.002	48	23	M
s_1_1_contig267241	gi|224381666|ref|NC_011462.1chromosome1	81.55	840	132	8	440	1269	6294214	6293388	0	801	1	S
s_1_1_contig160664	gi|224381666|ref|NC_011462.1chromosome1	75.51	3271	541	67	24	3199	6301268	6298163	0	2221	3	S
s_1_1_contig127411	gi|224381666|ref|NC_011462.1chromosome1	79.16	1094	180	22	187	1261	6302335	6301271	0	890	1	S
s_1_1_contig117386	gi|224381666|ref|NC_011462.1chromosome1	77.8	3342	529	57	3953	7215	6307595	6310802	0	2617	2	S
s_1_1_contig234587	gi|224381666|ref|NC_011462.1chromosome1	79.38	97	19	1	1281	1376	6313924	6313828	5e-13	82	111	M
s_1_1_contig51540	gi|224381666|ref|NC_011462.1chromosome1	77.89	2067	344	26	3540	5524	6319940	6317905	0	1653	6	S
s_1_1_contig217942	gi|224381666|ref|NC_011462.1chromosome1	70.44	1918	385	48	79	1904	6322977	6324804	0	850	1	S
s_1_1_contig234483	gi|224381666|ref|NC_011462.1chromosome1	77	848	141	20	126	947	6325663	6324844	4e-172	609	1	S
s_1_1_contig165871	gi|224381666|ref|NC_011462.1chromosome1	77.58	223	38	3	997	1216	6325671	6325884	6e-41	174	7	M
s_1_1_contig194995	gi|224381666|ref|NC_011462.1chromosome1	75.59	2970	576	50	2669	5585	6328391	6331264	0	1997	4	S
s_1_1_contig170406	gi|224381666|ref|NC_011462.1chromosome1	70.04	1926	393	38	130	1973	6333933	6332110	0	866	1	S
s_1_1_contig30855	gi|224381666|ref|NC_011462.1chromosome1	68.51	794	174	17	314	1063	6333247	6332486	6e-78	297	1	S
s_1_1_contig94500	gi|224381666|ref|NC_011462.1chromosome1	71.12	2663	500	55	735	3305	6334726	6337211	0	1330	3	S
s_1_1_contig102977	gi|224381666|ref|NC_011462.1chromosome1	76.85	1719	316	27	1753	3446	6341952	6340291	0	1258	3	S
s_1_1_contig62661	gi|224381666|ref|NC_011462.1chromosome1	77.18	1056	174	19	27	1059	6346714	6345703	0	792	4	M
s_1_1_contig187990	gi|224381666|ref|NC_011462.1chromosome1	76.12	1089	174	20	1	1065	6347903	6346877	0	780	1	S
s_1_1_contig144546	gi|224381666|ref|NC_011462.1chromosome1	78.57	2086	337	41	13	2060	6349963	6347950	0	1662	1	S
s_1_1_contig239901	gi|224381666|ref|NC_011462.1chromosome1	85.25	61	8	1	903	962	6350800	6350740	1e-08	66	1183	M
s_1_1_contig84657	gi|224381666|ref|NC_011462.1chromosome1	74.8	2948	564	47	3483	6380	6353626	6350808	0	1916	5	S
s_1_1_contig195222	gi|224381666|ref|NC_011462.1chromosome1	70.78	2310	439	62	124	2363	6358967	6356824	0	1056	1	S
s_1_1_contig135749	gi|224381666|ref|NC_011462.1chromosome1	78.28	3172	506	51	80	3197	6361719	6364761	0	2549	1	S
s_1_1_contig193097	gi|224381666|ref|NC_011462.1chromosome1	77.2	535	98	9	47	571	6372440	6372960	3e-108	396	1	S
s_1_1_contig97068	gi|224381666|ref|NC_011462.1chromosome1	72.82	2355	426	57	363	2629	6373524	6375752	0	1297	1	S
s_1_1_contig183123	gi|224381666|ref|NC_011462.1chromosome1	72.13	1317	279	31	22	1298	6375900	6377168	0	661	1	S
s_1_1_contig171422	gi|224381666|ref|NC_011462.1chromosome1	71.52	1078	175	27	37	1082	6377200	6378177	8e-157	558	1	S
s_1_1_contig198378	gi|224381666|ref|NC_011462.1chromosome1	72.94	1722	303	38	1	1655	6378161	6379786	0	980	1	S
s_1_1_contig267015	gi|224381666|ref|NC_011462.1chromosome1	72.28	2294	420	62	94	2259	6380082	6382287	0	1186	1	S
s_1_1_contig58422	gi|224381666|ref|NC_011462.1chromosome1	73.44	1186	208	31	1	1141	6384157	6383034	0	675	1	S
s_1_1_contig23206	gi|224381666|ref|NC_011462.1chromosome1	70.45	1188	209	26	783	1859	6385243	6384087	2e-160	571	1	S
s_1_1_contig225684	gi|224381666|ref|NC_011462.1chromosome1	77.99	1122	200	24	3130	4230	6387127	6386032	0	845	4	S
s_1_1_contig192443	gi|224381666|ref|NC_011462.1chromosome1	82.73	747	96	9	18	760	6389673	6390390	0	755	1	S
s_1_1_contig14442	gi|224381666|ref|NC_011462.1chromosome1	77.58	785	149	14	41	810	6390604	6391376	1e-164	583	1	S
s_1_1_contig120954	gi|224381666|ref|NC_011462.1chromosome1	72.15	2625	456	64	734	3230	6394423	6391946	0	1398	5	M
s_1_1_contig106069	gi|224381666|ref|NC_011462.1chromosome1	72.42	1552	316	29	313	1844	6397637	6396178	0	839	313	M
s_1_1_contig71071	gi|224381666|ref|NC_011462.1chromosome1	70.71	3080	588	79	4260	7214	6400584	6397694	0	1415	10	M
s_1_1_contig111197	gi|224381666|ref|NC_011462.1chromosome1	72.24	3552	699	73	177	3591	6403481	6406882	0	1891	6	S
s_1_1_contig101944	gi|224381666|ref|NC_011462.1chromosome1	77.52	903	167	14	1921	2799	6413980	6413090	0	682	3	S
s_1_1_contig12166	gi|224381666|ref|NC_011462.1chromosome1	71.54	2864	532	70	257	3024	6416377	6419053	0	1431	1	S
s_1_1_contig134841	gi|224381666|ref|NC_011462.1chromosome1	71.24	1926	343	48	4192	5957	6423462	6421588	0	949	89	M
s_1_1_contig113972	gi|224381666|ref|NC_011462.1chromosome1	86.25	80	10	1	1	79	6423567	6423646	1e-15	92	2413	M
s_1_1_contig258542	gi|224381666|ref|NC_011462.1chromosome1	80.62	129	24	1	278	405	6426047	6425919	3e-24	116	4593	M
s_1_1_contig269151	gi|224381666|ref|NC_011462.1chromosome1	83.51	97	15	1	950	1045	6426047	6425951	6e-19	100	28247	M
s_1_1_contig278062	gi|224381666|ref|NC_011462.1chromosome1	86.32	95	12	1	796	889	6426048	6425954	1e-21	109	5625	M
s_1_1_contig255158	gi|224381666|ref|NC_011462.1chromosome1	85.23	88	12	1	392	478	6426048	6425961	3e-18	97	15170	M
s_1_1_contig282718	gi|224381666|ref|NC_011462.1chromosome1	86.67	75	9	1	365	438	6426048	6425974	2e-15	88	7017	M
s_1_1_contig171944	gi|224381666|ref|NC_011462.1chromosome1	90.28	72	6	1	1721	1791	6426047	6425976	4e-17	95	6188	M
s_1_1_contig200671	gi|224381666|ref|NC_011462.1chromosome1	82.19	146	24	2	198	342	6425908	6426052	4e-31	140	52	M
s_1_1_contig198728	gi|224381666|ref|NC_011462.1chromosome1	90.24	41	3	1	1495	1534	6439500	6439540	0.0001	54	367	M
s_1_1_contig82105	gi|224381666|ref|NC_011462.1chromosome1	71.72	5353	982	146	1811	6957	6447071	6442045	0	2650	7	S
s_1_1_contig265411	gi|224381666|ref|NC_011462.1chromosome1	74.65	2888	540	59	1	2804	6452065	6449286	0	1815	1	S
s_1_1_contig175325	gi|224381666|ref|NC_011462.1chromosome1	72.28	2345	475	56	1135	3399	6454955	6452706	0	1204	1	S
s_1_1_contig247498	gi|224381666|ref|NC_011462.1chromosome1	72.29	765	98	23	25	771	6452046	6452714	3e-116	423	1	S
s_1_1_contig280794	gi|224381666|ref|NC_011462.1chromosome1	69.21	367	72	15	82	421	6457047	6456695	9e-26	122	15323	M
s_1_1_contig261873	gi|224381666|ref|NC_011462.1chromosome1	84.27	693	88	7	2	677	6460271	6459583	0	746	2	S
s_1_1_contig150544	gi|224381666|ref|NC_011462.1chromosome1	73.6	1299	261	29	19	1279	6460186	6461440	0	740	29	M
s_1_1_contig128463	gi|224381666|ref|NC_011462.1chromosome1	75.79	1549	295	17	1876	3385	6464784	6466291	0	1099	2	S
s_1_1_contig135622	gi|224381666|ref|NC_011462.1chromosome1	70.95	1573	312	35	5	1524	6467814	6466334	0	749	1	S
s_1_1_contig182887	gi|224381666|ref|NC_011462.1chromosome1	70.2	1074	201	26	150	1194	6468583	6469566	2e-134	484	1	S
s_1_1_contig97612	gi|224381666|ref|NC_011462.1chromosome1	76.12	335	72	7	1	330	6469612	6469943	4e-54	219	1	S
s_1_1_contig44215	gi|224381666|ref|NC_011462.1chromosome1	73.45	275	45	8	26	279	6473335	6473068	5e-36	156	1	S
s_1_1_contig54045	gi|224381666|ref|NC_011462.1chromosome1	77.13	2689	427	50	1	2635	6473309	6475863	0	2021	1	S
s_1_1_contig202463	gi|224381666|ref|NC_011462.1chromosome1	71.43	483	90	13	2	457	6476849	6477310	5e-59	233	1	S
s_1_1_contig161905	gi|224381666|ref|NC_011462.1chromosome1	73.75	2522	413	57	1	2444	6478184	6480534	0	1532	1	S
s_1_1_contig28414	gi|224381666|ref|NC_011462.1chromosome1	72.38	1984	365	52	1	1895	6482940	6481051	0	1038	1	S
s_1_1_contig26371	gi|224381666|ref|NC_011462.1chromosome1	76.57	1861	268	32	5	1813	6482964	6484708	0	1398	1	S
s_1_1_contig93217	gi|224381666|ref|NC_011462.1chromosome1	70.74	1186	222	35	1789	2931	6485309	6486412	1e-147	529	3	S
s_1_1_contig176626	gi|224381666|ref|NC_011462.1chromosome1	87.5	40	5	0	212	251	6486957	6486996	0.001	50	81	M
s_1_1_contig204273	gi|224381666|ref|NC_011462.1chromosome1	74.03	1898	310	44	703	2545	6489812	6488043	0	1168	1	S
s_1_1_contig240433	gi|224381666|ref|NC_011462.1chromosome1	78.77	570	81	11	114	666	6490358	6490904	3e-130	470	1	S
s_1_1_contig73498	gi|224381666|ref|NC_011462.1chromosome1	73.42	6615	1131	154	2300	8644	6494726	6500983	0	3874	3	S
s_1_1_contig193533	gi|224381666|ref|NC_011462.1chromosome1	72.4	1942	320	51	1	1831	6504503	6506339	0	1050	3	S
s_1_1_contig5230	gi|224381666|ref|NC_011462.1chromosome1	76.18	1436	240	29	1	1410	6511228	6512587	0	1009	1	S
s_1_1_contig60480	gi|224381666|ref|NC_011462.1chromosome1	74.52	3316	619	87	6031	9252	6517589	6520772	0	1983	348	M
s_1_1_contig139627	gi|224381666|ref|NC_011462.1chromosome1	76.5	3689	610	76	105	3685	6521789	6525328	0	2634	2	S
s_1_1_contig122552	gi|224381666|ref|NC_011462.1chromosome1	70.85	2017	351	53	3995	5889	6529040	6530941	0	962	4	S
s_1_1_contig265875	gi|224381666|ref|NC_011462.1chromosome1	86.24	218	27	3	473	689	6531545	6531330	3e-63	248	1	S
s_1_1_contig35447	gi|224381666|ref|NC_011462.1chromosome1	78.63	131	18	6	70	193	6531834	6531707	8e-17	93	137	M
s_1_1_contig264822	gi|224381666|ref|NC_011462.1chromosome1	77.62	1041	126	18	36	1041	6532828	6531860	0	843	1	S
s_1_1_contig162540	gi|224381666|ref|NC_011462.1chromosome1	77.58	2524	415	48	28	2499	6535274	6532850	0	1920	1	S
s_1_1_contig133967	gi|224381666|ref|NC_011462.1chromosome1	78.94	2051	277	35	1660	3634	6537032	6539003	0	1734	2	S
s_1_1_contig71466	gi|224381666|ref|NC_011462.1chromosome1	75.25	2941	545	63	2351	5198	6544158	6541308	0	1903	4	S
s_1_1_contig73861	gi|224381666|ref|NC_011462.1chromosome1	83.22	1365	168	17	2146	3493	6548972	6547652	0	1407	2	S
s_1_1_contig132106	gi|224381666|ref|NC_011462.1chromosome1	72.85	2781	480	60	1144	3825	6553948	6551344	0	1590	40	M
s_1_1_contig165350	gi|224381666|ref|NC_011462.1chromosome1	87.93	1815	161	16	3420	5202	6558134	6559922	0	2266	3	S
s_1_1_contig53699	gi|224381666|ref|NC_011462.1chromosome1	81.66	758	98	10	1	747	6559896	6560623	0	733	2	M
s_1_1_contig124639	gi|224381666|ref|NC_011462.1chromosome1	76.48	2734	412	71	80	2713	6560649	6563251	0	1920	2	M
s_1_1_contig274767	gi|224381666|ref|NC_011462.1chromosome1	77.13	223	49	1	361	583	6570227	6570007	2e-40	170	401	M
s_1_1_contig110677	gi|224381666|ref|NC_011462.1chromosome1	70.63	698	136	17	1937	2597	6571308	6571973	1e-84	320	2	S
s_1_1_contig156101	gi|224381666|ref|NC_011462.1chromosome1	77.4	969	150	18	1555	2514	6573490	6574398	0	742	3	S
s_1_1_contig69360	gi|224381666|ref|NC_011462.1chromosome1	75.47	5434	908	110	6541	11833	6583673	6578524	0	3678	7	S
s_1_1_contig112049	gi|224381666|ref|NC_011462.1chromosome1	75.7	3444	555	73	315	3623	6597976	6594680	0	2363	2	S
s_1_1_contig26748	gi|224381666|ref|NC_011462.1chromosome1	78.63	117	19	2	240	356	6602446	6602336	2e-17	95	41	M
s_1_1_contig69458	gi|224381666|ref|NC_011462.1chromosome1	70.63	6133	1153	173	515	6466	6608281	6602616	0	2746	3	S
s_1_1_contig9085	gi|224381666|ref|NC_011462.1chromosome1	81.66	725	101	19	3	717	6610027	6609325	0	652	1	S
s_1_1_contig101658	gi|224381666|ref|NC_011462.1chromosome1	91.71	2882	156	26	6782	9659	6612818	6610016	0	4078	3	S
s_1_1_contig112784	gi|224381666|ref|NC_011462.1chromosome1	70.24	793	160	26	1265	2037	6622385	6621649	4e-84	318	3	S
s_1_1_contig229241	gi|224381666|ref|NC_011462.1chromosome1	71.55	921	184	27	220	1127	6623886	6624741	3e-117	428	1	S
s_1_1_contig133949	gi|224381666|ref|NC_011462.1chromosome1	68.62	972	185	24	1419	2371	6627569	6626699	6e-102	378	4	S
s_1_1_contig194183	gi|224381666|ref|NC_011462.1chromosome1	72.3	473	74	8	4	422	6627951	6628420	1e-72	279	2	S
s_1_1_contig84264	gi|224381666|ref|NC_011462.1chromosome1	74.83	2328	389	41	1	2245	6636228	6634015	0	1550	3	S
s_1_1_contig67385	gi|224381666|ref|NC_011462.1chromosome1	76	6371	1059	117	6	6209	6636218	6642285	0	4493	4	S
s_1_1_contig206970	gi|224381666|ref|NC_011462.1chromosome1	96.15	26	1	0	118	143	6644173	6644198	0.075	43	3	M
s_1_1_contig8071	gi|224381666|ref|NC_011462.1chromosome1	73.09	1947	298	50	1854	3765	6650667	6648912	0	1128	3	S
s_1_1_contig34705	gi|224381666|ref|NC_011462.1chromosome1	71.14	402	85	13	257	653	6651045	6650670	1e-40	172	31	M
s_1_1_contig256791	gi|224381666|ref|NC_011462.1chromosome1	69.96	263	65	7	283	542	6650694	6650945	4e-19	100	1527	M
s_1_1_contig71742	gi|224381666|ref|NC_011462.1chromosome1	86.54	52	7	0	62	113	6650972	6651023	9e-07	63	182	M
s_1_1_contig277180	gi|224381666|ref|NC_011462.1chromosome1	69.58	332	74	9	1572	1898	6650866	6651175	1e-26	127	601	M
s_1_1_contig63411	gi|224381666|ref|NC_011462.1chromosome1	79.78	2799	425	56	13451	16172	6666961	6669695	0	2370	5	S
s_1_1_contig156725	gi|224381666|ref|NC_011462.1chromosome1	97.37	1064	19	3	1	1057	6669787	6670848	0	1788	1	S
s_1_1_contig55466	gi|224381666|ref|NC_011462.1chromosome1	84.51	1478	158	20	3	1456	6670849	6672279	0	1608	1	S
s_1_1_contig59345	gi|224381666|ref|NC_011462.1chromosome1	75.44	3868	657	84	3341	7074	6676828	6680536	0	2578	6	S
s_1_1_contig93613	gi|224381666|ref|NC_011462.1chromosome1	74.67	3517	626	75	2890	6299	6688499	6685141	0	2226	749	M
s_1_1_contig138612	gi|224381666|ref|NC_011462.1chromosome1	73.68	2044	436	30	1	1990	6696715	6694720	0	1218	1	S
s_1_1_contig18381	gi|224381666|ref|NC_011462.1chromosome1	75.04	597	101	13	520	1105	6697256	6696697	2e-106	390	1	S
s_1_1_contig5507	gi|224381666|ref|NC_011462.1chromosome1	79.37	63	9	1	60	118	6697331	6697269	2e-05	55	59	M
s_1_1_contig25925	gi|224381666|ref|NC_011462.1chromosome1	84.6	487	64	6	6	490	6698318	6697841	3e-146	524	23	M
s_1_1_contig203250	gi|224381666|ref|NC_011462.1chromosome1	74.11	533	96	15	28	550	6698695	6699195	7e-82	309	1	S
s_1_1_contig250434	gi|224381666|ref|NC_011462.1chromosome1	73.61	269	63	3	168	430	6699223	6699489	3e-37	159	1	S
s_1_1_contig135417	gi|224381666|ref|NC_011462.1chromosome1	71.58	1654	304	37	93	1649	6704152	6702568	0	847	2	S
s_1_1_contig156382	gi|224381666|ref|NC_011462.1chromosome1	79.57	1429	170	28	106	1450	6707081	6705691	0	1245	1	S
s_1_1_contig38326	gi|224381666|ref|NC_011462.1chromosome1	84.71	811	76	8	530	1304	6707877	6707079	0	911	2	S
s_1_1_contig47250	gi|224381666|ref|NC_011462.1chromosome1	78.98	333	53	6	436	764	6711527	6711208	3e-71	273	114	M
s_1_1_contig256535	gi|224381666|ref|NC_011462.1chromosome1	73.56	261	55	6	194	443	6711485	6711228	6e-33	145	6	M
s_1_1_contig282348	gi|224381666|ref|NC_011462.1chromosome1	78.41	176	29	2	376	542	6711452	6711277	8e-33	145	31	M
s_1_1_contig62095	gi|224381666|ref|NC_011462.1chromosome1	72.22	2034	390	46	2202	4138	6713544	6711589	0	1072	6	S
s_1_1_contig271670	gi|224381666|ref|NC_011462.1chromosome1	68.44	770	128	24	1	706	6717226	6716508	4e-76	289	2	S
s_1_1_contig75955	gi|224381666|ref|NC_011462.1chromosome1	73.68	1748	333	36	1	1725	6731904	6730261	0	1031	6	S
s_1_1_contig38636	gi|224381666|ref|NC_011462.1chromosome1	73.08	546	109	12	4	517	6731837	6732376	5e-80	302	1	S
s_1_1_contig90200	gi|224381666|ref|NC_011462.1chromosome1	70.55	6529	1185	145	705	6897	6738551	6732425	0	3117	2	S
s_1_1_contig22293	gi|224381666|ref|NC_011462.1chromosome1	70.05	2177	408	53	1154	3261	6740409	6742410	0	967	4	S
s_1_1_contig280927	gi|224381666|ref|NC_011462.1chromosome1	73.14	376	68	8	14	387	6743616	6743272	2e-54	217	1	S
s_1_1_contig44365	gi|224381666|ref|NC_011462.1chromosome1	84.62	52	6	2	339	390	6743259	6743308	0.0002	52	110	M
s_1_1_contig9378	gi|224381666|ref|NC_011462.1chromosome1	79.21	1501	212	23	2193	3674	6745047	6743628	0	1287	33	M
s_1_1_contig167242	gi|224381666|ref|NC_011462.1chromosome1	81.38	145	23	2	451	594	6747050	6747191	1e-28	134	1	S
s_1_1_contig193761	gi|224381666|ref|NC_011462.1chromosome1	72.52	1139	214	13	33	1143	6747811	6748878	0	673	1	S
s_1_1_contig197983	gi|224381666|ref|NC_011462.1chromosome1	74.6	1437	256	28	84	1475	6749251	6750623	0	919	2	S
s_1_1_contig112181	gi|224381666|ref|NC_011462.1chromosome1	72.38	2947	533	73	17	2796	6756052	6753220	0	1570	1	S
s_1_1_contig143100	gi|224381666|ref|NC_011462.1chromosome1	70.97	868	159	19	8	811	6756063	6756901	2e-117	428	3	S
s_1_1_contig274288	gi|224381666|ref|NC_011462.1chromosome1	76.52	792	132	17	7	785	6759603	6760353	5e-158	562	1	S
s_1_1_contig236795	gi|224381666|ref|NC_011462.1chromosome1	95.24	42	2	0	897	938	6764509	6764550	3e-09	68	1120	M
[truncated: 281,516+ more rows]
