# Supplementary material for: A Multi-Platform Draft de novo Genome Assembly and Comparative Analysis for the Scarlet Macaw (Ara macao)
Source: PLoS One. 2013 May 8;8(5):e62415. doi: 10.1371/journal.pone.0062415 (PMC3648530; doi:10.1371/journal.pone.0062415)
Supplement: Table S5 — Summary of the scaffolded de novo scarlet macaw comparative genome alignments using blastn. (XLSX) [file pone.0062415.s006.xlsx]

## Sheet: SMACv1.1_ScaffoldedvsChicken
Query	Hit/Subject Chromosome (Chicken; Gallus gallus 4.0)	% Identity	Align Length	Mismatches	Gaps	q-start	q-end	hit-start	hit-end	evalue	bitscore	Total hits	Single or Multi Chromosome
SMAC_Scaffolded_contig_71514	gi|358485511|ref|NC_006088.3|GGA1	70.96	637	132	16	8871	9472	35744	36362	2e-75	291	6670	M
SMAC_Scaffolded_contig_31904	gi|358485511|ref|NC_006088.3|GGA1	69.34	1145	248	26	283	1406	43786	44848	5e-126	459	1867	M
SMAC_Scaffolded_contig_169517	gi|358485511|ref|NC_006088.3|GGA1	82.35	221	39	0	4747	4967	52053	51833	4e-55	223	1	S
SMAC_Scaffolded_contig_106119	gi|358485511|ref|NC_006088.3|GGA1	79.28	473	74	5	1358	1816	53806	53344	5e-112	410	5	M
SMAC_Scaffolded_contig_161624	gi|358485511|ref|NC_006088.3|GGA1	72.14	201	44	4	211	409	54000	54190	3e-20	104	28	M
SMAC_Scaffolded_contig_39677	gi|358485511|ref|NC_006088.3|GGA1	80.59	5770	1005	33	6213	11946	56689	62379	0	5312	25	M
SMAC_Scaffolded_contig_178830	gi|358485511|ref|NC_006088.3|GGA1	79.31	58	9	2	470	527	72453	72507	0.041	44	60	M
SMAC_Scaffolded_contig_60143	gi|358485511|ref|NC_006088.3|GGA1	72.69	1278	267	34	1167	2402	74810	73573	0	652	29491	M
SMAC_Scaffolded_contig_73052	gi|358485511|ref|NC_006088.3|GGA1	87.27	110	14	0	4305	4414	80383	80492	4e-29	136	2	S
SMAC_Scaffolded_contig_147933	gi|358485511|ref|NC_006088.3|GGA1	86.36	44	3	2	93	134	83913	83871	0.006	46	34	M
SMAC_Scaffolded_contig_58471	gi|358485511|ref|NC_006088.3|GGA1	69.77	774	184	18	1	744	88201	87448	2e-80	306	213	M
SMAC_Scaffolded_contig_123322	gi|358485511|ref|NC_006088.3|GGA1	77.42	93	21	0	1141	1233	94436	94528	1e-10	73	44	M
SMAC_Scaffolded_contig_89941	gi|358485511|ref|NC_006088.3|GGA1	89.39	66	7	0	421	486	101791	101856	2e-15	87	34779	M
SMAC_Scaffolded_contig_13430	gi|358485511|ref|NC_006088.3|GGA1	69.49	1757	338	48	12666	14318	110581	108919	0	715	73	M
SMAC_Scaffolded_contig_73879	gi|358485511|ref|NC_006088.3|GGA1	73.01	704	149	20	2410	3103	111054	111726	3e-96	360	1405	M
SMAC_Scaffolded_contig_28627	gi|358485511|ref|NC_006088.3|GGA1	81.82	132	24	0	2007	2138	112245	112114	3e-27	131	2	S
SMAC_Scaffolded_contig_84491	gi|358485511|ref|NC_006088.3|GGA1	74.21	221	54	1	944	1164	113267	113484	1e-30	140	1	S
SMAC_Scaffolded_contig_128492	gi|358485511|ref|NC_006088.3|GGA1	77.24	123	28	0	4935	5057	122838	122960	4e-17	96	24	M
SMAC_Scaffolded_contig_15223	gi|358485511|ref|NC_006088.3|GGA1	80.41	194	32	3	1224	1414	138006	137816	7e-40	170	1	S
SMAC_Scaffolded_contig_21410	gi|358485511|ref|NC_006088.3|GGA1	77.91	86	17	2	3530	3613	143219	143304	6e-07	62	110	M
SMAC_Scaffolded_contig_96945	gi|358485511|ref|NC_006088.3|GGA1	77.05	61	14	0	624	684	143301	143241	0.002	48	43	M
SMAC_Scaffolded_contig_171898	gi|358485511|ref|NC_006088.3|GGA1	92.86	28	2	0	101	128	145791	145764	0.08	42	26	M
SMAC_Scaffolded_contig_109490	gi|358485511|ref|NC_006088.3|GGA1	70.41	419	83	9	367	758	150356	149952	6e-47	194	1	S
SMAC_Scaffolded_contig_141913	gi|358485511|ref|NC_006088.3|GGA1	81.87	182	32	1	352	533	151841	152021	9e-42	176	1	S
SMAC_Scaffolded_contig_73138	gi|358485511|ref|NC_006088.3|GGA1	80.95	105	17	2	3079	3180	155254	155150	7e-16	93	157	M
SMAC_Scaffolded_contig_16399	gi|358485511|ref|NC_006088.3|GGA1	72.79	136	34	2	1237	1371	159859	159992	1e-10	73	1240	M
SMAC_Scaffolded_contig_70629	gi|358485511|ref|NC_006088.3|GGA1	71.47	354	73	9	224	552	160967	161317	1e-39	168	1	S
SMAC_Scaffolded_contig_24662	gi|358485511|ref|NC_006088.3|GGA1	73.26	288	62	3	332	619	163298	163570	2e-40	172	1	S
SMAC_Scaffolded_contig_106917	gi|358485511|ref|NC_006088.3|GGA1	68.24	318	88	5	1450	1755	166624	166308	2e-20	107	7354	M
SMAC_Scaffolded_contig_99971	gi|358485511|ref|NC_006088.3|GGA1	71.23	650	134	14	1780	2404	174891	175512	4e-83	315	119	M
SMAC_Scaffolded_contig_57756	gi|358485511|ref|NC_006088.3|GGA1	75.06	429	74	7	489	913	177666	177267	1e-75	289	852	M
SMAC_Scaffolded_contig_45382	gi|358485511|ref|NC_006088.3|GGA1	74.69	561	96	13	4298	4840	180438	179906	1e-94	354	3	S
SMAC_Scaffolded_contig_23231	gi|358485511|ref|NC_006088.3|GGA1	71.48	298	55	6	2967	3249	185329	185047	1e-34	154	2	S
SMAC_Scaffolded_contig_23230	gi|358485511|ref|NC_006088.3|GGA1	76.69	682	124	12	3342	3996	194364	195037	4e-136	491	3	S
SMAC_Scaffolded_contig_29560	gi|358485511|ref|NC_006088.3|GGA1	65.56	1777	452	52	467	2149	195993	197703	2e-95	356	10	M
SMAC_Scaffolded_contig_111079	gi|358485511|ref|NC_006088.3|GGA1	73.81	210	52	3	39	245	197494	197703	5e-25	120	1	S
SMAC_Scaffolded_contig_46848	gi|358485511|ref|NC_006088.3|GGA1	71.07	477	122	6	1543	2015	199029	199493	4e-56	226	1	S
SMAC_Scaffolded_contig_43163	gi|358485511|ref|NC_006088.3|GGA1	88.48	191	22	0	170	360	204646	204836	1e-62	246	2	S
SMAC_Scaffolded_contig_121078	gi|358485511|ref|NC_006088.3|GGA1	70.09	866	188	26	866	1713	218822	218010	2e-91	342	1	S
SMAC_Scaffolded_contig_46973	gi|358485511|ref|NC_006088.3|GGA1	70.64	705	149	24	56	717	219778	220467	9e-74	282	8	M
SMAC_Scaffolded_contig_89450	gi|358485511|ref|NC_006088.3|GGA1	72.96	577	125	18	1151	1714	225746	225188	4e-74	284	2	S
SMAC_Scaffolded_contig_38619	gi|358485511|ref|NC_006088.3|GGA1	66.94	856	227	17	9332	10159	227904	227077	9e-61	242	3	S
SMAC_Scaffolded_contig_107068	gi|358485511|ref|NC_006088.3|GGA1	90.53	95	9	0	764	858	237568	237474	3e-28	131	1	S
SMAC_Scaffolded_contig_6051	gi|358485511|ref|NC_006088.3|GGA1	67.41	491	127	13	1006	1472	238704	238223	1e-29	136	1	S
SMAC_Scaffolded_contig_30744	gi|358485511|ref|NC_006088.3|GGA1	71.36	433	79	15	886	1293	257355	257767	3e-47	196	1	S
SMAC_Scaffolded_contig_72910	gi|358485511|ref|NC_006088.3|GGA1	68.11	1107	269	29	1683	2737	261687	262761	7e-94	351	1	S
SMAC_Scaffolded_contig_3899	gi|358485511|ref|NC_006088.3|GGA1	77.46	346	68	3	2881	3217	267543	267887	7e-69	268	1219	M
SMAC_Scaffolded_contig_20014	gi|358485511|ref|NC_006088.3|GGA1	72.07	222	35	9	795	1016	271503	271697	4e-20	105	44	M
SMAC_Scaffolded_contig_66532	gi|358485511|ref|NC_006088.3|GGA1	72.92	421	98	9	1065	1483	273358	272952	2e-54	219	1	S
SMAC_Scaffolded_contig_29803	gi|358485511|ref|NC_006088.3|GGA1	72.1	448	86	12	916	1346	277937	277512	1e-56	226	2	S
SMAC_Scaffolded_contig_29804	gi|358485511|ref|NC_006088.3|GGA1	74.25	167	36	2	222	385	279469	279631	1e-20	105	4713	M
SMAC_Scaffolded_contig_122771	gi|358485511|ref|NC_006088.3|GGA1	76.96	395	64	7	472	866	280074	280441	3e-77	295	2	S
SMAC_Scaffolded_contig_176180	gi|358485511|ref|NC_006088.3|GGA1	74.65	71	17	1	81	151	280131	280200	0.032	44	58	M
SMAC_Scaffolded_contig_111652	gi|358485511|ref|NC_006088.3|GGA1	83.77	191	31	0	436	626	282719	282529	3e-50	205	1	S
SMAC_Scaffolded_contig_40869	gi|358485511|ref|NC_006088.3|GGA1	73.82	317	69	6	1777	2082	283655	283342	1e-43	183	58	M
SMAC_Scaffolded_contig_164808	gi|358485511|ref|NC_006088.3|GGA1	81.82	55	5	3	286	335	291859	291805	0.006	46	37	M
SMAC_Scaffolded_contig_61662	gi|358485511|ref|NC_006088.3|GGA1	74.81	262	58	6	1356	1616	293118	293372	3e-35	156	1	S
SMAC_Scaffolded_contig_61906	gi|358485511|ref|NC_006088.3|GGA1	84.24	311	34	4	379	674	300287	299977	8e-90	336	595	M
SMAC_Scaffolded_contig_53664	gi|358485511|ref|NC_006088.3|GGA1	72.64	296	69	9	3192	3480	302934	303224	3e-30	140	1	S
SMAC_Scaffolded_contig_43324	gi|358485511|ref|NC_006088.3|GGA1	66.67	216	55	4	424	630	304037	303830	3e-07	62	28	M
SMAC_Scaffolded_contig_9764	gi|358485511|ref|NC_006088.3|GGA1	86.36	66	9	0	2098	2163	306513	306578	4e-12	78	22071	M
SMAC_Scaffolded_contig_43325	gi|358485511|ref|NC_006088.3|GGA1	71.48	789	178	23	2921	3693	307577	308334	1e-92	347	6830	M
SMAC_Scaffolded_contig_23551	gi|358485511|ref|NC_006088.3|GGA1	87.13	171	19	2	899	1068	311729	311897	1e-49	203	2	S
SMAC_Scaffolded_contig_49373	gi|358485511|ref|NC_006088.3|GGA1	71.21	712	159	17	14596	15282	313374	312684	1e-85	325	388	M
SMAC_Scaffolded_contig_94000	gi|358485511|ref|NC_006088.3|GGA1	70.81	908	164	29	1683	2555	327126	326285	1e-109	403	2	S
SMAC_Scaffolded_contig_65945	gi|358485511|ref|NC_006088.3|GGA1	73.14	484	91	14	2154	2603	330202	329724	3e-66	259	47	M
SMAC_Scaffolded_contig_124212	gi|358485511|ref|NC_006088.3|GGA1	75.67	337	60	7	1442	1773	338091	337772	1e-56	226	2	S
SMAC_Scaffolded_contig_31669	gi|358485511|ref|NC_006088.3|GGA1	77.78	252	47	5	941	1186	353402	353650	1e-44	188	802	M
SMAC_Scaffolded_contig_29286	gi|358485511|ref|NC_006088.3|GGA1	83.6	250	35	3	752	998	361548	361794	8e-66	259	1774	M
SMAC_Scaffolded_contig_126532	gi|358485511|ref|NC_006088.3|GGA1	68.44	507	112	20	70	545	363258	363747	3e-45	187	144	M
SMAC_Scaffolded_contig_23350	gi|358485511|ref|NC_006088.3|GGA1	79.65	226	42	1	5654	5879	370755	370534	6e-48	199	43	M
SMAC_Scaffolded_contig_23719	gi|358485511|ref|NC_006088.3|GGA1	75.62	566	83	20	4608	5125	372134	372692	9e-96	358	1456	M
SMAC_Scaffolded_contig_7816	gi|358485511|ref|NC_006088.3|GGA1	85.14	370	44	2	410	768	379663	380032	6e-115	421	2	S
SMAC_Scaffolded_contig_91610	gi|358485511|ref|NC_006088.3|GGA1	87.8	41	3	1	230	270	385264	385302	0.001	50	55	M
SMAC_Scaffolded_contig_28242	gi|358485511|ref|NC_006088.3|GGA1	77.78	207	35	4	1548	1747	385498	385700	6e-36	158	43	M
SMAC_Scaffolded_contig_105810	gi|358485511|ref|NC_006088.3|GGA1	89.38	160	16	1	526	685	387712	387554	2e-51	208	1	S
SMAC_Scaffolded_contig_81894	gi|358485511|ref|NC_006088.3|GGA1	93.07	678	37	6	50	720	420712	421386	0	993	1	S
SMAC_Scaffolded_contig_48182	gi|358485511|ref|NC_006088.3|GGA1	81.24	533	67	12	6730	7244	422718	423235	5e-134	486	7	M
SMAC_Scaffolded_contig_6075	gi|358485511|ref|NC_006088.3|GGA1	93.1	145	9	1	7060	7203	426988	427132	3e-52	214	6	M
SMAC_Scaffolded_contig_28148	gi|358485511|ref|NC_006088.3|GGA1	70.33	391	72	18	1203	1583	428471	428115	3e-31	141	4	M
SMAC_Scaffolded_contig_92772	gi|358485511|ref|NC_006088.3|GGA1	79.88	1675	282	15	2348	3978	431236	432899	0	1483	2	S
SMAC_Scaffolded_contig_36998	gi|358485511|ref|NC_006088.3|GGA1	71.11	1066	194	29	391	1374	436497	435464	4e-140	506	2	S
SMAC_Scaffolded_contig_97115	gi|358485511|ref|NC_006088.3|GGA1	82.51	446	68	6	46	486	437189	436749	3e-120	435	1	S
SMAC_Scaffolded_contig_56054	gi|358485511|ref|NC_006088.3|GGA1	74.33	966	172	19	1656	2588	438957	439879	6e-171	607	178	M
SMAC_Scaffolded_contig_115969	gi|358485511|ref|NC_006088.3|GGA1	69.97	1828	377	51	1475	3239	441801	443519	0	747	7	M
SMAC_Scaffolded_contig_87942	gi|358485511|ref|NC_006088.3|GGA1	79.14	350	52	7	257	586	445374	445722	3e-76	289	1	S
SMAC_Scaffolded_contig_65705	gi|358485511|ref|NC_006088.3|GGA1	75.11	699	125	15	213	868	446969	447661	9e-125	453	3	S
SMAC_Scaffolded_contig_157749	gi|358485511|ref|NC_006088.3|GGA1	74.56	114	18	5	605	715	451238	451133	3e-07	62	27	M
SMAC_Scaffolded_contig_69402	gi|358485511|ref|NC_006088.3|GGA1	70.7	372	70	11	2	350	455870	455515	1e-37	165	1	S
SMAC_Scaffolded_contig_9826	gi|358485511|ref|NC_006088.3|GGA1	70.33	418	86	9	5128	5538	464808	465194	9e-45	188	2	S
SMAC_Scaffolded_contig_56202	gi|358485511|ref|NC_006088.3|GGA1	79.89	179	33	2	483	660	465742	465918	5e-35	154	7	M
SMAC_Scaffolded_contig_17221	gi|358485511|ref|NC_006088.3|GGA1	78.18	220	44	3	825	1043	474397	474613	7e-40	170	84	M
SMAC_Scaffolded_contig_77552	gi|358485511|ref|NC_006088.3|GGA1	72.81	581	103	18	3445	4015	477457	477992	1e-79	304	1032	M
SMAC_Scaffolded_contig_52192	gi|358485511|ref|NC_006088.3|GGA1	87.22	352	39	3	1583	1932	490741	490394	2e-116	425	7	M
SMAC_Scaffolded_contig_53983	gi|358485511|ref|NC_006088.3|GGA1	82.73	249	34	2	562	810	494857	494618	4e-65	255	2	S
SMAC_Scaffolded_contig_149864	gi|358485511|ref|NC_006088.3|GGA1	71.4	895	177	22	346	1210	496008	496853	1e-118	432	19	M
SMAC_Scaffolded_contig_2009	gi|358485511|ref|NC_006088.3|GGA1	86.11	216	26	3	530	744	502542	502330	9e-62	244	1073	M
SMAC_Scaffolded_contig_48196	gi|358485511|ref|NC_006088.3|GGA1	67.75	772	162	17	113	851	505021	505738	2e-70	271	1	S
SMAC_Scaffolded_contig_81353	gi|358485511|ref|NC_006088.3|GGA1	78.04	419	77	7	78	490	506446	506855	2e-86	324	13	M
SMAC_Scaffolded_contig_3264	gi|358485511|ref|NC_006088.3|GGA1	75.9	390	75	5	3243	3615	507997	508384	6e-71	275	1008	M
SMAC_Scaffolded_contig_142588	gi|358485511|ref|NC_006088.3|GGA1	81.49	335	54	3	350	680	508750	508420	1e-84	318	15431	M
SMAC_Scaffolded_contig_69757	gi|358485511|ref|NC_006088.3|GGA1	76.25	261	40	6	113	358	509582	509835	3e-44	185	1	S
SMAC_Scaffolded_contig_127418	gi|358485511|ref|NC_006088.3|GGA1	70.03	664	152	19	55	704	511679	511049	1e-65	257	2	S
SMAC_Scaffolded_contig_48177	gi|358485511|ref|NC_006088.3|GGA1	72.71	634	137	15	683	1292	512667	513288	4e-87	329	536	M
SMAC_Scaffolded_contig_110142	gi|358485511|ref|NC_006088.3|GGA1	70.33	691	167	17	672	1341	517895	517222	4e-73	280	370	M
SMAC_Scaffolded_contig_50913	gi|358485511|ref|NC_006088.3|GGA1	72.8	658	138	22	3369	4012	522122	521492	7e-84	318	4	S
SMAC_Scaffolded_contig_13456	gi|358485511|ref|NC_006088.3|GGA1	73.3	1307	237	35	2131	3370	528824	527563	0	728	3	M
SMAC_Scaffolded_contig_50423	gi|358485511|ref|NC_006088.3|GGA1	78.13	1326	175	34	3256	4521	528833	527563	0	1034	2	S
SMAC_Scaffolded_contig_107671	gi|358485511|ref|NC_006088.3|GGA1	90.23	174	17	0	4528	4701	534279	534452	2e-59	237	2	S
SMAC_Scaffolded_contig_37315	gi|358485511|ref|NC_006088.3|GGA1	78.81	335	50	3	176	490	537020	537353	6e-76	289	3	M
SMAC_Scaffolded_contig_13621	gi|358485511|ref|NC_006088.3|GGA1	81.03	58	8	1	364	421	541244	541190	0.0002	53	27	M
SMAC_Scaffolded_contig_34787	gi|358485511|ref|NC_006088.3|GGA1	78.71	512	54	8	3851	4358	542216	541756	2e-122	446	6	S
SMAC_Scaffolded_contig_80316	gi|358485511|ref|NC_006088.3|GGA1	78.28	847	113	16	585	1415	547444	548235	0	690	2	S
SMAC_Scaffolded_contig_78525	gi|358485511|ref|NC_006088.3|GGA1	82.29	638	79	10	472	1077	548474	549109	2e-177	627	2	S
SMAC_Scaffolded_contig_126420	gi|358485511|ref|NC_006088.3|GGA1	88.44	173	20	0	136	308	549899	550071	1e-55	223	3	S
SMAC_Scaffolded_contig_13933	gi|358485511|ref|NC_006088.3|GGA1	91.22	148	13	0	535	682	552817	552670	2e-51	208	2	S
SMAC_Scaffolded_contig_13934	gi|358485511|ref|NC_006088.3|GGA1	87.59	145	17	1	1073	1216	553416	553560	3e-42	178	22	M
SMAC_Scaffolded_contig_52424	gi|358485511|ref|NC_006088.3|GGA1	84.91	159	24	0	136	294	556639	556481	2e-42	179	3	S
SMAC_Scaffolded_contig_24363	gi|358485511|ref|NC_006088.3|GGA1	85.41	185	22	4	137	317	557061	557244	5e-49	199	1	S
SMAC_Scaffolded_contig_9027	gi|358485511|ref|NC_006088.3|GGA1	87.1	93	7	2	715	803	558659	558750	1e-21	109	1	S
SMAC_Scaffolded_contig_104824	gi|358485511|ref|NC_006088.3|GGA1	86.62	157	21	0	1234	1390	560366	560522	3e-45	188	1	S
SMAC_Scaffolded_contig_87209	gi|358485511|ref|NC_006088.3|GGA1	89.02	164	18	0	333	496	563396	563233	2e-53	215	2505	M
SMAC_Scaffolded_contig_10304	gi|358485511|ref|NC_006088.3|GGA1	89.38	113	10	1	659	771	568152	568262	1e-32	147	1	S
SMAC_Scaffolded_contig_10303	gi|358485511|ref|NC_006088.3|GGA1	87.61	113	12	1	396	508	568152	568262	3e-30	138	1	S
SMAC_Scaffolded_contig_39787	gi|358485511|ref|NC_006088.3|GGA1	79.63	54	11	0	193	246	577143	577090	0.017	48	19	M
SMAC_Scaffolded_contig_31255	gi|358485511|ref|NC_006088.3|GGA1	87.07	116	15	0	1500	1615	597001	596886	3e-31	141	1	S
SMAC_Scaffolded_contig_24985	gi|358485511|ref|NC_006088.3|GGA1	69.81	212	34	12	7	212	602385	602198	7e-09	68	42	M
SMAC_Scaffolded_contig_23209	gi|358485511|ref|NC_006088.3|GGA1	85.53	235	34	0	3813	4047	605648	605882	3e-69	271	11	M
SMAC_Scaffolded_contig_25564	gi|358485511|ref|NC_006088.3|GGA1	81.05	95	18	0	4650	4744	625223	625317	2e-15	91	29	M
SMAC_Scaffolded_contig_95070	gi|358485511|ref|NC_006088.3|GGA1	72.12	416	96	4	128	524	627521	627935	1e-57	228	1	S
SMAC_Scaffolded_contig_15862	gi|358485511|ref|NC_006088.3|GGA1	92.21	154	12	0	5726	5879	637671	637824	2e-55	224	765	M
SMAC_Scaffolded_contig_5008	gi|358485511|ref|NC_006088.3|GGA1	89.1	156	17	0	1463	1618	642574	642729	5e-50	205	4	S
SMAC_Scaffolded_contig_64994	gi|358485511|ref|NC_006088.3|GGA1	88.61	158	18	0	458	615	643400	643557	2e-50	205	1	S
SMAC_Scaffolded_contig_140086	gi|358485511|ref|NC_006088.3|GGA1	92.5	160	12	0	251	410	646110	645951	9e-60	235	1	S
SMAC_Scaffolded_contig_580	gi|358485511|ref|NC_006088.3|GGA1	90.32	186	16	2	5302	5486	646837	646653	1e-62	248	1	S
SMAC_Scaffolded_contig_23491	gi|358485511|ref|NC_006088.3|GGA1	86.12	209	29	0	1181	1389	647826	647618	1e-62	246	1	S
SMAC_Scaffolded_contig_4395	gi|358485511|ref|NC_006088.3|GGA1	77.59	58	12	1	388	444	654485	654428	0.082	42	18	M
SMAC_Scaffolded_contig_18909	gi|358485511|ref|NC_006088.3|GGA1	79.77	949	152	13	1097	2036	661136	660219	0	823	843	M
SMAC_Scaffolded_contig_117492	gi|358485511|ref|NC_006088.3|GGA1	73.75	240	51	3	59	286	663575	663814	1e-32	147	2	S
SMAC_Scaffolded_contig_121559	gi|358485511|ref|NC_006088.3|GGA1	73.54	189	31	6	252	434	671647	671472	1e-20	105	28404	M
SMAC_Scaffolded_contig_82055	gi|358485511|ref|NC_006088.3|GGA1	72.18	399	69	14	569	947	672236	671860	4e-47	194	1	S
SMAC_Scaffolded_contig_61741	gi|358485511|ref|NC_006088.3|GGA1	80.53	113	20	1	8490	8600	673139	673251	2e-18	102	33163	M
SMAC_Scaffolded_contig_8990	gi|358485511|ref|NC_006088.3|GGA1	70.37	270	70	4	210	477	680995	681256	1e-24	118	1	S
SMAC_Scaffolded_contig_4884	gi|358485511|ref|NC_006088.3|GGA1	82.93	82	13	1	1437	1518	688830	688910	3e-13	82	4905	M
SMAC_Scaffolded_contig_100815	gi|358485511|ref|NC_006088.3|GGA1	77.71	166	34	2	159	324	690527	690689	8e-27	127	1	S
SMAC_Scaffolded_contig_123228	gi|358485511|ref|NC_006088.3|GGA1	94.19	172	9	1	477	648	696427	696257	9e-68	262	3	M
SMAC_Scaffolded_contig_62027	gi|358485511|ref|NC_006088.3|GGA1	81.41	199	35	2	5446	5643	697830	698027	1e-43	185	9	M
SMAC_Scaffolded_contig_116554	gi|358485511|ref|NC_006088.3|GGA1	77.61	259	48	5	6896	7150	699694	699946	9e-46	192	4	M
SMAC_Scaffolded_contig_51615	gi|358485511|ref|NC_006088.3|GGA1	72.12	330	50	8	1193	1503	704723	704417	3e-43	183	6	M
SMAC_Scaffolded_contig_100416	gi|358485511|ref|NC_006088.3|GGA1	84.46	148	22	1	1175	1322	706500	706354	2e-36	159	34	M
SMAC_Scaffolded_contig_103835	gi|358485511|ref|NC_006088.3|GGA1	75.44	338	54	12	2475	2807	707895	707582	5e-51	208	2	S
SMAC_Scaffolded_contig_10804	gi|358485511|ref|NC_006088.3|GGA1	73.77	446	80	19	695	1129	712888	713307	2e-56	224	3	M
SMAC_Scaffolded_contig_3091	gi|358485511|ref|NC_006088.3|GGA1	74.28	661	133	13	1248	1890	715363	714722	3e-109	401	2	S
SMAC_Scaffolded_contig_3092	gi|358485511|ref|NC_006088.3|GGA1	83.23	155	26	0	2165	2319	716125	715971	1e-37	163	4	S
SMAC_Scaffolded_contig_107528	gi|358485511|ref|NC_006088.3|GGA1	75.66	304	52	5	2408	2710	719861	719579	4e-52	212	237	M
SMAC_Scaffolded_contig_97611	gi|358485511|ref|NC_006088.3|GGA1	88.89	45	5	0	535	579	720746	720702	1e-06	59	495	M
SMAC_Scaffolded_contig_51419	gi|358485511|ref|NC_006088.3|GGA1	95.12	123	5	1	283	404	722573	722451	2e-46	192	2	M
SMAC_Scaffolded_contig_51420	gi|358485511|ref|NC_006088.3|GGA1	86.38	301	41	0	2797	3097	724013	724313	6e-96	358	5	M
SMAC_Scaffolded_contig_75953	gi|358485511|ref|NC_006088.3|GGA1	71.32	401	92	12	131	512	727475	727871	3e-40	172	1	S
SMAC_Scaffolded_contig_82850	gi|358485511|ref|NC_006088.3|GGA1	70.37	162	25	11	73	217	731746	731901	0.002	48	36	M
SMAC_Scaffolded_contig_62036	gi|358485511|ref|NC_006088.3|GGA1	70.88	1322	247	31	2674	3912	733907	735173	1e-178	634	6	S
SMAC_Scaffolded_contig_77077	gi|358485511|ref|NC_006088.3|GGA1	67.74	465	80	11	188	641	740400	739995	7e-42	176	1	S
SMAC_Scaffolded_contig_39327	gi|358485511|ref|NC_006088.3|GGA1	67.72	728	150	18	13641	14345	742759	742094	9e-63	250	47	M
SMAC_Scaffolded_contig_186817	gi|358485511|ref|NC_006088.3|GGA1	83.33	48	6	2	441	486	744625	744672	0.021	44	34	M
SMAC_Scaffolded_contig_83294	gi|358485511|ref|NC_006088.3|GGA1	83.7	92	10	1	1427	1518	752645	752559	3e-18	98	522	M
SMAC_Scaffolded_contig_41932	gi|358485511|ref|NC_006088.3|GGA1	81.48	243	45	0	693	935	757499	757257	1e-59	235	4	S
SMAC_Scaffolded_contig_31046	gi|358485511|ref|NC_006088.3|GGA1	86.13	274	33	3	2637	2910	757504	757236	2e-82	315	43	M
SMAC_Scaffolded_contig_36320	gi|358485511|ref|NC_006088.3|GGA1	71.07	2420	459	70	1655	3966	762977	760691	0	1110	1	S
SMAC_Scaffolded_contig_46795	gi|358485511|ref|NC_006088.3|GGA1	69.67	511	82	18	84	587	765979	765535	6e-51	208	1	S
SMAC_Scaffolded_contig_34498	gi|358485511|ref|NC_006088.3|GGA1	79.78	371	42	8	501	869	766878	766539	1e-86	325	1	S
SMAC_Scaffolded_contig_4326	gi|358485511|ref|NC_006088.3|GGA1	91.55	213	18	0	1984	2196	767607	767395	6e-80	304	2615	M
SMAC_Scaffolded_contig_4327	gi|358485511|ref|NC_006088.3|GGA1	86.49	148	19	1	218	364	768598	768745	3e-41	174	1	S
SMAC_Scaffolded_contig_144284	gi|358485511|ref|NC_006088.3|GGA1	76.73	202	45	1	4894	5095	772115	772314	2e-33	150	1	S
SMAC_Scaffolded_contig_73193	gi|358485511|ref|NC_006088.3|GGA1	69.07	1332	278	41	3149	4464	775974	774761	9e-133	480	2	S
SMAC_Scaffolded_contig_57016	gi|358485511|ref|NC_006088.3|GGA1	72.86	818	152	24	331	1129	778310	779076	3e-117	430	5	S
SMAC_Scaffolded_contig_57017	gi|358485511|ref|NC_006088.3|GGA1	73.3	693	130	10	1404	2094	783513	782874	5e-115	421	3	S
SMAC_Scaffolded_contig_6665	gi|358485511|ref|NC_006088.3|GGA1	90.68	354	27	1	71	418	788894	788541	2e-136	491	1	S
SMAC_Scaffolded_contig_100107	gi|358485511|ref|NC_006088.3|GGA1	73.15	216	56	2	12	227	789310	789523	9e-26	122	1	S
SMAC_Scaffolded_contig_97002	gi|358485511|ref|NC_006088.3|GGA1	87.62	202	22	2	74	273	790975	790775	1e-62	246	1	S
SMAC_Scaffolded_contig_128798	gi|358485511|ref|NC_006088.3|GGA1	81.01	79	8	3	285	363	791360	791431	2e-09	68	38	M
SMAC_Scaffolded_contig_120055	gi|358485511|ref|NC_006088.3|GGA1	84.21	76	10	1	430	503	793209	793134	8e-13	80	520	M
SMAC_Scaffolded_contig_56882	gi|358485511|ref|NC_006088.3|GGA1	89.73	263	14	5	4001	4258	796340	796086	9e-91	342	8	M
SMAC_Scaffolded_contig_128555	gi|358485511|ref|NC_006088.3|GGA1	74.67	75	11	2	898	964	797557	797631	0.003	48	27	M
SMAC_Scaffolded_contig_32061	gi|358485511|ref|NC_006088.3|GGA1	76.16	172	24	4	751	907	804014	804183	8e-26	123	1	S
SMAC_Scaffolded_contig_37404	gi|358485511|ref|NC_006088.3|GGA1	91.84	49	4	0	1637	1685	805453	805405	2e-09	71	196	M
SMAC_Scaffolded_contig_37403	gi|358485511|ref|NC_006088.3|GGA1	85.77	527	53	10	19	529	807091	807611	8e-166	587	1	S
SMAC_Scaffolded_contig_30036	gi|358485511|ref|NC_006088.3|GGA1	83.06	1216	109	29	6240	7440	809466	808333	0	1222	2880	M
SMAC_Scaffolded_contig_113094	gi|358485511|ref|NC_006088.3|GGA1	75.19	387	44	7	877	1236	813922	814283	4e-73	280	1	S
SMAC_Scaffolded_contig_24552	gi|358485511|ref|NC_006088.3|GGA1	68.46	1040	205	20	5093	6057	815031	816022	1e-113	417	21	M
SMAC_Scaffolded_contig_45659	gi|358485511|ref|NC_006088.3|GGA1	70	470	112	8	190	636	819520	819057	6e-50	203	1	S
SMAC_Scaffolded_contig_88033	gi|358485511|ref|NC_006088.3|GGA1	69.08	1785	355	54	290	2008	820116	821769	0	664	2	S
SMAC_Scaffolded_contig_29676	gi|358485511|ref|NC_006088.3|GGA1	69.56	1199	234	35	11014	12154	823563	824688	4e-131	477	7	M
SMAC_Scaffolded_contig_52647	gi|358485511|ref|NC_006088.3|GGA1	67.93	736	134	24	124	808	835280	834596	1e-62	248	4	S
SMAC_Scaffolded_contig_55835	gi|358485511|ref|NC_006088.3|GGA1	70.84	1101	237	29	233	1287	836508	835446	2e-134	484	1	S
SMAC_Scaffolded_contig_36465	gi|358485511|ref|NC_006088.3|GGA1	68.95	1240	270	30	9564	10757	842537	841367	5e-129	470	6	S
SMAC_Scaffolded_contig_32577	gi|358485511|ref|NC_006088.3|GGA1	65.6	532	112	18	4617	5115	851004	850511	1e-23	118	18522	M
SMAC_Scaffolded_contig_96245	gi|358485511|ref|NC_006088.3|GGA1	71.58	651	106	17	1162	1805	851945	851367	3e-89	334	1823	M
SMAC_Scaffolded_contig_23417	gi|358485511|ref|NC_006088.3|GGA1	69.48	924	144	27	1582	2392	855512	856410	2e-107	398	5687	M
SMAC_Scaffolded_contig_98639	gi|358485511|ref|NC_006088.3|GGA1	86.63	187	25	0	224	410	857081	857267	2e-56	224	2	S
SMAC_Scaffolded_contig_62632	gi|358485511|ref|NC_006088.3|GGA1	68.23	447	115	12	75	512	866517	866089	1e-29	136	1	S
SMAC_Scaffolded_contig_20653	gi|358485511|ref|NC_006088.3|GGA1	79.13	877	134	11	2105	2947	868200	867339	0	751	25	M
SMAC_Scaffolded_contig_19865	gi|358485511|ref|NC_006088.3|GGA1	68.5	708	150	21	572	1244	869730	870399	1e-61	242	2	S
SMAC_Scaffolded_contig_18285	gi|358485511|ref|NC_006088.3|GGA1	72.89	1656	275	37	412	2006	879324	877782	0	953	1127	M
SMAC_Scaffolded_contig_13946	gi|358485511|ref|NC_006088.3|GGA1	72.65	618	106	18	74	678	880499	881066	4e-87	329	3	S
SMAC_Scaffolded_contig_166437	gi|358485511|ref|NC_006088.3|GGA1	88.1	84	10	0	112	195	887106	887023	3e-21	107	1	S
SMAC_Scaffolded_contig_53994	gi|358485511|ref|NC_006088.3|GGA1	70.26	427	80	10	236	654	888533	888146	1e-47	196	1	S
SMAC_Scaffolded_contig_15564	gi|358485511|ref|NC_006088.3|GGA1	72.83	703	100	25	2752	3372	892396	891703	2e-101	376	1672	M
SMAC_Scaffolded_contig_131237	gi|358485511|ref|NC_006088.3|GGA1	76.51	149	30	3	216	359	898051	897903	1e-19	102	44572	M
SMAC_Scaffolded_contig_126829	gi|358485511|ref|NC_006088.3|GGA1	74.68	316	61	7	828	1127	899321	899633	2e-47	196	28	M
SMAC_Scaffolded_contig_26251	gi|358485511|ref|NC_006088.3|GGA1	71.95	1262	284	32	2676	3911	902779	903996	3e-168	600	8	S
SMAC_Scaffolded_contig_129042	gi|358485511|ref|NC_006088.3|GGA1	82.03	306	46	4	2588	2884	907403	907708	4e-77	295	3	S
SMAC_Scaffolded_contig_47649	gi|358485511|ref|NC_006088.3|GGA1	81.82	363	62	4	78	437	909348	908987	2e-92	343	1	S
SMAC_Scaffolded_contig_85218	gi|358485511|ref|NC_006088.3|GGA1	81.13	159	29	1	562	720	912514	912671	2e-33	149	1	S
SMAC_Scaffolded_contig_44586	gi|358485511|ref|NC_006088.3|GGA1	80.2	202	33	1	101	295	912985	913186	4e-45	187	3	S
SMAC_Scaffolded_contig_68692	gi|358485511|ref|NC_006088.3|GGA1	74.64	489	97	6	135	623	914193	914654	8e-85	320	3	S
SMAC_Scaffolded_contig_70820	gi|358485511|ref|NC_006088.3|GGA1	71.27	912	184	22	979	1837	919157	920043	4e-119	435	17	M
SMAC_Scaffolded_contig_119731	gi|358485511|ref|NC_006088.3|GGA1	70.07	1263	263	29	3382	4577	924534	923320	8e-153	547	12	M
SMAC_Scaffolded_contig_74976	gi|358485511|ref|NC_006088.3|GGA1	93.55	31	1	1	4724	4754	927677	927706	0.21	44	11	M
SMAC_Scaffolded_contig_102783	gi|358485511|ref|NC_006088.3|GGA1	69.7	759	174	19	2283	3023	927912	927192	2e-77	297	2	S
SMAC_Scaffolded_contig_104760	gi|358485511|ref|NC_006088.3|GGA1	82.73	110	18	1	344	452	931219	931328	9e-22	109	1	S
SMAC_Scaffolded_contig_52272	gi|358485511|ref|NC_006088.3|GGA1	80.62	650	89	13	455	1088	935546	934918	1e-162	580	4	S
SMAC_Scaffolded_contig_25211	gi|358485511|ref|NC_006088.3|GGA1	73.04	549	86	20	333	843	937288	937812	5e-76	289	1	S
SMAC_Scaffolded_contig_104974	gi|358485511|ref|NC_006088.3|GGA1	87.88	231	28	0	470	700	938178	938408	2e-76	291	2	M
SMAC_Scaffolded_contig_144395	gi|358485511|ref|NC_006088.3|GGA1	80.68	440	65	5	121	557	938986	938564	2e-111	407	2	S
SMAC_Scaffolded_contig_29952	gi|358485511|ref|NC_006088.3|GGA1	78.63	117	24	1	2812	2927	949886	949770	7e-17	95	13928	M
SMAC_Scaffolded_contig_91144	gi|358485511|ref|NC_006088.3|GGA1	69.18	662	140	24	1811	2429	950437	951077	7e-56	224	51	M
SMAC_Scaffolded_contig_96000	gi|358485511|ref|NC_006088.3|GGA1	74.69	399	80	9	149	543	967222	966841	4e-62	242	1	S
SMAC_Scaffolded_contig_17404	gi|358485511|ref|NC_006088.3|GGA1	80.1	196	36	2	1998	2190	974820	975015	6e-40	172	30	M
SMAC_Scaffolded_contig_181410	gi|358485511|ref|NC_006088.3|GGA1	79.72	212	35	2	251	462	979514	979311	3e-45	187	1	S
SMAC_Scaffolded_contig_9801	gi|358485511|ref|NC_006088.3|GGA1	72.17	230	50	7	381	607	981421	981639	2e-21	107	1	S
SMAC_Scaffolded_contig_44122	gi|358485511|ref|NC_006088.3|GGA1	83	200	31	3	2025	2222	982216	982414	2e-47	197	3	S
SMAC_Scaffolded_contig_87786	gi|358485511|ref|NC_006088.3|GGA1	68.05	507	111	13	719	1212	987816	988284	3e-40	172	2	S
SMAC_Scaffolded_contig_71233	gi|358485511|ref|NC_006088.3|GGA1	69.85	481	104	11	852	1310	990394	989933	4e-49	201	2	S
SMAC_Scaffolded_contig_90605	gi|358485511|ref|NC_006088.3|GGA1	74.11	564	122	11	1433	1988	990945	990398	4e-88	331	1	S
SMAC_Scaffolded_contig_64418	gi|358485511|ref|NC_006088.3|GGA1	70.88	783	171	15	1659	2395	992168	991397	2e-99	369	1	S
SMAC_Scaffolded_contig_93033	gi|358485511|ref|NC_006088.3|GGA1	68.33	2719	536	86	6411	8925	1003230	1005827	0	928	2	S
SMAC_Scaffolded_contig_24180	gi|358485511|ref|NC_006088.3|GGA1	69.6	1260	262	34	144	1317	1003233	1002009	4e-139	502	2	S
SMAC_Scaffolded_contig_99068	gi|358485511|ref|NC_006088.3|GGA1	70.57	333	77	8	5719	6042	1007842	1007522	1e-30	141	1	S
SMAC_Scaffolded_contig_42723	gi|358485511|ref|NC_006088.3|GGA1	69.06	879	178	22	5440	6285	1009102	1008285	6e-92	345	18	M
SMAC_Scaffolded_contig_158502	gi|358485511|ref|NC_006088.3|GGA1	78.45	181	38	1	25	204	1010154	1010334	2e-33	147	2	S
SMAC_Scaffolded_contig_74623	gi|358485511|ref|NC_006088.3|GGA1	82.11	503	80	5	10807	11301	1020233	1020733	2e-134	488	6	S
SMAC_Scaffolded_contig_36816	gi|358485511|ref|NC_006088.3|GGA1	72.97	1010	202	25	3878	4838	1023505	1024492	3e-151	542	148	M
SMAC_Scaffolded_contig_1850	gi|358485511|ref|NC_006088.3|GGA1	89.1	1101	75	19	2304	3396	1027749	1026686	0	1400	3	S
SMAC_Scaffolded_contig_28421	gi|358485511|ref|NC_006088.3|GGA1	70.37	540	106	17	1431	1963	1030321	1029829	7e-56	224	3	S
SMAC_Scaffolded_contig_28420	gi|358485511|ref|NC_006088.3|GGA1	67.63	794	172	19	166	904	1031791	1032554	9e-68	264	181	M
SMAC_Scaffolded_contig_67791	gi|358485511|ref|NC_006088.3|GGA1	70.85	957	197	21	74	980	1036905	1037829	2e-123	448	1	S
SMAC_Scaffolded_contig_128310	gi|358485511|ref|NC_006088.3|GGA1	74.01	377	90	2	626	994	1038894	1039270	4e-60	237	2	S
SMAC_Scaffolded_contig_50018	gi|358485511|ref|NC_006088.3|GGA1	69.55	1248	291	30	106	1322	1039322	1040511	1e-133	482	1	S
SMAC_Scaffolded_contig_173094	gi|358485511|ref|NC_006088.3|GGA1	70.88	807	170	19	22	805	1044428	1045192	6e-100	369	1	S
SMAC_Scaffolded_contig_82991	gi|358485511|ref|NC_006088.3|GGA1	73.2	403	86	7	602	986	1045655	1045257	2e-57	228	1	S
SMAC_Scaffolded_contig_55338	gi|358485511|ref|NC_006088.3|GGA1	66.91	819	177	21	901	1642	1047996	1047195	2e-62	246	2	S
SMAC_Scaffolded_contig_55339	gi|358485511|ref|NC_006088.3|GGA1	71.58	1559	276	46	1364	2833	1049098	1050578	0	758	6181	M
SMAC_Scaffolded_contig_98292	gi|358485511|ref|NC_006088.3|GGA1	69.27	576	99	20	134	688	1053829	1054347	4e-55	221	1	S
SMAC_Scaffolded_contig_98777	gi|358485511|ref|NC_006088.3|GGA1	65.69	510	113	21	1847	2325	1056522	1057000	2e-16	93	24922	M
SMAC_Scaffolded_contig_71710	gi|358485511|ref|NC_006088.3|GGA1	70.53	319	69	8	3189	3490	1058181	1058491	1e-29	138	2	S
SMAC_Scaffolded_contig_54356	gi|358485511|ref|NC_006088.3|GGA1	67.16	609	139	18	102	671	1063526	1064112	5e-39	170	1686	M
SMAC_Scaffolded_contig_119806	gi|358485511|ref|NC_006088.3|GGA1	73.33	225	52	3	1	224	1065061	1065278	3e-27	129	1	S
SMAC_Scaffolded_contig_145288	gi|358485511|ref|NC_006088.3|GGA1	86.36	132	17	1	4825	4956	1070325	1070455	2e-34	154	1	S
SMAC_Scaffolded_contig_150267	gi|358485511|ref|NC_006088.3|GGA1	69.27	218	39	7	277	487	1075571	1075767	7e-15	86	887	M
SMAC_Scaffolded_contig_27519	gi|358485511|ref|NC_006088.3|GGA1	75.12	840	148	15	1372	2153	1077341	1076505	2e-156	560	5	S
SMAC_Scaffolded_contig_6226	gi|358485511|ref|NC_006088.3|GGA1	79.4	840	123	13	751	1574	1085181	1084376	0	722	1	S
SMAC_Scaffolded_contig_17705	gi|358485511|ref|NC_006088.3|GGA1	69.98	473	101	13	482	925	1086285	1085825	1e-46	192	1	S
SMAC_Scaffolded_contig_127750	gi|358485511|ref|NC_006088.3|GGA1	68.36	177	43	5	281	449	1086592	1086421	3e-06	57	41	M
SMAC_Scaffolded_contig_67848	gi|358485511|ref|NC_006088.3|GGA1	78.09	867	129	15	186	1005	1090104	1089252	0	695	1	S
SMAC_Scaffolded_contig_103637	gi|358485511|ref|NC_006088.3|GGA1	79.56	455	88	3	88	540	1090185	1090636	4e-107	392	1	S
SMAC_Scaffolded_contig_100519	gi|358485511|ref|NC_006088.3|GGA1	78.22	946	129	17	99	1026	1090921	1091807	0	771	1	S
SMAC_Scaffolded_contig_25090	gi|358485511|ref|NC_006088.3|GGA1	76.74	3233	539	55	25	3142	1091852	1094986	0	2385	2	M
SMAC_Scaffolded_contig_100199	gi|358485511|ref|NC_006088.3|GGA1	74.39	1187	227	24	2762	3922	1096245	1095110	0	731	3	S
SMAC_Scaffolded_contig_90676	gi|358485511|ref|NC_006088.3|GGA1	81.56	282	42	3	1606	1886	1100517	1100245	2e-69	269	3	S
SMAC_Scaffolded_contig_146928	gi|358485511|ref|NC_006088.3|GGA1	90	30	3	0	315	344	1110364	1110335	0.25	41	39	M
SMAC_Scaffolded_contig_152063	gi|358485511|ref|NC_006088.3|GGA1	78.3	576	109	12	45	611	1114509	1113941	4e-120	435	1	S
SMAC_Scaffolded_contig_119008	gi|358485511|ref|NC_006088.3|GGA1	74.43	1013	173	21	882	1838	1118844	1117862	0	643	2	S
SMAC_Scaffolded_contig_28330	gi|358485511|ref|NC_006088.3|GGA1	74.76	2203	385	59	18805	20899	1119172	1121311	0	1355	13	S
SMAC_Scaffolded_contig_167714	gi|358485511|ref|NC_006088.3|GGA1	93.33	30	1	1	62	90	1122152	1122181	0.068	42	19	M
SMAC_Scaffolded_contig_72658	gi|358485511|ref|NC_006088.3|GGA1	71.4	2360	435	64	216	2394	1126682	1124382	0	1141	1	S
SMAC_Scaffolded_contig_40991	gi|358485511|ref|NC_006088.3|GGA1	67.43	826	159	18	182	948	1133029	1133803	1e-77	295	1	S
SMAC_Scaffolded_contig_68664	gi|358485511|ref|NC_006088.3|GGA1	88.06	335	34	4	3039	3370	1134501	1134170	5e-112	412	4	S
SMAC_Scaffolded_contig_118941	gi|358485511|ref|NC_006088.3|GGA1	88.89	36	4	0	2	37	1137763	1137798	0.002	48	30	M
SMAC_Scaffolded_contig_8331	gi|358485511|ref|NC_006088.3|GGA1	70.59	374	72	9	932	1277	1137982	1138345	3e-40	172	1	S
SMAC_Scaffolded_contig_95697	gi|358485511|ref|NC_006088.3|GGA1	71.54	773	159	23	289	1041	1141699	1140968	3e-95	354	285	M
SMAC_Scaffolded_contig_1736	gi|358485511|ref|NC_006088.3|GGA1	69.75	1299	276	26	2730	3977	1143954	1142722	2e-156	560	4	S
SMAC_Scaffolded_contig_1735	gi|358485511|ref|NC_006088.3|GGA1	74.43	348	76	3	285	619	1146333	1146680	2e-56	224	222	M
SMAC_Scaffolded_contig_108554	gi|358485511|ref|NC_006088.3|GGA1	70.91	526	96	14	173	671	1146880	1147375	3e-63	248	54	M
SMAC_Scaffolded_contig_30544	gi|358485511|ref|NC_006088.3|GGA1	81.63	2090	280	41	6575	8618	1154261	1156292	0	1947	27553	M
SMAC_Scaffolded_contig_58101	gi|358485511|ref|NC_006088.3|GGA1	81.27	630	102	6	1904	2525	1165257	1164636	3e-166	592	24	M
SMAC_Scaffolded_contig_177204	gi|358485511|ref|NC_006088.3|GGA1	72.76	257	52	7	258	506	1167529	1167775	5e-29	132	1	S
SMAC_Scaffolded_contig_66806	gi|358485511|ref|NC_006088.3|GGA1	76.46	531	92	11	2255	2784	1168165	1168663	1e-100	374	3	S
SMAC_Scaffolded_contig_85617	gi|358485511|ref|NC_006088.3|GGA1	64.99	714	170	17	415	1092	1171321	1170652	1e-35	156	1974	M
SMAC_Scaffolded_contig_25022	gi|358485511|ref|NC_006088.3|GGA1	81.06	132	24	1	1964	2095	1172416	1172286	5e-25	122	1	S
SMAC_Scaffolded_contig_95723	gi|358485511|ref|NC_006088.3|GGA1	70	310	55	7	205	477	1174046	1174354	4e-32	143	1	S
SMAC_Scaffolded_contig_82168	gi|358485511|ref|NC_006088.3|GGA1	71.26	769	132	16	333	1038	1174530	1175272	8e-109	399	2	S
SMAC_Scaffolded_contig_42353	gi|358485511|ref|NC_006088.3|GGA1	76.61	945	169	12	4281	5179	1180045	1180983	0	700	2	S
SMAC_Scaffolded_contig_135817	gi|358485511|ref|NC_006088.3|GGA1	72.17	794	184	14	433	1211	1182108	1182879	4e-111	407	1	S
SMAC_Scaffolded_contig_97302	gi|358485511|ref|NC_006088.3|GGA1	73.05	512	98	11	1078	1576	1185547	1186031	3e-75	288	3	S
SMAC_Scaffolded_contig_82558	gi|358485511|ref|NC_006088.3|GGA1	88.89	36	4	0	1157	1192	1186038	1186073	0.004	48	85	M
SMAC_Scaffolded_contig_29527	gi|358485511|ref|NC_006088.3|GGA1	71.29	1421	264	25	13950	15315	1191403	1192734	0	740	15	S
SMAC_Scaffolded_contig_29528	gi|358485511|ref|NC_006088.3|GGA1	68.17	1310	267	31	8145	9333	1199896	1198616	7e-132	479	7	S
SMAC_Scaffolded_contig_158922	gi|358485511|ref|NC_006088.3|GGA1	90.32	31	2	1	82	111	1200327	1200297	3.3	39	1	S
SMAC_Scaffolded_contig_110062	gi|358485511|ref|NC_006088.3|GGA1	76.5	183	38	2	335	512	1206436	1206254	8e-29	132	1	S
SMAC_Scaffolded_contig_37428	gi|358485511|ref|NC_006088.3|GGA1	70.05	2077	427	41	840	2856	1208836	1206895	0	933	3	M
SMAC_Scaffolded_contig_44441	gi|358485511|ref|NC_006088.3|GGA1	79.42	311	58	2	344	654	1209731	1210035	9e-70	269	2	S
SMAC_Scaffolded_contig_5406	gi|358485511|ref|NC_006088.3|GGA1	74.18	213	38	4	828	1040	1211672	1211867	4e-29	134	1	S
SMAC_Scaffolded_contig_75620	gi|358485511|ref|NC_006088.3|GGA1	70.78	510	120	12	170	662	1213849	1213352	3e-55	221	1	S
SMAC_Scaffolded_contig_52674	gi|358485511|ref|NC_006088.3|GGA1	73.12	573	112	16	1152	1710	1215566	1216110	2e-80	306	2	S
SMAC_Scaffolded_contig_56977	gi|358485511|ref|NC_006088.3|GGA1	73.9	820	173	14	2863	3670	1218544	1219334	2e-134	488	9	S
SMAC_Scaffolded_contig_162100	gi|358485511|ref|NC_006088.3|GGA1	78.33	120	17	1	71	190	1221538	1221428	2e-20	104	12899	M
SMAC_Scaffolded_contig_106020	gi|358485511|ref|NC_006088.3|GGA1	77.33	322	62	5	202	512	1224153	1223832	2e-60	239	3	S
SMAC_Scaffolded_contig_47126	gi|358485511|ref|NC_006088.3|GGA1	81.89	127	22	1	201	326	1228954	1228828	2e-25	122	2	M
SMAC_Scaffolded_contig_47099	gi|358485511|ref|NC_006088.3|GGA1	74.97	763	141	16	1749	2473	1230508	1231258	6e-135	488	4	S
SMAC_Scaffolded_contig_22089	gi|358485511|ref|NC_006088.3|GGA1	75.62	804	141	12	2787	3572	1237590	1238356	2e-157	562	5	S
SMAC_Scaffolded_contig_102905	gi|358485511|ref|NC_006088.3|GGA1	72.46	207	42	7	4650	4850	1246110	1245913	1e-17	98	1021	M
SMAC_Scaffolded_contig_142248	gi|358485511|ref|NC_006088.3|GGA1	84.54	97	14	1	1107	1202	1246110	1246014	6e-20	104	1309	M
SMAC_Scaffolded_contig_84636	gi|358485511|ref|NC_006088.3|GGA1	75.98	433	81	7	937	1359	1250572	1250991	2e-79	302	2	S
SMAC_Scaffolded_contig_51237	gi|358485511|ref|NC_006088.3|GGA1	96.15	26	1	0	239	264	1253780	1253755	0.073	42	9	M
SMAC_Scaffolded_contig_19447	gi|358485511|ref|NC_006088.3|GGA1	72.79	3385	635	80	1519	4805	1254901	1251705	0	1849	24	S
SMAC_Scaffolded_contig_154274	gi|358485511|ref|NC_006088.3|GGA1	79.89	522	84	4	1	520	1261041	1260539	2e-130	470	1	S
SMAC_Scaffolded_contig_106330	gi|358485511|ref|NC_006088.3|GGA1	67.71	1409	311	28	53	1399	1261513	1262839	7e-137	493	1	S
SMAC_Scaffolded_contig_121126	gi|358485511|ref|NC_006088.3|GGA1	67.61	886	191	21	1005	1858	1265101	1264280	1e-77	297	5949	M
SMAC_Scaffolded_contig_71583	gi|358485511|ref|NC_006088.3|GGA1	68.58	1477	344	34	375	1775	1266944	1268376	5e-147	527	3	S
SMAC_Scaffolded_contig_76419	gi|358485511|ref|NC_006088.3|GGA1	70.26	686	117	19	2909	3525	1271615	1270948	7e-82	311	3	S
SMAC_Scaffolded_contig_17017	gi|358485511|ref|NC_006088.3|GGA1	75.61	1033	184	21	7649	8619	1278325	1277299	0	693	5	S
SMAC_Scaffolded_contig_58009	gi|358485511|ref|NC_006088.3|GGA1	68.26	1273	284	29	69	1304	1281836	1283025	1e-124	452	1	S
SMAC_Scaffolded_contig_67199	gi|358485511|ref|NC_006088.3|GGA1	73.88	601	122	15	1705	2299	1285146	1284575	1e-90	340	805	M
SMAC_Scaffolded_contig_55806	gi|358485511|ref|NC_006088.3|GGA1	78.78	886	140	15	6221	7094	1290146	1289297	0	726	870	M
SMAC_Scaffolded_contig_120699	gi|358485511|ref|NC_006088.3|GGA1	71.73	2441	519	53	241	2565	1298063	1295678	0	1207	61	M
SMAC_Scaffolded_contig_28853	gi|358485511|ref|NC_006088.3|GGA1	70.03	2129	436	54	1252	3276	1298747	1300777	0	902	37	M
SMAC_Scaffolded_contig_92214	gi|358485511|ref|NC_006088.3|GGA1	85.29	272	37	1	133	401	1301082	1301353	2e-81	309	3	S
SMAC_Scaffolded_contig_62645	gi|358485511|ref|NC_006088.3|GGA1	91.89	37	3	0	476	512	1312533	1312569	0.0001	53	59	M
SMAC_Scaffolded_contig_49946	gi|358485511|ref|NC_006088.3|GGA1	70.47	1219	253	23	60	1249	1313561	1312421	7e-160	569	1	S
SMAC_Scaffolded_contig_115996	gi|358485511|ref|NC_006088.3|GGA1	72.88	992	197	19	950	1898	1315381	1316343	7e-156	556	4	M
SMAC_Scaffolded_contig_86408	gi|358485511|ref|NC_006088.3|GGA1	82.81	733	112	6	1593	2313	1318364	1319094	0	740	2202	M
SMAC_Scaffolded_contig_116959	gi|358485511|ref|NC_006088.3|GGA1	71.66	367	52	9	2	346	1324352	1324688	4e-48	199	2	S
SMAC_Scaffolded_contig_47232	gi|358485511|ref|NC_006088.3|GGA1	76.61	1967	314	34	607	2534	1339215	1337356	0	1452	9352	M
SMAC_Scaffolded_contig_63977	gi|358485511|ref|NC_006088.3|GGA1	72.28	2377	475	47	1533	3786	1340867	1343182	0	1270	7	M
SMAC_Scaffolded_contig_39675	gi|358485511|ref|NC_006088.3|GGA1	73.54	514	95	12	79	570	1343831	1343337	4e-78	297	1	S
SMAC_Scaffolded_contig_39676	gi|358485511|ref|NC_006088.3|GGA1	80.96	788	129	5	2443	3210	1345411	1346197	0	742	122	M
SMAC_Scaffolded_contig_149549	gi|358485511|ref|NC_006088.3|GGA1	69.55	381	66	5	301	654	1347472	1347115	4e-45	187	1	S
SMAC_Scaffolded_contig_126006	gi|358485511|ref|NC_006088.3|GGA1	79.82	114	14	4	603	715	1347885	1347990	6e-17	93	540	M
SMAC_Scaffolded_contig_150497	gi|358485511|ref|NC_006088.3|GGA1	73.66	186	34	7	46	227	1347914	1348088	4e-18	96	441	M
SMAC_Scaffolded_contig_72285	gi|358485511|ref|NC_006088.3|GGA1	94.29	35	2	0	1464	1498	1351254	1351220	4e-05	55	122	M
SMAC_Scaffolded_contig_58889	gi|358485511|ref|NC_006088.3|GGA1	75.99	2241	378	48	6240	8437	1352664	1354787	0	1544	4876	M
SMAC_Scaffolded_contig_132674	gi|358485511|ref|NC_006088.3|GGA1	73.3	1086	218	22	733	1763	1361133	1360065	2e-174	618	2	S
SMAC_Scaffolded_contig_22348	gi|358485511|ref|NC_006088.3|GGA1	76.35	1336	240	21	3984	5271	1366988	1368295	0	958	5	S
SMAC_Scaffolded_contig_115466	gi|358485511|ref|NC_006088.3|GGA1	75.28	1954	327	40	132	1996	1370671	1372557	0	1306	1	S
SMAC_Scaffolded_contig_115470	gi|358485511|ref|NC_006088.3|GGA1	78.23	248	35	4	251	494	1372153	1371921	3e-50	203	1	S
SMAC_Scaffolded_contig_2832	gi|358485511|ref|NC_006088.3|GGA1	84.84	752	88	7	11856	12586	1375992	1375246	0	834	3594	M
SMAC_Scaffolded_contig_192690	gi|358485511|ref|NC_006088.3|GGA1	78.28	198	37	4	273	465	1387044	1387240	2e-34	150	1	S
SMAC_Scaffolded_contig_93300	gi|358485511|ref|NC_006088.3|GGA1	71.6	250	60	6	191	434	1389046	1388802	3e-23	114	1	S
SMAC_Scaffolded_contig_39691	gi|358485511|ref|NC_006088.3|GGA1	78.29	1004	167	13	380	1360	1390786	1389811	0	816	8863	M
SMAC_Scaffolded_contig_80808	gi|358485511|ref|NC_006088.3|GGA1	77.27	805	144	15	2001	2786	1391790	1391006	3e-167	594	2881	M
SMAC_Scaffolded_contig_80809	gi|358485511|ref|NC_006088.3|GGA1	64.84	620	140	11	581	1199	1394185	1394727	2e-35	156	9	M
SMAC_Scaffolded_contig_90518	gi|358485511|ref|NC_006088.3|GGA1	70.38	1472	300	34	3753	5134	1396488	1395063	0	659	97	M
SMAC_Scaffolded_contig_157983	gi|358485511|ref|NC_006088.3|GGA1	90.48	42	4	0	531	572	1398446	1398405	1e-06	59	1243	M
SMAC_Scaffolded_contig_103482	gi|358485511|ref|NC_006088.3|GGA1	72.28	534	91	16	156	681	1399367	1399851	1e-71	275	1	S
SMAC_Scaffolded_contig_60017	gi|358485511|ref|NC_006088.3|GGA1	81.05	665	102	6	2238	2881	1404536	1403875	7e-177	627	44	M
SMAC_Scaffolded_contig_22019	gi|358485511|ref|NC_006088.3|GGA1	71.98	1285	264	31	2802	4016	1408284	1407026	0	641	11412	M
SMAC_Scaffolded_contig_31696	gi|358485511|ref|NC_006088.3|GGA1	78.34	1316	222	25	4185	5455	1413757	1412460	0	1032	16	M
SMAC_Scaffolded_contig_727	gi|358485511|ref|NC_006088.3|GGA1	73.32	1597	325	25	490	2041	1419872	1418332	0	939	1	S
SMAC_Scaffolded_contig_728	gi|358485511|ref|NC_006088.3|GGA1	71.81	1600	303	40	1122	2623	1422693	1424242	0	805	2	S
SMAC_Scaffolded_contig_90485	gi|358485511|ref|NC_006088.3|GGA1	68.92	1596	366	42	352	1886	1426965	1425439	3e-160	571	1	S
SMAC_Scaffolded_contig_65760	gi|358485511|ref|NC_006088.3|GGA1	70.08	1661	335	29	1325	2849	1429426	1427792	0	771	24	M
SMAC_Scaffolded_contig_62558	gi|358485511|ref|NC_006088.3|GGA1	75.73	1310	214	25	305	1555	1439423	1438159	0	910	5333	M
SMAC_Scaffolded_contig_79191	gi|358485511|ref|NC_006088.3|GGA1	79.7	463	82	6	1733	2193	1440778	1440326	2e-107	396	2	S
SMAC_Scaffolded_contig_122714	gi|358485511|ref|NC_006088.3|GGA1	79.8	896	137	7	468	1324	1442312	1443202	0	809	1	S
SMAC_Scaffolded_contig_64862	gi|358485511|ref|NC_006088.3|GGA1	75.43	1986	344	42	2046	3985	1450700	1448813	0	1323	17403	M
SMAC_Scaffolded_contig_86862	gi|358485511|ref|NC_006088.3|GGA1	81.4	984	153	15	3779	4742	1454532	1453559	0	910	18741	M
SMAC_Scaffolded_contig_108895	gi|358485511|ref|NC_006088.3|GGA1	69.54	1031	186	38	92	1064	1461320	1460360	2e-105	389	1795	M
SMAC_Scaffolded_contig_60870	gi|358485511|ref|NC_006088.3|GGA1	78.7	338	60	4	448	776	1462537	1462203	8e-73	279	2	S
SMAC_Scaffolded_contig_108896	gi|358485511|ref|NC_006088.3|GGA1	76.84	665	121	9	108	742	1463530	1464191	6e-138	495	1	S
SMAC_Scaffolded_contig_147976	gi|358485511|ref|NC_006088.3|GGA1	77.89	864	138	17	103	935	1465272	1464431	0	668	1	S
SMAC_Scaffolded_contig_61669	gi|358485511|ref|NC_006088.3|GGA1	72.93	1138	214	18	2572	3633	1467079	1468198	0	668	4	S
SMAC_Scaffolded_contig_89799	gi|358485511|ref|NC_006088.3|GGA1	75.24	1062	216	19	84	1128	1474419	1475450	0	686	1	S
SMAC_Scaffolded_contig_114610	gi|358485511|ref|NC_006088.3|GGA1	73.48	1154	227	18	153	1272	1477953	1476845	0	691	5	S
SMAC_Scaffolded_contig_130192	gi|358485511|ref|NC_006088.3|GGA1	70.88	625	137	14	144	755	1478928	1479520	2e-74	284	1	S
SMAC_Scaffolded_contig_115729	gi|358485511|ref|NC_006088.3|GGA1	77.44	860	170	12	169	1017	1479696	1480542	0	645	3	M
SMAC_Scaffolded_contig_177514	gi|358485511|ref|NC_006088.3|GGA1	74.29	70	14	1	27	92	1480227	1480296	0.036	44	56	M
SMAC_Scaffolded_contig_133554	gi|358485511|ref|NC_006088.3|GGA1	72.33	701	141	15	449	1112	1483052	1482368	6e-100	370	2	S
SMAC_Scaffolded_contig_14172	gi|358485511|ref|NC_006088.3|GGA1	75	1632	308	26	180	1751	1484701	1486292	0	1077	9	M
SMAC_Scaffolded_contig_106963	gi|358485511|ref|NC_006088.3|GGA1	80.24	167	28	3	497	663	1489228	1489389	6e-32	143	2	S
SMAC_Scaffolded_contig_101879	gi|358485511|ref|NC_006088.3|GGA1	72.87	1725	306	40	648	2274	1496460	1494800	0	967	1755	M
SMAC_Scaffolded_contig_26837	gi|358485511|ref|NC_006088.3|GGA1	78.21	1340	208	24	720	2002	1505062	1503750	0	1068	3	S
SMAC_Scaffolded_contig_613	gi|358485511|ref|NC_006088.3|GGA1	81.5	1189	189	12	612	1782	1507795	1506620	0	1126	3732	M
SMAC_Scaffolded_contig_52267	gi|358485511|ref|NC_006088.3|GGA1	73.32	656	144	11	215	847	1508174	1508821	6e-101	372	1	S
SMAC_Scaffolded_contig_167019	gi|358485511|ref|NC_006088.3|GGA1	82.08	106	19	0	1	106	1509546	1509651	3e-20	105	8	M
SMAC_Scaffolded_contig_62877	gi|358485511|ref|NC_006088.3|GGA1	78.35	97	21	0	386	482	1513695	1513791	6e-13	80	24	M
SMAC_Scaffolded_contig_99964	gi|358485511|ref|NC_006088.3|GGA1	73.51	853	172	18	4281	5095	1517983	1518819	6e-135	488	145	M
SMAC_Scaffolded_contig_103008	gi|358485511|ref|NC_006088.3|GGA1	75.64	1010	203	14	2816	3796	1522888	1521893	0	688	27	M
SMAC_Scaffolded_contig_26782	gi|358485511|ref|NC_006088.3|GGA1	68.02	1604	351	46	2138	3658	1526435	1527959	2e-144	518	51	M
SMAC_Scaffolded_contig_137741	gi|358485511|ref|NC_006088.3|GGA1	70.42	835	188	17	38	841	1528840	1528034	9e-100	369	1	S
SMAC_Scaffolded_contig_65312	gi|358485511|ref|NC_006088.3|GGA1	80.59	407	75	4	1441	1847	1530624	1530222	7e-98	363	3	S
SMAC_Scaffolded_contig_10811	gi|358485511|ref|NC_006088.3|GGA1	75.57	1265	219	22	4007	5246	1538892	1540091	0	870	2190	M
SMAC_Scaffolded_contig_80246	gi|358485511|ref|NC_006088.3|GGA1	72.93	484	118	6	153	634	1543586	1544058	2e-69	268	1	S
SMAC_Scaffolded_contig_127392	gi|358485511|ref|NC_006088.3|GGA1	85.23	650	86	2	2687	3326	1548493	1549142	0	740	6181	M
SMAC_Scaffolded_contig_84267	gi|358485511|ref|NC_006088.3|GGA1	69.42	1017	185	27	2049	3015	1553704	1554644	6e-116	425	5	S
SMAC_Scaffolded_contig_151824	gi|358485511|ref|NC_006088.3|GGA1	76.76	284	51	5	66	341	1557128	1557404	5e-51	206	3	S
SMAC_Scaffolded_contig_151671	gi|358485511|ref|NC_006088.3|GGA1	65.95	749	177	18	194	889	1559316	1558593	4e-46	190	1	S
SMAC_Scaffolded_contig_140301	gi|358485511|ref|NC_006088.3|GGA1	83.09	692	80	9	2536	3219	1564740	1565402	0	713	2	S
SMAC_Scaffolded_contig_142830	gi|358485511|ref|NC_006088.3|GGA1	90.24	41	4	0	997	1037	1565592	1565632	6e-06	57	1768	M
SMAC_Scaffolded_contig_84795	gi|358485511|ref|NC_006088.3|GGA1	71.45	3023	630	60	72	3023	1566146	1569006	0	1501	2	S
SMAC_Scaffolded_contig_82684	gi|358485511|ref|NC_006088.3|GGA1	74.93	766	129	17	392	1124	1575115	1575850	5e-138	497	3387	M
SMAC_Scaffolded_contig_56981	gi|358485511|ref|NC_006088.3|GGA1	77.35	1064	198	15	5991	7025	1643577	1642528	0	803	29	M
SMAC_Scaffolded_contig_108357	gi|358485511|ref|NC_006088.3|GGA1	77.93	589	108	9	241	811	1644303	1643719	7e-126	455	1	S
SMAC_Scaffolded_contig_152907	gi|358485511|ref|NC_006088.3|GGA1	73.65	334	81	2	48	375	1648581	1648249	4e-50	203	1	S
SMAC_Scaffolded_contig_70494	gi|358485511|ref|NC_006088.3|GGA1	72.09	1745	341	40	218	1874	1648769	1650455	0	902	2	S
SMAC_Scaffolded_contig_163280	gi|358485511|ref|NC_006088.3|GGA1	74.75	887	124	10	269	1122	1654032	1654851	5e-180	636	1	S
SMAC_Scaffolded_contig_32205	gi|358485511|ref|NC_006088.3|GGA1	74.26	1018	198	19	1202	2168	1658344	1659348	4e-177	627	2	S
SMAC_Scaffolded_contig_158993	gi|358485511|ref|NC_006088.3|GGA1	78.93	617	93	6	230	844	1660046	1659465	3e-149	533	1	S
SMAC_Scaffolded_contig_85734	gi|358485511|ref|NC_006088.3|GGA1	72.33	412	91	9	526	920	1661126	1661531	9e-52	210	5829	M
SMAC_Scaffolded_contig_172407	gi|358485511|ref|NC_006088.3|GGA1	72.27	238	59	5	170	404	1663126	1663359	5e-24	116	1	S
SMAC_Scaffolded_contig_52509	gi|358485511|ref|NC_006088.3|GGA1	71.97	1859	369	44	6500	8287	1668545	1670322	0	942	2910	M
SMAC_Scaffolded_contig_133466	gi|358485511|ref|NC_006088.3|GGA1	74.09	359	69	8	237	586	1671171	1671514	2e-52	214	11	M
SMAC_Scaffolded_contig_112356	gi|358485511|ref|NC_006088.3|GGA1	70.23	608	131	8	4773	5332	1678575	1677970	4e-75	289	1	S
SMAC_Scaffolded_contig_42131	gi|358485511|ref|NC_006088.3|GGA1	75.04	653	119	13	409	1051	1679774	1680392	2e-116	425	11	M
SMAC_Scaffolded_contig_81295	gi|358485511|ref|NC_006088.3|GGA1	73.54	1954	358	47	6768	8653	1686661	1684799	0	1124	3	S
SMAC_Scaffolded_contig_58059	gi|358485511|ref|NC_006088.3|GGA1	79.27	936	159	12	1252	2160	1692560	1693487	0	791	2	S
SMAC_Scaffolded_contig_85556	gi|358485511|ref|NC_006088.3|GGA1	80.36	443	59	4	407	833	1697739	1697309	3e-113	414	2	S
SMAC_Scaffolded_contig_85557	gi|358485511|ref|NC_006088.3|GGA1	78.21	1427	262	22	715	2115	1699159	1700562	0	1117	2	S
SMAC_Scaffolded_contig_2897	gi|358485511|ref|NC_006088.3|GGA1	82.24	1188	180	16	1300	2468	1704870	1706045	0	1148	2335	M
SMAC_Scaffolded_contig_35841	gi|358485511|ref|NC_006088.3|GGA1	76.41	1149	179	17	1023	2103	1709596	1710720	0	857	11	S
SMAC_Scaffolded_contig_18402	gi|358485511|ref|NC_006088.3|GGA1	72.19	906	180	15	1027	1884	1724924	1724043	2e-137	495	7	M
SMAC_Scaffolded_contig_84641	gi|358485511|ref|NC_006088.3|GGA1	82.54	1054	160	12	4632	5673	1726779	1727820	0	1040	1223	M
SMAC_Scaffolded_contig_51877	gi|358485511|ref|NC_006088.3|GGA1	80.95	1302	185	25	1323	2577	1734300	1733015	0	1175	5	S
SMAC_Scaffolded_contig_24085	gi|358485511|ref|NC_006088.3|GGA1	66.88	1902	472	53	225	2068	1739479	1737678	8e-137	493	19	M
SMAC_Scaffolded_contig_175847	gi|358485511|ref|NC_006088.3|GGA1	78.89	469	78	8	124	576	1741006	1741469	2e-104	383	1	S
SMAC_Scaffolded_contig_26855	gi|358485511|ref|NC_006088.3|GGA1	74.73	918	166	21	755	1646	1745193	1744316	3e-161	574	1	S
SMAC_Scaffolded_contig_26854	gi|358485511|ref|NC_006088.3|GGA1	70.5	1322	260	34	237	1542	1745802	1747009	3e-166	590	2	S
SMAC_Scaffolded_contig_164380	gi|358485511|ref|NC_006088.3|GGA1	69.6	273	49	4	252	521	1749515	1749756	5e-29	132	1	S
SMAC_Scaffolded_contig_103791	gi|358485511|ref|NC_006088.3|GGA1	79.76	746	134	9	1209	1944	1751043	1751781	2e-180	639	317	M
SMAC_Scaffolded_contig_122283	gi|358485511|ref|NC_006088.3|GGA1	75.62	242	36	7	8	229	1753324	1753086	4e-37	159	1	S
SMAC_Scaffolded_contig_58958	gi|358485511|ref|NC_006088.3|GGA1	73.98	488	97	8	81	547	1754196	1754674	9e-79	298	1	S
SMAC_Scaffolded_contig_74750	gi|358485511|ref|NC_006088.3|GGA1	75.36	1043	207	17	1404	2424	1759288	1760302	0	691	5	M
SMAC_Scaffolded_contig_71788	gi|358485511|ref|NC_006088.3|GGA1	75.63	1182	203	22	1880	3008	1766951	1768100	0	810	2866	M
SMAC_Scaffolded_contig_71787	gi|358485511|ref|NC_006088.3|GGA1	73.28	670	159	12	205	870	1773574	1772921	2e-98	365	257	M
SMAC_Scaffolded_contig_102517	gi|358485511|ref|NC_006088.3|GGA1	72.21	457	86	13	887	1320	1775594	1775156	1e-57	230	1	S
SMAC_Scaffolded_contig_148375	gi|358485511|ref|NC_006088.3|GGA1	68.21	1079	179	36	15	1015	1777914	1776922	1e-104	385	1	S
SMAC_Scaffolded_contig_134857	gi|358485511|ref|NC_006088.3|GGA1	71	538	125	12	246	768	1778925	1778404	4e-61	241	85	M
SMAC_Scaffolded_contig_85083	gi|358485511|ref|NC_006088.3|GGA1	71.57	1224	253	28	236	1401	1779334	1780520	1e-168	598	1	S
SMAC_Scaffolded_contig_89726	gi|358485511|ref|NC_006088.3|GGA1	79.6	353	62	7	1249	1593	1785628	1785278	6e-75	289	5	S
SMAC_Scaffolded_contig_116492	gi|358485511|ref|NC_006088.3|GGA1	68.98	1338	318	34	1128	2425	1788588	1787308	6e-132	477	2	S
SMAC_Scaffolded_contig_72720	gi|358485511|ref|NC_006088.3|GGA1	74.46	1167	210	28	89	1193	1798018	1796878	0	715	2	S
SMAC_Scaffolded_contig_71920	gi|358485511|ref|NC_006088.3|GGA1	74.2	2136	411	42	4889	6934	1798186	1800271	0	1305	729	M
SMAC_Scaffolded_contig_120576	gi|358485511|ref|NC_006088.3|GGA1	67.49	926	203	24	986	1856	1802107	1802989	1e-76	293	7256	M
SMAC_Scaffolded_contig_59518	gi|358485511|ref|NC_006088.3|GGA1	74.31	1090	174	32	2067	3088	1806579	1805528	0	655	4850	M
SMAC_Scaffolded_contig_31201	gi|358485511|ref|NC_006088.3|GGA1	72.36	322	69	9	91	400	1810418	1810105	3e-36	158	2	S
SMAC_Scaffolded_contig_103618	gi|358485511|ref|NC_006088.3|GGA1	81.3	230	38	3	220	448	1812481	1812706	9e-53	212	287	M
SMAC_Scaffolded_contig_40065	gi|358485511|ref|NC_006088.3|GGA1	71.21	1358	258	31	260	1529	1814124	1815436	0	666	1	S
SMAC_Scaffolded_contig_52550	gi|358485511|ref|NC_006088.3|GGA1	67.03	1298	333	34	1085	2343	1819309	1818068	1e-91	343	2	S
SMAC_Scaffolded_contig_52549	gi|358485511|ref|NC_006088.3|GGA1	80.93	236	37	6	40	272	1821354	1821584	1e-49	203	19	M
SMAC_Scaffolded_contig_30035	gi|358485511|ref|NC_006088.3|GGA1	71.14	2852	557	57	5331	8001	1825953	1823187	0	1416	2	S
SMAC_Scaffolded_contig_105601	gi|358485511|ref|NC_006088.3|GGA1	71.19	545	117	11	346	861	1826610	1827143	7e-68	262	1	S
SMAC_Scaffolded_contig_107296	gi|358485511|ref|NC_006088.3|GGA1	70.06	825	182	18	463	1274	1837115	1836343	8e-95	352	1	S
SMAC_Scaffolded_contig_45727	gi|358485511|ref|NC_006088.3|GGA1	79.02	1249	212	21	87	1298	1845570	1846805	0	1021	1	S
SMAC_Scaffolded_contig_115525	gi|358485511|ref|NC_006088.3|GGA1	89.36	47	3	1	3	47	1847447	1847401	3e-07	60	6023	M
SMAC_Scaffolded_contig_68372	gi|358485511|ref|NC_006088.3|GGA1	74.34	1446	267	39	224	1615	1847808	1849203	0	854	1	S
SMAC_Scaffolded_contig_62229	gi|358485511|ref|NC_006088.3|GGA1	81.14	1453	223	15	3864	5289	1874581	1876009	0	1364	5	M
SMAC_Scaffolded_contig_154445	gi|358485511|ref|NC_006088.3|GGA1	77.68	560	98	12	77	613	1877152	1877707	1e-114	417	13	M
SMAC_Scaffolded_contig_150707	gi|358485511|ref|NC_006088.3|GGA1	96.77	31	1	0	6681	6711	1877227	1877257	0.002	51	37	M
SMAC_Scaffolded_contig_67433	gi|358485511|ref|NC_006088.3|GGA1	74.17	600	137	8	67	658	1883957	1883368	1e-97	363	9	M
SMAC_Scaffolded_contig_44751	gi|358485511|ref|NC_006088.3|GGA1	80.03	766	118	9	2680	3438	1886187	1885450	0	682	51	M
SMAC_Scaffolded_contig_134529	gi|358485511|ref|NC_006088.3|GGA1	81.65	485	42	3	8	490	1888059	1888498	2e-140	502	1	S
SMAC_Scaffolded_contig_50979	gi|358485511|ref|NC_006088.3|GGA1	70.76	749	148	15	651	1370	1891806	1892512	8e-97	360	1341	M
SMAC_Scaffolded_contig_68191	gi|358485511|ref|NC_006088.3|GGA1	75.13	1492	287	29	163	1606	1896474	1895019	0	964	3	S
SMAC_Scaffolded_contig_162722	gi|358485511|ref|NC_006088.3|GGA1	77.03	222	41	2	261	482	1896675	1896886	3e-40	170	1	S
SMAC_Scaffolded_contig_83662	gi|358485511|ref|NC_006088.3|GGA1	75.78	1119	185	18	29	1090	1898642	1899731	0	792	1	S
SMAC_Scaffolded_contig_75224	gi|358485511|ref|NC_006088.3|GGA1	77.75	845	156	10	186	1010	1901566	1902398	0	661	1	S
SMAC_Scaffolded_contig_113288	gi|358485511|ref|NC_006088.3|GGA1	70.67	525	122	11	53	552	1902412	1902929	9e-59	232	1	S
SMAC_Scaffolded_contig_117968	gi|358485511|ref|NC_006088.3|GGA1	75.41	1102	222	14	63	1119	1904028	1902931	0	747	1	S
SMAC_Scaffolded_contig_49766	gi|358485511|ref|NC_006088.3|GGA1	75.53	1426	258	27	70	1445	1904044	1905428	0	958	2	S
SMAC_Scaffolded_contig_170970	gi|358485511|ref|NC_006088.3|GGA1	72.88	118	30	2	292	408	1914395	1914511	7e-08	62	798	M
SMAC_Scaffolded_contig_113264	gi|358485511|ref|NC_006088.3|GGA1	72.15	984	206	25	4877	5825	1918435	1919385	7e-135	488	50	M
SMAC_Scaffolded_contig_126611	gi|358485511|ref|NC_006088.3|GGA1	72.79	680	133	17	2280	2921	1923811	1923146	2e-97	363	5	S
SMAC_Scaffolded_contig_126612	gi|358485511|ref|NC_006088.3|GGA1	74.03	154	35	4	3	152	1928321	1928473	2e-13	84	10	M
SMAC_Scaffolded_contig_145184	gi|358485511|ref|NC_006088.3|GGA1	91.09	101	8	1	1264	1363	1929778	1929878	3e-30	138	1	S
SMAC_Scaffolded_contig_57918	gi|358485511|ref|NC_006088.3|GGA1	71.46	473	103	10	4473	4919	1931172	1930706	1e-56	228	105	M
SMAC_Scaffolded_contig_116809	gi|358485511|ref|NC_006088.3|GGA1	70.29	1380	285	31	43	1325	1933418	1932067	6e-173	614	1	S
SMAC_Scaffolded_contig_4278	gi|358485511|ref|NC_006088.3|GGA1	86.49	37	5	0	708	744	1938163	1938199	0.041	44	71	M
SMAC_Scaffolded_contig_63056	gi|358485511|ref|NC_006088.3|GGA1	70.7	1157	261	30	196	1301	1938194	1937065	8e-137	493	2	S
SMAC_Scaffolded_contig_130619	gi|358485511|ref|NC_006088.3|GGA1	78.24	170	28	6	354	521	1946657	1946819	3e-25	122	1	S
SMAC_Scaffolded_contig_60266	gi|358485511|ref|NC_006088.3|GGA1	73.62	1084	219	23	267	1319	1975680	1974633	3e-176	623	1	S
SMAC_Scaffolded_contig_66613	gi|358485511|ref|NC_006088.3|GGA1	81.9	442	71	6	884	1320	1977801	1978238	2e-114	417	142	M
SMAC_Scaffolded_contig_86541	gi|358485511|ref|NC_006088.3|GGA1	75.69	473	88	6	5325	5778	1980752	1981216	3e-88	333	50	M
SMAC_Scaffolded_contig_109119	gi|358485511|ref|NC_006088.3|GGA1	75.2	746	140	14	69	774	1981282	1982022	4e-136	489	1	S
SMAC_Scaffolded_contig_21164	gi|358485511|ref|NC_006088.3|GGA1	80.94	724	96	11	6078	6792	1987151	1986461	0	672	4697	M
SMAC_Scaffolded_contig_74116	gi|358485511|ref|NC_006088.3|GGA1	78.29	1575	260	22	710	2245	1993337	1991806	0	1274	13001	M
SMAC_Scaffolded_contig_84532	gi|358485511|ref|NC_006088.3|GGA1	76.65	771	142	11	382	1126	1994225	1994983	2e-158	563	1	S
SMAC_Scaffolded_contig_70120	gi|358485511|ref|NC_006088.3|GGA1	75.03	753	132	18	74	777	1998154	1998899	3e-133	480	2	S
SMAC_Scaffolded_contig_129336	gi|358485511|ref|NC_006088.3|GGA1	78.49	172	34	2	416	584	2000885	2001056	3e-30	138	1	S
SMAC_Scaffolded_contig_61732	gi|358485511|ref|NC_006088.3|GGA1	77.61	1907	349	27	272	2126	2007251	2005371	0	1463	10715	M
SMAC_Scaffolded_contig_42868	gi|358485511|ref|NC_006088.3|GGA1	76.08	715	147	12	242	949	2007951	2007254	3e-134	486	4	S
SMAC_Scaffolded_contig_126030	gi|358485511|ref|NC_006088.3|GGA1	71.77	581	117	18	509	1065	2008848	2009405	9e-70	269	138	M
SMAC_Scaffolded_contig_165394	gi|358485511|ref|NC_006088.3|GGA1	82.76	319	38	4	362	680	2014853	2015154	5e-87	325	2	S
SMAC_Scaffolded_contig_149724	gi|358485511|ref|NC_006088.3|GGA1	70.44	318	66	10	20	327	2015638	2015339	2e-28	131	123	M
SMAC_Scaffolded_contig_74769	gi|358485511|ref|NC_006088.3|GGA1	74.85	660	132	15	285	923	2017876	2018522	1e-110	405	1	S
SMAC_Scaffolded_contig_135365	gi|358485511|ref|NC_006088.3|GGA1	73.54	1236	238	29	337	1513	2020496	2019291	0	704	11139	M
SMAC_Scaffolded_contig_88669	gi|358485511|ref|NC_006088.3|GGA1	76.53	409	66	8	391	779	2024008	2024406	4e-78	297	1	S
SMAC_Scaffolded_contig_184750	gi|358485511|ref|NC_006088.3|GGA1	66.93	387	76	13	201	560	2026083	2026444	6e-22	109	30	M
SMAC_Scaffolded_contig_182914	gi|358485511|ref|NC_006088.3|GGA1	91.49	47	4	0	1102	1148	2034762	2034808	4e-09	68	25595	M
SMAC_Scaffolded_contig_72222	gi|358485511|ref|NC_006088.3|GGA1	77.55	1029	177	23	19725	20727	2035046	2036046	0	760	7172	M
SMAC_Scaffolded_contig_2771	gi|358485511|ref|NC_006088.3|GGA1	79.29	1487	227	23	1591	3008	2037847	2039321	0	1263	569	M
SMAC_Scaffolded_contig_77040	gi|358485511|ref|NC_006088.3|GGA1	80.23	1548	252	20	138	1650	2041626	2040098	0	1371	420	M
SMAC_Scaffolded_contig_101806	gi|358485511|ref|NC_006088.3|GGA1	75.42	1322	221	32	4090	5340	2043224	2041936	0	868	3741	M
SMAC_Scaffolded_contig_58082	gi|358485511|ref|NC_006088.3|GGA1	75.49	1277	222	30	7420	8644	2047916	2046679	0	839	10803	M
SMAC_Scaffolded_contig_54638	gi|358485511|ref|NC_006088.3|GGA1	78.09	1319	222	20	154	1418	2060689	2059384	0	1047	6	M
SMAC_Scaffolded_contig_64019	gi|358485511|ref|NC_006088.3|GGA1	79.56	1683	270	28	9526	11172	2067507	2069151	0	1425	26	M
SMAC_Scaffolded_contig_66627	gi|358485511|ref|NC_006088.3|GGA1	65.98	244	53	5	3	233	2071136	2070910	2e-10	71	53	M
SMAC_Scaffolded_contig_34988	gi|358485511|ref|NC_006088.3|GGA1	74.97	1750	322	37	1805	3480	2073898	2075605	0	1119	997	M
SMAC_Scaffolded_contig_44481	gi|358485511|ref|NC_006088.3|GGA1	70.32	711	137	21	29	703	2082022	2082694	3e-80	304	5	M
SMAC_Scaffolded_contig_167860	gi|358485511|ref|NC_006088.3|GGA1	71.55	362	72	12	25	374	2091153	2091495	3e-38	163	2	M
SMAC_Scaffolded_contig_53500	gi|358485511|ref|NC_006088.3|GGA1	80.86	1703	261	19	6334	8002	2092222	2093893	0	1575	6	S
SMAC_Scaffolded_contig_44017	gi|358485511|ref|NC_006088.3|GGA1	79.38	2794	433	32	10511	13195	2097906	2095147	0	2426	5896	M
SMAC_Scaffolded_contig_67117	gi|358485511|ref|NC_006088.3|GGA1	69.93	459	99	18	559	987	2098508	2098957	1e-36	159	67	M
SMAC_Scaffolded_contig_17783	gi|358485511|ref|NC_006088.3|GGA1	72.72	843	155	22	500	1283	2102717	2101891	2e-124	452	2	S
SMAC_Scaffolded_contig_82102	gi|358485511|ref|NC_006088.3|GGA1	79.53	762	122	11	1	736	2108445	2107692	0	652	2	S
SMAC_Scaffolded_contig_35869	gi|358485511|ref|NC_006088.3|GGA1	68.42	323	78	4	1	311	2109370	2109060	3e-27	127	38	M
SMAC_Scaffolded_contig_35870	gi|358485511|ref|NC_006088.3|GGA1	70.4	1250	261	35	3478	4684	2113069	2114252	8e-147	527	4	S
SMAC_Scaffolded_contig_8987	gi|358485511|ref|NC_006088.3|GGA1	72.93	628	112	15	862	1472	2117603	2117017	3e-94	351	2	S
SMAC_Scaffolded_contig_8986	gi|358485511|ref|NC_006088.3|GGA1	74.62	1438	264	29	3259	4665	2123344	2124711	0	908	7	S
SMAC_Scaffolded_contig_45392	gi|358485511|ref|NC_006088.3|GGA1	72.85	803	188	15	1099	1884	2129212	2128423	3e-116	425	13	M
SMAC_Scaffolded_contig_31934	gi|358485511|ref|NC_006088.3|GGA1	77.81	1289	204	22	1211	2441	2132307	2133571	0	1011	422	M
SMAC_Scaffolded_contig_181235	gi|358485511|ref|NC_006088.3|GGA1	78.09	534	106	6	2	528	2133643	2134172	4e-115	419	25	M
SMAC_Scaffolded_contig_92301	gi|358485511|ref|NC_006088.3|GGA1	73.78	1476	273	27	860	2266	2141185	2139755	0	899	5	S
SMAC_Scaffolded_contig_25145	gi|358485511|ref|NC_006088.3|GGA1	81.62	1126	166	15	4571	5666	2147424	2148538	0	1067	11	M
SMAC_Scaffolded_contig_34121	gi|358485511|ref|NC_006088.3|GGA1	76.09	732	149	9	123	838	2158226	2157505	2e-143	515	1	S
SMAC_Scaffolded_contig_82265	gi|358485511|ref|NC_006088.3|GGA1	79.17	576	100	10	294	865	2165367	2165926	9e-131	471	5	M
SMAC_Scaffolded_contig_71536	gi|358485511|ref|NC_006088.3|GGA1	81.69	2004	296	23	6647	8618	2168255	2166291	0	1920	8	S
SMAC_Scaffolded_contig_100064	gi|358485511|ref|NC_006088.3|GGA1	68.35	1387	280	34	23	1332	2172501	2171197	4e-143	513	1	S
SMAC_Scaffolded_contig_52220	gi|358485511|ref|NC_006088.3|GGA1	76.97	1754	280	38	1072	2757	2179561	2181258	0	1283	9876	M
SMAC_Scaffolded_contig_3028	gi|358485511|ref|NC_006088.3|GGA1	76.57	1468	272	19	9902	11341	2184752	2186175	0	1076	96	M
SMAC_Scaffolded_contig_6277	gi|358485511|ref|NC_006088.3|GGA1	83.1	1195	167	12	7628	8801	2191588	2192768	0	1222	5116	M
SMAC_Scaffolded_contig_32910	gi|358485511|ref|NC_006088.3|GGA1	73.13	2479	353	64	14845	17231	2202380	2200123	0	1462	9939	M
SMAC_Scaffolded_contig_95129	gi|358485511|ref|NC_006088.3|GGA1	70.77	195	36	3	1	178	2208624	2208814	5e-19	100	45	M
SMAC_Scaffolded_contig_84043	gi|358485511|ref|NC_006088.3|GGA1	74	800	139	19	109	890	2216807	2217555	7e-134	482	1	S
SMAC_Scaffolded_contig_16104	gi|358485511|ref|NC_006088.3|GGA1	80.64	4483	635	52	5059	9405	2230366	2225981	0	4147	10621	M
SMAC_Scaffolded_contig_162422	gi|358485511|ref|NC_006088.3|GGA1	73.73	510	120	9	95	601	2233379	2233877	1e-75	288	1	S
SMAC_Scaffolded_contig_55148	gi|358485511|ref|NC_006088.3|GGA1	72.15	1052	187	24	2051	3024	2235914	2234891	6e-158	563	3	S
SMAC_Scaffolded_contig_55149	gi|358485511|ref|NC_006088.3|GGA1	70.11	957	179	24	106	1014	2238271	2239168	1e-116	425	1	S
SMAC_Scaffolded_contig_45460	gi|358485511|ref|NC_006088.3|GGA1	74.91	3718	692	75	1152	4747	2259700	2256102	0	2378	8	S
SMAC_Scaffolded_contig_159848	gi|358485511|ref|NC_006088.3|GGA1	74.9	239	48	4	116	351	2261762	2261991	2e-35	154	1	S
SMAC_Scaffolded_contig_13321	gi|358485511|ref|NC_006088.3|GGA1	72.18	1481	270	33	2624	3996	2264868	2266314	0	792	4	S
SMAC_Scaffolded_contig_129117	gi|358485511|ref|NC_006088.3|GGA1	72.8	614	135	14	3	598	2267942	2267343	3e-85	320	1	S
SMAC_Scaffolded_contig_100026	gi|358485511|ref|NC_006088.3|GGA1	67.92	1328	283	32	266	1534	2270750	2269507	1e-126	459	2	S
SMAC_Scaffolded_contig_84348	gi|358485511|ref|NC_006088.3|GGA1	77.54	276	56	4	142	411	2273060	2272785	3e-51	206	1005	M
SMAC_Scaffolded_contig_84349	gi|358485511|ref|NC_006088.3|GGA1	76.72	726	117	16	33	729	2273062	2273764	1e-145	522	2	S
SMAC_Scaffolded_contig_31180	gi|358485511|ref|NC_006088.3|GGA1	69.78	2164	432	53	1014	3102	2275881	2277897	0	915	2	S
SMAC_Scaffolded_contig_7927	gi|358485511|ref|NC_006088.3|GGA1	71.44	1789	344	39	1864	3572	2279963	2278262	0	897	1075	M
SMAC_Scaffolded_contig_172010	gi|358485511|ref|NC_006088.3|GGA1	81.21	431	74	4	4632	5059	2281642	2282068	7e-109	401	1	S
SMAC_Scaffolded_contig_120197	gi|358485511|ref|NC_006088.3|GGA1	73.05	1388	250	29	1523	2846	2287405	2288732	0	798	7652	M
SMAC_Scaffolded_contig_56429	gi|358485511|ref|NC_006088.3|GGA1	83.03	866	128	7	5187	6044	2296367	2295513	0	884	8673	M
SMAC_Scaffolded_contig_137088	gi|358485511|ref|NC_006088.3|GGA1	77.18	206	43	2	324	527	2302931	2302728	2e-35	154	2	S
SMAC_Scaffolded_contig_65752	gi|358485511|ref|NC_006088.3|GGA1	74.24	691	129	11	351	994	2304809	2304121	9e-121	439	1051	M
SMAC_Scaffolded_contig_65751	gi|358485511|ref|NC_006088.3|GGA1	69.35	1860	364	54	171	1935	2305321	2307069	0	728	10584	M
SMAC_Scaffolded_contig_1240	gi|358485511|ref|NC_006088.3|GGA1	69.21	3456	735	90	1365	4636	2317571	2314261	0	1326	3512	M
SMAC_Scaffolded_contig_99184	gi|358485511|ref|NC_006088.3|GGA1	72.04	633	113	12	84	653	2319660	2319029	2e-93	347	1	S
SMAC_Scaffolded_contig_99185	gi|358485511|ref|NC_006088.3|GGA1	78	1591	282	27	381	1946	2320438	2321985	0	1231	6	S
SMAC_Scaffolded_contig_115715	gi|358485511|ref|NC_006088.3|GGA1	77.2	421	76	3	99	499	2333709	2334129	1e-88	331	2000	M
SMAC_Scaffolded_contig_9287	gi|358485511|ref|NC_006088.3|GGA1	73.77	2958	589	51	298	3164	2352670	2349809	0	1775	16442	M
SMAC_Scaffolded_contig_105168	gi|358485511|ref|NC_006088.3|GGA1	74.48	1536	248	24	166	1633	2359811	2358352	0	1025	1	S
SMAC_Scaffolded_contig_35687	gi|358485511|ref|NC_006088.3|GGA1	76.17	1725	243	30	3207	4780	2364379	2362672	0	1274	14634	M
SMAC_Scaffolded_contig_74332	gi|358485511|ref|NC_006088.3|GGA1	77.65	1105	192	10	2110	3179	2371998	2373082	0	884	3	S
SMAC_Scaffolded_contig_101176	gi|358485511|ref|NC_006088.3|GGA1	79.83	1185	199	12	240	1388	2374070	2375250	0	1041	12998	M
SMAC_Scaffolded_contig_128014	gi|358485511|ref|NC_006088.3|GGA1	84.48	1121	160	9	2003	3116	2378779	2377666	0	1209	4	S
SMAC_Scaffolded_contig_94868	gi|358485511|ref|NC_006088.3|GGA1	75.6	209	44	2	397	599	2381503	2381296	2e-32	145	208	M
SMAC_Scaffolded_contig_94869	gi|358485511|ref|NC_006088.3|GGA1	74.77	1316	264	19	1347	2598	2384047	2385358	0	852	13	M
SMAC_Scaffolded_contig_7585	gi|358485511|ref|NC_006088.3|GGA1	77.05	1002	186	17	5084	6068	2390288	2391262	0	733	7	S
SMAC_Scaffolded_contig_3160	gi|358485511|ref|NC_006088.3|GGA1	74.83	596	118	13	572	1144	2392618	2393204	9e-100	369	1109	M
SMAC_Scaffolded_contig_150160	gi|358485511|ref|NC_006088.3|GGA1	80.82	73	12	1	68	140	2394615	2394685	3e-08	66	3729	M
SMAC_Scaffolded_contig_13222	gi|358485511|ref|NC_006088.3|GGA1	73.98	638	134	11	2103	2726	2397397	2396778	3e-103	381	2	S
SMAC_Scaffolded_contig_3145	gi|358485511|ref|NC_006088.3|GGA1	83.15	718	98	9	4318	5016	2402189	2401476	0	729	380	M
SMAC_Scaffolded_contig_124455	gi|358485511|ref|NC_006088.3|GGA1	72.83	633	127	10	811	1422	2406513	2407121	2e-97	361	3	S
SMAC_Scaffolded_contig_123080	gi|358485511|ref|NC_006088.3|GGA1	90.91	33	2	1	613	644	2409026	2409058	0.099	42	20	M
SMAC_Scaffolded_contig_59989	gi|358485511|ref|NC_006088.3|GGA1	74.15	1648	305	39	2386	3955	2417052	2418656	0	985	9357	M
SMAC_Scaffolded_contig_63766	gi|358485511|ref|NC_006088.3|GGA1	74.15	1648	305	39	847	2416	2418656	2417052	0	985	625	M
SMAC_Scaffolded_contig_113663	gi|358485511|ref|NC_006088.3|GGA1	73.25	385	92	5	77	457	2420973	2421350	3e-54	217	1	S
SMAC_Scaffolded_contig_71822	gi|358485511|ref|NC_006088.3|GGA1	75.31	81	20	0	240	320	2426231	2426311	4e-06	57	22	M
SMAC_Scaffolded_contig_24449	gi|358485511|ref|NC_006088.3|GGA1	79.44	681	97	13	631	1278	2429551	2428881	2e-162	578	2	S
SMAC_Scaffolded_contig_24448	gi|358485511|ref|NC_006088.3|GGA1	75.44	1637	297	32	10706	12307	2435994	2437560	0	1090	4548	M
SMAC_Scaffolded_contig_53244	gi|358485511|ref|NC_006088.3|GGA1	72.82	1100	208	21	10362	11418	2438328	2439379	3e-175	623	10	M
SMAC_Scaffolded_contig_68951	gi|358485511|ref|NC_006088.3|GGA1	72.24	1549	324	37	911	2419	2440506	2441988	0	783	413	M
SMAC_Scaffolded_contig_68950	gi|358485511|ref|NC_006088.3|GGA1	78.5	856	148	14	378	1216	2444392	2445228	0	684	4364	M
SMAC_Scaffolded_contig_67764	gi|358485511|ref|NC_006088.3|GGA1	81.42	888	134	12	699	1580	2448532	2447670	0	832	635	M
SMAC_Scaffolded_contig_5618	gi|358485511|ref|NC_006088.3|GGA1	74.55	664	130	8	4380	5022	2450134	2449489	3e-119	435	1	S
SMAC_Scaffolded_contig_119566	gi|358485511|ref|NC_006088.3|GGA1	82.91	556	84	7	632	1177	2451182	2450628	5e-155	553	1426	M
SMAC_Scaffolded_contig_90240	gi|358485511|ref|NC_006088.3|GGA1	67.55	866	193	20	1141	1935	2452754	2451906	5e-74	284	1	S
SMAC_Scaffolded_contig_85035	gi|358485511|ref|NC_006088.3|GGA1	73.43	1178	211	26	219	1316	2456879	2455724	0	688	3	S
SMAC_Scaffolded_contig_44492	gi|358485511|ref|NC_006088.3|GGA1	73.86	1358	259	29	576	1888	2457775	2459081	0	805	12025	M
SMAC_Scaffolded_contig_93774	gi|358485511|ref|NC_006088.3|GGA1	87.5	32	4	0	4790	4821	2467619	2467650	2.4	41	4	M
SMAC_Scaffolded_contig_54126	gi|358485511|ref|NC_006088.3|GGA1	73.76	1395	235	30	3608	4951	2471195	2472509	0	848	15840	M
SMAC_Scaffolded_contig_179	gi|358485511|ref|NC_006088.3|GGA1	74.9	1510	263	33	14819	16249	2478622	2477150	0	971	11930	M
SMAC_Scaffolded_contig_178	gi|358485511|ref|NC_006088.3|GGA1	74.9	1036	186	13	5779	6793	2483651	2484633	0	704	1283	M
SMAC_Scaffolded_contig_2520	gi|358485511|ref|NC_006088.3|GGA1	79.57	514	80	4	1773	2278	2488607	2489103	1e-126	459	963	M
SMAC_Scaffolded_contig_13833	gi|358485511|ref|NC_006088.3|GGA1	73.74	2970	581	58	2643	5478	2492985	2490081	0	1757	6763	M
SMAC_Scaffolded_contig_63149	gi|358485511|ref|NC_006088.3|GGA1	69.31	4350	877	110	2406	6531	2501038	2496923	0	1743	16874	M
SMAC_Scaffolded_contig_118711	gi|358485511|ref|NC_006088.3|GGA1	73.96	480	85	8	78	542	2507240	2506786	2e-79	302	2	S
SMAC_Scaffolded_contig_67355	gi|358485511|ref|NC_006088.3|GGA1	71.32	652	117	11	70	656	2508808	2508162	2e-93	347	213	M
SMAC_Scaffolded_contig_151840	gi|358485511|ref|NC_006088.3|GGA1	75.71	280	61	4	165	440	2511948	2512224	3e-45	187	132	M
SMAC_Scaffolded_contig_11831	gi|358485511|ref|NC_006088.3|GGA1	85.55	526	65	7	155	670	2513521	2512997	6e-165	585	2	S
SMAC_Scaffolded_contig_11830	gi|358485511|ref|NC_006088.3|GGA1	71.99	996	193	19	1738	2691	2515733	2516684	4e-148	531	363	M
SMAC_Scaffolded_contig_51697	gi|358485511|ref|NC_006088.3|GGA1	77.99	895	142	12	481	1367	2518932	2519779	0	722	2	S
SMAC_Scaffolded_contig_31420	gi|358485511|ref|NC_006088.3|GGA1	73.48	2025	425	38	81	2049	2523752	2521784	0	1160	64	M
SMAC_Scaffolded_contig_47794	gi|358485511|ref|NC_006088.3|GGA1	73.85	566	126	12	4367	4919	2524998	2524442	2e-84	320	4222	M
SMAC_Scaffolded_contig_2463	gi|358485511|ref|NC_006088.3|GGA1	73.22	2438	412	55	6248	8534	2527679	2525332	0	1422	3455	M
SMAC_Scaffolded_contig_12448	gi|358485511|ref|NC_006088.3|GGA1	74.07	3209	598	70	123	3188	2538862	2541979	0	1932	27616	M
SMAC_Scaffolded_contig_51220	gi|358485511|ref|NC_006088.3|GGA1	74.97	875	195	10	47	906	2538866	2538001	6e-159	567	5	S
SMAC_Scaffolded_contig_53513	gi|358485511|ref|NC_006088.3|GGA1	75.62	812	144	16	131	906	2546367	2547160	4e-154	549	1	S
SMAC_Scaffolded_contig_69511	gi|358485511|ref|NC_006088.3|GGA1	71.3	2641	546	45	1050	3593	2548765	2551290	0	1333	15829	M
SMAC_Scaffolded_contig_70672	gi|358485511|ref|NC_006088.3|GGA1	74.9	2179	356	50	3228	5338	2555034	2557089	0	1411	3	S
SMAC_Scaffolded_contig_12437	gi|358485511|ref|NC_006088.3|GGA1	72.65	2472	475	46	3093	5460	2560672	2558298	0	1384	1710	M
SMAC_Scaffolded_contig_151042	gi|358485511|ref|NC_006088.3|GGA1	89.47	38	3	1	739	775	2566842	2566805	0.003	48	77	M
SMAC_Scaffolded_contig_12436	gi|358485511|ref|NC_006088.3|GGA1	80.43	1753	285	10	3802	5512	2567114	2568850	0	1622	2034	M
SMAC_Scaffolded_contig_11040	gi|358485511|ref|NC_006088.3|GGA1	69.87	1905	364	43	9231	11055	2582127	2583901	0	843	715	M
SMAC_Scaffolded_contig_86502	gi|358485511|ref|NC_006088.3|GGA1	79.16	2150	377	25	127	2231	2588456	2586333	0	1810	1	S
SMAC_Scaffolded_contig_154043	gi|358485511|ref|NC_006088.3|GGA1	78.6	715	134	9	374	1072	2589272	2589983	3e-162	576	1	S
SMAC_Scaffolded_contig_116137	gi|358485511|ref|NC_006088.3|GGA1	75.81	678	142	12	1137	1802	2591119	2590452	6e-124	450	22	M
SMAC_Scaffolded_contig_90475	gi|358485511|ref|NC_006088.3|GGA1	72.78	2807	533	56	3809	6572	2597100	2594482	0	1573	1385	M
SMAC_Scaffolded_contig_31776	gi|358485511|ref|NC_006088.3|GGA1	74	1719	297	40	234	1917	2600484	2602087	0	1040	6338	M
SMAC_Scaffolded_contig_3914	gi|358485511|ref|NC_006088.3|GGA1	72.28	1371	275	19	12681	13990	2611559	2610233	0	769	15489	M
SMAC_Scaffolded_contig_107823	gi|358485511|ref|NC_006088.3|GGA1	67.72	604	165	13	303	890	2617925	2617336	1e-42	179	762	M
SMAC_Scaffolded_contig_141953	gi|358485511|ref|NC_006088.3|GGA1	74.07	883	166	11	71	927	2624027	2623182	1e-159	567	1	S
SMAC_Scaffolded_contig_95901	gi|358485511|ref|NC_006088.3|GGA1	78.7	540	82	7	674	1205	2627577	2628091	6e-125	453	5570	M
SMAC_Scaffolded_contig_119612	gi|358485511|ref|NC_006088.3|GGA1	74.46	325	70	5	1	321	2628822	2628507	1e-48	201	4	M
SMAC_Scaffolded_contig_81494	gi|358485511|ref|NC_006088.3|GGA1	72.89	2088	388	42	227	2200	2632375	2630352	0	1186	4097	M
SMAC_Scaffolded_contig_121065	gi|358485511|ref|NC_006088.3|GGA1	73.76	442	76	15	28	456	2632628	2633042	4e-64	250	1	S
SMAC_Scaffolded_contig_46777	gi|358485511|ref|NC_006088.3|GGA1	76.81	2609	473	40	977	3526	2638970	2636435	0	1916	5	M
SMAC_Scaffolded_contig_127186	gi|358485511|ref|NC_006088.3|GGA1	90.13	314	23	3	243	548	2640460	2640773	7e-116	421	1	S
SMAC_Scaffolded_contig_139931	gi|358485511|ref|NC_006088.3|GGA1	74.37	597	120	9	997	1588	2646001	2646569	9e-102	376	8	M
SMAC_Scaffolded_contig_41634	gi|358485511|ref|NC_006088.3|GGA1	79.62	2807	398	35	1	2669	2649502	2646732	0	2482	6	M
SMAC_Scaffolded_contig_41635	gi|358485511|ref|NC_006088.3|GGA1	79.41	1156	174	23	1	1104	2649539	2650682	0	966	16826	M
SMAC_Scaffolded_contig_164753	gi|358485511|ref|NC_006088.3|GGA1	100	23	0	0	12	34	2650714	2650736	0.087	42	31	M
SMAC_Scaffolded_contig_133273	gi|358485511|ref|NC_006088.3|GGA1	83.56	1046	115	19	1	1034	2654083	2653083	0	1077	1	S
SMAC_Scaffolded_contig_56510	gi|358485511|ref|NC_006088.3|GGA1	71.99	1892	343	25	174	1932	2662288	2660451	0	1079	6	S
SMAC_Scaffolded_contig_91313	gi|358485511|ref|NC_006088.3|GGA1	71.08	1103	258	26	1523	2589	2670609	2669532	2e-135	489	5	M
SMAC_Scaffolded_contig_59998	gi|358485511|ref|NC_006088.3|GGA1	74.43	571	107	6	329	873	2674481	2675038	4e-103	379	1	S
SMAC_Scaffolded_contig_76103	gi|358485511|ref|NC_006088.3|GGA1	78.71	1118	179	15	61	1130	2680166	2681272	0	930	2	M
SMAC_Scaffolded_contig_22178	gi|358485511|ref|NC_006088.3|GGA1	73.27	2222	424	45	8574	10744	2683057	2685159	0	1279	428	M
SMAC_Scaffolded_contig_101493	gi|358485511|ref|NC_006088.3|GGA1	82.59	563	72	5	2303	2839	2690041	2689479	3e-161	574	2	S
SMAC_Scaffolded_contig_76737	gi|358485511|ref|NC_006088.3|GGA1	72.23	965	191	24	253	1174	2694120	2693190	5e-137	493	1	S
SMAC_Scaffolded_contig_40383	gi|358485511|ref|NC_006088.3|GGA1	79.56	1634	277	17	10982	12566	2708600	2710225	0	1416	2807	M
SMAC_Scaffolded_contig_25104	gi|358485511|ref|NC_006088.3|GGA1	70.02	994	209	23	2168	3092	2713348	2714321	1e-116	426	4	S
SMAC_Scaffolded_contig_97549	gi|358485511|ref|NC_006088.3|GGA1	74.36	2898	574	45	538	3329	2719575	2716741	0	1826	4284	M
SMAC_Scaffolded_contig_94572	gi|358485511|ref|NC_006088.3|GGA1	74.72	1088	201	24	1	1037	2720337	2721401	0	708	14	M
SMAC_Scaffolded_contig_109248	gi|358485511|ref|NC_006088.3|GGA1	81.95	482	76	6	799	1278	2722209	2721737	2e-127	461	1	S
SMAC_Scaffolded_contig_96976	gi|358485511|ref|NC_006088.3|GGA1	69.91	1715	349	32	611	2217	2761581	2759926	0	773	7	S
SMAC_Scaffolded_contig_65608	gi|358485511|ref|NC_006088.3|GGA1	81.87	910	122	10	283	1171	2763012	2763899	0	892	4753	M
SMAC_Scaffolded_contig_6010	gi|358485511|ref|NC_006088.3|GGA1	70.49	3487	719	77	651	3945	2792219	2788851	0	1582	4156	M
SMAC_Scaffolded_contig_6033	gi|358485511|ref|NC_006088.3|GGA1	79.67	1092	136	21	14773	15833	2810803	2811839	0	951	12867	M
SMAC_Scaffolded_contig_2356	gi|358485511|ref|NC_006088.3|GGA1	78.37	1304	240	23	8331	9611	2819130	2817846	0	1014	9579	M
SMAC_Scaffolded_contig_58997	gi|358485511|ref|NC_006088.3|GGA1	75.88	2160	407	35	2470	4584	2827551	2829641	0	1492	40	M
SMAC_Scaffolded_contig_28649	gi|358485511|ref|NC_006088.3|GGA1	69.59	1766	354	40	1101	2723	2832975	2831250	0	749	2	S
SMAC_Scaffolded_contig_18067	gi|358485511|ref|NC_006088.3|GGA1	70.72	4108	832	84	10766	14675	2837871	2833937	0	1941	7580	M
SMAC_Scaffolded_contig_61346	gi|358485511|ref|NC_006088.3|GGA1	74.77	1930	344	38	839	2668	2840955	2839069	0	1243	2	S
SMAC_Scaffolded_contig_21970	gi|358485511|ref|NC_006088.3|GGA1	74.7	1652	329	28	1423	3006	2848851	2850481	0	1049	234	M
SMAC_Scaffolded_contig_125600	gi|358485511|ref|NC_006088.3|GGA1	80.2	101	20	0	770	870	2854873	2854973	8e-17	93	613	M
SMAC_Scaffolded_contig_149683	gi|358485511|ref|NC_006088.3|GGA1	82.3	339	49	2	295	633	2862433	2862106	3e-91	342	1	S
SMAC_Scaffolded_contig_174272	gi|358485511|ref|NC_006088.3|GGA1	87.76	49	6	0	581	629	2863888	2863936	1e-07	62	4716	M
SMAC_Scaffolded_contig_157953	gi|358485511|ref|NC_006088.3|GGA1	84.73	334	51	0	216	549	2864757	2864424	4e-101	372	1	S
SMAC_Scaffolded_contig_155168	gi|358485511|ref|NC_006088.3|GGA1	70.36	253	49	6	48	286	2866250	2866010	1e-23	114	37	M
SMAC_Scaffolded_contig_48055	gi|358485511|ref|NC_006088.3|GGA1	81.61	897	146	8	1608	2499	2867897	2868779	0	856	3	S
SMAC_Scaffolded_contig_46831	gi|358485511|ref|NC_006088.3|GGA1	78.39	657	134	5	1202	1857	2871254	2871903	7e-148	529	4	S
SMAC_Scaffolded_contig_133957	gi|358485511|ref|NC_006088.3|GGA1	72.64	614	127	10	257	863	2877338	2876759	2e-91	342	2	S
SMAC_Scaffolded_contig_51643	gi|358485511|ref|NC_006088.3|GGA1	87.8	41	5	0	958	998	2883504	2883544	0.0003	51	334	M
SMAC_Scaffolded_contig_51493	gi|358485511|ref|NC_006088.3|GGA1	76.78	1641	315	16	13908	15511	2884105	2885716	0	1229	14476	M
SMAC_Scaffolded_contig_3603	gi|358485511|ref|NC_006088.3|GGA1	69.7	1132	263	16	800	1883	2888109	2889208	3e-137	495	3	S
SMAC_Scaffolded_contig_134262	gi|358485511|ref|NC_006088.3|GGA1	70.67	150	43	1	34	182	2903292	2903143	1e-09	69	116	M
SMAC_Scaffolded_contig_45640	gi|358485511|ref|NC_006088.3|GGA1	71.43	2482	506	54	5848	8240	2903619	2901252	0	1220	2615	M
SMAC_Scaffolded_contig_53239	gi|358485511|ref|NC_006088.3|GGA1	83.63	397	42	8	93	472	2909343	2909733	3e-111	408	3	S
SMAC_Scaffolded_contig_5168	gi|358485511|ref|NC_006088.3|GGA1	76.25	1575	285	31	11592	13130	2916131	2914610	0	1095	536	M
SMAC_Scaffolded_contig_110597	gi|358485511|ref|NC_006088.3|GGA1	87.97	266	26	4	338	601	2928349	2928610	2e-86	324	1	S
SMAC_Scaffolded_contig_72255	gi|358485511|ref|NC_006088.3|GGA1	71.35	698	109	21	298	945	2929184	2929840	1e-92	345	366	M
SMAC_Scaffolded_contig_30564	gi|358485511|ref|NC_006088.3|GGA1	75.42	1558	259	29	2500	3982	2931839	2930331	0	1065	2949	M
SMAC_Scaffolded_contig_30565	gi|358485511|ref|NC_006088.3|GGA1	65.25	938	245	27	794	1696	2934397	2935288	6e-41	174	7	M
SMAC_Scaffolded_contig_46638	gi|358485511|ref|NC_006088.3|GGA1	72.69	1267	272	20	303	1526	2938252	2939487	0	702	894	M
SMAC_Scaffolded_contig_10526	gi|358485511|ref|NC_006088.3|GGA1	72.23	1415	282	26	417	1751	2950921	2949538	0	764	840	M
SMAC_Scaffolded_contig_44628	gi|358485511|ref|NC_006088.3|GGA1	72.31	968	193	21	901	1815	2954986	2954041	5e-142	511	5	S
SMAC_Scaffolded_contig_44627	gi|358485511|ref|NC_006088.3|GGA1	73.39	1721	346	27	1965	3643	2958457	2960107	0	1018	3	S
SMAC_Scaffolded_contig_97697	gi|358485511|ref|NC_006088.3|GGA1	71.07	197	53	3	793	988	2966006	2965813	1e-15	89	521	M
SMAC_Scaffolded_contig_134030	gi|358485511|ref|NC_006088.3|GGA1	71.02	1732	395	32	2	1655	2976247	2977949	0	812	1	S
SMAC_Scaffolded_contig_15423	gi|358485511|ref|NC_006088.3|GGA1	69.16	3962	930	83	8121	11904	2977949	2974102	0	1525	838	M
SMAC_Scaffolded_contig_105559	gi|358485511|ref|NC_006088.3|GGA1	71.68	505	85	15	214	682	2989167	2988685	3e-64	251	4	M
SMAC_Scaffolded_contig_41530	gi|358485511|ref|NC_006088.3|GGA1	70.36	1110	232	31	4939	6002	2993469	2994527	3e-128	466	26	M
SMAC_Scaffolded_contig_34440	gi|358485511|ref|NC_006088.3|GGA1	78.61	374	75	4	193	562	2996606	2996978	1e-78	300	2	S
SMAC_Scaffolded_contig_26618	gi|358485511|ref|NC_006088.3|GGA1	74.44	3584	657	72	5112	8551	3003861	3000393	0	2242	5	S
SMAC_Scaffolded_contig_103071	gi|358485511|ref|NC_006088.3|GGA1	77.59	290	55	5	68	351	3008450	3008165	2e-54	217	1	S
SMAC_Scaffolded_contig_54357	gi|358485511|ref|NC_006088.3|GGA1	70.33	718	141	17	983	1668	3010537	3009860	9e-86	324	9093	M
SMAC_Scaffolded_contig_26204	gi|358485511|ref|NC_006088.3|GGA1	65.65	1898	482	53	2043	3871	3012983	3014779	7e-108	398	4	S
SMAC_Scaffolded_contig_61457	gi|358485511|ref|NC_006088.3|GGA1	68.3	839	214	19	1147	1966	3016149	3016954	3e-71	275	1	S
SMAC_Scaffolded_contig_56231	gi|358485511|ref|NC_006088.3|GGA1	74.1	417	77	9	431	829	3018236	3017833	4e-65	253	1	S
SMAC_Scaffolded_contig_24898	gi|358485511|ref|NC_006088.3|GGA1	87.59	145	18	0	614	758	3019451	3019595	4e-43	181	30	M
SMAC_Scaffolded_contig_13742	gi|358485511|ref|NC_006088.3|GGA1	77.78	153	25	1	74	226	3021014	3020871	2e-27	127	1	S
SMAC_Scaffolded_contig_82564	gi|358485511|ref|NC_006088.3|GGA1	79.32	237	46	3	980	1214	3022022	3022257	1e-47	196	1	S
SMAC_Scaffolded_contig_71663	gi|358485511|ref|NC_006088.3|GGA1	71.73	757	137	21	1424	2145	3024368	3025082	1e-101	376	2	S
SMAC_Scaffolded_contig_72786	gi|358485511|ref|NC_006088.3|GGA1	78.24	1011	135	19	166	1166	3028106	3027171	0	823	2	S
SMAC_Scaffolded_contig_46746	gi|358485511|ref|NC_006088.3|GGA1	80.73	1967	280	33	7596	9504	3035982	3037907	0	1779	4741	M
SMAC_Scaffolded_contig_49962	gi|358485511|ref|NC_006088.3|GGA1	69.8	1881	329	43	1219	2924	3039871	3038055	0	854	2	S
SMAC_Scaffolded_contig_143915	gi|358485511|ref|NC_006088.3|GGA1	73.54	945	189	24	221	1119	3047233	3048162	2e-146	524	1	S
SMAC_Scaffolded_contig_21053	gi|358485511|ref|NC_006088.3|GGA1	76.38	940	166	20	2812	3734	3049580	3048680	0	655	2	S
SMAC_Scaffolded_contig_35142	gi|358485511|ref|NC_006088.3|GGA1	70.6	1983	413	51	4805	6723	3056362	3058238	0	872	175	M
SMAC_Scaffolded_contig_92847	gi|358485511|ref|NC_006088.3|GGA1	72.08	881	187	21	78	935	3064751	3065595	9e-121	439	1	S
SMAC_Scaffolded_contig_96590	gi|358485511|ref|NC_006088.3|GGA1	78.74	494	82	11	16	498	3069560	3070041	4e-106	389	1	S
SMAC_Scaffolded_contig_10481	gi|358485511|ref|NC_006088.3|GGA1	74.36	1845	332	48	12695	14486	3069562	3067806	0	1106	1751	M
SMAC_Scaffolded_contig_10454	gi|358485511|ref|NC_006088.3|GGA1	67.34	1197	282	24	33	1174	3076335	3077477	5e-105	387	1	S
SMAC_Scaffolded_contig_125829	gi|358485511|ref|NC_006088.3|GGA1	68.96	1846	379	49	534	2300	3080730	3079000	0	700	1	S
SMAC_Scaffolded_contig_125828	gi|358485511|ref|NC_006088.3|GGA1	76.07	397	85	5	155	548	3081585	3081974	9e-72	275	1	S
SMAC_Scaffolded_contig_99049	gi|358485511|ref|NC_006088.3|GGA1	78.4	1153	199	19	7202	8334	3084738	3085860	0	917	2	S
SMAC_Scaffolded_contig_124461	gi|358485511|ref|NC_006088.3|GGA1	91.97	249	18	2	7	254	3085627	3085380	7e-95	352	876	M
SMAC_Scaffolded_contig_152634	gi|358485511|ref|NC_006088.3|GGA1	71.22	139	31	5	97	235	3086746	3086875	3e-06	57	121	M
SMAC_Scaffolded_contig_115947	gi|358485511|ref|NC_006088.3|GGA1	75.98	229	33	3	288	515	3094579	3094372	6e-41	172	1	S
SMAC_Scaffolded_contig_53667	gi|358485511|ref|NC_006088.3|GGA1	83.73	547	62	7	261	785	3095464	3094923	8e-162	578	6	S
SMAC_Scaffolded_contig_101224	gi|358485511|ref|NC_006088.3|GGA1	72.98	1910	355	55	837	2661	3096551	3098384	0	1016	4	M
SMAC_Scaffolded_contig_52562	gi|358485511|ref|NC_006088.3|GGA1	70.27	5734	1103	166	772	6214	3105870	3100448	0	2450	1	S
SMAC_Scaffolded_contig_52644	gi|358485511|ref|NC_006088.3|GGA1	70.97	496	99	14	837	1297	3107830	3108315	1e-55	223	1	S
SMAC_Scaffolded_contig_18108	gi|358485511|ref|NC_006088.3|GGA1	71.4	3493	612	90	1617	4917	3109348	3112645	0	1739	114	M
SMAC_Scaffolded_contig_121044	gi|358485511|ref|NC_006088.3|GGA1	64.48	1008	277	29	362	1318	3117817	3116840	7e-33	147	1342	M
SMAC_Scaffolded_contig_10392	gi|358485511|ref|NC_006088.3|GGA1	74.41	895	156	24	2390	3244	3122010	3121149	7e-151	540	2	S
SMAC_Scaffolded_contig_56397	gi|358485511|ref|NC_006088.3|GGA1	72.54	335	82	7	6	338	3127358	3127032	6e-39	167	1	S
SMAC_Scaffolded_contig_56398	gi|358485511|ref|NC_006088.3|GGA1	72.2	615	132	18	840	1443	3128049	3127463	7e-77	293	1	S
SMAC_Scaffolded_contig_52845	gi|358485511|ref|NC_006088.3|GGA1	66.53	1476	307	41	8579	9949	3131852	3133245	8e-114	419	249	M
SMAC_Scaffolded_contig_39824	gi|358485511|ref|NC_006088.3|GGA1	75.32	1009	152	17	951	1932	3139492	3138554	0	708	28	M
SMAC_Scaffolded_contig_115995	gi|358485511|ref|NC_006088.3|GGA1	75.93	1263	249	26	284	1509	3140463	3141707	0	839	1	S
SMAC_Scaffolded_contig_143692	gi|358485511|ref|NC_006088.3|GGA1	87.8	41	3	2	1225	1265	3146850	3146888	0.05	44	175	M
SMAC_Scaffolded_contig_121437	gi|358485511|ref|NC_006088.3|GGA1	80.71	425	75	5	1	424	3149382	3149800	9e-104	381	1	S
SMAC_Scaffolded_contig_183	gi|358485511|ref|NC_006088.3|GGA1	83.55	693	104	8	13107	13796	3149800	3149115	0	710	28804	M
SMAC_Scaffolded_contig_18570	gi|358485511|ref|NC_006088.3|GGA1	71.25	1506	309	38	1058	2476	3153926	3152458	0	704	4	M
SMAC_Scaffolded_contig_11564	gi|358485511|ref|NC_006088.3|GGA1	70.57	513	102	14	9	485	3164188	3164687	5e-57	226	110	M
SMAC_Scaffolded_contig_78080	gi|358485511|ref|NC_006088.3|GGA1	74.83	1049	197	23	59	1064	3165716	3164692	0	659	3	S
SMAC_Scaffolded_contig_78081	gi|358485511|ref|NC_006088.3|GGA1	66.57	658	152	14	409	1026	3166816	3167445	7e-47	194	9302	M
SMAC_Scaffolded_contig_121357	gi|358485511|ref|NC_006088.3|GGA1	74.06	663	127	19	127	760	3170913	3171559	6e-102	376	1	S
SMAC_Scaffolded_contig_22248	gi|358485511|ref|NC_006088.3|GGA1	72.84	1808	355	34	5231	6958	3175631	3173880	0	1016	22919	M
SMAC_Scaffolded_contig_27595	gi|358485511|ref|NC_006088.3|GGA1	77.67	300	61	4	305	600	3175767	3176064	9e-57	226	8833	M
SMAC_Scaffolded_contig_20413	gi|358485511|ref|NC_006088.3|GGA1	74.63	272	57	5	984	1244	3175792	3176062	2e-39	168	65	M
SMAC_Scaffolded_contig_42795	gi|358485511|ref|NC_006088.3|GGA1	74.36	273	67	1	948	1217	3175792	3176064	7e-41	176	3904	M
SMAC_Scaffolded_contig_121964	gi|358485511|ref|NC_006088.3|GGA1	79.65	226	41	4	1	225	3175856	3176077	8e-45	187	742	M
SMAC_Scaffolded_contig_3480	gi|358485511|ref|NC_006088.3|GGA1	74.46	278	64	2	3610	3880	3176064	3175787	3e-42	179	1570	M
SMAC_Scaffolded_contig_112787	gi|358485511|ref|NC_006088.3|GGA1	71.73	955	187	20	4	913	3180544	3179628	4e-136	489	1	S
SMAC_Scaffolded_contig_69144	gi|358485511|ref|NC_006088.3|GGA1	68.84	1348	278	24	827	2068	3186264	3187575	7e-156	558	20806	M
SMAC_Scaffolded_contig_149456	gi|358485511|ref|NC_006088.3|GGA1	79.13	484	94	7	93	573	3190402	3190881	4e-107	392	1	S
SMAC_Scaffolded_contig_26206	gi|358485511|ref|NC_006088.3|GGA1	77.45	1783	272	33	646	2351	3192963	3194692	0	1371	3	S
SMAC_Scaffolded_contig_19474	gi|358485511|ref|NC_006088.3|GGA1	71.77	294	44	11	7	297	3196917	3196660	1e-31	141	2	S
SMAC_Scaffolded_contig_8270	gi|358485511|ref|NC_006088.3|GGA1	75.09	1164	224	21	149	1281	3201369	3200241	0	756	4	M
SMAC_Scaffolded_contig_8269	gi|358485511|ref|NC_006088.3|GGA1	74.47	2366	402	52	1368	3589	3202371	3204678	0	1492	2	S
SMAC_Scaffolded_contig_19090	gi|358485511|ref|NC_006088.3|GGA1	67.72	2175	488	69	6123	8170	3212860	3210773	3e-180	639	4	S
SMAC_Scaffolded_contig_19091	gi|358485511|ref|NC_006088.3|GGA1	73.21	825	148	16	1614	2398	3220901	3221692	1e-134	486	2	S
SMAC_Scaffolded_contig_65504	gi|358485511|ref|NC_006088.3|GGA1	69.06	695	156	25	690	1377	3223634	3224276	5e-56	224	1	S
SMAC_Scaffolded_contig_64112	gi|358485511|ref|NC_006088.3|GGA1	71.99	1096	225	26	2696	3750	3227314	3226260	2e-153	549	2	S
SMAC_Scaffolded_contig_64113	gi|358485511|ref|NC_006088.3|GGA1	72.89	332	71	6	901	1219	3230819	3231144	1e-43	183	1	S
SMAC_Scaffolded_contig_46621	gi|358485511|ref|NC_006088.3|GGA1	67.36	386	85	13	133	499	3231710	3231347	3e-21	107	485	M
SMAC_Scaffolded_contig_46620	gi|358485511|ref|NC_006088.3|GGA1	75.71	210	30	5	166	357	3233254	3233460	3e-32	145	4	M
SMAC_Scaffolded_contig_54381	gi|358485511|ref|NC_006088.3|GGA1	75.14	1223	215	31	109	1309	3243222	3242067	0	776	3	S
SMAC_Scaffolded_contig_55146	gi|358485511|ref|NC_006088.3|GGA1	72.51	1393	271	40	1596	2929	3244350	3243011	0	706	2	S
SMAC_Scaffolded_contig_15041	gi|358485511|ref|NC_006088.3|GGA1	66.48	910	212	21	6690	7544	3250679	3249808	2e-64	255	2	S
SMAC_Scaffolded_contig_134781	gi|358485511|ref|NC_006088.3|GGA1	67.78	329	92	3	718	1032	3252112	3252440	3e-23	114	1	S
SMAC_Scaffolded_contig_143969	gi|358485511|ref|NC_006088.3|GGA1	73	100	25	1	187	284	3253442	3253343	3e-06	57	25	M
SMAC_Scaffolded_contig_174054	gi|358485511|ref|NC_006088.3|GGA1	68.18	176	41	6	374	540	3256324	3256493	0.0001	51	7	M
SMAC_Scaffolded_contig_123642	gi|358485511|ref|NC_006088.3|GGA1	73.19	470	86	10	67	507	3257166	3257624	1e-70	271	1	S
SMAC_Scaffolded_contig_165325	gi|358485511|ref|NC_006088.3|GGA1	70.75	465	101	11	113	566	3258800	3258360	1e-51	208	805	M
SMAC_Scaffolded_contig_43983	gi|358485511|ref|NC_006088.3|GGA1	73.17	492	94	9	3495	3972	3263187	3263654	3e-74	286	3	S
SMAC_Scaffolded_contig_91753	gi|358485511|ref|NC_006088.3|GGA1	74.88	637	119	10	357	966	3263979	3264601	6e-115	419	934	M
SMAC_Scaffolded_contig_43483	gi|358485511|ref|NC_006088.3|GGA1	71.3	216	34	6	265	473	3265276	3265082	8e-22	109	31	M
SMAC_Scaffolded_contig_91233	gi|358485511|ref|NC_006088.3|GGA1	66.25	1692	413	39	69	1674	3267451	3265832	2e-122	444	1	S
SMAC_Scaffolded_contig_70251	gi|358485511|ref|NC_006088.3|GGA1	78.52	461	69	7	7691	8145	3275768	3276204	1e-102	381	5	S
SMAC_Scaffolded_contig_92634	gi|358485511|ref|NC_006088.3|GGA1	67.58	4358	924	124	4083	8211	3280948	3285045	0	1371	5	S
SMAC_Scaffolded_contig_102236	gi|358485511|ref|NC_006088.3|GGA1	68.69	1482	315	39	1266	2659	3290502	3291922	1e-150	540	634	M
SMAC_Scaffolded_contig_21643	gi|358485511|ref|NC_006088.3|GGA1	71.36	4556	883	128	554	4878	3294632	3298996	0	2136	1	S
SMAC_Scaffolded_contig_31908	gi|358485511|ref|NC_006088.3|GGA1	77.84	713	136	14	3848	4550	3301768	3301068	7e-148	531	4	S
SMAC_Scaffolded_contig_99911	gi|358485511|ref|NC_006088.3|GGA1	68.43	1004	217	31	908	1872	3307789	3306847	1e-88	333	1	S
SMAC_Scaffolded_contig_12671	gi|358485511|ref|NC_006088.3|GGA1	73.78	1125	243	22	160	1247	3310305	3309196	0	646	1	S
SMAC_Scaffolded_contig_160749	gi|358485511|ref|NC_006088.3|GGA1	76.4	267	55	7	249	512	3312474	3312735	2e-41	174	1	S
SMAC_Scaffolded_contig_93231	gi|358485511|ref|NC_006088.3|GGA1	70.93	289	75	4	1	284	3312976	3313260	7e-29	132	1	S
SMAC_Scaffolded_contig_3798	gi|358485511|ref|NC_006088.3|GGA1	69.52	1880	372	53	4531	6312	3316048	3314272	0	749	1274	M
SMAC_Scaffolded_contig_3797	gi|358485511|ref|NC_006088.3|GGA1	71.29	533	137	7	620	1143	3318461	3318986	2e-65	255	2	S
SMAC_Scaffolded_contig_86503	gi|358485511|ref|NC_006088.3|GGA1	76.24	564	119	11	6	555	3319319	3319881	4e-106	389	9374	M
SMAC_Scaffolded_contig_50724	gi|358485511|ref|NC_006088.3|GGA1	74.55	1234	273	15	1374	2576	3320367	3319144	0	780	15807	M
SMAC_Scaffolded_contig_115925	gi|358485511|ref|NC_006088.3|GGA1	73.84	1334	296	15	913	2202	3320494	3319170	0	812	15134	M
SMAC_Scaffolded_contig_68411	gi|358485511|ref|NC_006088.3|GGA1	69.23	1391	330	25	1637	2937	3320538	3319156	7e-155	554	12283	M
SMAC_Scaffolded_contig_58186	gi|358485511|ref|NC_006088.3|GGA1	73.67	490	116	10	295	779	3321885	3322366	5e-70	269	1	S
SMAC_Scaffolded_contig_123810	gi|358485511|ref|NC_006088.3|GGA1	73.21	866	176	16	1	820	3324482	3325337	1e-137	495	2	M
SMAC_Scaffolded_contig_7909	gi|358485511|ref|NC_006088.3|GGA1	68.3	1224	271	33	6694	7865	3327882	3329040	9e-113	416	23419	M
SMAC_Scaffolded_contig_48106	gi|358485511|ref|NC_006088.3|GGA1	67.5	240	49	6	633	844	3335397	3335635	8e-13	80	93	M
SMAC_Scaffolded_contig_9136	gi|358485511|ref|NC_006088.3|GGA1	68.09	445	108	16	7921	8339	3339433	3339869	2e-24	122	1	S
SMAC_Scaffolded_contig_66309	gi|358485511|ref|NC_006088.3|GGA1	78.2	399	70	15	395	787	3343095	3342708	5e-71	275	1	S
SMAC_Scaffolded_contig_57803	gi|358485511|ref|NC_006088.3|GGA1	78.1	306	60	5	2592	2894	3345146	3344845	2e-58	233	502	M
SMAC_Scaffolded_contig_75249	gi|358485511|ref|NC_006088.3|GGA1	70.27	666	145	17	77	701	3349531	3348878	3e-73	280	1	S
SMAC_Scaffolded_contig_61830	gi|358485511|ref|NC_006088.3|GGA1	69.75	1190	269	25	663	1792	3351281	3352439	1e-136	493	2	S
SMAC_Scaffolded_contig_17549	gi|358485511|ref|NC_006088.3|GGA1	69.23	221	47	3	726	932	3355237	3355024	2e-18	98	4984	M
SMAC_Scaffolded_contig_119430	gi|358485511|ref|NC_006088.3|GGA1	67.76	732	204	16	251	967	3358678	3357964	6e-53	214	1	S
SMAC_Scaffolded_contig_4467	gi|358485511|ref|NC_006088.3|GGA1	69.99	793	177	14	2	771	3359506	3358752	6e-94	349	1	S
SMAC_Scaffolded_contig_38638	gi|358485511|ref|NC_006088.3|GGA1	69.22	692	162	15	689	1352	3360326	3359658	9e-69	266	2	S
SMAC_Scaffolded_contig_4466	gi|358485511|ref|NC_006088.3|GGA1	63.89	745	178	21	757	1434	3360824	3361544	5e-24	118	1065	M
SMAC_Scaffolded_contig_101754	gi|358485511|ref|NC_006088.3|GGA1	67.2	750	179	18	8	707	3363292	3362560	1e-55	223	1	S
SMAC_Scaffolded_contig_140588	gi|358485511|ref|NC_006088.3|GGA1	80.95	84	16	0	290	373	3363486	3363569	5e-13	80	31	M
SMAC_Scaffolded_contig_101753	gi|358485511|ref|NC_006088.3|GGA1	78.89	398	71	9	2955	3346	3368369	3368759	6e-82	311	3	S
SMAC_Scaffolded_contig_61710	gi|358485511|ref|NC_006088.3|GGA1	72.78	529	86	14	39	524	3369120	3369633	7e-78	295	1	S
SMAC_Scaffolded_contig_137309	gi|358485511|ref|NC_006088.3|GGA1	83.6	439	72	0	219	657	3370128	3369690	7e-130	468	1	S
SMAC_Scaffolded_contig_48332	gi|358485511|ref|NC_006088.3|GGA1	70.69	754	173	6	6	737	3370622	3371349	7e-103	379	1	S
SMAC_Scaffolded_contig_101925	gi|358485511|ref|NC_006088.3|GGA1	77.54	236	48	2	305	535	3372011	3372246	5e-44	183	1	S
SMAC_Scaffolded_contig_13581	gi|358485511|ref|NC_006088.3|GGA1	75.44	794	140	11	371	1129	3377598	3376825	1e-154	553	5	S
SMAC_Scaffolded_contig_60444	gi|358485511|ref|NC_006088.3|GGA1	72.5	1829	326	43	5635	7340	3392713	3390939	0	996	1311	M
SMAC_Scaffolded_contig_40969	gi|358485511|ref|NC_006088.3|GGA1	79.74	1076	179	14	369	1443	3393790	3392753	0	930	2	S
SMAC_Scaffolded_contig_38266	gi|358485511|ref|NC_006088.3|GGA1	69.32	1548	300	36	1	1478	3400695	3402137	0	646	1	S
SMAC_Scaffolded_contig_89570	gi|358485511|ref|NC_006088.3|GGA1	66.04	2647	566	68	10248	12760	3402137	3399690	0	729	10	M
SMAC_Scaffolded_contig_121652	gi|358485511|ref|NC_006088.3|GGA1	77.03	148	33	1	415	561	3406916	3406769	2e-22	111	1	S
SMAC_Scaffolded_contig_145617	gi|358485511|ref|NC_006088.3|GGA1	77.24	145	28	2	2004	2147	3407818	3407678	2e-21	109	1	S
SMAC_Scaffolded_contig_168628	gi|358485511|ref|NC_006088.3|GGA1	76.76	327	67	5	1	326	3407899	3408217	4e-59	233	1	S
SMAC_Scaffolded_contig_66669	gi|358485511|ref|NC_006088.3|GGA1	72.61	460	93	8	145	598	3410367	3410799	1e-65	255	1	S
SMAC_Scaffolded_contig_76095	gi|358485511|ref|NC_006088.3|GGA1	68.46	964	210	25	7631	8537	3416496	3417422	5e-90	340	10541	M
SMAC_Scaffolded_contig_138277	gi|358485511|ref|NC_006088.3|GGA1	71.2	1021	182	25	151	1141	3417476	3418414	3e-140	504	15	M
SMAC_Scaffolded_contig_18848	gi|358485511|ref|NC_006088.3|GGA1	68.64	1693	296	59	11570	13116	3421281	3419678	8e-170	605	6379	M
SMAC_Scaffolded_contig_85023	gi|358485511|ref|NC_006088.3|GGA1	80.43	1175	179	20	1058	2195	3423676	3424836	0	1038	4	S
SMAC_Scaffolded_contig_18849	gi|358485511|ref|NC_006088.3|GGA1	68.68	1140	222	33	536	1565	3433659	3434773	1e-114	419	1	S
SMAC_Scaffolded_contig_5777	gi|358485511|ref|NC_006088.3|GGA1	68.88	649	165	17	2662	3297	3440484	3441108	1e-53	217	1250	M
SMAC_Scaffolded_contig_21683	gi|358485511|ref|NC_006088.3|GGA1	70.3	697	141	23	4412	5074	3447197	3447861	2e-72	280	5	M
SMAC_Scaffolded_contig_33895	gi|358485511|ref|NC_006088.3|GGA1	67.85	678	147	15	833	1472	3449127	3449771	7e-60	237	2	S
SMAC_Scaffolded_contig_174794	gi|358485511|ref|NC_006088.3|GGA1	82.27	203	25	2	194	386	3454162	3454363	1e-50	205	1285	M
SMAC_Scaffolded_contig_24687	gi|358485511|ref|NC_006088.3|GGA1	70.77	1786	342	54	3094	4770	3469326	3467612	0	787	2511	M
SMAC_Scaffolded_contig_64809	gi|358485511|ref|NC_006088.3|GGA1	73.81	714	126	23	3813	4492	3475325	3474639	4e-107	396	17	M
SMAC_Scaffolded_contig_99413	gi|358485511|ref|NC_006088.3|GGA1	73.6	909	139	15	93	936	3482717	3481845	2e-163	581	1	S
SMAC_Scaffolded_contig_28146	gi|358485511|ref|NC_006088.3|GGA1	73.76	949	204	17	208	1144	3486487	3485572	1e-154	553	5	M
SMAC_Scaffolded_contig_135399	gi|358485511|ref|NC_006088.3|GGA1	72.37	1028	200	25	223	1228	3493523	3494488	5e-150	536	17	M
SMAC_Scaffolded_contig_188411	gi|358485511|ref|NC_006088.3|GGA1	71.67	300	65	4	12	292	3495632	3495930	1e-36	158	1	S
SMAC_Scaffolded_contig_107288	gi|358485511|ref|NC_006088.3|GGA1	70.54	791	173	13	1997	2756	3500538	3501299	3e-100	372	6	M
SMAC_Scaffolded_contig_107192	gi|358485511|ref|NC_006088.3|GGA1	68.4	940	191	24	1980	2877	3503751	3502876	9e-92	343	1	S
SMAC_Scaffolded_contig_79534	gi|358485511|ref|NC_006088.3|GGA1	87.69	65	7	1	571	634	3504069	3504133	3e-12	78	4258	M
SMAC_Scaffolded_contig_69839	gi|358485511|ref|NC_006088.3|GGA1	71.93	791	175	13	195	960	3507018	3506250	7e-112	410	12920	M
SMAC_Scaffolded_contig_69840	gi|358485511|ref|NC_006088.3|GGA1	80.69	637	94	9	2584	3204	3509450	3510073	8e-163	580	4	M
SMAC_Scaffolded_contig_131829	gi|358485511|ref|NC_006088.3|GGA1	71.81	603	125	12	975	1541	3512631	3512038	8e-81	307	4	S
SMAC_Scaffolded_contig_100854	gi|358485511|ref|NC_006088.3|GGA1	72.46	414	92	8	1197	1600	3515310	3515711	5e-54	217	841	M
SMAC_Scaffolded_contig_159468	gi|358485511|ref|NC_006088.3|GGA1	90.91	44	4	0	14	57	3517979	3517936	1e-07	62	882	M
SMAC_Scaffolded_contig_23060	gi|358485511|ref|NC_006088.3|GGA1	75.43	1396	248	35	4741	6096	3530773	3529433	0	899	18736	M
SMAC_Scaffolded_contig_63891	gi|358485511|ref|NC_006088.3|GGA1	83.19	476	58	6	1019	1485	3536480	3536942	6e-136	491	2590	M
SMAC_Scaffolded_contig_20075	gi|358485511|ref|NC_006088.3|GGA1	71.55	710	160	9	5628	6302	3539469	3540171	2e-98	367	3082	M
SMAC_Scaffolded_contig_56303	gi|358485511|ref|NC_006088.3|GGA1	71.78	1297	324	17	3488	4753	3539701	3540986	0	650	15338	M
SMAC_Scaffolded_contig_69223	gi|358485511|ref|NC_006088.3|GGA1	74.04	1148	254	14	1601	2709	3539753	3540895	0	704	24568	M
SMAC_Scaffolded_contig_82786	gi|358485511|ref|NC_006088.3|GGA1	73.74	872	190	12	612	1467	3539955	3540803	8e-146	522	15533	M
SMAC_Scaffolded_contig_61455	gi|358485511|ref|NC_006088.3|GGA1	73.72	685	146	10	2462	3115	3539982	3540663	3e-111	410	15098	M
SMAC_Scaffolded_contig_62827	gi|358485511|ref|NC_006088.3|GGA1	74.73	182	40	4	13	193	3540454	3540278	1e-25	123	84	M
SMAC_Scaffolded_contig_143226	gi|358485511|ref|NC_006088.3|GGA1	73.81	565	131	4	103	650	3540605	3540041	4e-93	349	7643	M
SMAC_Scaffolded_contig_152412	gi|358485511|ref|NC_006088.3|GGA1	70.09	856	198	9	2	807	3540875	3540028	1e-109	401	9307	M
SMAC_Scaffolded_contig_152020	gi|358485511|ref|NC_006088.3|GGA1	69.03	155	39	2	4	149	3544688	3544842	2e-07	62	41	M
SMAC_Scaffolded_contig_160260	gi|358485511|ref|NC_006088.3|GGA1	68.74	675	135	23	9	643	3547074	3546436	9e-59	232	1	S
SMAC_Scaffolded_contig_41638	gi|358485511|ref|NC_006088.3|GGA1	69.43	880	186	24	48	880	3547187	3546344	1e-91	342	1	S
SMAC_Scaffolded_contig_41637	gi|358485511|ref|NC_006088.3|GGA1	75.9	913	168	16	178	1060	3547498	3548388	4e-178	630	3	S
SMAC_Scaffolded_contig_144847	gi|358485511|ref|NC_006088.3|GGA1	76.6	970	174	17	1531	2466	3551055	3552005	0	697	1	S
SMAC_Scaffolded_contig_119931	gi|358485511|ref|NC_006088.3|GGA1	73.59	1401	269	24	7131	8460	3554738	3553368	0	841	4551	M
SMAC_Scaffolded_contig_135468	gi|358485511|ref|NC_006088.3|GGA1	74.9	761	145	11	38	764	3560608	3561356	1e-140	504	1	S
SMAC_Scaffolded_contig_11249	gi|358485511|ref|NC_006088.3|GGA1	75.9	473	77	8	2018	2462	3562686	3562223	2e-89	336	5	M
SMAC_Scaffolded_contig_11250	gi|358485511|ref|NC_006088.3|GGA1	72.97	725	142	10	1559	2249	3565705	3566409	2e-117	428	3	M
SMAC_Scaffolded_contig_97231	gi|358485511|ref|NC_006088.3|GGA1	85.14	350	50	1	2	351	3568329	3567982	6e-107	394	3	M
SMAC_Scaffolded_contig_8021	gi|358485511|ref|NC_006088.3|GGA1	69.76	1657	360	25	5056	6645	3572764	3574346	0	744	5	S
SMAC_Scaffolded_contig_55086	gi|358485511|ref|NC_006088.3|GGA1	70.8	2414	421	60	1537	3787	3579192	3576900	0	1160	3	M
SMAC_Scaffolded_contig_122923	gi|358485511|ref|NC_006088.3|GGA1	73.55	692	136	13	651	1310	3580995	3581671	4e-111	407	9	M
SMAC_Scaffolded_contig_68635	gi|358485511|ref|NC_006088.3|GGA1	88.89	63	6	1	1796	1857	3582790	3582728	4e-12	78	6121	M
SMAC_Scaffolded_contig_55085	gi|358485511|ref|NC_006088.3|GGA1	75	1356	270	29	1635	2943	3583659	3584992	0	848	1774	M
SMAC_Scaffolded_contig_162306	gi|358485511|ref|NC_006088.3|GGA1	86.84	38	5	0	625	662	3585029	3584992	0.009	46	69	M
SMAC_Scaffolded_contig_42818	gi|358485511|ref|NC_006088.3|GGA1	78.04	1685	298	24	5339	6982	3595614	3593961	0	1328	7	S
SMAC_Scaffolded_contig_50175	gi|358485511|ref|NC_006088.3|GGA1	73.98	369	70	12	474	818	3597504	3597870	6e-50	203	3496	M
SMAC_Scaffolded_contig_123123	gi|358485511|ref|NC_006088.3|GGA1	65.97	288	73	4	1	286	3598399	3598135	1e-13	82	39	M
SMAC_Scaffolded_contig_127677	gi|358485511|ref|NC_006088.3|GGA1	68.51	308	81	4	408	700	3598749	3599055	2e-23	114	1	S
SMAC_Scaffolded_contig_101571	gi|358485511|ref|NC_006088.3|GGA1	67.12	371	72	15	190	533	3601546	3601893	5e-18	96	59	M
SMAC_Scaffolded_contig_179510	gi|358485511|ref|NC_006088.3|GGA1	65.85	615	122	19	76	635	3602765	3602184	5e-36	156	1	S
SMAC_Scaffolded_contig_33542	gi|358485511|ref|NC_006088.3|GGA1	68.18	1788	383	48	947	2630	3603820	3602115	4e-172	610	3	S
SMAC_Scaffolded_contig_33543	gi|358485511|ref|NC_006088.3|GGA1	69.66	857	182	25	3396	4196	3609338	3610172	1e-87	331	14767	M
SMAC_Scaffolded_contig_120196	gi|358485511|ref|NC_006088.3|GGA1	73.83	321	53	7	11	302	3613360	3613042	4e-48	197	13	M
SMAC_Scaffolded_contig_121714	gi|358485511|ref|NC_006088.3|GGA1	73.81	527	98	14	155	658	3613931	3613422	6e-80	302	1	S
SMAC_Scaffolded_contig_120195	gi|358485511|ref|NC_006088.3|GGA1	74.46	1104	178	23	1947	2972	3616340	3617417	0	710	1	S
SMAC_Scaffolded_contig_158127	gi|358485511|ref|NC_006088.3|GGA1	67.95	546	105	23	220	720	3619151	3618631	9e-36	156	1	S
SMAC_Scaffolded_contig_133351	gi|358485511|ref|NC_006088.3|GGA1	75.23	436	88	6	317	748	3621990	3621571	3e-76	291	1	S
SMAC_Scaffolded_contig_127476	gi|358485511|ref|NC_006088.3|GGA1	73.5	483	91	12	1344	1812	3623584	3624043	8e-71	273	3	S
SMAC_Scaffolded_contig_30846	gi|358485511|ref|NC_006088.3|GGA1	73.73	1001	192	19	1559	2513	3630055	3629080	5e-168	598	5	S
SMAC_Scaffolded_contig_182766	gi|358485511|ref|NC_006088.3|GGA1	74.95	515	115	6	1	505	3631575	3632085	3e-89	333	1	S
SMAC_Scaffolded_contig_104158	gi|358485511|ref|NC_006088.3|GGA1	81.52	460	61	8	12	448	3631815	3631357	3e-119	432	1	S
SMAC_Scaffolded_contig_104159	gi|358485511|ref|NC_006088.3|GGA1	74.64	627	125	13	1950	2567	3633216	3633817	9e-105	387	220	M
SMAC_Scaffolded_contig_97439	gi|358485511|ref|NC_006088.3|GGA1	72.69	227	54	3	561	780	3634082	3634307	4e-26	123	1	S
SMAC_Scaffolded_contig_65472	gi|358485511|ref|NC_006088.3|GGA1	72.63	486	102	9	281	754	3637090	3636624	6e-68	264	2	S
SMAC_Scaffolded_contig_36724	gi|358485511|ref|NC_006088.3|GGA1	70.86	1630	371	34	6079	7666	3640332	3638765	0	738	719	M
SMAC_Scaffolded_contig_34074	gi|358485511|ref|NC_006088.3|GGA1	75	180	32	3	85	256	3649144	3649318	3e-25	120	1	S
SMAC_Scaffolded_contig_78676	gi|358485511|ref|NC_006088.3|GGA1	78.66	253	46	6	218	467	3655092	3654845	2e-47	194	1	S
SMAC_Scaffolded_contig_16116	gi|358485511|ref|NC_006088.3|GGA1	72.09	799	189	11	407	1183	3656009	3655223	2e-114	417	55	M
SMAC_Scaffolded_contig_16117	gi|358485511|ref|NC_006088.3|GGA1	74.48	576	126	12	641	1203	3657124	3657691	2e-91	342	3	M
SMAC_Scaffolded_contig_109953	gi|358485511|ref|NC_006088.3|GGA1	71	2490	512	57	732	3132	3660972	3663340	0	1168	2	S
SMAC_Scaffolded_contig_171673	gi|358485511|ref|NC_006088.3|GGA1	73.7	479	96	6	1	467	3662880	3663340	4e-78	297	1	S
SMAC_Scaffolded_contig_85947	gi|358485511|ref|NC_006088.3|GGA1	71.61	1705	358	41	376	2020	3665716	3664078	0	821	1	S
SMAC_Scaffolded_contig_85946	gi|358485511|ref|NC_006088.3|GGA1	71.95	1622	326	29	170	1701	3666509	3668091	0	859	1	S
SMAC_Scaffolded_contig_119360	gi|358485511|ref|NC_006088.3|GGA1	77.2	649	127	8	2176	2815	3670078	3670714	1e-134	486	2	S
SMAC_Scaffolded_contig_153242	gi|358485511|ref|NC_006088.3|GGA1	69.57	299	71	7	2	291	3670427	3670714	9e-24	116	1	S
SMAC_Scaffolded_contig_163843	gi|358485511|ref|NC_006088.3|GGA1	75.73	581	107	16	769	1335	3672497	3671937	3e-100	370	2	S
SMAC_Scaffolded_contig_48926	gi|358485511|ref|NC_006088.3|GGA1	74.16	1424	286	26	2258	3626	3675752	3677148	0	866	2653	M
SMAC_Scaffolded_contig_135443	gi|358485511|ref|NC_006088.3|GGA1	70.44	636	132	16	2230	2834	3681189	3680579	4e-72	279	3	S
SMAC_Scaffolded_contig_27498	gi|358485511|ref|NC_006088.3|GGA1	71.34	1106	255	17	1536	2603	3684429	3683348	1e-152	545	3	S
SMAC_Scaffolded_contig_117456	gi|358485511|ref|NC_006088.3|GGA1	70.87	2763	569	48	3665	6370	3690628	3693211	0	1350	7	M
SMAC_Scaffolded_contig_188910	gi|358485511|ref|NC_006088.3|GGA1	87.36	435	48	2	1	428	3692640	3692206	4e-150	535	1	S
SMAC_Scaffolded_contig_172863	gi|358485511|ref|NC_006088.3|GGA1	65.76	625	154	19	1	607	3694472	3693890	2e-28	131	19	M
SMAC_Scaffolded_contig_90470	gi|358485511|ref|NC_006088.3|GGA1	71.56	1375	242	26	2726	4026	3699281	3700580	0	735	8	S
SMAC_Scaffolded_contig_189063	gi|358485511|ref|NC_006088.3|GGA1	73.26	258	59	3	60	317	3700580	3700333	2e-34	150	1	S
SMAC_Scaffolded_contig_103201	gi|358485511|ref|NC_006088.3|GGA1	71.2	1368	280	23	6642	7923	3704225	3702886	0	690	6	S
SMAC_Scaffolded_contig_68147	gi|358485511|ref|NC_006088.3|GGA1	77.95	331	50	5	41	356	3709534	3709212	2e-68	266	5525	M
SMAC_Scaffolded_contig_132640	gi|358485511|ref|NC_006088.3|GGA1	73.39	109	26	1	250	355	3712315	3712207	5e-08	64	107	M
SMAC_Scaffolded_contig_58377	gi|358485511|ref|NC_006088.3|GGA1	78.8	552	110	6	364	910	3714274	3713725	3e-123	448	18	M
SMAC_Scaffolded_contig_100116	gi|358485511|ref|NC_006088.3|GGA1	73.19	925	203	18	552	1447	3718532	3717624	1e-141	509	1	S
SMAC_Scaffolded_contig_101396	gi|358485511|ref|NC_006088.3|GGA1	73.32	1158	222	24	2560	3652	3722840	3723975	0	666	26	M
SMAC_Scaffolded_contig_151516	gi|358485511|ref|NC_006088.3|GGA1	76.04	1223	219	30	1	1180	3726128	3724937	0	816	1	S
SMAC_Scaffolded_contig_181167	gi|358485511|ref|NC_006088.3|GGA1	68.45	431	95	10	3	417	3730452	3730857	8e-36	156	1	S
SMAC_Scaffolded_contig_143588	gi|358485511|ref|NC_006088.3|GGA1	77.81	1298	234	24	2071	3329	3730458	3729176	0	984	3	S
SMAC_Scaffolded_contig_184938	gi|358485511|ref|NC_006088.3|GGA1	76.92	65	15	0	184	248	3731526	3731590	0.0005	50	31	M
SMAC_Scaffolded_contig_143589	gi|358485511|ref|NC_006088.3|GGA1	71.61	560	131	7	489	1041	3734306	3734844	3e-75	288	1	S
SMAC_Scaffolded_contig_63751	gi|358485511|ref|NC_006088.3|GGA1	77.4	668	125	8	2155	2813	3738602	3739252	4e-142	511	3	S
SMAC_Scaffolded_contig_86307	gi|358485511|ref|NC_006088.3|GGA1	85.46	681	87	6	50	718	3740418	3741098	0	765	1	S
SMAC_Scaffolded_contig_91866	gi|358485511|ref|NC_006088.3|GGA1	69.21	484	94	8	1786	2255	3744656	3745098	2e-53	215	2	S
SMAC_Scaffolded_contig_80716	gi|358485511|ref|NC_006088.3|GGA1	78.3	682	122	9	177	846	3745743	3745076	4e-153	545	3	M
SMAC_Scaffolded_contig_145840	gi|358485511|ref|NC_006088.3|GGA1	68.99	1219	256	22	1	1121	3745847	3747041	7e-141	506	1	S
SMAC_Scaffolded_contig_15773	gi|358485511|ref|NC_006088.3|GGA1	72.88	365	65	6	1273	1604	3747041	3746678	2e-53	215	1	S
SMAC_Scaffolded_contig_181542	gi|358485511|ref|NC_006088.3|GGA1	71.21	646	134	12	134	765	3749154	3749761	4e-85	320	1	S
SMAC_Scaffolded_contig_46480	gi|358485511|ref|NC_006088.3|GGA1	72.63	1838	355	39	3198	4962	3751694	3753456	0	1005	464	M
SMAC_Scaffolded_contig_21511	gi|358485511|ref|NC_006088.3|GGA1	79.65	1150	172	12	3	1136	3757969	3756866	0	1021	10	M
SMAC_Scaffolded_contig_155780	gi|358485511|ref|NC_006088.3|GGA1	71.32	896	180	19	22	878	3759778	3758921	1e-121	441	1	S
SMAC_Scaffolded_contig_21512	gi|358485511|ref|NC_006088.3|GGA1	75.99	1762	326	25	1309	3013	3762198	3763919	0	1245	1461	M
SMAC_Scaffolded_contig_127204	gi|358485511|ref|NC_006088.3|GGA1	73.85	1637	292	27	2957	4530	3766337	3764774	0	1023	5	S
SMAC_Scaffolded_contig_158687	gi|358485511|ref|NC_006088.3|GGA1	71.07	1023	226	26	429	1406	3772426	3771429	3e-126	457	1	S
SMAC_Scaffolded_contig_62296	gi|358485511|ref|NC_006088.3|GGA1	68.64	641	159	12	5278	5892	3781376	3782000	2e-58	233	2	S
SMAC_Scaffolded_contig_101657	gi|358485511|ref|NC_006088.3|GGA1	79.71	631	117	5	28	651	3786251	3785625	2e-153	549	1596	M
SMAC_Scaffolded_contig_16286	gi|358485511|ref|NC_006088.3|GGA1	69.77	559	101	13	451	956	3788184	3788727	5e-64	250	1	S
SMAC_Scaffolded_contig_91321	gi|358485511|ref|NC_006088.3|GGA1	68.45	897	203	24	475	1343	3788975	3789819	1e-80	306	6870	M
SMAC_Scaffolded_contig_12147	gi|358485511|ref|NC_006088.3|GGA1	73.73	3220	590	64	7981	11093	3792836	3795906	0	1936	47	M
SMAC_Scaffolded_contig_123496	gi|358485511|ref|NC_006088.3|GGA1	93.55	31	2	0	1103	1133	3800439	3800469	0.006	48	35	M
SMAC_Scaffolded_contig_84433	gi|358485511|ref|NC_006088.3|GGA1	70.93	719	165	15	1	709	3809011	3809695	2e-87	327	1	S
SMAC_Scaffolded_contig_96432	gi|358485511|ref|NC_006088.3|GGA1	71.95	599	123	12	61	652	3810314	3809754	8e-82	309	2	S
SMAC_Scaffolded_contig_79454	gi|358485511|ref|NC_006088.3|GGA1	81.2	782	114	8	2109	2879	3812901	3812142	0	742	3	S
SMAC_Scaffolded_contig_137017	gi|358485511|ref|NC_006088.3|GGA1	74.65	1361	276	25	2050	3376	3816594	3815269	0	848	1740	M
SMAC_Scaffolded_contig_188638	gi|358485511|ref|NC_006088.3|GGA1	72.66	545	105	13	3	531	3821428	3820912	3e-77	293	1	S
SMAC_Scaffolded_contig_115779	gi|358485511|ref|NC_006088.3|GGA1	72.89	2250	449	41	2172	4337	3826555	3824383	0	1269	1775	M
SMAC_Scaffolded_contig_41435	gi|358485511|ref|NC_006088.3|GGA1	74.75	99	22	1	135	233	3832667	3832572	2e-08	64	18	M
SMAC_Scaffolded_contig_41434	gi|358485511|ref|NC_006088.3|GGA1	67.8	236	66	4	6	238	3832800	3832572	1e-11	75	22	M
SMAC_Scaffolded_contig_37921	gi|358485511|ref|NC_006088.3|GGA1	74.51	2036	336	45	3685	5605	3833783	3835750	0	1294	7	S
SMAC_Scaffolded_contig_133014	gi|358485511|ref|NC_006088.3|GGA1	73.96	1609	338	20	1	1552	3841256	3839672	0	996	1	S
SMAC_Scaffolded_contig_68112	gi|358485511|ref|NC_006088.3|GGA1	73.44	994	170	28	5613	6537	3845200	3846168	4e-157	562	99	M
SMAC_Scaffolded_contig_129238	gi|358485511|ref|NC_006088.3|GGA1	75.87	431	81	12	1	417	3845747	3846168	9e-72	275	22288	M
SMAC_Scaffolded_contig_109317	gi|358485511|ref|NC_006088.3|GGA1	65.44	463	98	16	53	482	3846536	3846969	1e-18	98	14	M
SMAC_Scaffolded_contig_63118	gi|358485511|ref|NC_006088.3|GGA1	74.96	2800	477	47	1975	4694	3848434	3851089	0	1880	192	M
SMAC_Scaffolded_contig_63119	gi|358485511|ref|NC_006088.3|GGA1	75.95	553	98	12	437	975	3855451	3855982	6e-102	376	2	S
SMAC_Scaffolded_contig_100187	gi|358485511|ref|NC_006088.3|GGA1	84.85	132	18	2	474	604	3860299	3860169	2e-31	141	1	S
SMAC_Scaffolded_contig_140354	gi|358485511|ref|NC_006088.3|GGA1	73.51	502	76	7	1058	1556	3863991	3863544	2e-86	325	996	M
SMAC_Scaffolded_contig_140355	gi|358485511|ref|NC_006088.3|GGA1	69.83	1359	260	28	129	1450	3864882	3866127	5e-174	616	1	S
SMAC_Scaffolded_contig_170607	gi|358485511|ref|NC_006088.3|GGA1	79.51	771	125	9	1	762	3866491	3867237	0	668	1	S
SMAC_Scaffolded_contig_114102	gi|358485511|ref|NC_006088.3|GGA1	74	1381	230	24	657	1935	3868630	3869983	0	881	1193	M
SMAC_Scaffolded_contig_62973	gi|358485511|ref|NC_006088.3|GGA1	76.42	1675	236	27	7890	9485	3876549	3878143	0	1261	9	M
SMAC_Scaffolded_contig_130317	gi|358485511|ref|NC_006088.3|GGA1	72.77	3019	539	71	109	3026	3881121	3883957	0	1674	2	S
SMAC_Scaffolded_contig_157647	gi|358485511|ref|NC_006088.3|GGA1	91.18	34	3	0	592	625	3885335	3885302	0.002	48	22	M
SMAC_Scaffolded_contig_171648	gi|358485511|ref|NC_006088.3|GGA1	67.77	211	34	5	10	213	3886094	3885911	9e-14	82	11	M
SMAC_Scaffolded_contig_133188	gi|358485511|ref|NC_006088.3|GGA1	70.53	1371	268	36	141	1439	3887217	3885911	7e-173	612	3	M
SMAC_Scaffolded_contig_108413	gi|358485511|ref|NC_006088.3|GGA1	78.09	534	95	6	1261	1772	3889037	3889570	6e-117	428	810	M
SMAC_Scaffolded_contig_126745	gi|358485511|ref|NC_006088.3|GGA1	79.75	632	96	7	1276	1900	3896525	3897131	2e-156	560	35	M
SMAC_Scaffolded_contig_107812	gi|358485511|ref|NC_006088.3|GGA1	67.96	284	64	9	425	685	3902197	3901918	9e-15	86	38	M
SMAC_Scaffolded_contig_94186	gi|358485511|ref|NC_006088.3|GGA1	67.84	482	114	9	55	513	3902205	3901742	6e-39	167	2	S
SMAC_Scaffolded_contig_85027	gi|358485511|ref|NC_006088.3|GGA1	73.88	739	108	9	215	923	3902490	3903173	4e-139	500	2	S
SMAC_Scaffolded_contig_108206	gi|358485511|ref|NC_006088.3|GGA1	78.83	1398	224	20	7701	9044	3908883	3907504	0	1162	9	S
SMAC_Scaffolded_contig_102340	gi|358485511|ref|NC_006088.3|GGA1	68.49	1625	335	38	181	1692	3919170	3917610	3e-172	610	1	S
SMAC_Scaffolded_contig_155942	gi|358485511|ref|NC_006088.3|GGA1	70.2	406	88	9	133	510	3919987	3920387	5e-42	176	64	M
SMAC_Scaffolded_contig_26001	gi|358485511|ref|NC_006088.3|GGA1	70.2	406	88	9	150	527	3919987	3920387	5e-42	176	4	M
SMAC_Scaffolded_contig_60265	gi|358485511|ref|NC_006088.3|GGA1	73.24	1446	291	30	2167	3559	3923070	3921668	0	814	606	M
SMAC_Scaffolded_contig_121284	gi|358485511|ref|NC_006088.3|GGA1	69.03	226	53	6	41	249	3924988	3925213	3e-13	80	16	M
SMAC_Scaffolded_contig_20930	gi|358485511|ref|NC_006088.3|GGA1	71.41	752	141	15	3044	3742	3927161	3926431	1e-104	387	12	M
SMAC_Scaffolded_contig_119196	gi|358485511|ref|NC_006088.3|GGA1	69.38	1734	316	55	1151	2828	3931197	3932771	0	679	2	S
SMAC_Scaffolded_contig_47259	gi|358485511|ref|NC_006088.3|GGA1	93.55	31	1	1	494	523	3967095	3967125	0.02	44	291	M
SMAC_Scaffolded_contig_67295	gi|358485511|ref|NC_006088.3|GGA1	65.92	1303	268	33	2184	3420	3967291	3968483	7e-96	358	5	M
SMAC_Scaffolded_contig_153029	gi|358485511|ref|NC_006088.3|GGA1	82.48	468	75	3	124	584	3970729	3971196	1e-129	468	1	S
SMAC_Scaffolded_contig_192048	gi|358485511|ref|NC_006088.3|GGA1	90.91	33	3	0	215	247	3973658	3973690	0.008	46	48	M
SMAC_Scaffolded_contig_5509	gi|358485511|ref|NC_006088.3|GGA1	76.3	346	71	7	3	346	3973680	3973344	5e-59	233	2	S
SMAC_Scaffolded_contig_5510	gi|358485511|ref|NC_006088.3|GGA1	77.86	280	55	5	631	905	3974667	3974944	4e-52	210	1	S
SMAC_Scaffolded_contig_5511	gi|358485511|ref|NC_006088.3|GGA1	77.51	289	58	5	842	1125	3974667	3974953	1e-52	212	2	S
SMAC_Scaffolded_contig_114466	gi|358485511|ref|NC_006088.3|GGA1	84.5	271	41	1	475	744	3975200	3974930	3e-78	297	1	S
SMAC_Scaffolded_contig_180371	gi|358485511|ref|NC_006088.3|GGA1	71.38	290	77	4	518	805	3976740	3977025	7e-30	136	1	S
SMAC_Scaffolded_contig_3850	gi|358485511|ref|NC_006088.3|GGA1	65.9	962	248	26	5539	6483	3992315	3991417	1e-51	212	135	M
SMAC_Scaffolded_contig_73489	gi|358485511|ref|NC_006088.3|GGA1	68.05	313	80	6	191	483	4007700	4007388	1e-20	105	36	M
SMAC_Scaffolded_contig_166514	gi|358485511|ref|NC_006088.3|GGA1	80.11	568	90	11	5	557	4008613	4008054	2e-135	486	1	S
SMAC_Scaffolded_contig_33213	gi|358485511|ref|NC_006088.3|GGA1	71.47	333	89	3	155	483	4008787	4009117	9e-39	165	1	S
SMAC_Scaffolded_contig_86003	gi|358485511|ref|NC_006088.3|GGA1	70.9	488	87	8	658	1093	4009235	4009719	5e-65	253	1390	M
SMAC_Scaffolded_contig_57258	gi|358485511|ref|NC_006088.3|GGA1	76.44	382	86	2	1037	1418	4009289	4009666	7e-72	279	1968	M
SMAC_Scaffolded_contig_42029	gi|358485511|ref|NC_006088.3|GGA1	72.21	331	71	7	153	467	4009716	4009391	4e-40	170	499	M
SMAC_Scaffolded_contig_16318	gi|358485511|ref|NC_006088.3|GGA1	67.95	1276	325	24	1966	3186	4012830	4011584	4e-116	425	617	M
SMAC_Scaffolded_contig_27837	gi|358485511|ref|NC_006088.3|GGA1	68.66	718	158	18	96	792	4015922	4015251	6e-67	260	2	S
SMAC_Scaffolded_contig_5990	gi|358485511|ref|NC_006088.3|GGA1	81.7	153	23	4	3116	3265	4017863	4017713	4e-29	136	1	S
SMAC_Scaffolded_contig_5991	gi|358485511|ref|NC_006088.3|GGA1	68.72	716	166	18	786	1470	4020366	4021054	8e-65	253	21289	M
SMAC_Scaffolded_contig_25515	gi|358485511|ref|NC_006088.3|GGA1	73.11	331	66	7	415	745	4022987	4022680	3e-44	185	1	S
SMAC_Scaffolded_contig_58296	gi|358485511|ref|NC_006088.3|GGA1	82.32	492	80	4	1871	2360	4024795	4025281	4e-134	484	2	M
SMAC_Scaffolded_contig_55836	gi|358485511|ref|NC_006088.3|GGA1	87.79	131	13	2	1032	1161	4027297	4027425	3e-36	158	388	M
SMAC_Scaffolded_contig_30293	gi|358485511|ref|NC_006088.3|GGA1	77.02	235	46	4	412	645	4028123	4027896	6e-40	170	2875	M
SMAC_Scaffolded_contig_30292	gi|358485511|ref|NC_006088.3|GGA1	67.15	901	214	30	277	1133	4028218	4029080	5e-58	230	11	M
SMAC_Scaffolded_contig_8432	gi|358485511|ref|NC_006088.3|GGA1	69.9	701	153	18	2476	3163	4032040	4031385	9e-74	284	4	S
SMAC_Scaffolded_contig_43496	gi|358485511|ref|NC_006088.3|GGA1	79.31	87	18	0	741	827	4034026	4033940	6e-12	77	45	M
SMAC_Scaffolded_contig_8433	gi|358485511|ref|NC_006088.3|GGA1	66.49	1695	359	66	202	1812	4034705	4036274	8e-105	387	1	S
SMAC_Scaffolded_contig_93285	gi|358485511|ref|NC_006088.3|GGA1	75.11	450	77	6	766	1181	4037609	4037161	2e-82	311	1	S
SMAC_Scaffolded_contig_43358	gi|358485511|ref|NC_006088.3|GGA1	67.72	1546	336	50	16	1471	4042806	4041334	6e-127	461	94	M
SMAC_Scaffolded_contig_11261	gi|358485511|ref|NC_006088.3|GGA1	75.29	688	116	19	3685	4351	4047250	4047904	8e-120	437	4	S
SMAC_Scaffolded_contig_13616	gi|358485511|ref|NC_006088.3|GGA1	73.19	2790	536	72	101	2765	4052990	4050288	0	1526	3	S
SMAC_Scaffolded_contig_13615	gi|358485511|ref|NC_006088.3|GGA1	67.72	917	216	24	53	932	4054152	4055025	5e-74	284	2	S
SMAC_Scaffolded_contig_95727	gi|358485511|ref|NC_006088.3|GGA1	72.98	744	140	14	1	719	4056205	4056912	1e-117	428	2	S
SMAC_Scaffolded_contig_104425	gi|358485511|ref|NC_006088.3|GGA1	73.62	436	89	8	1	422	4057526	4057103	9e-66	255	2	S
SMAC_Scaffolded_contig_60117	gi|358485511|ref|NC_006088.3|GGA1	76.47	1458	266	19	179	1601	4059050	4057635	0	1067	1	S
SMAC_Scaffolded_contig_88229	gi|358485511|ref|NC_006088.3|GGA1	74.73	938	186	14	24	922	4059461	4060386	3e-171	607	2	S
SMAC_Scaffolded_contig_58293	gi|358485511|ref|NC_006088.3|GGA1	73.59	496	101	10	364	831	4061907	4062400	1e-74	286	2	S
SMAC_Scaffolded_contig_30199	gi|358485511|ref|NC_006088.3|GGA1	73.03	1053	192	21	1841	2840	4064648	4065661	7e-171	607	4	S
SMAC_Scaffolded_contig_101619	gi|358485511|ref|NC_006088.3|GGA1	72.02	890	151	26	965	1777	4068759	4069627	5e-125	453	2	S
SMAC_Scaffolded_contig_14892	gi|358485511|ref|NC_006088.3|GGA1	71.42	1956	394	42	1837	3695	4072162	4070275	0	967	3	S
SMAC_Scaffolded_contig_113351	gi|358485511|ref|NC_006088.3|GGA1	73.93	1001	198	13	1558	2520	4075217	4074242	5e-177	627	3	S
SMAC_Scaffolded_contig_26477	gi|358485511|ref|NC_006088.3|GGA1	76.78	211	41	3	44	246	4081792	4081582	2e-34	154	2	S
SMAC_Scaffolded_contig_33304	gi|358485511|ref|NC_006088.3|GGA1	79.07	86	18	0	173	258	4082086	4082171	2e-11	75	4310	M
SMAC_Scaffolded_contig_9019	gi|358485511|ref|NC_006088.3|GGA1	78.52	149	27	3	1194	1340	4082182	4082037	3e-23	116	9	M
SMAC_Scaffolded_contig_99283	gi|358485511|ref|NC_006088.3|GGA1	73.24	1162	244	22	1074	2207	4084480	4083358	0	655	5	M
SMAC_Scaffolded_contig_117420	gi|358485511|ref|NC_006088.3|GGA1	72.62	2257	464	46	2191	4377	4087798	4089970	0	1216	4	S
SMAC_Scaffolded_contig_61822	gi|358485511|ref|NC_006088.3|GGA1	71.71	1803	337	31	30	1729	4090832	4092564	0	969	3	S
SMAC_Scaffolded_contig_109458	gi|358485511|ref|NC_006088.3|GGA1	77.94	340	52	7	371	701	4095706	4095381	5e-68	264	2	S
SMAC_Scaffolded_contig_191049	gi|358485511|ref|NC_006088.3|GGA1	85.71	42	4	2	4787	4826	4098576	4098617	0.69	42	16	M
SMAC_Scaffolded_contig_46854	gi|358485511|ref|NC_006088.3|GGA1	68.41	1450	277	35	467	1856	4099270	4097942	9e-156	556	1	S
SMAC_Scaffolded_contig_140405	gi|358485511|ref|NC_006088.3|GGA1	74.11	788	157	16	942	1704	4105877	4105112	2e-130	471	3	S
SMAC_Scaffolded_contig_61677	gi|358485511|ref|NC_006088.3|GGA1	96.67	30	0	1	107	136	4107925	4107953	0.007	46	18	M
SMAC_Scaffolded_contig_42899	gi|358485511|ref|NC_006088.3|GGA1	76.16	2555	465	40	1661	4107	4111045	4108527	0	1811	3067	M
SMAC_Scaffolded_contig_179345	gi|358485511|ref|NC_006088.3|GGA1	74.65	714	111	9	160	813	4113632	4114335	6e-138	495	1	S
SMAC_Scaffolded_contig_161007	gi|358485511|ref|NC_006088.3|GGA1	70.97	565	88	13	19	574	4114927	4114430	9e-77	291	1	S
SMAC_Scaffolded_contig_113776	gi|358485511|ref|NC_006088.3|GGA1	74.82	1378	270	26	296	1644	4118603	4117274	0	874	1896	M
SMAC_Scaffolded_contig_82845	gi|358485511|ref|NC_006088.3|GGA1	69.7	2472	467	59	35	2338	4122285	4119928	0	1070	2	S
SMAC_Scaffolded_contig_19088	gi|358485511|ref|NC_006088.3|GGA1	69.41	1216	236	28	283	1463	4128229	4127115	7e-143	513	2	S
SMAC_Scaffolded_contig_74535	gi|358485511|ref|NC_006088.3|GGA1	74.06	3292	616	70	1002	4197	4140399	4137250	0	1986	3999	M
SMAC_Scaffolded_contig_89253	gi|358485511|ref|NC_006088.3|GGA1	74.67	1050	182	14	1593	2602	4141130	4142135	0	708	58	M
SMAC_Scaffolded_contig_11631	gi|358485511|ref|NC_006088.3|GGA1	71.08	785	148	26	344	1088	4146488	4145743	4e-93	347	19	M
SMAC_Scaffolded_contig_11632	gi|358485511|ref|NC_006088.3|GGA1	69.62	1514	288	37	877	2293	4147491	4148929	0	645	11137	M
SMAC_Scaffolded_contig_122	gi|358485511|ref|NC_006088.3|GGA1	71.74	276	53	4	599	860	4159106	4158842	3e-34	150	1	S
SMAC_Scaffolded_contig_49138	gi|358485511|ref|NC_006088.3|GGA1	80	90	12	4	35	121	4159918	4160004	1e-09	69	57	M
SMAC_Scaffolded_contig_173251	gi|358485511|ref|NC_006088.3|GGA1	82.96	135	20	2	1	132	4162478	4162344	5e-29	134	158	M
SMAC_Scaffolded_contig_112444	gi|358485511|ref|NC_006088.3|GGA1	68.01	2835	566	88	815	3429	4163044	4165757	0	935	9563	M
SMAC_Scaffolded_contig_37365	gi|358485511|ref|NC_006088.3|GGA1	71.05	7160	1441	176	257	7126	4165883	4172700	0	3342	6	M
SMAC_Scaffolded_contig_45548	gi|358485511|ref|NC_006088.3|GGA1	77.98	4992	748	93	8730	13564	4186527	4191324	0	3945	15	S
SMAC_Scaffolded_contig_45549	gi|358485511|ref|NC_006088.3|GGA1	84.43	623	80	6	2325	2937	4200613	4199998	0	675	4	S
SMAC_Scaffolded_contig_91822	gi|358485511|ref|NC_006088.3|GGA1	88.82	483	50	3	1	482	4209684	4210163	7e-175	618	1	S
SMAC_Scaffolded_contig_46431	gi|358485511|ref|NC_006088.3|GGA1	82.65	1326	165	18	2907	4215	4213054	4214331	0	1332	3	S
SMAC_Scaffolded_contig_23254	gi|358485511|ref|NC_006088.3|GGA1	80.69	1020	146	11	2720	3704	4217547	4218550	0	948	4909	M
SMAC_Scaffolded_contig_46024	gi|358485511|ref|NC_006088.3|GGA1	75.42	1619	257	33	190	1751	4219066	4220600	0	1104	1	S
SMAC_Scaffolded_contig_42641	gi|358485511|ref|NC_006088.3|GGA1	82.8	314	47	3	444	755	4222870	4222562	3e-84	316	1	S
SMAC_Scaffolded_contig_84617	gi|358485511|ref|NC_006088.3|GGA1	82.72	81	14	0	781	861	4223613	4223533	5e-14	84	6786	M
SMAC_Scaffolded_contig_21142	gi|358485511|ref|NC_006088.3|GGA1	72.74	3012	517	80	5301	8190	4224996	4227825	0	1644	7	S
SMAC_Scaffolded_contig_43122	gi|358485511|ref|NC_006088.3|GGA1	79.17	7148	1059	103	11297	18139	4241570	4234548	0	6102	314	M
SMAC_Scaffolded_contig_66276	gi|358485511|ref|NC_006088.3|GGA1	72.65	223	45	4	471	690	4247262	4247471	4e-26	123	2	S
SMAC_Scaffolded_contig_83899	gi|358485511|ref|NC_006088.3|GGA1	76.57	1084	136	19	7512	8522	4249169	4248131	0	830	6	M
SMAC_Scaffolded_contig_186118	gi|358485511|ref|NC_006088.3|GGA1	74.26	272	51	6	1	257	4251680	4251413	3e-38	165	1	S
SMAC_Scaffolded_contig_94807	gi|358485511|ref|NC_006088.3|GGA1	85.71	238	27	3	198	432	4256740	4256973	3e-70	269	2	S
SMAC_Scaffolded_contig_50188	gi|358485511|ref|NC_006088.3|GGA1	76.51	2605	445	47	7649	10204	4261680	4259194	0	1878	3096	M
SMAC_Scaffolded_contig_179772	gi|358485511|ref|NC_006088.3|GGA1	84.14	763	104	9	1	760	4265599	4266347	0	805	1	S
SMAC_Scaffolded_contig_50189	gi|358485511|ref|NC_006088.3|GGA1	73.14	3559	671	76	1967	5327	4272318	4275789	0	2022	3	S
SMAC_Scaffolded_contig_2895	gi|358485511|ref|NC_006088.3|GGA1	76.84	1196	144	20	11460	12592	4281142	4280017	0	939	10	S
SMAC_Scaffolded_contig_131222	gi|358485511|ref|NC_006088.3|GGA1	68.53	626	92	12	96	678	4289398	4288835	8e-74	282	1	S
SMAC_Scaffolded_contig_180642	gi|358485511|ref|NC_006088.3|GGA1	89.35	169	16	2	42	208	4292998	4292830	2e-54	217	1	S
SMAC_Scaffolded_contig_180643	gi|358485511|ref|NC_006088.3|GGA1	88.68	53	5	1	5000	5051	4295676	4295728	6e-08	66	1	S
SMAC_Scaffolded_contig_102409	gi|358485511|ref|NC_006088.3|GGA1	94.12	170	9	1	2	170	4296840	4296671	7e-67	259	1	S
SMAC_Scaffolded_contig_165338	gi|358485511|ref|NC_006088.3|GGA1	89.05	137	9	2	693	825	4297001	4296867	7e-42	176	2	S
SMAC_Scaffolded_contig_14352	gi|358485511|ref|NC_006088.3|GGA1	71.8	2014	386	56	23	1966	4298592	4300493	0	984	4	S
SMAC_Scaffolded_contig_115748	gi|358485511|ref|NC_006088.3|GGA1	73.39	917	137	36	81	965	4298702	4297861	1e-135	488	2	M
SMAC_Scaffolded_contig_90672	gi|358485511|ref|NC_006088.3|GGA1	81.78	527	77	10	1052	1564	4303850	4304371	9e-136	489	6	M
SMAC_Scaffolded_contig_54603	gi|358485511|ref|NC_006088.3|GGA1	83.58	1730	202	10	5059	6769	4309066	4307400	0	1869	8	M
SMAC_Scaffolded_contig_90904	gi|358485511|ref|NC_006088.3|GGA1	77.65	841	106	10	32	835	4314687	4315482	0	699	1	S
SMAC_Scaffolded_contig_180735	gi|358485511|ref|NC_006088.3|GGA1	94.12	34	2	0	120	153	4316612	4316579	5e-05	53	118	M
SMAC_Scaffolded_contig_82523	gi|358485511|ref|NC_006088.3|GGA1	79.22	847	130	11	11564	12386	4318584	4317760	0	726	6	S
SMAC_Scaffolded_contig_111251	gi|358485511|ref|NC_006088.3|GGA1	74.28	521	98	11	2852	3345	4322819	4322308	4e-84	318	3	S
SMAC_Scaffolded_contig_169052	gi|358485511|ref|NC_006088.3|GGA1	80.43	235	38	1	2315	2541	4326543	4326777	2e-54	219	1	S
SMAC_Scaffolded_contig_68606	gi|358485511|ref|NC_006088.3|GGA1	78.53	2049	341	27	3497	5493	4334130	4332129	0	1680	7	S
SMAC_Scaffolded_contig_177388	gi|358485511|ref|NC_006088.3|GGA1	71.92	837	161	15	24	816	4337568	4338374	2e-124	450	1	S
SMAC_Scaffolded_contig_108082	gi|358485511|ref|NC_006088.3|GGA1	75.06	1612	295	32	779	2332	4345079	4343517	0	1047	2	S
SMAC_Scaffolded_contig_68607	gi|358485511|ref|NC_006088.3|GGA1	77.47	2907	420	50	13463	16244	4345086	4347882	0	2277	9082	M
SMAC_Scaffolded_contig_187961	gi|358485511|ref|NC_006088.3|GGA1	83.58	67	9	2	279	344	4359772	4359707	3e-08	64	1215	M
SMAC_Scaffolded_contig_96483	gi|358485511|ref|NC_006088.3|GGA1	85.37	1210	139	12	176	1355	4360994	4359793	0	1364	1	S
SMAC_Scaffolded_contig_64277	gi|358485511|ref|NC_006088.3|GGA1	75.8	1558	262	19	2727	4213	4365956	4364443	0	1128	9	S
SMAC_Scaffolded_contig_72842	gi|358485511|ref|NC_006088.3|GGA1	75.08	5240	933	83	1	5047	4376419	4371360	0	3525	3	S
SMAC_Scaffolded_contig_87093	gi|358485511|ref|NC_006088.3|GGA1	89.71	68	5	2	626	691	4390607	4390674	3e-14	84	17400	M
SMAC_Scaffolded_contig_47740	gi|358485511|ref|NC_006088.3|GGA1	79.01	1720	297	18	12421	14112	4390750	4392433	0	1451	16389	M
SMAC_Scaffolded_contig_154876	gi|358485511|ref|NC_006088.3|GGA1	79.49	1385	165	30	1	1314	4398098	4396762	0	1189	5	S
SMAC_Scaffolded_contig_141306	gi|358485511|ref|NC_006088.3|GGA1	77.66	1383	214	21	536	1873	4399708	4401040	0	1092	2	S
SMAC_Scaffolded_contig_131282	gi|358485511|ref|NC_006088.3|GGA1	78.55	2583	377	44	311	2798	4402467	4404967	0	2122	1	S
SMAC_Scaffolded_contig_67205	gi|358485511|ref|NC_006088.3|GGA1	76.04	1728	285	27	623	2325	4405790	4407413	0	1245	3	S
SMAC_Scaffolded_contig_126411	gi|358485511|ref|NC_006088.3|GGA1	81.75	1348	200	22	265	1602	4410514	4411825	0	1265	77	M
SMAC_Scaffolded_contig_28510	gi|358485511|ref|NC_006088.3|GGA1	78.01	2351	390	40	8064	10361	4415333	4413057	0	1844	1283	M
SMAC_Scaffolded_contig_18251	gi|358485511|ref|NC_006088.3|GGA1	83.8	142	23	0	1817	1958	4415499	4415358	3e-34	152	2287	M
SMAC_Scaffolded_contig_120796	gi|358485511|ref|NC_006088.3|GGA1	75.49	2456	422	51	413	2787	4428410	4426054	0	1647	2	S
SMAC_Scaffolded_contig_86246	gi|358485511|ref|NC_006088.3|GGA1	71.1	4422	848	88	71	4244	4429245	4433484	0	2205	1	S
SMAC_Scaffolded_contig_94765	gi|358485511|ref|NC_006088.3|GGA1	72.69	1816	332	33	27	1739	4435446	4437200	0	1038	5	S
SMAC_Scaffolded_contig_152206	gi|358485511|ref|NC_006088.3|GGA1	64.23	699	154	18	15	661	4441721	4442375	4e-31	140	1	S
SMAC_Scaffolded_contig_187421	gi|358485511|ref|NC_006088.3|GGA1	67.33	202	61	1	290	486	4446075	4446276	2e-09	68	39	M
SMAC_Scaffolded_contig_40564	gi|358485511|ref|NC_006088.3|GGA1	78.65	787	146	7	674	1453	4448186	4448957	0	650	1404	M
SMAC_Scaffolded_contig_68445	gi|358485511|ref|NC_006088.3|GGA1	75.36	1177	187	28	2939	4054	4451841	4450707	0	782	967	M
SMAC_Scaffolded_contig_73790	gi|358485511|ref|NC_006088.3|GGA1	72.62	767	133	21	33	753	4464935	4465670	5e-113	412	1	S
SMAC_Scaffolded_contig_131123	gi|358485511|ref|NC_006088.3|GGA1	86.35	337	39	4	80	414	4466661	4466992	4e-106	389	1	S
SMAC_Scaffolded_contig_46286	gi|358485511|ref|NC_006088.3|GGA1	75.31	3216	580	62	38585	41672	4494128	4497257	0	2134	12099	M
SMAC_Scaffolded_contig_56371	gi|358485511|ref|NC_006088.3|GGA1	74.94	3160	573	64	1	3028	4494185	4497257	0	2037	1	S
SMAC_Scaffolded_contig_57737	gi|358485511|ref|NC_006088.3|GGA1	83.64	1235	155	16	269	1479	4510771	4511982	0	1287	4	S
SMAC_Scaffolded_contig_80244	gi|358485511|ref|NC_006088.3|GGA1	78.37	2866	482	48	151	2951	4521886	4519094	0	2282	5	S
SMAC_Scaffolded_contig_86024	gi|358485511|ref|NC_006088.3|GGA1	86.24	1403	161	9	467	1851	4525430	4524042	0	1649	3	S
SMAC_Scaffolded_contig_86025	gi|358485511|ref|NC_006088.3|GGA1	80.76	1367	219	14	92	1432	4526038	4527386	0	1256	3	S
SMAC_Scaffolded_contig_2402	gi|358485511|ref|NC_006088.3|GGA1	79.47	4185	671	55	4352	8429	4533512	4537615	0	3597	6857	M
SMAC_Scaffolded_contig_82075	gi|358485511|ref|NC_006088.3|GGA1	71.29	3664	747	89	1458	4939	4547900	4551440	0	1739	3	S
SMAC_Scaffolded_contig_177976	gi|358485511|ref|NC_006088.3|GGA1	78.02	91	16	3	378	466	4558436	4558524	3e-08	64	91	M
SMAC_Scaffolded_contig_162472	gi|358485511|ref|NC_006088.3|GGA1	73.57	1574	338	32	1	1563	4574692	4573186	0	890	1	S
SMAC_Scaffolded_contig_77169	gi|358485511|ref|NC_006088.3|GGA1	75.97	1398	241	28	4	1341	4578837	4577475	0	966	2	S
SMAC_Scaffolded_contig_33002	gi|358485511|ref|NC_006088.3|GGA1	78.7	1836	296	36	660	2446	4582612	4580823	0	1472	3	S
SMAC_Scaffolded_contig_178470	gi|358485511|ref|NC_006088.3|GGA1	80.24	820	92	17	15	780	4583907	4583104	0	735	1	S
SMAC_Scaffolded_contig_162391	gi|358485511|ref|NC_006088.3|GGA1	66.43	283	62	8	406	670	4584303	4584570	5e-12	77	70	M
SMAC_Scaffolded_contig_12717	gi|358485511|ref|NC_006088.3|GGA1	75.28	1529	268	27	5324	6778	4588032	4586540	0	1031	5	S
SMAC_Scaffolded_contig_157139	gi|358485511|ref|NC_006088.3|GGA1	78.3	1848	304	27	1279	3074	4597257	4595455	0	1490	3	S
SMAC_Scaffolded_contig_92524	gi|358485511|ref|NC_006088.3|GGA1	93.1	29	2	0	977	1005	4599056	4599028	0.041	44	62	M
SMAC_Scaffolded_contig_46988	gi|358485511|ref|NC_006088.3|GGA1	74.29	910	183	18	2	875	4600982	4600088	2e-154	551	2	S
SMAC_Scaffolded_contig_103770	gi|358485511|ref|NC_006088.3|GGA1	71.81	2990	561	80	644	3505	4601728	4604563	0	1485	2	S
SMAC_Scaffolded_contig_177867	gi|358485511|ref|NC_006088.3|GGA1	79.49	78	16	0	38	115	4605118	4605195	6e-10	69	48	M
SMAC_Scaffolded_contig_58824	gi|358485511|ref|NC_006088.3|GGA1	76.46	1440	270	19	2543	3945	4610424	4611831	0	1045	812	M
SMAC_Scaffolded_contig_124766	gi|358485511|ref|NC_006088.3|GGA1	76.1	1473	246	24	462	1899	4612622	4614023	0	1058	1	S
SMAC_Scaffolded_contig_171188	gi|358485511|ref|NC_006088.3|GGA1	86.67	45	6	0	893	937	4616651	4616695	2e-05	55	112	M
SMAC_Scaffolded_contig_118509	gi|358485511|ref|NC_006088.3|GGA1	77.59	2735	470	45	120	2743	4618295	4615593	0	2094	1	S
SMAC_Scaffolded_contig_16785	gi|358485511|ref|NC_006088.3|GGA1	85.49	579	62	8	662	1222	4621412	4620838	0	650	3	S
SMAC_Scaffolded_contig_40815	gi|358485511|ref|NC_006088.3|GGA1	91.23	57	4	1	1	57	4621481	4621426	1e-11	77	1618	M
SMAC_Scaffolded_contig_55428	gi|358485511|ref|NC_006088.3|GGA1	75.09	831	133	17	4964	5788	4623018	4622256	2e-155	556	3	S
SMAC_Scaffolded_contig_16784	gi|358485511|ref|NC_006088.3|GGA1	72.46	679	132	11	1750	2402	4625716	4626365	3e-103	381	3	S
SMAC_Scaffolded_contig_42278	gi|358485511|ref|NC_006088.3|GGA1	72.17	1053	231	17	1880	2876	4629412	4628366	3e-156	558	3	S
SMAC_Scaffolded_contig_28291	gi|358485511|ref|NC_006088.3|GGA1	70.5	1634	293	40	1935	3494	4630380	4631898	0	764	905	M
SMAC_Scaffolded_contig_64941	gi|358485511|ref|NC_006088.3|GGA1	84.74	662	92	4	1513	2174	4633910	4634562	0	729	3	S
SMAC_Scaffolded_contig_180742	gi|358485511|ref|NC_006088.3|GGA1	74.18	577	130	7	124	686	4636681	4636110	1e-95	354	1	S
SMAC_Scaffolded_contig_170260	gi|358485511|ref|NC_006088.3|GGA1	76.55	1002	208	10	1531	2518	4637724	4636736	0	728	1	S
SMAC_Scaffolded_contig_77802	gi|358485511|ref|NC_006088.3|GGA1	74.19	713	130	16	374	1057	4640675	4639988	3e-119	434	2	S
SMAC_Scaffolded_contig_145347	gi|358485511|ref|NC_006088.3|GGA1	73.12	863	189	17	2	834	4648860	4648011	2e-131	473	1	S
SMAC_Scaffolded_contig_4115	gi|358485511|ref|NC_006088.3|GGA1	76.41	3184	611	50	5163	8263	4660181	4657055	0	2257	35478	M
SMAC_Scaffolded_contig_151792	gi|358485511|ref|NC_006088.3|GGA1	75	548	109	11	527	1062	4665352	4664821	3e-93	347	1	S
SMAC_Scaffolded_contig_173023	gi|358485511|ref|NC_006088.3|GGA1	76.15	130	27	2	27	154	4667028	4666901	6e-16	89	43	M
SMAC_Scaffolded_contig_24444	gi|358485511|ref|NC_006088.3|GGA1	77.43	1440	269	23	11002	12407	4668552	4667135	0	1079	13676	M
SMAC_Scaffolded_contig_121179	gi|358485511|ref|NC_006088.3|GGA1	79.59	1798	277	22	6028	7792	4683459	4681719	0	1570	10	M
SMAC_Scaffolded_contig_112398	gi|358485511|ref|NC_006088.3|GGA1	77.64	1279	231	18	4541	5796	4692628	4691382	0	985	5	S
SMAC_Scaffolded_contig_63929	gi|358485511|ref|NC_006088.3|GGA1	71.29	202	50	6	1548	1747	4697228	4697423	8e-14	84	155	M
SMAC_Scaffolded_contig_112782	gi|358485511|ref|NC_006088.3|GGA1	76.31	996	184	15	1517	2475	4699650	4698670	0	711	5	S
SMAC_Scaffolded_contig_112781	gi|358485511|ref|NC_006088.3|GGA1	75.35	426	94	5	90	508	4701356	4701777	2e-73	282	10	M
SMAC_Scaffolded_contig_80113	gi|358485511|ref|NC_006088.3|GGA1	76.45	2798	474	56	5434	8157	4712766	4710080	0	1990	7674	M
SMAC_Scaffolded_contig_86591	gi|358485511|ref|NC_006088.3|GGA1	75.81	2625	445	51	324	2891	4721303	4718812	0	1813	33	M
SMAC_Scaffolded_contig_86592	gi|358485511|ref|NC_006088.3|GGA1	71.44	3509	680	73	243	3617	4722095	4725415	0	1772	1803	M
SMAC_Scaffolded_contig_192183	gi|358485511|ref|NC_006088.3|GGA1	75.9	166	35	2	539	703	4725528	4725689	2e-23	114	1	S
SMAC_Scaffolded_contig_55677	gi|358485511|ref|NC_006088.3|GGA1	74.12	4649	866	92	33301	37808	4730464	4726012	0	2850	25	M
SMAC_Scaffolded_contig_190541	gi|358485511|ref|NC_006088.3|GGA1	70.07	274	76	6	199	469	4736804	4737074	2e-19	104	43	M
SMAC_Scaffolded_contig_49317	gi|358485511|ref|NC_006088.3|GGA1	69.29	368	82	7	577	917	4737084	4736721	4e-34	150	28	M
SMAC_Scaffolded_contig_108133	gi|358485511|ref|NC_006088.3|GGA1	75.9	83	16	3	485	566	4738011	4738090	0.001	50	151	M
SMAC_Scaffolded_contig_152642	gi|358485511|ref|NC_006088.3|GGA1	74.46	1347	191	25	214	1443	4753259	4751949	0	904	1	S
SMAC_Scaffolded_contig_83099	gi|358485511|ref|NC_006088.3|GGA1	80.38	1544	240	23	10375	11905	4759053	4760546	0	1371	11	S
SMAC_Scaffolded_contig_25482	gi|358485511|ref|NC_006088.3|GGA1	72.7	1000	214	21	1643	2601	4763409	4764390	9e-148	531	12557	M
SMAC_Scaffolded_contig_36875	gi|358485511|ref|NC_006088.3|GGA1	73.71	4291	760	84	13	4139	4774966	4770880	0	2607	5	M
SMAC_Scaffolded_contig_123852	gi|358485511|ref|NC_006088.3|GGA1	65.83	1071	227	31	213	1208	4776427	4775421	4e-69	268	2	S
SMAC_Scaffolded_contig_20196	gi|358485511|ref|NC_006088.3|GGA1	73.65	1708	334	26	5599	7250	4782561	4780914	0	1040	10	S
SMAC_Scaffolded_contig_46992	gi|358485511|ref|NC_006088.3|GGA1	79.38	1775	268	26	2536	4241	4789615	4791360	0	1523	11	M
SMAC_Scaffolded_contig_164589	gi|358485511|ref|NC_006088.3|GGA1	80.06	662	91	13	1	630	4797664	4797012	5e-163	578	1	S
SMAC_Scaffolded_contig_53074	gi|358485511|ref|NC_006088.3|GGA1	74.93	3331	633	50	8607	11837	4812135	4808907	0	2199	9	S
SMAC_Scaffolded_contig_155827	gi|358485511|ref|NC_006088.3|GGA1	92.39	197	14	1	1969	2165	4813635	4813830	5e-74	284	1	S
SMAC_Scaffolded_contig_180341	gi|358485511|ref|NC_006088.3|GGA1	69.39	343	71	6	256	564	4823142	4823484	7e-34	149	1	S
SMAC_Scaffolded_contig_38780	gi|358485511|ref|NC_006088.3|GGA1	74.26	1651	312	25	2117	3745	4823755	4825314	0	1050	6183	M
SMAC_Scaffolded_contig_22724	gi|358485511|ref|NC_006088.3|GGA1	72.44	3490	683	62	5981	9299	4825328	4828709	0	1929	1207	M
SMAC_Scaffolded_contig_124398	gi|358485511|ref|NC_006088.3|GGA1	77.69	1654	291	23	1372	2997	4837429	4839032	0	1287	2	S
SMAC_Scaffolded_contig_176934	gi|358485511|ref|NC_006088.3|GGA1	72.12	226	50	5	288	511	4842757	4842971	5e-23	113	1	S
SMAC_Scaffolded_contig_50244	gi|358485511|ref|NC_006088.3|GGA1	89.75	244	24	1	1017	1259	4844531	4844288	4e-86	324	3	S
SMAC_Scaffolded_contig_114924	gi|358485511|ref|NC_006088.3|GGA1	77.29	1805	307	22	160	1884	4848542	4846761	0	1400	3	S
SMAC_Scaffolded_contig_114923	gi|358485511|ref|NC_006088.3|GGA1	70.39	993	202	19	1	987	4849209	4850115	5e-134	482	1	S
SMAC_Scaffolded_contig_75160	gi|358485511|ref|NC_006088.3|GGA1	76.77	2850	474	48	405	3144	4855510	4852739	0	2109	1	S
SMAC_Scaffolded_contig_8129	gi|358485511|ref|NC_006088.3|GGA1	76.23	3463	562	62	6041	9341	4856926	4860289	0	2491	9777	M
SMAC_Scaffolded_contig_110698	gi|358485511|ref|NC_006088.3|GGA1	91.67	36	0	2	2162	2194	4864426	4864461	0.025	46	89	M
SMAC_Scaffolded_contig_65551	gi|358485511|ref|NC_006088.3|GGA1	77.37	3434	575	54	454	3744	4878800	4875426	0	2628	1	S
SMAC_Scaffolded_contig_56605	gi|358485511|ref|NC_006088.3|GGA1	76.47	1088	214	18	1392	2445	4882091	4883170	0	765	2	S
SMAC_Scaffolded_contig_56604	gi|358485511|ref|NC_006088.3|GGA1	76.35	3818	689	59	925	4625	4885811	4882091	0	2742	5	S
SMAC_Scaffolded_contig_133728	gi|358485511|ref|NC_006088.3|GGA1	67.24	2659	572	74	45	2545	4889227	4886710	0	805	1	S
SMAC_Scaffolded_contig_118869	gi|358485511|ref|NC_006088.3|GGA1	76.67	1329	219	22	469	1768	4891699	4890433	0	982	2	S
SMAC_Scaffolded_contig_118868	gi|358485511|ref|NC_006088.3|GGA1	75	404	71	9	160	559	4892934	4893311	2e-67	260	1	S
SMAC_Scaffolded_contig_168623	gi|358485511|ref|NC_006088.3|GGA1	74.94	854	151	14	204	1025	4894838	4895660	7e-160	569	1	S
SMAC_Scaffolded_contig_170868	gi|358485511|ref|NC_006088.3|GGA1	72.41	975	205	18	311	1258	4896768	4897705	7e-146	522	1	S
SMAC_Scaffolded_contig_109705	gi|358485511|ref|NC_006088.3|GGA1	64.35	2073	514	64	8	1925	4906364	4904362	3e-85	322	2	S
SMAC_Scaffolded_contig_9831	gi|358485511|ref|NC_006088.3|GGA1	73.62	1357	275	21	1884	3187	4940011	4938685	0	814	2	S
SMAC_Scaffolded_contig_180297	gi|358485511|ref|NC_006088.3|GGA1	70.4	598	142	12	66	650	4942441	4943016	9e-67	259	1	S
SMAC_Scaffolded_contig_9206	gi|358485511|ref|NC_006088.3|GGA1	71.61	2666	551	41	52142	54642	4954025	4956649	0	1397	15726	M
SMAC_Scaffolded_contig_104494	gi|358485511|ref|NC_006088.3|GGA1	71.34	2219	416	52	4	2089	4977133	4975002	0	1099	62	M
SMAC_Scaffolded_contig_130941	gi|358485511|ref|NC_006088.3|GGA1	68.89	884	182	25	3541	4376	4978464	4977626	4e-86	325	2	S
SMAC_Scaffolded_contig_105729	gi|358485511|ref|NC_006088.3|GGA1	70.14	2160	451	49	613	2678	4981814	4979755	0	942	1	S
SMAC_Scaffolded_contig_118636	gi|358485511|ref|NC_006088.3|GGA1	70.13	596	139	19	13	602	4989100	4989662	4e-56	223	1	S
SMAC_Scaffolded_contig_154173	gi|358485511|ref|NC_006088.3|GGA1	75.46	1642	294	28	30	1607	4990403	4991999	0	1117	1	S
SMAC_Scaffolded_contig_103163	gi|358485511|ref|NC_006088.3|GGA1	76.31	1562	279	21	7692	9221	4997603	4999105	0	1148	7	M
SMAC_Scaffolded_contig_61913	gi|358485511|ref|NC_006088.3|GGA1	73.21	1635	323	32	1	1555	5002278	5003877	0	949	1	S
SMAC_Scaffolded_contig_25757	gi|358485511|ref|NC_006088.3|GGA1	74.45	3033	504	54	3681	6565	5010154	5007245	0	1977	636	M
SMAC_Scaffolded_contig_164278	gi|358485511|ref|NC_006088.3|GGA1	68.67	316	77	8	1	306	5010499	5010802	2e-21	107	1	S
SMAC_Scaffolded_contig_22151	gi|358485511|ref|NC_006088.3|GGA1	70.86	1637	330	37	4268	5871	5016744	5018266	0	767	4	M
SMAC_Scaffolded_contig_130644	gi|358485511|ref|NC_006088.3|GGA1	77.06	1251	232	12	485	1704	5021896	5020670	0	958	3	S
SMAC_Scaffolded_contig_147912	gi|358485511|ref|NC_006088.3|GGA1	74.85	171	35	2	1	164	5022459	5022628	5e-23	113	1	S
SMAC_Scaffolded_contig_145080	gi|358485511|ref|NC_006088.3|GGA1	67.98	228	50	7	444	668	5022948	5023155	2e-10	71	237	M
SMAC_Scaffolded_contig_84159	gi|358485511|ref|NC_006088.3|GGA1	70.5	1827	343	35	10058	11832	5025142	5023460	0	884	7644	M
SMAC_Scaffolded_contig_134600	gi|358485511|ref|NC_006088.3|GGA1	76.94	772	134	16	402	1153	5030463	5029716	1e-156	558	3	S
SMAC_Scaffolded_contig_110520	gi|358485511|ref|NC_006088.3|GGA1	69.5	1223	276	25	338	1530	5038245	5039400	2e-138	499	453	M
SMAC_Scaffolded_contig_152609	gi|358485511|ref|NC_006088.3|GGA1	76.92	338	37	5	490	791	5042012	5041680	3e-71	273	2	S
SMAC_Scaffolded_contig_99333	gi|358485511|ref|NC_006088.3|GGA1	77.36	265	53	1	1796	2053	5042806	5042542	9e-52	210	1	S
SMAC_Scaffolded_contig_99332	gi|358485511|ref|NC_006088.3|GGA1	68.57	1454	355	34	981	2370	5043977	5045392	9e-139	500	2	S
SMAC_Scaffolded_contig_126458	gi|358485511|ref|NC_006088.3|GGA1	75.82	91	17	1	420	505	5049972	5049882	6e-09	66	39	M
SMAC_Scaffolded_contig_92665	gi|358485511|ref|NC_006088.3|GGA1	84.09	44	6	1	340	382	5050157	5050114	0.058	44	158	M
SMAC_Scaffolded_contig_176400	gi|358485511|ref|NC_006088.3|GGA1	71.72	198	48	4	552	746	5050248	5050440	1e-16	95	36	M
SMAC_Scaffolded_contig_134112	gi|358485511|ref|NC_006088.3|GGA1	75	92	21	2	425	515	5050380	5050470	2e-05	55	319	M
SMAC_Scaffolded_contig_85215	gi|358485511|ref|NC_006088.3|GGA1	73.31	326	56	8	1225	1527	5050422	5050105	3e-45	188	4	M
SMAC_Scaffolded_contig_24791	gi|358485511|ref|NC_006088.3|GGA1	76.23	408	81	7	1235	1637	5050429	5050033	3e-73	282	946	M
SMAC_Scaffolded_contig_144733	gi|358485511|ref|NC_006088.3|GGA1	70.78	421	89	9	272	674	5051438	5051034	7e-48	196	1	S
SMAC_Scaffolded_contig_92220	gi|358485511|ref|NC_006088.3|GGA1	77.66	2265	373	30	5673	7851	5053008	5055225	0	1788	5	S
SMAC_Scaffolded_contig_20432	gi|358485511|ref|NC_006088.3|GGA1	72.78	1135	216	22	746	1825	5056915	5058011	2e-180	639	7	S
SMAC_Scaffolded_contig_173125	gi|358485511|ref|NC_006088.3|GGA1	70	270	62	7	67	326	5060060	5060320	3e-21	107	1	S
SMAC_Scaffolded_contig_3	gi|358485511|ref|NC_006088.3|GGA1	79.19	1105	204	16	4471	5555	5069487	5070585	0	908	248	M
SMAC_Scaffolded_contig_98223	gi|358485511|ref|NC_006088.3|GGA1	79.33	2463	420	28	26	2438	5075664	5078087	0	2102	1	S
SMAC_Scaffolded_contig_154290	gi|358485511|ref|NC_006088.3|GGA1	70.78	1653	312	30	431	1974	5082089	5080499	0	848	1	S
SMAC_Scaffolded_contig_132374	gi|358485511|ref|NC_006088.3|GGA1	68.33	521	119	8	455	961	5082904	5083392	3e-49	201	1	S
SMAC_Scaffolded_contig_138415	gi|358485511|ref|NC_006088.3|GGA1	81.4	43	8	0	1872	1914	5086466	5086508	0.28	42	5	M
SMAC_Scaffolded_contig_56794	gi|358485511|ref|NC_006088.3|GGA1	72.02	1612	344	33	2973	4532	5086958	5085402	0	821	20	M
SMAC_Scaffolded_contig_161729	gi|358485511|ref|NC_006088.3|GGA1	77.55	147	26	2	501	645	5090217	5090358	2e-23	114	2	S
SMAC_Scaffolded_contig_137720	gi|358485511|ref|NC_006088.3|GGA1	73.14	1519	307	24	65	1527	5092386	5090913	0	883	1	S
SMAC_Scaffolded_contig_92907	gi|358485511|ref|NC_006088.3|GGA1	73.9	364	81	5	124	482	5092865	5092511	1e-54	219	1	S
SMAC_Scaffolded_contig_171265	gi|358485511|ref|NC_006088.3|GGA1	68.08	614	130	15	3	589	5093054	5093628	6e-54	215	1	S
SMAC_Scaffolded_contig_90851	gi|358485511|ref|NC_006088.3|GGA1	78.1	1087	137	28	1122	2159	5093754	5094788	0	852	254	M
SMAC_Scaffolded_contig_168479	gi|358485511|ref|NC_006088.3|GGA1	89.73	263	25	1	338	600	5097372	5097112	1e-94	351	1	S
SMAC_Scaffolded_contig_105608	gi|358485511|ref|NC_006088.3|GGA1	75.84	1776	321	34	3803	5515	5100271	5098541	0	1213	3	S
SMAC_Scaffolded_contig_153653	gi|358485511|ref|NC_006088.3|GGA1	81.82	979	147	9	7	957	5103640	5104615	0	951	1	S
SMAC_Scaffolded_contig_80381	gi|358485511|ref|NC_006088.3|GGA1	77.76	1812	281	25	21	1740	5104609	5106390	0	1449	1	S
SMAC_Scaffolded_contig_63432	gi|358485511|ref|NC_006088.3|GGA1	72.32	925	160	26	1	885	5107473	5106605	4e-134	484	4	S
SMAC_Scaffolded_contig_75204	gi|358485511|ref|NC_006088.3|GGA1	79.08	239	50	0	679	917	5111092	5110854	7e-51	206	7219	M
SMAC_Scaffolded_contig_150672	gi|358485511|ref|NC_006088.3|GGA1	80.78	562	91	7	1	558	5113537	5112989	5e-143	511	1	S
SMAC_Scaffolded_contig_106659	gi|358485511|ref|NC_006088.3|GGA1	72.62	1523	301	36	2249	3707	5115492	5114022	0	809	2	S
SMAC_Scaffolded_contig_106019	gi|358485511|ref|NC_006088.3|GGA1	74.28	1979	404	27	5681	7575	5119572	5117615	0	1247	2	S
SMAC_Scaffolded_contig_97196	gi|358485511|ref|NC_006088.3|GGA1	74.22	512	107	10	3	501	5126575	5126076	1e-80	307	2	S
SMAC_Scaffolded_contig_74612	gi|358485511|ref|NC_006088.3|GGA1	85.41	514	64	2	5	511	5127153	5126644	6e-167	590	1	S
SMAC_Scaffolded_contig_133595	gi|358485511|ref|NC_006088.3|GGA1	76.47	1279	233	26	483	1731	5129709	5128469	0	893	2	S
SMAC_Scaffolded_contig_145302	gi|358485511|ref|NC_006088.3|GGA1	75.85	265	63	1	501	764	5147265	5147001	4e-45	187	1	S
SMAC_Scaffolded_contig_84561	gi|358485511|ref|NC_006088.3|GGA1	71.21	4022	872	69	4500	8377	5156866	5152987	0	1979	225	M
SMAC_Scaffolded_contig_148648	gi|358485511|ref|NC_006088.3|GGA1	73.58	458	79	9	627	1050	5156890	5157339	1e-72	279	1	S
SMAC_Scaffolded_contig_129202	gi|358485511|ref|NC_006088.3|GGA1	73.44	1461	294	20	6966	8393	5162793	5161394	0	881	74	M
SMAC_Scaffolded_contig_140455	gi|358485511|ref|NC_006088.3|GGA1	85.41	665	79	4	161	811	5162859	5163519	0	760	1	S
SMAC_Scaffolded_contig_32171	gi|358485511|ref|NC_006088.3|GGA1	84.85	66	10	0	264	329	5168689	5168624	2e-11	75	13057	M
SMAC_Scaffolded_contig_40006	gi|358485511|ref|NC_006088.3|GGA1	74.24	2217	408	43	2297	4419	5181219	5179072	0	1377	149	M
SMAC_Scaffolded_contig_12537	gi|358485511|ref|NC_006088.3|GGA1	71.51	1039	216	18	2727	3755	5186583	5187551	4e-148	531	2	S
SMAC_Scaffolded_contig_56776	gi|358485511|ref|NC_006088.3|GGA1	74.84	966	213	10	468	1406	5190398	5189436	7e-178	628	13547	M
SMAC_Scaffolded_contig_135156	gi|358485511|ref|NC_006088.3|GGA1	64.66	498	109	12	224	712	5197230	5196791	2e-22	111	1	S
SMAC_Scaffolded_contig_79299	gi|358485511|ref|NC_006088.3|GGA1	73.64	2291	400	41	804	3028	5201080	5198928	0	1407	10280	M
SMAC_Scaffolded_contig_38625	gi|358485511|ref|NC_006088.3|GGA1	73.75	2320	438	33	10958	13176	5215678	5217927	0	1443	3862	M
SMAC_Scaffolded_contig_188212	gi|358485511|ref|NC_006088.3|GGA1	72.81	331	78	5	1725	2051	5220881	5221203	2e-42	179	1	S
SMAC_Scaffolded_contig_12045	gi|358485511|ref|NC_006088.3|GGA1	73.36	3311	618	68	119	3368	5226834	5229941	0	1927	2	S
SMAC_Scaffolded_contig_5791	gi|358485511|ref|NC_006088.3|GGA1	72.89	2991	560	58	509	3387	5234848	5237699	0	1703	7566	M
SMAC_Scaffolded_contig_156461	gi|358485511|ref|NC_006088.3|GGA1	70.31	293	64	6	1	288	5239712	5239986	2e-28	131	1	S
SMAC_Scaffolded_contig_5792	gi|358485511|ref|NC_006088.3|GGA1	73.5	532	112	10	587	1096	5246034	5245510	8e-81	306	11208	M
SMAC_Scaffolded_contig_88252	gi|358485511|ref|NC_006088.3|GGA1	73.07	1259	248	28	1302	2536	5262284	5263475	0	699	3	S
SMAC_Scaffolded_contig_170330	gi|358485511|ref|NC_006088.3|GGA1	68.95	673	116	13	5	629	5264815	5264188	2e-78	297	1	S
SMAC_Scaffolded_contig_144973	gi|358485511|ref|NC_006088.3|GGA1	68.09	470	120	10	523	976	5267121	5267576	3e-35	154	1	S
SMAC_Scaffolded_contig_166387	gi|358485511|ref|NC_006088.3|GGA1	72.17	1491	308	32	526	1967	5268511	5269943	0	771	8	M
SMAC_Scaffolded_contig_75906	gi|358485511|ref|NC_006088.3|GGA1	74.92	1208	227	18	1705	2904	5271138	5269999	0	800	26	M
SMAC_Scaffolded_contig_148202	gi|358485511|ref|NC_006088.3|GGA1	76.45	259	56	2	274	532	5271148	5271401	7e-46	188	1	S
SMAC_Scaffolded_contig_155783	gi|358485511|ref|NC_006088.3|GGA1	69.33	388	88	10	184	551	5274234	5274610	7e-33	147	1	S
SMAC_Scaffolded_contig_28225	gi|358485511|ref|NC_006088.3|GGA1	72.92	2068	402	45	14030	16008	5284057	5286055	0	1144	33	M
SMAC_Scaffolded_contig_158748	gi|358485511|ref|NC_006088.3|GGA1	79.41	442	73	5	328	763	5286416	5285987	9e-104	381	1	S
SMAC_Scaffolded_contig_45732	gi|358485511|ref|NC_006088.3|GGA1	75.46	2465	434	37	3	2363	5297806	5295409	0	1705	1	S
SMAC_Scaffolded_contig_45731	gi|358485511|ref|NC_006088.3|GGA1	75.32	4793	853	71	8348	12988	5298097	5302711	0	3288	46	M
SMAC_Scaffolded_contig_50846	gi|358485511|ref|NC_006088.3|GGA1	71.78	4373	901	92	19389	23655	5326945	5331090	0	2208	2914	M
SMAC_Scaffolded_contig_114384	gi|358485511|ref|NC_006088.3|GGA1	68.75	160	41	4	18	175	5335726	5335878	3e-05	53	49	M
SMAC_Scaffolded_contig_88798	gi|358485511|ref|NC_006088.3|GGA1	84	1194	164	12	82	1260	5337404	5336223	0	1263	2	S
SMAC_Scaffolded_contig_31977	gi|358485511|ref|NC_006088.3|GGA1	78.7	3004	501	47	6711	9650	5345563	5348491	0	2446	13	M
SMAC_Scaffolded_contig_37388	gi|358485511|ref|NC_006088.3|GGA1	75.79	95	17	6	321	412	5346511	5346420	0.006	46	47	M
SMAC_Scaffolded_contig_33698	gi|358485511|ref|NC_006088.3|GGA1	74.72	1618	310	28	5443	7030	5364187	5362639	0	1038	134	M
SMAC_Scaffolded_contig_47717	gi|358485511|ref|NC_006088.3|GGA1	76.75	1570	260	30	66	1562	5370714	5372251	0	1146	5	S
SMAC_Scaffolded_contig_35664	gi|358485511|ref|NC_006088.3|GGA1	69.49	2773	600	63	2282	4901	5376477	5379156	0	1124	1	S
SMAC_Scaffolded_contig_157506	gi|358485511|ref|NC_006088.3|GGA1	86.13	346	36	4	1479	1824	5380714	5381047	2e-109	401	2	S
SMAC_Scaffolded_contig_190904	gi|358485511|ref|NC_006088.3|GGA1	76.62	633	115	14	1	620	5381161	5381773	9e-122	441	1	S
SMAC_Scaffolded_contig_30981	gi|358485511|ref|NC_006088.3|GGA1	71.53	4637	1006	92	5479	9955	5386329	5390811	0	2280	19773	M
SMAC_Scaffolded_contig_151449	gi|358485511|ref|NC_006088.3|GGA1	89.33	75	8	0	392	466	5398992	5398918	3e-19	100	40648	M
SMAC_Scaffolded_contig_100101	gi|358485511|ref|NC_006088.3|GGA1	70.32	2116	434	50	2483	4521	5423283	5421285	0	935	6	S
SMAC_Scaffolded_contig_100100	gi|358485511|ref|NC_006088.3|GGA1	71.47	1539	314	36	238	1700	5426214	5427703	0	747	1	S
SMAC_Scaffolded_contig_54709	gi|358485511|ref|NC_006088.3|GGA1	79.11	3294	532	59	269	3495	5428361	5431565	0	2713	34	M
SMAC_Scaffolded_contig_162643	gi|358485511|ref|NC_006088.3|GGA1	72.8	2022	409	44	780	2765	5439642	5437726	0	1095	3	S
SMAC_Scaffolded_contig_60255	gi|358485511|ref|NC_006088.3|GGA1	72.57	3558	696	78	190	3626	5443980	5440582	0	1918	1	S
SMAC_Scaffolded_contig_82801	gi|358485511|ref|NC_006088.3|GGA1	78.48	1352	238	13	2665	3990	5445947	5447271	0	1115	4	M
SMAC_Scaffolded_contig_57279	gi|358485511|ref|NC_006088.3|GGA1	74.04	3872	678	84	3955	7642	5450582	5454310	0	2369	7	S
SMAC_Scaffolded_contig_78029	gi|358485511|ref|NC_006088.3|GGA1	76.97	5163	892	87	1629	6619	5465474	5470511	0	3826	9	M
SMAC_Scaffolded_contig_168075	gi|358485511|ref|NC_006088.3|GGA1	78.63	1006	139	26	1	950	5471963	5470978	0	796	2	S
SMAC_Scaffolded_contig_75012	gi|358485511|ref|NC_006088.3|GGA1	65.88	2767	623	96	1193	3802	5481042	5478440	5e-166	590	2	S
SMAC_Scaffolded_contig_75011	gi|358485511|ref|NC_006088.3|GGA1	78.56	2043	351	26	1242	3234	5483854	5485859	0	1671	3	S
SMAC_Scaffolded_contig_103624	gi|358485511|ref|NC_006088.3|GGA1	66.25	483	121	17	43	518	5487931	5487484	3e-18	98	155	M
SMAC_Scaffolded_contig_103625	gi|358485511|ref|NC_006088.3|GGA1	70.11	1760	356	48	25	1701	5487982	5489654	0	740	1	S
SMAC_Scaffolded_contig_133653	gi|358485511|ref|NC_006088.3|GGA1	74.87	788	139	16	1125	1872	5490318	5491086	7e-142	509	12	M
SMAC_Scaffolded_contig_68075	gi|358485511|ref|NC_006088.3|GGA1	84.56	732	71	13	549	1253	5493071	5493787	0	791	6	S
SMAC_Scaffolded_contig_103686	gi|358485511|ref|NC_006088.3|GGA1	74.82	425	67	10	139	535	5494225	5494637	7e-72	275	1	S
SMAC_Scaffolded_contig_130878	gi|358485511|ref|NC_006088.3|GGA1	79.18	586	82	8	5305	5865	5494971	5495541	9e-141	508	126	M
SMAC_Scaffolded_contig_28324	gi|358485511|ref|NC_006088.3|GGA1	71.39	1947	392	37	667	2568	5500428	5498602	0	982	3	S
SMAC_Scaffolded_contig_183037	gi|358485511|ref|NC_006088.3|GGA1	72.65	490	101	18	122	598	5502315	5502784	1e-57	228	1	S
SMAC_Scaffolded_contig_32776	gi|358485511|ref|NC_006088.3|GGA1	84.4	577	82	5	1227	1800	5509282	5508711	2e-174	619	4	S
SMAC_Scaffolded_contig_154725	gi|358485511|ref|NC_006088.3|GGA1	72.57	729	168	13	1416	2121	5514780	5514061	8e-104	383	1	S
SMAC_Scaffolded_contig_159731	gi|358485511|ref|NC_006088.3|GGA1	84.09	44	5	1	1041	1082	5523832	5523875	0.016	46	131	M
SMAC_Scaffolded_contig_170299	gi|358485511|ref|NC_006088.3|GGA1	71.25	473	115	6	40	502	5524069	5524530	7e-59	232	1	S
SMAC_Scaffolded_contig_166639	gi|358485511|ref|NC_006088.3|GGA1	79.62	1197	189	19	1	1180	5529317	5530475	0	1023	1	S
SMAC_Scaffolded_contig_34052	gi|358485511|ref|NC_006088.3|GGA1	73.29	3339	612	55	7075	10376	5540708	5537613	0	2004	11952	M
SMAC_Scaffolded_contig_186091	gi|358485511|ref|NC_006088.3|GGA1	81.28	1458	226	20	1	1440	5548111	5546683	0	1352	1	S
SMAC_Scaffolded_contig_133046	gi|358485511|ref|NC_006088.3|GGA1	72.74	1361	285	27	297	1617	5551279	5549965	0	738	3	S
SMAC_Scaffolded_contig_61914	gi|358485511|ref|NC_006088.3|GGA1	76.26	3037	518	52	5466	8380	5556826	5559781	0	2176	14	S
SMAC_Scaffolded_contig_185249	gi|358485511|ref|NC_006088.3|GGA1	83.46	526	77	3	23	540	5561942	5561419	2e-155	553	1	S
SMAC_Scaffolded_contig_1919	gi|358485511|ref|NC_006088.3|GGA1	77.8	3050	518	39	21	3030	5578622	5575692	0	2415	3	S
SMAC_Scaffolded_contig_1920	gi|358485511|ref|NC_006088.3|GGA1	80.52	2649	407	40	1014	3599	5580461	5583063	0	2369	11044	M
SMAC_Scaffolded_contig_12501	gi|358485511|ref|NC_006088.3|GGA1	79.21	7128	1061	114	8858	15739	5594142	5587190	0	6038	6690	M
SMAC_Scaffolded_contig_48540	gi|358485511|ref|NC_006088.3|GGA1	77.5	2898	468	48	20043	22876	5603533	5600756	0	2237	15	M
SMAC_Scaffolded_contig_2246	gi|358485511|ref|NC_006088.3|GGA1	75.31	3678	629	75	87	3627	5622567	5626102	0	2453	10243	M
SMAC_Scaffolded_contig_147926	gi|358485511|ref|NC_006088.3|GGA1	72.11	771	145	12	12	763	5630512	5631231	3e-118	430	1	S
SMAC_Scaffolded_contig_159992	gi|358485511|ref|NC_006088.3|GGA1	96.15	26	1	0	250	275	5632996	5632971	0.15	42	62	M
SMAC_Scaffolded_contig_413	gi|358485511|ref|NC_006088.3|GGA1	71.13	5587	1078	122	3487	8781	5645953	5640610	0	2736	1085	M
SMAC_Scaffolded_contig_59427	gi|358485511|ref|NC_006088.3|GGA1	77.19	1026	177	14	1451	2457	5649291	5650278	0	783	9890	M
SMAC_Scaffolded_contig_7135	gi|358485511|ref|NC_006088.3|GGA1	71.65	1506	317	28	1321	2754	5652780	5651313	0	764	2	S
SMAC_Scaffolded_contig_34468	gi|358485511|ref|NC_006088.3|GGA1	70.82	802	175	18	1901	2671	5656858	5656085	1e-97	363	73	M
SMAC_Scaffolded_contig_80143	gi|358485511|ref|NC_006088.3|GGA1	74.24	1145	227	20	65	1186	5657373	5658472	0	706	23	M
SMAC_Scaffolded_contig_107094	gi|358485511|ref|NC_006088.3|GGA1	75.97	233	44	4	309	536	5659531	5659306	1e-37	161	1	S
SMAC_Scaffolded_contig_107093	gi|358485511|ref|NC_006088.3|GGA1	76.89	2432	373	51	22	2367	5659808	5662136	0	1793	426	M
SMAC_Scaffolded_contig_80304	gi|358485511|ref|NC_006088.3|GGA1	71.82	997	207	23	200	1158	5668156	5667196	1e-137	495	201	M
SMAC_Scaffolded_contig_65078	gi|358485511|ref|NC_006088.3|GGA1	75.89	4409	774	92	3393	7662	5676388	5672130	0	3005	26302	M
SMAC_Scaffolded_contig_95790	gi|358485511|ref|NC_006088.3|GGA1	79.56	3957	624	66	3211	7089	5685188	5681339	0	3359	4	S
SMAC_Scaffolded_contig_107109	gi|358485511|ref|NC_006088.3|GGA1	79.08	2065	368	28	3516	5549	5691942	5693973	0	1709	621	M
SMAC_Scaffolded_contig_176050	gi|358485511|ref|NC_006088.3|GGA1	73.14	741	145	17	267	987	5694494	5695200	7e-113	412	1	S
SMAC_Scaffolded_contig_157976	gi|358485511|ref|NC_006088.3|GGA1	77.22	1396	209	19	49	1374	5697192	5695836	0	1097	1	S
SMAC_Scaffolded_contig_67217	gi|358485511|ref|NC_006088.3|GGA1	74.02	5778	1128	96	110	5684	5697329	5702936	0	3557	1	S
SMAC_Scaffolded_contig_143040	gi|358485511|ref|NC_006088.3|GGA1	79.49	195	33	3	90	277	5704505	5704311	2e-38	165	2	S
SMAC_Scaffolded_contig_36912	gi|358485511|ref|NC_006088.3|GGA1	76.1	2812	493	50	90	2842	5707771	5705080	0	1977	1	S
SMAC_Scaffolded_contig_19420	gi|358485511|ref|NC_006088.3|GGA1	77.13	2261	391	39	29	2208	5719781	5721996	0	1685	1	S
SMAC_Scaffolded_contig_162379	gi|358485511|ref|NC_006088.3|GGA1	79.37	126	25	1	471	596	5738254	5738378	2e-21	107	1	S
SMAC_Scaffolded_contig_153918	gi|358485511|ref|NC_006088.3|GGA1	86.49	37	5	0	1	37	5738351	5738315	0.037	44	71	M
SMAC_Scaffolded_contig_169582	gi|358485511|ref|NC_006088.3|GGA1	80.54	149	23	5	163	308	5738438	5738293	1e-25	122	39	M
SMAC_Scaffolded_contig_13978	gi|358485511|ref|NC_006088.3|GGA1	81.89	3103	436	41	35455	38496	5738442	5741479	0	2991	2230	M
SMAC_Scaffolded_contig_174152	gi|358485511|ref|NC_006088.3|GGA1	81.82	55	9	1	449	502	5756881	5756827	0.0002	51	85	M
SMAC_Scaffolded_contig_37566	gi|358485511|ref|NC_006088.3|GGA1	77.89	5763	961	92	10337	15949	5757049	5762648	0	4516	21416	M
SMAC_Scaffolded_contig_152940	gi|358485511|ref|NC_006088.3|GGA1	78.13	965	148	15	820	1737	5768244	5769192	0	778	2	S
SMAC_Scaffolded_contig_160850	gi|358485511|ref|NC_006088.3|GGA1	85.24	1592	195	16	11	1590	5771149	5769586	0	1775	1	S
SMAC_Scaffolded_contig_186216	gi|358485511|ref|NC_006088.3|GGA1	89.74	39	3	1	309	346	5783171	5783133	0.0006	50	104	M
SMAC_Scaffolded_contig_103233	gi|358485511|ref|NC_006088.3|GGA1	75.95	1002	150	19	1	963	5783429	5784378	0	717	1	S
SMAC_Scaffolded_contig_103234	gi|358485511|ref|NC_006088.3|GGA1	77.86	8445	1260	138	15	8079	5785755	5777541	0	6727	4	M
SMAC_Scaffolded_contig_132301	gi|358485511|ref|NC_006088.3|GGA1	76.85	3075	494	57	1	3006	5788882	5785957	0	2275	1	S
SMAC_Scaffolded_contig_158368	gi|358485511|ref|NC_006088.3|GGA1	92.66	572	22	3	2	569	5789416	5788861	0	847	1	S
SMAC_Scaffolded_contig_134997	gi|358485511|ref|NC_006088.3|GGA1	81.1	6533	873	95	14	6370	5796305	5789959	0	6112	1	S
SMAC_Scaffolded_contig_146250	gi|358485511|ref|NC_006088.3|GGA1	80.3	533	89	8	94	617	5804204	5803679	2e-129	466	10	M
SMAC_Scaffolded_contig_65038	gi|358485511|ref|NC_006088.3|GGA1	77.02	5052	831	86	4751	9625	5804204	5799306	0	3786	1576	M
SMAC_Scaffolded_contig_152507	gi|358485511|ref|NC_006088.3|GGA1	83.78	629	91	5	428	1052	5809825	5809204	0	663	3	S
SMAC_Scaffolded_contig_48755	gi|358485511|ref|NC_006088.3|GGA1	83.96	187	25	2	11	192	5810821	5811007	4e-48	197	2	S
SMAC_Scaffolded_contig_96866	gi|358485511|ref|NC_006088.3|GGA1	84.09	44	6	1	437	480	5813758	5813800	0.021	44	23	M
SMAC_Scaffolded_contig_87056	gi|358485511|ref|NC_006088.3|GGA1	76.38	1452	278	19	2944	4362	5814013	5812594	0	1045	16	M
SMAC_Scaffolded_contig_2959	gi|358485511|ref|NC_006088.3|GGA1	74.75	4316	805	87	4074	8221	5819665	5823863	0	2735	5	S
SMAC_Scaffolded_contig_50418	gi|358485511|ref|NC_006088.3|GGA1	72.41	87	20	1	2	88	5824441	5824359	0.002	48	38	M
SMAC_Scaffolded_contig_50419	gi|358485511|ref|NC_006088.3|GGA1	76.51	3188	516	56	3112	6217	5827996	5831032	0	2331	3	S
SMAC_Scaffolded_contig_164079	gi|358485511|ref|NC_006088.3|GGA1	82.19	556	89	4	648	1194	5833851	5834405	2e-153	547	2	S
SMAC_Scaffolded_contig_4588	gi|358485511|ref|NC_006088.3|GGA1	78.56	2411	361	41	8	2337	5834406	5836741	0	1974	6	M
SMAC_Scaffolded_contig_178352	gi|358485511|ref|NC_006088.3|GGA1	79.09	703	104	16	3	672	5836049	5836741	3e-161	572	1	S
SMAC_Scaffolded_contig_144270	gi|358485511|ref|NC_006088.3|GGA1	90.93	816	37	6	9	821	5840497	5839716	0	1144	2	M
SMAC_Scaffolded_contig_183285	gi|358485511|ref|NC_006088.3|GGA1	81.79	840	64	13	6	815	5844101	5844881	0	847	1	S
SMAC_Scaffolded_contig_133712	gi|358485511|ref|NC_006088.3|GGA1	83.33	48	7	1	423	470	5846963	5847009	0.002	48	18	M
SMAC_Scaffolded_contig_10743	gi|358485511|ref|NC_006088.3|GGA1	81.39	1865	181	36	27314	29097	5847103	5845324	0	1786	2076	M
SMAC_Scaffolded_contig_9666	gi|358485511|ref|NC_006088.3|GGA1	74.63	2594	467	59	5087	7635	5864451	5862004	0	1618	1522	M
SMAC_Scaffolded_contig_17080	gi|358485511|ref|NC_006088.3|GGA1	75.83	302	60	3	23	314	5869689	5869987	2e-52	214	3	S
SMAC_Scaffolded_contig_94566	gi|358485511|ref|NC_006088.3|GGA1	80.95	105	15	2	228	327	5878957	5879061	4e-17	95	17393	M
SMAC_Scaffolded_contig_16720	gi|358485511|ref|NC_006088.3|GGA1	75.43	1970	376	38	7631	9545	5879124	5881040	0	1297	20359	M
SMAC_Scaffolded_contig_73781	gi|358485511|ref|NC_006088.3|GGA1	79.36	625	115	8	3229	3849	5888350	5887736	2e-145	522	36	M
SMAC_Scaffolded_contig_119590	gi|358485511|ref|NC_006088.3|GGA1	71.23	723	169	15	197	889	5890413	5891126	2e-89	334	1	S
SMAC_Scaffolded_contig_49423	gi|358485511|ref|NC_006088.3|GGA1	74.54	601	100	14	15	591	5892681	5892110	4e-103	379	1	S
SMAC_Scaffolded_contig_145612	gi|358485511|ref|NC_006088.3|GGA1	77.97	118	21	3	754	870	5892909	5892796	3e-15	87	2520	M
SMAC_Scaffolded_contig_49422	gi|358485511|ref|NC_006088.3|GGA1	73.25	2718	471	67	558	3134	5897400	5900002	0	1553	3	S
SMAC_Scaffolded_contig_31192	gi|358485511|ref|NC_006088.3|GGA1	79.28	4913	763	83	1	4795	5900591	5905366	0	4127	1105	M
SMAC_Scaffolded_contig_159616	gi|358485511|ref|NC_006088.3|GGA1	87.52	561	45	11	12	556	5900890	5900339	0	670	2	S
SMAC_Scaffolded_contig_187335	gi|358485511|ref|NC_006088.3|GGA1	81.48	81	13	1	428	506	5908957	5909037	3e-12	77	914	M
SMAC_Scaffolded_contig_90975	gi|358485511|ref|NC_006088.3|GGA1	82.37	346	54	2	2197	2541	5916206	5915867	1e-92	347	7	M
SMAC_Scaffolded_contig_36045	gi|358485511|ref|NC_006088.3|GGA1	69.8	1636	329	44	125	1670	5918888	5917328	0	673	14018	M
SMAC_Scaffolded_contig_105342	gi|358485511|ref|NC_006088.3|GGA1	68.61	2192	450	53	1029	3163	5919868	5921878	0	827	13199	M
SMAC_Scaffolded_contig_39768	gi|358485511|ref|NC_006088.3|GGA1	69.5	2026	372	56	940	2883	5931542	5929681	0	838	125	M
SMAC_Scaffolded_contig_25538	gi|358485511|ref|NC_006088.3|GGA1	68.37	2371	559	59	1056	3290	5938197	5935882	0	801	4	S
SMAC_Scaffolded_contig_96780	gi|358485511|ref|NC_006088.3|GGA1	72.39	786	163	20	150	912	5943125	5942371	9e-108	398	3303	M
SMAC_Scaffolded_contig_16464	gi|358485511|ref|NC_006088.3|GGA1	71.48	915	201	19	7541	8421	5944190	5943302	4e-121	443	33	M
SMAC_Scaffolded_contig_109295	gi|358485511|ref|NC_006088.3|GGA1	67.41	810	174	28	14	764	5951020	5951798	1e-56	226	2	S
SMAC_Scaffolded_contig_155231	gi|358485511|ref|NC_006088.3|GGA1	72.93	410	85	9	370	763	5953734	5954133	4e-58	230	2	S
SMAC_Scaffolded_contig_35144	gi|358485511|ref|NC_006088.3|GGA1	70.1	1542	353	29	1276	2743	5954285	5955792	0	670	19	M
SMAC_Scaffolded_contig_31482	gi|358485511|ref|NC_006088.3|GGA1	68.94	5052	1114	140	12005	16837	5965588	5960773	0	1817	1042	M
SMAC_Scaffolded_contig_102176	gi|358485511|ref|NC_006088.3|GGA1	73.84	581	123	13	887	1463	5979537	5978982	7e-88	331	3	S
SMAC_Scaffolded_contig_171982	gi|358485511|ref|NC_006088.3|GGA1	74.13	433	79	12	332	737	5983529	5983955	1e-64	251	1	S
SMAC_Scaffolded_contig_80312	gi|358485511|ref|NC_006088.3|GGA1	72.02	4624	915	100	4664	9056	5990067	5985592	0	2396	3776	M
SMAC_Scaffolded_contig_132222	gi|358485511|ref|NC_006088.3|GGA1	84.43	244	31	5	229	467	5996178	5995937	4e-65	253	1	S
SMAC_Scaffolded_contig_100102	gi|358485511|ref|NC_006088.3|GGA1	86.67	165	19	3	342	505	5997223	5997385	7e-46	188	1	S
SMAC_Scaffolded_contig_31254	gi|358485511|ref|NC_006088.3|GGA1	73.76	2191	415	48	4641	6772	6021394	6019305	0	1287	789	M
SMAC_Scaffolded_contig_110480	gi|358485511|ref|NC_006088.3|GGA1	76.67	703	121	9	6	707	6022039	6021379	9e-148	527	1	S
SMAC_Scaffolded_contig_66927	gi|358485511|ref|NC_006088.3|GGA1	74.43	442	88	9	141	570	6028499	6028071	2e-69	269	57	M
SMAC_Scaffolded_contig_85733	gi|358485511|ref|NC_006088.3|GGA1	73.04	816	168	22	155	927	6028562	6029368	3e-117	428	14	M
SMAC_Scaffolded_contig_4541	gi|358485511|ref|NC_006088.3|GGA1	72.98	359	83	4	1263	1611	6030253	6029899	7e-50	205	1	S
SMAC_Scaffolded_contig_4542	gi|358485511|ref|NC_006088.3|GGA1	68.31	890	187	26	1824	2671	6031863	6032699	3e-79	302	495	M
SMAC_Scaffolded_contig_92690	gi|358485511|ref|NC_006088.3|GGA1	89.02	264	26	1	1515	1775	6033923	6034186	6e-92	343	14	M
SMAC_Scaffolded_contig_133853	gi|358485511|ref|NC_006088.3|GGA1	77.37	327	57	5	49	361	6034202	6033879	3e-64	250	1	S
SMAC_Scaffolded_contig_73101	gi|358485511|ref|NC_006088.3|GGA1	80.57	700	114	10	1168	1857	6034951	6035638	3e-176	625	16	M
SMAC_Scaffolded_contig_22659	gi|358485511|ref|NC_006088.3|GGA1	71.78	925	207	19	814	1729	6037859	6038738	2e-125	455	4427	M
SMAC_Scaffolded_contig_69573	gi|358485511|ref|NC_006088.3|GGA1	71.26	2523	505	52	278	2632	6042504	6040034	0	1245	1	S
SMAC_Scaffolded_contig_69574	gi|358485511|ref|NC_006088.3|GGA1	68.86	639	133	15	225	818	6042520	6043137	3e-63	248	8	M
SMAC_Scaffolded_contig_177460	gi|358485511|ref|NC_006088.3|GGA1	87.18	39	4	1	243	281	6046781	6046818	0.02	44	29	M
SMAC_Scaffolded_contig_29000	gi|358485511|ref|NC_006088.3|GGA1	71.43	4099	798	97	11	3891	6048784	6044841	0	2012	15354	M
SMAC_Scaffolded_contig_114983	gi|358485511|ref|NC_006088.3|GGA1	66.67	1230	246	28	3	1163	6048983	6050117	2e-106	392	59	M
SMAC_Scaffolded_contig_51013	gi|358485511|ref|NC_006088.3|GGA1	75.66	1134	201	21	2520	3623	6050787	6051875	0	774	10950	M
SMAC_Scaffolded_contig_104266	gi|358485511|ref|NC_006088.3|GGA1	72.16	291	55	11	6	285	6061508	6061233	5e-29	134	1	S
SMAC_Scaffolded_contig_111382	gi|358485511|ref|NC_006088.3|GGA1	84.78	92	11	2	31	119	6071553	6071644	2e-17	96	16230	M
SMAC_Scaffolded_contig_53454	gi|358485511|ref|NC_006088.3|GGA1	73.84	4174	739	92	21712	25725	6074199	6078179	0	2507	17	M
SMAC_Scaffolded_contig_13634	gi|358485511|ref|NC_006088.3|GGA1	73.17	2065	376	58	13421	15422	6092257	6090308	0	1126	21733	M
SMAC_Scaffolded_contig_39380	gi|358485511|ref|NC_006088.3|GGA1	68.18	729	163	24	2	677	6103782	6103070	5e-56	223	1	S
SMAC_Scaffolded_contig_99373	gi|358485511|ref|NC_006088.3|GGA1	69.57	3960	829	107	999	4774	6105997	6109764	0	1566	84	M
SMAC_Scaffolded_contig_103858	gi|358485511|ref|NC_006088.3|GGA1	76.24	505	86	8	3	482	6115754	6115259	2e-98	365	2	S
SMAC_Scaffolded_contig_40326	gi|358485511|ref|NC_006088.3|GGA1	70.27	2015	377	56	6750	8585	6130484	6132455	0	881	7	S
SMAC_Scaffolded_contig_64487	gi|358485511|ref|NC_006088.3|GGA1	75.44	1079	164	19	5712	6742	6133457	6132432	0	758	2	S
SMAC_Scaffolded_contig_155795	gi|358485511|ref|NC_006088.3|GGA1	85.44	364	51	1	1	362	6134009	6134372	5e-114	416	1	S
SMAC_Scaffolded_contig_3816	gi|358485511|ref|NC_006088.3|GGA1	76.85	2294	387	45	23485	25716	6149451	6147240	0	1671	22161	M
SMAC_Scaffolded_contig_64730	gi|358485511|ref|NC_006088.3|GGA1	83.02	483	61	9	388	852	6181201	6180722	5e-133	480	6	M
SMAC_Scaffolded_contig_50444	gi|358485511|ref|NC_006088.3|GGA1	78.63	1212	185	21	182	1356	6181896	6183070	0	991	2	M
SMAC_Scaffolded_contig_98417	gi|358485511|ref|NC_006088.3|GGA1	69.12	2108	430	70	7843	9850	6185604	6183618	0	751	5904	M
SMAC_Scaffolded_contig_165476	gi|358485511|ref|NC_006088.3|GGA1	70.33	519	124	12	22	540	6187898	6187410	5e-54	215	2	M
SMAC_Scaffolded_contig_52569	gi|358485511|ref|NC_006088.3|GGA1	76.88	558	87	11	1178	1722	6191512	6190984	8e-113	414	3	S
SMAC_Scaffolded_contig_155406	gi|358485511|ref|NC_006088.3|GGA1	68.75	784	148	22	460	1174	6198976	6198221	1e-78	298	3	M
SMAC_Scaffolded_contig_82193	gi|358485511|ref|NC_006088.3|GGA1	79.07	535	84	11	2717	3232	6201153	6200628	8e-119	435	34838	M
SMAC_Scaffolded_contig_148824	gi|358485511|ref|NC_006088.3|GGA1	71.77	418	83	12	127	523	6202995	6202592	4e-49	199	2	M
SMAC_Scaffolded_contig_123941	gi|358485511|ref|NC_006088.3|GGA1	72.82	942	179	25	267	1173	6206666	6207565	1e-139	502	5	M
SMAC_Scaffolded_contig_87437	gi|358485511|ref|NC_006088.3|GGA1	70.28	323	65	12	22	330	6208485	6208180	3e-26	123	2	M
SMAC_Scaffolded_contig_4604	gi|358485511|ref|NC_006088.3|GGA1	69.33	6629	1328	188	7716	14062	6230133	6223928	0	2578	7745	M
SMAC_Scaffolded_contig_30194	gi|358485511|ref|NC_006088.3|GGA1	65.75	2026	460	60	8184	10102	6240857	6238959	5e-128	466	160	M
SMAC_Scaffolded_contig_45395	gi|358485511|ref|NC_006088.3|GGA1	68.85	703	155	22	81	759	6247691	6248353	7e-61	239	1	S
SMAC_Scaffolded_contig_31784	gi|358485511|ref|NC_006088.3|GGA1	72.22	828	160	20	351	1169	6249508	6250274	6e-118	430	5153	M
SMAC_Scaffolded_contig_97217	gi|358485511|ref|NC_006088.3|GGA1	79.37	63	8	3	374	432	6256722	6256661	0.007	46	46	M
SMAC_Scaffolded_contig_123531	gi|358485511|ref|NC_006088.3|GGA1	72.52	404	104	4	293	696	6258242	6258638	3e-54	217	1	S
SMAC_Scaffolded_contig_175398	gi|358485511|ref|NC_006088.3|GGA1	73.76	362	71	6	308	656	6262873	6262523	8e-55	219	1	S
SMAC_Scaffolded_contig_144387	gi|358485511|ref|NC_006088.3|GGA1	77.71	166	30	2	655	813	6280113	6279948	3e-28	131	1	S
SMAC_Scaffolded_contig_16222	gi|358485511|ref|NC_006088.3|GGA1	70.53	302	59	4	35	332	6288468	6288193	6e-35	152	2	S
SMAC_Scaffolded_contig_16223	gi|358485511|ref|NC_006088.3|GGA1	71.87	3790	731	80	40752	44377	6321103	6324721	0	1970	4595	M
SMAC_Scaffolded_contig_99188	gi|358485511|ref|NC_006088.3|GGA1	76.25	939	164	18	20	921	6357155	6358071	0	661	2	S
SMAC_Scaffolded_contig_101826	gi|358485511|ref|NC_006088.3|GGA1	94.44	72	3	1	1074	1144	6358250	6358179	1e-21	109	1	S
SMAC_Scaffolded_contig_180862	gi|358485511|ref|NC_006088.3|GGA1	72.96	503	83	7	6	505	6362934	6363386	9e-83	311	1	S
SMAC_Scaffolded_contig_14371	gi|358485511|ref|NC_006088.3|GGA1	74.68	4198	811	77	21484	25563	6369451	6373514	0	2659	23	S
SMAC_Scaffolded_contig_122489	gi|358485511|ref|NC_006088.3|GGA1	77.19	1232	224	16	479	1681	6380980	6382183	0	935	4	S
SMAC_Scaffolded_contig_177578	gi|358485511|ref|NC_006088.3|GGA1	96.3	27	1	0	1	27	6399217	6399243	0.021	44	405	M
SMAC_Scaffolded_contig_113055	gi|358485511|ref|NC_006088.3|GGA1	71.82	479	83	12	2097	2555	6401704	6402150	5e-63	248	2	S
SMAC_Scaffolded_contig_22101	gi|358485511|ref|NC_006088.3|GGA1	81.28	1202	201	13	27	1216	6409335	6408146	0	1117	5413	M
SMAC_Scaffolded_contig_161688	gi|358485511|ref|NC_006088.3|GGA1	75.74	305	69	3	5	309	6410499	6410200	1e-51	208	2	S
SMAC_Scaffolded_contig_95545	gi|358485511|ref|NC_006088.3|GGA1	67.76	1064	245	23	264	1268	6412688	6413712	6e-96	358	4	S
SMAC_Scaffolded_contig_125234	gi|358485511|ref|NC_006088.3|GGA1	78.25	639	122	8	1	631	6425338	6424709	9e-141	506	1936	M
SMAC_Scaffolded_contig_63729	gi|358485511|ref|NC_006088.3|GGA1	73.4	1846	351	46	12125	13906	6427112	6428881	0	1034	2196	M
SMAC_Scaffolded_contig_120833	gi|358485511|ref|NC_006088.3|GGA1	79.18	269	47	2	1140	1399	6435125	6435393	3e-58	232	20744	M
SMAC_Scaffolded_contig_135685	gi|358485511|ref|NC_006088.3|GGA1	68.61	274	63	6	1	257	6435125	6435392	5e-22	111	17961	M
SMAC_Scaffolded_contig_66176	gi|358485511|ref|NC_006088.3|GGA1	85.28	163	23	1	495	657	6435232	6435393	5e-44	183	3822	M
SMAC_Scaffolded_contig_47009	gi|358485511|ref|NC_006088.3|GGA1	80.25	157	30	1	5007	5162	6435239	6435395	5e-30	140	228	M
SMAC_Scaffolded_contig_98141	gi|358485511|ref|NC_006088.3|GGA1	80.13	151	19	1	509	648	6435239	6435389	8e-32	143	444	M
SMAC_Scaffolded_contig_109782	gi|358485511|ref|NC_006088.3|GGA1	79.56	137	27	1	441	576	6435253	6435389	1e-23	118	11	M
SMAC_Scaffolded_contig_9968	gi|358485511|ref|NC_006088.3|GGA1	87.14	70	9	0	31	100	6435309	6435240	2e-14	86	19319	M
SMAC_Scaffolded_contig_39973	gi|358485511|ref|NC_006088.3|GGA1	87.78	90	11	0	1	90	6435325	6435236	5e-23	113	11	M
SMAC_Scaffolded_contig_179377	gi|358485511|ref|NC_006088.3|GGA1	93.75	32	1	1	1	32	6435371	6435401	0.007	46	352	M
SMAC_Scaffolded_contig_165087	gi|358485511|ref|NC_006088.3|GGA1	84.28	159	22	3	160	316	6435386	6435229	8e-38	163	2004	M
SMAC_Scaffolded_contig_77865	gi|358485511|ref|NC_006088.3|GGA1	80.79	151	28	1	604	753	6435387	6435237	2e-30	138	185	M
SMAC_Scaffolded_contig_124099	gi|358485511|ref|NC_006088.3|GGA1	85	40	5	1	1000	1039	6448430	6448392	0.14	42	65	M
SMAC_Scaffolded_contig_60100	gi|358485511|ref|NC_006088.3|GGA1	73.44	640	108	15	104	719	6454952	6454351	5e-102	376	2	M
SMAC_Scaffolded_contig_24988	gi|358485511|ref|NC_006088.3|GGA1	71.46	4509	896	106	30400	34796	6462402	6466631	0	2205	26716	M
SMAC_Scaffolded_contig_103133	gi|358485511|ref|NC_006088.3|GGA1	69.26	1656	366	30	1	1635	6463935	6462402	0	686	2	S
SMAC_Scaffolded_contig_21129	gi|358485511|ref|NC_006088.3|GGA1	76.85	298	52	7	514	805	6472225	6472511	5e-52	210	6	M
SMAC_Scaffolded_contig_49731	gi|358485511|ref|NC_006088.3|GGA1	74.62	1576	302	37	282	1836	6475498	6474000	0	960	841	M
SMAC_Scaffolded_contig_43227	gi|358485511|ref|NC_006088.3|GGA1	75.39	2788	508	53	1339	4025	6478402	6475692	0	1856	3	S
SMAC_Scaffolded_contig_16166	gi|358485511|ref|NC_006088.3|GGA1	74.34	1469	279	29	4864	6261	6483287	6481846	0	908	4	M
SMAC_Scaffolded_contig_87792	gi|358485511|ref|NC_006088.3|GGA1	69.43	157	31	2	349	505	6484826	6484965	4e-11	73	12	M
SMAC_Scaffolded_contig_19836	gi|358485511|ref|NC_006088.3|GGA1	74.15	998	176	17	7720	8706	6485930	6485004	1e-178	634	8231	M
SMAC_Scaffolded_contig_9725	gi|358485511|ref|NC_006088.3|GGA1	72.33	553	122	16	422	965	6490128	6489598	3e-68	264	1301	M
SMAC_Scaffolded_contig_9724	gi|358485511|ref|NC_006088.3|GGA1	73.45	113	20	5	154	260	6491038	6491146	1e-05	55	22	M
SMAC_Scaffolded_contig_34823	gi|358485511|ref|NC_006088.3|GGA1	74.65	3227	589	59	4211	7270	6496110	6492946	0	2073	4	S
SMAC_Scaffolded_contig_94647	gi|358485511|ref|NC_006088.3|GGA1	71.52	797	165	13	359	1125	6498842	6498078	1e-112	412	3	S
SMAC_Scaffolded_contig_34824	gi|358485511|ref|NC_006088.3|GGA1	72.03	1155	218	29	3	1079	6501200	6502327	2e-166	590	2	S
SMAC_Scaffolded_contig_53993	gi|358485511|ref|NC_006088.3|GGA1	72.76	2390	468	44	7583	9838	6512433	6514773	0	1344	20335	M
SMAC_Scaffolded_contig_7839	gi|358485511|ref|NC_006088.3|GGA1	69.43	1956	382	53	10765	12642	6521803	6519986	0	787	17	M
SMAC_Scaffolded_contig_7838	gi|358485511|ref|NC_006088.3|GGA1	72.46	1583	298	28	4354	5900	6536364	6537844	0	888	16934	M
SMAC_Scaffolded_contig_143982	gi|358485511|ref|NC_006088.3|GGA1	76.42	670	119	10	1	632	6545728	6545060	3e-135	486	1	S
SMAC_Scaffolded_contig_132540	gi|358485511|ref|NC_006088.3|GGA1	71.9	274	52	7	365	620	6552709	6552443	1e-30	138	26	M
SMAC_Scaffolded_contig_34232	gi|358485511|ref|NC_006088.3|GGA1	79.35	552	89	12	1186	1723	6553440	6552900	5e-124	450	93	M
SMAC_Scaffolded_contig_21994	gi|358485511|ref|NC_006088.3|GGA1	71.59	4009	770	85	16501	20386	6569975	6566213	0	2044	16	M
SMAC_Scaffolded_contig_123305	gi|358485511|ref|NC_006088.3|GGA1	86.96	69	8	1	380	448	6570893	6570960	4e-13	80	447	M
SMAC_Scaffolded_contig_160788	gi|358485511|ref|NC_006088.3|GGA1	79.45	506	85	7	55	543	6578424	6578927	3e-118	430	1	S
SMAC_Scaffolded_contig_30290	gi|358485511|ref|NC_006088.3|GGA1	73.99	2491	446	49	1856	4243	6585775	6583384	0	1532	5	M
SMAC_Scaffolded_contig_44235	gi|358485511|ref|NC_006088.3|GGA1	72.74	1937	369	43	3250	5132	6590863	6592694	0	1063	23744	M
SMAC_Scaffolded_contig_169625	gi|358485511|ref|NC_006088.3|GGA1	70.69	423	94	12	92	510	6609207	6608811	1e-42	178	1	S
SMAC_Scaffolded_contig_9504	gi|358485511|ref|NC_006088.3|GGA1	67.77	1843	393	56	480	2210	6610442	6612195	1e-160	574	45	M
SMAC_Scaffolded_contig_34466	gi|358485511|ref|NC_006088.3|GGA1	69.2	685	139	17	700	1314	6618986	6618304	1e-70	273	2	S
SMAC_Scaffolded_contig_47607	gi|358485511|ref|NC_006088.3|GGA1	76.67	3404	540	59	13651	16902	6637638	6634337	0	2522	5987	M
SMAC_Scaffolded_contig_37736	gi|358485511|ref|NC_006088.3|GGA1	79.08	239	46	4	3	239	6646710	6646946	2e-46	192	3748	M
SMAC_Scaffolded_contig_16981	gi|358485511|ref|NC_006088.3|GGA1	74.8	377	78	7	1756	2129	6652291	6651929	4e-59	235	2	S
SMAC_Scaffolded_contig_26706	gi|358485511|ref|NC_006088.3|GGA1	83.56	523	82	3	5707	6226	6655206	6654685	4e-152	545	5711	M
SMAC_Scaffolded_contig_8856	gi|358485511|ref|NC_006088.3|GGA1	71.14	246	44	8	17	242	6665627	6665389	5e-23	113	1	S
SMAC_Scaffolded_contig_8857	gi|358485511|ref|NC_006088.3|GGA1	71.48	2609	481	55	10733	13173	6670168	6672681	0	1341	771	M
SMAC_Scaffolded_contig_108302	gi|358485511|ref|NC_006088.3|GGA1	76.9	723	97	9	948	1610	6673407	6672695	2e-161	574	2	S
SMAC_Scaffolded_contig_92029	gi|358485511|ref|NC_006088.3|GGA1	74.66	292	61	4	781	1059	6675043	6674752	8e-45	187	4129	M
SMAC_Scaffolded_contig_173553	gi|358485511|ref|NC_006088.3|GGA1	66.36	428	85	13	108	523	6677948	6677568	4e-25	120	1	S
SMAC_Scaffolded_contig_118006	gi|358485511|ref|NC_006088.3|GGA1	76.39	898	162	20	194	1068	6679359	6678489	3e-175	619	1058	M
SMAC_Scaffolded_contig_171983	gi|358485511|ref|NC_006088.3|GGA1	69.06	404	83	13	306	695	6679775	6680150	1e-32	145	643	M
SMAC_Scaffolded_contig_96938	gi|358485511|ref|NC_006088.3|GGA1	75.98	2523	434	42	5980	8372	6681159	6683639	0	1784	2068	M
SMAC_Scaffolded_contig_43045	gi|358485511|ref|NC_006088.3|GGA1	81.33	2078	313	28	1380	3414	6695537	6693492	0	1939	8	S
SMAC_Scaffolded_contig_187829	gi|358485511|ref|NC_006088.3|GGA1	65.67	402	93	9	80	459	6699769	6699391	2e-23	114	1	S
SMAC_Scaffolded_contig_57101	gi|358485511|ref|NC_006088.3|GGA1	76.87	2668	408	43	7265	9869	6706304	6703783	0	2024	2400	M
SMAC_Scaffolded_contig_119877	gi|358485511|ref|NC_006088.3|GGA1	71.93	1115	210	26	540	1635	6706750	6707780	5e-162	576	2	S
SMAC_Scaffolded_contig_1089	gi|358485511|ref|NC_006088.3|GGA1	76.56	2073	379	36	4171	6178	6716079	6714049	0	1481	5	S
SMAC_Scaffolded_contig_49559	gi|358485511|ref|NC_006088.3|GGA1	70.47	4246	787	109	4941	9010	6721986	6725940	0	1934	1021	M
SMAC_Scaffolded_contig_83366	gi|358485511|ref|NC_006088.3|GGA1	76.61	1227	228	19	1191	2374	6732217	6731007	0	886	3	S
SMAC_Scaffolded_contig_125155	gi|358485511|ref|NC_006088.3|GGA1	74.24	1017	201	21	240	1223	6737835	6736847	4e-173	614	5	M
SMAC_Scaffolded_contig_86511	gi|358485511|ref|NC_006088.3|GGA1	73.52	1235	253	28	381	1596	6738017	6739196	0	693	76	M
SMAC_Scaffolded_contig_66633	gi|358485511|ref|NC_006088.3|GGA1	84.43	1355	144	24	1639	2953	6741255	6739928	0	1445	2	S
SMAC_Scaffolded_contig_12992	gi|358485511|ref|NC_006088.3|GGA1	71.13	4344	809	117	820	4832	6748163	6743934	0	2055	3	S
SMAC_Scaffolded_contig_112164	gi|358485511|ref|NC_006088.3|GGA1	88.06	603	43	5	395	991	6749259	6749838	0	767	2	S
SMAC_Scaffolded_contig_123221	gi|358485511|ref|NC_006088.3|GGA1	76.06	986	144	20	127	1095	6753377	6752467	0	708	1	S
SMAC_Scaffolded_contig_23233	gi|358485511|ref|NC_006088.3|GGA1	75.15	2929	540	61	5089	7916	6754105	6756946	0	1894	8	S
SMAC_Scaffolded_contig_82999	gi|358485511|ref|NC_006088.3|GGA1	71.86	3962	734	84	720	4470	6766426	6770217	0	2084	18891	M
SMAC_Scaffolded_contig_125654	gi|358485511|ref|NC_006088.3|GGA1	77.17	311	57	6	536	840	6778967	6779269	1e-56	226	9	M
SMAC_Scaffolded_contig_65091	gi|358485511|ref|NC_006088.3|GGA1	73.53	1258	234	23	1206	2448	6784343	6785516	0	753	3	M
SMAC_Scaffolded_contig_22210	gi|358485511|ref|NC_006088.3|GGA1	74.97	2289	390	48	150	2383	6786503	6784343	0	1494	6	M
SMAC_Scaffolded_contig_101242	gi|358485511|ref|NC_006088.3|GGA1	75.33	4304	776	77	4685	8816	6791308	6795497	0	2884	4744	M
SMAC_Scaffolded_contig_77194	gi|358485511|ref|NC_006088.3|GGA1	72.89	2173	439	41	420	2547	6798351	6796284	0	1214	2	S
SMAC_Scaffolded_contig_103226	gi|358485511|ref|NC_006088.3|GGA1	77.32	97	17	2	11	107	6799306	6799215	1e-09	71	3	M
SMAC_Scaffolded_contig_4518	gi|358485511|ref|NC_006088.3|GGA1	69.32	2546	486	65	529	2914	6802201	6799791	0	1043	308	M
SMAC_Scaffolded_contig_81322	gi|358485511|ref|NC_006088.3|GGA1	73.82	2017	383	38	22	1945	6802550	6804514	0	1216	3	S
SMAC_Scaffolded_contig_9586	gi|358485511|ref|NC_006088.3|GGA1	69.57	3470	711	77	221	3568	6808107	6811353	0	1462	1	S
SMAC_Scaffolded_contig_7597	gi|358485511|ref|NC_006088.3|GGA1	76.27	2946	553	43	14512	17379	6814276	6811399	0	2100	6997	M
SMAC_Scaffolded_contig_173792	gi|358485511|ref|NC_006088.3|GGA1	87.8	41	4	1	375	415	6814318	6814279	0.002	48	40	M
SMAC_Scaffolded_contig_110211	gi|358485511|ref|NC_006088.3|GGA1	76.01	1438	262	24	986	2384	6823355	6824748	0	1005	2	S
SMAC_Scaffolded_contig_103849	gi|358485511|ref|NC_006088.3|GGA1	84.02	1245	173	8	3578	4797	6830585	6831828	0	1335	3	S
SMAC_Scaffolded_contig_32340	gi|358485511|ref|NC_006088.3|GGA1	75.48	1937	372	24	605	2490	6834218	6832334	0	1337	1	S
SMAC_Scaffolded_contig_117682	gi|358485511|ref|NC_006088.3|GGA1	74.02	1501	276	26	383	1819	6837544	6836094	0	935	3	S
SMAC_Scaffolded_contig_95113	gi|358485511|ref|NC_006088.3|GGA1	72.44	791	145	17	2132	2885	6839488	6838734	7e-119	434	11885	M
SMAC_Scaffolded_contig_97910	gi|358485511|ref|NC_006088.3|GGA1	83.02	589	85	6	273	858	6841667	6841091	9e-169	598	1	S
SMAC_Scaffolded_contig_38895	gi|358485511|ref|NC_006088.3|GGA1	74.56	2441	450	44	423	2759	6848528	6846155	0	1559	11560	M
SMAC_Scaffolded_contig_68555	gi|358485511|ref|NC_006088.3|GGA1	81.39	1010	160	9	5229	6228	6853183	6852192	0	958	1069	M
SMAC_Scaffolded_contig_79711	gi|358485511|ref|NC_006088.3|GGA1	72.66	1123	230	18	1	1072	6858448	6857352	2e-178	630	1	S
SMAC_Scaffolded_contig_79177	gi|358485511|ref|NC_006088.3|GGA1	74.93	343	66	6	2288	2614	6859107	6858769	2e-55	223	2	S
SMAC_Scaffolded_contig_73891	gi|358485511|ref|NC_006088.3|GGA1	72.13	2917	586	64	1272	4078	6864348	6861549	0	1512	4481	M
SMAC_Scaffolded_contig_51036	gi|358485511|ref|NC_006088.3|GGA1	76.49	1144	208	20	2118	3229	6874442	6873328	0	816	1106	M
SMAC_Scaffolded_contig_38056	gi|358485511|ref|NC_006088.3|GGA1	77.66	573	98	11	331	900	6877721	6877176	1e-118	434	27	M
SMAC_Scaffolded_contig_25776	gi|358485511|ref|NC_006088.3|GGA1	76.85	1335	227	21	7523	8844	6884951	6886216	0	994	583	M
SMAC_Scaffolded_contig_26937	gi|358485511|ref|NC_006088.3|GGA1	75.74	3224	542	54	8992	12123	6917840	6920915	0	2262	5908	M
SMAC_Scaffolded_contig_82247	gi|358485511|ref|NC_006088.3|GGA1	67.89	1252	268	27	4147	5329	6940867	6939681	8e-122	444	7	M
SMAC_Scaffolded_contig_112788	gi|358485511|ref|NC_006088.3|GGA1	80.21	1400	205	21	1	1372	6943877	6942522	0	1247	2	S
SMAC_Scaffolded_contig_136130	gi|358485511|ref|NC_006088.3|GGA1	70.46	1503	303	37	1062	2511	6952960	6954374	0	670	2	S
SMAC_Scaffolded_contig_71077	gi|358485511|ref|NC_006088.3|GGA1	72.75	2400	508	38	719	3069	6960911	6958609	0	1341	17	M
SMAC_Scaffolded_contig_10319	gi|358485511|ref|NC_006088.3|GGA1	75.07	1500	290	23	1511	2980	6965917	6964472	0	991	266	M
SMAC_Scaffolded_contig_10318	gi|358485511|ref|NC_006088.3|GGA1	73.56	2458	508	44	1997	4408	6969613	6971974	0	1433	4294	M
SMAC_Scaffolded_contig_93584	gi|358485511|ref|NC_006088.3|GGA1	79.71	838	137	10	15	826	6984274	6983444	0	729	3	S
SMAC_Scaffolded_contig_67364	gi|358485511|ref|NC_006088.3|GGA1	77.75	908	168	12	2363	3252	6986020	6986911	0	704	3533	M
SMAC_Scaffolded_contig_75351	gi|358485511|ref|NC_006088.3|GGA1	72.78	1848	330	41	77	1865	6990280	6992013	0	1036	189	M
SMAC_Scaffolded_contig_135401	gi|358485511|ref|NC_006088.3|GGA1	72.21	1130	247	24	746	1837	6998677	6997577	3e-161	574	3	S
SMAC_Scaffolded_contig_177505	gi|358485511|ref|NC_006088.3|GGA1	75.37	272	53	2	2	270	7005155	7005415	1e-46	192	1	S
SMAC_Scaffolded_contig_84363	gi|358485511|ref|NC_006088.3|GGA1	77.8	1261	214	17	6	1239	7005182	7003961	0	994	3	S
SMAC_Scaffolded_contig_15240	gi|358485511|ref|NC_006088.3|GGA1	70.4	4658	1024	109	18063	22546	7019949	7015473	0	2012	22618	M
SMAC_Scaffolded_contig_133952	gi|358485511|ref|NC_006088.3|GGA1	85.37	41	6	0	148	188	7039322	7039282	0.003	48	94	M
SMAC_Scaffolded_contig_20013	gi|358485511|ref|NC_006088.3|GGA1	75.14	3801	700	68	11714	15434	7045286	7041651	0	2509	19	M
SMAC_Scaffolded_contig_60897	gi|358485511|ref|NC_006088.3|GGA1	85.71	63	8	1	425	486	7056722	7056660	8e-10	69	20284	M
SMAC_Scaffolded_contig_130226	gi|358485511|ref|NC_006088.3|GGA1	73.18	1555	298	34	370	1892	7058177	7056710	0	879	135	M
SMAC_Scaffolded_contig_101013	gi|358485511|ref|NC_006088.3|GGA1	71.23	803	189	16	588	1369	7059031	7058250	9e-101	372	2	S
SMAC_Scaffolded_contig_130227	gi|358485511|ref|NC_006088.3|GGA1	79.29	816	122	5	2	815	7059492	7060262	0	744	1	S
SMAC_Scaffolded_contig_10173	gi|358485511|ref|NC_006088.3|GGA1	72.48	1799	378	37	12030	13775	7073261	7071527	0	951	7038	M
SMAC_Scaffolded_contig_146626	gi|358485511|ref|NC_006088.3|GGA1	69	2139	481	48	100	2152	7089088	7087046	0	816	2	S
SMAC_Scaffolded_contig_2562	gi|358485511|ref|NC_006088.3|GGA1	68.02	3712	850	87	754	4374	7089922	7093387	0	1283	9768	M
SMAC_Scaffolded_contig_174701	gi|358485511|ref|NC_006088.3|GGA1	69.77	870	168	15	21	829	7104366	7105201	1e-109	401	10227	M
SMAC_Scaffolded_contig_78045	gi|358485511|ref|NC_006088.3|GGA1	84.38	128	20	0	1492	1619	7107136	7107263	2e-30	141	486	M
SMAC_Scaffolded_contig_110524	gi|358485511|ref|NC_006088.3|GGA1	83.67	49	7	1	578	626	7114087	7114134	0.0008	50	25	M
SMAC_Scaffolded_contig_147576	gi|358485511|ref|NC_006088.3|GGA1	70.84	1063	213	18	339	1342	7118351	7117327	9e-147	526	2	S
SMAC_Scaffolded_contig_181506	gi|358485511|ref|NC_006088.3|GGA1	72.94	425	102	6	183	605	7126165	7125752	2e-59	233	1	S
SMAC_Scaffolded_contig_170203	gi|358485511|ref|NC_006088.3|GGA1	77.27	330	61	8	192	515	7133717	7134038	2e-59	233	1	S
SMAC_Scaffolded_contig_12711	gi|358485511|ref|NC_006088.3|GGA1	72.46	2048	406	38	6827	8765	7135387	7137385	0	1122	1418	M
SMAC_Scaffolded_contig_152455	gi|358485511|ref|NC_006088.3|GGA1	66.96	684	158	21	300	934	7152949	7153613	2e-43	181	1	S
SMAC_Scaffolded_contig_148647	gi|358485511|ref|NC_006088.3|GGA1	76.54	324	57	8	1071	1391	7155889	7155582	2e-55	223	21	M
SMAC_Scaffolded_contig_99524	gi|358485511|ref|NC_006088.3|GGA1	76.13	444	58	9	129	529	7159122	7159560	5e-87	325	1	S
SMAC_Scaffolded_contig_73681	gi|358485511|ref|NC_006088.3|GGA1	77.65	3334	554	61	5091	8319	7160463	7163710	0	2551	7973	M
SMAC_Scaffolded_contig_46214	gi|358485511|ref|NC_006088.3|GGA1	76.18	1121	236	12	6141	7247	7173089	7174192	0	792	171	M
SMAC_Scaffolded_contig_150582	gi|358485511|ref|NC_006088.3|GGA1	84.62	39	6	0	655	693	7181882	7181844	0.027	44	42	M
SMAC_Scaffolded_contig_92212	gi|358485511|ref|NC_006088.3|GGA1	67.52	3076	713	76	1787	4717	7183573	7186507	0	958	1676	M
SMAC_Scaffolded_contig_143312	gi|358485511|ref|NC_006088.3|GGA1	68.52	610	126	15	245	798	7189351	7188752	7e-57	226	2	S
SMAC_Scaffolded_contig_80242	gi|358485511|ref|NC_006088.3|GGA1	72.04	837	177	25	2842	3638	7191175	7190356	7e-107	394	13684	M
SMAC_Scaffolded_contig_113408	gi|358485511|ref|NC_006088.3|GGA1	74.14	348	60	1	511	858	7194754	7195071	3e-63	248	1	S
SMAC_Scaffolded_contig_9924	gi|358485511|ref|NC_006088.3|GGA1	71.14	1833	370	41	5561	7321	7205021	7203276	0	879	11	S
SMAC_Scaffolded_contig_126796	gi|358485511|ref|NC_006088.3|GGA1	81.63	49	7	2	1924	1971	7205952	7205905	0.98	41	2	M
SMAC_Scaffolded_contig_104232	gi|358485511|ref|NC_006088.3|GGA1	73.08	208	38	4	73	273	7210057	7210253	1e-25	122	1	S
SMAC_Scaffolded_contig_59694	gi|358485511|ref|NC_006088.3|GGA1	73.88	1493	278	24	3730	5160	7215773	7214331	0	928	3	S
SMAC_Scaffolded_contig_25483	gi|358485511|ref|NC_006088.3|GGA1	71.93	4806	966	85	64	4753	7226432	7221894	0	2547	8	M
SMAC_Scaffolded_contig_52967	gi|358485511|ref|NC_006088.3|GGA1	68.23	4712	978	126	3558	8073	7233873	7229485	0	1649	82	M
SMAC_Scaffolded_contig_45810	gi|358485511|ref|NC_006088.3|GGA1	77.32	560	106	7	2	560	7236463	7237002	6e-116	425	36	M
SMAC_Scaffolded_contig_120566	gi|358485511|ref|NC_006088.3|GGA1	76.16	302	57	3	11	312	7236475	7236189	2e-55	221	1	S
SMAC_Scaffolded_contig_182352	gi|358485511|ref|NC_006088.3|GGA1	75.94	478	88	12	614	1074	7240029	7240496	2e-83	315	1	S
SMAC_Scaffolded_contig_112234	gi|358485511|ref|NC_006088.3|GGA1	68.2	1437	297	35	27	1401	7242924	7241586	1e-144	518	2	S
SMAC_Scaffolded_contig_72920	gi|358485511|ref|NC_006088.3|GGA1	77.29	251	53	2	3	249	7243615	7243365	2e-46	190	16	M
SMAC_Scaffolded_contig_72921	gi|358485511|ref|NC_006088.3|GGA1	75.3	421	86	4	2633	3044	7246656	7247067	2e-75	289	51	M
SMAC_Scaffolded_contig_7746	gi|358485511|ref|NC_006088.3|GGA1	75.03	721	112	18	3153	3835	7255996	7255306	9e-129	470	22238	M
SMAC_Scaffolded_contig_64665	gi|358485511|ref|NC_006088.3|GGA1	74.92	319	61	6	1087	1390	7260616	7260930	3e-50	205	2	M
SMAC_Scaffolded_contig_37783	gi|358485511|ref|NC_006088.3|GGA1	75.19	661	148	5	626	1281	7262633	7261984	2e-122	444	4	M
SMAC_Scaffolded_contig_37784	gi|358485511|ref|NC_006088.3|GGA1	71.09	678	147	14	1411	2079	7265818	7266455	1e-84	320	3	S
SMAC_Scaffolded_contig_66828	gi|358485511|ref|NC_006088.3|GGA1	79.87	1118	174	15	263	1355	7277311	7276220	0	980	22646	M
SMAC_Scaffolded_contig_106506	gi|358485511|ref|NC_006088.3|GGA1	72.79	2154	418	39	240	2312	7280839	7278773	0	1218	2	S
SMAC_Scaffolded_contig_15278	gi|358485511|ref|NC_006088.3|GGA1	73.59	2934	573	62	4380	7196	7284054	7281206	0	1700	7365	M
SMAC_Scaffolded_contig_154985	gi|358485511|ref|NC_006088.3|GGA1	89.47	57	6	0	463	519	7287140	7287084	3e-12	77	6632	M
SMAC_Scaffolded_contig_98943	gi|358485511|ref|NC_006088.3|GGA1	74.24	1949	346	38	1030	2899	7300289	7298418	0	1222	336	M
SMAC_Scaffolded_contig_61773	gi|358485511|ref|NC_006088.3|GGA1	78.12	672	103	12	3799	4453	7307852	7308496	6e-149	535	3	S
SMAC_Scaffolded_contig_111127	gi|358485511|ref|NC_006088.3|GGA1	74.63	201	38	6	238	435	7312473	7312663	1e-24	118	1	S
SMAC_Scaffolded_contig_81268	gi|358485511|ref|NC_006088.3|GGA1	72.83	622	141	10	5132	5732	7313295	7313909	3e-90	340	629	M
SMAC_Scaffolded_contig_62166	gi|358485511|ref|NC_006088.3|GGA1	77.13	2313	373	42	762	3000	7318928	7321158	0	1737	11117	M
SMAC_Scaffolded_contig_163582	gi|358485511|ref|NC_006088.3|GGA1	77.5	591	103	8	580	1149	7325459	7324878	3e-126	457	3	S
SMAC_Scaffolded_contig_141128	gi|358485511|ref|NC_006088.3|GGA1	74.35	733	107	17	2	667	7326119	7326837	6e-131	471	1	S
SMAC_Scaffolded_contig_169018	gi|358485511|ref|NC_006088.3|GGA1	82.68	179	21	3	39	217	7326980	7327148	6e-43	179	3	S
SMAC_Scaffolded_contig_158173	gi|358485511|ref|NC_006088.3|GGA1	78.57	406	78	5	40	444	7342893	7342496	5e-87	325	1	S
SMAC_Scaffolded_contig_47491	gi|358485511|ref|NC_006088.3|GGA1	82.56	86	13	2	3293	3376	7351026	7351111	2e-12	80	5924	M
SMAC_Scaffolded_contig_27029	gi|358485511|ref|NC_006088.3|GGA1	89.36	47	4	1	832	877	7351051	7351097	2e-06	59	209	M
SMAC_Scaffolded_contig_148528	gi|358485511|ref|NC_006088.3|GGA1	87.68	138	14	1	433	570	7361665	7361799	2e-40	170	1	S
SMAC_Scaffolded_contig_1668	gi|358485511|ref|NC_006088.3|GGA1	77.23	4576	746	79	26526	30971	7365629	7361220	0	3465	943	M
SMAC_Scaffolded_contig_84387	gi|358485511|ref|NC_006088.3|GGA1	87.5	32	4	0	315	346	7371715	7371746	0.29	41	23	M
SMAC_Scaffolded_contig_162388	gi|358485511|ref|NC_006088.3|GGA1	87.88	33	4	0	763	795	7371974	7372006	0.14	42	50	M
SMAC_Scaffolded_contig_21189	gi|358485511|ref|NC_006088.3|GGA1	73.88	134	20	5	183	303	7388406	7388275	2e-11	75	81	M
SMAC_Scaffolded_contig_68488	gi|358485511|ref|NC_006088.3|GGA1	72.59	259	58	5	2083	2341	7389749	7389504	2e-29	136	1	S
SMAC_Scaffolded_contig_3186	gi|358485511|ref|NC_006088.3|GGA1	72.59	1715	371	36	5204	6853	7395469	7397149	0	901	19284	M
SMAC_Scaffolded_contig_157324	gi|358485511|ref|NC_006088.3|GGA1	86.49	37	3	1	382	416	7400840	7400804	0.082	42	46	M
SMAC_Scaffolded_contig_23114	gi|358485511|ref|NC_006088.3|GGA1	76.6	470	106	3	136	602	7402452	7402920	3e-95	352	16475	M
SMAC_Scaffolded_contig_115775	gi|358485511|ref|NC_006088.3|GGA1	81.31	289	46	4	1	282	7402724	7402437	4e-69	268	29556	M
SMAC_Scaffolded_contig_50298	gi|358485511|ref|NC_006088.3|GGA1	76.02	392	86	4	17460	17844	7402815	7402425	8e-70	273	9878	M
SMAC_Scaffolded_contig_149734	gi|358485511|ref|NC_006088.3|GGA1	69.75	628	144	11	5944	6528	7403063	7402439	1e-68	268	5349	M
SMAC_Scaffolded_contig_124626	gi|358485511|ref|NC_006088.3|GGA1	72.97	344	73	6	5	348	7405050	7404727	8e-47	192	2	S
SMAC_Scaffolded_contig_49454	gi|358485511|ref|NC_006088.3|GGA1	68.95	1652	359	40	2168	3752	7408467	7406903	4e-176	625	4	S
SMAC_Scaffolded_contig_73459	gi|358485511|ref|NC_006088.3|GGA1	71.29	2421	499	55	2377	4694	7412232	7414559	0	1162	8838	M
SMAC_Scaffolded_contig_92443	gi|358485511|ref|NC_006088.3|GGA1	70.97	1223	243	26	257	1430	7414559	7413400	9e-166	589	347	M
SMAC_Scaffolded_contig_121765	gi|358485511|ref|NC_006088.3|GGA1	73.86	635	121	12	274	882	7419427	7420042	7e-104	383	2	S
SMAC_Scaffolded_contig_625	gi|358485511|ref|NC_006088.3|GGA1	71.68	1356	279	26	7602	8892	7422417	7421102	0	691	39	M
SMAC_Scaffolded_contig_50871	gi|358485511|ref|NC_006088.3|GGA1	70.74	2030	414	53	1058	3004	7425578	7427510	0	906	2545	M
SMAC_Scaffolded_contig_166593	gi|358485511|ref|NC_006088.3|GGA1	74.39	328	78	3	84	410	7435831	7436153	1e-50	205	1	S
SMAC_Scaffolded_contig_96439	gi|358485511|ref|NC_006088.3|GGA1	75.99	729	150	11	2295	3003	7455898	7455175	4e-138	499	6	S
SMAC_Scaffolded_contig_33373	gi|358485511|ref|NC_006088.3|GGA1	68.31	2193	468	49	1115	3162	7459022	7461132	0	805	1	S
SMAC_Scaffolded_contig_105079	gi|358485511|ref|NC_006088.3|GGA1	70.72	1298	325	30	2293	3566	7462818	7461552	2e-151	542	3	S
SMAC_Scaffolded_contig_172003	gi|358485511|ref|NC_006088.3|GGA1	77.36	751	117	10	15	732	7465188	7465918	1e-166	590	1	S
SMAC_Scaffolded_contig_450	gi|358485511|ref|NC_006088.3|GGA1	72.36	1241	248	37	24	1213	7472032	7470836	3e-172	610	2	S
SMAC_Scaffolded_contig_449	gi|358485511|ref|NC_006088.3|GGA1	69.48	3365	669	90	12981	16190	7478208	7481369	0	1355	13	M
SMAC_Scaffolded_contig_115383	gi|358485511|ref|NC_006088.3|GGA1	76.37	182	41	2	610	790	7483482	7483662	3e-27	127	2	S
SMAC_Scaffolded_contig_109277	gi|358485511|ref|NC_006088.3|GGA1	73.16	1654	337	26	2249	3832	7495281	7493665	0	960	12	S
SMAC_Scaffolded_contig_35739	gi|358485511|ref|NC_006088.3|GGA1	72.51	2706	526	53	5282	7823	7503324	7505975	0	1483	13	M
SMAC_Scaffolded_contig_35740	gi|358485511|ref|NC_006088.3|GGA1	74.44	622	120	14	1368	1957	7508419	7507805	3e-102	378	2	S
SMAC_Scaffolded_contig_133006	gi|358485511|ref|NC_006088.3|GGA1	75.89	3160	584	42	1	3060	7516106	7513025	0	2235	975	M
SMAC_Scaffolded_contig_167304	gi|358485511|ref|NC_006088.3|GGA1	70.51	1970	375	46	595	2491	7516675	7518511	0	911	2	S
SMAC_Scaffolded_contig_129264	gi|358485511|ref|NC_006088.3|GGA1	72.5	5375	965	118	289	5436	7519579	7524667	0	2960	3	S
SMAC_Scaffolded_contig_84604	gi|358485511|ref|NC_006088.3|GGA1	77.43	4262	723	65	6126	10249	7533954	7538114	0	3272	153	M
SMAC_Scaffolded_contig_34621	gi|358485511|ref|NC_006088.3|GGA1	73.68	380	82	8	408	783	7539154	7539519	1e-53	215	7924	M
SMAC_Scaffolded_contig_92632	gi|358485511|ref|NC_006088.3|GGA1	69.34	574	129	9	172	738	7540192	7539659	4e-62	244	52	M
SMAC_Scaffolded_contig_75794	gi|358485511|ref|NC_006088.3|GGA1	82.55	321	55	1	156	475	7542269	7541949	4e-86	324	223	M
SMAC_Scaffolded_contig_107783	gi|358485511|ref|NC_006088.3|GGA1	76.48	1220	204	23	423	1574	7543929	7542725	0	877	1	S
SMAC_Scaffolded_contig_107782	gi|358485511|ref|NC_006088.3|GGA1	69.11	2072	459	47	263	2234	7544094	7546084	0	803	681	M
SMAC_Scaffolded_contig_122390	gi|358485511|ref|NC_006088.3|GGA1	65.92	1347	322	38	1293	2573	7562428	7563703	1e-82	313	25	M
SMAC_Scaffolded_contig_123205	gi|358485511|ref|NC_006088.3|GGA1	70.36	3411	765	72	2504	5803	7567353	7564078	0	1490	5	M
SMAC_Scaffolded_contig_100757	gi|358485511|ref|NC_006088.3|GGA1	72.49	1945	392	37	1	1839	7575099	7573192	0	1058	3	S
SMAC_Scaffolded_contig_1704	gi|358485511|ref|NC_006088.3|GGA1	73.93	4077	796	71	21337	25278	7589444	7593388	0	2480	15479	M
SMAC_Scaffolded_contig_29137	gi|358485511|ref|NC_006088.3|GGA1	78.48	1552	253	22	174	1662	7602888	7601355	0	1267	3	S
SMAC_Scaffolded_contig_84987	gi|358485511|ref|NC_006088.3|GGA1	75.56	2013	367	40	32	1980	7607510	7605559	0	1344	2	S
SMAC_Scaffolded_contig_119365	gi|358485511|ref|NC_006088.3|GGA1	72.42	417	83	8	228	635	7607782	7608175	4e-57	226	1	S
SMAC_Scaffolded_contig_14465	gi|358485511|ref|NC_006088.3|GGA1	74.26	2098	438	36	2629	4681	7611308	7613348	0	1279	6	S
SMAC_Scaffolded_contig_14466	gi|358485511|ref|NC_006088.3|GGA1	74.56	1262	264	21	1131	2363	7613348	7612115	0	785	3	S
SMAC_Scaffolded_contig_104652	gi|358485511|ref|NC_006088.3|GGA1	81.28	438	75	3	565	999	7618095	7618528	2e-113	414	1	S
SMAC_Scaffolded_contig_31212	gi|358485511|ref|NC_006088.3|GGA1	71.88	2873	583	64	13403	16192	7626727	7629457	0	1452	8	S
SMAC_Scaffolded_contig_27984	gi|358485511|ref|NC_006088.3|GGA1	71.61	2212	464	49	50	2161	7631306	7633453	0	1085	2851	M
SMAC_Scaffolded_contig_130490	gi|358485511|ref|NC_006088.3|GGA1	67.43	1437	332	31	7	1382	7638791	7637430	2e-128	464	1	S
SMAC_Scaffolded_contig_122374	gi|358485511|ref|NC_006088.3|GGA1	67.76	2658	628	71	254	2794	7641636	7639091	0	816	389	M
SMAC_Scaffolded_contig_26870	gi|358485511|ref|NC_006088.3|GGA1	79.66	59	11	1	1783	1841	7641721	7641664	0.002	50	169	M
SMAC_Scaffolded_contig_68031	gi|358485511|ref|NC_006088.3|GGA1	71.62	2435	534	46	17921	20238	7658307	7660701	0	1211	10599	M
SMAC_Scaffolded_contig_37413	gi|358485511|ref|NC_006088.3|GGA1	72.66	684	128	17	9021	9689	7662695	7662056	3e-98	367	74	M
SMAC_Scaffolded_contig_126688	gi|358485511|ref|NC_006088.3|GGA1	75.48	877	175	15	907	1760	7664576	7665435	1e-163	581	2	S
SMAC_Scaffolded_contig_180160	gi|358485511|ref|NC_006088.3|GGA1	91.18	34	2	1	32	65	7666467	7666499	0.027	44	80	M
SMAC_Scaffolded_contig_93203	gi|358485511|ref|NC_006088.3|GGA1	71.23	1863	388	41	5959	7746	7678002	7679791	0	892	7	M
SMAC_Scaffolded_contig_124220	gi|358485511|ref|NC_006088.3|GGA1	81.09	920	134	9	4792	5693	7685010	7685907	0	870	7	M
SMAC_Scaffolded_contig_157584	gi|358485511|ref|NC_006088.3|GGA1	71.64	3322	696	75	1648	4852	7692850	7689658	0	1627	2	S
SMAC_Scaffolded_contig_40632	gi|358485511|ref|NC_006088.3|GGA1	82.39	903	137	12	729	1627	7696352	7697236	0	877	1	S
SMAC_Scaffolded_contig_148245	gi|358485511|ref|NC_006088.3|GGA1	68.66	284	71	8	237	514	7697773	7698044	2e-16	91	33	M
SMAC_Scaffolded_contig_46566	gi|358485511|ref|NC_006088.3|GGA1	79.05	1179	218	15	1457	2621	7703406	7702243	0	971	2715	M
SMAC_Scaffolded_contig_185201	gi|358485511|ref|NC_006088.3|GGA1	75.37	134	33	0	4953	5086	7706321	7706454	4e-16	93	1384	M
SMAC_Scaffolded_contig_149391	gi|358485511|ref|NC_006088.3|GGA1	83.33	72	12	0	515	586	7706402	7706331	4e-12	77	1678	M
SMAC_Scaffolded_contig_37218	gi|358485511|ref|NC_006088.3|GGA1	79.61	152	31	0	398	549	7706404	7706253	1e-29	134	164	M
SMAC_Scaffolded_contig_102486	gi|358485511|ref|NC_006088.3|GGA1	76.09	92	22	0	512	603	7706414	7706323	2e-09	68	7233	M
SMAC_Scaffolded_contig_54522	gi|358485511|ref|NC_006088.3|GGA1	80.43	92	18	0	1487	1578	7706414	7706323	2e-14	86	10266	M
SMAC_Scaffolded_contig_135084	gi|358485511|ref|NC_006088.3|GGA1	70.32	566	125	10	2	534	7706646	7706091	4e-70	269	5440	M
SMAC_Scaffolded_contig_183293	gi|358485511|ref|NC_006088.3|GGA1	75.36	276	49	5	276	541	7709628	7709362	3e-45	187	1	S
SMAC_Scaffolded_contig_68578	gi|358485511|ref|NC_006088.3|GGA1	74.59	1708	339	33	151	1822	7713892	7715540	0	1061	2	S
SMAC_Scaffolded_contig_67948	gi|358485511|ref|NC_006088.3|GGA1	71.76	262	56	5	535	781	7717558	7717816	2e-28	132	29	M
SMAC_Scaffolded_contig_55786	gi|358485511|ref|NC_006088.3|GGA1	73.68	228	56	3	856	1081	7717794	7717569	1e-27	131	55	M
SMAC_Scaffolded_contig_189456	gi|358485511|ref|NC_006088.3|GGA1	96.3	27	1	0	276	302	7723801	7723775	0.024	44	41	M
SMAC_Scaffolded_contig_46567	gi|358485511|ref|NC_006088.3|GGA1	71.5	3369	729	78	23934	27182	7726903	7730160	0	1604	13	M
SMAC_Scaffolded_contig_183265	gi|358485511|ref|NC_006088.3|GGA1	71.18	465	88	11	2	457	7733497	7733924	6e-60	235	1	S
SMAC_Scaffolded_contig_44487	gi|358485511|ref|NC_006088.3|GGA1	71.23	2982	653	70	3503	6390	7741131	7738261	0	1379	8	S
SMAC_Scaffolded_contig_174071	gi|358485511|ref|NC_006088.3|GGA1	75.28	271	55	6	234	499	7748047	7748310	2e-40	170	1	S
SMAC_Scaffolded_contig_128931	gi|358485511|ref|NC_006088.3|GGA1	67.46	2225	486	62	5920	8065	7750485	7748420	0	684	1819	M
SMAC_Scaffolded_contig_128932	gi|358485511|ref|NC_006088.3|GGA1	71.97	917	188	22	842	1702	7750730	7751633	1e-126	459	6	M
SMAC_Scaffolded_contig_121825	gi|358485511|ref|NC_006088.3|GGA1	77.81	338	59	6	2145	2473	7756092	7755762	3e-66	259	3	S
SMAC_Scaffolded_contig_187169	gi|358485511|ref|NC_006088.3|GGA1	80.56	571	91	9	39	595	7756143	7756707	7e-142	508	1	S
SMAC_Scaffolded_contig_120030	gi|358485511|ref|NC_006088.3|GGA1	72.11	667	152	11	3043	3701	7758218	7757578	3e-92	345	4	M
SMAC_Scaffolded_contig_48786	gi|358485511|ref|NC_006088.3|GGA1	69.63	2539	549	65	17940	20390	7770458	7772862	0	1011	663	M
SMAC_Scaffolded_contig_165797	gi|358485511|ref|NC_006088.3|GGA1	76.08	209	42	3	339	546	7773190	7773391	8e-33	145	1	S
SMAC_Scaffolded_contig_73899	gi|358485511|ref|NC_006088.3|GGA1	69.98	876	170	20	515	1344	7783748	7782920	1e-105	389	2	S
SMAC_Scaffolded_contig_122509	gi|358485511|ref|NC_006088.3|GGA1	73.03	1461	297	24	103	1517	7791880	7790471	0	838	2	S
SMAC_Scaffolded_contig_57597	gi|358485511|ref|NC_006088.3|GGA1	79.34	576	92	9	5476	6034	7794250	7794815	3e-134	486	696	M
SMAC_Scaffolded_contig_78172	gi|358485511|ref|NC_006088.3|GGA1	70.48	2581	529	60	4978	7453	7797393	7799845	0	1159	3645	M
SMAC_Scaffolded_contig_98357	gi|358485511|ref|NC_006088.3|GGA1	83.78	37	6	0	489	525	7799763	7799799	0.28	41	33	M
SMAC_Scaffolded_contig_187989	gi|358485511|ref|NC_006088.3|GGA1	77.86	140	20	4	389	518	7803494	7803356	7e-21	105	1	S
SMAC_Scaffolded_contig_145396	gi|358485511|ref|NC_006088.3|GGA1	68.1	630	119	17	1	615	7807611	7807049	1e-57	228	1	S
SMAC_Scaffolded_contig_96268	gi|358485511|ref|NC_006088.3|GGA1	84.09	44	6	1	474	516	7809252	7809295	0.021	44	27	M
SMAC_Scaffolded_contig_81790	gi|358485511|ref|NC_006088.3|GGA1	93.1	29	2	0	155	183	7814321	7814293	0.072	44	49	M
SMAC_Scaffolded_contig_83295	gi|358485511|ref|NC_006088.3|GGA1	72.59	4999	1069	97	14377	19223	7815434	7820283	0	2673	11	M
SMAC_Scaffolded_contig_168886	gi|358485511|ref|NC_006088.3|GGA1	91.18	34	3	0	250	283	7820274	7820241	0.002	48	98	M
SMAC_Scaffolded_contig_158108	gi|358485511|ref|NC_006088.3|GGA1	80.75	322	43	10	285	593	7820577	7820262	3e-71	273	2	M
SMAC_Scaffolded_contig_106187	gi|358485511|ref|NC_006088.3|GGA1	73.76	423	82	7	3	417	7823042	7823443	3e-66	257	1	S
SMAC_Scaffolded_contig_167665	gi|358485511|ref|NC_006088.3|GGA1	75.37	601	132	6	55	653	7823734	7824320	7e-111	405	1	S
SMAC_Scaffolded_contig_104140	gi|358485511|ref|NC_006088.3|GGA1	73.86	1519	303	32	381	1845	7828878	7827400	0	890	21467	M
SMAC_Scaffolded_contig_123396	gi|358485511|ref|NC_006088.3|GGA1	70.99	1065	214	28	32	1057	7831393	7830385	2e-135	488	2	S
SMAC_Scaffolded_contig_123395	gi|358485511|ref|NC_006088.3|GGA1	72.32	401	99	6	201	593	7831772	7831376	3e-51	206	1	S
SMAC_Scaffolded_contig_19148	gi|358485511|ref|NC_006088.3|GGA1	72.07	333	72	7	1	314	7843974	7843644	2e-39	168	2	S
SMAC_Scaffolded_contig_11189	gi|358485511|ref|NC_006088.3|GGA1	74.67	1275	239	27	631	1865	7844874	7843644	0	798	8	S
SMAC_Scaffolded_contig_151040	gi|358485511|ref|NC_006088.3|GGA1	69.39	895	186	25	22	851	7846728	7847599	5e-92	345	3	S
SMAC_Scaffolded_contig_8993	gi|358485511|ref|NC_006088.3|GGA1	76.32	1115	217	12	4448	5560	7849578	7848509	0	809	2	S
SMAC_Scaffolded_contig_41382	gi|358485511|ref|NC_006088.3|GGA1	64.89	1310	335	31	4779	6025	7855731	7856978	5e-67	262	2	S
SMAC_Scaffolded_contig_77925	gi|358485511|ref|NC_006088.3|GGA1	69.83	3931	872	77	262	4094	7857143	7860857	0	1678	18381	M
SMAC_Scaffolded_contig_187273	gi|358485511|ref|NC_006088.3|GGA1	81.22	213	36	3	59	268	7863116	7862905	2e-47	194	1	S
SMAC_Scaffolded_contig_156007	gi|358485511|ref|NC_006088.3|GGA1	73.8	794	170	14	673	1457	7864507	7865271	7e-129	466	1	S
SMAC_Scaffolded_contig_91066	gi|358485511|ref|NC_006088.3|GGA1	69.48	1019	277	14	5999	6991	7866503	7865493	4e-109	403	1578	M
SMAC_Scaffolded_contig_118689	gi|358485511|ref|NC_006088.3|GGA1	68.33	1203	251	19	714	1863	7871225	7870100	5e-134	484	4711	M
SMAC_Scaffolded_contig_15460	gi|358485511|ref|NC_006088.3|GGA1	70.46	4211	879	97	8937	13079	7875501	7871588	0	1878	5	S
SMAC_Scaffolded_contig_28446	gi|358485511|ref|NC_006088.3|GGA1	66.32	1948	416	51	24	1840	7882650	7884488	5e-151	542	14	M
SMAC_Scaffolded_contig_48022	gi|358485511|ref|NC_006088.3|GGA1	70.89	711	162	12	705	1391	7891118	7890429	8e-90	336	7503	M
SMAC_Scaffolded_contig_35777	gi|358485511|ref|NC_006088.3|GGA1	70.92	2153	452	49	1	2069	7897317	7895255	0	996	3	S
SMAC_Scaffolded_contig_133272	gi|358485511|ref|NC_006088.3|GGA1	71.9	274	66	6	4892	5164	7897570	7897307	2e-27	131	2	S
SMAC_Scaffolded_contig_3005	gi|358485511|ref|NC_006088.3|GGA1	70.32	2908	622	65	7478	10321	7900288	7897558	0	1278	5	S
SMAC_Scaffolded_contig_108500	gi|358485511|ref|NC_006088.3|GGA1	79.52	1240	204	17	616	1850	7909940	7908746	0	1059	1	S
SMAC_Scaffolded_contig_129658	gi|358485511|ref|NC_006088.3|GGA1	75.15	515	119	6	4	516	7912263	7911756	3e-89	333	1	S
SMAC_Scaffolded_contig_112668	gi|358485511|ref|NC_006088.3|GGA1	72.34	1193	252	25	1621	2777	7912403	7913553	3e-175	621	25588	M
SMAC_Scaffolded_contig_76720	gi|358485511|ref|NC_006088.3|GGA1	96.15	26	1	0	143	168	7912581	7912606	0.1	42	17	M
SMAC_Scaffolded_contig_184111	gi|358485511|ref|NC_006088.3|GGA1	72.5	531	101	12	27	521	7916511	7915990	4e-75	286	1	S
SMAC_Scaffolded_contig_94193	gi|358485511|ref|NC_006088.3|GGA1	68.13	1390	320	29	2166	3499	7918022	7916700	2e-135	489	3	S
SMAC_Scaffolded_contig_31814	gi|358485511|ref|NC_006088.3|GGA1	74.22	931	192	16	152	1045	7922676	7921757	9e-160	569	2	S
SMAC_Scaffolded_contig_181083	gi|358485511|ref|NC_006088.3|GGA1	72.33	506	107	16	152	644	7931870	7932355	6e-61	239	1	S
SMAC_Scaffolded_contig_31780	gi|358485511|ref|NC_006088.3|GGA1	72.13	2885	607	56	1284	4071	7941829	7939045	0	1503	58	M
SMAC_Scaffolded_contig_107907	gi|358485511|ref|NC_006088.3|GGA1	69.12	1441	319	35	1150	2526	7946019	7947397	2e-153	549	2	S
SMAC_Scaffolded_contig_160062	gi|358485511|ref|NC_006088.3|GGA1	70.77	1550	347	29	100	1585	7947775	7949282	0	719	1	S
SMAC_Scaffolded_contig_130355	gi|358485511|ref|NC_006088.3|GGA1	83.12	237	38	2	1811	2045	7955422	7955658	1e-60	241	1988	M
SMAC_Scaffolded_contig_106133	gi|358485511|ref|NC_006088.3|GGA1	75.61	205	49	1	748	952	7955438	7955641	2e-31	141	65	M
SMAC_Scaffolded_contig_152771	gi|358485511|ref|NC_006088.3|GGA1	96.3	27	1	0	1	27	7958084	7958058	0.019	44	196	M
SMAC_Scaffolded_contig_62850	gi|358485511|ref|NC_006088.3|GGA1	75.64	1728	317	25	12953	14593	7962278	7963988	0	1200	15	M
SMAC_Scaffolded_contig_153677	gi|358485511|ref|NC_006088.3|GGA1	69.87	1646	348	44	291	1854	7965803	7967382	0	668	4	M
SMAC_Scaffolded_contig_26489	gi|358485511|ref|NC_006088.3|GGA1	70.4	348	90	7	2611	2957	7968330	7968665	2e-31	143	16	M
SMAC_Scaffolded_contig_18214	gi|358485511|ref|NC_006088.3|GGA1	72.01	1804	376	36	46	1791	7971603	7973335	0	931	6548	M
SMAC_Scaffolded_contig_132911	gi|358485511|ref|NC_006088.3|GGA1	71.21	1747	386	33	1420	3112	7981092	7982775	0	839	27	M
SMAC_Scaffolded_contig_102776	gi|358485511|ref|NC_006088.3|GGA1	70.37	1532	308	35	927	2396	7984495	7983048	0	690	1498	M
SMAC_Scaffolded_contig_79109	gi|358485511|ref|NC_006088.3|GGA1	72.94	2753	589	46	123	2822	7990876	7988227	0	1539	3	S
SMAC_Scaffolded_contig_79108	gi|358485511|ref|NC_006088.3|GGA1	76.9	1182	201	28	34	1161	7993600	7994763	0	839	2	S
SMAC_Scaffolded_contig_165172	gi|358485511|ref|NC_006088.3|GGA1	73.02	923	186	24	885	1782	7995891	7995007	2e-136	491	2	S
SMAC_Scaffolded_contig_165171	gi|358485511|ref|NC_006088.3|GGA1	74.27	2227	444	39	473	2626	7996899	7999069	0	1373	2748	M
SMAC_Scaffolded_contig_150539	gi|358485511|ref|NC_006088.3|GGA1	71.47	694	149	15	845	1506	7999069	7998393	7e-90	336	1586	M
SMAC_Scaffolded_contig_125851	gi|358485511|ref|NC_006088.3|GGA1	70.37	2015	404	45	635	2559	8004084	8002173	0	913	4	S
SMAC_Scaffolded_contig_71824	gi|358485511|ref|NC_006088.3|GGA1	73.3	1719	321	43	2845	4495	8006394	8004746	0	962	10185	M
SMAC_Scaffolded_contig_94544	gi|358485511|ref|NC_006088.3|GGA1	76.24	1250	249	21	158	1384	8015480	8014256	0	865	1624	M
SMAC_Scaffolded_contig_49066	gi|358485511|ref|NC_006088.3|GGA1	91.18	34	3	0	120	153	8017424	8017391	0.002	48	41	M
SMAC_Scaffolded_contig_55170	gi|358485511|ref|NC_006088.3|GGA1	74.23	1556	301	27	4469	5966	8022186	8023699	0	967	1122	M
SMAC_Scaffolded_contig_175423	gi|358485511|ref|NC_006088.3|GGA1	76.86	497	91	7	393	885	8026779	8026303	4e-99	369	7	M
SMAC_Scaffolded_contig_159359	gi|358485511|ref|NC_006088.3|GGA1	73.52	1337	251	22	3749	5062	8034143	8032887	0	809	3	S
SMAC_Scaffolded_contig_100395	gi|358485511|ref|NC_006088.3|GGA1	76.02	1351	232	19	9750	11048	8034159	8035469	0	973	6	S
SMAC_Scaffolded_contig_178966	gi|358485511|ref|NC_006088.3|GGA1	73.38	417	87	9	448	846	8040586	8040176	3e-59	233	2	S
SMAC_Scaffolded_contig_93075	gi|358485511|ref|NC_006088.3|GGA1	70.93	2043	398	37	3931	5887	8045923	8047855	0	1016	8	S
SMAC_Scaffolded_contig_87426	gi|358485511|ref|NC_006088.3|GGA1	69.41	1033	204	21	5	1000	8046898	8047855	2e-122	444	2	S
SMAC_Scaffolded_contig_95012	gi|358485511|ref|NC_006088.3|GGA1	70.68	805	181	15	6	771	8052312	8053100	9e-104	381	1	S
SMAC_Scaffolded_contig_89803	gi|358485511|ref|NC_006088.3|GGA1	76.06	944	164	18	417	1324	8055466	8054549	0	659	2	S
SMAC_Scaffolded_contig_128510	gi|358485511|ref|NC_006088.3|GGA1	77.44	461	95	4	368	825	8056416	8056870	1e-94	352	3	M
SMAC_Scaffolded_contig_63266	gi|358485511|ref|NC_006088.3|GGA1	69.18	1311	259	28	49	1259	8061024	8059759	4e-153	547	310	M
SMAC_Scaffolded_contig_63267	gi|358485511|ref|NC_006088.3|GGA1	74.96	1250	281	12	1757	2998	8063087	8064312	0	818	3	S
SMAC_Scaffolded_contig_62302	gi|358485511|ref|NC_006088.3|GGA1	72.11	3518	694	76	9625	13010	8071916	8068554	0	1838	10	S
SMAC_Scaffolded_contig_184590	gi|358485511|ref|NC_006088.3|GGA1	75.59	381	82	5	1814	2183	8076569	8076189	3e-65	255	2	S
SMAC_Scaffolded_contig_110167	gi|358485511|ref|NC_006088.3|GGA1	73.31	3305	623	71	149	3337	8080945	8084106	0	1900	1	S
SMAC_Scaffolded_contig_35270	gi|358485511|ref|NC_006088.3|GGA1	77.93	2062	359	30	15917	17925	8087339	8085321	0	1618	2363	M
SMAC_Scaffolded_contig_154422	gi|358485511|ref|NC_006088.3|GGA1	74.63	335	75	7	726	1056	8090158	8089830	9e-49	199	1	S
SMAC_Scaffolded_contig_167090	gi|358485511|ref|NC_006088.3|GGA1	66.67	1884	437	57	53	1867	8092976	8091215	9e-134	482	1	S
SMAC_Scaffolded_contig_112365	gi|358485511|ref|NC_006088.3|GGA1	75.29	1392	280	24	2039	3416	8103427	8104768	0	910	1	S
SMAC_Scaffolded_contig_82837	gi|358485511|ref|NC_006088.3|GGA1	67.31	1927	443	43	1181	2980	8107531	8105665	4e-172	610	863	M
SMAC_Scaffolded_contig_90055	gi|358485511|ref|NC_006088.3|GGA1	78.11	804	144	11	985	1770	8109045	8109834	6e-180	636	1	S
SMAC_Scaffolded_contig_163632	gi|358485511|ref|NC_006088.3|GGA1	79.12	795	121	13	132	888	8116330	8117117	0	668	4	S
SMAC_Scaffolded_contig_72546	gi|358485511|ref|NC_006088.3|GGA1	70.04	3258	724	74	1243	4335	8123556	8120386	0	1370	9890	M
SMAC_Scaffolded_contig_74091	gi|358485511|ref|NC_006088.3|GGA1	71.07	1673	291	33	2947	4459	8129258	8130897	0	861	2	S
SMAC_Scaffolded_contig_100357	gi|358485511|ref|NC_006088.3|GGA1	76.41	674	137	11	1350	2016	8131869	8131211	7e-130	470	1	S
SMAC_Scaffolded_contig_144262	gi|358485511|ref|NC_006088.3|GGA1	76.05	167	35	2	2	168	8139289	8139128	5e-24	116	1	S
SMAC_Scaffolded_contig_73401	gi|358485511|ref|NC_006088.3|GGA1	72.72	2357	465	39	9327	11584	8142262	8144539	0	1353	10	S
SMAC_Scaffolded_contig_46559	gi|358485511|ref|NC_006088.3|GGA1	75.21	2497	447	50	1811	4252	8150946	8148567	0	1642	3907	M
SMAC_Scaffolded_contig_72493	gi|358485511|ref|NC_006088.3|GGA1	70.7	901	222	16	142	1010	8152870	8153760	3e-109	401	24361	M
SMAC_Scaffolded_contig_172640	gi|358485511|ref|NC_006088.3|GGA1	84.62	39	6	0	180	218	8158744	8158782	0.038	44	86	M
SMAC_Scaffolded_contig_27370	gi|358485511|ref|NC_006088.3|GGA1	75.22	1388	253	26	4556	5916	8162763	8161440	0	917	24436	M
SMAC_Scaffolded_contig_64310	gi|358485511|ref|NC_006088.3|GGA1	77.95	1152	213	12	2978	4110	8165480	8166609	0	915	3	S
SMAC_Scaffolded_contig_128179	gi|358485511|ref|NC_006088.3|GGA1	77.29	273	47	6	931	1197	8169040	8169303	1e-48	199	2	S
SMAC_Scaffolded_contig_166287	gi|358485511|ref|NC_006088.3|GGA1	75.48	1032	171	18	984	1965	8170652	8169653	0	713	2	S
SMAC_Scaffolded_contig_79446	gi|358485511|ref|NC_006088.3|GGA1	74.19	1259	214	29	372	1545	8176278	8175046	0	774	1	S
SMAC_Scaffolded_contig_79447	gi|358485511|ref|NC_006088.3|GGA1	70.33	4136	847	109	6708	10671	8176447	8180374	0	1779	9	M
SMAC_Scaffolded_contig_183305	gi|358485511|ref|NC_006088.3|GGA1	75.47	265	52	5	1	258	8186853	8186595	2e-41	174	1	S
SMAC_Scaffolded_contig_115469	gi|358485511|ref|NC_006088.3|GGA1	71.91	680	155	11	54	704	8187777	8187105	5e-94	349	1	S
SMAC_Scaffolded_contig_154701	gi|358485511|ref|NC_006088.3|GGA1	70.1	612	145	15	68	665	8187865	8188452	4e-63	246	1	S
SMAC_Scaffolded_contig_144804	gi|358485511|ref|NC_006088.3|GGA1	75.79	508	104	6	38	536	8217347	8217844	3e-95	352	1	S
SMAC_Scaffolded_contig_171856	gi|358485511|ref|NC_006088.3|GGA1	86.84	38	3	1	688	725	8222371	8222406	0.03	44	57	M
SMAC_Scaffolded_contig_8213	gi|358485511|ref|NC_006088.3|GGA1	71.11	6460	1258	127	37084	43253	8226812	8232953	0	3213	503	M
SMAC_Scaffolded_contig_168902	gi|358485511|ref|NC_006088.3|GGA1	70.6	1694	390	36	192	1807	8245406	8247069	0	746	1	S
SMAC_Scaffolded_contig_68057	gi|358485511|ref|NC_006088.3|GGA1	78.08	3203	522	46	559	3684	8254336	8257435	0	2567	2	S
SMAC_Scaffolded_contig_100528	gi|358485511|ref|NC_006088.3|GGA1	81.63	49	7	1	426	474	8258557	8258511	0.008	46	47	M
SMAC_Scaffolded_contig_141750	gi|358485511|ref|NC_006088.3|GGA1	76.17	2321	426	43	1	2264	8259882	8257632	0	1613	1	S
SMAC_Scaffolded_contig_142620	gi|358485511|ref|NC_006088.3|GGA1	81.95	687	104	7	1141	1824	8264277	8263608	0	666	3	S
SMAC_Scaffolded_contig_129667	gi|358485511|ref|NC_006088.3|GGA1	73.65	1146	223	24	104	1216	8264608	8265707	0	668	1	S
SMAC_Scaffolded_contig_128080	gi|358485511|ref|NC_006088.3|GGA1	75.01	4833	934	87	1	4698	8272656	8267963	0	3124	3	S
SMAC_Scaffolded_contig_154548	gi|358485511|ref|NC_006088.3|GGA1	67.9	732	167	18	11	715	8273842	8273152	2e-61	241	1	S
SMAC_Scaffolded_contig_92474	gi|358485511|ref|NC_006088.3|GGA1	71.54	1553	296	29	1662	3110	8280824	8279314	0	809	10	S
SMAC_Scaffolded_contig_150328	gi|358485511|ref|NC_006088.3|GGA1	77.99	1036	179	19	138	1136	8284214	8285237	0	800	2	S
SMAC_Scaffolded_contig_117258	gi|358485511|ref|NC_006088.3|GGA1	71.69	2642	488	57	689	3222	8285662	8288151	0	1370	3	S
SMAC_Scaffolded_contig_181608	gi|358485511|ref|NC_006088.3|GGA1	78.95	76	15	1	543	618	8317392	8317318	1e-07	62	96	M
SMAC_Scaffolded_contig_31584	gi|358485511|ref|NC_006088.3|GGA1	80.11	5064	789	64	27418	32397	8318305	8323234	0	4500	31	M
SMAC_Scaffolded_contig_183132	gi|358485511|ref|NC_006088.3|GGA1	81.59	516	83	6	10	519	8331753	8331244	2e-135	486	1	S
SMAC_Scaffolded_contig_153473	gi|358485511|ref|NC_006088.3|GGA1	80.1	196	30	2	2587	2778	8333324	8333514	8e-42	178	2	S
SMAC_Scaffolded_contig_66886	gi|358485511|ref|NC_006088.3|GGA1	67.78	807	159	21	520	1267	8351959	8352723	4e-73	280	1	S
SMAC_Scaffolded_contig_122042	gi|358485511|ref|NC_006088.3|GGA1	72.02	2405	492	57	180	2513	8355624	8353330	0	1209	2	S
SMAC_Scaffolded_contig_119842	gi|358485511|ref|NC_006088.3|GGA1	76.57	461	76	9	3	436	8356416	8355961	3e-89	333	1	S
SMAC_Scaffolded_contig_79268	gi|358485511|ref|NC_006088.3|GGA1	74.86	2458	421	52	13020	15384	8359146	8356793	0	1590	113	M
SMAC_Scaffolded_contig_79369	gi|358485511|ref|NC_006088.3|GGA1	74.62	1596	308	27	414	1966	8361231	8359690	0	1018	784	M
SMAC_Scaffolded_contig_160093	gi|358485511|ref|NC_006088.3|GGA1	70.94	898	221	13	5	875	8367751	8366867	1e-115	421	6525	M
SMAC_Scaffolded_contig_118022	gi|358485511|ref|NC_006088.3|GGA1	70.98	4197	891	82	5104	9135	8377747	8373713	0	2003	8	S
SMAC_Scaffolded_contig_159654	gi|358485511|ref|NC_006088.3|GGA1	81.55	916	141	7	2	915	8378378	8379267	0	884	2	S
SMAC_Scaffolded_contig_166526	gi|358485511|ref|NC_006088.3|GGA1	82.62	938	146	9	1420	2351	8386638	8385712	0	931	2	S
SMAC_Scaffolded_contig_52564	gi|358485511|ref|NC_006088.3|GGA1	69.51	4565	963	94	5924	10206	8407167	8402750	0	1920	5918	M
SMAC_Scaffolded_contig_110760	gi|358485511|ref|NC_006088.3|GGA1	74.32	1608	314	28	1140	2698	8412296	8410739	0	1002	4	S
SMAC_Scaffolded_contig_110761	gi|358485511|ref|NC_006088.3|GGA1	66.8	1232	280	32	253	1464	8413684	8414806	3e-94	351	1	S
SMAC_Scaffolded_contig_168740	gi|358485511|ref|NC_006088.3|GGA1	77.06	523	79	10	25	539	8415078	8415567	1e-107	394	1	S
SMAC_Scaffolded_contig_140420	gi|358485511|ref|NC_006088.3|GGA1	76.59	961	187	19	796	1739	8417655	8416716	0	668	2	S
SMAC_Scaffolded_contig_148413	gi|358485511|ref|NC_006088.3|GGA1	69.83	295	63	7	14	302	8419056	8418782	6e-26	123	1	S
SMAC_Scaffolded_contig_169128	gi|358485511|ref|NC_006088.3|GGA1	82.17	589	76	4	433	1020	8419963	8419403	1e-168	598	1	S
SMAC_Scaffolded_contig_175266	gi|358485511|ref|NC_006088.3|GGA1	66.37	1237	248	36	594	1702	8420792	8421988	2e-92	345	615	M
SMAC_Scaffolded_contig_170007	gi|358485511|ref|NC_006088.3|GGA1	75.97	129	31	0	23	151	8422894	8422766	5e-17	93	6626	M
SMAC_Scaffolded_contig_159843	gi|358485511|ref|NC_006088.3|GGA1	68.91	1354	328	31	4657	5968	8424068	8422766	7e-135	488	2	S
SMAC_Scaffolded_contig_176791	gi|358485511|ref|NC_006088.3|GGA1	88.24	34	1	1	481	511	8429174	8429207	0.069	42	33	M
SMAC_Scaffolded_contig_100915	gi|358485511|ref|NC_006088.3|GGA1	71.75	2057	370	45	820	2741	8432520	8430540	0	1077	3	S
SMAC_Scaffolded_contig_169927	gi|358485511|ref|NC_006088.3|GGA1	86.56	625	80	3	25	649	8438610	8437990	0	738	1	S
SMAC_Scaffolded_contig_14368	gi|358485511|ref|NC_006088.3|GGA1	71.51	5044	1017	106	5148	10008	8450805	8445999	0	2518	14	M
SMAC_Scaffolded_contig_134080	gi|358485511|ref|NC_006088.3|GGA1	74.36	429	58	7	537	931	8451543	8451133	4e-77	293	1	S
SMAC_Scaffolded_contig_73038	gi|358485511|ref|NC_006088.3|GGA1	76.34	2629	476	44	345	2900	8468471	8465916	0	1871	5	S
SMAC_Scaffolded_contig_45224	gi|358485511|ref|NC_006088.3|GGA1	71.64	3540	703	79	4284	7665	8469182	8472578	0	1773	8	S
SMAC_Scaffolded_contig_12922	gi|358485511|ref|NC_006088.3|GGA1	74.07	2214	364	48	5100	7246	8485228	8487298	0	1379	3	S
SMAC_Scaffolded_contig_117471	gi|358485511|ref|NC_006088.3|GGA1	72.71	502	117	6	9	509	8487865	8487383	7e-73	279	1	S
SMAC_Scaffolded_contig_101490	gi|358485511|ref|NC_006088.3|GGA1	77.84	1796	316	20	2251	4021	8489988	8491726	0	1429	1903	M
SMAC_Scaffolded_contig_174296	gi|358485511|ref|NC_006088.3|GGA1	76.95	282	54	3	258	533	8494017	8493741	7e-53	212	1	S
SMAC_Scaffolded_contig_142494	gi|358485511|ref|NC_006088.3|GGA1	87.49	983	107	7	1	975	8498338	8499312	0	1202	312	M
SMAC_Scaffolded_contig_187670	gi|358485511|ref|NC_006088.3|GGA1	83.17	309	38	2	364	658	8509498	8509190	1e-87	327	2	M
SMAC_Scaffolded_contig_34508	gi|358485511|ref|NC_006088.3|GGA1	76.3	3089	581	49	17955	20976	8513949	8516953	0	2186	623	M
SMAC_Scaffolded_contig_36590	gi|358485511|ref|NC_006088.3|GGA1	71.22	5208	963	115	3968	8883	8523262	8528225	0	2612	4	S
SMAC_Scaffolded_contig_164488	gi|358485511|ref|NC_006088.3|GGA1	88.61	711	70	8	11	719	8529364	8530065	0	892	1	S
SMAC_Scaffolded_contig_122627	gi|358485511|ref|NC_006088.3|GGA1	71.83	1349	259	30	1124	2421	8532429	8531151	0	693	11148	M
SMAC_Scaffolded_contig_140553	gi|358485511|ref|NC_006088.3|GGA1	77.33	75	17	0	937	1011	8534553	8534479	2e-06	59	42	M
SMAC_Scaffolded_contig_184338	gi|358485511|ref|NC_006088.3|GGA1	77.83	415	80	7	158	564	8535224	8534814	5e-83	313	1	S
SMAC_Scaffolded_contig_161418	gi|358485511|ref|NC_006088.3|GGA1	75.17	592	108	15	36	621	8547067	8546509	1e-100	372	1	S
SMAC_Scaffolded_contig_154168	gi|358485511|ref|NC_006088.3|GGA1	67.74	217	49	5	45	259	8548584	8548781	6e-11	73	59	M
SMAC_Scaffolded_contig_13223	gi|358485511|ref|NC_006088.3|GGA1	76.87	3792	690	47	26787	30461	8561323	8565044	0	2841	66	M
SMAC_Scaffolded_contig_99412	gi|358485511|ref|NC_006088.3|GGA1	80.27	1961	325	20	4	1924	8561760	8563698	0	1757	1	S
SMAC_Scaffolded_contig_191410	gi|358485511|ref|NC_006088.3|GGA1	75.8	595	122	12	38	630	8574522	8573948	1e-106	390	1	S
SMAC_Scaffolded_contig_143274	gi|358485511|ref|NC_006088.3|GGA1	74.78	115	29	0	451	565	8574873	8574759	4e-12	77	40	M
SMAC_Scaffolded_contig_142140	gi|358485511|ref|NC_006088.3|GGA1	76.54	456	90	4	383	837	8581499	8581938	1e-90	338	1	S
SMAC_Scaffolded_contig_157759	gi|358485511|ref|NC_006088.3|GGA1	74.97	919	164	19	1963	2838	8583190	8584085	3e-167	594	3	S
SMAC_Scaffolded_contig_169306	gi|358485511|ref|NC_006088.3|GGA1	80.3	66	10	2	945	1010	8586285	8586223	2e-05	55	71	M
SMAC_Scaffolded_contig_164017	gi|358485511|ref|NC_006088.3|GGA1	76.31	3069	541	54	460	3424	8587133	8590119	0	2194	2	S
SMAC_Scaffolded_contig_181514	gi|358485511|ref|NC_006088.3|GGA1	90.32	31	3	0	51	81	8587895	8587865	0.077	42	39	M
SMAC_Scaffolded_contig_131977	gi|358485511|ref|NC_006088.3|GGA1	77.11	948	164	11	4533	5452	8591488	8590566	0	733	1	S
SMAC_Scaffolded_contig_162078	gi|358485511|ref|NC_006088.3|GGA1	71.88	864	131	22	5	837	8593391	8592609	1e-128	464	1	S
SMAC_Scaffolded_contig_176455	gi|358485511|ref|NC_006088.3|GGA1	69.41	219	54	2	47	260	8595718	8595928	3e-18	96	69	M
SMAC_Scaffolded_contig_88744	gi|358485511|ref|NC_006088.3|GGA1	73.77	2787	548	56	1579	4289	8596526	8599205	0	1644	20971	M
SMAC_Scaffolded_contig_167260	gi|358485511|ref|NC_006088.3|GGA1	74.9	259	49	7	22	276	8604435	8604681	2e-36	158	1	S
SMAC_Scaffolded_contig_95544	gi|358485511|ref|NC_006088.3|GGA1	73.27	1444	261	18	315	1683	8608569	8609962	0	895	3	S
SMAC_Scaffolded_contig_21043	gi|358485511|ref|NC_006088.3|GGA1	74.18	1940	356	46	11046	12894	8613490	8615375	0	1164	10	S
SMAC_Scaffolded_contig_103467	gi|358485511|ref|NC_006088.3|GGA1	71.91	1139	228	27	1	1084	8614046	8615147	4e-161	572	1	S
SMAC_Scaffolded_contig_133566	gi|358485511|ref|NC_006088.3|GGA1	74.28	1046	213	17	4504	5511	8620368	8621395	0	648	2	S
SMAC_Scaffolded_contig_123592	gi|358485511|ref|NC_006088.3|GGA1	80.26	233	43	1	3	232	8624080	8624312	8e-53	212	2	S
SMAC_Scaffolded_contig_114460	gi|358485511|ref|NC_006088.3|GGA1	87.18	39	5	0	767	805	8624875	8624837	0.004	48	666	M
SMAC_Scaffolded_contig_148159	gi|358485511|ref|NC_006088.3|GGA1	64.54	674	140	18	266	879	8625296	8624662	4e-33	147	1	S
SMAC_Scaffolded_contig_103261	gi|358485511|ref|NC_006088.3|GGA1	76.24	2437	407	49	967	3327	8628325	8630665	0	1719	2	S
SMAC_Scaffolded_contig_103262	gi|358485511|ref|NC_006088.3|GGA1	77.49	622	105	13	2	597	8628338	8627726	7e-129	464	1	S
SMAC_Scaffolded_contig_90259	gi|358485511|ref|NC_006088.3|GGA1	80.08	1742	247	18	523	2234	8632705	8634376	0	1586	1531	M
SMAC_Scaffolded_contig_176229	gi|358485511|ref|NC_006088.3|GGA1	75.89	506	82	11	8	485	8634262	8634755	6e-94	349	2250	M
SMAC_Scaffolded_contig_67883	gi|358485511|ref|NC_006088.3|GGA1	67.49	443	110	9	147	580	8635009	8635426	5e-31	140	34420	M
SMAC_Scaffolded_contig_28061	gi|358485511|ref|NC_006088.3|GGA1	76.19	3184	534	42	50	3137	8635010	8631955	0	2338	2	S
SMAC_Scaffolded_contig_106177	gi|358485511|ref|NC_006088.3|GGA1	68.31	2155	430	57	46	2099	8638528	8636526	0	778	1	S
SMAC_Scaffolded_contig_29494	gi|358485511|ref|NC_006088.3|GGA1	75.16	4916	860	81	1564	6335	8640004	8644702	0	3321	1773	M
SMAC_Scaffolded_contig_99172	gi|358485511|ref|NC_006088.3|GGA1	79.95	2723	385	43	41	2682	8649947	8652589	0	2401	1	S
SMAC_Scaffolded_contig_18523	gi|358485511|ref|NC_006088.3|GGA1	71.05	3876	833	66	5381	9141	8663454	8659753	0	1894	10	S
SMAC_Scaffolded_contig_183058	gi|358485511|ref|NC_006088.3|GGA1	80.84	334	37	3	1	333	8670427	8670734	6e-87	325	2	S
SMAC_Scaffolded_contig_30412	gi|358485511|ref|NC_006088.3|GGA1	74.5	5228	958	105	1	5092	8687586	8692574	0	3283	9	S
SMAC_Scaffolded_contig_88340	gi|358485511|ref|NC_006088.3|GGA1	77.41	5211	839	85	31	5058	8687616	8682561	0	4013	11	S
SMAC_Scaffolded_contig_142379	gi|358485511|ref|NC_006088.3|GGA1	74.79	1829	326	30	175	1977	8696846	8698565	0	1207	2	S
SMAC_Scaffolded_contig_148862	gi|358485511|ref|NC_006088.3|GGA1	71.31	1607	286	38	1204	2709	8707731	8709263	0	807	9333	M
SMAC_Scaffolded_contig_13683	gi|358485511|ref|NC_006088.3|GGA1	72.9	3181	628	61	5456	8540	8716290	8713248	0	1786	7	S
SMAC_Scaffolded_contig_28218	gi|358485511|ref|NC_006088.3|GGA1	75.53	3789	697	66	38	3714	8727459	8723789	0	2563	1	S
SMAC_Scaffolded_contig_178829	gi|358485511|ref|NC_006088.3|GGA1	75.98	637	97	14	7	637	8732488	8733074	2e-123	446	1	S
SMAC_Scaffolded_contig_144609	gi|358485511|ref|NC_006088.3|GGA1	70.56	1379	283	27	5232	6549	8733116	8734432	0	652	9	S
SMAC_Scaffolded_contig_113553	gi|358485511|ref|NC_006088.3|GGA1	75.89	3078	557	58	3463	6438	8746112	8743118	0	2111	4	S
SMAC_Scaffolded_contig_36473	gi|358485511|ref|NC_006088.3|GGA1	78.28	3075	464	46	8549	11498	8755106	8752111	0	2511	12	M
SMAC_Scaffolded_contig_73041	gi|358485511|ref|NC_006088.3|GGA1	73.05	898	202	10	93	979	8757681	8756813	3e-145	520	1277	M
SMAC_Scaffolded_contig_155001	gi|358485511|ref|NC_006088.3|GGA1	96.15	26	1	0	490	515	8758924	8758949	0.094	42	40	M
SMAC_Scaffolded_contig_153739	gi|358485511|ref|NC_006088.3|GGA1	76.98	1286	239	22	19	1296	8762921	8764157	0	937	1	S
SMAC_Scaffolded_contig_160169	gi|358485511|ref|NC_006088.3|GGA1	77.3	1564	271	24	1	1526	8765329	8766846	0	1187	3	S
SMAC_Scaffolded_contig_75680	gi|358485511|ref|NC_006088.3|GGA1	75.03	4634	760	94	10600	15096	8775995	8771622	0	3076	9	S
SMAC_Scaffolded_contig_183201	gi|358485511|ref|NC_006088.3|GGA1	74.61	772	138	22	1	756	8786851	8786122	3e-128	462	1	S
SMAC_Scaffolded_contig_39394	gi|358485511|ref|NC_006088.3|GGA1	74.88	3241	581	58	5471	8577	8788030	8791171	0	2123	38	M
SMAC_Scaffolded_contig_182581	gi|358485511|ref|NC_006088.3|GGA1	66.33	493	92	10	1	471	8797986	8798426	3e-38	163	1	S
SMAC_Scaffolded_contig_144536	gi|358485511|ref|NC_006088.3|GGA1	74.66	521	96	8	5313	5801	8799641	8799125	6e-91	342	1	S
SMAC_Scaffolded_contig_176568	gi|358485511|ref|NC_006088.3|GGA1	82.69	335	53	1	8	342	8806416	8806087	2e-92	343	2	S
SMAC_Scaffolded_contig_121725	gi|358485511|ref|NC_006088.3|GGA1	74.43	1228	234	18	5	1189	8810270	8809080	0	791	1	S
SMAC_Scaffolded_contig_33263	gi|358485511|ref|NC_006088.3|GGA1	74.14	4458	820	69	537	4837	8813361	8809080	0	2830	7	S
SMAC_Scaffolded_contig_172763	gi|358485511|ref|NC_006088.3|GGA1	82.71	214	34	2	389	600	8814046	8813834	2e-53	214	3	S
SMAC_Scaffolded_contig_33742	gi|358485511|ref|NC_006088.3|GGA1	77.67	2767	494	40	16399	19119	8823489	8826177	0	2136	733	M
SMAC_Scaffolded_contig_184916	gi|358485511|ref|NC_006088.3|GGA1	71.12	329	64	9	4545	4869	8827321	8827020	6e-34	152	2	S
SMAC_Scaffolded_contig_106801	gi|358485511|ref|NC_006088.3|GGA1	80.17	691	111	4	2211	2888	8833415	8834092	4e-179	634	3	S
SMAC_Scaffolded_contig_178457	gi|358485511|ref|NC_006088.3|GGA1	69.4	402	82	10	685	1054	8834403	8834011	6e-38	163	1	S
SMAC_Scaffolded_contig_172238	gi|358485511|ref|NC_006088.3|GGA1	64.55	1010	212	28	41	1019	8839851	8838957	4e-53	214	1	S
SMAC_Scaffolded_contig_119826	gi|358485511|ref|NC_006088.3|GGA1	74.92	1284	220	27	51	1287	8841015	8839787	0	834	1	S
SMAC_Scaffolded_contig_98247	gi|358485511|ref|NC_006088.3|GGA1	81.42	1421	178	19	20	1382	8853643	8852251	0	1364	2	S
SMAC_Scaffolded_contig_86786	gi|358485511|ref|NC_006088.3|GGA1	78.88	3262	515	56	2525	5687	8853686	8850500	0	2681	316	M
SMAC_Scaffolded_contig_135204	gi|358485511|ref|NC_006088.3|GGA1	93.55	31	2	0	52	82	8853937	8853967	0.002	48	285	M
SMAC_Scaffolded_contig_109824	gi|358485511|ref|NC_006088.3|GGA1	72.96	921	183	18	2229	3109	8858929	8859823	9e-144	517	26	M
SMAC_Scaffolded_contig_112312	gi|358485511|ref|NC_006088.3|GGA1	73.57	2947	546	62	6667	9548	8864830	8862052	0	1734	5	S
SMAC_Scaffolded_contig_131144	gi|358485511|ref|NC_006088.3|GGA1	68.6	1118	251	27	160	1238	8873586	8872530	5e-110	403	1	S
SMAC_Scaffolded_contig_81943	gi|358485511|ref|NC_006088.3|GGA1	71.5	835	170	22	209	1019	8875617	8876407	2e-107	396	3	S
SMAC_Scaffolded_contig_102834	gi|358485511|ref|NC_006088.3|GGA1	73.19	1037	213	18	1	1026	8881872	8880890	1e-167	594	2	S
SMAC_Scaffolded_contig_137697	gi|358485511|ref|NC_006088.3|GGA1	71.99	507	96	11	30	526	8897080	8897550	1e-68	266	1	S
SMAC_Scaffolded_contig_44182	gi|358485511|ref|NC_006088.3|GGA1	68.76	3416	714	71	30915	34206	8903691	8900505	0	1348	20	S
SMAC_Scaffolded_contig_149956	gi|358485511|ref|NC_006088.3|GGA1	71.27	637	146	11	7	626	8912530	8913146	4e-82	309	1	S
SMAC_Scaffolded_contig_22384	gi|358485511|ref|NC_006088.3|GGA1	74.05	2979	567	56	257	3120	8941763	8944650	0	1820	427	M
SMAC_Scaffolded_contig_127483	gi|358485511|ref|NC_006088.3|GGA1	75.83	1601	244	37	2737	4283	8951022	8949511	0	1106	3634	M
SMAC_Scaffolded_contig_141813	gi|358485511|ref|NC_006088.3|GGA1	69.9	804	180	18	38	794	8951085	8951873	1e-89	334	1	S
SMAC_Scaffolded_contig_167606	gi|358485511|ref|NC_006088.3|GGA1	92.86	28	2	0	234	261	8959219	8959192	0.076	42	37	M
SMAC_Scaffolded_contig_55083	gi|358485511|ref|NC_006088.3|GGA1	71.73	5327	1052	102	475	5575	8964235	8959137	0	2767	8	M
SMAC_Scaffolded_contig_14286	gi|358485511|ref|NC_006088.3|GGA1	76.9	3074	516	50	47	3057	8965257	8968199	0	2293	13	S
SMAC_Scaffolded_contig_12837	gi|358485511|ref|NC_006088.3|GGA1	71.49	2143	433	46	867	2917	8969517	8971573	0	1063	2	S
SMAC_Scaffolded_contig_129781	gi|358485511|ref|NC_006088.3|GGA1	81.94	897	132	9	1	889	9000256	8999382	0	874	11	M
SMAC_Scaffolded_contig_79236	gi|358485511|ref|NC_006088.3|GGA1	67.44	4386	954	117	874	5029	9004380	9000239	0	1371	3	M
SMAC_Scaffolded_contig_52601	gi|358485511|ref|NC_006088.3|GGA1	75.38	4610	800	67	3	4399	9012481	9007994	0	3196	1	S
SMAC_Scaffolded_contig_52602	gi|358485511|ref|NC_006088.3|GGA1	69.55	2621	567	65	1486	4026	9013463	9015932	0	1045	4	S
SMAC_Scaffolded_contig_164193	gi|358485511|ref|NC_006088.3|GGA1	71.34	492	106	11	340	803	9016979	9017463	3e-59	233	1	S
SMAC_Scaffolded_contig_181241	gi|358485511|ref|NC_006088.3|GGA1	67.74	310	62	5	1673	1982	9019296	9019567	1e-24	120	13	M
SMAC_Scaffolded_contig_164293	gi|358485511|ref|NC_006088.3|GGA1	73.4	312	62	7	1	304	9019345	9019047	2e-41	176	1	S
SMAC_Scaffolded_contig_124535	gi|358485511|ref|NC_006088.3|GGA1	79.02	591	93	11	21	588	9024783	9025365	4e-135	486	1	S
SMAC_Scaffolded_contig_24855	gi|358485511|ref|NC_006088.3|GGA1	74.03	4097	779	77	1977	5989	9036965	9033070	0	2502	8	S
SMAC_Scaffolded_contig_174230	gi|358485511|ref|NC_006088.3|GGA1	71.21	455	102	6	158	598	9039196	9038757	3e-58	230	1	S
SMAC_Scaffolded_contig_113357	gi|358485511|ref|NC_006088.3|GGA1	80.58	381	73	1	1105	1485	9040827	9040448	8e-94	351	2	S
SMAC_Scaffolded_contig_20504	gi|358485511|ref|NC_006088.3|GGA1	93.1	29	2	0	4583	4611	9047139	9047111	0.2	44	7	M
SMAC_Scaffolded_contig_64204	gi|358485511|ref|NC_006088.3|GGA1	72.28	2659	504	52	6003	8571	9064037	9061522	0	1449	25123	M
SMAC_Scaffolded_contig_167928	gi|358485511|ref|NC_006088.3|GGA1	74.44	356	72	6	2	349	9066795	9066451	1e-55	223	2	S
SMAC_Scaffolded_contig_157116	gi|358485511|ref|NC_006088.3|GGA1	69.12	1927	403	53	5275	7092	9070144	9068301	0	728	3	S
SMAC_Scaffolded_contig_157919	gi|358485511|ref|NC_006088.3|GGA1	68.97	651	121	15	25	665	9070603	9071182	4e-70	269	1	S
SMAC_Scaffolded_contig_41184	gi|358485511|ref|NC_006088.3|GGA1	73.34	2416	457	42	3897	6219	9075571	9073250	0	1433	3	S
SMAC_Scaffolded_contig_14116	gi|358485511|ref|NC_006088.3|GGA1	77.65	1973	341	28	12947	14861	9088839	9090769	0	1534	2696	M
SMAC_Scaffolded_contig_165378	gi|358485511|ref|NC_006088.3|GGA1	69.91	432	117	8	76	503	9097067	9096645	1e-39	168	2	S
SMAC_Scaffolded_contig_170151	gi|358485511|ref|NC_006088.3|GGA1	77.48	151	27	5	682	830	9100508	9100653	4e-20	104	51	M
SMAC_Scaffolded_contig_62809	gi|358485511|ref|NC_006088.3|GGA1	80.64	1188	197	14	936	2108	9101677	9100508	0	1072	2881	M
SMAC_Scaffolded_contig_164598	gi|358485511|ref|NC_006088.3|GGA1	85.45	220	26	3	3	217	9112023	9111805	2e-62	244	2	S
SMAC_Scaffolded_contig_107079	gi|358485511|ref|NC_006088.3|GGA1	69.04	1757	401	36	884	2604	9125687	9124038	0	682	2	S
SMAC_Scaffolded_contig_74157	gi|358485511|ref|NC_006088.3|GGA1	70.86	1383	303	25	123	1434	9127795	9126442	0	655	1	S
SMAC_Scaffolded_contig_141151	gi|358485511|ref|NC_006088.3|GGA1	71.59	1408	272	32	40	1393	9132313	9133646	0	708	1	S
SMAC_Scaffolded_contig_30074	gi|358485511|ref|NC_006088.3|GGA1	70.44	2656	557	66	9366	11942	9137659	9140165	0	1159	62	M
SMAC_Scaffolded_contig_6725	gi|358485511|ref|NC_006088.3|GGA1	68.52	1582	337	36	98	1642	9141031	9142488	3e-166	590	9	M
SMAC_Scaffolded_contig_188375	gi|358485511|ref|NC_006088.3|GGA1	75.13	575	95	13	16	589	9145296	9145823	8e-103	378	1	S
SMAC_Scaffolded_contig_63652	gi|358485511|ref|NC_006088.3|GGA1	78.48	2054	292	39	5478	7484	9145751	9143801	0	1671	5	S
SMAC_Scaffolded_contig_93647	gi|358485511|ref|NC_006088.3|GGA1	66.67	237	57	3	1060	1290	9148719	9148499	2e-12	78	123	M
SMAC_Scaffolded_contig_14675	gi|358485511|ref|NC_006088.3|GGA1	77.73	2088	364	34	6610	8640	9159413	9161456	0	1608	18	S
SMAC_Scaffolded_contig_102042	gi|358485511|ref|NC_006088.3|GGA1	70.14	278	81	2	625	901	9167321	9167597	3e-24	120	2	S
SMAC_Scaffolded_contig_80972	gi|358485511|ref|NC_006088.3|GGA1	73.26	273	71	2	198	469	9167326	9167597	7e-36	156	21	M
SMAC_Scaffolded_contig_143285	gi|358485511|ref|NC_006088.3|GGA1	76.17	193	45	1	135	327	9167406	9167597	2e-30	138	11	M
SMAC_Scaffolded_contig_28635	gi|358485511|ref|NC_006088.3|GGA1	70.3	202	60	0	214	415	9167455	9167656	1e-17	95	73	M
SMAC_Scaffolded_contig_111885	gi|358485511|ref|NC_006088.3|GGA1	74.15	205	53	0	57	261	9167534	9167330	4e-28	131	5	M
SMAC_Scaffolded_contig_34564	gi|358485511|ref|NC_006088.3|GGA1	73.17	328	88	0	2011	2338	9167657	9167330	3e-47	196	37	M
SMAC_Scaffolded_contig_82270	gi|358485511|ref|NC_006088.3|GGA1	69.6	329	71	3	2097	2425	9167657	9167358	2e-35	156	6	M
SMAC_Scaffolded_contig_99378	gi|358485511|ref|NC_006088.3|GGA1	71.56	225	49	4	269	478	9167657	9167433	7e-23	113	3	S
SMAC_Scaffolded_contig_85275	gi|358485511|ref|NC_006088.3|GGA1	77.03	74	17	0	118	191	9167662	9167735	4e-06	57	12	M
SMAC_Scaffolded_contig_51048	gi|358485511|ref|NC_006088.3|GGA1	72.88	236	64	0	1279	1514	9167678	9167443	4e-30	138	11	M
SMAC_Scaffolded_contig_118305	gi|358485511|ref|NC_006088.3|GGA1	70.78	1126	201	31	1	1074	9170424	9169375	2e-147	527	2	S
SMAC_Scaffolded_contig_97668	gi|358485511|ref|NC_006088.3|GGA1	67.15	1367	292	49	819	2148	9185201	9183955	4e-97	361	2	S
SMAC_Scaffolded_contig_95127	gi|358485511|ref|NC_006088.3|GGA1	78.17	820	156	12	277	1082	9186466	9187276	0	639	159	M
SMAC_Scaffolded_contig_146616	gi|358485511|ref|NC_006088.3|GGA1	67.25	287	69	10	16	289	9195091	9195365	3e-10	71	78	M
SMAC_Scaffolded_contig_14847	gi|358485511|ref|NC_006088.3|GGA1	67.44	5774	1246	161	7620	13127	9205351	9199946	0	1783	2277	M
SMAC_Scaffolded_contig_72220	gi|358485511|ref|NC_006088.3|GGA1	69.07	1898	393	70	2353	4149	9211387	9213191	2e-179	636	3	S
SMAC_Scaffolded_contig_119634	gi|358485511|ref|NC_006088.3|GGA1	96	25	1	0	158	182	9213200	9213224	0.22	41	57	M
SMAC_Scaffolded_contig_145441	gi|358485511|ref|NC_006088.3|GGA1	69.25	1135	238	33	1708	2801	9216990	9215926	3e-116	425	2	S
SMAC_Scaffolded_contig_171337	gi|358485511|ref|NC_006088.3|GGA1	67.94	889	222	19	96	971	9219727	9218889	3e-75	289	3	M
SMAC_Scaffolded_contig_52052	gi|358485511|ref|NC_006088.3|GGA1	71.45	2655	529	48	16156	18726	9232775	9230266	0	1361	519	M
SMAC_Scaffolded_contig_98844	gi|358485511|ref|NC_006088.3|GGA1	74.13	893	182	17	542	1394	9238987	9238104	4e-150	536	1	S
SMAC_Scaffolded_contig_94529	gi|358485511|ref|NC_006088.3|GGA1	71.95	2182	477	45	2405	4514	9246761	9244643	0	1095	5	S
SMAC_Scaffolded_contig_170326	gi|358485511|ref|NC_006088.3|GGA1	71.44	956	191	22	372	1283	9253067	9252150	3e-129	468	4	S
SMAC_Scaffolded_contig_169824	gi|358485511|ref|NC_006088.3|GGA1	78.87	388	67	7	1217	1600	9255096	9254720	9e-83	313	11	M
SMAC_Scaffolded_contig_172192	gi|358485511|ref|NC_006088.3|GGA1	67.6	1435	301	45	78	1457	9257716	9256391	3e-120	437	1	S
SMAC_Scaffolded_contig_175662	gi|358485511|ref|NC_006088.3|GGA1	75.74	404	83	6	183	575	9265788	9265389	2e-71	273	1	S
SMAC_Scaffolded_contig_76852	gi|358485511|ref|NC_006088.3|GGA1	73.44	497	86	8	110	594	9269761	9269299	2e-81	307	1	S
SMAC_Scaffolded_contig_17881	gi|358485511|ref|NC_006088.3|GGA1	78.31	1005	183	15	23213	24200	9273442	9272456	0	794	3289	M
SMAC_Scaffolded_contig_179920	gi|358485511|ref|NC_006088.3|GGA1	71.43	217	54	3	6	215	9274914	9274699	8e-21	105	1	S
SMAC_Scaffolded_contig_192059	gi|358485511|ref|NC_006088.3|GGA1	91.43	35	2	1	473	507	9278531	9278498	0.007	46	97	M
SMAC_Scaffolded_contig_192061	gi|358485511|ref|NC_006088.3|GGA1	93.1	29	1	1	185	212	9290003	9289975	1.1	41	7	M
SMAC_Scaffolded_contig_101516	gi|358485511|ref|NC_006088.3|GGA1	70.98	610	125	8	1982	2570	9296066	9295488	1e-82	313	1	S
SMAC_Scaffolded_contig_153745	gi|358485511|ref|NC_006088.3|GGA1	70.04	671	137	15	4364	4995	9296199	9296844	7e-77	295	1	S
SMAC_Scaffolded_contig_117323	gi|358485511|ref|NC_006088.3|GGA1	69.93	6093	1258	141	3333	9194	9302046	9307795	0	2610	22	M
SMAC_Scaffolded_contig_129752	gi|358485511|ref|NC_006088.3|GGA1	94.29	35	1	1	1	34	9310570	9310604	0.0002	51	65	M
SMAC_Scaffolded_contig_4262	gi|358485511|ref|NC_006088.3|GGA1	67.22	668	150	18	309	952	9315584	9314962	1e-48	199	1	S
SMAC_Scaffolded_contig_84206	gi|358485511|ref|NC_006088.3|GGA1	75.15	1968	350	39	15	1898	9321910	9319998	0	1294	1	S
SMAC_Scaffolded_contig_84205	gi|358485511|ref|NC_006088.3|GGA1	71.83	2464	510	56	5740	8090	9321926	9324318	0	1229	4	S
SMAC_Scaffolded_contig_69233	gi|358485511|ref|NC_006088.3|GGA1	76.09	5068	897	83	2474	7463	9330296	9325466	0	3586	3	S
SMAC_Scaffolded_contig_69234	gi|358485511|ref|NC_006088.3|GGA1	73.3	1221	228	22	5	1172	9331008	9332183	0	722	1	S
SMAC_Scaffolded_contig_130451	gi|358485511|ref|NC_006088.3|GGA1	79.75	553	101	8	1	551	9332993	9333536	3e-128	466	3	S
SMAC_Scaffolded_contig_132625	gi|358485511|ref|NC_006088.3|GGA1	77.15	1663	260	28	323	1918	9333937	9335546	0	1269	2	S
SMAC_Scaffolded_contig_51552	gi|358485511|ref|NC_006088.3|GGA1	69.57	1022	180	30	1296	2235	9339482	9338510	3e-116	425	2	S
SMAC_Scaffolded_contig_65159	gi|358485511|ref|NC_006088.3|GGA1	71.24	2490	533	46	5101	7488	9341079	9343487	0	1220	966	M
SMAC_Scaffolded_contig_175728	gi|358485511|ref|NC_006088.3|GGA1	76.95	590	97	10	1	572	9357663	9357095	8e-122	441	1	S
SMAC_Scaffolded_contig_65158	gi|358485511|ref|NC_006088.3|GGA1	71.45	1128	184	33	2439	3447	9362948	9361840	1e-155	558	8	S
SMAC_Scaffolded_contig_135090	gi|358485511|ref|NC_006088.3|GGA1	76.5	698	120	10	4437	5104	9366916	9366233	4e-143	515	5	M
SMAC_Scaffolded_contig_150488	gi|358485511|ref|NC_006088.3|GGA1	66.5	1200	208	41	373	1464	9369509	9368396	2e-91	342	1	S
[truncated: 190,831 more rows]

## Sheet: SMACv1.1_ScaffoldedvsZebraFinch
Query	Hit/Subject Chromosome (Zebra Finch, T. guttata, 3.2.4)	% Identity	Align Length	Mismatches	Gaps	q-start	q-end	hit-start	hit-end	evalue	bitscore	Total hits	Single or Multi Chromosome
SMAC_Scaffolded_contig_75785	gi|224381666|ref|NC_011462.1|NC_011462_TGU1	78.18	220	31	5	3505	3716	233	443	2e-40	174	1	S
SMAC_Scaffolded_contig_64543	gi|224381666|ref|NC_011462.1|NC_011462_TGU1	81.63	49	8	1	164	212	10073	10026	0.022	44	21	M
SMAC_Scaffolded_contig_18378	gi|224381666|ref|NC_011462.1|NC_011462_TGU1	80	2255	292	38	10664	12848	21036	23201	0	2006	15	S
SMAC_Scaffolded_contig_35828	gi|224381666|ref|NC_011462.1|NC_011462_TGU1	72.32	112	31	0	1275	1386	32387	32276	3e-07	62	52	M
SMAC_Scaffolded_contig_8382	gi|224381666|ref|NC_011462.1|NC_011462_TGU1	88.57	35	4	0	998	1032	34369	34403	0.018	46	91	M
SMAC_Scaffolded_contig_132557	gi|224381666|ref|NC_011462.1|NC_011462_TGU1	93.55	31	2	0	499	529	63304	63334	0.002	48	29	M
SMAC_Scaffolded_contig_133219	gi|224381666|ref|NC_011462.1|NC_011462_TGU1	76.42	229	52	2	544	772	69479	69253	5e-38	163	2	S
SMAC_Scaffolded_contig_98517	gi|224381666|ref|NC_011462.1|NC_011462_TGU1	83.33	678	88	10	979	1647	88972	88311	0	691	4	M
SMAC_Scaffolded_contig_23191	gi|224381666|ref|NC_011462.1|NC_011462_TGU1	70.88	522	93	17	2	487	99028	98530	1e-58	233	3	S
SMAC_Scaffolded_contig_25108	gi|224381666|ref|NC_011462.1|NC_011462_TGU1	69.91	1017	203	26	2358	3351	105581	104645	2e-117	430	3	S
SMAC_Scaffolded_contig_85831	gi|224381666|ref|NC_011462.1|NC_011462_TGU1	77.21	215	36	7	6	213	108671	108463	2e-33	147	1	S
SMAC_Scaffolded_contig_48063	gi|224381666|ref|NC_011462.1|NC_011462_TGU1	74.53	1437	257	30	9926	11334	111094	109739	0	904	431	M
SMAC_Scaffolded_contig_116169	gi|224381666|ref|NC_011462.1|NC_011462_TGU1	68.5	1400	293	32	701	2082	119768	118499	1e-146	526	1	S
SMAC_Scaffolded_contig_1798	gi|224381666|ref|NC_011462.1|NC_011462_TGU1	84.43	122	16	1	450	571	123062	122944	6e-29	132	1	S
SMAC_Scaffolded_contig_75898	gi|224381666|ref|NC_011462.1|NC_011462_TGU1	71.26	334	71	9	1994	2316	124616	124297	3e-34	152	1	S
SMAC_Scaffolded_contig_22725	gi|224381666|ref|NC_011462.1|NC_011462_TGU1	72.41	116	17	3	840	952	134246	134349	5e-08	66	99	M
SMAC_Scaffolded_contig_152458	gi|224381666|ref|NC_011462.1|NC_011462_TGU1	66.78	292	85	9	379	665	141142	141426	4e-06	60	11	M
SMAC_Scaffolded_contig_182801	gi|224381666|ref|NC_011462.1|NC_011462_TGU1	96.43	28	1	0	218	245	142917	142890	0.006	46	133	M
SMAC_Scaffolded_contig_89400	gi|224381666|ref|NC_011462.1|NC_011462_TGU1	76.29	97	22	1	1042	1137	145497	145401	4e-09	68	141	M
SMAC_Scaffolded_contig_162660	gi|224381666|ref|NC_011462.1|NC_011462_TGU1	72.82	504	96	14	28	511	148279	148761	4e-69	266	2	S
SMAC_Scaffolded_contig_52183	gi|224381666|ref|NC_011462.1|NC_011462_TGU1	75.17	1039	188	19	1482	2494	159446	158452	0	688	6	S
SMAC_Scaffolded_contig_75513	gi|224381666|ref|NC_011462.1|NC_011462_TGU1	100	26	0	0	108	133	161586	161561	0.002	48	94	M
SMAC_Scaffolded_contig_141799	gi|224381666|ref|NC_011462.1|NC_011462_TGU1	71.3	345	58	5	1	337	162738	163049	4e-46	190	2	M
SMAC_Scaffolded_contig_27416	gi|224381666|ref|NC_011462.1|NC_011462_TGU1	70.52	519	104	9	1241	1723	166892	166387	1e-63	250	1	S
SMAC_Scaffolded_contig_1819	gi|224381666|ref|NC_011462.1|NC_011462_TGU1	70.96	1319	247	34	9726	11003	174220	175443	4e-174	621	32	M
SMAC_Scaffolded_contig_72047	gi|224381666|ref|NC_011462.1|NC_011462_TGU1	67.93	396	71	10	60	447	206746	206399	9e-33	147	2	S
SMAC_Scaffolded_contig_1820	gi|224381666|ref|NC_011462.1|NC_011462_TGU1	73.14	309	58	7	2037	2342	215416	215130	2e-40	174	2	S
SMAC_Scaffolded_contig_57177	gi|224381666|ref|NC_011462.1|NC_011462_TGU1	87.8	123	14	1	1766	1888	216080	216201	9e-34	150	2	S
SMAC_Scaffolded_contig_172712	gi|224381666|ref|NC_011462.1|NC_011462_TGU1	71.67	240	46	8	450	678	217360	217588	3e-22	111	1	S
SMAC_Scaffolded_contig_85758	gi|224381666|ref|NC_011462.1|NC_011462_TGU1	100	33	0	0	1097	1129	222427	222395	7e-07	60	3808	M
SMAC_Scaffolded_contig_27427	gi|224381666|ref|NC_011462.1|NC_011462_TGU1	79.18	946	138	9	1306	2233	229300	230204	0	830	2	S
SMAC_Scaffolded_contig_27428	gi|224381666|ref|NC_011462.1|NC_011462_TGU1	65.28	265	50	5	143	403	231854	231628	3e-12	78	63	M
SMAC_Scaffolded_contig_74891	gi|224381666|ref|NC_011462.1|NC_011462_TGU1	72.09	86	14	2	6	90	233781	233857	0.002	48	43	M
SMAC_Scaffolded_contig_121006	gi|224381666|ref|NC_011462.1|NC_011462_TGU1	92.19	64	4	1	1051	1113	237750	237687	7e-15	89	1285	M
SMAC_Scaffolded_contig_37567	gi|224381666|ref|NC_011462.1|NC_011462_TGU1	72.38	956	129	22	12867	13812	240693	239863	8e-155	556	15	M
SMAC_Scaffolded_contig_43679	gi|224381666|ref|NC_011462.1|NC_011462_TGU1	67.45	851	144	19	885	1732	263239	262519	7e-85	320	2	S
SMAC_Scaffolded_contig_9419	gi|224381666|ref|NC_011462.1|NC_011462_TGU1	68.15	1758	316	41	11344	13072	263239	261697	0	681	7	S
SMAC_Scaffolded_contig_102745	gi|224381666|ref|NC_011462.1|NC_011462_TGU1	70.99	586	125	15	109	685	273584	273035	7e-68	264	2	S
SMAC_Scaffolded_contig_187651	gi|224381666|ref|NC_011462.1|NC_011462_TGU1	66.06	386	60	11	8	392	274309	273994	4e-25	120	63	M
SMAC_Scaffolded_contig_44933	gi|224381666|ref|NC_011462.1|NC_011462_TGU1	72.12	477	88	9	5136	5608	282657	283092	3e-66	260	4	S
SMAC_Scaffolded_contig_96760	gi|224381666|ref|NC_011462.1|NC_011462_TGU1	67.79	562	97	10	1714	2212	288509	287969	7e-57	228	5	S
SMAC_Scaffolded_contig_133051	gi|224381666|ref|NC_011462.1|NC_011462_TGU1	70.15	268	64	6	186	453	298067	298318	2e-22	111	123	M
SMAC_Scaffolded_contig_151244	gi|224381666|ref|NC_011462.1|NC_011462_TGU1	88.57	70	5	2	318	384	317754	317685	4e-14	84	2973	M
SMAC_Scaffolded_contig_20962	gi|224381666|ref|NC_011462.1|NC_011462_TGU1	69.03	1198	258	24	2466	3640	324475	323368	3e-133	482	5115	M
SMAC_Scaffolded_contig_67937	gi|224381666|ref|NC_011462.1|NC_011462_TGU1	70.9	1244	218	29	10025	11201	331694	330528	2e-171	610	4	M
SMAC_Scaffolded_contig_159830	gi|224381666|ref|NC_011462.1|NC_011462_TGU1	68.72	681	128	11	187	854	345067	344459	1e-77	295	2	S
SMAC_Scaffolded_contig_121181	gi|224381666|ref|NC_011462.1|NC_011462_TGU1	71.62	229	47	5	586	810	345963	345749	3e-23	114	1	S
SMAC_Scaffolded_contig_172102	gi|224381666|ref|NC_011462.1|NC_011462_TGU1	73.14	350	68	6	871	1207	349433	349097	3e-50	205	4	S
SMAC_Scaffolded_contig_143780	gi|224381666|ref|NC_011462.1|NC_011462_TGU1	70.34	617	124	19	30	632	351369	350798	3e-65	255	6	S
SMAC_Scaffolded_contig_23	gi|224381666|ref|NC_011462.1|NC_011462_TGU1	76.16	1057	191	18	8624	9667	356806	355798	0	744	9	S
SMAC_Scaffolded_contig_38263	gi|224381666|ref|NC_011462.1|NC_011462_TGU1	76.63	659	124	10	1918	2567	356806	356169	6e-132	477	1	S
SMAC_Scaffolded_contig_37864	gi|224381666|ref|NC_011462.1|NC_011462_TGU1	75.87	601	111	7	10275	10868	372240	371667	5e-117	430	4	M
SMAC_Scaffolded_contig_31310	gi|224381666|ref|NC_011462.1|NC_011462_TGU1	74.41	426	79	13	2673	3090	383003	382600	5e-62	246	6	S
SMAC_Scaffolded_contig_135764	gi|224381666|ref|NC_011462.1|NC_011462_TGU1	74.96	567	95	11	2580	3106	387450	388009	2e-101	376	6	M
SMAC_Scaffolded_contig_43828	gi|224381666|ref|NC_011462.1|NC_011462_TGU1	71.64	1132	219	21	8383	9476	395234	396301	5e-166	592	146	M
SMAC_Scaffolded_contig_32969	gi|224381666|ref|NC_011462.1|NC_011462_TGU1	76.14	1094	173	20	2713	3798	399205	400218	0	785	2767	M
SMAC_Scaffolded_contig_25536	gi|224381666|ref|NC_011462.1|NC_011462_TGU1	73.48	1282	222	35	452	1693	418747	419950	0	729	7	M
SMAC_Scaffolded_contig_48383	gi|224381666|ref|NC_011462.1|NC_011462_TGU1	81.26	603	83	11	670	1256	434412	435000	6e-155	556	19	M
SMAC_Scaffolded_contig_124182	gi|224381666|ref|NC_011462.1|NC_011462_TGU1	71.79	599	119	10	34	621	437637	437078	4e-84	318	5	M
SMAC_Scaffolded_contig_41094	gi|224381666|ref|NC_011462.1|NC_011462_TGU1	76.98	1664	273	28	7320	8948	464649	466237	0	1247	15	M
SMAC_Scaffolded_contig_88676	gi|224381666|ref|NC_011462.1|NC_011462_TGU1	78.7	878	129	15	308	1174	470164	470994	0	726	3	M
SMAC_Scaffolded_contig_52561	gi|224381666|ref|NC_011462.1|NC_011462_TGU1	66.83	1260	243	36	3456	4685	479957	481071	2e-103	383	2	S
SMAC_Scaffolded_contig_83920	gi|224381666|ref|NC_011462.1|NC_011462_TGU1	67.27	385	94	15	309	666	485195	484816	7e-15	87	62	M
SMAC_Scaffolded_contig_48456	gi|224381666|ref|NC_011462.1|NC_011462_TGU1	72.7	1736	304	39	11030	12734	492840	494436	0	971	57	M
SMAC_Scaffolded_contig_87292	gi|224381666|ref|NC_011462.1|NC_011462_TGU1	74.87	748	132	13	4493	5234	508010	507313	3e-136	493	13	M
SMAC_Scaffolded_contig_155285	gi|224381666|ref|NC_011462.1|NC_011462_TGU1	74.18	1034	227	14	557	1585	510325	509327	3e-179	634	4	M
SMAC_Scaffolded_contig_44889	gi|224381666|ref|NC_011462.1|NC_011462_TGU1	72.22	306	52	6	77	381	513639	513912	8e-41	172	2	M
SMAC_Scaffolded_contig_150300	gi|224381666|ref|NC_011462.1|NC_011462_TGU1	81.56	347	60	3	1705	2049	516652	516996	5e-87	327	2	S
SMAC_Scaffolded_contig_44888	gi|224381666|ref|NC_011462.1|NC_011462_TGU1	67.73	2234	403	59	5836	7933	522578	520527	0	800	1150	M
SMAC_Scaffolded_contig_66582	gi|224381666|ref|NC_011462.1|NC_011462_TGU1	81.14	1824	280	19	14247	16060	533078	531309	0	1710	455	M
SMAC_Scaffolded_contig_106505	gi|224381666|ref|NC_011462.1|NC_011462_TGU1	85.25	644	80	4	1	644	545504	546132	0	729	3788	M
SMAC_Scaffolded_contig_165657	gi|224381666|ref|NC_011462.1|NC_011462_TGU1	73.06	824	154	15	732	1544	552456	551690	3e-132	479	9	M
SMAC_Scaffolded_contig_64988	gi|224381666|ref|NC_011462.1|NC_011462_TGU1	88.24	34	4	0	268	301	572422	572455	0.065	44	106	M
SMAC_Scaffolded_contig_345	gi|224381666|ref|NC_011462.1|NC_011462_TGU1	81.06	1167	149	19	2662	3825	572531	571434	0	1088	21	M
SMAC_Scaffolded_contig_130278	gi|224381666|ref|NC_011462.1|NC_011462_TGU1	76.17	298	65	3	3638	3933	580083	580376	2e-51	210	3	M
SMAC_Scaffolded_contig_22613	gi|224381666|ref|NC_011462.1|NC_011462_TGU1	84.6	617	65	5	2330	2918	585934	585320	0	690	7	M
SMAC_Scaffolded_contig_5237	gi|224381666|ref|NC_011462.1|NC_011462_TGU1	79.84	893	141	16	9006	9873	598234	597356	0	762	5312	M
SMAC_Scaffolded_contig_30497	gi|224381666|ref|NC_011462.1|NC_011462_TGU1	73.86	723	146	16	3263	3975	615055	615744	3e-114	419	6	S
SMAC_Scaffolded_contig_39710	gi|224381666|ref|NC_011462.1|NC_011462_TGU1	76.04	1231	236	16	2701	3916	625090	626276	0	872	6	S
SMAC_Scaffolded_contig_163815	gi|224381666|ref|NC_011462.1|NC_011462_TGU1	74.77	535	88	13	396	922	633385	633880	4e-91	340	1	S
SMAC_Scaffolded_contig_7780	gi|224381666|ref|NC_011462.1|NC_011462_TGU1	72.93	735	137	19	10285	11004	633385	634072	9e-108	399	3843	M
SMAC_Scaffolded_contig_69784	gi|224381666|ref|NC_011462.1|NC_011462_TGU1	78.92	593	117	4	5670	6262	650164	650748	6e-137	495	7	S
SMAC_Scaffolded_contig_154042	gi|224381666|ref|NC_011462.1|NC_011462_TGU1	69.08	841	144	17	1044	1846	680730	679968	1e-100	372	2	S
SMAC_Scaffolded_contig_20105	gi|224381666|ref|NC_011462.1|NC_011462_TGU1	73.25	1417	262	24	18957	20320	682128	683480	0	845	35	M
SMAC_Scaffolded_contig_26322	gi|224381666|ref|NC_011462.1|NC_011462_TGU1	76.21	1753	371	8	6716	8463	693003	691292	0	1287	1567	M
SMAC_Scaffolded_contig_142138	gi|224381666|ref|NC_011462.1|NC_011462_TGU1	84.17	259	39	2	3864	4122	698989	698733	2e-70	275	9	S
SMAC_Scaffolded_contig_165127	gi|224381666|ref|NC_011462.1|NC_011462_TGU1	96.15	26	1	0	13	38	707304	707329	0.1	42	60	M
SMAC_Scaffolded_contig_105653	gi|224381666|ref|NC_011462.1|NC_011462_TGU1	79.12	91	19	0	42	132	709282	709372	0	78	7	M
SMAC_Scaffolded_contig_138454	gi|224381666|ref|NC_011462.1|NC_011462_TGU1	70.6	806	159	22	2094	2894	709407	710139	2e-95	356	2	S
SMAC_Scaffolded_contig_62416	gi|224381666|ref|NC_011462.1|NC_011462_TGU1	79.82	114	15	1	915	1020	711057	711170	3e-20	105	16599	M
SMAC_Scaffolded_contig_147549	gi|224381666|ref|NC_011462.1|NC_011462_TGU1	73.64	220	40	6	2106	2318	723311	723103	7e-26	125	2	S
SMAC_Scaffolded_contig_170142	gi|224381666|ref|NC_011462.1|NC_011462_TGU1	75.53	282	59	3	173	453	724927	725199	2e-47	194	1	S
SMAC_Scaffolded_contig_61584	gi|224381666|ref|NC_011462.1|NC_011462_TGU1	73.93	1074	194	29	90	1151	729880	728881	4e-175	621	4	S
SMAC_Scaffolded_contig_161249	gi|224381666|ref|NC_011462.1|NC_011462_TGU1	66.98	524	106	18	293	796	734133	733657	2e-32	145	1	S
SMAC_Scaffolded_contig_171253	gi|224381666|ref|NC_011462.1|NC_011462_TGU1	72.9	594	120	11	141	734	734689	734137	4e-89	333	1	S
SMAC_Scaffolded_contig_106339	gi|224381666|ref|NC_011462.1|NC_011462_TGU1	75.07	1071	209	14	77	1122	734811	735848	0	717	5	S
SMAC_Scaffolded_contig_85073	gi|224381666|ref|NC_011462.1|NC_011462_TGU1	85.8	162	23	0	794	955	743303	743142	3e-45	188	1	S
SMAC_Scaffolded_contig_10973	gi|224381666|ref|NC_011462.1|NC_011462_TGU1	78.23	441	87	4	3020	3451	745143	744703	2e-94	352	5	M
SMAC_Scaffolded_contig_97178	gi|224381666|ref|NC_011462.1|NC_011462_TGU1	70.57	1444	278	35	3671	5057	750581	751934	0	663	12	M
SMAC_Scaffolded_contig_72012	gi|224381666|ref|NC_011462.1|NC_011462_TGU1	83.3	892	93	9	7063	7932	766358	765501	0	948	42	M
SMAC_Scaffolded_contig_14592	gi|224381666|ref|NC_011462.1|NC_011462_TGU1	80.86	1066	162	13	15869	16914	770749	769706	0	982	2172	M
SMAC_Scaffolded_contig_54544	gi|224381666|ref|NC_011462.1|NC_011462_TGU1	72.55	929	203	16	194	1113	781659	780774	3e-139	500	2	S
SMAC_Scaffolded_contig_117637	gi|224381666|ref|NC_011462.1|NC_011462_TGU1	82.35	51	9	0	507	557	786062	786012	0	51	63	M
SMAC_Scaffolded_contig_28615	gi|224381666|ref|NC_011462.1|NC_011462_TGU1	75.08	967	167	13	1133	2084	786212	787119	0	666	2	S
SMAC_Scaffolded_contig_58886	gi|224381666|ref|NC_011462.1|NC_011462_TGU1	76.37	457	59	7	1322	1762	794942	794519	6e-94	351	1	S
SMAC_Scaffolded_contig_62806	gi|224381666|ref|NC_011462.1|NC_011462_TGU1	73.51	3632	696	57	212	3790	795162	798580	0	2195	47	M
SMAC_Scaffolded_contig_126174	gi|224381666|ref|NC_011462.1|NC_011462_TGU1	71.82	330	49	6	2483	2806	806297	806588	5e-45	188	4	S
SMAC_Scaffolded_contig_96371	gi|224381666|ref|NC_011462.1|NC_011462_TGU1	73.25	1641	296	30	1240	2840	826999	828536	0	975	4	M
SMAC_Scaffolded_contig_110374	gi|224381666|ref|NC_011462.1|NC_011462_TGU1	77.71	830	132	12	2642	3455	831874	832666	0	657	9	M
SMAC_Scaffolded_contig_41815	gi|224381666|ref|NC_011462.1|NC_011462_TGU1	73.92	1706	313	31	3687	5367	837317	835719	0	1050	89	M
SMAC_Scaffolded_contig_52730	gi|224381666|ref|NC_011462.1|NC_011462_TGU1	76.08	807	127	12	1836	2636	841286	840540	2e-165	590	155	M
SMAC_Scaffolded_contig_152290	gi|224381666|ref|NC_011462.1|NC_011462_TGU1	89.1	211	22	1	960	1169	841492	841282	6e-71	273	2	S
SMAC_Scaffolded_contig_24214	gi|224381666|ref|NC_011462.1|NC_011462_TGU1	80.43	46	9	0	124	169	844894	844939	0.79	42	23	M
SMAC_Scaffolded_contig_168890	gi|224381666|ref|NC_011462.1|NC_011462_TGU1	71.63	504	90	14	1579	2073	845735	846194	1e-63	250	7	M
SMAC_Scaffolded_contig_93364	gi|224381666|ref|NC_011462.1|NC_011462_TGU1	72.57	1411	192	37	3996	5360	883992	885253	0	809	659	M
SMAC_Scaffolded_contig_93363	gi|224381666|ref|NC_011462.1|NC_011462_TGU1	80.63	981	124	18	1556	2524	895888	894962	0	892	5	S
SMAC_Scaffolded_contig_34630	gi|224381666|ref|NC_011462.1|NC_011462_TGU1	77.73	1033	171	14	11470	12480	906976	905981	0	816	946	M
SMAC_Scaffolded_contig_31807	gi|224381666|ref|NC_011462.1|NC_011462_TGU1	70.68	873	153	27	257	1095	914778	913975	1e-106	392	2	M
SMAC_Scaffolded_contig_31806	gi|224381666|ref|NC_011462.1|NC_011462_TGU1	69.92	1709	330	36	8625	10260	928404	930001	0	769	1302	M
SMAC_Scaffolded_contig_127364	gi|224381666|ref|NC_011462.1|NC_011462_TGU1	82.61	69	11	1	1	69	947841	947908	2e-09	68	2237	M
SMAC_Scaffolded_contig_93047	gi|224381666|ref|NC_011462.1|NC_011462_TGU1	72.82	927	168	18	2062	2961	961378	962247	4e-148	531	2	S
SMAC_Scaffolded_contig_16094	gi|224381666|ref|NC_011462.1|NC_011462_TGU1	74.08	1848	355	22	23920	25722	963835	965603	0	1186	55	M
SMAC_Scaffolded_contig_173448	gi|224381666|ref|NC_011462.1|NC_011462_TGU1	91.43	35	3	0	520	554	972596	972562	0.001	50	179	M
SMAC_Scaffolded_contig_117480	gi|224381666|ref|NC_011462.1|NC_011462_TGU1	81.81	1484	230	16	12568	14043	984262	982811	0	1424	7	S
SMAC_Scaffolded_contig_108925	gi|224381666|ref|NC_011462.1|NC_011462_TGU1	82.04	323	42	3	1	321	987147	987455	2e-85	322	2	S
SMAC_Scaffolded_contig_136701	gi|224381666|ref|NC_011462.1|NC_011462_TGU1	81.39	935	125	14	2344	3271	990733	989841	0	883	5377	M
SMAC_Scaffolded_contig_154099	gi|224381666|ref|NC_011462.1|NC_011462_TGU1	76.11	653	116	11	902	1551	999295	998680	1e-126	461	7	S
SMAC_Scaffolded_contig_153813	gi|224381666|ref|NC_011462.1|NC_011462_TGU1	73.73	807	147	20	68	859	1005285	1004529	6e-129	468	5	S
SMAC_Scaffolded_contig_66559	gi|224381666|ref|NC_011462.1|NC_011462_TGU1	81.22	474	70	4	5235	5689	1007995	1007522	2e-124	453	3	S
SMAC_Scaffolded_contig_66560	gi|224381666|ref|NC_011462.1|NC_011462_TGU1	74.32	919	154	24	2067	2972	1009520	1010369	2e-156	560	3	S
SMAC_Scaffolded_contig_140402	gi|224381666|ref|NC_011462.1|NC_011462_TGU1	72.82	2314	418	54	11	2286	1012006	1014146	0	1285	1	S
SMAC_Scaffolded_contig_85013	gi|224381666|ref|NC_011462.1|NC_011462_TGU1	74.94	431	75	6	1	426	1015340	1014938	4e-77	293	1	S
SMAC_Scaffolded_contig_190463	gi|224381666|ref|NC_011462.1|NC_011462_TGU1	69.37	764	156	17	3	731	1015812	1016532	4e-84	316	2	M
SMAC_Scaffolded_contig_141516	gi|224381666|ref|NC_011462.1|NC_011462_TGU1	64.13	945	203	23	3	909	1017017	1016171	1e-47	196	2	M
SMAC_Scaffolded_contig_85014	gi|224381666|ref|NC_011462.1|NC_011462_TGU1	80.86	836	134	15	1032	1856	1019223	1018403	0	742	4	M
SMAC_Scaffolded_contig_69990	gi|224381666|ref|NC_011462.1|NC_011462_TGU1	69.1	1741	317	45	1354	3032	1022479	1020898	0	720	3	S
SMAC_Scaffolded_contig_135461	gi|224381666|ref|NC_011462.1|NC_011462_TGU1	68.18	927	172	26	35	914	1025209	1024359	1e-89	336	3	S
SMAC_Scaffolded_contig_37519	gi|224381666|ref|NC_011462.1|NC_011462_TGU1	77.93	1572	194	30	1093	2635	1026787	1028234	0	1274	4	S
SMAC_Scaffolded_contig_135845	gi|224381666|ref|NC_011462.1|NC_011462_TGU1	78.4	986	154	18	4	964	1032845	1031894	0	791	3099	M
SMAC_Scaffolded_contig_68681	gi|224381666|ref|NC_011462.1|NC_011462_TGU1	66.55	1477	307	45	182	1604	1042522	1041179	6e-109	403	998	M
SMAC_Scaffolded_contig_126711	gi|224381666|ref|NC_011462.1|NC_011462_TGU1	72.53	364	52	5	2165	2528	1043193	1043508	2e-56	226	1008	M
SMAC_Scaffolded_contig_75749	gi|224381666|ref|NC_011462.1|NC_011462_TGU1	69.14	243	58	4	757	996	1048069	1047841	7e-18	98	1046	M
SMAC_Scaffolded_contig_75757	gi|224381666|ref|NC_011462.1|NC_011462_TGU1	70.59	170	49	1	326	494	1049249	1049418	1e-12	78	233	M
SMAC_Scaffolded_contig_190115	gi|224381666|ref|NC_011462.1|NC_011462_TGU1	78.63	131	17	4	1	121	1057392	1057521	1e-19	102	54	M
SMAC_Scaffolded_contig_14079	gi|224381666|ref|NC_011462.1|NC_011462_TGU1	69.2	841	182	21	1369	2169	1068690	1067887	2e-85	324	29	M
SMAC_Scaffolded_contig_117300	gi|224381666|ref|NC_011462.1|NC_011462_TGU1	72.32	289	61	5	1208	1496	1071196	1071465	5e-35	156	2	M
SMAC_Scaffolded_contig_143939	gi|224381666|ref|NC_011462.1|NC_011462_TGU1	73.49	611	92	14	1543	2151	1080458	1081000	5e-100	372	3	S
SMAC_Scaffolded_contig_28685	gi|224381666|ref|NC_011462.1|NC_011462_TGU1	76.71	511	92	7	676	1177	1085771	1086263	8e-102	378	428	M
SMAC_Scaffolded_contig_132473	gi|224381666|ref|NC_011462.1|NC_011462_TGU1	77.22	338	50	10	974	1298	1088675	1088352	1e-61	242	2	S
SMAC_Scaffolded_contig_67282	gi|224381666|ref|NC_011462.1|NC_011462_TGU1	66.79	831	158	26	2935	3743	1091648	1090914	3e-61	244	5	S
SMAC_Scaffolded_contig_135684	gi|224381666|ref|NC_011462.1|NC_011462_TGU1	78	250	45	4	1354	1597	1093569	1093814	1e-46	194	3	S
SMAC_Scaffolded_contig_129966	gi|224381666|ref|NC_011462.1|NC_011462_TGU1	70.93	172	33	2	989	1160	1095017	1094863	0	91	143	M
SMAC_Scaffolded_contig_58111	gi|224381666|ref|NC_011462.1|NC_011462_TGU1	70.73	492	80	13	37	523	1101246	1100814	3e-59	237	14	M
SMAC_Scaffolded_contig_65317	gi|224381666|ref|NC_011462.1|NC_011462_TGU1	77.15	766	120	23	7657	8415	1105675	1104958	1e-149	538	11	S
SMAC_Scaffolded_contig_18609	gi|224381666|ref|NC_011462.1|NC_011462_TGU1	74.35	269	52	9	2095	2356	1112398	1112140	1e-32	149	1	S
SMAC_Scaffolded_contig_181829	gi|224381666|ref|NC_011462.1|NC_011462_TGU1	69.62	474	103	13	795	1264	1117897	1118333	3e-44	185	1	S
SMAC_Scaffolded_contig_39128	gi|224381666|ref|NC_011462.1|NC_011462_TGU1	72.99	522	97	14	6420	6918	1120771	1120271	1e-72	282	2	S
SMAC_Scaffolded_contig_76749	gi|224381666|ref|NC_011462.1|NC_011462_TGU1	73.94	752	139	25	882	1619	1125131	1125839	2e-112	412	1	S
SMAC_Scaffolded_contig_28906	gi|224381666|ref|NC_011462.1|NC_011462_TGU1	75.02	1489	254	25	16810	18282	1136993	1138379	0	1002	11804	M
SMAC_Scaffolded_contig_95984	gi|224381666|ref|NC_011462.1|NC_011462_TGU1	68.62	819	173	21	2921	3729	1148537	1147793	2e-78	300	3	S
SMAC_Scaffolded_contig_104386	gi|224381666|ref|NC_011462.1|NC_011462_TGU1	73.27	318	68	5	181	490	1151096	1150788	4e-44	183	1	S
SMAC_Scaffolded_contig_111564	gi|224381666|ref|NC_011462.1|NC_011462_TGU1	69.4	1075	208	26	2145	3206	1156419	1157385	5e-123	448	2	S
SMAC_Scaffolded_contig_86622	gi|224381666|ref|NC_011462.1|NC_011462_TGU1	72.17	1883	345	42	3093	4920	1160471	1162229	0	1005	8	M
SMAC_Scaffolded_contig_140830	gi|224381666|ref|NC_011462.1|NC_011462_TGU1	72.1	552	123	12	42	581	1171332	1171864	2e-72	277	2	M
SMAC_Scaffolded_contig_3841	gi|224381666|ref|NC_011462.1|NC_011462_TGU1	69.87	2549	466	69	1988	4428	1174758	1172404	0	1095	4	M
SMAC_Scaffolded_contig_55750	gi|224381666|ref|NC_011462.1|NC_011462_TGU1	68.12	1123	210	28	6872	7944	1180352	1179328	6e-114	419	405	M
SMAC_Scaffolded_contig_191636	gi|224381666|ref|NC_011462.1|NC_011462_TGU1	79.71	69	12	1	525	591	1188717	1188649	1e-06	59	18	M
SMAC_Scaffolded_contig_167073	gi|224381666|ref|NC_011462.1|NC_011462_TGU1	72.93	133	27	4	9	141	1189223	1189100	9e-09	68	19	M
SMAC_Scaffolded_contig_156384	gi|224381666|ref|NC_011462.1|NC_011462_TGU1	66.71	859	168	29	331	1168	1195427	1196188	3e-59	235	1	S
SMAC_Scaffolded_contig_74889	gi|224381666|ref|NC_011462.1|NC_011462_TGU1	71.11	855	164	22	2171	2982	1200448	1199634	2e-109	405	276	M
SMAC_Scaffolded_contig_152358	gi|224381666|ref|NC_011462.1|NC_011462_TGU1	82.07	329	57	2	401	728	1204138	1203811	1e-84	320	2	S
SMAC_Scaffolded_contig_95299	gi|224381666|ref|NC_011462.1|NC_011462_TGU1	96.75	1077	15	8	481	1537	1209592	1210668	0	1766	2	S
SMAC_Scaffolded_contig_31888	gi|224381666|ref|NC_011462.1|NC_011462_TGU1	74.97	1762	274	33	7582	9284	1210898	1212551	0	1191	160	M
SMAC_Scaffolded_contig_167092	gi|224381666|ref|NC_011462.1|NC_011462_TGU1	86.11	36	5	0	295	330	1215370	1215335	0.076	42	18	M
SMAC_Scaffolded_contig_5359	gi|224381666|ref|NC_011462.1|NC_011462_TGU1	77	1896	269	35	37657	39490	1233708	1231918	0	1447	379	M
SMAC_Scaffolded_contig_125954	gi|224381666|ref|NC_011462.1|NC_011462_TGU1	78.37	453	87	5	130	577	1260764	1261210	3e-98	363	1	S
SMAC_Scaffolded_contig_67025	gi|224381666|ref|NC_011462.1|NC_011462_TGU1	78.64	3731	498	58	16521	20111	1273928	1270357	0	3144	13	M
SMAC_Scaffolded_contig_98595	gi|224381666|ref|NC_011462.1|NC_011462_TGU1	78.57	574	96	11	29	580	1278548	1279116	2e-125	455	2	S
SMAC_Scaffolded_contig_1136	gi|224381666|ref|NC_011462.1|NC_011462_TGU1	76.33	1280	245	23	19091	20362	1297563	1298792	0	892	576	M
SMAC_Scaffolded_contig_86113	gi|224381666|ref|NC_011462.1|NC_011462_TGU1	74.55	1485	305	21	1678	3145	1304620	1306048	0	946	11403	M
SMAC_Scaffolded_contig_1434	gi|224381666|ref|NC_011462.1|NC_011462_TGU1	68.26	2287	419	53	4625	6835	1319937	1317882	0	890	463	M
SMAC_Scaffolded_contig_86721	gi|224381666|ref|NC_011462.1|NC_011462_TGU1	92.31	39	3	0	684	722	1321454	1321416	6e-06	57	83	M
SMAC_Scaffolded_contig_124642	gi|224381666|ref|NC_011462.1|NC_011462_TGU1	76.05	764	139	10	527	1248	1332827	1332066	6e-153	547	2	S
SMAC_Scaffolded_contig_174459	gi|224381666|ref|NC_011462.1|NC_011462_TGU1	80.98	163	26	3	242	400	1333344	1333505	9e-33	145	1	S
SMAC_Scaffolded_contig_175007	gi|224381666|ref|NC_011462.1|NC_011462_TGU1	77.66	470	61	9	8	464	1334523	1334085	2e-101	374	1	S
SMAC_Scaffolded_contig_114876	gi|224381666|ref|NC_011462.1|NC_011462_TGU1	75.68	1591	243	39	3707	5238	1339962	1338457	0	1079	10	M
SMAC_Scaffolded_contig_171987	gi|224381666|ref|NC_011462.1|NC_011462_TGU1	77.92	231	46	3	460	687	1365282	1365054	2e-42	178	4	S
SMAC_Scaffolded_contig_103928	gi|224381666|ref|NC_011462.1|NC_011462_TGU1	72.01	936	176	22	272	1147	1397301	1396392	1e-134	486	2	S
SMAC_Scaffolded_contig_55551	gi|224381666|ref|NC_011462.1|NC_011462_TGU1	68.68	2666	525	59	25624	28221	1397357	1399780	0	1058	640	M
SMAC_Scaffolded_contig_158620	gi|224381666|ref|NC_011462.1|NC_011462_TGU1	95.83	24	1	0	3	26	1420326	1420303	0.94	39	10	M
SMAC_Scaffolded_contig_28980	gi|224381666|ref|NC_011462.1|NC_011462_TGU1	76.73	1405	255	17	5202	6560	1422322	1423700	0	1049	4259	M
SMAC_Scaffolded_contig_166799	gi|224381666|ref|NC_011462.1|NC_011462_TGU1	82.46	57	8	1	423	479	1424526	1424472	2e-05	55	39	M
SMAC_Scaffolded_contig_76375	gi|224381666|ref|NC_011462.1|NC_011462_TGU1	74.96	1270	229	20	9645	10900	1444750	1443556	0	847	347	M
SMAC_Scaffolded_contig_52373	gi|224381666|ref|NC_011462.1|NC_011462_TGU1	70.76	2852	600	67	6057	8822	1463217	1460514	0	1292	20	M
SMAC_Scaffolded_contig_128284	gi|224381666|ref|NC_011462.1|NC_011462_TGU1	78.31	899	171	13	1	890	1465886	1465003	0	706	5	M
SMAC_Scaffolded_contig_91994	gi|224381666|ref|NC_011462.1|NC_011462_TGU1	70.85	398	94	18	110	504	1471593	1471215	5e-29	134	5	M
SMAC_Scaffolded_contig_42283	gi|224381666|ref|NC_011462.1|NC_011462_TGU1	76.81	1531	262	18	11043	12525	1472431	1473916	0	1164	2263	M
SMAC_Scaffolded_contig_27233	gi|224381666|ref|NC_011462.1|NC_011462_TGU1	71.46	1279	267	29	3913	5169	1479555	1480757	2e-174	619	1	S
SMAC_Scaffolded_contig_82341	gi|224381666|ref|NC_011462.1|NC_011462_TGU1	76.38	2650	442	49	1301	3876	1481417	1483956	0	1902	2	S
SMAC_Scaffolded_contig_101252	gi|224381666|ref|NC_011462.1|NC_011462_TGU1	87.8	41	4	1	752	792	1491165	1491126	0.003	48	94	M
SMAC_Scaffolded_contig_121492	gi|224381666|ref|NC_011462.1|NC_011462_TGU1	74.52	416	77	5	915	1301	1495439	1495024	6e-72	277	2319	M
SMAC_Scaffolded_contig_42446	gi|224381666|ref|NC_011462.1|NC_011462_TGU1	75.28	2087	345	38	4477	6520	1533757	1531799	0	1420	846	M
SMAC_Scaffolded_contig_29036	gi|224381666|ref|NC_011462.1|NC_011462_TGU1	74.15	236	53	4	4749	4984	1535175	1534948	4e-30	140	24	M
SMAC_Scaffolded_contig_124521	gi|224381666|ref|NC_011462.1|NC_011462_TGU1	73.65	668	125	10	147	804	1538076	1538702	1e-112	412	2	S
SMAC_Scaffolded_contig_80236	gi|224381666|ref|NC_011462.1|NC_011462_TGU1	74.1	3378	524	77	2263	5504	1550954	1554116	0	2116	7	S
SMAC_Scaffolded_contig_6116	gi|224381666|ref|NC_011462.1|NC_011462_TGU1	70.62	817	142	23	12684	13436	1559737	1560519	1e-100	376	26	M
SMAC_Scaffolded_contig_7722	gi|224381666|ref|NC_011462.1|NC_011462_TGU1	69.48	1055	203	26	12	1033	1565314	1564346	5e-121	441	2	S
SMAC_Scaffolded_contig_126243	gi|224381666|ref|NC_011462.1|NC_011462_TGU1	73.41	1132	191	22	1075	2138	1566106	1567195	0	684	9	M
SMAC_Scaffolded_contig_164522	gi|224381666|ref|NC_011462.1|NC_011462_TGU1	79.89	895	112	11	1	879	1578729	1579571	0	814	1	S
SMAC_Scaffolded_contig_10166	gi|224381666|ref|NC_011462.1|NC_011462_TGU1	75.29	2728	471	44	14683	17306	1585956	1588584	0	1865	9153	M
SMAC_Scaffolded_contig_19856	gi|224381666|ref|NC_011462.1|NC_011462_TGU1	83.72	3525	470	34	29970	33443	1627697	1624226	0	3710	17	M
SMAC_Scaffolded_contig_119412	gi|224381666|ref|NC_011462.1|NC_011462_TGU1	71.4	972	164	22	1258	2177	1630807	1629898	4e-140	504	4	S
SMAC_Scaffolded_contig_107932	gi|224381666|ref|NC_011462.1|NC_011462_TGU1	82.03	1575	159	24	1	1503	1652450	1650928	0	1568	4	S
SMAC_Scaffolded_contig_28706	gi|224381666|ref|NC_011462.1|NC_011462_TGU1	74.62	2356	425	36	11369	13663	1671293	1673536	0	1546	18	M
SMAC_Scaffolded_contig_16523	gi|224381666|ref|NC_011462.1|NC_011462_TGU1	77.29	1845	296	28	20	1818	1677542	1679309	0	1424	16	M
SMAC_Scaffolded_contig_160673	gi|224381666|ref|NC_011462.1|NC_011462_TGU1	75.17	757	149	14	52	776	1688607	1689356	3e-136	489	1	S
SMAC_Scaffolded_contig_70451	gi|224381666|ref|NC_011462.1|NC_011462_TGU1	75.69	1810	319	44	826	2568	1695683	1697438	0	1191	6	S
SMAC_Scaffolded_contig_75176	gi|224381666|ref|NC_011462.1|NC_011462_TGU1	79.95	883	124	17	1	865	1697346	1698193	0	765	9	S
SMAC_Scaffolded_contig_96492	gi|224381666|ref|NC_011462.1|NC_011462_TGU1	69.93	572	93	18	43	562	1703135	1703679	9e-63	246	4	M
SMAC_Scaffolded_contig_130279	gi|224381666|ref|NC_011462.1|NC_011462_TGU1	75.35	4236	664	86	440	4567	1709644	1705681	0	2888	7	S
SMAC_Scaffolded_contig_171066	gi|224381666|ref|NC_011462.1|NC_011462_TGU1	76.52	873	136	12	21	890	1710529	1709723	0	659	2	S
SMAC_Scaffolded_contig_103730	gi|224381666|ref|NC_011462.1|NC_011462_TGU1	81.14	1251	188	13	1886	3132	1717469	1718675	0	1177	10	S
SMAC_Scaffolded_contig_6556	gi|224381666|ref|NC_011462.1|NC_011462_TGU1	69.94	1284	214	29	779	1995	1722417	1723595	8e-169	600	5368	M
SMAC_Scaffolded_contig_146646	gi|224381666|ref|NC_011462.1|NC_011462_TGU1	70.62	480	106	12	91	566	1731526	1731078	1e-51	208	1	S
SMAC_Scaffolded_contig_133871	gi|224381666|ref|NC_011462.1|NC_011462_TGU1	75.79	475	71	7	75	542	1732573	1732136	2e-93	347	1	S
SMAC_Scaffolded_contig_1949	gi|224381666|ref|NC_011462.1|NC_011462_TGU1	79.71	3293	498	43	22191	25411	1738077	1741271	0	2886	60	M
SMAC_Scaffolded_contig_66815	gi|224381666|ref|NC_011462.1|NC_011462_TGU1	80.1	1191	169	10	1042	2211	1769107	1770250	0	1095	4	S
SMAC_Scaffolded_contig_17108	gi|224381666|ref|NC_011462.1|NC_011462_TGU1	78.05	1148	148	25	32	1125	1778207	1777110	0	915	9	M
SMAC_Scaffolded_contig_165296	gi|224381666|ref|NC_011462.1|NC_011462_TGU1	78.79	99	21	0	320	418	1779490	1779392	3e-14	84	46	M
SMAC_Scaffolded_contig_144747	gi|224381666|ref|NC_011462.1|NC_011462_TGU1	90.48	567	51	2	1505	2069	1780720	1780155	0	773	3	S
SMAC_Scaffolded_contig_69357	gi|224381666|ref|NC_011462.1|NC_011462_TGU1	76.22	3503	611	57	3	3420	1805725	1802360	0	2506	319	M
SMAC_Scaffolded_contig_33411	gi|224381666|ref|NC_011462.1|NC_011462_TGU1	79.28	1197	173	22	875	2061	1809897	1808766	0	1009	3	S
SMAC_Scaffolded_contig_21738	gi|224381666|ref|NC_011462.1|NC_011462_TGU1	69.67	366	99	9	4420	4778	1815197	1815557	2e-35	158	86	M
SMAC_Scaffolded_contig_17198	gi|224381666|ref|NC_011462.1|NC_011462_TGU1	84.52	168	22	4	2803	2968	1815392	1815557	1e-39	172	580	M
SMAC_Scaffolded_contig_68125	gi|224381666|ref|NC_011462.1|NC_011462_TGU1	81.41	156	26	3	7	160	1815404	1815558	4e-31	140	47	M
SMAC_Scaffolded_contig_149864	gi|224381666|ref|NC_011462.1|NC_011462_TGU1	87.8	123	14	1	8	129	1815432	1815554	6e-34	150	166	M
SMAC_Scaffolded_contig_27137	gi|224381666|ref|NC_011462.1|NC_011462_TGU1	77.35	234	43	5	2498	2724	1815638	1815408	1e-39	170	226	M
SMAC_Scaffolded_contig_64403	gi|224381666|ref|NC_011462.1|NC_011462_TGU1	81.92	1200	157	18	1	1181	1817958	1816800	0	1159	6	M
SMAC_Scaffolded_contig_64416	gi|224381666|ref|NC_011462.1|NC_011462_TGU1	74.08	2407	359	51	964	3310	1819184	1821385	0	1537	32	M
SMAC_Scaffolded_contig_146987	gi|224381666|ref|NC_011462.1|NC_011462_TGU1	70.85	343	85	6	81	419	1830737	1830406	2e-35	154	1	S
SMAC_Scaffolded_contig_150578	gi|224381666|ref|NC_011462.1|NC_011462_TGU1	71.08	1034	223	22	2	1004	1848587	1847599	6e-135	486	2	S
SMAC_Scaffolded_contig_171154	gi|224381666|ref|NC_011462.1|NC_011462_TGU1	69.06	320	50	11	262	576	1852074	1851799	9e-27	125	1	S
SMAC_Scaffolded_contig_40651	gi|224381666|ref|NC_011462.1|NC_011462_TGU1	75.41	1464	251	24	11776	13206	1856395	1857782	0	1007	15	M
SMAC_Scaffolded_contig_150335	gi|224381666|ref|NC_011462.1|NC_011462_TGU1	89.87	553	51	3	431	983	1863640	1864187	0	737	3	M
SMAC_Scaffolded_contig_121812	gi|224381666|ref|NC_011462.1|NC_011462_TGU1	78.78	509	89	6	1355	1863	1868212	1868701	3e-115	421	2	S
SMAC_Scaffolded_contig_164735	gi|224381666|ref|NC_011462.1|NC_011462_TGU1	75.22	561	117	11	2	556	1870402	1869858	3e-96	356	2	S
SMAC_Scaffolded_contig_149231	gi|224381666|ref|NC_011462.1|NC_011462_TGU1	84.38	877	87	10	4	836	1870412	1871282	0	964	2	S
SMAC_Scaffolded_contig_38471	gi|224381666|ref|NC_011462.1|NC_011462_TGU1	76.88	1834	283	38	5472	7250	1871282	1869535	0	1352	9	M
SMAC_Scaffolded_contig_152433	gi|224381666|ref|NC_011462.1|NC_011462_TGU1	73.95	430	97	6	17	441	1872930	1872511	2e-66	257	1	S
SMAC_Scaffolded_contig_44085	gi|224381666|ref|NC_011462.1|NC_011462_TGU1	74.27	2666	474	50	7942	10530	1887453	1889983	0	1682	17	M
SMAC_Scaffolded_contig_89227	gi|224381666|ref|NC_011462.1|NC_011462_TGU1	74.92	2472	442	48	173	2589	1889983	1887635	0	1608	2	S
SMAC_Scaffolded_contig_100098	gi|224381666|ref|NC_011462.1|NC_011462_TGU1	73.94	775	136	17	1986	2724	1894816	1894072	1e-129	470	2	S
SMAC_Scaffolded_contig_175131	gi|224381666|ref|NC_011462.1|NC_011462_TGU1	94.37	71	4	0	1	71	1905740	1905670	2e-22	111	1	S
SMAC_Scaffolded_contig_180315	gi|224381666|ref|NC_011462.1|NC_011462_TGU1	83.54	164	15	2	1	152	1909623	1909460	5e-42	176	1	S
SMAC_Scaffolded_contig_231	gi|224381666|ref|NC_011462.1|NC_011462_TGU1	78.2	1064	182	14	1	1028	1916760	1917809	0	856	2	M
SMAC_Scaffolded_contig_44417	gi|224381666|ref|NC_011462.1|NC_011462_TGU1	72.41	3353	566	75	4285	7481	1924904	1921755	0	1862	15	M
SMAC_Scaffolded_contig_15623	gi|224381666|ref|NC_011462.1|NC_011462_TGU1	77.03	1328	196	26	1608	2869	1936660	1937944	0	1002	3379	M
SMAC_Scaffolded_contig_2485	gi|224381666|ref|NC_011462.1|NC_011462_TGU1	92.98	57	4	0	2	58	1955170	1955226	5e-14	86	13281	M
SMAC_Scaffolded_contig_12935	gi|224381666|ref|NC_011462.1|NC_011462_TGU1	78.25	2028	345	24	10931	12899	1959920	1961910	0	1647	2026	M
SMAC_Scaffolded_contig_123723	gi|224381666|ref|NC_011462.1|NC_011462_TGU1	69.64	1199	268	30	410	1588	1992414	1993536	6e-131	473	2	S
SMAC_Scaffolded_contig_7875	gi|224381666|ref|NC_011462.1|NC_011462_TGU1	74.25	3142	527	70	66981	70002	2007594	2004615	0	1957	30603	M
SMAC_Scaffolded_contig_55755	gi|224381666|ref|NC_011462.1|NC_011462_TGU1	74.18	213	55	0	450	662	2020728	2020940	2e-29	136	20	M
SMAC_Scaffolded_contig_70547	gi|224381666|ref|NC_011462.1|NC_011462_TGU1	72.04	186	52	0	2229	2414	2020750	2020935	1e-18	102	41	M
SMAC_Scaffolded_contig_19999	gi|224381666|ref|NC_011462.1|NC_011462_TGU1	75.83	877	172	14	3691	4567	2041017	2040181	3e-168	600	7	M
SMAC_Scaffolded_contig_73060	gi|224381666|ref|NC_011462.1|NC_011462_TGU1	80.23	86	17	0	285	370	2046915	2046830	4e-12	78	56	M
SMAC_Scaffolded_contig_108796	gi|224381666|ref|NC_011462.1|NC_011462_TGU1	76.92	338	63	8	123	454	2060062	2059734	9e-60	235	1	S
SMAC_Scaffolded_contig_6558	gi|224381666|ref|NC_011462.1|NC_011462_TGU1	78.42	570	108	10	17586	18145	2095036	2094472	9e-121	443	12	S
SMAC_Scaffolded_contig_99457	gi|224381666|ref|NC_011462.1|NC_011462_TGU1	87.01	177	22	1	1	177	2095996	2095821	5e-52	212	2	S
SMAC_Scaffolded_contig_158667	gi|224381666|ref|NC_011462.1|NC_011462_TGU1	78.85	156	33	0	1239	1394	2102338	2102493	3e-28	132	1	S
SMAC_Scaffolded_contig_137014	gi|224381666|ref|NC_011462.1|NC_011462_TGU1	64.23	506	109	12	1	503	2105949	2106385	4e-21	107	114	M
SMAC_Scaffolded_contig_71825	gi|224381666|ref|NC_011462.1|NC_011462_TGU1	76.96	829	142	20	8424	9246	2112705	2113490	7e-165	589	29	M
SMAC_Scaffolded_contig_186066	gi|224381666|ref|NC_011462.1|NC_011462_TGU1	72.23	641	112	14	32	637	2115802	2116411	1e-94	351	2	M
SMAC_Scaffolded_contig_184075	gi|224381666|ref|NC_011462.1|NC_011462_TGU1	78.06	237	48	3	4984	5218	2117452	2117686	4e-43	183	1	S
SMAC_Scaffolded_contig_192419	gi|224381666|ref|NC_011462.1|NC_011462_TGU1	69.19	396	87	15	316	692	2117917	2118296	9e-28	129	1	S
SMAC_Scaffolded_contig_89839	gi|224381666|ref|NC_011462.1|NC_011462_TGU1	86.21	203	20	4	66	266	2119127	2118931	9e-58	230	2	S
SMAC_Scaffolded_contig_118197	gi|224381666|ref|NC_011462.1|NC_011462_TGU1	72.57	3532	674	82	1710	5140	2127690	2124353	0	1898	1	S
SMAC_Scaffolded_contig_28625	gi|224381666|ref|NC_011462.1|NC_011462_TGU1	67.15	2627	541	66	1786	4270	2152413	2154859	0	839	9078	M
SMAC_Scaffolded_contig_94623	gi|224381666|ref|NC_011462.1|NC_011462_TGU1	77.18	574	81	10	1	559	2165980	2166518	9e-123	444	2	S
SMAC_Scaffolded_contig_161881	gi|224381666|ref|NC_011462.1|NC_011462_TGU1	75.2	762	108	19	116	839	2167820	2167102	4e-142	509	3	S
SMAC_Scaffolded_contig_177973	gi|224381666|ref|NC_011462.1|NC_011462_TGU1	79.96	509	73	6	3	505	2172541	2172056	2e-126	457	4	S
SMAC_Scaffolded_contig_12832	gi|224381666|ref|NC_011462.1|NC_011462_TGU1	79.21	1015	162	20	4337	5346	2178894	2179864	0	834	12275	M
SMAC_Scaffolded_contig_191906	gi|224381666|ref|NC_011462.1|NC_011462_TGU1	100	25	0	0	56	80	2187805	2187781	0.007	46	267	M
SMAC_Scaffolded_contig_152519	gi|224381666|ref|NC_011462.1|NC_011462_TGU1	87.18	39	4	1	136	174	2189956	2189919	0.027	44	50	M
SMAC_Scaffolded_contig_14492	gi|224381666|ref|NC_011462.1|NC_011462_TGU1	68.21	2548	519	62	4448	6917	2196858	2194524	0	926	11903	M
SMAC_Scaffolded_contig_48234	gi|224381666|ref|NC_011462.1|NC_011462_TGU1	72.96	1017	185	24	3020	3989	2220707	2219734	2e-158	567	6480	M
SMAC_Scaffolded_contig_23751	gi|224381666|ref|NC_011462.1|NC_011462_TGU1	82.46	1089	190	1	5	1093	2237388	2238475	0	1099	4277	M
SMAC_Scaffolded_contig_72515	gi|224381666|ref|NC_011462.1|NC_011462_TGU1	71.64	1876	361	43	70	1831	2237395	2235577	0	946	2626	M
SMAC_Scaffolded_contig_74500	gi|224381666|ref|NC_011462.1|NC_011462_TGU1	65.19	675	153	14	2	660	2243133	2242525	3e-40	170	1	S
SMAC_Scaffolded_contig_132027	gi|224381666|ref|NC_011462.1|NC_011462_TGU1	68.07	357	78	13	58	400	2244908	2244574	4e-20	104	48	M
SMAC_Scaffolded_contig_170369	gi|224381666|ref|NC_011462.1|NC_011462_TGU1	74.8	500	108	7	31	526	2265913	2266398	2e-84	318	3	S
SMAC_Scaffolded_contig_60811	gi|224381666|ref|NC_011462.1|NC_011462_TGU1	73.83	642	106	12	13	640	2268635	2268042	1e-109	403	39	M
SMAC_Scaffolded_contig_78540	gi|224381666|ref|NC_011462.1|NC_011462_TGU1	74.63	2471	444	42	5703	8128	2291523	2293855	0	1606	1127	M
SMAC_Scaffolded_contig_169718	gi|224381666|ref|NC_011462.1|NC_011462_TGU1	86.36	88	12	0	416	503	2303492	2303405	8e-21	105	1	S
SMAC_Scaffolded_contig_26685	gi|224381666|ref|NC_011462.1|NC_011462_TGU1	76.58	2856	417	50	6216	8932	2306621	2303879	0	2136	10	S
SMAC_Scaffolded_contig_44120	gi|224381666|ref|NC_011462.1|NC_011462_TGU1	73.38	710	150	12	1268	1958	2308260	2308949	6e-112	410	3	S
SMAC_Scaffolded_contig_51400	gi|224381666|ref|NC_011462.1|NC_011462_TGU1	87.6	121	11	3	9351	9471	2311864	2311748	5e-30	141	888	M
SMAC_Scaffolded_contig_31502	gi|224381666|ref|NC_011462.1|NC_011462_TGU1	68.68	3675	745	108	10860	14425	2326246	2329623	0	1317	7641	M
SMAC_Scaffolded_contig_192008	gi|224381666|ref|NC_011462.1|NC_011462_TGU1	91.04	67	6	0	275	341	2332050	2331984	2e-17	95	21440	M
SMAC_Scaffolded_contig_31501	gi|224381666|ref|NC_011462.1|NC_011462_TGU1	72.8	1331	279	29	2	1315	2333448	2332184	0	713	4	M
SMAC_Scaffolded_contig_180762	gi|224381666|ref|NC_011462.1|NC_011462_TGU1	70.72	181	35	6	1	163	2337189	2337009	4e-12	77	69	M
SMAC_Scaffolded_contig_140510	gi|224381666|ref|NC_011462.1|NC_011462_TGU1	76.01	1213	216	28	614	1805	2338454	2337296	0	818	2	S
SMAC_Scaffolded_contig_101521	gi|224381666|ref|NC_011462.1|NC_011462_TGU1	81.17	1041	117	17	1	986	2342994	2341978	0	989	4	S
SMAC_Scaffolded_contig_60644	gi|224381666|ref|NC_011462.1|NC_011462_TGU1	73.16	3234	547	79	1724	4822	2350072	2353119	0	1853	13	M
SMAC_Scaffolded_contig_87067	gi|224381666|ref|NC_011462.1|NC_011462_TGU1	75.69	1263	210	24	499	1738	2376760	2375572	0	874	211	M
SMAC_Scaffolded_contig_87066	gi|224381666|ref|NC_011462.1|NC_011462_TGU1	73.91	1146	225	21	38	1170	2377044	2378128	0	691	2	M
SMAC_Scaffolded_contig_18598	gi|224381666|ref|NC_011462.1|NC_011462_TGU1	78.65	1583	240	30	7759	9256	2386695	2385126	0	1285	598	M
SMAC_Scaffolded_contig_146011	gi|224381666|ref|NC_011462.1|NC_011462_TGU1	85.17	580	67	8	3	579	2392816	2392253	0	639	1974	M
SMAC_Scaffolded_contig_121887	gi|224381666|ref|NC_011462.1|NC_011462_TGU1	79.41	748	119	7	234	977	2398571	2397855	0	655	3	S
SMAC_Scaffolded_contig_124083	gi|224381666|ref|NC_011462.1|NC_011462_TGU1	70.87	1181	222	33	566	1717	2401010	2402097	4e-151	540	1	S
SMAC_Scaffolded_contig_1322	gi|224381666|ref|NC_011462.1|NC_011462_TGU1	71.74	1953	349	42	828	2739	2410264	2408474	0	1027	2	M
SMAC_Scaffolded_contig_1382	gi|224381666|ref|NC_011462.1|NC_011462_TGU1	72.25	1254	226	27	12384	13580	2411669	2412857	0	681	5	S
SMAC_Scaffolded_contig_154644	gi|224381666|ref|NC_011462.1|NC_011462_TGU1	66.61	1204	219	25	619	1747	2427997	2429092	1e-112	412	2	S
SMAC_Scaffolded_contig_131291	gi|224381666|ref|NC_011462.1|NC_011462_TGU1	73.22	829	131	18	102	917	2433940	2434690	8e-138	495	1	S
SMAC_Scaffolded_contig_42514	gi|224381666|ref|NC_011462.1|NC_011462_TGU1	82	50	8	1	617	666	2454255	2454207	0.016	46	64	M
SMAC_Scaffolded_contig_108230	gi|224381666|ref|NC_011462.1|NC_011462_TGU1	80.51	1093	164	13	146	1227	2473860	2472806	0	996	16	M
SMAC_Scaffolded_contig_137185	gi|224381666|ref|NC_011462.1|NC_011462_TGU1	83.87	620	88	6	4628	5244	2474812	2474202	0	652	4	M
SMAC_Scaffolded_contig_52262	gi|224381666|ref|NC_011462.1|NC_011462_TGU1	72.3	722	137	11	895	1597	2475520	2474843	2e-111	408	578	M
SMAC_Scaffolded_contig_129735	gi|224381666|ref|NC_011462.1|NC_011462_TGU1	74.63	3670	662	68	4334	7904	2484992	2488491	0	2358	12	M
SMAC_Scaffolded_contig_134069	gi|224381666|ref|NC_011462.1|NC_011462_TGU1	68.17	1219	248	22	1	1207	2489578	2488488	3e-132	477	1	S
SMAC_Scaffolded_contig_75896	gi|224381666|ref|NC_011462.1|NC_011462_TGU1	73.48	3484	621	73	2211	5569	2496160	2499465	0	2062	12	M
SMAC_Scaffolded_contig_75897	gi|224381666|ref|NC_011462.1|NC_011462_TGU1	74.7	1846	336	43	9	1805	2499076	2497313	0	1148	2	M
SMAC_Scaffolded_contig_176726	gi|224381666|ref|NC_011462.1|NC_011462_TGU1	74.9	992	176	16	39	981	2512004	2511037	0	661	1	S
SMAC_Scaffolded_contig_157164	gi|224381666|ref|NC_011462.1|NC_011462_TGU1	84.71	242	35	1	10	249	2515268	2515027	3e-69	268	3	M
SMAC_Scaffolded_contig_70294	gi|224381666|ref|NC_011462.1|NC_011462_TGU1	75.13	1150	186	25	9305	10406	2526820	2527917	0	762	16	M
SMAC_Scaffolded_contig_164630	gi|224381666|ref|NC_011462.1|NC_011462_TGU1	74.68	624	143	6	28	637	2529027	2528405	3e-109	399	2	M
SMAC_Scaffolded_contig_90221	gi|224381666|ref|NC_011462.1|NC_011462_TGU1	76.38	436	99	3	1666	2099	2570238	2569805	5e-82	313	3	S
SMAC_Scaffolded_contig_90222	gi|224381666|ref|NC_011462.1|NC_011462_TGU1	69.43	229	38	4	776	1002	2574651	2574849	2e-21	109	243	M
SMAC_Scaffolded_contig_164062	gi|224381666|ref|NC_011462.1|NC_011462_TGU1	70.92	502	92	15	2	476	2575948	2575474	9e-58	228	1	S
SMAC_Scaffolded_contig_32997	gi|224381666|ref|NC_011462.1|NC_011462_TGU1	80.95	126	16	4	1	119	2576684	2576560	2e-21	109	1	S
SMAC_Scaffolded_contig_37047	gi|224381666|ref|NC_011462.1|NC_011462_TGU1	71.76	2553	467	60	4094	6511	2580997	2583430	0	1323	12	S
SMAC_Scaffolded_contig_37046	gi|224381666|ref|NC_011462.1|NC_011462_TGU1	68.49	1568	295	41	1529	3040	2588520	2587096	1e-167	596	2	S
SMAC_Scaffolded_contig_179670	gi|224381666|ref|NC_011462.1|NC_011462_TGU1	78.19	321	49	4	235	549	2594729	2594424	7e-68	264	3	S
SMAC_Scaffolded_contig_172202	gi|224381666|ref|NC_011462.1|NC_011462_TGU1	68.97	203	47	4	120	321	2596918	2596731	1e-12	78	40	M
SMAC_Scaffolded_contig_140935	gi|224381666|ref|NC_011462.1|NC_011462_TGU1	72.18	611	94	16	50	651	2598253	2598796	5e-89	333	2	S
SMAC_Scaffolded_contig_140934	gi|224381666|ref|NC_011462.1|NC_011462_TGU1	75	148	29	2	3	142	2603158	2603011	0	98	55	M
SMAC_Scaffolded_contig_22630	gi|224381666|ref|NC_011462.1|NC_011462_TGU1	67.08	644	129	14	236	832	2603779	2603172	3e-54	217	2	S
SMAC_Scaffolded_contig_14878	gi|224381666|ref|NC_011462.1|NC_011462_TGU1	73.47	1440	280	24	2958	4360	2607595	2608969	0	859	4	S
SMAC_Scaffolded_contig_136263	gi|224381666|ref|NC_011462.1|NC_011462_TGU1	73.93	679	93	20	2079	2741	2619152	2619762	2e-112	412	1861	M
SMAC_Scaffolded_contig_11284	gi|224381666|ref|NC_011462.1|NC_011462_TGU1	68.9	1103	246	17	4536	5626	2622451	2621434	3e-124	453	2124	M
SMAC_Scaffolded_contig_67645	gi|224381666|ref|NC_011462.1|NC_011462_TGU1	74.24	524	87	8	7935	8450	2636883	2637366	4e-91	343	1343	M
SMAC_Scaffolded_contig_33402	gi|224381666|ref|NC_011462.1|NC_011462_TGU1	86.49	37	4	1	5046	5082	2637868	2637903	2.8	41	8	M
SMAC_Scaffolded_contig_97233	gi|224381666|ref|NC_011462.1|NC_011462_TGU1	71.38	821	177	15	1191	1993	2638516	2639296	1e-110	407	74	M
SMAC_Scaffolded_contig_36041	gi|224381666|ref|NC_011462.1|NC_011462_TGU1	76	3942	671	62	18338	22234	2639843	2643554	0	2812	4515	M
SMAC_Scaffolded_contig_44522	gi|224381666|ref|NC_011462.1|NC_011462_TGU1	74.68	1635	309	25	748	2358	2668363	2669916	0	1065	1	S
SMAC_Scaffolded_contig_41400	gi|224381666|ref|NC_011462.1|NC_011462_TGU1	73.26	2098	340	36	1	2025	2672521	2670572	0	1292	170	M
SMAC_Scaffolded_contig_41401	gi|224381666|ref|NC_011462.1|NC_011462_TGU1	76.41	551	103	8	1055	1605	2673619	2674142	1e-107	396	4	M
SMAC_Scaffolded_contig_141387	gi|224381666|ref|NC_011462.1|NC_011462_TGU1	72.71	1286	232	37	3128	4380	2683374	2684573	0	677	8294	M
SMAC_Scaffolded_contig_30797	gi|224381666|ref|NC_011462.1|NC_011462_TGU1	75.88	1455	240	14	5345	6720	2687185	2685763	0	1079	10	M
SMAC_Scaffolded_contig_57408	gi|224381666|ref|NC_011462.1|NC_011462_TGU1	77.93	3503	562	52	11415	14790	2707038	2703620	0	2789	11094	M
SMAC_Scaffolded_contig_74657	gi|224381666|ref|NC_011462.1|NC_011462_TGU1	70.18	788	178	14	46	782	2724292	2725073	2e-94	351	1	S
SMAC_Scaffolded_contig_149380	gi|224381666|ref|NC_011462.1|NC_011462_TGU1	74.02	204	37	6	274	465	2727246	2727445	4e-24	116	1	S
SMAC_Scaffolded_contig_177166	gi|224381666|ref|NC_011462.1|NC_011462_TGU1	80.95	399	62	4	5	394	2729702	2729309	1e-100	372	3	S
SMAC_Scaffolded_contig_56523	gi|224381666|ref|NC_011462.1|NC_011462_TGU1	79.65	1140	208	9	5092	6222	2735569	2736693	0	991	14	M
SMAC_Scaffolded_contig_182	gi|224381666|ref|NC_011462.1|NC_011462_TGU1	72.4	279	65	4	15	284	2739519	2739794	1e-37	161	453	M
SMAC_Scaffolded_contig_96911	gi|224381666|ref|NC_011462.1|NC_011462_TGU1	81.56	141	24	2	412	552	2739520	2739658	2e-28	131	55	M
SMAC_Scaffolded_contig_74697	gi|224381666|ref|NC_011462.1|NC_011462_TGU1	75.39	191	46	1	697	886	2739545	2739735	1e-27	129	23	M
SMAC_Scaffolded_contig_87187	gi|224381666|ref|NC_011462.1|NC_011462_TGU1	81.67	120	22	0	1328	1447	2739545	2739664	4e-24	118	2	M
SMAC_Scaffolded_contig_61730	gi|224381666|ref|NC_011462.1|NC_011462_TGU1	79.74	153	28	2	1120	1270	2739671	2739520	5e-28	131	9	M
SMAC_Scaffolded_contig_91369	gi|224381666|ref|NC_011462.1|NC_011462_TGU1	82.91	117	18	1	1	117	2739684	2739570	2e-24	118	3	M
SMAC_Scaffolded_contig_38311	gi|224381666|ref|NC_011462.1|NC_011462_TGU1	80.36	168	33	0	1186	1353	2739723	2739556	1e-34	154	520	M
SMAC_Scaffolded_contig_77140	gi|224381666|ref|NC_011462.1|NC_011462_TGU1	77.37	190	42	1	4535	4724	2739723	2739535	2e-31	145	24	M
SMAC_Scaffolded_contig_136128	gi|224381666|ref|NC_011462.1|NC_011462_TGU1	73.79	290	60	8	506	783	2739805	2739520	6e-37	159	179	M
SMAC_Scaffolded_contig_136741	gi|224381666|ref|NC_011462.1|NC_011462_TGU1	74.62	457	85	10	324	755	2739848	2739398	3e-74	284	6758	M
SMAC_Scaffolded_contig_130305	gi|224381666|ref|NC_011462.1|NC_011462_TGU1	88.24	34	4	0	500	533	2741900	2741933	0.034	44	40	M
SMAC_Scaffolded_contig_163990	gi|224381666|ref|NC_011462.1|NC_011462_TGU1	72.1	577	113	11	23	592	2744143	2744678	6e-82	309	2	M
SMAC_Scaffolded_contig_63195	gi|224381666|ref|NC_011462.1|NC_011462_TGU1	75.21	2041	374	34	1162	3173	2746029	2747966	0	1366	14906	M
SMAC_Scaffolded_contig_173036	gi|224381666|ref|NC_011462.1|NC_011462_TGU1	80.77	52	8	1	258	307	2747318	2747267	0.009	46	83	M
SMAC_Scaffolded_contig_160521	gi|224381666|ref|NC_011462.1|NC_011462_TGU1	70.51	1014	188	24	538	1487	2764869	2763903	4e-131	473	4	M
SMAC_Scaffolded_contig_123949	gi|224381666|ref|NC_011462.1|NC_011462_TGU1	75.05	513	98	13	124	618	2768405	2767905	3e-84	316	1	S
SMAC_Scaffolded_contig_120715	gi|224381666|ref|NC_011462.1|NC_011462_TGU1	74.75	1097	202	21	5405	6482	2778415	2779455	0	702	8	M
SMAC_Scaffolded_contig_132749	gi|224381666|ref|NC_011462.1|NC_011462_TGU1	69.47	914	189	24	3	855	2797067	2796183	4e-98	363	4	S
SMAC_Scaffolded_contig_174335	gi|224381666|ref|NC_011462.1|NC_011462_TGU1	71.83	497	96	12	614	1095	2797585	2797118	2e-64	251	2	S
SMAC_Scaffolded_contig_158398	gi|224381666|ref|NC_011462.1|NC_011462_TGU1	81.41	737	121	10	190	916	2798606	2797876	0	681	1	S
SMAC_Scaffolded_contig_94622	gi|224381666|ref|NC_011462.1|NC_011462_TGU1	73.8	981	181	19	109	1070	2827409	2828332	1e-167	594	1	S
SMAC_Scaffolded_contig_13247	gi|224381666|ref|NC_011462.1|NC_011462_TGU1	70.92	3693	716	84	8212	11774	2839680	2836216	0	1763	9197	M
SMAC_Scaffolded_contig_61170	gi|224381666|ref|NC_011462.1|NC_011462_TGU1	75.33	523	98	9	1344	1863	2846150	2846644	4e-93	349	5	S
SMAC_Scaffolded_contig_111958	gi|224381666|ref|NC_011462.1|NC_011462_TGU1	77.69	3510	593	53	4082	7531	2854109	2857488	0	2733	3	S
SMAC_Scaffolded_contig_96304	gi|224381666|ref|NC_011462.1|NC_011462_TGU1	72.36	2243	430	49	1293	3408	2865071	2862892	0	1200	4	S
SMAC_Scaffolded_contig_96311	gi|224381666|ref|NC_011462.1|NC_011462_TGU1	75.06	1171	233	24	3283	4430	2871883	2873017	0	740	583	M
SMAC_Scaffolded_contig_146252	gi|224381666|ref|NC_011462.1|NC_011462_TGU1	86.44	494	66	1	96	588	2875234	2875727	4e-165	585	1	S
SMAC_Scaffolded_contig_93787	gi|224381666|ref|NC_011462.1|NC_011462_TGU1	81.47	912	125	9	312	1204	2876496	2877382	0	883	6	M
SMAC_Scaffolded_contig_175299	gi|224381666|ref|NC_011462.1|NC_011462_TGU1	70.63	395	81	9	75	437	2899660	2899269	2e-43	181	1	S
SMAC_Scaffolded_contig_121850	gi|224381666|ref|NC_011462.1|NC_011462_TGU1	83.54	316	33	5	336	646	2900658	2900959	2e-88	331	1	S
SMAC_Scaffolded_contig_64844	gi|224381666|ref|NC_011462.1|NC_011462_TGU1	74.34	1769	289	33	18535	20245	2906479	2908140	0	1144	3220	M
SMAC_Scaffolded_contig_178860	gi|224381666|ref|NC_011462.1|NC_011462_TGU1	76.27	885	142	14	458	1321	2908986	2908149	0	648	2	S
SMAC_Scaffolded_contig_102105	gi|224381666|ref|NC_011462.1|NC_011462_TGU1	77.96	422	60	7	189	579	2916734	2916315	2e-91	340	1	S
SMAC_Scaffolded_contig_73111	gi|224381666|ref|NC_011462.1|NC_011462_TGU1	78.49	925	170	9	89	999	2917577	2918486	0	756	1	S
SMAC_Scaffolded_contig_87597	gi|224381666|ref|NC_011462.1|NC_011462_TGU1	73.06	1418	266	27	98	1488	2922373	2923701	0	818	3	M
SMAC_Scaffolded_contig_30737	gi|224381666|ref|NC_011462.1|NC_011462_TGU1	71.95	2171	377	48	4927	6932	2936126	2934023	0	1162	12	M
SMAC_Scaffolded_contig_30736	gi|224381666|ref|NC_011462.1|NC_011462_TGU1	78.08	1492	213	21	13269	14681	2948903	2950359	0	1225	12	M
SMAC_Scaffolded_contig_79509	gi|224381666|ref|NC_011462.1|NC_011462_TGU1	77.72	570	87	7	110	678	2956003	2955473	1e-126	461	8	M
SMAC_Scaffolded_contig_50377	gi|224381666|ref|NC_011462.1|NC_011462_TGU1	76.19	987	173	14	7878	8833	2961498	2960543	0	713	11	M
SMAC_Scaffolded_contig_89677	gi|224381666|ref|NC_011462.1|NC_011462_TGU1	74.07	2067	345	48	6730	8742	2965865	2967794	0	1267	590	M
SMAC_Scaffolded_contig_60588	gi|224381666|ref|NC_011462.1|NC_011462_TGU1	77.78	468	64	7	1	463	2971139	2971571	1e-102	379	6	M
SMAC_Scaffolded_contig_152805	gi|224381666|ref|NC_011462.1|NC_011462_TGU1	75.55	593	117	12	69	638	2975251	2974664	3e-105	387	1	S
SMAC_Scaffolded_contig_162841	gi|224381666|ref|NC_011462.1|NC_011462_TGU1	80.68	497	65	10	140	628	2978620	2979093	2e-123	446	1	S
SMAC_Scaffolded_contig_86516	gi|224381666|ref|NC_011462.1|NC_011462_TGU1	71.21	1431	244	33	8924	10308	2985648	2986956	0	726	15	M
SMAC_Scaffolded_contig_102901	gi|224381666|ref|NC_011462.1|NC_011462_TGU1	72.47	890	188	16	937	1799	2991252	2990393	3e-133	480	894	M
SMAC_Scaffolded_contig_79211	gi|224381666|ref|NC_011462.1|NC_011462_TGU1	79.74	2690	394	34	6540	9141	2992054	2994680	0	2378	2733	M
SMAC_Scaffolded_contig_187485	gi|224381666|ref|NC_011462.1|NC_011462_TGU1	77.27	220	37	5	33	242	3009718	3009502	1e-37	161	4	M
SMAC_Scaffolded_contig_105836	gi|224381666|ref|NC_011462.1|NC_011462_TGU1	75.36	1404	253	24	3820	5195	3011114	3012452	0	948	6	M
SMAC_Scaffolded_contig_81975	gi|224381666|ref|NC_011462.1|NC_011462_TGU1	74.85	1682	293	31	467	2084	3017813	3019428	0	1104	5	M
SMAC_Scaffolded_contig_112870	gi|224381666|ref|NC_011462.1|NC_011462_TGU1	70.07	3782	798	88	292	3929	3026611	3023020	0	1622	27	M
SMAC_Scaffolded_contig_149609	gi|224381666|ref|NC_011462.1|NC_011462_TGU1	81.9	210	30	2	3	206	3028267	3028060	3e-51	206	2	S
SMAC_Scaffolded_contig_138770	gi|224381666|ref|NC_011462.1|NC_011462_TGU1	69.42	412	104	5	22	428	3028391	3028785	8e-41	172	1	S
SMAC_Scaffolded_contig_2741	gi|224381666|ref|NC_011462.1|NC_011462_TGU1	75.39	512	105	10	12	507	3031575	3031069	2e-87	329	1	S
SMAC_Scaffolded_contig_2742	gi|224381666|ref|NC_011462.1|NC_011462_TGU1	74.13	2717	513	53	5	2654	3039305	3036712	0	1663	6	M
SMAC_Scaffolded_contig_175774	gi|224381666|ref|NC_011462.1|NC_011462_TGU1	69.88	1162	223	23	119	1218	3040551	3039455	5e-148	529	1	S
SMAC_Scaffolded_contig_42817	gi|224381666|ref|NC_011462.1|NC_011462_TGU1	68.12	1402	264	34	2078	3432	3047200	3045935	2e-146	526	6	M
SMAC_Scaffolded_contig_173340	gi|224381666|ref|NC_011462.1|NC_011462_TGU1	80	70	14	0	4839	4908	3050278	3050209	2e-07	64	15	M
SMAC_Scaffolded_contig_154182	gi|224381666|ref|NC_011462.1|NC_011462_TGU1	68.88	1446	317	30	4	1409	3052416	3053768	3e-158	563	2	M
SMAC_Scaffolded_contig_37376	gi|224381666|ref|NC_011462.1|NC_011462_TGU1	78.42	4652	710	77	1	4570	3060039	3055600	0	3781	5	M
SMAC_Scaffolded_contig_36893	gi|224381666|ref|NC_011462.1|NC_011462_TGU1	78.77	2228	342	30	35601	37785	3066213	3064074	0	1869	713	M
SMAC_Scaffolded_contig_123611	gi|224381666|ref|NC_011462.1|NC_011462_TGU1	78.82	1563	253	15	369	1894	3078867	3077346	0	1330	4	S
SMAC_Scaffolded_contig_68335	gi|224381666|ref|NC_011462.1|NC_011462_TGU1	77.85	1314	199	22	1	1236	3082275	3083574	0	1041	2	M
SMAC_Scaffolded_contig_178261	gi|224381666|ref|NC_011462.1|NC_011462_TGU1	76.26	358	76	4	1	349	3086631	3086274	3e-65	253	2	M
SMAC_Scaffolded_contig_19990	gi|224381666|ref|NC_011462.1|NC_011462_TGU1	78.9	2090	343	26	1683	3756	3112924	3110917	0	1752	27	M
SMAC_Scaffolded_contig_45703	gi|224381666|ref|NC_011462.1|NC_011462_TGU1	78.65	2286	323	39	7447	9663	3124057	3126246	0	1896	12	M
SMAC_Scaffolded_contig_8113	gi|224381666|ref|NC_011462.1|NC_011462_TGU1	83.06	1535	223	11	16988	18510	3140957	3142466	0	1581	5998	M
SMAC_Scaffolded_contig_157821	gi|224381666|ref|NC_011462.1|NC_011462_TGU1	74.68	1007	170	19	9	999	3143995	3144932	0	657	4	M
SMAC_Scaffolded_contig_35686	gi|224381666|ref|NC_011462.1|NC_011462_TGU1	76.66	2969	523	45	154	3034	3172183	3169297	0	2181	29	M
SMAC_Scaffolded_contig_149626	gi|224381666|ref|NC_011462.1|NC_011462_TGU1	72.2	446	45	10	171	580	3172564	3172966	1e-70	271	1	S
SMAC_Scaffolded_contig_161938	gi|224381666|ref|NC_011462.1|NC_011462_TGU1	90	40	3	1	198	236	3177339	3177300	0.0005	51	88	M
SMAC_Scaffolded_contig_37189	gi|224381666|ref|NC_011462.1|NC_011462_TGU1	77.42	2303	382	41	4144	6374	3193153	3190917	0	1748	6347	M
SMAC_Scaffolded_contig_21597	gi|224381666|ref|NC_011462.1|NC_011462_TGU1	79.14	1203	186	20	1	1170	3221125	3219955	0	1007	8	S
SMAC_Scaffolded_contig_111196	gi|224381666|ref|NC_011462.1|NC_011462_TGU1	73.47	4358	774	91	6865	11095	3222845	3226947	0	2581	5	S
SMAC_Scaffolded_contig_169860	gi|224381666|ref|NC_011462.1|NC_011462_TGU1	78.73	677	92	7	1	666	3224226	3224861	1e-165	587	1	S
SMAC_Scaffolded_contig_111197	gi|224381666|ref|NC_011462.1|NC_011462_TGU1	74.69	1537	261	25	1	1521	3226300	3224876	0	1021	1	S
SMAC_Scaffolded_contig_118967	gi|224381666|ref|NC_011462.1|NC_011462_TGU1	73.7	1749	317	37	820	2473	3230523	3228823	0	1043	3	S
SMAC_Scaffolded_contig_164220	gi|224381666|ref|NC_011462.1|NC_011462_TGU1	71.31	488	93	9	12	489	3232749	3232299	1e-64	251	2	S
SMAC_Scaffolded_contig_109793	gi|224381666|ref|NC_011462.1|NC_011462_TGU1	71.97	289	44	8	208	494	3233015	3232762	2e-35	154	1	S
SMAC_Scaffolded_contig_162764	gi|224381666|ref|NC_011462.1|NC_011462_TGU1	76.19	357	72	6	3	347	3233694	3233339	4e-63	246	1	S
SMAC_Scaffolded_contig_62428	gi|224381666|ref|NC_011462.1|NC_011462_TGU1	76.52	626	99	11	15	619	3234264	3233666	1e-127	461	1	S
SMAC_Scaffolded_contig_19156	gi|224381666|ref|NC_011462.1|NC_011462_TGU1	73.83	1907	376	41	1035	2924	3247470	3245670	0	1115	8518	M
SMAC_Scaffolded_contig_136267	gi|224381666|ref|NC_011462.1|NC_011462_TGU1	76.12	201	46	2	531	731	3260174	3260372	6e-31	140	1	S
SMAC_Scaffolded_contig_69180	gi|224381666|ref|NC_011462.1|NC_011462_TGU1	70.37	999	175	23	3187	4102	3263145	3264105	1e-130	473	2430	M
SMAC_Scaffolded_contig_111445	gi|224381666|ref|NC_011462.1|NC_011462_TGU1	75.52	241	40	7	1	239	3265549	3265326	2e-35	154	1	S
SMAC_Scaffolded_contig_111444	gi|224381666|ref|NC_011462.1|NC_011462_TGU1	74.03	1086	208	23	1262	2323	3266257	3267292	0	650	3	S
SMAC_Scaffolded_contig_35842	gi|224381666|ref|NC_011462.1|NC_011462_TGU1	73.68	1136	193	25	306	1407	3270292	3271355	0	684	1396	M
SMAC_Scaffolded_contig_38008	gi|224381666|ref|NC_011462.1|NC_011462_TGU1	68.46	501	116	9	2565	3051	3273948	3273476	7e-45	188	25	M
SMAC_Scaffolded_contig_141170	gi|224381666|ref|NC_011462.1|NC_011462_TGU1	69.37	751	145	22	606	1314	3274908	3275615	2e-77	295	6	M
SMAC_Scaffolded_contig_65834	gi|224381666|ref|NC_011462.1|NC_011462_TGU1	68.97	1115	234	22	2649	3709	3287461	3288517	1e-124	453	4	M
SMAC_Scaffolded_contig_167666	gi|224381666|ref|NC_011462.1|NC_011462_TGU1	69.79	854	205	17	307	1141	3290755	3289936	2e-93	349	3	S
SMAC_Scaffolded_contig_130682	gi|224381666|ref|NC_011462.1|NC_011462_TGU1	74.11	1236	231	27	2701	3898	3294791	3293607	0	746	6	M
SMAC_Scaffolded_contig_152149	gi|224381666|ref|NC_011462.1|NC_011462_TGU1	77.72	368	66	4	204	571	3296552	3296903	1e-76	291	1	S
SMAC_Scaffolded_contig_31001	gi|224381666|ref|NC_011462.1|NC_011462_TGU1	71.28	2079	423	50	6483	8531	3316703	3314769	0	989	12334	M
SMAC_Scaffolded_contig_159646	gi|224381666|ref|NC_011462.1|NC_011462_TGU1	71.03	1336	277	27	10	1338	3321697	3322929	0	643	6	S
SMAC_Scaffolded_contig_56714	gi|224381666|ref|NC_011462.1|NC_011462_TGU1	70.7	1420	265	31	177	1534	3326454	3327784	0	682	8	S
SMAC_Scaffolded_contig_141010	gi|224381666|ref|NC_011462.1|NC_011462_TGU1	69.17	2008	439	43	822	2719	3336391	3334454	0	800	2	S
SMAC_Scaffolded_contig_46990	gi|224381666|ref|NC_011462.1|NC_011462_TGU1	68.98	1776	329	43	13441	15140	3342563	3340934	0	726	11	M
SMAC_Scaffolded_contig_147533	gi|224381666|ref|NC_011462.1|NC_011462_TGU1	72.77	1212	232	25	37	1214	3349882	3348735	0	681	2	S
SMAC_Scaffolded_contig_190525	gi|224381666|ref|NC_011462.1|NC_011462_TGU1	78.02	91	18	2	419	508	3350072	3350161	2e-09	68	53	M
SMAC_Scaffolded_contig_49242	gi|224381666|ref|NC_011462.1|NC_011462_TGU1	69.51	2040	389	36	9865	11838	3364670	3362798	0	922	977	M
SMAC_Scaffolded_contig_3139	gi|224381666|ref|NC_011462.1|NC_011462_TGU1	76.15	3886	606	79	5371	9092	3396342	3392614	0	2762	1648	M
SMAC_Scaffolded_contig_119423	gi|224381666|ref|NC_011462.1|NC_011462_TGU1	77.99	259	48	5	1	251	3405761	3405504	1e-47	196	939	M
SMAC_Scaffolded_contig_134297	gi|224381666|ref|NC_011462.1|NC_011462_TGU1	85	40	6	0	240	279	3420985	3421024	0.006	46	60	M
SMAC_Scaffolded_contig_11429	gi|224381666|ref|NC_011462.1|NC_011462_TGU1	76.09	3166	461	68	25	3048	3426723	3429734	0	2257	2	S
SMAC_Scaffolded_contig_11428	gi|224381666|ref|NC_011462.1|NC_011462_TGU1	76.44	7398	1107	138	6339	13547	3431042	3424092	0	5434	801	M
SMAC_Scaffolded_contig_44645	gi|224381666|ref|NC_011462.1|NC_011462_TGU1	81.93	166	30	0	47	212	3439875	3440040	9e-38	165	1	S
SMAC_Scaffolded_contig_137291	gi|224381666|ref|NC_011462.1|NC_011462_TGU1	69.48	947	181	21	937	1846	3472081	3471206	2e-111	408	2	S
SMAC_Scaffolded_contig_11943	gi|224381666|ref|NC_011462.1|NC_011462_TGU1	74.63	3740	640	95	25079	28700	3473538	3477086	0	2316	2830	M
SMAC_Scaffolded_contig_99465	gi|224381666|ref|NC_011462.1|NC_011462_TGU1	75.05	954	133	19	1965	2895	3479524	3480395	0	657	5	M
SMAC_Scaffolded_contig_104619	gi|224381666|ref|NC_011462.1|NC_011462_TGU1	76.34	93	18	1	132	220	3490779	3490687	2e-09	68	39	M
SMAC_Scaffolded_contig_25849	gi|224381666|ref|NC_011462.1|NC_011462_TGU1	77.13	3573	577	63	4926	8376	3494378	3490924	0	2693	4	S
SMAC_Scaffolded_contig_17244	gi|224381666|ref|NC_011462.1|NC_011462_TGU1	72.47	3462	586	78	239	3600	3513004	3509810	0	1927	687	M
SMAC_Scaffolded_contig_12672	gi|224381666|ref|NC_011462.1|NC_011462_TGU1	74.52	3073	521	64	2348	5320	3521417	3518507	0	1959	28	M
SMAC_Scaffolded_contig_134934	gi|224381666|ref|NC_011462.1|NC_011462_TGU1	69.17	1038	215	25	43	1050	3525464	3524502	2e-112	412	1	S
SMAC_Scaffolded_contig_22086	gi|224381666|ref|NC_011462.1|NC_011462_TGU1	73.51	5429	976	119	2731	7977	3534754	3539902	0	3187	35	M
SMAC_Scaffolded_contig_105356	gi|224381666|ref|NC_011462.1|NC_011462_TGU1	71.84	586	106	9	83	666	3541541	3541013	7e-87	325	1	S
SMAC_Scaffolded_contig_164667	gi|224381666|ref|NC_011462.1|NC_011462_TGU1	77.05	597	94	12	4	577	3542564	3543140	9e-123	444	2	M
SMAC_Scaffolded_contig_82159	gi|224381666|ref|NC_011462.1|NC_011462_TGU1	71.23	1008	182	20	1	934	3542583	3541610	1e-144	518	2	M
SMAC_Scaffolded_contig_106112	gi|224381666|ref|NC_011462.1|NC_011462_TGU1	86.84	38	3	1	672	707	3547624	3547587	0.041	44	60	M
SMAC_Scaffolded_contig_176486	gi|224381666|ref|NC_011462.1|NC_011462_TGU1	74.29	1229	206	24	26	1183	3554675	3555864	0	783	1	S
SMAC_Scaffolded_contig_79753	gi|224381666|ref|NC_011462.1|NC_011462_TGU1	70.71	560	115	12	505	1045	3556427	3555898	3e-67	260	2	S
SMAC_Scaffolded_contig_77145	gi|224381666|ref|NC_011462.1|NC_011462_TGU1	76.25	539	69	13	22	532	3558263	3557756	2e-106	390	1	S
SMAC_Scaffolded_contig_178823	gi|224381666|ref|NC_011462.1|NC_011462_TGU1	68.72	179	32	4	337	515	3560298	3560144	6e-11	75	421	M
SMAC_Scaffolded_contig_22085	gi|224381666|ref|NC_011462.1|NC_011462_TGU1	75.44	1722	293	34	125	1831	3574867	3573261	0	1162	3	S
SMAC_Scaffolded_contig_16359	gi|224381666|ref|NC_011462.1|NC_011462_TGU1	80.67	8661	1128	121	6517	14897	3587105	3595499	0	8019	10382	M
SMAC_Scaffolded_contig_8124	gi|224381666|ref|NC_011462.1|NC_011462_TGU1	72.66	2385	458	47	1916	4238	3626977	3624725	0	1324	4	S
SMAC_Scaffolded_contig_109355	gi|224381666|ref|NC_011462.1|NC_011462_TGU1	70.48	1216	226	32	269	1451	3635282	3634167	5e-154	551	85	M
SMAC_Scaffolded_contig_32947	gi|224381666|ref|NC_011462.1|NC_011462_TGU1	74.54	2109	364	34	18888	20917	3681017	3683031	0	1386	57	M
SMAC_Scaffolded_contig_134292	gi|224381666|ref|NC_011462.1|NC_011462_TGU1	81.11	180	32	2	1	180	3692930	3692753	1e-37	165	2	S
SMAC_Scaffolded_contig_32948	gi|224381666|ref|NC_011462.1|NC_011462_TGU1	73.63	3401	613	56	4795	8051	3705106	3701846	0	2093	7228	M
SMAC_Scaffolded_contig_75943	gi|224381666|ref|NC_011462.1|NC_011462_TGU1	72.03	1895	337	45	7401	9241	3721185	3719430	0	1000	144	M
SMAC_Scaffolded_contig_26173	gi|224381666|ref|NC_011462.1|NC_011462_TGU1	71.47	687	135	20	1560	2230	3736238	3736879	9e-85	320	4	S
SMAC_Scaffolded_contig_102895	gi|224381666|ref|NC_011462.1|NC_011462_TGU1	68.61	771	162	16	887	1606	3738155	3737414	9e-79	300	6	S
SMAC_Scaffolded_contig_108602	gi|224381666|ref|NC_011462.1|NC_011462_TGU1	73.02	1275	285	24	1957	3209	3742360	3743597	0	693	5	S
SMAC_Scaffolded_contig_24138	gi|224381666|ref|NC_011462.1|NC_011462_TGU1	62.34	640	149	18	73	681	3748422	3747844	2e-09	69	103	M
SMAC_Scaffolded_contig_24137	gi|224381666|ref|NC_011462.1|NC_011462_TGU1	77.3	1797	341	30	2662	4439	3750919	3752667	0	1326	113	M
SMAC_Scaffolded_contig_4	gi|224381666|ref|NC_011462.1|NC_011462_TGU1	77.19	228	34	3	3622	3849	3769705	3769914	6e-42	179	704	M
SMAC_Scaffolded_contig_82331	gi|224381666|ref|NC_011462.1|NC_011462_TGU1	79.73	148	6	4	302	449	3785443	3785320	5e-30	136	1	S
SMAC_Scaffolded_contig_48940	gi|224381666|ref|NC_011462.1|NC_011462_TGU1	73.42	3329	561	69	31418	34613	3792034	3795171	0	1995	9434	M
SMAC_Scaffolded_contig_28845	gi|224381666|ref|NC_011462.1|NC_011462_TGU1	75.42	1770	306	38	247	1958	3802522	3804220	0	1177	12	M
SMAC_Scaffolded_contig_177882	gi|224381666|ref|NC_011462.1|NC_011462_TGU1	71.5	614	145	12	171	768	3807215	3807814	1e-76	291	2	S
SMAC_Scaffolded_contig_154530	gi|224381666|ref|NC_011462.1|NC_011462_TGU1	78.76	485	81	9	801	1277	3813997	3813527	2e-105	390	3	S
SMAC_Scaffolded_contig_28844	gi|224381666|ref|NC_011462.1|NC_011462_TGU1	76.16	1212	232	22	1684	2868	3817513	3818694	0	836	337	M
SMAC_Scaffolded_contig_48350	gi|224381666|ref|NC_011462.1|NC_011462_TGU1	70.5	1173	165	31	973	2047	3834034	3832945	5e-163	580	4	S
SMAC_Scaffolded_contig_19419	gi|224381666|ref|NC_011462.1|NC_011462_TGU1	77.49	5065	787	93	14594	19537	3839546	3844378	0	3894	369	M
SMAC_Scaffolded_contig_107294	gi|224381666|ref|NC_011462.1|NC_011462_TGU1	73.02	1290	256	25	3922	5168	3880979	3882219	0	728	6	S
SMAC_Scaffolded_contig_37847	gi|224381666|ref|NC_011462.1|NC_011462_TGU1	75.56	941	165	17	25	951	3884459	3885348	0	643	4	S
SMAC_Scaffolded_contig_50505	gi|224381666|ref|NC_011462.1|NC_011462_TGU1	75.57	2104	384	33	414	2441	3889649	3891698	0	1445	585	M
SMAC_Scaffolded_contig_7420	gi|224381666|ref|NC_011462.1|NC_011462_TGU1	84.68	111	17	0	1138	1248	3907245	3907355	1e-25	123	118	M
SMAC_Scaffolded_contig_126363	gi|224381666|ref|NC_011462.1|NC_011462_TGU1	75.56	135	32	1	4792	4926	3918796	3918663	2e-15	91	7	M
SMAC_Scaffolded_contig_65192	gi|224381666|ref|NC_011462.1|NC_011462_TGU1	74.54	2231	412	40	10613	12787	3922551	3920421	0	1424	31	M
SMAC_Scaffolded_contig_142395	gi|224381666|ref|NC_011462.1|NC_011462_TGU1	73.78	2086	364	38	729	2737	3934292	3932313	0	1290	4	M
SMAC_Scaffolded_contig_8412	gi|224381666|ref|NC_011462.1|NC_011462_TGU1	87.88	33	4	0	76	108	3936488	3936520	0.18	42	26	M
SMAC_Scaffolded_contig_20289	gi|224381666|ref|NC_011462.1|NC_011462_TGU1	88.89	36	4	0	745	780	3941983	3942018	0.009	48	79	M
SMAC_Scaffolded_contig_89126	gi|224381666|ref|NC_011462.1|NC_011462_TGU1	70.62	2597	504	65	1	2470	3947233	3944769	0	1184	5	M
SMAC_Scaffolded_contig_56476	gi|224381666|ref|NC_011462.1|NC_011462_TGU1	75.24	2153	382	39	1508	3616	3951400	3949355	0	1440	7909	M
SMAC_Scaffolded_contig_77734	gi|224381666|ref|NC_011462.1|NC_011462_TGU1	69.52	2126	394	55	1965	3965	3954624	3956620	0	893	3	S
SMAC_Scaffolded_contig_183966	gi|224381666|ref|NC_011462.1|NC_011462_TGU1	73.35	559	107	9	2	557	3959846	3959327	3e-96	356	1	S
SMAC_Scaffolded_contig_103743	gi|224381666|ref|NC_011462.1|NC_011462_TGU1	72.98	1769	316	33	3436	5130	3968461	3970141	0	1032	3	S
SMAC_Scaffolded_contig_137409	gi|224381666|ref|NC_011462.1|NC_011462_TGU1	72.42	1414	255	30	166	1530	3972282	3970955	0	778	7703	M
SMAC_Scaffolded_contig_115565	gi|224381666|ref|NC_011462.1|NC_011462_TGU1	71.81	3416	617	80	5639	8873	3975537	3972287	0	1770	10	M
SMAC_Scaffolded_contig_106218	gi|224381666|ref|NC_011462.1|NC_011462_TGU1	73.13	1027	181	20	63	1059	3981442	3982403	5e-170	603	2	S
SMAC_Scaffolded_contig_191564	gi|224381666|ref|NC_011462.1|NC_011462_TGU1	71.28	289	52	6	250	508	3982686	3982973	7e-34	149	2	S
SMAC_Scaffolded_contig_177787	gi|224381666|ref|NC_011462.1|NC_011462_TGU1	69.37	875	160	24	1	842	3983950	3983151	4e-97	360	2	M
SMAC_Scaffolded_contig_7396	gi|224381666|ref|NC_011462.1|NC_011462_TGU1	74.02	2929	563	60	768	3614	3985218	3988030	0	1759	2514	M
SMAC_Scaffolded_contig_132065	gi|224381666|ref|NC_011462.1|NC_011462_TGU1	67.99	528	128	14	250	761	3995895	3996397	4e-39	167	1	S
SMAC_Scaffolded_contig_115772	gi|224381666|ref|NC_011462.1|NC_011462_TGU1	77.14	538	107	6	1762	2289	4002741	4003272	1e-109	403	2	S
SMAC_Scaffolded_contig_103715	gi|224381666|ref|NC_011462.1|NC_011462_TGU1	89.66	58	5	1	40	97	4013149	4013093	5e-11	75	8	M
SMAC_Scaffolded_contig_165851	gi|224381666|ref|NC_011462.1|NC_011462_TGU1	73.44	418	84	7	602	999	4019002	4018592	7e-63	246	2	S
SMAC_Scaffolded_contig_90426	gi|224381666|ref|NC_011462.1|NC_011462_TGU1	74.02	893	164	16	1658	2530	4024076	4023232	3e-155	554	2	S
SMAC_Scaffolded_contig_2790	gi|224381666|ref|NC_011462.1|NC_011462_TGU1	72.88	5040	897	97	24253	29112	4042466	4037717	0	2913	16355	M
SMAC_Scaffolded_contig_32170	gi|224381666|ref|NC_011462.1|NC_011462_TGU1	72.89	1881	350	29	461	2309	4049138	4047386	0	1106	2	S
SMAC_Scaffolded_contig_178740	gi|224381666|ref|NC_011462.1|NC_011462_TGU1	74.31	728	130	14	33	738	4071008	4071700	5e-127	459	2	M
SMAC_Scaffolded_contig_24925	gi|224381666|ref|NC_011462.1|NC_011462_TGU1	66.92	1182	260	34	502	1650	4075187	4076270	4e-89	334	2	S
SMAC_Scaffolded_contig_24924	gi|224381666|ref|NC_011462.1|NC_011462_TGU1	73.7	3068	552	78	4658	7627	4088542	4085632	0	1773	1141	M
SMAC_Scaffolded_contig_41043	gi|224381666|ref|NC_011462.1|NC_011462_TGU1	90.7	43	4	0	7806	7848	4096002	4095960	5e-06	60	602	M
SMAC_Scaffolded_contig_157217	gi|224381666|ref|NC_011462.1|NC_011462_TGU1	76.58	2216	369	41	1	2146	4103844	4105979	0	1608	4	S
SMAC_Scaffolded_contig_26991	gi|224381666|ref|NC_011462.1|NC_011462_TGU1	75	96	20	2	71	163	4107360	4107266	4e-07	60	17	M
SMAC_Scaffolded_contig_62478	gi|224381666|ref|NC_011462.1|NC_011462_TGU1	82.39	142	24	1	4246	4386	4124348	4124489	3e-30	140	302	M
SMAC_Scaffolded_contig_122330	gi|224381666|ref|NC_011462.1|NC_011462_TGU1	81.75	137	24	1	1659	1794	4124360	4124496	7e-28	131	126	M
SMAC_Scaffolded_contig_47535	gi|224381666|ref|NC_011462.1|NC_011462_TGU1	85.61	132	19	0	1	132	4124499	4124368	8e-35	152	872	M
SMAC_Scaffolded_contig_32527	gi|224381666|ref|NC_011462.1|NC_011462_TGU1	77.19	5471	859	90	14111	19424	4125943	4131181	0	4185	234	M
SMAC_Scaffolded_contig_112903	gi|224381666|ref|NC_011462.1|NC_011462_TGU1	72.65	980	157	29	2	923	4135030	4134104	7e-151	540	6	S
SMAC_Scaffolded_contig_57979	gi|224381666|ref|NC_011462.1|NC_011462_TGU1	72.98	2446	447	60	1165	3474	4139107	4136740	0	1353	4	S
SMAC_Scaffolded_contig_122360	gi|224381666|ref|NC_011462.1|NC_011462_TGU1	70.02	617	107	18	5	587	4140032	4139460	1e-69	268	2	S
SMAC_Scaffolded_contig_52942	gi|224381666|ref|NC_011462.1|NC_011462_TGU1	75.35	2917	496	60	7082	9886	4144737	4141932	0	1950	15	S
SMAC_Scaffolded_contig_134586	gi|224381666|ref|NC_011462.1|NC_011462_TGU1	76.08	878	151	20	124	974	4155892	4156737	3e-169	600	1	S
SMAC_Scaffolded_contig_189203	gi|224381666|ref|NC_011462.1|NC_011462_TGU1	81.25	144	25	2	28	170	4160523	4160381	2e-28	131	1	S
SMAC_Scaffolded_contig_3299	gi|224381666|ref|NC_011462.1|NC_011462_TGU1	78.03	4933	703	71	3450	8151	4164005	4168787	0	4033	4959	M
SMAC_Scaffolded_contig_157299	gi|224381666|ref|NC_011462.1|NC_011462_TGU1	76.58	1533	250	31	34	1517	4171617	4170145	0	1104	2	S
SMAC_Scaffolded_contig_70113	gi|224381666|ref|NC_011462.1|NC_011462_TGU1	71.04	2448	464	62	34	2388	4212861	4210566	0	1160	6	M
SMAC_Scaffolded_contig_139300	gi|224381666|ref|NC_011462.1|NC_011462_TGU1	65.68	440	112	11	288	722	4217558	4217153	2e-18	98	56	M
SMAC_Scaffolded_contig_139895	gi|224381666|ref|NC_011462.1|NC_011462_TGU1	79.55	88	15	1	1139	1223	4241547	4241460	9e-12	77	93	M
SMAC_Scaffolded_contig_56311	gi|224381666|ref|NC_011462.1|NC_011462_TGU1	76.04	288	59	6	81	367	4255007	4255285	9e-46	190	183	M
SMAC_Scaffolded_contig_54131	gi|224381666|ref|NC_011462.1|NC_011462_TGU1	77.42	62	12	1	301	362	4256003	4255944	0.006	46	16	M
SMAC_Scaffolded_contig_170770	gi|224381666|ref|NC_011462.1|NC_011462_TGU1	67.45	553	105	17	7	531	4271016	4271521	2e-42	178	1	S
SMAC_Scaffolded_contig_11007	gi|224381666|ref|NC_011462.1|NC_011462_TGU1	83.94	2734	263	54	18732	21401	4273887	4276508	0	2866	6906	M
SMAC_Scaffolded_contig_42208	gi|224381666|ref|NC_011462.1|NC_011462_TGU1	73.85	2084	334	43	22	1995	4307625	4309607	0	1297	3	S
SMAC_Scaffolded_contig_13860	gi|224381666|ref|NC_011462.1|NC_011462_TGU1	78.76	339	58	8	3	332	4312832	4312499	1e-68	264	1	S
SMAC_Scaffolded_contig_12066	gi|224381666|ref|NC_011462.1|NC_011462_TGU1	85.11	94	12	2	2084	2177	4335521	4335430	2e-18	100	1719	M
SMAC_Scaffolded_contig_3672	gi|224381666|ref|NC_011462.1|NC_011462_TGU1	73.2	3467	668	74	35404	38786	4351354	4354643	0	1966	4946	M
SMAC_Scaffolded_contig_9177	gi|224381666|ref|NC_011462.1|NC_011462_TGU1	74.78	805	153	12	705	1497	4359285	4358519	4e-147	527	3	S
SMAC_Scaffolded_contig_43357	gi|224381666|ref|NC_011462.1|NC_011462_TGU1	78.71	1066	180	17	3	1034	4370072	4371124	0	865	2	S
SMAC_Scaffolded_contig_78363	gi|224381666|ref|NC_011462.1|NC_011462_TGU1	79.17	456	85	7	654	1107	4374916	4374469	8e-101	372	3	S
SMAC_Scaffolded_contig_42185	gi|224381666|ref|NC_011462.1|NC_011462_TGU1	82.06	652	111	4	655	1301	4378090	4377440	7e-180	636	1590	M
SMAC_Scaffolded_contig_51983	gi|224381666|ref|NC_011462.1|NC_011462_TGU1	74.35	4085	714	79	16659	20599	4386354	4390248	0	2587	8893	M
SMAC_Scaffolded_contig_15870	gi|224381666|ref|NC_011462.1|NC_011462_TGU1	74.77	7048	1214	145	22185	29025	4418398	4425088	0	4549	3362	M
SMAC_Scaffolded_contig_73208	gi|224381666|ref|NC_011462.1|NC_011462_TGU1	88.52	61	6	1	1	60	4430987	4431047	2e-11	75	3521	M
SMAC_Scaffolded_contig_93644	gi|224381666|ref|NC_011462.1|NC_011462_TGU1	70.44	653	132	14	15	653	4449748	4450353	2e-79	300	2	M
SMAC_Scaffolded_contig_105274	gi|224381666|ref|NC_011462.1|NC_011462_TGU1	85.22	291	32	4	35	314	4450392	4450682	4e-86	324	2	S
SMAC_Scaffolded_contig_18309	gi|224381666|ref|NC_011462.1|NC_011462_TGU1	74.53	7012	1191	126	25757	32535	4463324	4469973	0	4562	14	M
SMAC_Scaffolded_contig_81244	gi|224381666|ref|NC_011462.1|NC_011462_TGU1	80.58	12907	1706	179	2094	14683	4471810	4484232	0	11890	8	M
SMAC_Scaffolded_contig_20155	gi|224381666|ref|NC_011462.1|NC_011462_TGU1	78.04	3916	660	49	7200	11041	4492079	4495868	0	3144	19	M
SMAC_Scaffolded_contig_68884	gi|224381666|ref|NC_011462.1|NC_011462_TGU1	73.71	1457	250	31	611	2008	4496808	4498190	0	881	4	M
SMAC_Scaffolded_contig_78438	gi|224381666|ref|NC_011462.1|NC_011462_TGU1	73.42	2445	467	48	486	2872	4507587	4509906	0	1427	3	S
SMAC_Scaffolded_contig_9816	gi|224381666|ref|NC_011462.1|NC_011462_TGU1	79.07	927	160	7	3729	4653	4515549	4514655	0	796	9	M
SMAC_Scaffolded_contig_124561	gi|224381666|ref|NC_011462.1|NC_011462_TGU1	77.34	428	73	5	489	904	4516137	4515722	2e-89	334	2	S
SMAC_Scaffolded_contig_152109	gi|224381666|ref|NC_011462.1|NC_011462_TGU1	78.57	238	46	5	91	326	4516773	4517007	1e-43	181	2196	M
SMAC_Scaffolded_contig_98811	gi|224381666|ref|NC_011462.1|NC_011462_TGU1	76.37	182	38	3	1	178	4516820	4517000	1e-28	132	16	M
SMAC_Scaffolded_contig_117346	gi|224381666|ref|NC_011462.1|NC_011462_TGU1	82.73	110	19	0	1	110	4516846	4516955	3e-22	113	1	S
SMAC_Scaffolded_contig_3899	gi|224381666|ref|NC_011462.1|NC_011462_TGU1	81.55	168	28	2	1553	1719	4516848	4517013	1e-35	158	1570	M
SMAC_Scaffolded_contig_43677	gi|224381666|ref|NC_011462.1|NC_011462_TGU1	83.77	154	20	3	23	175	4516854	4517003	3e-35	156	1299	M
SMAC_Scaffolded_contig_19325	gi|224381666|ref|NC_011462.1|NC_011462_TGU1	83.56	146	21	3	9204	9347	4516860	4517004	2e-31	145	421	M
SMAC_Scaffolded_contig_164199	gi|224381666|ref|NC_011462.1|NC_011462_TGU1	79.71	138	22	2	1	137	4516868	4517000	1e-24	120	3	M
SMAC_Scaffolded_contig_63199	gi|224381666|ref|NC_011462.1|NC_011462_TGU1	82.91	158	20	5	241	392	4516868	4517024	3e-33	147	376	M
SMAC_Scaffolded_contig_58747	gi|224381666|ref|NC_011462.1|NC_011462_TGU1	83.52	91	15	0	309	399	4516868	4516958	7e-18	96	11311	M
SMAC_Scaffolded_contig_91638	gi|224381666|ref|NC_011462.1|NC_011462_TGU1	81.48	135	22	3	1	133	4516871	4517004	5e-25	120	11	M
SMAC_Scaffolded_contig_185271	gi|224381666|ref|NC_011462.1|NC_011462_TGU1	82.02	89	16	0	298	386	4516872	4516960	7e-16	89	10546	M
SMAC_Scaffolded_contig_43168	gi|224381666|ref|NC_011462.1|NC_011462_TGU1	82.2	118	20	1	27	143	4516879	4516996	3e-23	114	2	M
SMAC_Scaffolded_contig_21920	gi|224381666|ref|NC_011462.1|NC_011462_TGU1	82.65	98	16	1	532	628	4516953	4516856	5e-18	96	13296	M
SMAC_Scaffolded_contig_41821	gi|224381666|ref|NC_011462.1|NC_011462_TGU1	93.75	48	3	0	7933	7980	4516958	4516911	8e-10	73	6915	M
SMAC_Scaffolded_contig_17057	gi|224381666|ref|NC_011462.1|NC_011462_TGU1	80.95	126	21	2	1283	1405	4516996	4516871	5e-22	113	2	M
SMAC_Scaffolded_contig_5979	gi|224381666|ref|NC_011462.1|NC_011462_TGU1	83.23	161	24	3	8828	8986	4516998	4516839	5e-35	158	950	M
SMAC_Scaffolded_contig_73445	gi|224381666|ref|NC_011462.1|NC_011462_TGU1	82.31	130	20	3	1130	1257	4517001	4516873	2e-24	120	15	M
SMAC_Scaffolded_contig_85590	gi|224381666|ref|NC_011462.1|NC_011462_TGU1	89.77	88	8	1	3638	3724	4517004	4516917	1e-22	114	2	S
SMAC_Scaffolded_contig_115138	gi|224381666|ref|NC_011462.1|NC_011462_TGU1	83.97	131	16	4	484	610	4517005	4516876	8e-28	129	155	M
SMAC_Scaffolded_contig_99970	gi|224381666|ref|NC_011462.1|NC_011462_TGU1	90.62	32	3	0	528	559	4517016	4516985	0.024	44	188	M
SMAC_Scaffolded_contig_80247	gi|224381666|ref|NC_011462.1|NC_011462_TGU1	76.63	2692	439	43	1522	4155	4518923	4521482	0	1997	8	S
SMAC_Scaffolded_contig_20565	gi|224381666|ref|NC_011462.1|NC_011462_TGU1	76.38	1414	248	20	11165	12549	4531604	4530248	0	1032	6283	M
SMAC_Scaffolded_contig_101495	gi|224381666|ref|NC_011462.1|NC_011462_TGU1	69.95	2582	439	64	7	2481	4534286	4531935	0	1173	1	S
SMAC_Scaffolded_contig_53063	gi|224381666|ref|NC_011462.1|NC_011462_TGU1	82.35	85	15	0	1113	1197	4538093	4538177	3e-14	86	5099	M
SMAC_Scaffolded_contig_163003	gi|224381666|ref|NC_011462.1|NC_011462_TGU1	83.87	62	8	2	4679	4739	4544151	4544091	3e-06	60	368	M
SMAC_Scaffolded_contig_10853	gi|224381666|ref|NC_011462.1|NC_011462_TGU1	77.3	3811	628	69	10564	14286	4544274	4547935	0	2875	5953	M
SMAC_Scaffolded_contig_111867	gi|224381666|ref|NC_011462.1|NC_011462_TGU1	81.33	1398	222	16	21	1401	4545649	4544274	0	1308	2	S
SMAC_Scaffolded_contig_29890	gi|224381666|ref|NC_011462.1|NC_011462_TGU1	73.97	3938	599	87	2427	6273	4552370	4555972	0	2473	32065	M
SMAC_Scaffolded_contig_40856	gi|224381666|ref|NC_011462.1|NC_011462_TGU1	78.35	2083	304	37	4945	6961	4586636	4588637	0	1689	6	M
SMAC_Scaffolded_contig_79713	gi|224381666|ref|NC_011462.1|NC_011462_TGU1	74.09	1679	291	36	3864	5509	4590817	4592384	0	1034	3	M
SMAC_Scaffolded_contig_156406	gi|224381666|ref|NC_011462.1|NC_011462_TGU1	74.09	957	174	23	12	933	4592380	4593297	1e-160	571	2	M
SMAC_Scaffolded_contig_25797	gi|224381666|ref|NC_011462.1|NC_011462_TGU1	73.47	3208	623	61	2435	5552	4595698	4598767	0	1880	9645	M
SMAC_Scaffolded_contig_128760	gi|224381666|ref|NC_011462.1|NC_011462_TGU1	77.87	1116	164	20	1349	2421	4626297	4627372	0	884	2	S
SMAC_Scaffolded_contig_68941	gi|224381666|ref|NC_011462.1|NC_011462_TGU1	71.39	2342	416	54	1	2279	4636690	4634540	0	1189	6	M
SMAC_Scaffolded_contig_93608	gi|224381666|ref|NC_011462.1|NC_011462_TGU1	79.84	625	106	10	123	735	4650666	4650050	8e-149	533	31	M
SMAC_Scaffolded_contig_12346	gi|224381666|ref|NC_011462.1|NC_011462_TGU1	71.56	1885	371	41	1163	2997	4656982	4655213	0	948	3693	M
SMAC_Scaffolded_contig_77773	gi|224381666|ref|NC_011462.1|NC_011462_TGU1	74.55	672	111	16	64	723	4659480	4660103	8e-116	423	3	M
SMAC_Scaffolded_contig_52794	gi|224381666|ref|NC_011462.1|NC_011462_TGU1	76.5	532	90	11	22	532	4663711	4664228	2e-102	378	2	M
SMAC_Scaffolded_contig_182283	gi|224381666|ref|NC_011462.1|NC_011462_TGU1	72.89	1033	161	21	35	998	4678707	4679689	1e-173	614	1	S
SMAC_Scaffolded_contig_83420	gi|224381666|ref|NC_011462.1|NC_011462_TGU1	74.57	763	155	16	331	1075	4684609	4683868	3e-128	464	250	M
SMAC_Scaffolded_contig_104402	gi|224381666|ref|NC_011462.1|NC_011462_TGU1	74.55	613	122	13	126	727	4693300	4692711	1e-101	374	18	M
SMAC_Scaffolded_contig_185763	gi|224381666|ref|NC_011462.1|NC_011462_TGU1	73.78	511	70	10	576	1077	4693613	4694068	2e-88	331	2	S
SMAC_Scaffolded_contig_15378	gi|224381666|ref|NC_011462.1|NC_011462_TGU1	75.1	3105	453	69	35059	38069	4694252	4697130	0	2093	23394	M
SMAC_Scaffolded_contig_187871	gi|224381666|ref|NC_011462.1|NC_011462_TGU1	69.87	302	76	6	1	298	4704600	4704310	2e-25	122	2	M
SMAC_Scaffolded_contig_30387	gi|224381666|ref|NC_011462.1|NC_011462_TGU1	68.4	1832	324	53	2	1684	4708290	4710015	0	686	987	M
SMAC_Scaffolded_contig_22929	gi|224381666|ref|NC_011462.1|NC_011462_TGU1	75.06	5184	947	97	412	5365	4716254	4721321	0	3395	6	M
SMAC_Scaffolded_contig_125227	gi|224381666|ref|NC_011462.1|NC_011462_TGU1	74.34	2124	373	44	7848	9923	4729418	4727419	0	1330	52	M
SMAC_Scaffolded_contig_169290	gi|224381666|ref|NC_011462.1|NC_011462_TGU1	77.26	853	122	22	5812	6617	4739677	4740504	1e-177	630	9	M
SMAC_Scaffolded_contig_186616	gi|224381666|ref|NC_011462.1|NC_011462_TGU1	74.96	635	107	13	2	611	4741468	4740861	1e-114	417	2	M
SMAC_Scaffolded_contig_172158	gi|224381666|ref|NC_011462.1|NC_011462_TGU1	75.76	264	52	3	56	310	4744234	4743974	2e-44	185	3	M
SMAC_Scaffolded_contig_153082	gi|224381666|ref|NC_011462.1|NC_011462_TGU1	73.43	1340	250	27	206	1502	4745767	4744491	0	785	2	M
SMAC_Scaffolded_contig_64042	gi|224381666|ref|NC_011462.1|NC_011462_TGU1	75.8	3033	577	49	5281	8267	4746967	4749888	0	2082	8	M
SMAC_Scaffolded_contig_37474	gi|224381666|ref|NC_011462.1|NC_011462_TGU1	71.53	5170	957	112	13879	18901	4768674	4763873	0	2646	7344	M
SMAC_Scaffolded_contig_135889	gi|224381666|ref|NC_011462.1|NC_011462_TGU1	78.46	455	72	13	169	606	4783795	4783350	2e-92	343	2	M
SMAC_Scaffolded_contig_84741	gi|224381666|ref|NC_011462.1|NC_011462_TGU1	73.77	2402	370	63	5533	7815	4784110	4786370	0	1442	8	M
SMAC_Scaffolded_contig_43191	gi|224381666|ref|NC_011462.1|NC_011462_TGU1	75.66	2864	498	57	2989	5772	4792164	4794908	0	1945	1167	M
SMAC_Scaffolded_contig_87600	gi|224381666|ref|NC_011462.1|NC_011462_TGU1	81.3	369	51	7	602	965	4802739	4802384	4e-91	340	2	S
SMAC_Scaffolded_contig_89786	gi|224381666|ref|NC_011462.1|NC_011462_TGU1	72.5	2880	511	65	263	3022	4806631	4803913	0	1584	3	S
SMAC_Scaffolded_contig_41174	gi|224381666|ref|NC_011462.1|NC_011462_TGU1	74.4	1539	286	35	4437	5929	4810299	4811775	0	939	9	M
SMAC_Scaffolded_contig_6640	gi|224381666|ref|NC_011462.1|NC_011462_TGU1	74.09	7032	1161	153	10362	17143	4831685	4825065	0	4374	12743	M
SMAC_Scaffolded_contig_143355	gi|224381666|ref|NC_011462.1|NC_011462_TGU1	81.38	1085	128	21	99	1174	4837757	4838776	0	1018	2	S
SMAC_Scaffolded_contig_37850	gi|224381666|ref|NC_011462.1|NC_011462_TGU1	75.81	4514	747	95	1	4305	4840571	4844948	0	3101	4048	M
SMAC_Scaffolded_contig_111813	gi|224381666|ref|NC_011462.1|NC_011462_TGU1	80	110	18	2	64	169	4846506	4846397	0	95	1662	M
SMAC_Scaffolded_contig_2058	gi|224381666|ref|NC_011462.1|NC_011462_TGU1	72.77	415	104	5	590	999	4846533	4846943	4e-60	237	581	M
SMAC_Scaffolded_contig_32661	gi|224381666|ref|NC_011462.1|NC_011462_TGU1	76.55	371	83	3	5679	6048	4846533	4846900	4e-68	268	2555	M
SMAC_Scaffolded_contig_75946	gi|224381666|ref|NC_011462.1|NC_011462_TGU1	74.63	406	96	5	2220	2622	4846535	4846936	5e-64	251	1256	M
SMAC_Scaffolded_contig_110751	gi|224381666|ref|NC_011462.1|NC_011462_TGU1	79.01	243	48	3	829	1068	4846548	4846790	2e-47	197	819	M
SMAC_Scaffolded_contig_44421	gi|224381666|ref|NC_011462.1|NC_011462_TGU1	77.05	305	55	4	429	718	4846579	4846883	4e-58	230	1061	M
SMAC_Scaffolded_contig_4032	gi|224381666|ref|NC_011462.1|NC_011462_TGU1	78.7	399	66	11	41275	41667	4846589	4846974	2e-78	304	2227	M
SMAC_Scaffolded_contig_59835	gi|224381666|ref|NC_011462.1|NC_011462_TGU1	76.68	343	72	5	6367	6706	4846607	4846944	3e-64	253	1316	M
SMAC_Scaffolded_contig_53131	gi|224381666|ref|NC_011462.1|NC_011462_TGU1	78.08	333	68	3	296	627	4846616	4846944	6e-68	262	2352	M
SMAC_Scaffolded_contig_104985	gi|224381666|ref|NC_011462.1|NC_011462_TGU1	75.72	313	56	8	1567	1866	4846621	4846926	1e-49	205	385	M
SMAC_Scaffolded_contig_17178	gi|224381666|ref|NC_011462.1|NC_011462_TGU1	79.6	348	64	5	700	1044	4846631	4846974	2e-76	291	3576	M
SMAC_Scaffolded_contig_121247	gi|224381666|ref|NC_011462.1|NC_011462_TGU1	77.24	290	59	4	211	498	4846693	4846977	8e-53	214	661	M
SMAC_Scaffolded_contig_97314	gi|224381666|ref|NC_011462.1|NC_011462_TGU1	77.86	131	28	1	1	131	4846720	4846591	1e-19	102	1944	M
SMAC_Scaffolded_contig_54013	gi|224381666|ref|NC_011462.1|NC_011462_TGU1	83.64	110	17	1	2658	2767	4846766	4846874	1e-22	114	6	M
SMAC_Scaffolded_contig_86666	gi|224381666|ref|NC_011462.1|NC_011462_TGU1	81.51	146	26	1	561	705	4846768	4846913	2e-30	138	14	M
SMAC_Scaffolded_contig_11269	gi|224381666|ref|NC_011462.1|NC_011462_TGU1	74.54	216	53	2	265	479	4846770	4846984	2e-28	134	6	M
SMAC_Scaffolded_contig_108188	gi|224381666|ref|NC_011462.1|NC_011462_TGU1	81.38	145	25	1	3151	3293	4846800	4846944	9e-30	138	37	M
SMAC_Scaffolded_contig_58055	gi|224381666|ref|NC_011462.1|NC_011462_TGU1	78.26	345	68	5	17	355	4846885	4846542	2e-69	268	2046	M
SMAC_Scaffolded_contig_106316	gi|224381666|ref|NC_011462.1|NC_011462_TGU1	79.57	235	43	5	8	238	4846886	4846653	3e-46	190	473	M
SMAC_Scaffolded_contig_106459	gi|224381666|ref|NC_011462.1|NC_011462_TGU1	78.28	290	54	4	1371	1653	4846893	4846606	3e-57	230	327	M
SMAC_Scaffolded_contig_18735	gi|224381666|ref|NC_011462.1|NC_011462_TGU1	71.79	390	98	6	4113	4491	4846898	4846510	2e-50	208	409	M
SMAC_Scaffolded_contig_6417	gi|224381666|ref|NC_011462.1|NC_011462_TGU1	72.56	481	106	9	51	507	4846898	4846420	3e-65	255	698	M
SMAC_Scaffolded_contig_40353	gi|224381666|ref|NC_011462.1|NC_011462_TGU1	72.25	537	135	8	5897	6428	4846912	4846385	5e-70	273	3697	M
SMAC_Scaffolded_contig_134405	gi|224381666|ref|NC_011462.1|NC_011462_TGU1	76.47	187	30	3	145	320	4846919	4846736	1e-30	138	17	M
SMAC_Scaffolded_contig_49118	gi|224381666|ref|NC_011462.1|NC_011462_TGU1	76.61	171	29	4	1	162	4846920	4846752	4e-25	120	12	M
SMAC_Scaffolded_contig_105264	gi|224381666|ref|NC_011462.1|NC_011462_TGU1	83.65	159	22	2	637	795	4846921	4846767	1e-38	165	668	M
SMAC_Scaffolded_contig_47469	gi|224381666|ref|NC_011462.1|NC_011462_TGU1	73.79	351	86	4	1	349	4846921	4846575	2e-52	215	1018	M
SMAC_Scaffolded_contig_27063	gi|224381666|ref|NC_011462.1|NC_011462_TGU1	72.34	376	96	6	1	372	4846926	4846555	2e-49	203	259	M
SMAC_Scaffolded_contig_73190	gi|224381666|ref|NC_011462.1|NC_011462_TGU1	78.96	309	56	5	1006	1308	4846931	4846626	8e-64	250	845	M
SMAC_Scaffolded_contig_133961	gi|224381666|ref|NC_011462.1|NC_011462_TGU1	77.6	192	36	4	1	189	4846932	4846745	1e-31	141	47	M
SMAC_Scaffolded_contig_113959	gi|224381666|ref|NC_011462.1|NC_011462_TGU1	72.12	165	31	3	202	353	4846932	4846770	4e-16	91	11495	M
SMAC_Scaffolded_contig_45188	gi|224381666|ref|NC_011462.1|NC_011462_TGU1	69.97	313	79	5	145	444	4846933	4846623	1e-28	132	8	M
SMAC_Scaffolded_contig_71619	gi|224381666|ref|NC_011462.1|NC_011462_TGU1	71.88	224	58	3	1	222	4846933	4846713	6e-27	127	8990	M
SMAC_Scaffolded_contig_7695	gi|224381666|ref|NC_011462.1|NC_011462_TGU1	80	200	34	4	1	199	4846938	4846744	3e-39	168	138	M
SMAC_Scaffolded_contig_13988	gi|224381666|ref|NC_011462.1|NC_011462_TGU1	68.51	343	57	5	10607	10901	4846944	4846605	1e-34	156	102	M
SMAC_Scaffolded_contig_50702	gi|224381666|ref|NC_011462.1|NC_011462_TGU1	72.35	293	68	3	4	284	4846944	4846653	5e-41	174	178	M
SMAC_Scaffolded_contig_13713	gi|224381666|ref|NC_011462.1|NC_011462_TGU1	72.12	416	100	8	1011	1411	4846976	4846562	5e-50	206	182	M
SMAC_Scaffolded_contig_168300	gi|224381666|ref|NC_011462.1|NC_011462_TGU1	77.93	435	90	4	1	433	4846976	4846546	3e-91	340	3584	M
SMAC_Scaffolded_contig_126760	gi|224381666|ref|NC_011462.1|NC_011462_TGU1	73.52	287	63	5	2323	2597	4846982	4846697	6e-38	165	96	M
SMAC_Scaffolded_contig_20928	gi|224381666|ref|NC_011462.1|NC_011462_TGU1	71.81	415	88	13	849	1241	4846982	4846575	7e-45	188	78	M
SMAC_Scaffolded_contig_80808	gi|224381666|ref|NC_011462.1|NC_011462_TGU1	81.16	207	34	3	1	206	4846986	4846784	5e-45	188	1610	M
SMAC_Scaffolded_contig_65664	gi|224381666|ref|NC_011462.1|NC_011462_TGU1	76.53	213	47	3	241	451	4846987	4846776	2e-33	149	31	M
SMAC_Scaffolded_contig_54592	gi|224381666|ref|NC_011462.1|NC_011462_TGU1	77.37	1790	258	29	757	2531	4874997	4873340	0	1404	2272	M
SMAC_Scaffolded_contig_54593	gi|224381666|ref|NC_011462.1|NC_011462_TGU1	75.03	1438	233	28	1	1403	4875684	4877030	0	962	4375	M
SMAC_Scaffolded_contig_93852	gi|224381666|ref|NC_011462.1|NC_011462_TGU1	76.63	612	91	15	2949	3553	4881206	4880640	3e-120	439	4	S
SMAC_Scaffolded_contig_60000	gi|224381666|ref|NC_011462.1|NC_011462_TGU1	75.6	2049	352	48	559	2527	4883332	4885312	0	1359	11	M
SMAC_Scaffolded_contig_42025	gi|224381666|ref|NC_011462.1|NC_011462_TGU1	86.33	1266	85	16	6179	7431	4895740	4896930	0	1510	2174	M
SMAC_Scaffolded_contig_49771	gi|224381666|ref|NC_011462.1|NC_011462_TGU1	72.04	3287	567	81	4505	7615	4907172	4910282	0	1737	9	S
SMAC_Scaffolded_contig_55227	gi|224381666|ref|NC_011462.1|NC_011462_TGU1	82.65	392	48	4	793	1179	4911257	4910881	2e-109	401	4	S
SMAC_Scaffolded_contig_20501	gi|224381666|ref|NC_011462.1|NC_011462_TGU1	73.17	3183	552	66	11386	14417	4934230	4931199	0	1865	628	M
SMAC_Scaffolded_contig_65648	gi|224381666|ref|NC_011462.1|NC_011462_TGU1	70.22	2995	607	71	22056	24909	4964072	4966922	0	1317	1960	M
SMAC_Scaffolded_contig_33392	gi|224381666|ref|NC_011462.1|NC_011462_TGU1	74.77	3349	654	67	78	3349	4992794	4989560	0	2100	15	M
SMAC_Scaffolded_contig_32625	gi|224381666|ref|NC_011462.1|NC_011462_TGU1	71.39	3394	615	86	15123	18425	5006925	5010053	0	1676	12910	M
SMAC_Scaffolded_contig_31245	gi|224381666|ref|NC_011462.1|NC_011462_TGU1	70.4	3963	699	95	24187	28079	5032179	5028621	0	1858	11313	M
SMAC_Scaffolded_contig_74752	gi|224381666|ref|NC_011462.1|NC_011462_TGU1	81.63	49	9	0	1539	1587	5032941	5032989	0.008	48	117	M
SMAC_Scaffolded_contig_29125	gi|224381666|ref|NC_011462.1|NC_011462_TGU1	73.65	2133	356	53	3154	5184	5049253	5051281	0	1260	2	S
SMAC_Scaffolded_contig_51100	gi|224381666|ref|NC_011462.1|NC_011462_TGU1	73.76	2069	363	39	1300	3311	5052839	5054784	0	1270	181	M
SMAC_Scaffolded_contig_185943	gi|224381666|ref|NC_011462.1|NC_011462_TGU1	79.77	346	46	4	4820	5142	5054783	5055127	3e-82	313	1	S
SMAC_Scaffolded_contig_33200	gi|224381666|ref|NC_011462.1|NC_011462_TGU1	76.51	1503	246	34	3024	4479	5057146	5055704	0	1063	5	M
SMAC_Scaffolded_contig_53290	gi|224381666|ref|NC_011462.1|NC_011462_TGU1	75.69	5953	977	113	54281	59991	5071239	5065515	0	4127	16202	M
SMAC_Scaffolded_contig_188099	gi|224381666|ref|NC_011462.1|NC_011462_TGU1	76.34	355	57	4	179	523	5078617	5078280	1e-69	268	1	S
SMAC_Scaffolded_contig_9550	gi|224381666|ref|NC_011462.1|NC_011462_TGU1	77.82	2029	301	25	19	2002	5078947	5080871	0	1653	81	M
SMAC_Scaffolded_contig_88153	gi|224381666|ref|NC_011462.1|NC_011462_TGU1	80.91	838	134	11	1140	1966	5093044	5092222	0	764	6	M
SMAC_Scaffolded_contig_99883	gi|224381666|ref|NC_011462.1|NC_011462_TGU1	82.11	1090	130	19	915	1985	5104630	5103587	0	1059	4	M
SMAC_Scaffolded_contig_128201	gi|224381666|ref|NC_011462.1|NC_011462_TGU1	80.18	1564	270	15	1	1537	5115616	5114066	0	1391	2	M
SMAC_Scaffolded_contig_7160	gi|224381666|ref|NC_011462.1|NC_011462_TGU1	72.97	4691	881	92	1736	6262	5126569	5131036	0	2677	3	M
SMAC_Scaffolded_contig_91288	gi|224381666|ref|NC_011462.1|NC_011462_TGU1	95.12	41	2	0	2210	2250	5139469	5139509	3e-08	66	6996	M
SMAC_Scaffolded_contig_86770	gi|224381666|ref|NC_011462.1|NC_011462_TGU1	73.97	972	212	19	11	962	5140961	5140011	7e-158	563	485	M
SMAC_Scaffolded_contig_162647	gi|224381666|ref|NC_011462.1|NC_011462_TGU1	75.57	929	152	18	748	1623	5145151	5146057	0	639	3	S
SMAC_Scaffolded_contig_34738	gi|224381666|ref|NC_011462.1|NC_011462_TGU1	77.2	2781	485	50	18170	20885	5151004	5153700	0	2066	463	M
SMAC_Scaffolded_contig_59037	gi|224381666|ref|NC_011462.1|NC_011462_TGU1	75.99	3419	570	63	3728	7062	5158677	5155426	0	2406	6	M
SMAC_Scaffolded_contig_59036	gi|224381666|ref|NC_011462.1|NC_011462_TGU1	71.94	1536	316	42	167	1651	5163013	5164484	0	742	1	S
SMAC_Scaffolded_contig_11919	gi|224381666|ref|NC_011462.1|NC_011462_TGU1	78.1	1224	218	15	997	2199	5166409	5165215	0	976	5	S
SMAC_Scaffolded_contig_11920	gi|224381666|ref|NC_011462.1|NC_011462_TGU1	71.94	2726	524	64	1	2644	5167447	5170013	0	1397	3	M
SMAC_Scaffolded_contig_173519	gi|224381666|ref|NC_011462.1|NC_011462_TGU1	73.75	621	108	9	2	617	5172719	5172149	2e-107	394	2	S
SMAC_Scaffolded_contig_147922	gi|224381666|ref|NC_011462.1|NC_011462_TGU1	74.32	623	108	11	2	603	5173924	5173333	3e-111	407	1	S
SMAC_Scaffolded_contig_27164	gi|224381666|ref|NC_011462.1|NC_011462_TGU1	75.6	2754	450	49	5138	7798	5174185	5176809	0	1916	11377	M
SMAC_Scaffolded_contig_108390	gi|224381666|ref|NC_011462.1|NC_011462_TGU1	75.66	2954	511	49	1085	3923	5194009	5196869	0	2053	16272	M
SMAC_Scaffolded_contig_155514	gi|224381666|ref|NC_011462.1|NC_011462_TGU1	79.58	1381	217	18	1	1364	5196079	5194747	0	1196	2	M
SMAC_Scaffolded_contig_83354	gi|224381666|ref|NC_011462.1|NC_011462_TGU1	84.15	1609	183	19	6749	8314	5216420	5217999	0	1759	1788	M
SMAC_Scaffolded_contig_184190	gi|224381666|ref|NC_011462.1|NC_011462_TGU1	72.88	365	87	3	35	399	5220832	5221184	3e-52	210	1	S
SMAC_Scaffolded_contig_82514	gi|224381666|ref|NC_011462.1|NC_011462_TGU1	75.29	263	48	7	1941	2190	5223654	5223912	4e-38	165	1	S
SMAC_Scaffolded_contig_99329	gi|224381666|ref|NC_011462.1|NC_011462_TGU1	93.18	44	3	0	4873	4916	5226301	5226344	7e-08	66	4079	M
SMAC_Scaffolded_contig_45037	gi|224381666|ref|NC_011462.1|NC_011462_TGU1	69.72	2639	476	54	9966	12444	5229465	5226990	0	1205	7907	M
SMAC_Scaffolded_contig_115404	gi|224381666|ref|NC_011462.1|NC_011462_TGU1	76.05	405	74	9	1	395	5230978	5230587	4e-71	273	2092	M
SMAC_Scaffolded_contig_147825	gi|224381666|ref|NC_011462.1|NC_011462_TGU1	75.23	650	121	14	1	633	5231138	5231764	3e-115	419	1	S
SMAC_Scaffolded_contig_114852	gi|224381666|ref|NC_011462.1|NC_011462_TGU1	77.3	1339	231	23	71	1361	5259885	5261198	0	1007	2	M
SMAC_Scaffolded_contig_155081	gi|224381666|ref|NC_011462.1|NC_011462_TGU1	83.15	2213	292	25	18	2196	5274406	5272241	0	2269	2	M
SMAC_Scaffolded_contig_1110	gi|224381666|ref|NC_011462.1|NC_011462_TGU1	79.25	13197	1993	209	51729	64519	5301996	5289139	0	11190	7626	M
SMAC_Scaffolded_contig_103550	gi|224381666|ref|NC_011462.1|NC_011462_TGU1	73.78	1144	197	16	29	1120	5302232	5303324	0	731	3	M
SMAC_Scaffolded_contig_3937	gi|224381666|ref|NC_011462.1|NC_011462_TGU1	79.02	367	71	4	8767	9130	5307596	5307233	1e-78	302	5198	M
SMAC_Scaffolded_contig_156693	gi|224381666|ref|NC_011462.1|NC_011462_TGU1	77.76	1142	180	21	19	1145	5327254	5326172	0	886	1	S
SMAC_Scaffolded_contig_92654	gi|224381666|ref|NC_011462.1|NC_011462_TGU1	79.18	413	64	9	503	897	5330046	5329638	6e-90	336	4	M
SMAC_Scaffolded_contig_153714	gi|224381666|ref|NC_011462.1|NC_011462_TGU1	78.45	682	134	7	59	737	5333302	5333973	1e-153	547	1	S
SMAC_Scaffolded_contig_11653	gi|224381666|ref|NC_011462.1|NC_011462_TGU1	78.03	2048	355	28	2300	4298	5352409	5354410	0	1624	4	S
SMAC_Scaffolded_contig_115991	gi|224381666|ref|NC_011462.1|NC_011462_TGU1	76.48	3737	656	58	5034	8665	5363482	5367100	0	2717	7	M
SMAC_Scaffolded_contig_156287	gi|224381666|ref|NC_011462.1|NC_011462_TGU1	73.65	1647	280	25	2279	3832	5368997	5367412	0	1040	2	S
SMAC_Scaffolded_contig_151972	gi|224381666|ref|NC_011462.1|NC_011462_TGU1	77.87	1080	170	14	71	1085	5371726	5370651	0	870	1	S
SMAC_Scaffolded_contig_154797	gi|224381666|ref|NC_011462.1|NC_011462_TGU1	77.89	674	111	12	12	668	5373141	5372489	3e-146	524	2	S
SMAC_Scaffolded_contig_59147	gi|224381666|ref|NC_011462.1|NC_011462_TGU1	75.17	1724	305	24	2735	4422	5374841	5376477	0	1182	2	S
SMAC_Scaffolded_contig_33950	gi|224381666|ref|NC_011462.1|NC_011462_TGU1	80.26	1814	288	16	1126	2909	5378797	5380570	0	1649	4220	M
SMAC_Scaffolded_contig_28814	gi|224381666|ref|NC_011462.1|NC_011462_TGU1	73.42	2506	435	47	10116	12556	5385830	5383491	0	1514	57	M
SMAC_Scaffolded_contig_174560	gi|224381666|ref|NC_011462.1|NC_011462_TGU1	76.43	314	52	4	435	741	5387800	5388098	1e-59	235	583	M
SMAC_Scaffolded_contig_149401	gi|224381666|ref|NC_011462.1|NC_011462_TGU1	69.48	367	91	10	502	859	5388214	5387860	5e-28	131	9	M
SMAC_Scaffolded_contig_153272	gi|224381666|ref|NC_011462.1|NC_011462_TGU1	82.61	46	7	1	644	688	5391841	5391796	0.034	44	65	M
SMAC_Scaffolded_contig_138189	gi|224381666|ref|NC_011462.1|NC_011462_TGU1	76.14	788	144	15	1057	1824	5393863	5394626	1e-152	545	2	S
SMAC_Scaffolded_contig_132814	gi|224381666|ref|NC_011462.1|NC_011462_TGU1	75.92	2164	348	35	5773	7876	5394685	5396735	0	1552	2	S
SMAC_Scaffolded_contig_135965	gi|224381666|ref|NC_011462.1|NC_011462_TGU1	72.93	4085	751	83	1	3957	5400696	5396839	0	2327	2	S
SMAC_Scaffolded_contig_79821	gi|224381666|ref|NC_011462.1|NC_011462_TGU1	77.58	1780	286	27	1689	3395	5402424	5400685	0	1391	3	S
SMAC_Scaffolded_contig_79822	gi|224381666|ref|NC_011462.1|NC_011462_TGU1	78.28	2159	309	42	3	2104	5404512	5406567	0	1734	1	S
SMAC_Scaffolded_contig_74850	gi|224381666|ref|NC_011462.1|NC_011462_TGU1	76.54	3001	499	59	3318	6254	5410714	5413573	0	2158	6	S
SMAC_Scaffolded_contig_192765	gi|224381666|ref|NC_011462.1|NC_011462_TGU1	84.21	38	6	0	68	105	5414618	5414655	0.076	42	29	M
SMAC_Scaffolded_contig_47132	gi|224381666|ref|NC_011462.1|NC_011462_TGU1	73.74	575	89	19	355	916	5417522	5416997	5e-87	327	1006	M
SMAC_Scaffolded_contig_54512	gi|224381666|ref|NC_011462.1|NC_011462_TGU1	74.35	1528	247	38	1410	2834	5417611	5419096	0	948	55	M
SMAC_Scaffolded_contig_40284	gi|224381666|ref|NC_011462.1|NC_011462_TGU1	77.29	1048	190	12	2719	3747	5421852	5420834	0	807	1093	M
SMAC_Scaffolded_contig_105925	gi|224381666|ref|NC_011462.1|NC_011462_TGU1	72.7	1945	350	36	73	2006	5436196	5434422	0	1115	1	S
SMAC_Scaffolded_contig_96602	gi|224381666|ref|NC_011462.1|NC_011462_TGU1	74.4	871	160	19	1375	2238	5440019	5440833	1e-149	536	6548	M
SMAC_Scaffolded_contig_74608	gi|224381666|ref|NC_011462.1|NC_011462_TGU1	82.74	168	25	4	732	897	5443879	5444044	6e-36	158	1156	M
SMAC_Scaffolded_contig_97917	gi|224381666|ref|NC_011462.1|NC_011462_TGU1	85.19	81	11	1	1531	1610	5444020	5443940	2e-15	89	8662	M
SMAC_Scaffolded_contig_2112	gi|224381666|ref|NC_011462.1|NC_011462_TGU1	81.58	152	26	2	2929	3079	5444070	5443920	2e-30	141	141	M
SMAC_Scaffolded_contig_15432	gi|224381666|ref|NC_011462.1|NC_011462_TGU1	76.16	281	52	4	5122	5395	5444221	5443949	1e-48	201	1484	M
SMAC_Scaffolded_contig_26787	gi|224381666|ref|NC_011462.1|NC_011462_TGU1	87.41	2248	199	26	1	2224	5447330	5445143	0	2736	6853	M
SMAC_Scaffolded_contig_152603	gi|224381666|ref|NC_011462.1|NC_011462_TGU1	78.95	912	143	16	3	883	5451129	5452022	0	751	2	M
SMAC_Scaffolded_contig_86885	gi|224381666|ref|NC_011462.1|NC_011462_TGU1	82.67	3705	436	59	3	3629	5451245	5447669	0	3707	2	M
SMAC_Scaffolded_contig_124301	gi|224381666|ref|NC_011462.1|NC_011462_TGU1	81.98	555	77	10	9	552	5452402	5452944	5e-147	526	2	S
SMAC_Scaffolded_contig_79154	gi|224381666|ref|NC_011462.1|NC_011462_TGU1	74.7	2992	492	61	9100	11947	5464297	5461427	0	1947	17	M
SMAC_Scaffolded_contig_178813	gi|224381666|ref|NC_011462.1|NC_011462_TGU1	73.95	311	60	5	1	308	5473025	5473317	7e-47	192	2	M
SMAC_Scaffolded_contig_151693	gi|224381666|ref|NC_011462.1|NC_011462_TGU1	78.83	137	21	2	289	417	5477211	5477347	3e-23	114	1	S
SMAC_Scaffolded_contig_20243	gi|224381666|ref|NC_011462.1|NC_011462_TGU1	89.66	2002	159	17	3921	5913	5490687	5488725	0	2645	17020	M
SMAC_Scaffolded_contig_20244	gi|224381666|ref|NC_011462.1|NC_011462_TGU1	73.88	2500	396	52	974	3371	5494757	5497101	0	1563	14	M
SMAC_Scaffolded_contig_69127	gi|224381666|ref|NC_011462.1|NC_011462_TGU1	81.67	982	116	20	5	967	5498072	5497136	0	928	1	S
SMAC_Scaffolded_contig_68976	gi|224381666|ref|NC_011462.1|NC_011462_TGU1	86.31	548	68	6	23	565	5499070	5498525	3e-178	630	400	M
SMAC_Scaffolded_contig_37970	gi|224381666|ref|NC_011462.1|NC_011462_TGU1	72.15	4604	824	111	1	4378	5500171	5504542	0	2435	1538	M
SMAC_Scaffolded_contig_142705	gi|224381666|ref|NC_011462.1|NC_011462_TGU1	75.4	1138	152	23	44	1126	5511616	5512680	0	801	2	M
SMAC_Scaffolded_contig_179702	gi|224381666|ref|NC_011462.1|NC_011462_TGU1	72.92	528	72	11	4	475	5522386	5521874	9e-86	322	1	S
SMAC_Scaffolded_contig_124147	gi|224381666|ref|NC_011462.1|NC_011462_TGU1	74.23	2150	392	44	57	2137	5525649	5523593	0	1328	1	S
SMAC_Scaffolded_contig_182924	gi|224381666|ref|NC_011462.1|NC_011462_TGU1	68.73	275	56	5	458	732	5525942	5526186	8e-23	113	2	S
SMAC_Scaffolded_contig_115045	gi|224381666|ref|NC_011462.1|NC_011462_TGU1	75.51	633	114	14	592	1207	5528388	5528996	3e-114	417	1	S
SMAC_Scaffolded_contig_162644	gi|224381666|ref|NC_011462.1|NC_011462_TGU1	100	26	0	0	1278	1303	5532160	5532185	0.005	48	102	M
SMAC_Scaffolded_contig_67036	gi|224381666|ref|NC_011462.1|NC_011462_TGU1	76.46	2596	440	58	25506	28013	5536571	5534059	0	1820	4121	M
SMAC_Scaffolded_contig_144168	gi|224381666|ref|NC_011462.1|NC_011462_TGU1	73.5	1317	255	25	33	1321	5539080	5540330	0	774	1	S
SMAC_Scaffolded_contig_177839	gi|224381666|ref|NC_011462.1|NC_011462_TGU1	71.95	385	75	9	58	418	5540206	5540581	5e-48	197	2	S
SMAC_Scaffolded_contig_178536	gi|224381666|ref|NC_011462.1|NC_011462_TGU1	72.02	1065	198	29	1	1017	5548055	5549067	6e-153	545	1	S
SMAC_Scaffolded_contig_135055	gi|224381666|ref|NC_011462.1|NC_011462_TGU1	72.97	3045	517	76	1	2898	5548070	5545185	0	1714	1	S
SMAC_Scaffolded_contig_37505	gi|224381666|ref|NC_011462.1|NC_011462_TGU1	72.29	599	106	13	3	581	5554410	5554968	2e-87	327	1	S
SMAC_Scaffolded_contig_149246	gi|224381666|ref|NC_011462.1|NC_011462_TGU1	69.94	509	113	12	314	794	5558695	5559191	4e-52	210	2	S
SMAC_Scaffolded_contig_157014	gi|224381666|ref|NC_011462.1|NC_011462_TGU1	70.8	654	144	18	5	639	5561559	5562184	4e-73	280	2	S
SMAC_Scaffolded_contig_139249	gi|224381666|ref|NC_011462.1|NC_011462_TGU1	68.17	1065	240	32	236	1272	5564399	5565392	3e-90	338	2	S
SMAC_Scaffolded_contig_186148	gi|224381666|ref|NC_011462.1|NC_011462_TGU1	68.63	848	172	20	98	897	5566556	5567357	8e-87	325	1	S
SMAC_Scaffolded_contig_78047	gi|224381666|ref|NC_011462.1|NC_011462_TGU1	72.54	1289	266	30	2639	3882	5571973	5570728	0	673	521	M
SMAC_Scaffolded_contig_105436	gi|224381666|ref|NC_011462.1|NC_011462_TGU1	71.36	2367	482	44	1	2275	5577129	5574867	0	1191	1	S
SMAC_Scaffolded_contig_53469	gi|224381666|ref|NC_011462.1|NC_011462_TGU1	73.31	1735	304	45	2438	4123	5586605	5584981	0	982	270	M
SMAC_Scaffolded_contig_156047	gi|224381666|ref|NC_011462.1|NC_011462_TGU1	73.37	2452	471	52	1	2341	5589571	5591951	0	1407	2	M
SMAC_Scaffolded_contig_114031	gi|224381666|ref|NC_011462.1|NC_011462_TGU1	71.2	3504	684	83	1	3359	5589871	5593194	0	1689	1	S
SMAC_Scaffolded_contig_96831	gi|224381666|ref|NC_011462.1|NC_011462_TGU1	74.61	3875	700	68	1312	5070	5597204	5593498	0	2520	3	S
SMAC_Scaffolded_contig_96830	gi|224381666|ref|NC_011462.1|NC_011462_TGU1	81.43	70	12	1	484	553	5599549	5599617	3e-08	64	17	M
SMAC_Scaffolded_contig_53555	gi|224381666|ref|NC_011462.1|NC_011462_TGU1	67.87	635	125	18	484	1057	5599909	5600525	4e-53	215	1	S
SMAC_Scaffolded_contig_141406	gi|224381666|ref|NC_011462.1|NC_011462_TGU1	76.91	2317	368	44	489	2766	5612301	5610113	0	1719	11	M
SMAC_Scaffolded_contig_105681	gi|224381666|ref|NC_011462.1|NC_011462_TGU1	69.62	632	126	17	1	627	5612618	5613188	2e-66	257	1	S
SMAC_Scaffolded_contig_170060	gi|224381666|ref|NC_011462.1|NC_011462_TGU1	76.85	203	40	5	509	706	5617102	5616902	2e-30	138	19	M
SMAC_Scaffolded_contig_157680	gi|224381666|ref|NC_011462.1|NC_011462_TGU1	85.52	145	20	1	5873	6016	5617107	5616963	4e-37	163	3811	M
SMAC_Scaffolded_contig_77083	gi|224381666|ref|NC_011462.1|NC_011462_TGU1	79.81	1511	222	13	7027	8478	5620740	5622226	0	1366	13	M
SMAC_Scaffolded_contig_121944	gi|224381666|ref|NC_011462.1|NC_011462_TGU1	80.85	47	7	1	553	597	5622074	5622028	0.14	42	36	M
SMAC_Scaffolded_contig_93881	gi|224381666|ref|NC_011462.1|NC_011462_TGU1	83.59	835	107	10	858	1683	5628707	5627894	0	870	1659	M
SMAC_Scaffolded_contig_22266	gi|224381666|ref|NC_011462.1|NC_011462_TGU1	76.06	2531	402	51	18	2479	5629309	5631704	0	1786	7	M
SMAC_Scaffolded_contig_45800	gi|224381666|ref|NC_011462.1|NC_011462_TGU1	74.93	3127	538	70	6596	9672	5639030	5641960	0	2012	16086	M
SMAC_Scaffolded_contig_110409	gi|224381666|ref|NC_011462.1|NC_011462_TGU1	75.87	2080	363	38	1874	3896	5650615	5648618	0	1442	4222	M
SMAC_Scaffolded_contig_33575	gi|224381666|ref|NC_011462.1|NC_011462_TGU1	74.44	1921	346	39	7195	9090	5659644	5661444	0	1205	4028	M
SMAC_Scaffolded_contig_46343	gi|224381666|ref|NC_011462.1|NC_011462_TGU1	79.09	4002	577	57	3426	7306	5663589	5667451	0	3422	4	M
SMAC_Scaffolded_contig_183034	gi|224381666|ref|NC_011462.1|NC_011462_TGU1	85.03	167	24	1	2	167	5674286	5674452	9e-45	185	1	S
SMAC_Scaffolded_contig_22440	gi|224381666|ref|NC_011462.1|NC_011462_TGU1	75.68	7674	1265	135	14332	21724	5687076	5679723	0	5360	6306	M
SMAC_Scaffolded_contig_158283	gi|224381666|ref|NC_011462.1|NC_011462_TGU1	71.84	689	136	15	24	686	5701425	5702081	5e-95	352	1	S
SMAC_Scaffolded_contig_161112	gi|224381666|ref|NC_011462.1|NC_011462_TGU1	81.01	616	95	8	20	620	5702079	5702687	1e-159	567	1	S
SMAC_Scaffolded_contig_162177	gi|224381666|ref|NC_011462.1|NC_011462_TGU1	77.46	621	79	10	1	603	5706456	5705879	6e-139	499	1	S
SMAC_Scaffolded_contig_85279	gi|224381666|ref|NC_011462.1|NC_011462_TGU1	77.63	2374	386	36	1297	3561	5708776	5706439	0	1856	4	M
SMAC_Scaffolded_contig_64943	gi|224381666|ref|NC_011462.1|NC_011462_TGU1	76.52	907	166	17	452	1330	5713680	5714567	0	641	2	S
SMAC_Scaffolded_contig_160154	gi|224381666|ref|NC_011462.1|NC_011462_TGU1	78.09	607	96	11	220	812	5721876	5721293	5e-133	479	2	S
SMAC_Scaffolded_contig_61347	gi|224381666|ref|NC_011462.1|NC_011462_TGU1	71.88	2888	506	52	4783	7572	5724975	5722296	0	1590	12	M
SMAC_Scaffolded_contig_16337	gi|224381666|ref|NC_011462.1|NC_011462_TGU1	74.73	4690	835	67	4728	9268	5733103	5737591	0	3130	375	M
SMAC_Scaffolded_contig_150064	gi|224381666|ref|NC_011462.1|NC_011462_TGU1	79.61	1643	270	22	20	1647	5745916	5747508	0	1413	1	S
SMAC_Scaffolded_contig_115126	gi|224381666|ref|NC_011462.1|NC_011462_TGU1	75.32	2038	360	33	2458	4435	5749271	5751225	0	1388	2034	M
SMAC_Scaffolded_contig_86157	gi|224381666|ref|NC_011462.1|NC_011462_TGU1	69.99	1173	242	26	1593	2699	5762577	5761449	3e-142	511	3	S
SMAC_Scaffolded_contig_40831	gi|224381666|ref|NC_011462.1|NC_011462_TGU1	74.31	2783	500	58	5632	8312	5768015	5765346	0	1728	61	M
SMAC_Scaffolded_contig_77848	gi|224381666|ref|NC_011462.1|NC_011462_TGU1	70.39	966	166	20	3	897	5775148	5776064	9e-131	471	1	S
SMAC_Scaffolded_contig_96397	gi|224381666|ref|NC_011462.1|NC_011462_TGU1	74.98	1559	275	28	757	2276	5780285	5781767	0	1031	1	S
SMAC_Scaffolded_contig_103332	gi|224381666|ref|NC_011462.1|NC_011462_TGU1	74.6	2602	493	39	878	3405	5785470	5787977	0	1689	6	M
SMAC_Scaffolded_contig_46301	gi|224381666|ref|NC_011462.1|NC_011462_TGU1	81.56	1177	187	15	97	1256	5810557	5809394	0	1104	8	M
SMAC_Scaffolded_contig_116645	gi|224381666|ref|NC_011462.1|NC_011462_TGU1	71.59	1964	376	47	315	2187	5810623	5812495	0	978	4	M
SMAC_Scaffolded_contig_122902	gi|224381666|ref|NC_011462.1|NC_011462_TGU1	75.32	1771	301	40	1741	3426	5820270	5818551	0	1166	10	M
SMAC_Scaffolded_contig_108068	gi|224381666|ref|NC_011462.1|NC_011462_TGU1	74.89	912	156	15	981	1865	5822301	5823166	4e-172	610	2	S
SMAC_Scaffolded_contig_59151	gi|224381666|ref|NC_011462.1|NC_011462_TGU1	73.64	2151	437	39	9474	11566	5838269	5836191	0	1265	2465	M
SMAC_Scaffolded_contig_151683	gi|224381666|ref|NC_011462.1|NC_011462_TGU1	71.54	253	45	8	731	967	5846482	5846723	7e-25	120	1	S
SMAC_Scaffolded_contig_105658	gi|224381666|ref|NC_011462.1|NC_011462_TGU1	76.12	1030	167	18	1340	2358	5848839	5849800	0	738	6	M
SMAC_Scaffolded_contig_96713	gi|224381666|ref|NC_011462.1|NC_011462_TGU1	70.31	1044	206	22	1067	2089	5853534	5852574	4e-133	480	660	M
SMAC_Scaffolded_contig_72773	gi|224381666|ref|NC_011462.1|NC_011462_TGU1	76.12	1537	227	37	99	1600	5854981	5853550	0	1077	1	S
SMAC_Scaffolded_contig_58643	gi|224381666|ref|NC_011462.1|NC_011462_TGU1	77.04	1899	353	27	53	1923	5857219	5855376	0	1413	2	S
SMAC_Scaffolded_contig_192031	gi|224381666|ref|NC_011462.1|NC_011462_TGU1	69.59	467	98	13	16	462	5857901	5857459	3e-44	183	1	S
SMAC_Scaffolded_contig_58881	gi|224381666|ref|NC_011462.1|NC_011462_TGU1	76.14	1337	227	26	19	1311	5859773	5861061	0	939	84	M
SMAC_Scaffolded_contig_42450	gi|224381666|ref|NC_011462.1|NC_011462_TGU1	73	1459	247	30	30	1453	5859996	5858650	0	852	4	M
SMAC_Scaffolded_contig_100955	gi|224381666|ref|NC_011462.1|NC_011462_TGU1	74.4	3031	537	64	1117	4062	5865895	5868771	0	1894	13035	M
SMAC_Scaffolded_contig_107717	gi|224381666|ref|NC_011462.1|NC_011462_TGU1	76.44	1405	238	28	178	1547	5877217	5875871	0	1000	4	M
SMAC_Scaffolded_contig_121586	gi|224381666|ref|NC_011462.1|NC_011462_TGU1	71.35	1330	218	30	2	1219	5882007	5883285	0	693	1	S
SMAC_Scaffolded_contig_90273	gi|224381666|ref|NC_011462.1|NC_011462_TGU1	76.37	1443	213	25	33	1356	5882014	5880581	0	1068	5	S
SMAC_Scaffolded_contig_150958	gi|224381666|ref|NC_011462.1|NC_011462_TGU1	78.32	895	137	12	5	881	5884181	5883326	0	737	1	S
SMAC_Scaffolded_contig_156370	gi|224381666|ref|NC_011462.1|NC_011462_TGU1	72.82	298	57	7	243	522	5886160	5885869	4e-38	163	4	M
SMAC_Scaffolded_contig_94981	gi|224381666|ref|NC_011462.1|NC_011462_TGU1	75.47	587	102	12	684	1246	5886168	5886736	4e-107	394	2	S
SMAC_Scaffolded_contig_6304	gi|224381666|ref|NC_011462.1|NC_011462_TGU1	73.59	4297	778	82	1325	5549	5896964	5892953	0	2585	697	M
SMAC_Scaffolded_contig_79052	gi|224381666|ref|NC_011462.1|NC_011462_TGU1	74.57	3338	552	71	1140	4382	5899133	5902268	0	2140	19	M
SMAC_Scaffolded_contig_163070	gi|224381666|ref|NC_011462.1|NC_011462_TGU1	76.61	1804	330	39	1	1773	5913965	5912223	0	1258	2	S
SMAC_Scaffolded_contig_150683	gi|224381666|ref|NC_011462.1|NC_011462_TGU1	78.83	222	41	2	1901	2118	5914225	5914444	4e-44	185	1	S
SMAC_Scaffolded_contig_95383	gi|224381666|ref|NC_011462.1|NC_011462_TGU1	77.74	1042	171	9	4112	5132	5917256	5918257	0	848	83	M
SMAC_Scaffolded_contig_15511	gi|224381666|ref|NC_011462.1|NC_011462_TGU1	74.5	1392	266	35	831	2169	5932277	5930922	0	832	17857	M
SMAC_Scaffolded_contig_45803	gi|224381666|ref|NC_011462.1|NC_011462_TGU1	76.3	1405	272	27	1695	3080	5957275	5958637	0	966	8	M
SMAC_Scaffolded_contig_72619	gi|224381666|ref|NC_011462.1|NC_011462_TGU1	76.36	1231	219	23	701	1897	5958986	5960178	0	870	2549	M
SMAC_Scaffolded_contig_63200	gi|224381666|ref|NC_011462.1|NC_011462_TGU1	72.45	3288	608	69	9466	12623	5972588	5969469	0	1802	21	M
SMAC_Scaffolded_contig_67575	gi|224381666|ref|NC_011462.1|NC_011462_TGU1	79.17	1671	303	19	1349	2989	5987582	5985927	0	1400	622	M
SMAC_Scaffolded_contig_28377	gi|224381666|ref|NC_011462.1|NC_011462_TGU1	74.27	1547	243	40	1678	3113	5994153	5992651	0	955	11	M
SMAC_Scaffolded_contig_45350	gi|224381666|ref|NC_011462.1|NC_011462_TGU1	76.32	3822	669	57	7118	10848	6002343	5998667	0	2769	1281	M
SMAC_Scaffolded_contig_45647	gi|224381666|ref|NC_011462.1|NC_011462_TGU1	77.39	2096	343	24	1783	3849	6025923	6023930	0	1653	23	M
SMAC_Scaffolded_contig_88789	gi|224381666|ref|NC_011462.1|NC_011462_TGU1	74.23	3656	727	59	21	3581	6038808	6035273	0	2275	1850	M
SMAC_Scaffolded_contig_45319	gi|224381666|ref|NC_011462.1|NC_011462_TGU1	73.97	3626	639	76	450	3944	6039441	6042892	0	2215	249	M
SMAC_Scaffolded_contig_46915	gi|224381666|ref|NC_011462.1|NC_011462_TGU1	85.06	87	13	0	596	682	6042976	6042890	9e-18	98	12026	M
SMAC_Scaffolded_contig_158808	gi|224381666|ref|NC_011462.1|NC_011462_TGU1	73.59	1829	353	43	1	1750	6055298	6057075	0	1045	1	S
SMAC_Scaffolded_contig_39421	gi|224381666|ref|NC_011462.1|NC_011462_TGU1	74.01	3652	680	79	6977	10510	6058493	6054993	0	2194	12	M
SMAC_Scaffolded_contig_118998	gi|224381666|ref|NC_011462.1|NC_011462_TGU1	75.31	239	50	7	313	548	6063676	6063444	1e-31	141	1	S
SMAC_Scaffolded_contig_163138	gi|224381666|ref|NC_011462.1|NC_011462_TGU1	71.01	1442	250	35	1	1402	6070289	6068976	0	710	3	S
SMAC_Scaffolded_contig_63473	gi|224381666|ref|NC_011462.1|NC_011462_TGU1	74.25	3456	594	56	10806	14140	6073319	6076599	0	2235	253	M
SMAC_Scaffolded_contig_123376	gi|224381666|ref|NC_011462.1|NC_011462_TGU1	80.02	1221	193	26	1940	3144	6077796	6076611	0	1031	7	M
SMAC_Scaffolded_contig_123375	gi|224381666|ref|NC_011462.1|NC_011462_TGU1	73.49	1837	340	37	904	2649	6081962	6083742	0	1085	11	S
SMAC_Scaffolded_contig_111379	gi|224381666|ref|NC_011462.1|NC_011462_TGU1	72.12	3164	575	53	4689	7749	6089377	6086418	0	1768	8	S
SMAC_Scaffolded_contig_129066	gi|224381666|ref|NC_011462.1|NC_011462_TGU1	77.01	1766	304	40	3	1715	6102104	6103820	0	1267	2	S
SMAC_Scaffolded_contig_129067	gi|224381666|ref|NC_011462.1|NC_011462_TGU1	73.76	484	80	4	1	446	6104870	6104396	7e-87	325	1	S
SMAC_Scaffolded_contig_124296	gi|224381666|ref|NC_011462.1|NC_011462_TGU1	70	1170	217	29	77	1208	6108437	6109510	1e-144	518	1	S
SMAC_Scaffolded_contig_124297	gi|224381666|ref|NC_011462.1|NC_011462_TGU1	70.31	1866	365	44	31	1840	6110169	6108437	0	839	5	S
SMAC_Scaffolded_contig_19980	gi|224381666|ref|NC_011462.1|NC_011462_TGU1	72.63	2598	498	60	492	2975	6113550	6116048	0	1402	3147	M
SMAC_Scaffolded_contig_87816	gi|224381666|ref|NC_011462.1|NC_011462_TGU1	72.6	2135	385	48	3	2091	6116583	6118563	0	1177	5	M
SMAC_Scaffolded_contig_154509	gi|224381666|ref|NC_011462.1|NC_011462_TGU1	74.33	1636	307	28	527	2094	6120914	6119324	0	1032	6	M
SMAC_Scaffolded_contig_6098	gi|224381666|ref|NC_011462.1|NC_011462_TGU1	76.97	4060	723	68	17	3997	6122322	6126248	0	2991	5	M
SMAC_Scaffolded_contig_137843	gi|224381666|ref|NC_011462.1|NC_011462_TGU1	71.19	118	27	1	463	573	6127618	6127735	0	62	19	M
SMAC_Scaffolded_contig_21118	gi|224381666|ref|NC_011462.1|NC_011462_TGU1	74.56	3900	658	70	17636	21317	6133986	6130203	0	2547	809	M
SMAC_Scaffolded_contig_63883	gi|224381666|ref|NC_011462.1|NC_011462_TGU1	81.22	213	38	2	4463	4673	6143566	6143778	2e-47	197	186	M
SMAC_Scaffolded_contig_116084	gi|224381666|ref|NC_011462.1|NC_011462_TGU1	78.12	192	36	4	1	190	6143607	6143794	2e-32	145	27	M
SMAC_Scaffolded_contig_145778	gi|224381666|ref|NC_011462.1|NC_011462_TGU1	73.53	816	142	15	38	819	6164231	6163456	7e-140	502	2	S
SMAC_Scaffolded_contig_32397	gi|224381666|ref|NC_011462.1|NC_011462_TGU1	75.4	2943	516	41	16441	19242	6167550	6170425	0	2046	21	M
SMAC_Scaffolded_contig_52807	gi|224381666|ref|NC_011462.1|NC_011462_TGU1	75.62	5037	861	93	5670	10576	6176120	6171321	0	3460	7	M
SMAC_Scaffolded_contig_39175	gi|224381666|ref|NC_011462.1|NC_011462_TGU1	74.37	2384	453	35	139	2490	6185310	6187567	0	1530	4714	M
SMAC_Scaffolded_contig_131909	gi|224381666|ref|NC_011462.1|NC_011462_TGU1	80	75	15	0	455	529	6201420	6201494	2e-09	68	488	M
SMAC_Scaffolded_contig_1785	gi|224381666|ref|NC_011462.1|NC_011462_TGU1	96.43	28	1	0	758	785	6211238	6211265	0.011	46	261	M
SMAC_Scaffolded_contig_36671	gi|224381666|ref|NC_011462.1|NC_011462_TGU1	77.06	1574	274	30	6097	7610	6212861	6214407	0	1155	11434	M
SMAC_Scaffolded_contig_104989	gi|224381666|ref|NC_011462.1|NC_011462_TGU1	71.63	1149	225	25	478	1588	6217725	6216640	2e-163	581	7	M
SMAC_Scaffolded_contig_65667	gi|224381666|ref|NC_011462.1|NC_011462_TGU1	79.81	421	77	8	7581	7997	6219972	6219556	4e-92	347	5702	M
SMAC_Scaffolded_contig_174344	gi|224381666|ref|NC_011462.1|NC_011462_TGU1	72.14	402	61	5	138	489	6219973	6219573	1e-61	244	2227	M
SMAC_Scaffolded_contig_61808	gi|224381666|ref|NC_011462.1|NC_011462_TGU1	68.78	442	92	11	69	480	6219980	6220405	3e-39	167	1	S
SMAC_Scaffolded_contig_90960	gi|224381666|ref|NC_011462.1|NC_011462_TGU1	81.37	510	65	13	19	500	6222109	6221602	9e-128	461	1	S
SMAC_Scaffolded_contig_64193	gi|224381666|ref|NC_011462.1|NC_011462_TGU1	74.75	2166	374	50	4847	6895	6226267	6228376	0	1371	9782	M
SMAC_Scaffolded_contig_91352	gi|224381666|ref|NC_011462.1|NC_011462_TGU1	75	424	69	13	956	1369	6237421	6237817	1e-67	262	3	M
SMAC_Scaffolded_contig_95884	gi|224381666|ref|NC_011462.1|NC_011462_TGU1	78.63	2110	338	41	672	2753	6241580	6239556	0	1689	7619	M
SMAC_Scaffolded_contig_123647	gi|224381666|ref|NC_011462.1|NC_011462_TGU1	75.29	1619	324	31	419	2012	6242627	6244194	0	1045	2	S
SMAC_Scaffolded_contig_72324	gi|224381666|ref|NC_011462.1|NC_011462_TGU1	74.85	3197	551	58	86	3206	6246180	6249199	0	2107	2	S
SMAC_Scaffolded_contig_70154	gi|224381666|ref|NC_011462.1|NC_011462_TGU1	75.37	804	157	16	10993	11785	6249674	6250447	8e-145	522	1032	M
SMAC_Scaffolded_contig_1825	gi|224381666|ref|NC_011462.1|NC_011462_TGU1	72.93	4156	793	80	19664	23725	6255412	6259329	0	2361	29942	M
SMAC_Scaffolded_contig_9663	gi|224381666|ref|NC_011462.1|NC_011462_TGU1	76.37	2848	438	64	3114	5885	6274813	6277501	0	2026	11	S
SMAC_Scaffolded_contig_96596	gi|224381666|ref|NC_011462.1|NC_011462_TGU1	75.58	86	20	1	18	103	6277675	6277759	7e-06	57	66	M
SMAC_Scaffolded_contig_160660	gi|224381666|ref|NC_011462.1|NC_011462_TGU1	72.28	570	100	12	1	567	6281005	6281519	9e-84	315	1	S
SMAC_Scaffolded_contig_103400	gi|224381666|ref|NC_011462.1|NC_011462_TGU1	73.28	1044	185	21	274	1272	6285267	6284273	5e-174	616	1	S
SMAC_Scaffolded_contig_39928	gi|224381666|ref|NC_011462.1|NC_011462_TGU1	74.12	541	92	11	1085	1587	6288723	6288193	5e-90	338	2785	M
SMAC_Scaffolded_contig_93452	gi|224381666|ref|NC_011462.1|NC_011462_TGU1	73.03	545	90	15	3	537	6290098	6289601	2e-80	304	1	S
SMAC_Scaffolded_contig_62041	gi|224381666|ref|NC_011462.1|NC_011462_TGU1	75.09	1441	272	25	61	1445	6293363	6291954	0	946	6	S
SMAC_Scaffolded_contig_54308	gi|224381666|ref|NC_011462.1|NC_011462_TGU1	75.54	3271	541	66	24	3200	6301268	6298163	0	2228	7	S
SMAC_Scaffolded_contig_54309	gi|224381666|ref|NC_011462.1|NC_011462_TGU1	80.95	714	110	14	1	703	6301637	6302335	3e-180	636	1	S
SMAC_Scaffolded_contig_9175	gi|224381666|ref|NC_011462.1|NC_011462_TGU1	77.8	3342	529	57	3964	7226	6307595	6310802	0	2617	35	M
SMAC_Scaffolded_contig_139188	gi|224381666|ref|NC_011462.1|NC_011462_TGU1	78.45	427	68	11	1	418	6311560	6311149	3e-87	327	1	S
SMAC_Scaffolded_contig_76625	gi|224381666|ref|NC_011462.1|NC_011462_TGU1	79.87	1232	210	21	706	1918	6349773	6348561	0	1043	2	S
SMAC_Scaffolded_contig_65424	gi|224381666|ref|NC_011462.1|NC_011462_TGU1	73.06	5040	959	114	8427	13362	6354223	6358967	0	2812	9	M
SMAC_Scaffolded_contig_82056	gi|224381666|ref|NC_011462.1|NC_011462_TGU1	74.57	2446	476	44	1	2414	6356839	6354508	0	1541	2	S
SMAC_Scaffolded_contig_138251	gi|224381666|ref|NC_011462.1|NC_011462_TGU1	72.46	414	83	7	403	814	6359346	6358962	6e-58	230	88	M
SMAC_Scaffolded_contig_40818	gi|224381666|ref|NC_011462.1|NC_011462_TGU1	76.39	2804	471	49	9577	12327	6364761	6362096	0	2024	215	M
SMAC_Scaffolded_contig_107891	gi|224381666|ref|NC_011462.1|NC_011462_TGU1	70.76	1019	150	32	11	965	6373584	6374518	1e-134	484	1	S
SMAC_Scaffolded_contig_163332	gi|224381666|ref|NC_011462.1|NC_011462_TGU1	71.11	1111	227	27	10	1081	6377103	6376048	2e-145	520	1	S
SMAC_Scaffolded_contig_15168	gi|224381666|ref|NC_011462.1|NC_011462_TGU1	72.28	2294	420	62	29	2194	6382287	6380082	0	1186	2	M
SMAC_Scaffolded_contig_165464	gi|224381666|ref|NC_011462.1|NC_011462_TGU1	79.24	525	89	10	1	516	6383644	6384157	5e-118	428	2	M
SMAC_Scaffolded_contig_116266	gi|224381666|ref|NC_011462.1|NC_011462_TGU1	70.45	1188	209	26	783	1859	6385243	6384087	3e-160	571	3	M
SMAC_Scaffolded_contig_62076	gi|224381666|ref|NC_011462.1|NC_011462_TGU1	74.51	820	155	14	41	853	6390604	6391376	4e-147	526	1	S
SMAC_Scaffolded_contig_14306	gi|224381666|ref|NC_011462.1|NC_011462_TGU1	70.71	3080	588	79	3437	6391	6400584	6397694	0	1415	8628	M
SMAC_Scaffolded_contig_85592	gi|224381666|ref|NC_011462.1|NC_011462_TGU1	72.93	458	94	11	5	435	6402632	6403086	1e-62	244	1	S
SMAC_Scaffolded_contig_145687	gi|224381666|ref|NC_011462.1|NC_011462_TGU1	71.84	3502	700	74	262	3625	6403529	6406882	0	1795	4	M
SMAC_Scaffolded_contig_121517	gi|224381666|ref|NC_011462.1|NC_011462_TGU1	77.52	903	167	14	1444	2322	6413980	6413090	0	682	12	M
SMAC_Scaffolded_contig_163957	gi|224381666|ref|NC_011462.1|NC_011462_TGU1	68.84	597	127	12	2	562	6415922	6415349	2e-60	237	1	S
SMAC_Scaffolded_contig_51579	gi|224381666|ref|NC_011462.1|NC_011462_TGU1	70.88	2284	416	61	1282	3482	6416377	6418494	0	1070	4	M
SMAC_Scaffolded_contig_147173	gi|224381666|ref|NC_011462.1|NC_011462_TGU1	75.49	563	113	7	12	563	6419053	6418505	6e-105	385	1	S
SMAC_Scaffolded_contig_145047	gi|224381666|ref|NC_011462.1|NC_011462_TGU1	71.24	1926	343	48	310	2075	6423462	6421588	0	949	7	S
SMAC_Scaffolded_contig_68618	gi|224381666|ref|NC_011462.1|NC_011462_TGU1	79.02	143	29	1	560	701	6425906	6426048	6e-25	120	25	M
SMAC_Scaffolded_contig_49743	gi|224381666|ref|NC_011462.1|NC_011462_TGU1	80.3	132	25	1	101	231	6425917	6426048	6e-24	118	4	M
SMAC_Scaffolded_contig_58962	gi|224381666|ref|NC_011462.1|NC_011462_TGU1	80.7	57	9	2	244	299	6428325	6428270	0.012	46	95	M
SMAC_Scaffolded_contig_50253	gi|224381666|ref|NC_011462.1|NC_011462_TGU1	71.71	5352	983	146	27762	32907	6447071	6442045	0	2646	7337	M
SMAC_Scaffolded_contig_179394	gi|224381666|ref|NC_011462.1|NC_011462_TGU1	77.87	506	65	15	34	525	6452242	6452714	2e-104	383	2	M
SMAC_Scaffolded_contig_141049	gi|224381666|ref|NC_011462.1|NC_011462_TGU1	75.64	583	117	8	33	611	6466334	6466895	1e-108	398	2	M
SMAC_Scaffolded_contig_97448	gi|224381666|ref|NC_011462.1|NC_011462_TGU1	76.59	2708	427	51	9929	12582	6475863	6473309	0	1983	1473	M
SMAC_Scaffolded_contig_165979	gi|224381666|ref|NC_011462.1|NC_011462_TGU1	100	24	0	0	561	584	6483203	6483226	0.025	44	43	M
SMAC_Scaffolded_contig_2443	gi|224381666|ref|NC_011462.1|NC_011462_TGU1	73.5	6614	1128	152	12826	19170	6500983	6494726	0	3903	6756	M
SMAC_Scaffolded_contig_40320	gi|224381666|ref|NC_011462.1|NC_011462_TGU1	76.55	3689	608	76	10915	14495	6521789	6525328	0	2643	4114	M
SMAC_Scaffolded_contig_164879	gi|224381666|ref|NC_011462.1|NC_011462_TGU1	72.82	563	116	11	24	571	6530401	6530941	1e-81	309	5	M
SMAC_Scaffolded_contig_38420	gi|224381666|ref|NC_011462.1|NC_011462_TGU1	89.57	211	17	2	327	536	6533022	6533228	2e-72	277	2	S
SMAC_Scaffolded_contig_81430	gi|224381666|ref|NC_011462.1|NC_011462_TGU1	75.79	1933	339	44	1083	2955	6544158	6542295	0	1294	4	M
SMAC_Scaffolded_contig_3824	gi|224381666|ref|NC_011462.1|NC_011462_TGU1	72.4	2065	347	46	85	1994	6553340	6551344	0	1148	5	M
SMAC_Scaffolded_contig_11503	gi|224381666|ref|NC_011462.1|NC_011462_TGU1	77.4	969	150	18	1338	2297	6574398	6573490	0	742	7	M
SMAC_Scaffolded_contig_10623	gi|224381666|ref|NC_011462.1|NC_011462_TGU1	75.52	5432	907	110	4681	9971	6583673	6578524	0	3685	9	M
SMAC_Scaffolded_contig_79894	gi|224381666|ref|NC_011462.1|NC_011462_TGU1	71.41	808	183	20	1845	2628	6587744	6588527	2e-99	369	3	S
SMAC_Scaffolded_contig_151930	gi|224381666|ref|NC_011462.1|NC_011462_TGU1	74.87	581	100	13	15	561	6589464	6590032	4e-101	372	2	M
SMAC_Scaffolded_contig_79314	gi|224381666|ref|NC_011462.1|NC_011462_TGU1	73.56	1112	186	19	45	1120	6591352	6590313	0	691	4	M
SMAC_Scaffolded_contig_41090	gi|224381666|ref|NC_011462.1|NC_011462_TGU1	75.7	3444	555	73	3875	7183	6597976	6594680	0	2363	46	M
SMAC_Scaffolded_contig_30611	gi|224381666|ref|NC_011462.1|NC_011462_TGU1	78.51	563	88	7	715	1257	6599110	6599659	2e-129	468	6	M
SMAC_Scaffolded_contig_21375	gi|224381666|ref|NC_011462.1|NC_011462_TGU1	70.67	6133	1152	172	370	6322	6602616	6608281	0	2758	2	M
SMAC_Scaffolded_contig_30610	gi|224381666|ref|NC_011462.1|NC_011462_TGU1	71.42	2974	543	76	370	3253	6602616	6605372	0	1465	2	M
SMAC_Scaffolded_contig_73998	gi|224381666|ref|NC_011462.1|NC_011462_TGU1	91.71	2882	156	26	6257	9134	6612818	6610016	0	4078	5	M
SMAC_Scaffolded_contig_136728	gi|224381666|ref|NC_011462.1|NC_011462_TGU1	73.3	2206	398	53	319	2455	6612855	6614938	0	1256	1	S
SMAC_Scaffolded_contig_149687	gi|224381666|ref|NC_011462.1|NC_011462_TGU1	75.89	365	71	7	210	572	6624235	6623886	5e-63	246	1	S
SMAC_Scaffolded_contig_91685	gi|224381666|ref|NC_011462.1|NC_011462_TGU1	73.19	746	131	13	9358	10044	6627685	6628420	1e-122	448	10	S
SMAC_Scaffolded_contig_108223	gi|224381666|ref|NC_011462.1|NC_011462_TGU1	75.67	744	121	16	572	1297	6633859	6633158	3e-141	508	2	S
SMAC_Scaffolded_contig_108222	gi|224381666|ref|NC_011462.1|NC_011462_TGU1	75.89	531	82	6	211	738	6634973	6635460	4e-108	396	1	S
SMAC_Scaffolded_contig_4703	gi|224381666|ref|NC_011462.1|NC_011462_TGU1	76	6371	1059	117	28662	34865	6642285	6636218	0	4493	1361	M
SMAC_Scaffolded_contig_56114	gi|224381666|ref|NC_011462.1|NC_011462_TGU1	80.55	694	94	15	1743	2425	6663884	6664547	1e-172	612	6	M
SMAC_Scaffolded_contig_174763	gi|224381666|ref|NC_011462.1|NC_011462_TGU1	91.15	226	19	1	1	226	6672168	6671944	1e-83	315	2	S
SMAC_Scaffolded_contig_146740	gi|224381666|ref|NC_011462.1|NC_011462_TGU1	79.37	1958	317	32	1	1932	6672249	6674145	0	1644	5	M
SMAC_Scaffolded_contig_93719	gi|224381666|ref|NC_011462.1|NC_011462_TGU1	75.95	3563	588	73	12253	15685	6680536	6677113	0	2475	15711	M
SMAC_Scaffolded_contig_132077	gi|224381666|ref|NC_011462.1|NC_011462_TGU1	70.81	764	152	18	6	740	6694899	6695620	4e-96	356	1	S
SMAC_Scaffolded_contig_102233	gi|224381666|ref|NC_011462.1|NC_011462_TGU1	72.47	1097	241	16	3	1074	6696935	6695875	5e-169	600	2	S
SMAC_Scaffolded_contig_102232	gi|224381666|ref|NC_011462.1|NC_011462_TGU1	76.69	326	57	11	141	458	6697430	6697744	7e-53	214	549	M
SMAC_Scaffolded_contig_187518	gi|224381666|ref|NC_011462.1|NC_011462_TGU1	74.09	328	77	5	2	322	6698683	6698357	9e-47	194	1	S
SMAC_Scaffolded_contig_142616	gi|224381666|ref|NC_011462.1|NC_011462_TGU1	73.28	539	96	16	620	1148	6699195	6698695	5e-78	297	1	S
SMAC_Scaffolded_contig_43458	gi|224381666|ref|NC_011462.1|NC_011462_TGU1	79.57	1429	170	28	5703	7047	6705691	6707081	0	1245	23	S
SMAC_Scaffolded_contig_179434	gi|224381666|ref|NC_011462.1|NC_011462_TGU1	72.55	521	101	12	139	649	6712813	6712325	9e-73	279	1	S
SMAC_Scaffolded_contig_66260	gi|224381666|ref|NC_011462.1|NC_011462_TGU1	74.59	181	36	1	1	171	6723991	6723811	3e-25	123	2	S
SMAC_Scaffolded_contig_135082	gi|224381666|ref|NC_011462.1|NC_011462_TGU1	69.2	815	140	28	289	1034	6726867	6727639	6e-83	313	4	S
SMAC_Scaffolded_contig_155902	gi|224381666|ref|NC_011462.1|NC_011462_TGU1	73.08	546	109	12	4	517	6731837	6732376	5e-80	302	1	S
SMAC_Scaffolded_contig_76166	gi|224381666|ref|NC_011462.1|NC_011462_TGU1	76.21	2593	466	47	6219	8736	6738551	6736035	0	1819	2351	M
SMAC_Scaffolded_contig_48608	gi|224381666|ref|NC_011462.1|NC_011462_TGU1	79.21	1501	212	23	2145	3626	6745047	6743628	0	1287	1324	M
SMAC_Scaffolded_contig_150649	gi|224381666|ref|NC_011462.1|NC_011462_TGU1	74.6	1437	256	28	80	1471	6749251	6750623	0	919	2	M
SMAC_Scaffolded_contig_155294	gi|224381666|ref|NC_011462.1|NC_011462_TGU1	69.45	599	109	14	8	557	6756063	6756636	6e-67	259	1	S
SMAC_Scaffolded_contig_155293	gi|224381666|ref|NC_011462.1|NC_011462_TGU1	76.14	792	130	19	15	788	6760353	6759603	1e-151	544	2	S
SMAC_Scaffolded_contig_8268	gi|224381666|ref|NC_011462.1|NC_011462_TGU1	72.56	1560	283	41	25499	27008	6772289	6773753	0	830	6395	M
SMAC_Scaffolded_contig_48639	gi|224381666|ref|NC_011462.1|NC_011462_TGU1	74	2596	486	55	1	2524	6778487	6776009	0	1561	3	S
SMAC_Scaffolded_contig_68288	gi|224381666|ref|NC_011462.1|NC_011462_TGU1	72.81	1802	339	40	442	2175	6781244	6782962	0	996	9461	M
SMAC_Scaffolded_contig_22488	gi|224381666|ref|NC_011462.1|NC_011462_TGU1	75.19	1072	184	15	607	1611	6784701	6783645	0	740	5	M
SMAC_Scaffolded_contig_46963	gi|224381666|ref|NC_011462.1|NC_011462_TGU1	73.66	5330	954	108	36	5215	6785296	6790325	0	3202	1965	M
SMAC_Scaffolded_contig_21007	gi|224381666|ref|NC_011462.1|NC_011462_TGU1	69.25	774	181	26	1	742	6787344	6788092	4e-66	257	1134	M
SMAC_Scaffolded_contig_163578	gi|224381666|ref|NC_011462.1|NC_011462_TGU1	71.2	816	169	27	1	762	6787460	6788263	3e-94	351	510	M
SMAC_Scaffolded_contig_143358	gi|224381666|ref|NC_011462.1|NC_011462_TGU1	77.84	194	32	7	128	313	6787959	6788149	3e-29	134	26	M
SMAC_Scaffolded_contig_148158	gi|224381666|ref|NC_011462.1|NC_011462_TGU1	79.37	732	123	15	204	927	6799134	6798423	9e-169	598	1	S
SMAC_Scaffolded_contig_40996	gi|224381666|ref|NC_011462.1|NC_011462_TGU1	80.74	618	98	7	1155	1760	6803047	6803655	1e-158	565	3	M
SMAC_Scaffolded_contig_40997	gi|224381666|ref|NC_011462.1|NC_011462_TGU1	76.28	4115	720	69	6	4011	6807014	6803047	0	2940	12	M
SMAC_Scaffolded_contig_96745	gi|224381666|ref|NC_011462.1|NC_011462_TGU1	73.73	3529	642	68	5849	9257	6810291	6806928	0	2136	4672	M
SMAC_Scaffolded_contig_143884	gi|224381666|ref|NC_011462.1|NC_011462_TGU1	79.09	727	125	12	30	742	6815344	6814631	3e-168	596	1	S
SMAC_Scaffolded_contig_44497	gi|224381666|ref|NC_011462.1|NC_011462_TGU1	76.17	3475	569	58	1958	5301	6821858	6818512	0	2506	6	M
SMAC_Scaffolded_contig_93425	gi|224381666|ref|NC_011462.1|NC_011462_TGU1	77.36	530	98	10	293	819	6833410	6833920	4e-106	390	1121	M
SMAC_Scaffolded_contig_97437	gi|224381666|ref|NC_011462.1|NC_011462_TGU1	78.43	1970	275	40	1	1877	6849496	6851408	0	1591	1	S
SMAC_Scaffolded_contig_38816	gi|224381666|ref|NC_011462.1|NC_011462_TGU1	79.96	5588	788	85	48217	53597	6860697	6866159	0	4946	683	M
SMAC_Scaffolded_contig_140136	gi|224381666|ref|NC_011462.1|NC_011462_TGU1	78.03	487	99	5	1672	2151	6871826	6872311	6e-103	381	583	M
SMAC_Scaffolded_contig_131577	gi|224381666|ref|NC_011462.1|NC_011462_TGU1	74.12	340	76	3	502	829	6871920	6872259	3e-53	214	196	M
SMAC_Scaffolded_contig_90742	gi|224381666|ref|NC_011462.1|NC_011462_TGU1	78.95	304	60	2	5	305	6871943	6872245	2e-65	255	489	M
SMAC_Scaffolded_contig_40083	gi|224381666|ref|NC_011462.1|NC_011462_TGU1	80.25	395	61	6	544	922	6871962	6871569	9e-93	349	1802	M
SMAC_Scaffolded_contig_110844	gi|224381666|ref|NC_011462.1|NC_011462_TGU1	81.56	244	44	1	974	1217	6872054	6872296	9e-59	233	285	M
SMAC_Scaffolded_contig_141805	gi|224381666|ref|NC_011462.1|NC_011462_TGU1	78.45	181	37	1	5032	5210	6872054	6872234	8e-33	149	17	M
SMAC_Scaffolded_contig_72866	gi|224381666|ref|NC_011462.1|NC_011462_TGU1	68.9	508	123	5	2022	2495	6872114	6871608	1e-52	214	496	M
SMAC_Scaffolded_contig_60070	gi|224381666|ref|NC_011462.1|NC_011462_TGU1	72.78	327	71	6	142	452	6872201	6871877	2e-42	178	108	M
SMAC_Scaffolded_contig_139832	gi|224381666|ref|NC_011462.1|NC_011462_TGU1	93.55	31	2	0	1310	1340	6887237	6887207	0.007	48	39	M
SMAC_Scaffolded_contig_29001	gi|224381666|ref|NC_011462.1|NC_011462_TGU1	75.84	2603	453	41	153	2669	6901361	6898849	0	1833	3	M
SMAC_Scaffolded_contig_18866	gi|224381666|ref|NC_011462.1|NC_011462_TGU1	76.64	5497	962	81	24101	29433	6924649	6929987	0	4049	1837	M
SMAC_Scaffolded_contig_40764	gi|224381666|ref|NC_011462.1|NC_011462_TGU1	87.5	40	5	0	1187	1226	6929890	6929929	0.002	50	54	M
SMAC_Scaffolded_contig_130061	gi|224381666|ref|NC_011462.1|NC_011462_TGU1	78.95	57	10	1	560	614	6932416	6932360	0.011	46	52	M
SMAC_Scaffolded_contig_149708	gi|224381666|ref|NC_011462.1|NC_011462_TGU1	71.04	297	44	5	207	472	6934021	6933736	3e-38	163	1	S
SMAC_Scaffolded_contig_175955	gi|224381666|ref|NC_011462.1|NC_011462_TGU1	85.81	620	74	5	1	610	6953698	6954313	0	711	1	S
SMAC_Scaffolded_contig_46987	gi|224381666|ref|NC_011462.1|NC_011462_TGU1	77.26	1596	256	31	2	1565	6953720	6952200	0	1198	18038	M
SMAC_Scaffolded_contig_105447	gi|224381666|ref|NC_011462.1|NC_011462_TGU1	78.66	3398	538	49	5625	8946	6966587	6963301	0	2807	443	M
SMAC_Scaffolded_contig_23831	gi|224381666|ref|NC_011462.1|NC_011462_TGU1	76.12	6055	1082	91	2214	8144	6972846	6978660	0	4318	9	M
SMAC_Scaffolded_contig_106658	gi|224381666|ref|NC_011462.1|NC_011462_TGU1	88.24	34	4	0	687	720	6978631	6978664	0	44	98	M
SMAC_Scaffolded_contig_2857	gi|224381666|ref|NC_011462.1|NC_011462_TGU1	78.22	6101	987	77	523	6488	6989105	6994998	0	4973	21	M
SMAC_Scaffolded_contig_111665	gi|224381666|ref|NC_011462.1|NC_011462_TGU1	77.65	2555	433	44	68	2567	7000463	7002934	0	1959	1	S
SMAC_Scaffolded_contig_79910	gi|224381666|ref|NC_011462.1|NC_011462_TGU1	86.75	151	18	2	268	416	7014237	7014087	7e-42	176	2	S
SMAC_Scaffolded_contig_141668	gi|224381666|ref|NC_011462.1|NC_011462_TGU1	73.93	560	81	13	245	789	7019318	7018809	7e-95	352	1	S
SMAC_Scaffolded_contig_100885	gi|224381666|ref|NC_011462.1|NC_011462_TGU1	66.25	554	126	11	64	569	7020133	7019593	2e-37	161	1	S
SMAC_Scaffolded_contig_64275	gi|224381666|ref|NC_011462.1|NC_011462_TGU1	82.21	1068	133	16	29	1086	7021217	7020197	0	1049	1	S
SMAC_Scaffolded_contig_64276	gi|224381666|ref|NC_011462.1|NC_011462_TGU1	77.47	799	93	15	122	892	7021636	7022375	0	641	1	S
SMAC_Scaffolded_contig_122223	gi|224381666|ref|NC_011462.1|NC_011462_TGU1	79.13	762	93	13	26	772	7026187	7025477	0	659	1	S
SMAC_Scaffolded_contig_109507	gi|224381666|ref|NC_011462.1|NC_011462_TGU1	83.15	445	56	9	49	481	7032327	7032764	1e-121	441	3	S
SMAC_Scaffolded_contig_29784	gi|224381666|ref|NC_011462.1|NC_011462_TGU1	78.67	2339	328	39	8759	10989	7034557	7036832	0	1947	8437	M
SMAC_Scaffolded_contig_54732	gi|224381666|ref|NC_011462.1|NC_011462_TGU1	81.39	489	52	8	57	525	7036850	7037319	5e-131	471	1	S
SMAC_Scaffolded_contig_62854	gi|224381666|ref|NC_011462.1|NC_011462_TGU1	78.4	940	102	12	17	911	7038839	7039722	0	818	3	S
SMAC_Scaffolded_contig_99463	gi|224381666|ref|NC_011462.1|NC_011462_TGU1	73.8	1870	313	34	3179	5014	7043854	7045580	0	1171	5	S
SMAC_Scaffolded_contig_171559	gi|224381666|ref|NC_011462.1|NC_011462_TGU1	96.3	27	1	0	95	121	7044172	7044146	0.09	44	5	M
SMAC_Scaffolded_contig_23642	gi|224381666|ref|NC_011462.1|NC_011462_TGU1	79.69	3939	568	53	1264	5099	7056099	7052290	0	3467	3	S
SMAC_Scaffolded_contig_7458	gi|224381666|ref|NC_011462.1|NC_011462_TGU1	76.6	282	64	2	1	281	7056624	7056904	1e-49	205	2	S
SMAC_Scaffolded_contig_7457	gi|224381666|ref|NC_011462.1|NC_011462_TGU1	80.48	1388	164	23	1789	3110	7059452	7058106	0	1274	6	M
SMAC_Scaffolded_contig_36475	gi|224381666|ref|NC_011462.1|NC_011462_TGU1	81.53	11266	1598	146	7626	18636	7078631	7067594	0	10710	3071	M
SMAC_Scaffolded_contig_62655	gi|224381666|ref|NC_011462.1|NC_011462_TGU1	88.27	784	76	7	749	1525	7081657	7082431	0	982	2	S
SMAC_Scaffolded_contig_77498	gi|224381666|ref|NC_011462.1|NC_011462_TGU1	76.18	1990	344	37	6	1952	7089399	7091301	0	1402	2	M
SMAC_Scaffolded_contig_2008	gi|224381666|ref|NC_011462.1|NC_011462_TGU1	79.39	9126	1291	151	11900	20846	7098207	7106921	0	7829	4833	M
SMAC_Scaffolded_contig_137537	gi|224381666|ref|NC_011462.1|NC_011462_TGU1	78.65	1635	257	34	749	2338	7120872	7122459	0	1305	2	S
SMAC_Scaffolded_contig_27655	gi|224381666|ref|NC_011462.1|NC_011462_TGU1	75.51	98	17	4	348	440	7122877	7122782	2e-05	57	24	M
SMAC_Scaffolded_contig_22952	gi|224381666|ref|NC_011462.1|NC_011462_TGU1	81.37	8719	1291	110	39892	48471	7143759	7135235	0	8206	2263	M
SMAC_Scaffolded_contig_14344	gi|224381666|ref|NC_011462.1|NC_011462_TGU1	80.15	2484	334	38	1	2391	7147062	7144645	0	2230	1	S
SMAC_Scaffolded_contig_42221	gi|224381666|ref|NC_011462.1|NC_011462_TGU1	71.96	2500	442	45	288	2654	7151631	7154004	0	1379	3	S
SMAC_Scaffolded_contig_103718	gi|224381666|ref|NC_011462.1|NC_011462_TGU1	79.59	2425	398	32	10	2411	7169204	7166854	0	2085	2	M
SMAC_Scaffolded_contig_35150	gi|224381666|ref|NC_011462.1|NC_011462_TGU1	77.7	5081	819	79	7453	12460	7189584	7194423	0	3983	9	M
SMAC_Scaffolded_contig_10224	gi|224381666|ref|NC_011462.1|NC_011462_TGU1	67.55	413	71	11	6	398	7197513	7197882	9e-34	149	1	S
SMAC_Scaffolded_contig_10223	gi|224381666|ref|NC_011462.1|NC_011462_TGU1	75.15	1453	244	23	8	1394	7197518	7196117	0	994	4	M
SMAC_Scaffolded_contig_77840	gi|224381666|ref|NC_011462.1|NC_011462_TGU1	74.15	2054	424	40	1	2012	7225355	7223367	0	1227	3	M
SMAC_Scaffolded_contig_177333	gi|224381666|ref|NC_011462.1|NC_011462_TGU1	83.43	175	20	1	207	372	7266747	7266573	6e-46	188	1	S
SMAC_Scaffolded_contig_16434	gi|224381666|ref|NC_011462.1|NC_011462_TGU1	75.79	1797	316	37	3	1765	7266962	7265251	0	1220	1	S
SMAC_Scaffolded_contig_1622	gi|224381666|ref|NC_011462.1|NC_011462_TGU1	76.46	8186	1434	129	36525	44526	7272195	7264319	0	5937	13335	M
SMAC_Scaffolded_contig_117345	gi|224381666|ref|NC_011462.1|NC_011462_TGU1	77.2	1570	300	21	220	1751	7306569	7305020	0	1175	3	M
SMAC_Scaffolded_contig_12293	gi|224381666|ref|NC_011462.1|NC_011462_TGU1	77.2	2539	403	38	369	2835	7320361	7317927	0	1956	5	S
SMAC_Scaffolded_contig_88807	gi|224381666|ref|NC_011462.1|NC_011462_TGU1	74.19	1054	182	25	218	1219	7327080	7326065	0	643	2	M
SMAC_Scaffolded_contig_46752	gi|224381666|ref|NC_011462.1|NC_011462_TGU1	77.69	6265	1006	108	6115	12182	7337232	7331163	0	4863	14	M
SMAC_Scaffolded_contig_45941	gi|224381666|ref|NC_011462.1|NC_011462_TGU1	78.62	7164	1092	120	14105	21066	7345929	7339004	0	5869	584	M
SMAC_Scaffolded_contig_126665	gi|224381666|ref|NC_011462.1|NC_011462_TGU1	75.67	896	172	12	1	880	7349271	7348406	9e-176	621	1	S
SMAC_Scaffolded_contig_45942	gi|224381666|ref|NC_011462.1|NC_011462_TGU1	83.04	1238	163	11	834	2051	7349494	7350704	0	1279	3	S
SMAC_Scaffolded_contig_101383	gi|224381666|ref|NC_011462.1|NC_011462_TGU1	76.19	504	88	9	17	509	7357436	7356954	3e-96	356	1	S
SMAC_Scaffolded_contig_68546	gi|224381666|ref|NC_011462.1|NC_011462_TGU1	74.23	749	126	7	1	732	7359813	7360511	3e-142	509	1	S
SMAC_Scaffolded_contig_97767	gi|224381666|ref|NC_011462.1|NC_011462_TGU1	78.45	970	150	14	1154	2103	7361671	7360741	0	798	4	M
SMAC_Scaffolded_contig_5901	gi|224381666|ref|NC_011462.1|NC_011462_TGU1	74.04	4449	797	95	8271	12567	7371128	7375370	0	2711	1822	M
SMAC_Scaffolded_contig_161700	gi|224381666|ref|NC_011462.1|NC_011462_TGU1	96.43	28	1	0	176	203	7373639	7373666	0.014	46	83	M
SMAC_Scaffolded_contig_90399	gi|224381666|ref|NC_011462.1|NC_011462_TGU1	78.34	3828	590	55	1	3769	7383935	7380288	0	3133	3	M
SMAC_Scaffolded_contig_177306	gi|224381666|ref|NC_011462.1|NC_011462_TGU1	77.6	250	48	5	2	250	7386291	7386049	3e-44	183	4	M
SMAC_Scaffolded_contig_98662	gi|224381666|ref|NC_011462.1|NC_011462_TGU1	69.18	1155	199	34	586	1676	7398203	7397142	1e-128	466	1211	M
SMAC_Scaffolded_contig_24579	gi|224381666|ref|NC_011462.1|NC_011462_TGU1	83.72	43	5	1	247	287	7400175	7400133	0.03	44	38	M
SMAC_Scaffolded_contig_105031	gi|224381666|ref|NC_011462.1|NC_011462_TGU1	74.14	1520	260	32	18	1452	7410000	7408529	0	946	3	M
SMAC_Scaffolded_contig_2553	gi|224381666|ref|NC_011462.1|NC_011462_TGU1	74.06	5898	1012	124	16747	22435	7410004	7415592	0	3647	4147	M
SMAC_Scaffolded_contig_108629	gi|224381666|ref|NC_011462.1|NC_011462_TGU1	76.09	1033	164	22	34	1030	7414607	7415592	0	726	2	S
SMAC_Scaffolded_contig_79345	gi|224381666|ref|NC_011462.1|NC_011462_TGU1	75.54	466	108	3	2962	3423	7452894	7452431	7e-84	318	3817	M
SMAC_Scaffolded_contig_6603	gi|224381666|ref|NC_011462.1|NC_011462_TGU1	75.92	4846	862	96	7470	12200	7481249	7485904	0	3321	1695	M
SMAC_Scaffolded_contig_15628	gi|224381666|ref|NC_011462.1|NC_011462_TGU1	71.19	413	100	10	19114	19513	7490668	7490262	6e-42	181	352	M
SMAC_Scaffolded_contig_3823	gi|224381666|ref|NC_011462.1|NC_011462_TGU1	77.96	4333	715	68	49803	54062	7515463	7519628	0	3418	19462	M
SMAC_Scaffolded_contig_67270	gi|224381666|ref|NC_011462.1|NC_011462_TGU1	80.18	666	94	11	50	689	7553185	7553838	4e-166	590	4	S
SMAC_Scaffolded_contig_149964	gi|224381666|ref|NC_011462.1|NC_011462_TGU1	72.26	328	73	7	2	321	7563875	7563558	3e-39	167	1	S
SMAC_Scaffolded_contig_149965	gi|224381666|ref|NC_011462.1|NC_011462_TGU1	75.93	1130	205	22	847	1939	7564078	7565177	0	773	2	S
SMAC_Scaffolded_contig_180874	gi|224381666|ref|NC_011462.1|NC_011462_TGU1	75.8	628	106	9	4	618	7569165	7569759	7e-124	448	1	S
SMAC_Scaffolded_contig_148989	gi|224381666|ref|NC_011462.1|NC_011462_TGU1	82.04	1286	192	15	24	1296	7571678	7570419	0	1245	2	S
SMAC_Scaffolded_contig_109268	gi|224381666|ref|NC_011462.1|NC_011462_TGU1	73.63	273	46	7	19	280	7599310	7599567	5e-37	159	2	S
SMAC_Scaffolded_contig_4556	gi|224381666|ref|NC_011462.1|NC_011462_TGU1	77.8	3334	570	62	5147	8438	7614431	7611226	0	2551	20254	M
SMAC_Scaffolded_contig_37331	gi|224381666|ref|NC_011462.1|NC_011462_TGU1	76.8	2871	485	44	4264	7025	7626552	7623754	0	2140	7	S
SMAC_Scaffolded_contig_37332	gi|224381666|ref|NC_011462.1|NC_011462_TGU1	75.76	1324	222	15	462	1758	7627451	7628702	0	962	2	S
SMAC_Scaffolded_contig_86423	gi|224381666|ref|NC_011462.1|NC_011462_TGU1	75.72	3274	623	53	1723	4925	7637037	7633865	0	2237	108	M
SMAC_Scaffolded_contig_27592	gi|224381666|ref|NC_011462.1|NC_011462_TGU1	74	4404	815	91	14982	19229	7653657	7657886	0	2668	16450	M
SMAC_Scaffolded_contig_3985	gi|224381666|ref|NC_011462.1|NC_011462_TGU1	73.85	3040	487	61	2955	5912	7662075	7659262	0	1902	4	S
SMAC_Scaffolded_contig_8648	gi|224381666|ref|NC_011462.1|NC_011462_TGU1	75.95	9126	1619	136	2325	11272	7666206	7674933	0	6468	4701	M
SMAC_Scaffolded_contig_126248	gi|224381666|ref|NC_011462.1|NC_011462_TGU1	73.45	1819	343	20	6	1781	7667091	7668812	0	1139	2	M
SMAC_Scaffolded_contig_40205	gi|224381666|ref|NC_011462.1|NC_011462_TGU1	76.26	2199	354	35	8	2092	7675981	7678125	0	1606	1	S
SMAC_Scaffolded_contig_115183	gi|224381666|ref|NC_011462.1|NC_011462_TGU1	76.75	3634	678	50	13	3575	7694323	7697860	0	2670	2	M
SMAC_Scaffolded_contig_111423	gi|224381666|ref|NC_011462.1|NC_011462_TGU1	72.22	871	178	15	5	853	7699821	7698993	4e-130	470	1	S
SMAC_Scaffolded_contig_90862	gi|224381666|ref|NC_011462.1|NC_011462_TGU1	75.51	4695	886	86	28	4611	7706838	7702297	0	3133	2	S
SMAC_Scaffolded_contig_13076	gi|224381666|ref|NC_011462.1|NC_011462_TGU1	76.46	2842	481	48	66	2852	7707366	7710074	0	2062	11	M
SMAC_Scaffolded_contig_94306	gi|224381666|ref|NC_011462.1|NC_011462_TGU1	72.56	2573	511	48	7	2530	7716244	7718670	0	1449	2	M
SMAC_Scaffolded_contig_66125	gi|224381666|ref|NC_011462.1|NC_011462_TGU1	76.53	1180	183	28	29	1188	7727221	7726116	0	838	4	M
SMAC_Scaffolded_contig_168323	gi|224381666|ref|NC_011462.1|NC_011462_TGU1	79.17	72	10	2	995	1061	7729641	7729570	4e-06	59	177	M
SMAC_Scaffolded_contig_98761	gi|224381666|ref|NC_011462.1|NC_011462_TGU1	70.34	2242	434	48	1453	3537	7736796	7734629	0	1038	215	M
SMAC_Scaffolded_contig_55879	gi|224381666|ref|NC_011462.1|NC_011462_TGU1	76.39	1220	220	25	1767	2954	7745572	7744389	0	850	9	M
SMAC_Scaffolded_contig_164052	gi|224381666|ref|NC_011462.1|NC_011462_TGU1	71.57	1245	225	31	654	1816	7748420	7747223	5e-177	627	3	S
SMAC_Scaffolded_contig_157874	gi|224381666|ref|NC_011462.1|NC_011462_TGU1	73.31	1064	155	22	28	1016	7751520	7750511	0	655	2	S
SMAC_Scaffolded_contig_94170	gi|224381666|ref|NC_011462.1|NC_011462_TGU1	74.99	3523	637	63	3646	7046	7755603	7752203	0	2318	11731	M
SMAC_Scaffolded_contig_158985	gi|224381666|ref|NC_011462.1|NC_011462_TGU1	74.96	1126	188	22	6	1087	7760252	7759177	0	746	1	S
SMAC_Scaffolded_contig_87796	gi|224381666|ref|NC_011462.1|NC_011462_TGU1	71.7	3163	569	73	72	3075	7764574	7761579	0	1635	3	M
SMAC_Scaffolded_contig_118824	gi|224381666|ref|NC_011462.1|NC_011462_TGU1	83.33	144	21	2	76	217	7766908	7767050	9e-32	145	187	M
SMAC_Scaffolded_contig_134370	gi|224381666|ref|NC_011462.1|NC_011462_TGU1	86.41	103	14	0	1995	2097	7767042	7766940	1e-25	123	8	M
SMAC_Scaffolded_contig_87797	gi|224381666|ref|NC_011462.1|NC_011462_TGU1	73.3	3801	698	73	3004	6629	7768638	7772296	0	2235	132	M
SMAC_Scaffolded_contig_188623	gi|224381666|ref|NC_011462.1|NC_011462_TGU1	71.05	601	109	22	166	718	7774726	7775309	8e-67	259	1	S
SMAC_Scaffolded_contig_191231	gi|224381666|ref|NC_011462.1|NC_011462_TGU1	84.54	194	26	2	3	196	7775890	7775701	3e-52	210	1	S
SMAC_Scaffolded_contig_177366	gi|224381666|ref|NC_011462.1|NC_011462_TGU1	73.53	442	69	15	1	434	7782107	7781706	5e-63	246	2	S
SMAC_Scaffolded_contig_145280	gi|224381666|ref|NC_011462.1|NC_011462_TGU1	76.16	1493	196	33	317	1735	7791042	7789636	0	1086	1	S
SMAC_Scaffolded_contig_73984	gi|224381666|ref|NC_011462.1|NC_011462_TGU1	71.95	2210	430	36	1404	3603	7794238	7796267	0	1200	7	M
SMAC_Scaffolded_contig_189367	gi|224381666|ref|NC_011462.1|NC_011462_TGU1	79.24	713	122	12	14	713	7800776	7800077	4e-166	589	1	S
SMAC_Scaffolded_contig_177199	gi|224381666|ref|NC_011462.1|NC_011462_TGU1	76.83	876	119	12	872	1736	7801946	7802748	0	686	2	S
SMAC_Scaffolded_contig_173011	gi|224381666|ref|NC_011462.1|NC_011462_TGU1	71.92	851	154	21	14	822	7803959	7804766	5e-121	439	1	S
SMAC_Scaffolded_contig_183232	gi|224381666|ref|NC_011462.1|NC_011462_TGU1	80.36	336	55	4	1	334	7803982	7803656	2e-79	300	1	S
SMAC_Scaffolded_contig_119324	gi|224381666|ref|NC_011462.1|NC_011462_TGU1	72.64	1060	212	25	26	1037	7808040	7807011	7e-158	562	1	S
SMAC_Scaffolded_contig_71474	gi|224381666|ref|NC_011462.1|NC_011462_TGU1	76.84	354	57	8	1057	1399	7811154	7810815	2e-65	255	73	M
SMAC_Scaffolded_contig_71473	gi|224381666|ref|NC_011462.1|NC_011462_TGU1	69.48	2071	394	52	170	2127	7813080	7815025	0	866	10204	M
SMAC_Scaffolded_contig_145791	gi|224381666|ref|NC_011462.1|NC_011462_TGU1	74.63	879	194	9	12	880	7824557	7823698	6e-159	565	9605	M
SMAC_Scaffolded_contig_19274	gi|224381666|ref|NC_011462.1|NC_011462_TGU1	70.18	2448	471	61	1780	4108	7831590	7833897	0	1083	9052	M
SMAC_Scaffolded_contig_116905	gi|224381666|ref|NC_011462.1|NC_011462_TGU1	79.14	839	130	18	634	1454	7843276	7844087	0	684	7709	M
SMAC_Scaffolded_contig_32358	gi|224381666|ref|NC_011462.1|NC_011462_TGU1	74.43	3089	528	76	3307	6284	7850751	7847814	0	1903	94	M
SMAC_Scaffolded_contig_24807	gi|224381666|ref|NC_011462.1|NC_011462_TGU1	77.78	405	70	6	1077	1476	7857775	7857386	9e-84	316	95	M
SMAC_Scaffolded_contig_35120	gi|224381666|ref|NC_011462.1|NC_011462_TGU1	71.59	3872	624	96	8815	12510	7861784	7865355	0	2021	88	M
SMAC_Scaffolded_contig_131271	gi|224381666|ref|NC_011462.1|NC_011462_TGU1	74.77	1871	339	25	221	2054	7867136	7865362	0	1254	2	M
SMAC_Scaffolded_contig_63550	gi|224381666|ref|NC_011462.1|NC_011462_TGU1	75.6	2529	422	72	6123	8560	7871280	7868856	0	1631	9	M
SMAC_Scaffolded_contig_161607	gi|224381666|ref|NC_011462.1|NC_011462_TGU1	76.64	886	167	20	2	855	7875809	7876686	1e-172	610	1	S
SMAC_Scaffolded_contig_153551	gi|224381666|ref|NC_011462.1|NC_011462_TGU1	88.89	36	4	0	1768	1803	7879105	7879070	0.007	48	74	M
SMAC_Scaffolded_contig_55535	gi|224381666|ref|NC_011462.1|NC_011462_TGU1	73.47	2620	503	51	19077	21623	7879672	7877172	0	1535	37	M
SMAC_Scaffolded_contig_129832	gi|224381666|ref|NC_011462.1|NC_011462_TGU1	75.34	738	146	12	2220	2948	7910588	7909878	1e-135	489	3	S
SMAC_Scaffolded_contig_148689	gi|224381666|ref|NC_011462.1|NC_011462_TGU1	73.63	565	98	17	3	538	7912916	7912374	5e-84	316	41	M
SMAC_Scaffolded_contig_153769	gi|224381666|ref|NC_011462.1|NC_011462_TGU1	72.28	837	161	12	2	826	7913682	7912905	2e-131	473	1	S
SMAC_Scaffolded_contig_162378	gi|224381666|ref|NC_011462.1|NC_011462_TGU1	75.64	312	54	8	15	312	7916531	7916228	1e-50	205	1	S
SMAC_Scaffolded_contig_89680	gi|224381666|ref|NC_011462.1|NC_011462_TGU1	69.48	1268	211	33	5315	6519	7917981	7919135	2e-154	553	1301	M
SMAC_Scaffolded_contig_128346	gi|224381666|ref|NC_011462.1|NC_011462_TGU1	77.63	590	89	16	508	1087	7919676	7919120	1e-119	435	1	S
SMAC_Scaffolded_contig_57903	gi|224381666|ref|NC_011462.1|NC_011462_TGU1	71.51	2299	477	47	23	2264	7925289	7923112	0	1142	5	S
SMAC_Scaffolded_contig_169138	gi|224381666|ref|NC_011462.1|NC_011462_TGU1	70.74	1794	334	45	57	1772	7925294	7926974	0	838	1	S
SMAC_Scaffolded_contig_100667	gi|224381666|ref|NC_011462.1|NC_011462_TGU1	75.14	1440	295	28	2133	3553	7929789	7928394	0	913	4	S
SMAC_Scaffolded_contig_86867	gi|224381666|ref|NC_011462.1|NC_011462_TGU1	74.77	662	140	11	1060	1717	7933440	7932802	1e-113	416	2	S
SMAC_Scaffolded_contig_73769	gi|224381666|ref|NC_011462.1|NC_011462_TGU1	72.21	4080	748	91	73	3943	7949705	7945803	0	2183	2311	M
SMAC_Scaffolded_contig_176763	gi|224381666|ref|NC_011462.1|NC_011462_TGU1	79.17	696	129	10	138	827	7949880	7950565	1e-160	571	1	S
SMAC_Scaffolded_contig_170490	gi|224381666|ref|NC_011462.1|NC_011462_TGU1	77.25	1121	200	14	8	1108	7952183	7951098	0	859	1	S
SMAC_Scaffolded_contig_141037	gi|224381666|ref|NC_011462.1|NC_011462_TGU1	78.23	804	127	11	5	789	7955210	7955984	0	655	2	S
SMAC_Scaffolded_contig_125557	gi|224381666|ref|NC_011462.1|NC_011462_TGU1	70.61	1031	215	21	24	1003	7955991	7956984	8e-133	479	2	S
SMAC_Scaffolded_contig_63615	gi|224381666|ref|NC_011462.1|NC_011462_TGU1	73.74	2125	373	29	11199	13235	7961927	7963954	0	1353	801	M
SMAC_Scaffolded_contig_91205	gi|224381666|ref|NC_011462.1|NC_011462_TGU1	77.8	1009	178	16	34	1038	7963953	7964919	0	780	2	S
SMAC_Scaffolded_contig_189064	gi|224381666|ref|NC_011462.1|NC_011462_TGU1	93.1	29	2	0	487	515	7975063	7975091	0.024	44	43	M
SMAC_Scaffolded_contig_8211	gi|224381666|ref|NC_011462.1|NC_011462_TGU1	70.94	2216	428	44	2193	4246	7975140	7977301	0	1090	1497	M
SMAC_Scaffolded_contig_1639	gi|224381666|ref|NC_011462.1|NC_011462_TGU1	76.26	5274	868	96	11411	16532	7985309	7980268	0	3781	13	M
SMAC_Scaffolded_contig_22214	gi|224381666|ref|NC_011462.1|NC_011462_TGU1	75.65	5338	909	104	26760	31954	8008658	8013747	0	3649	502	M
SMAC_Scaffolded_contig_36615	gi|224381666|ref|NC_011462.1|NC_011462_TGU1	77.47	799	132	13	1305	2076	8015349	8014572	3e-173	614	6	M
SMAC_Scaffolded_contig_123545	gi|224381666|ref|NC_011462.1|NC_011462_TGU1	74.79	1940	328	43	186	2075	8018976	8017148	0	1245	3	M
SMAC_Scaffolded_contig_168509	gi|224381666|ref|NC_011462.1|NC_011462_TGU1	70.85	199	33	4	25	198	8019011	8019209	1e-19	102	67	M
SMAC_Scaffolded_contig_95530	gi|224381666|ref|NC_011462.1|NC_011462_TGU1	74.97	899	168	16	60	934	8022856	8023721	2e-165	587	2	M
SMAC_Scaffolded_contig_23492	gi|224381666|ref|NC_011462.1|NC_011462_TGU1	73.75	6202	1190	137	39360	45428	8058578	8064474	0	3622	7479	M
SMAC_Scaffolded_contig_165160	gi|224381666|ref|NC_011462.1|NC_011462_TGU1	91.35	185	15	1	447	630	8066386	8066202	7e-67	259	1	S
SMAC_Scaffolded_contig_132577	gi|224381666|ref|NC_011462.1|NC_011462_TGU1	77.52	476	84	7	5	463	8068017	8068486	5e-99	365	1	S
SMAC_Scaffolded_contig_158200	gi|224381666|ref|NC_011462.1|NC_011462_TGU1	92.86	28	2	0	144	171	8069289	8069316	0.077	42	29	M
SMAC_Scaffolded_contig_125813	gi|224381666|ref|NC_011462.1|NC_011462_TGU1	75.68	1147	200	23	3917	5057	8070699	8071772	0	778	86	M
SMAC_Scaffolded_contig_77983	gi|224381666|ref|NC_011462.1|NC_011462_TGU1	78.42	1200	194	23	1698	2872	8074509	8073350	0	951	249	M
SMAC_Scaffolded_contig_36959	gi|224381666|ref|NC_011462.1|NC_011462_TGU1	75.56	1710	296	32	70750	72424	8091360	8092982	0	1166	4138	M
SMAC_Scaffolded_contig_144165	gi|224381666|ref|NC_011462.1|NC_011462_TGU1	74.16	1521	309	24	782	2274	8098849	8100313	0	939	2	S
SMAC_Scaffolded_contig_48338	gi|224381666|ref|NC_011462.1|NC_011462_TGU1	75.2	5669	953	109	22433	27847	8106052	8100583	0	3802	102	M
SMAC_Scaffolded_contig_152231	gi|224381666|ref|NC_011462.1|NC_011462_TGU1	71.96	1398	260	25	550	1918	8108782	8110076	0	760	3	S
SMAC_Scaffolded_contig_10496	gi|224381666|ref|NC_011462.1|NC_011462_TGU1	71.88	1860	363	36	4013	5820	8128962	8127211	0	978	6	S
SMAC_Scaffolded_contig_185287	gi|224381666|ref|NC_011462.1|NC_011462_TGU1	72.25	573	131	13	12	574	8139149	8138595	2e-74	284	1	S
SMAC_Scaffolded_contig_103747	gi|224381666|ref|NC_011462.1|NC_011462_TGU1	70.59	3836	719	89	4850	8436	8139387	8143062	0	1801	7	M
SMAC_Scaffolded_contig_188344	gi|224381666|ref|NC_011462.1|NC_011462_TGU1	73.99	642	122	9	78	716	8146447	8147046	8e-111	405	2	M
SMAC_Scaffolded_contig_181795	gi|224381666|ref|NC_011462.1|NC_011462_TGU1	74.11	815	155	20	50	831	8149208	8148417	5e-133	479	1	S
SMAC_Scaffolded_contig_135752	gi|224381666|ref|NC_011462.1|NC_011462_TGU1	66.45	760	124	18	1028	1773	8149903	8149261	2e-66	259	1	S
SMAC_Scaffolded_contig_72480	gi|224381666|ref|NC_011462.1|NC_011462_TGU1	70.62	725	113	17	2667	3376	8152821	8152182	9e-97	361	4	S
SMAC_Scaffolded_contig_47381	gi|224381666|ref|NC_011462.1|NC_011462_TGU1	69.52	1696	363	48	13261	14917	8160125	8158545	0	650	13	M
SMAC_Scaffolded_contig_167780	gi|224381666|ref|NC_011462.1|NC_011462_TGU1	70.73	574	99	13	6	567	8161748	8161232	5e-74	282	1	S
SMAC_Scaffolded_contig_183688	gi|224381666|ref|NC_011462.1|NC_011462_TGU1	74.64	343	76	7	12	344	8165455	8165796	2e-50	205	2	S
SMAC_Scaffolded_contig_107299	gi|224381666|ref|NC_011462.1|NC_011462_TGU1	73.54	601	127	13	27	608	8167095	8166508	9e-91	338	1	S
SMAC_Scaffolded_contig_102449	gi|224381666|ref|NC_011462.1|NC_011462_TGU1	72.48	2035	366	51	1545	3478	8173609	8171668	0	1090	6	M
SMAC_Scaffolded_contig_115101	gi|224381666|ref|NC_011462.1|NC_011462_TGU1	73.01	2505	510	53	2938	5355	8177695	8175270	0	1380	3597	M
SMAC_Scaffolded_contig_183543	gi|224381666|ref|NC_011462.1|NC_011462_TGU1	82.76	174	19	4	22	195	8179307	8179469	2e-39	170	1	S
SMAC_Scaffolded_contig_85393	gi|224381666|ref|NC_011462.1|NC_011462_TGU1	68.69	297	63	8	16	303	8179681	8179956	2e-21	107	1	S
SMAC_Scaffolded_contig_19045	gi|224381666|ref|NC_011462.1|NC_011462_TGU1	72.87	575	99	21	4527	5065	8180030	8180583	1e-75	291	1	S
SMAC_Scaffolded_contig_119026	gi|224381666|ref|NC_011462.1|NC_011462_TGU1	79.44	107	21	1	6609	6715	8185057	8184952	7e-15	91	609	M
SMAC_Scaffolded_contig_178757	gi|224381666|ref|NC_011462.1|NC_011462_TGU1	74.1	749	139	12	33	748	8189315	8190041	2e-131	473	1	S
SMAC_Scaffolded_contig_59939	gi|224381666|ref|NC_011462.1|NC_011462_TGU1	74.69	1450	285	23	14972	16391	8192583	8193980	0	931	10043	M
SMAC_Scaffolded_contig_127329	gi|224381666|ref|NC_011462.1|NC_011462_TGU1	75.75	1031	211	20	1817	2830	8201980	8200972	0	677	6	M
SMAC_Scaffolded_contig_122366	gi|224381666|ref|NC_011462.1|NC_011462_TGU1	78.29	129	28	0	573	701	8207214	8207086	4e-21	107	1	S
SMAC_Scaffolded_contig_85130	gi|224381666|ref|NC_011462.1|NC_011462_TGU1	72.68	366	69	8	639	1003	8207224	8207559	1e-48	201	1	S
SMAC_Scaffolded_contig_174108	gi|224381666|ref|NC_011462.1|NC_011462_TGU1	71.85	373	70	10	2	371	8207559	8207219	6e-45	187	1	S
SMAC_Scaffolded_contig_169457	gi|224381666|ref|NC_011462.1|NC_011462_TGU1	80.72	249	48	0	602	850	8208985	8208737	4e-59	233	1	S
SMAC_Scaffolded_contig_62549	gi|224381666|ref|NC_011462.1|NC_011462_TGU1	86.22	312	43	0	2708	3019	8209551	8209240	3e-99	369	183	M
SMAC_Scaffolded_contig_176742	gi|224381666|ref|NC_011462.1|NC_011462_TGU1	70.11	435	90	9	118	538	8213920	8214328	2e-47	194	2	S
SMAC_Scaffolded_contig_149589	gi|224381666|ref|NC_011462.1|NC_011462_TGU1	64.41	503	124	12	258	739	8213966	8214434	6e-18	96	40	M
SMAC_Scaffolded_contig_172918	gi|224381666|ref|NC_011462.1|NC_011462_TGU1	78.67	558	93	9	13	557	8219070	8218526	4e-125	453	1	S
SMAC_Scaffolded_contig_178456	gi|224381666|ref|NC_011462.1|NC_011462_TGU1	76.29	329	46	10	39	356	8219502	8219195	4e-57	226	1	S
SMAC_Scaffolded_contig_108741	gi|224381666|ref|NC_011462.1|NC_011462_TGU1	70.78	510	71	17	4363	4851	8219647	8219195	4e-61	242	1	S
SMAC_Scaffolded_contig_164207	gi|224381666|ref|NC_011462.1|NC_011462_TGU1	77.51	538	78	15	297	807	8220191	8219670	5e-108	396	2	M
SMAC_Scaffolded_contig_31487	gi|224381666|ref|NC_011462.1|NC_011462_TGU1	78.28	594	115	6	4688	5278	8221326	8220744	6e-131	475	11	M
SMAC_Scaffolded_contig_3685	gi|224381666|ref|NC_011462.1|NC_011462_TGU1	72.25	382	83	6	253	626	8223884	8224250	5e-50	205	4	M
SMAC_Scaffolded_contig_191174	gi|224381666|ref|NC_011462.1|NC_011462_TGU1	70.14	509	95	16	44	526	8224790	8224313	7e-53	212	2	M
SMAC_Scaffolded_contig_191456	gi|224381666|ref|NC_011462.1|NC_011462_TGU1	75.84	356	59	9	314	643	8225362	8225008	7e-61	239	2	M
SMAC_Scaffolded_contig_38514	gi|224381666|ref|NC_011462.1|NC_011462_TGU1	72.18	1391	263	32	2175	3536	8228479	8227184	0	731	4538	M
SMAC_Scaffolded_contig_167868	gi|224381666|ref|NC_011462.1|NC_011462_TGU1	86.05	43	2	2	68	107	8238189	8238230	0.011	46	44	M
SMAC_Scaffolded_contig_72759	gi|224381666|ref|NC_011462.1|NC_011462_TGU1	72.72	1734	335	35	3153	4824	8246116	8244459	0	962	2507	M
SMAC_Scaffolded_contig_22498	gi|224381666|ref|NC_011462.1|NC_011462_TGU1	74.71	1107	234	19	5509	6587	8252632	8251544	0	690	10	M
SMAC_Scaffolded_contig_136302	gi|224381666|ref|NC_011462.1|NC_011462_TGU1	70.04	1108	204	24	10	1071	8274365	8275390	4e-142	509	2	M
SMAC_Scaffolded_contig_143635	gi|224381666|ref|NC_011462.1|NC_011462_TGU1	73.62	1035	211	21	134	1155	8276493	8275508	1e-168	598	1	S
SMAC_Scaffolded_contig_98158	gi|224381666|ref|NC_011462.1|NC_011462_TGU1	72.43	3928	755	84	22645	26394	8276762	8280539	0	2118	21	M
SMAC_Scaffolded_contig_158031	gi|224381666|ref|NC_011462.1|NC_011462_TGU1	71.99	664	134	13	1	649	8281556	8280930	2e-93	347	1	S
SMAC_Scaffolded_contig_97845	gi|224381666|ref|NC_011462.1|NC_011462_TGU1	72.02	922	189	12	1115	2004	8283974	8284858	4e-141	508	7	M
SMAC_Scaffolded_contig_13686	gi|224381666|ref|NC_011462.1|NC_011462_TGU1	68.44	1033	203	23	46	1064	8289516	8288593	2e-109	401	6	M
SMAC_Scaffolded_contig_159317	gi|224381666|ref|NC_011462.1|NC_011462_TGU1	67.92	293	74	8	21	303	8290375	8290657	2e-15	87	38	M
SMAC_Scaffolded_contig_97469	gi|224381666|ref|NC_011462.1|NC_011462_TGU1	74.07	1377	257	28	11460	12788	8297948	8296624	0	838	16	M
SMAC_Scaffolded_contig_187700	gi|224381666|ref|NC_011462.1|NC_011462_TGU1	76.16	797	137	14	14	779	8304306	8305080	4e-159	565	1	S
SMAC_Scaffolded_contig_29065	gi|224381666|ref|NC_011462.1|NC_011462_TGU1	71.51	1162	233	31	1941	3073	8315157	8316249	2e-154	553	4	S
SMAC_Scaffolded_contig_106071	gi|224381666|ref|NC_011462.1|NC_011462_TGU1	82.39	284	44	2	1107	1387	8320488	8320768	6e-74	284	1	S
SMAC_Scaffolded_contig_93986	gi|224381666|ref|NC_011462.1|NC_011462_TGU1	71.33	1538	290	28	6366	7858	8328071	8329502	0	796	2239	M
SMAC_Scaffolded_contig_178703	gi|224381666|ref|NC_011462.1|NC_011462_TGU1	72.85	442	82	14	10	429	8335435	8335860	1e-57	228	1	S
SMAC_Scaffolded_contig_35723	gi|224381666|ref|NC_011462.1|NC_011462_TGU1	73.99	2026	362	42	4743	6721	8337844	8335937	0	1238	7	S
SMAC_Scaffolded_contig_147524	gi|224381666|ref|NC_011462.1|NC_011462_TGU1	85	40	6	0	1005	1044	8341905	8341866	0.017	46	88	M
SMAC_Scaffolded_contig_143377	gi|224381666|ref|NC_011462.1|NC_011462_TGU1	73.03	990	196	17	21	971	8342083	8341126	5e-160	569	2	M
SMAC_Scaffolded_contig_180602	gi|224381666|ref|NC_011462.1|NC_011462_TGU1	76.92	390	76	6	14	403	8352362	8351987	2e-74	284	2	S
SMAC_Scaffolded_contig_68939	gi|224381666|ref|NC_011462.1|NC_011462_TGU1	75.81	1166	219	19	432	1576	8353387	8352264	0	803	1541	M
SMAC_Scaffolded_contig_111318	gi|224381666|ref|NC_011462.1|NC_011462_TGU1	73.03	838	158	17	347	1169	8354226	8353442	3e-132	477	1	S
SMAC_Scaffolded_contig_180699	gi|224381666|ref|NC_011462.1|NC_011462_TGU1	71.87	775	147	22	2	740	8361151	8360412	4e-103	379	1	S
SMAC_Scaffolded_contig_79772	gi|224381666|ref|NC_011462.1|NC_011462_TGU1	72.34	1985	399	43	14777	16720	8361177	8363052	0	1047	395	M
SMAC_Scaffolded_contig_68282	gi|224381666|ref|NC_011462.1|NC_011462_TGU1	70.96	365	69	8	327	683	8365060	8365395	6e-43	179	1	S
SMAC_Scaffolded_contig_104298	gi|224381666|ref|NC_011462.1|NC_011462_TGU1	74.62	2017	370	31	6932	8848	8386619	8384645	0	1317	1735	M
SMAC_Scaffolded_contig_165697	gi|224381666|ref|NC_011462.1|NC_011462_TGU1	75.97	1165	217	16	55	1188	8391525	8392657	0	823	2	M
SMAC_Scaffolded_contig_138661	gi|224381666|ref|NC_011462.1|NC_011462_TGU1	73.04	1710	334	35	208	1894	8394643	8393038	0	962	5	M
SMAC_Scaffolded_contig_126945	gi|224381666|ref|NC_011462.1|NC_011462_TGU1	73.85	654	128	15	4	632	8400233	8399598	3e-103	379	1	S
SMAC_Scaffolded_contig_5524	gi|224381666|ref|NC_011462.1|NC_011462_TGU1	74.2	5943	1125	100	2	5829	8410767	8405118	0	3723	6633	M
SMAC_Scaffolded_contig_5525	gi|224381666|ref|NC_011462.1|NC_011462_TGU1	74.53	1932	361	36	1585	3477	8412131	8413970	0	1222	3408	M
SMAC_Scaffolded_contig_80861	gi|224381666|ref|NC_011462.1|NC_011462_TGU1	72.03	3236	638	68	21	3152	8416747	8419819	0	1691	72	M
SMAC_Scaffolded_contig_165419	gi|224381666|ref|NC_011462.1|NC_011462_TGU1	73.01	1938	347	41	600	2447	8428010	8426159	0	1112	3	M
SMAC_Scaffolded_contig_191002	gi|224381666|ref|NC_011462.1|NC_011462_TGU1	67.36	772	133	22	1	753	8429099	8428428	2e-68	264	1	S
SMAC_Scaffolded_contig_152014	gi|224381666|ref|NC_011462.1|NC_011462_TGU1	83.16	95	16	0	1	95	8431869	8431963	1e-18	100	3	M
SMAC_Scaffolded_contig_180853	gi|224381666|ref|NC_011462.1|NC_011462_TGU1	77.55	294	42	6	344	625	8432073	8432354	1e-57	228	2	M
SMAC_Scaffolded_contig_168301	gi|224381666|ref|NC_011462.1|NC_011462_TGU1	78.15	151	14	4	116	261	8433974	8434110	3e-26	123	3	M
SMAC_Scaffolded_contig_109879	gi|224381666|ref|NC_011462.1|NC_011462_TGU1	72.78	3277	640	65	59	3193	8434331	8437497	0	1822	2	M
SMAC_Scaffolded_contig_42227	gi|224381666|ref|NC_011462.1|NC_011462_TGU1	77.98	436	67	8	73	489	8439625	8439200	6e-92	343	5984	M
SMAC_Scaffolded_contig_65850	gi|224381666|ref|NC_011462.1|NC_011462_TGU1	74.19	2367	431	48	2613	4870	8444700	8442405	0	1460	1428	M
SMAC_Scaffolded_contig_176908	gi|224381666|ref|NC_011462.1|NC_011462_TGU1	72.81	228	36	10	341	553	8458368	8458584	2e-22	111	1	S
SMAC_Scaffolded_contig_179718	gi|224381666|ref|NC_011462.1|NC_011462_TGU1	81.54	130	24	0	666	795	8458706	8458835	4e-27	127	1	S
SMAC_Scaffolded_contig_121712	gi|224381666|ref|NC_011462.1|NC_011462_TGU1	92.78	180	12	1	10	188	8459129	8458950	5e-67	262	1	S
SMAC_Scaffolded_contig_8631	gi|224381666|ref|NC_011462.1|NC_011462_TGU1	73.66	5990	1106	120	26864	32685	8472844	8478529	0	3573	29	M
SMAC_Scaffolded_contig_89704	gi|224381666|ref|NC_011462.1|NC_011462_TGU1	73.5	2532	479	52	89	2570	8476777	8474388	0	1480	3	M
SMAC_Scaffolded_contig_178228	gi|224381666|ref|NC_011462.1|NC_011462_TGU1	85.07	442	55	4	267	698	8483830	8483390	9e-137	491	2	M
SMAC_Scaffolded_contig_116014	gi|224381666|ref|NC_011462.1|NC_011462_TGU1	71.78	2512	531	44	2061	4454	8492167	8494618	0	1296	3	M
SMAC_Scaffolded_contig_88045	gi|224381666|ref|NC_011462.1|NC_011462_TGU1	70.13	3970	716	91	2704	6548	8498253	8501877	0	1826	4350	M
SMAC_Scaffolded_contig_137160	gi|224381666|ref|NC_011462.1|NC_011462_TGU1	73.25	1387	259	27	45	1365	8515150	8516490	0	809	1309	M
SMAC_Scaffolded_contig_40800	gi|224381666|ref|NC_011462.1|NC_011462_TGU1	71.94	4811	960	114	1706	6388	8522477	8517929	0	2428	2264	M
SMAC_Scaffolded_contig_16418	gi|224381666|ref|NC_011462.1|NC_011462_TGU1	72.94	1297	255	19	294	1558	8525424	8524192	0	758	274	M
SMAC_Scaffolded_contig_107987	gi|224381666|ref|NC_011462.1|NC_011462_TGU1	75.52	3803	678	60	144	3832	8525433	8529096	0	2619	8	M
SMAC_Scaffolded_contig_39081	gi|224381666|ref|NC_011462.1|NC_011462_TGU1	75.09	5254	1000	88	19608	24728	8544270	8539193	0	3456	2198	M
SMAC_Scaffolded_contig_159021	gi|224381666|ref|NC_011462.1|NC_011462_TGU1	72.57	1484	281	24	39	1465	8553143	8551729	0	847	1	S
SMAC_Scaffolded_contig_140026	gi|224381666|ref|NC_011462.1|NC_011462_TGU1	70.86	1057	203	24	12	1032	8558156	8557169	2e-140	504	1	S
SMAC_Scaffolded_contig_140027	gi|224381666|ref|NC_011462.1|NC_011462_TGU1	74.26	1488	281	29	1	1434	8558591	8560030	0	919	10	M
[truncated: 191,586 more rows]
