# Supplementary material for: A Multi-Platform Draft de novo Genome Assembly and Comparative Analysis for the Scarlet Macaw (Ara macao)
Source: PLoS One. 2013 May 8;8(5):e62415. doi: 10.1371/journal.pone.0062415 (PMC3648530; doi:10.1371/journal.pone.0062415)
Supplement: Table S13 — Summary of scarlet macaw functional annotation analysis using DAVID. (XLSX) [file pone.0062415.s014.xlsx]

## Sheet: DAVID_Chart_Chicken
Category	Term	Count	%	PValue	Genes	List Total	Pop Hits	Pop Total	Fold Enrichment	Bonferroni	Benjamini	FDR		Background =	Gallus
CHROMOSOME	3	384	4.15135	3.62852e-06	1224564, 1223039, 1208302, 1227405, 1212771, 1205950, 1220848, 1226947, 1210842, 1207956, 1208175, 1223420, 1221706, 1224963, 1209195, 1205592, 1214644, 1227193, 1218494, 1227195, 1208273, 1218492, 1227696, 1219610, 1206441, 1225584, 1227414, 1210023, 1213635, 1212376, 1224189, 1221300, 1220267, 1225026, 1224454, 1217287, 1216765, 1225028, 1219222, 1206308, 1219758, 1212370, 1224453, 1206014, 122…	4412	1296	18177	1.22071	0.000119734	0.000119734	0.00316711
CHROMOSOME	2	437	4.72432	1.3371e-05	1221412, 1226178, 1227685, 1227403, 1225593, 1212388, 1218497, 1218496, 1220787, 1206023, 1208963, 1213923, 1208920, 1208912, 1207052, 1208955, 1205053, 1211245, 1215033, 1207547, 1206017, 1220772, 1214241, 1206962, 1225992, 1214639, 1220779, 1213106, 1219616, 1221812, 1224055, 1214661, 1213133, 1215370, 1225572, 1221438, 1218094, 1211276, 1214259, 1214254, 1225171, 1218475, 1215904, 1218374, 121…	4412	1514	18177	1.18917	0.00044115	0.000220599	0.0116703
CHROMOSOME	9	141	1.52432	0.00210575	1208300, 1216892, 1209309, 1221504, 1208403, 1211768, 1222832, 1215621, 1217310, 1216506, 1226031, 1211552, 1226036, 1217313, 1208480, 1206767, 1217196, 1222269, 1207449, 1208914, 1223126, 1207772, 1221899, 1226839, 1205424, 1209839, 1224955, 1207540, 1220262, 1209930, 1220064, 1212872, 1225371, 1225189, 1217925, 1208503, 1219145, 1208696, 1211907, 1210207, 1226098, 1215998, 1218161, 1224151, 121…	4412	465	18177	1.24926	0.0671988	0.022921	1.82313
CHROMOSOME	1	631	6.82162	0.00355207	1221413, 1226173, 1207142, 1214782, 1219740, 1214506, 1218763, 1213251, 1227543, 1222061, 1220844, 1207952, 1214502, 1212382, 1221115, 1212385, 1221116, 1213928, 1211253, 1224037, 1208275, 1221802, 1212281, 1226938, 1215243, 1206822, 1218081, 1206192, 1220164, 1218083, 1205050, 1205196, 1221406, 1206960, 1221713, 1226048, 1225185, 1205587, 1220060, 1219615, 1215273, 1226198, 1214359, 1222080, 122…	4412	2377	18177	1.09367	0.110795	0.02893	3.05821
CHROMOSOME	7	158	1.70811	0.00366642	1218079, 1223139, 1220356, 1216253, 1217012, 1219889, 1217634, 1227404, 1222838, 1209102, 1208675, 1218742, 1214950, 1221289, 1220253, 1208107, 1227011, 1216068, 1216155, 1216757, 1224965, 1219609, 1223327, 1217091, 1211963, 1221895, 1207448, 1218178, 1226358, 1212064, 1211778, 1225580, 1209388, 1226219, 1216763, 1227185, 1220634, 1223122, 1221399, 1221695, 1223020, 1206644, 1222002, 1213712, 120…	4412	535	18177	1.21672	0.114156	0.0239514	3.15527
CHROMOSOME	Z	237	2.56216	0.00599257	1225595, 1226948, 1220989, 1220353, 1223748, 1216308, 1221416, 1206954, 1209250, 1205433, 1224462, 1226415, 1209052, 1220648, 1219886, 1219337, 1217095, 1224558, 1227550, 1221302, 1215387, 1206297, 1216764, 1206587, 1208288, 1214779, 1214245, 1221106, 1215137, 1212120, 1224857, 1223333, 1217462, 1226821, 1220373, 1219490, 1210139, 1226299, 1210135, 1209804, 1209274, 1223448, 1207978, 1227666, 121…	4412	843	18177	1.15826	0.179917	0.0325179	5.11112
CHROMOSOME	10	133	1.43784	0.00792472	1217483, 1216209, 1213525, 1213527, 1212604, 1225513, 1221582, 1217393, 1208483, 1218101, 1214232, 1221114, 1209050, 1218748, 1214376, 1224968, 1225423, 1224758, 1205102, 1217495, 1224044, 1210786, 1218809, 1227361, 1211978, 1217723, 1225045, 1213247, 1225235, 1225788, 1220819, 1225438, 1220777, 1213646, 1219144, 1218228, 1207641, 1217669, 1223112, 1208227, 1212922, 1210864, 1219954, 1222385, 121…	4412	451	18177	1.21496	0.230918	0.0368135	6.709
CHROMOSOME	21	78	0.843243	0.0130053	1215324, 1208203, 1210983, 1223173, 1209097, 1208062, 1225705, 1207494, 1215669, 1205911, 1218554, 1215498, 1211829, 1223986, 1206912, 1225053, 1227470, 1218490, 1219981, 1218204, 1216718, 1221803, 1221394, 1208507, 1208685, 1216050, 1216267, 1213676, 1207056, 1205735, 1225134, 1212832, 1215726, 1227513, 1225886, 1214914, 1217962, 1214381, 1214011, 1221337, 1227255, 1218784, 1212428, 1213026, 122…	4412	252	18177	1.27521	0.350785	0.0525668	10.7976
CHROMOSOME	8	157	1.6973	0.034826	1221319, 1205384, 1212880, 1210849, 1221503, 1224650, 1220811, 1208104, 1216154, 1217939, 1209055, 1215620, 1211966, 1225058, 1215568, 1212207, 1227198, 1211448, 1211558, 1222067, 1223429, 1217214, 1207629, 1217936, 1224757, 1220830, 1222192, 1205190, 1216161, 1209721, 1220369, 1219427, 1226215, 1217306, 1209838, 1222636, 1216768, 1223434, 1206113, 1225237, 1225901, 1212402, 1216931, 1210650, 121…	4412	565	18177	1.14482	0.689554	0.12188	26.6112
CHROMOSOME	15	110	1.18919	0.0366784	1222640, 1216251, 1225369, 1221187, 1214580, 1220057, 1218936, 1210091, 1206121, 1221583, 1213258, 1216610, 1216202, 1221305, 1207051, 1215380, 1222197, 1211249, 1226838, 1217721, 1225049, 1208780, 1220568, 1217186, 1224048, 1213386, 1215248, 1216933, 1206939, 1221626, 1226825, 1216337, 1227250, 1226246, 1218576, 1223969, 1222569, 1215088, 1209173, 1227124, 1218611, 1210280, 1215517, 1206178, 121…	4412	385	18177	1.17711	0.708625	0.116014	27.8315
CHROMOSOME	4	324	3.5027	0.0379618	1217489, 1207043, 1207146, 1213624, 1224035, 1208825, 1215622, 1213523, 1205435, 1225697, 1215771, 1218602, 1221213, 1211559, 1205825, 1216509, 1220551, 1218200, 1224560, 1226937, 1215244, 1221309, 1220167, 1217492, 1215767, 1221515, 1210649, 1227690, 1217490, 1206296, 1223959, 1216762, 1208811, 1218756, 1221204, 1211832, 1213103, 1205838, 1221066, 1220360, 1225588, 1214663, 1213508, 1210865, 122…	4412	1222	18177	1.09235	0.721165	0.109617	28.6664
CHROMOSOME	12	98	1.05946	0.0444467	1205105, 1209255, 1216062, 1215396, 1206959, 1216581, 1208106, 1220256, 1224360, 1205628, 1205829, 1220459, 1206436, 1223032, 1224755, 1222447, 1214575, 1218806, 1214770, 1209521, 1224851, 1206820, 1208189, 1217692, 1209180, 1219621, 1205578, 1207239, 1218819, 1214044, 1207236, 1218478, 1205313, 1220664, 1211980, 1209266, 1220581, 1212914, 1214988, 1212183, 1217328, 1213795, 1213919, 1223189, 121…	4412	342	18177	1.18056	0.776945	0.117528	32.7558
CHROMOSOME	28	65	0.702703	0.0719799	1214409, 1218411, 1207004, 1215124, 1211118, 1216440, 1207216, 1223700, 1206094, 1213159, 1211299, 1213002, 1223031, 1225365, 1213441, 1223331, 1210972, 1211200, 1212780, 1216929, 1222804, 1215674, 1216822, 1216863, 1224718, 1207942, 1223065, 1225372, 1209310, 1212978, 1218908, 1217752, 1208591, 1214185, 1207026, 1216176, 1224019, 1225483, 1209718, 1225149, 1205574, 1213900, 1210713, 1215231, 122…	4412	223	18177	1.20087	0.915005	0.172733	47.9016
COG_ONTOLOGY	Defense mechanisms	10	0.108108	0.0113797	1210588, 1210691, 1212309, 1212219, 1227358, 1223567, 1220779, 1219616, 1221406, 1224906	518	12	1340	2.15573	0.402512	0.402512	10.2042
COG_ONTOLOGY	Cell division and chromosome partitioning	43	0.464865	0.0234603	1223115, 1216061, 1210486, 1216935, 1227357, 1223296, 1215299, 1214185, 1227295, 1211317, 1212170, 1218781, 1220811, 1219845, 1215669, 1215771, 1213023, 1222569, 1205935, 1224136, 1217663, 1212264, 1224806, 1205102, 1220349, 1214512, 1213827, 1208648, 1221346, 1220549, 1226111, 1220952, 1210649, 1222016, 1216573, 1227439, 1209629, 1207361, 1227588, 1205015, 1224048, 1214695, 1220117	518	85	1340	1.30865	0.656406	0.413831	20.0091
CYTOBAND	3	381	4.11892	0.00808509	1224564, 1223039, 1208302, 1227405, 1212771, 1205950, 1220848, 1226947, 1210842, 1207956, 1208175, 1223420, 1221706, 1209195, 1205592, 1214644, 1227193, 1218494, 1227195, 1208273, 1218492, 1227696, 1219610, 1206441, 1225584, 1227414, 1210023, 1213635, 1212376, 1224189, 1221300, 1220267, 1225026, 1224454, 1217287, 1225028, 1219222, 1206308, 1219758, 1212370, 1224453, 1206014, 1223951, 1218368, 121…	4258	1268	15746	1.11114	0.222488	0.222488	6.73638
CYTOBAND	2	434	4.69189	0.0246149	1221412, 1226178, 1227685, 1227403, 1225593, 1212388, 1218497, 1218496, 1220787, 1206023, 1208963, 1213923, 1208920, 1208912, 1207052, 1208955, 1205053, 1211245, 1215033, 1207547, 1206017, 1220772, 1214241, 1206962, 1225992, 1214639, 1220779, 1213106, 1219616, 1221812, 1224055, 1214661, 1213133, 1215370, 1225572, 1221438, 1218094, 1211276, 1214259, 1214254, 1225171, 1218475, 1215904, 1218374, 121…	4258	1481	15746	1.08368	0.538194	0.320437	19.274
CYTOBAND	9	141	1.52432	0.054643	1208300, 1216892, 1209309, 1221504, 1208403, 1211768, 1222832, 1215621, 1217310, 1216506, 1226031, 1211552, 1226036, 1217313, 1208480, 1206767, 1217196, 1222269, 1207449, 1208914, 1223126, 1207772, 1221899, 1226839, 1205424, 1209839, 1224955, 1207540, 1220262, 1209930, 1220064, 1212872, 1225371, 1225189, 1217925, 1208503, 1219145, 1208696, 1211907, 1210207, 1226098, 1215998, 1218161, 1224151, 121…	4258	460	15746	1.13351	0.824825	0.440469	38.2911
CYTOBAND	21	78	0.843243	0.087882	1215324, 1208203, 1210983, 1223173, 1209097, 1208062, 1225705, 1207494, 1215669, 1205911, 1218554, 1215498, 1211829, 1223986, 1206912, 1225053, 1227470, 1218490, 1219981, 1218204, 1216718, 1221803, 1221394, 1208507, 1208685, 1216050, 1216267, 1213676, 1207056, 1205735, 1225134, 1212832, 1215726, 1227513, 1225886, 1214914, 1217962, 1214381, 1214011, 1221337, 1227255, 1218784, 1212428, 1213026, 122…	4258	248	15746	1.16307	0.942246	0.509775	54.6263
GOTERM_BP_ALL	GO:0009987~cellular process	1367	14.7784	1.56366e-12	1226848, 1227404, 1207146, 1224035, 1213255, 1221504, 1214782, 1221503, 1226171, 1213251, 1214502, 1220649, 1211829, 1213258, 1221115, 1221116, 1220648, 1225053, 1206023, 1205592, 1218490, 1211150, 1220830, 1207158, 1205190, 1225584, 1215380, 1212278, 1221309, 1208958, 1225580, 1214770, 1218083, 1227690, 1215033, 1221302, 1225046, 1206962, 1225045, 1206014, 1220634, 1212686, 1218899, 1211832, 122…	2095	3806	6441	1.10425	5.40081e-09	5.40081e-09	2.85978e-09
GOTERM_BP_ALL	GO:0016568~chromatin modification	49	0.52973	5.05177e-09	1214782, 1210091, 1217589, 1219831, 1213353, 1206766, 1222403, 1218202, 1221748, 1226983, 1220196, 1211150, 1207703, 1220520, 1225584, 1221891, 1212278, 1205429, 1209621, 1227364, 1213727, 1214967, 1223228, 1219260, 1214816, 1214004, 1213485, 1214638, 1221053, 1225963, 1226302, 1220230, 1214045, 1206243, 1205574, 1209698, 1208460, 1206974, 1220349, 1222829, 1215550, 1220508, 1219159, 1219190, 120…	2095	73	6441	2.06368	1.74487e-05	8.72436e-06	9.23932e-06
GOTERM_BP_ALL	GO:0016043~cellular component organization	248	2.68108	4.20488e-05	1226848, 1210847, 1207146, 1208673, 1209925, 1214782, 1213629, 1220256, 1217589, 1216506, 1211829, 1224963, 1218202, 1218602, 1205822, 1224969, 1205959, 1225423, 1227195, 1211150, 1207158, 1208914, 1225584, 1226939, 1224558, 1212278, 1205429, 1218083, 1214770, 1215033, 1224454, 1224457, 1221302, 1225022, 1212686, 1217699, 1214638, 1219895, 1226198, 1221053, 1206187, 1225963, 1209275, 1218788, 120…	2095	622	6441	1.22583	0.135185	0.04726	0.0768763
GOTERM_BP_ALL	GO:0051276~chromosome organization	73	0.789189	6.26827e-05	1219438, 1208673, 1214782, 1210091, 1217589, 1219831, 1222547, 1213353, 1206766, 1222403, 1218202, 1221748, 1226983, 1224758, 1216119, 1211150, 1220196, 1207703, 1220520, 1225584, 1221891, 1212278, 1205429, 1209621, 1214770, 1227364, 1207406, 1213727, 1214967, 1221302, 1223228, 1219260, 1214816, 1217768, 1214004, 1213485, 1214638, 1221053, 1213477, 1205362, 1210828, 1226093, 1225963, 1205543, 122…	2095	151	6441	1.48633	0.194678	0.0526894	0.11458
GOTERM_BP_ALL	GO:0043412~biopolymer modification	276	2.98378	0.000241085	1226848, 1210847, 1217488, 1220356, 1227404, 1209925, 1207041, 1214782, 1221503, 1209254, 1217589, 1220256, 1223420, 1210576, 1224462, 1222069, 1213258, 1211253, 1219886, 1211150, 1221803, 1220830, 1224181, 1215244, 1212278, 1209521, 1225046, 1227185, 1209044, 1223439, 1206820, 1208189, 1214638, 1219895, 1224857, 1225189, 1221053, 1215608, 1225963, 1222691, 1210753, 1220230, 1224981, 1211272, 121…	2095	716	6441	1.18513	0.565174	0.153429	0.44001
GOTERM_BP_ALL	GO:0030030~cell projection organization	51	0.551351	0.000262748	1209309, 1216060, 1206128, 1227011, 1216506, 1215464, 1211960, 1218602, 1209012, 1210889, 1205822, 1205666, 1224969, 1207158, 1213442, 1210315, 1226939, 1218083, 1221302, 1210504, 1215825, 1224299, 1225022, 1215726, 1213070, 1208641, 1226198, 1227257, 1206187, 1224403, 1205222, 1218336, 1218788, 1211530, 1215687, 1227490, 1225072, 1210416, 1220408, 1213655, 1207899, 1208414, 1212187, 1226707, 122…	2095	101	6441	1.55245	0.596529	0.140389	0.479458
GOTERM_BP_ALL	GO:0016569~covalent chromatin modification	24	0.259459	0.000581617	1220349, 1221053, 1220520, 1215550, 1212278, 1214782, 1225963, 1213727, 1226302, 1217432, 1217589, 1220230, 1223228, 1214045, 1214816, 1219260, 1213353, 1206766, 1205574, 1214004, 1213485, 1226983, 1214638, 1211150	2095	39	6441	1.89198	0.865943	0.249541	1.0584
GOTERM_BP_ALL	GO:0051056~regulation of small GTPase mediated signal transduction	60	0.648649	0.000836865	1216993, 1225420, 1226272, 1207147, 1223234, 1208577, 1218935, 1213668, 1208011, 1226794, 1215464, 1217733, 1218041, 1212385, 1209195, 1208381, 1214850, 1226982, 1218494, 1215244, 1209281, 1211779, 1222111, 1222988, 1209142, 1209972, 1217790, 1211691, 1227311, 1223115, 1211133, 1224403, 1225146, 1214461, 1226438, 1219217, 1223097, 1222563, 1214080, 1226536, 1222349, 1221235, 1221161, 1221367, 122…	2095	128	6441	1.44115	0.944521	0.303347	1.51954
GOTERM_BP_ALL	GO:0032502~developmental process	331	3.57838	0.000904275	1225420, 1226848, 1227684, 1208300, 1227404, 1207146, 1208302, 1209925, 1208403, 1224469, 1226947, 1216757, 1224173, 1216506, 1218101, 1211829, 1209820, 1220648, 1206023, 1218602, 1227190, 1205822, 1216509, 1224969, 1225423, 1216202, 1225430, 1207158, 1226939, 1208914, 1215380, 1218083, 1224454, 1224457, 1221302, 1216764, 1225022, 1218756, 1209041, 1212686, 1206447, 1223951, 1225185, 1219895, 122…	2095	888	6441	1.146	0.956053	0.293334	1.64099
GOTERM_BP_ALL	GO:0043170~macromolecule metabolic process	711	7.68649	0.000925179	1226848, 1213112, 1227404, 1207041, 1221503, 1214782, 1213251, 1227543, 1220158, 1224173, 1214502, 1207956, 1222069, 1213258, 1224963, 1225053, 1206023, 1211253, 1205592, 1219886, 1218490, 1224968, 1221803, 1211150, 1224181, 1220830, 1207158, 1219613, 1215244, 1225584, 1215380, 1212278, 1224044, 1221309, 1212376, 1214770, 1227690, 1207941, 1225689, 1225046, 1220161, 1219895, 1214638, 1220060, 120…	2095	2015	6441	1.08484	0.959117	0.273636	1.67862
GOTERM_BP_ALL	GO:0043687~post-translational protein modification	222	2.4	0.00108975	1226848, 1220356, 1227404, 1221503, 1209254, 1214782, 1220256, 1217589, 1210576, 1224462, 1213258, 1222069, 1219886, 1221803, 1211150, 1224181, 1215244, 1209521, 1225046, 1209044, 1227185, 1214638, 1219895, 1206820, 1224857, 1225189, 1221053, 1215608, 1225963, 1222691, 1210753, 1224981, 1220230, 1211272, 1218725, 1213234, 1222699, 1205701, 1206930, 1211530, 1207577, 1224440, 1205574, 1218624, 122…	2095	576	6441	1.18495	0.976857	0.289913	1.97441
GOTERM_BP_ALL	GO:0006816~calcium ion transport	31	0.335135	0.00126022	1227207, 1221954, 1218450, 1208249, 1213520, 1205746, 1213856, 1219818, 1210102, 1220451, 1209015, 1220785, 1223425, 1220002, 1221828, 1205510, 1212415, 1227027, 1211855, 1205899, 1219674, 1222732, 1221021, 1219207, 1211879, 1206159, 1212098, 1218899, 1222414, 1214690, 1211604	2095	57	6441	1.67208	0.987165	0.304387	2.27991
GOTERM_BP_ALL	GO:0006139~nucleobase, nucleoside, nucleotide and nucleic acid metabolic process	344	3.71892	0.00128116	1217488, 1217483, 1209925, 1224035, 1207041, 1209436, 1221504, 1214782, 1210391, 1227543, 1220158, 1217589, 1224173, 1214502, 1212382, 1218101, 1216752, 1209052, 1209820, 1206023, 1224963, 1218202, 1218490, 1225423, 1227195, 1211150, 1225430, 1207158, 1208912, 1225584, 1208583, 1212278, 1207051, 1215380, 1213635, 1224559, 1221309, 1205429, 1214770, 1223897, 1217289, 1216768, 1223958, 1225689, 121…	2095	930	6441	1.13722	0.988061	0.288666	2.31738
GOTERM_BP_ALL	GO:0006996~organelle organization	143	1.54595	0.00135782	1219438, 1225369, 1219128, 1207146, 1208673, 1214782, 1225793, 1206128, 1210091, 1220256, 1217589, 1222547, 1211829, 1206766, 1218202, 1208381, 1205959, 1224758, 1211150, 1209117, 1221896, 1225584, 1226939, 1208914, 1221891, 1212278, 1205429, 1209621, 1214770, 1227364, 1213727, 1208604, 1215033, 1214967, 1224454, 1221302, 1223228, 1210504, 1214305, 1223526, 1212686, 1205771, 1219895, 1214638, 122…	2095	355	6441	1.23845	0.990842	0.28482	2.45442
GOTERM_BP_ALL	GO:0006464~protein modification process	260	2.81081	0.00137828	1226848, 1210847, 1220356, 1227404, 1214782, 1221503, 1209254, 1220256, 1217589, 1223420, 1210576, 1224462, 1222069, 1213258, 1211253, 1219886, 1211150, 1221803, 1220830, 1224181, 1215244, 1209521, 1225046, 1227185, 1209044, 1223439, 1208189, 1214638, 1219895, 1206820, 1224857, 1225189, 1221053, 1215608, 1225963, 1222691, 1210753, 1220230, 1224981, 1211272, 1218725, 1213234, 1223448, 1205701, 122…	2095	687	6441	1.16355	0.991467	0.272099	2.49096
GOTERM_BP_ALL	GO:0044260~cellular macromolecule metabolic process	613	6.62703	0.0014379	1226848, 1227404, 1207041, 1221503, 1214782, 1227543, 1220158, 1224173, 1214502, 1222069, 1213258, 1211253, 1206023, 1225053, 1224963, 1205592, 1219886, 1218490, 1224968, 1221803, 1211150, 1224181, 1220830, 1207158, 1219613, 1215244, 1225584, 1215380, 1212278, 1221309, 1214770, 1227690, 1207941, 1225689, 1225046, 1220161, 1219895, 1214638, 1220060, 1208189, 1206820, 1224857, 1225189, 1221819, 122…	2095	1728	6441	1.09065	0.993057	0.267016	2.59739
GOTERM_BP_ALL	GO:0016070~RNA metabolic process	100	1.08108	0.00144493	1217488, 1208203, 1209436, 1216358, 1220158, 1213830, 1224963, 1218490, 1227195, 1225912, 1215380, 1213727, 1216822, 1217721, 1222393, 1225689, 1220161, 1213304, 1224251, 1221819, 1209753, 1218816, 1210867, 1222105, 1219215, 1215793, 1225205, 1218475, 1214252, 1213900, 1220664, 1208290, 1219011, 1226640, 1212089, 1214368, 1205373, 1216645, 1205567, 1205405, 1226441, 1224970, 1214750, 1220244, 121…	2095	237	6441	1.29724	0.993224	0.254566	2.60993
GOTERM_BP_ALL	GO:0050808~synapse organization	13	0.140541	0.00144559	1214011, 1210315, 1218451, 1224457, 1211535, 1225022, 1209914, 1227007, 1214690, 1205666, 1224969, 1221161, 1208641	2095	17	6441	2.35106	0.99324	0.242395	2.6111
GOTERM_BP_ALL	GO:0009790~embryonic development	105	1.13514	0.00153551	1219438, 1227684, 1225369, 1227404, 1208778, 1209925, 1208403, 1226947, 1222547, 1211448, 1206023, 1211960, 1218602, 1205822, 1216509, 1225423, 1226614, 1209117, 1207158, 1225430, 1210315, 1226939, 1209318, 1227361, 1216764, 1206113, 1218756, 1209041, 1225235, 1211357, 1225185, 1206447, 1219895, 1227137, 1226093, 1220230, 1216831, 1218670, 1213339, 1215905, 1215687, 1221161, 1220103, 1211915, 121…	2095	251	6441	1.28613	0.995047	0.243729	2.77138
GOTERM_BP_ALL	GO:0006468~protein amino acid phosphorylation	151	1.63243	0.00168446	1226848, 1220356, 1227404, 1209309, 1208062, 1209254, 1221503, 1217539, 1212195, 1220256, 1210576, 1224462, 1213258, 1222069, 1220808, 1219886, 1222444, 1217936, 1224755, 1222447, 1214700, 1215244, 1212066, 1225781, 1209044, 1227185, 1206113, 1226765, 1223629, 1223816, 1224857, 1225189, 1213444, 1206642, 1215608, 1225772, 1210753, 1224981, 1222627, 1211272, 1223253, 1214045, 1213234, 1218725, 122…	2095	379	6441	1.22492	0.997041	0.252598	3.0363
GOTERM_BP_ALL	GO:0055085~transmembrane transport	133	1.43784	0.00173328	1221412, 1215429, 1221188, 1218742, 1220255, 1213739, 1226750, 1213520, 1219535, 1220451, 1212309, 1206121, 1223425, 1220785, 1222541, 1209820, 1223230, 1211656, 1213115, 1221386, 1224560, 1207625, 1221212, 1208912, 1206441, 1217006, 1217205, 1207051, 1226560, 1209385, 1206192, 1221406, 1223434, 1226042, 1210588, 1225372, 1218899, 1224765, 1220779, 1225183, 1221066, 1227108, 1219616, 1212320, 120…	2095	329	6441	1.24287	0.997501	0.248235	3.12299
GOTERM_BP_ALL	GO:0007155~cell adhesion	108	1.16757	0.0017372	1225420, 1210849, 1227605, 1214950, 1218764, 1208403, 1211768, 1227011, 1220649, 1211552, 1225191, 1221116, 1224106, 1213442, 1208507, 1226939, 1209422, 1218083, 1206771, 1214305, 1225022, 1227007, 1220634, 1208478, 1212069, 1211832, 1223951, 1221399, 1224250, 1224709, 1210136, 1209080, 1206741, 1211535, 1226961, 1225072, 1224244, 1218888, 1215415, 1211915, 1225621, 1216694, 1213655, 1205469, 121…	2095	260	6441	1.27708	0.997535	0.23889	3.12995
GOTERM_BP_ALL	GO:0022610~biological adhesion	108	1.16757	0.0017372	1225420, 1210849, 1227605, 1214950, 1218764, 1208403, 1211768, 1227011, 1220649, 1211552, 1225191, 1221116, 1224106, 1213442, 1208507, 1226939, 1209422, 1218083, 1206771, 1214305, 1225022, 1227007, 1220634, 1208478, 1212069, 1211832, 1223951, 1221399, 1224250, 1224709, 1210136, 1209080, 1206741, 1211535, 1226961, 1225072, 1224244, 1218888, 1215415, 1211915, 1225621, 1216694, 1213655, 1205469, 121…	2095	260	6441	1.27708	0.997535	0.23889	3.12995
GOTERM_BP_ALL	GO:0051128~regulation of cellular component organization	56	0.605405	0.001839	1205695, 1219438, 1225369, 1220054, 1209925, 1216060, 1218451, 1206128, 1216440, 1217193, 1220648, 1210889, 1205959, 1225423, 1225097, 1212247, 1217764, 1221923, 1226358, 1212278, 1205428, 1222732, 1207407, 1221302, 1207873, 1206113, 1222988, 1227463, 1221399, 1227254, 1226198, 1214011, 1206642, 1227257, 1209275, 1206180, 1216831, 1222627, 1210517, 1209510, 1215440, 1215755, 1206601, 1227490, 122…	2095	121	6441	1.42289	0.998267	0.241509	3.31046
GOTERM_BP_ALL	GO:0016570~histone modification	22	0.237838	0.00196958	1220349, 1221053, 1220520, 1215550, 1214782, 1225963, 1213727, 1226302, 1217432, 1217589, 1220230, 1223228, 1214045, 1214816, 1219260, 1213353, 1206766, 1205574, 1214004, 1226983, 1214638, 1211150	2095	37	6441	1.82806	0.998897	0.247034	3.54155
GOTERM_BP_ALL	GO:0006325~chromatin organization	55	0.594595	0.00210896	1214782, 1210091, 1217589, 1219831, 1213353, 1206766, 1222403, 1218202, 1221748, 1226983, 1216119, 1224758, 1211150, 1220196, 1207703, 1220520, 1225584, 1221891, 1212278, 1205429, 1209621, 1214770, 1227364, 1213727, 1214967, 1223228, 1219260, 1214816, 1214004, 1213485, 1214638, 1221053, 1205362, 1225963, 1226302, 1220230, 1214045, 1206243, 1205574, 1220372, 1209698, 1208460, 1206974, 1220349, 122…	2095	119	6441	1.42097	0.999319	0.252993	3.78761
GOTERM_BP_ALL	GO:0043414~biopolymer methylation	15	0.162162	0.00263851	1220349, 1211774, 1212278, 1207473, 1209925, 1218977, 1207041, 1215161, 1214782, 1205405, 1207172, 1217432, 1222403, 1214004, 1213485	2095	22	6441	2.09622	0.999891	0.296002	4.71714
GOTERM_BP_ALL	GO:0032501~multicellular organismal process	373	4.03243	0.00265877	1225420, 1226848, 1227684, 1208300, 1227404, 1207146, 1208302, 1209925, 1226173, 1221503, 1208403, 1224469, 1215625, 1213629, 1226947, 1213520, 1223885, 1216757, 1224173, 1216506, 1218101, 1213258, 1220785, 1209820, 1220648, 1218499, 1206023, 1218602, 1213115, 1227190, 1205822, 1216509, 1224969, 1225423, 1227195, 1216202, 1224181, 1225430, 1207158, 1205190, 1226939, 1215380, 1218083, 1224454, 122…	2095	1024	6441	1.1199	0.999899	0.288641	4.75253
GOTERM_BP_ALL	GO:0006304~DNA modification	9	0.0972973	0.00282496	1209925, 1212278, 1207473, 1207041, 1222403, 1213485, 1207172, 1210386, 1217432	2095	10	6441	2.76702	0.999943	0.294587	5.04239
GOTERM_BP_ALL	GO:0007275~multicellular organismal development	304	3.28649	0.00285302	1225420, 1226848, 1227684, 1208300, 1227404, 1207146, 1208302, 1209925, 1208403, 1224469, 1226947, 1216757, 1224173, 1216506, 1218101, 1209820, 1220648, 1206023, 1218602, 1227190, 1205822, 1224969, 1216509, 1225423, 1216202, 1225430, 1207158, 1226939, 1215380, 1218083, 1224454, 1224457, 1221302, 1216764, 1225022, 1218756, 1209041, 1212686, 1206447, 1223951, 1225185, 1219895, 1224857, 1226198, 120…	2095	823	6441	1.13565	0.999948	0.288436	5.09125
GOTERM_BP_ALL	GO:0035023~regulation of Rho protein signal transduction	25	0.27027	0.00300117	1216993, 1211133, 1226272, 1224403, 1223234, 1208577, 1223097, 1214080, 1215464, 1218041, 1212385, 1214850, 1221235, 1226982, 1221367, 1209281, 1224023, 1209544, 1222111, 1226403, 1225661, 1218305, 1215744, 1217907, 1217790	2095	45	6441	1.70804	0.999969	0.292526	5.34882
GOTERM_BP_ALL	GO:0006796~phosphate metabolic process	201	2.17297	0.00307422	1226848, 1220356, 1217489, 1227404, 1221503, 1209254, 1208403, 1220256, 1210576, 1224462, 1213258, 1222069, 1211558, 1209820, 1219886, 1208912, 1215244, 1207051, 1225046, 1225045, 1209044, 1227185, 1206820, 1225189, 1224857, 1215608, 1226825, 1222691, 1224981, 1220230, 1210753, 1211272, 1218725, 1213234, 1222699, 1205701, 1207577, 1224440, 1211530, 1224302, 1217472, 1205075, 1210950, 1219734, 121…	2095	526	6441	1.17484	0.999976	0.290401	5.47558
GOTERM_BP_ALL	GO:0006793~phosphorus metabolic process	201	2.17297	0.00307422	1226848, 1220356, 1217489, 1227404, 1221503, 1209254, 1208403, 1220256, 1210576, 1224462, 1213258, 1222069, 1211558, 1209820, 1219886, 1208912, 1215244, 1207051, 1225046, 1225045, 1209044, 1227185, 1206820, 1225189, 1224857, 1215608, 1226825, 1222691, 1224981, 1220230, 1210753, 1211272, 1218725, 1213234, 1222699, 1205701, 1207577, 1224440, 1211530, 1224302, 1217472, 1205075, 1210950, 1219734, 121…	2095	526	6441	1.17484	0.999976	0.290401	5.47558
GOTERM_BP_ALL	GO:0034330~cell junction organization	11	0.118919	0.00325	1213442, 1225369, 1218382, 1223870, 1212318, 1205222, 1219509, 1219040, 1221399, 1225423, 1225097	2095	14	6441	2.41565	0.999987	0.296276	5.77994
GOTERM_BP_ALL	GO:0048856~anatomical structure development	256	2.76757	0.0032782	1225420, 1226848, 1227684, 1207146, 1208302, 1227404, 1209925, 1224469, 1226947, 1224173, 1216506, 1218101, 1211829, 1220648, 1209820, 1206023, 1218602, 1227190, 1205822, 1224969, 1216509, 1225423, 1216202, 1207158, 1226939, 1208914, 1218083, 1224454, 1224457, 1221302, 1216764, 1225022, 1218756, 1209041, 1212686, 1206447, 1223951, 1225185, 1224857, 1226198, 1206187, 1221438, 1218788, 1222691, 120…	2095	685	6441	1.149	0.999988	0.290846	5.82867
GOTERM_BP_ALL	GO:0006928~cell motion	61	0.659459	0.00342373	1205695, 1225420, 1227404, 1209309, 1214950, 1212195, 1227011, 1215464, 1218101, 1218602, 1225099, 1209012, 1210889, 1222472, 1205666, 1221546, 1220194, 1207158, 1207406, 1218083, 1209087, 1224454, 1221302, 1225022, 1215825, 1206113, 1215726, 1220634, 1206389, 1208641, 1226198, 1206642, 1224403, 1218336, 1219141, 1218788, 1206180, 1218725, 1215755, 1215687, 1221161, 1220103, 1210416, 1225072, 122…	2095	137	6441	1.36892	0.999993	0.294189	6.07983
GOTERM_BP_ALL	GO:0006811~ion transport	152	1.64324	0.00355956	1221412, 1215429, 1221188, 1226173, 1218742, 1220848, 1213520, 1206780, 1208175, 1220451, 1206121, 1223425, 1220785, 1213316, 1222541, 1209820, 1218499, 1211656, 1213115, 1224560, 1213633, 1208912, 1207051, 1209385, 1222732, 1222841, 1216762, 1206111, 1218899, 1224765, 1227108, 1205110, 1221066, 1205946, 1212320, 1224248, 1216633, 1221765, 1215309, 1224151, 1213856, 1224981, 1224906, 1215300, 120…	2095	388	6441	1.20443	0.999996	0.296653	6.31368
GOTERM_BP_ALL	GO:0050789~regulation of biological process	780	8.43243	0.00376327	1226848, 1227684, 1207147, 1227685, 1220054, 1227404, 1226171, 1214782, 1208825, 1213251, 1206954, 1214502, 1225982, 1218496, 1220648, 1206023, 1218494, 1214373, 1212281, 1211150, 1205190, 1207158, 1225584, 1212278, 1215380, 1208958, 1221309, 1221302, 1220634, 1220060, 1224857, 1226198, 1211133, 1221053, 1224191, 1226825, 1225963, 1218094, 1218092, 1218475, 1206930, 1207577, 1205574, 1225072, 121…	2095	2247	6441	1.06724	0.999998	0.303541	6.66335
GOTERM_BP_ALL	GO:0030001~metal ion transport	84	0.908108	0.00489369	1221412, 1227058, 1218450, 1217544, 1226173, 1208249, 1218742, 1220848, 1213520, 1218458, 1214407, 1226884, 1208175, 1225852, 1220096, 1220451, 1223425, 1220785, 1209015, 1211656, 1225463, 1213115, 1216795, 1224560, 1222732, 1221021, 1211879, 1206159, 1218468, 1222841, 1216762, 1220299, 1218899, 1211604, 1208640, 1222291, 1227207, 1221954, 1212320, 1224248, 1216633, 1221765, 1212622, 1215309, 121…	2095	201	6441	1.28485	1	0.367423	8.58145
GOTERM_BP_ALL	GO:0007399~nervous system development	114	1.23243	0.00495541	1225369, 1208302, 1208778, 1216060, 1209309, 1206128, 1226947, 1224173, 1216506, 1218101, 1222547, 1211448, 1220648, 1206023, 1211960, 1218602, 1223130, 1205822, 1224969, 1226614, 1224106, 1207158, 1210315, 1226939, 1209318, 1225781, 1218083, 1222732, 1224454, 1221302, 1210504, 1225022, 1215825, 1218756, 1209041, 1224857, 1227137, 1226198, 1206642, 1206187, 1221438, 1219141, 1218788, 1220230, 122…	2095	284	6441	1.23412	1	0.363353	8.6851
GOTERM_BP_ALL	GO:0048468~cell development	86	0.92973	0.00530674	1205695, 1225420, 1227404, 1216060, 1209309, 1218451, 1206128, 1212195, 1216506, 1208735, 1209914, 1220808, 1218602, 1211960, 1209012, 1224825, 1205666, 1205822, 1224969, 1225423, 1226614, 1215971, 1209117, 1207507, 1224106, 1207158, 1210315, 1226939, 1215380, 1218083, 1207406, 1221302, 1224310, 1210504, 1225942, 1214305, 1225022, 1215825, 1206113, 1215726, 1222988, 1227007, 1208478, 1206389, 122…	2095	207	6441	1.27731	1	0.375771	9.27298
GOTERM_BP_ALL	GO:0018212~peptidyl-tyrosine modification	18	0.194595	0.00534657	1208074, 1206642, 1211165, 1210796, 1221503, 1209087, 1212195, 1214986, 1222595, 1211272, 1225957, 1218900, 1220737, 1219040, 1219413, 1205960, 1206800, 1210929	2095	30	6441	1.84468	1	0.370554	9.33939
GOTERM_BP_ALL	GO:0018108~peptidyl-tyrosine phosphorylation	18	0.194595	0.00534657	1208074, 1206642, 1211165, 1210796, 1221503, 1209087, 1212195, 1214986, 1222595, 1211272, 1225957, 1218900, 1220737, 1219040, 1219413, 1205960, 1206800, 1210929	2095	30	6441	1.84468	1	0.370554	9.33939
GOTERM_BP_ALL	GO:0044238~primary metabolic process	891	9.63243	0.00547653	1226848, 1227404, 1224035, 1213255, 1221504, 1221503, 1214782, 1213251, 1214502, 1213258, 1206023, 1225053, 1205592, 1218490, 1211150, 1220830, 1207158, 1205190, 1225584, 1215380, 1212278, 1224044, 1225580, 1221309, 1214770, 1205196, 1227690, 1225046, 1225045, 1206014, 1205587, 1220060, 1208189, 1224857, 1221053, 1226195, 1226825, 1225963, 1218092, 1205165, 1213234, 1218478, 1218475, 1218473, 120…	2095	2593	6441	1.05644	1	0.370376	9.5558
GOTERM_BP_ALL	GO:0044237~cellular metabolic process	810	8.75676	0.00567379	1226848, 1227404, 1224035, 1221504, 1213255, 1221503, 1214782, 1214502, 1213258, 1206023, 1225053, 1205592, 1218490, 1211150, 1220830, 1205190, 1207158, 1225584, 1212278, 1215380, 1225580, 1221309, 1214770, 1227690, 1225046, 1225045, 1206014, 1220060, 1208189, 1205587, 1224857, 1221053, 1226195, 1226825, 1225963, 1218092, 1205165, 1213234, 1218478, 1218475, 1218473, 1206930, 1207577, 1205574, 122…	2095	2346	6441	1.06152	1	0.373703	9.88334
GOTERM_BP_ALL	GO:0046578~regulation of Ras protein signal transduction	47	0.508108	0.00627423	1225420, 1216993, 1211133, 1226272, 1224403, 1223234, 1208577, 1218935, 1213668, 1226438, 1219217, 1208011, 1223097, 1215464, 1222563, 1217733, 1214080, 1218041, 1212385, 1208381, 1214850, 1222349, 1221235, 1221161, 1218494, 1226982, 1221367, 1215244, 1209281, 1221778, 1224023, 1222111, 1209544, 1226403, 1225661, 1211813, 1218305, 1215744, 1222988, 1217418, 1209142, 1217907, 1209972, 1207268, 121…	2095	103	6441	1.40291	1	0.396838	10.8734
GOTERM_BP_ALL	GO:0065007~biological regulation	814	8.8	0.00633018	1226848, 1227684, 1207147, 1227685, 1220054, 1227404, 1226171, 1214782, 1208825, 1213251, 1206954, 1214502, 1225982, 1218496, 1220648, 1206023, 1218494, 1214373, 1212281, 1211150, 1205190, 1207158, 1225584, 1212278, 1215380, 1208958, 1221309, 1221302, 1220634, 1220060, 1224857, 1226198, 1211133, 1221053, 1224191, 1226825, 1225963, 1218094, 1218092, 1218475, 1218473, 1206930, 1207577, 1205574, 122…	2095	2359	6441	1.06088	1	0.392558	10.9652
GOTERM_BP_ALL	GO:0006305~DNA alkylation	8	0.0864865	0.00705701	1209925, 1212278, 1207473, 1207041, 1222403, 1213485, 1207172, 1217432	2095	9	6441	2.73286	1	0.419337	12.1488
GOTERM_BP_ALL	GO:0006338~chromatin remodeling	8	0.0864865	0.00705701	1214045, 1219190, 1219975, 1206243, 1227364, 1213485, 1210091, 1208460	2095	9	6441	2.73286	1	0.419337	12.1488
GOTERM_BP_ALL	GO:0006306~DNA methylation	8	0.0864865	0.00705701	1209925, 1212278, 1207473, 1207041, 1222403, 1213485, 1207172, 1217432	2095	9	6441	2.73286	1	0.419337	12.1488
GOTERM_BP_ALL	GO:0007165~signal transduction	285	3.08108	0.00714581	1226848, 1208300, 1208403, 1208577, 1226947, 1206954, 1220256, 1225982, 1218496, 1212385, 1209538, 1223429, 1211559, 1206436, 1227190, 1226556, 1205959, 1214373, 1218201, 1224181, 1208958, 1224189, 1217289, 1216765, 1225028, 1224453, 1205831, 1213106, 1211133, 1226825, 1221438, 1218788, 1218094, 1209558, 1211272, 1206690, 1205472, 1218725, 1224440, 1205313, 1211675, 1226536, 1218624, 1218611, 121…	2095	779	6441	1.1248	1	0.416367	12.2923
GOTERM_BP_ALL	GO:0048731~system development	236	2.55135	0.00715852	1225420, 1226848, 1227684, 1207146, 1208302, 1227404, 1209925, 1224469, 1226947, 1224173, 1216506, 1218101, 1220648, 1209820, 1206023, 1218602, 1227190, 1205822, 1224969, 1216509, 1225423, 1216202, 1207158, 1226939, 1218083, 1224454, 1224457, 1221302, 1225022, 1218756, 1209041, 1212686, 1206447, 1223951, 1225185, 1224857, 1226198, 1206187, 1221438, 1218788, 1222691, 1206180, 1220230, 1211535, 121…	2095	636	6441	1.14084	1	0.410197	12.3129
GOTERM_BP_ALL	GO:0031175~neuron projection development	34	0.367568	0.00729549	1226198, 1216060, 1209309, 1218336, 1205222, 1206128, 1218788, 1216506, 1211530, 1218602, 1215687, 1209012, 1205666, 1205822, 1224969, 1225072, 1210416, 1227490, 1207158, 1210315, 1213655, 1207899, 1218083, 1208414, 1221302, 1210504, 1226707, 1225022, 1215825, 1226024, 1215726, 1211521, 1212952, 1208641	2095	70	6441	1.49331	1	0.409565	12.5338
GOTERM_BP_ALL	GO:0007169~transmembrane receptor protein tyrosine kinase signaling pathway	42	0.454054	0.0079716	1214011, 1222475, 1209309, 1218451, 1208062, 1208268, 1214428, 1216440, 1217539, 1212195, 1220256, 1216831, 1210805, 1225957, 1219886, 1213587, 1222472, 1224302, 1227524, 1208074, 1220408, 1205075, 1210950, 1211165, 1225642, 1219734, 1225781, 1223353, 1208414, 1214986, 1207112, 1218138, 1226024, 1216661, 1218900, 1215705, 1214479, 1206800, 1210929, 1224857, 1225189, 1211062	2095	91	6441	1.41898	1	0.431167	13.617
GOTERM_BP_ALL	GO:0010628~positive regulation of gene expression	82	0.886486	0.00831543	1226848, 1227404, 1209925, 1225323, 1212195, 1210091, 1217589, 1220121, 1211448, 1209961, 1207399, 1209863, 1210889, 1209012, 1222503, 1219609, 1218417, 1205822, 1225423, 1225097, 1212156, 1226614, 1227314, 1210315, 1212278, 1212631, 1222732, 1211933, 1227000, 1225942, 1214816, 1227466, 1206926, 1219164, 1222988, 1207285, 1223526, 1227463, 1213574, 1217768, 1208641, 1227137, 1214011, 1224770, 120…	2095	199	6441	1.26686	1	0.438325	14.1629
GOTERM_BP_ALL	GO:0015674~di-, tri-valent inorganic cation transport	31	0.335135	0.00862796	1227207, 1221954, 1218450, 1208249, 1213520, 1205746, 1213856, 1219818, 1210102, 1220451, 1209015, 1220785, 1223425, 1220002, 1221828, 1205510, 1212415, 1227027, 1211855, 1205899, 1219674, 1222732, 1221021, 1219207, 1211879, 1206159, 1212098, 1218899, 1222414, 1214690, 1211604	2095	63	6441	1.51283	1	0.443934	14.6563
GOTERM_BP_ALL	GO:0034641~cellular nitrogen compound metabolic process	374	4.04324	0.0088173	1217488, 1217483, 1209925, 1224035, 1207041, 1209436, 1221504, 1214782, 1210391, 1227543, 1220158, 1217589, 1224173, 1214502, 1212382, 1218101, 1216752, 1209052, 1209820, 1224963, 1206023, 1218202, 1205592, 1218490, 1225423, 1227195, 1211150, 1225430, 1207158, 1205190, 1208912, 1225584, 1208583, 1212278, 1207051, 1215380, 1213635, 1224559, 1225580, 1221309, 1205429, 1214770, 1223897, 1217289, 121…	2095	1044	6441	1.10139	1	0.444713	14.9539
GOTERM_BP_ALL	GO:0001701~in utero embryonic development	36	0.389189	0.00911835	1226654, 1219438, 1227404, 1225466, 1226093, 1223700, 1219818, 1213339, 1211560, 1215755, 1222909, 1220194, 1216509, 1225097, 1227490, 1221725, 1209117, 1207507, 1215554, 1225430, 1207703, 1226263, 1219190, 1227361, 1207406, 1227630, 1225942, 1206926, 1206113, 1207223, 1218756, 1205711, 1225068, 1216887, 1211623, 1211357	2095	76	6441	1.45632	1	0.449521	15.4251
GOTERM_BP_ALL	GO:0006807~nitrogen compound metabolic process	384	4.15135	0.010502	1217488, 1217483, 1209925, 1224035, 1207041, 1209436, 1221504, 1214782, 1210391, 1227543, 1220158, 1217589, 1224173, 1217393, 1214502, 1212382, 1218101, 1216752, 1209052, 1209820, 1224963, 1206023, 1218202, 1205592, 1218490, 1220459, 1225423, 1227195, 1211150, 1225430, 1207158, 1205190, 1208912, 1225584, 1208583, 1212278, 1215380, 1207051, 1213635, 1224559, 1225580, 1221309, 1205429, 1214770, 122…	2095	1076	6441	1.09721	1	0.490993	17.5593
GOTERM_BP_ALL	GO:0010646~regulation of cell communication	127	1.37297	0.0107023	1225420, 1227684, 1225369, 1207147, 1227404, 1223234, 1208577, 1217539, 1212195, 1218935, 1210091, 1217733, 1212385, 1206023, 1209195, 1208381, 1214850, 1218494, 1224969, 1222447, 1225423, 1226614, 1215971, 1214700, 1210315, 1215244, 1225781, 1211779, 1222111, 1222732, 1221302, 1214240, 1217181, 1225185, 1217790, 1223115, 1211133, 1211783, 1221438, 1214461, 1209558, 1226438, 1219217, 1222563, 121…	2095	327	6441	1.19406	1	0.491213	17.8638
GOTERM_BP_ALL	GO:0040029~regulation of gene expression, epigenetic	16	0.172973	0.0110992	1219445, 1209753, 1226460, 1212278, 1207473, 1209925, 1207041, 1214782, 1217603, 1226441, 1207172, 1217432, 1222403, 1213485, 1219895, 1209698	2095	27	6441	1.8219	1	0.497626	18.4645
GOTERM_BP_ALL	GO:0006396~RNA processing	59	0.637838	0.0132388	1214543, 1218977, 1209436, 1224690, 1215161, 1224994, 1206166, 1216358, 1220158, 1213830, 1209347, 1218490, 1213493, 1227195, 1205995, 1226460, 1216822, 1217721, 1225689, 1212832, 1220161, 1219994, 1205486, 1224251, 1208641, 1221819, 1226475, 1218816, 1210867, 1208900, 1219215, 1224349, 1220145, 1225205, 1215755, 1214252, 1224677, 1208195, 1208290, 1219011, 1226640, 1219445, 1214368, 1210383, 120…	2095	139	6441	1.30499	1	0.554064	21.6312
GOTERM_BP_ALL	GO:0050794~regulation of cellular process	741	8.01081	0.0132892	1226848, 1227684, 1207147, 1227685, 1220054, 1227404, 1207041, 1214782, 1213251, 1208825, 1226947, 1206954, 1224173, 1214502, 1225982, 1218496, 1212385, 1220648, 1224963, 1206023, 1213115, 1219886, 1219609, 1218494, 1224969, 1214373, 1212281, 1211150, 1224181, 1205190, 1207158, 1215244, 1219610, 1215243, 1225584, 1215380, 1212278, 1221309, 1208958, 1224189, 1227550, 1221302, 1214240, 1218756, 122…	2095	2154	6441	1.05765	1	0.549186	21.7045
GOTERM_BP_ALL	GO:0000902~cell morphogenesis	44	0.475676	0.0142086	1226848, 1226198, 1221355, 1216060, 1209309, 1206187, 1205222, 1218336, 1217539, 1218788, 1211560, 1211530, 1211960, 1218602, 1215687, 1209012, 1205666, 1205822, 1221161, 1225072, 1210416, 1227490, 1226614, 1207158, 1226939, 1213655, 1219509, 1207899, 1218083, 1208414, 1221302, 1226707, 1225022, 1226024, 1215825, 1206113, 1207223, 1215726, 1223870, 1225068, 1205929, 1205771, 1212952, 1208641	2095	99	6441	1.36643	1	0.567326	23.028
GOTERM_BP_ALL	GO:0007167~enzyme linked receptor protein signaling pathway	57	0.616216	0.0142412	1222475, 1227404, 1209309, 1225323, 1218451, 1208062, 1216440, 1212195, 1217539, 1206954, 1220256, 1210805, 1225957, 1219886, 1222472, 1227302, 1225423, 1225642, 1225781, 1207112, 1218138, 1216661, 1213873, 1218756, 1206113, 1218900, 1214479, 1224857, 1225189, 1210929, 1214011, 1210796, 1208268, 1214428, 1216831, 1214974, 1213992, 1213587, 1224302, 1210416, 1227524, 1208074, 1205075, 1220408, 121…	2095	134	6441	1.30779	1	0.562076	23.0745
GOTERM_BP_ALL	GO:0007049~cell cycle	62	0.67027	0.0151146	1219438, 1227404, 1208673, 1227113, 1210391, 1224469, 1219848, 1222225, 1224462, 1216451, 1218501, 1227193, 1225423, 1220604, 1215380, 1207630, 1208958, 1220828, 1216668, 1227364, 1207406, 1224454, 1221302, 1206962, 1206589, 1215103, 1223526, 1217186, 1214004, 1224048, 1219895, 1220060, 1208641, 1220373, 1210828, 1227357, 1226093, 1205543, 1219818, 1224981, 1224019, 1213234, 1225305, 1213339, 121…	2095	148	6441	1.28795	1	0.57784	24.3117
GOTERM_BP_ALL	GO:0016310~phosphorylation	166	1.79459	0.0163749	1226848, 1220356, 1227404, 1209309, 1208062, 1209254, 1221503, 1208403, 1212195, 1217539, 1220256, 1210576, 1224462, 1213258, 1222069, 1220808, 1211558, 1209820, 1219886, 1222444, 1217936, 1224755, 1222447, 1214700, 1208912, 1215244, 1207051, 1212066, 1225781, 1225045, 1209044, 1227185, 1206113, 1226765, 1223629, 1223816, 1207346, 1224857, 1225189, 1213444, 1206642, 1215608, 1226825, 1225772, 121…	2095	443	6441	1.15206	1	0.601398	26.0635
GOTERM_BP_ALL	GO:0000904~cell morphogenesis involved in differentiation	35	0.378378	0.0167735	1226198, 1216060, 1209309, 1218336, 1205222, 1218788, 1211530, 1211960, 1218602, 1215687, 1209012, 1205666, 1205822, 1225072, 1210416, 1227490, 1226614, 1207158, 1226939, 1213655, 1219509, 1207899, 1218083, 1208414, 1221302, 1226707, 1225022, 1215825, 1226024, 1206113, 1215726, 1225068, 1205929, 1212952, 1208641	2095	76	6441	1.41587	1	0.604424	26.6096
GOTERM_BP_ALL	GO:0030031~cell projection assembly	16	0.172973	0.0168352	1213442, 1226939, 1220408, 1206187, 1227257, 1224403, 1227011, 1210504, 1215464, 1207223, 1218382, 1223870, 1210889, 1219040, 1213070, 1227490	2095	28	6441	1.75684	1	0.600009	26.6939
GOTERM_BP_ALL	GO:0045941~positive regulation of transcription	78	0.843243	0.0170165	1226848, 1227404, 1209925, 1225323, 1210091, 1217589, 1220121, 1211448, 1209961, 1207399, 1209863, 1209012, 1222503, 1219609, 1218417, 1205822, 1225423, 1225097, 1212156, 1226614, 1227314, 1210315, 1212631, 1222732, 1211933, 1227000, 1225942, 1214816, 1227466, 1206926, 1219164, 1222988, 1207285, 1223526, 1227463, 1213574, 1217768, 1208641, 1227137, 1214011, 1224770, 1208082, 1217891, 1212364, 122…	2095	193	6441	1.24253	1	0.598286	26.9407
GOTERM_BP_ALL	GO:0007409~axonogenesis	28	0.302703	0.0175021	1226198, 1216060, 1209309, 1218336, 1205222, 1218788, 1211530, 1218602, 1209012, 1215687, 1205666, 1205822, 1225072, 1227490, 1210416, 1207158, 1213655, 1207899, 1218083, 1208414, 1221302, 1226707, 1215825, 1226024, 1225022, 1215726, 1212952, 1208641	2095	58	6441	1.48422	1	0.603092	27.5979
GOTERM_BP_ALL	GO:0032990~cell part morphogenesis	33	0.356757	0.0176888	1226198, 1216060, 1209309, 1206187, 1218336, 1205222, 1218788, 1211829, 1211530, 1218602, 1209012, 1215687, 1205666, 1205822, 1225072, 1210416, 1227490, 1207158, 1226939, 1208914, 1213655, 1207899, 1218083, 1208414, 1221302, 1226707, 1225022, 1215825, 1226024, 1207223, 1215726, 1212952, 1208641	2095	71	6441	1.42898	1	0.601505	27.8492
GOTERM_BP_ALL	GO:0045935~positive regulation of nucleobase, nucleoside, nucleotide and nucleic acid metabolic process	86	0.92973	0.0185088	1226848, 1219438, 1227404, 1209925, 1225323, 1216440, 1210091, 1217589, 1220121, 1211448, 1209961, 1207399, 1209863, 1209012, 1222503, 1219609, 1218417, 1205822, 1225423, 1225097, 1212156, 1226614, 1210357, 1227314, 1210315, 1212631, 1222732, 1211933, 1227000, 1225942, 1214816, 1227466, 1206926, 1219164, 1222988, 1207285, 1223526, 1227463, 1213574, 1217768, 1208641, 1227137, 1214011, 1224770, 120…	2095	216	6441	1.22409	1	0.612851	28.9427
GOTERM_BP_ALL	GO:0048858~cell projection morphogenesis	31	0.335135	0.0185931	1226198, 1216060, 1206187, 1209309, 1218336, 1205222, 1218788, 1211530, 1218602, 1209012, 1215687, 1205666, 1205822, 1225072, 1210416, 1227490, 1207158, 1226939, 1213655, 1207899, 1218083, 1208414, 1221302, 1226707, 1225022, 1215825, 1226024, 1215726, 1207223, 1212952, 1208641	2095	66	6441	1.44407	1	0.609174	29.0543
GOTERM_BP_ALL	GO:0045893~positive regulation of transcription, DNA-dependent	65	0.702703	0.0197262	1226848, 1209925, 1225323, 1210091, 1217589, 1220121, 1211448, 1209961, 1207399, 1209863, 1209012, 1222503, 1218417, 1219609, 1205822, 1225423, 1225097, 1226614, 1227314, 1210315, 1212631, 1222732, 1211933, 1227000, 1225942, 1227466, 1206926, 1214816, 1219164, 1222988, 1207285, 1213574, 1208641, 1227137, 1214011, 1224770, 1208082, 1217891, 1212364, 1218092, 1214808, 1221660, 1218475, 1211530, 120…	2095	158	6441	1.26481	1	0.625841	30.5376
GOTERM_BP_ALL	GO:0043062~extracellular structure organization	27	0.291892	0.020269	1211030, 1210847, 1214011, 1218451, 1211381, 1211535, 1226051, 1209914, 1205666, 1214015, 1224969, 1221161, 1227490, 1216718, 1208093, 1211915, 1210315, 1219509, 1224457, 1224299, 1225022, 1205336, 1227007, 1219360, 1216489, 1214690, 1208641	2095	56	6441	1.48233	1	0.63071	31.2376
GOTERM_BP_ALL	GO:0009966~regulation of signal transduction	114	1.23243	0.0203145	1225420, 1227684, 1225369, 1207147, 1227404, 1223234, 1217539, 1212195, 1208577, 1218935, 1217733, 1212385, 1206023, 1209195, 1208381, 1214850, 1218494, 1222447, 1225423, 1226614, 1215971, 1214700, 1215244, 1225781, 1211779, 1222111, 1221302, 1217181, 1225185, 1217790, 1223115, 1211133, 1211783, 1221438, 1214461, 1226438, 1219217, 1222563, 1218725, 1226536, 1221235, 1221161, 1221367, 1213702, 122…	2095	296	6441	1.18408	1	0.626399	31.296
GOTERM_BP_ALL	GO:0051179~localization	425	4.59459	0.0203261	1221412, 1227404, 1224035, 1226173, 1221504, 1220848, 1220844, 1222061, 1212382, 1208175, 1225058, 1220785, 1221115, 1218499, 1213115, 1221212, 1208912, 1226937, 1212278, 1207051, 1220167, 1206192, 1221406, 1221302, 1226042, 1220634, 1218899, 1220779, 1221066, 1225183, 1224857, 1219616, 1215370, 1206187, 1225575, 1221438, 1206183, 1224151, 1218788, 1206180, 1224981, 1214259, 1224157, 1211700, 121…	2095	1210	6441	1.07987	1	0.621537	31.3109
GOTERM_BP_ALL	GO:0048609~reproductive process in a multicellular organism	41	0.443243	0.0210364	1225420, 1210654, 1227404, 1208778, 1206187, 1218811, 1208082, 1221438, 1212170, 1224469, 1212195, 1218788, 1219848, 1220727, 1213339, 1213992, 1213258, 1220808, 1211530, 1220194, 1210416, 1225097, 1227195, 1209117, 1213702, 1215554, 1214368, 1215380, 1211165, 1207406, 1227576, 1222732, 1221445, 1217432, 1224310, 1225049, 1219048, 1205929, 1208478, 1215982, 1206389	2095	93	6441	1.35541	1	0.629301	32.2161
GOTERM_BP_ALL	GO:0032504~multicellular organism reproduction	41	0.443243	0.0210364	1225420, 1210654, 1227404, 1208778, 1206187, 1218811, 1208082, 1221438, 1212170, 1224469, 1212195, 1218788, 1219848, 1220727, 1213339, 1213992, 1213258, 1220808, 1211530, 1220194, 1210416, 1225097, 1227195, 1209117, 1213702, 1215554, 1214368, 1215380, 1211165, 1207406, 1227576, 1222732, 1221445, 1217432, 1224310, 1225049, 1219048, 1205929, 1208478, 1215982, 1206389	2095	93	6441	1.35541	1	0.629301	32.2161
GOTERM_BP_ALL	GO:0033554~cellular response to stress	67	0.724324	0.0210972	1226848, 1219438, 1214582, 1221934, 1225323, 1226171, 1210391, 1227543, 1219934, 1222547, 1209052, 1219609, 1227190, 1224757, 1210357, 1226974, 1210315, 1225584, 1220293, 1207406, 1216573, 1214967, 1225942, 1209044, 1209930, 1217768, 1225475, 1220060, 1219895, 1227517, 1223586, 1214282, 1226205, 1218811, 1226093, 1208557, 1220230, 1213998, 1208900, 1217424, 1218785, 1224019, 1226960, 1214045, 121…	2095	164	6441	1.25603	1	0.625436	32.2931
GOTERM_BP_ALL	GO:0048667~cell morphogenesis involved in neuron differentiation	30	0.324324	0.021445	1226198, 1216060, 1209309, 1218336, 1205222, 1218788, 1211530, 1211960, 1218602, 1209012, 1215687, 1205666, 1205822, 1225072, 1210416, 1227490, 1207158, 1226939, 1213655, 1207899, 1218083, 1208414, 1221302, 1226707, 1215825, 1226024, 1225022, 1215726, 1212952, 1208641	2095	64	6441	1.44115	1	0.626643	32.7316
GOTERM_BP_ALL	GO:0022613~ribonucleoprotein complex biogenesis	23	0.248649	0.0214931	1219011, 1219445, 1214368, 1205373, 1205405, 1224970, 1214750, 1217432, 1220145, 1209347, 1215755, 1207577, 1207399, 1225720, 1211220, 1211790, 1206231, 1216985, 1205563, 1205486, 1215200, 1208195, 1208290	2095	46	6441	1.53723	1	0.622668	32.7921
GOTERM_BP_ALL	GO:0048869~cellular developmental process	178	1.92432	0.0215845	1225420, 1226848, 1225369, 1208778, 1227404, 1216060, 1209309, 1206128, 1212195, 1217539, 1224173, 1216506, 1213043, 1218101, 1211829, 1222547, 1211448, 1220808, 1220648, 1206023, 1218602, 1211960, 1208381, 1223130, 1205822, 1224969, 1225423, 1215971, 1226614, 1209117, 1224106, 1207158, 1210315, 1208914, 1226939, 1215380, 1226358, 1222732, 1218083, 1224454, 1221302, 1210504, 1212974, 1214305, 121…	2095	481	6441	1.13774	1	0.619501	32.9068
GOTERM_BP_ALL	GO:0042472~inner ear morphogenesis	19	0.205405	0.0216675	1208093, 1207158, 1210315, 1211915, 1207703, 1226939, 1208778, 1209318, 1226947, 1220230, 1212002, 1216831, 1209230, 1224299, 1216841, 1211960, 1215905, 1207657, 1225185	2095	36	6441	1.62263	1	0.616244	33.0108
GOTERM_BP_ALL	GO:0032989~cellular component morphogenesis	49	0.52973	0.0226261	1226848, 1221355, 1209309, 1216060, 1217539, 1211829, 1208735, 1218602, 1211960, 1209012, 1205822, 1205666, 1226614, 1207158, 1208914, 1226939, 1218083, 1221302, 1214305, 1215825, 1225022, 1215726, 1206113, 1205771, 1208641, 1226198, 1206187, 1205222, 1218336, 1218788, 1213999, 1211560, 1211530, 1215687, 1221161, 1227490, 1225072, 1210416, 1213655, 1219509, 1207899, 1208414, 1226024, 1226707, 120…	2095	115	6441	1.30999	1	0.627718	34.2012
GOTERM_BP_ALL	GO:0043543~protein amino acid acylation	11	0.118919	0.0226913	1221053, 1220520, 1214816, 1219260, 1206766, 1205574, 1225963, 1211755, 1214638, 1226983, 1211150	2095	17	6441	1.98936	1	0.62422	34.2815
GOTERM_BP_ALL	GO:0007276~gamete generation	31	0.335135	0.0234378	1225420, 1210654, 1227404, 1206187, 1218811, 1208082, 1212170, 1212195, 1218788, 1219848, 1220727, 1213339, 1213992, 1213258, 1220808, 1220194, 1227195, 1210416, 1213702, 1209117, 1214368, 1215380, 1207406, 1221445, 1217432, 1225049, 1224310, 1219048, 1205929, 1208478, 1206389	2095	67	6441	1.42251	1	0.631752	35.1935
GOTERM_BP_ALL	GO:0009893~positive regulation of metabolic process	111	1.2	0.02389	1226848, 1225420, 1219438, 1227404, 1209925, 1212195, 1210091, 1217589, 1211448, 1217193, 1227190, 1218417, 1219609, 1205822, 1225423, 1226614, 1210315, 1212278, 1208958, 1222732, 1221302, 1227000, 1223526, 1209041, 1219895, 1227137, 1224770, 1211783, 1221438, 1208557, 1209275, 1220230, 1224981, 1218092, 1216831, 1218725, 1218475, 1205604, 1211530, 1205574, 1225177, 1226632, 1212089, 1219484, 121…	2095	289	6441	1.18085	1	0.634407	35.7401
GOTERM_BP_ALL	GO:0007242~intracellular signaling cascade	142	1.53514	0.0239944	1226848, 1208300, 1216818, 1216060, 1208403, 1217539, 1212195, 1208577, 1220256, 1221485, 1225982, 1212385, 1220808, 1223429, 1208381, 1211559, 1206436, 1214850, 1227190, 1205959, 1226556, 1214373, 1224262, 1208383, 1214700, 1210315, 1224761, 1225781, 1211779, 1223225, 1222111, 1225028, 1210504, 1212974, 1213054, 1224453, 1226765, 1227009, 1207346, 1205831, 1213106, 1206385, 1211133, 1226825, 122…	2095	378	6441	1.15496	1	0.631626	35.8657
GOTERM_BP_ALL	GO:0032259~methylation	16	0.172973	0.0245883	1220349, 1211774, 1212278, 1207473, 1209925, 1218977, 1207041, 1215161, 1224994, 1214782, 1205405, 1207172, 1217432, 1222403, 1214004, 1213485	2095	29	6441	1.69626	1	0.636378	36.5757
GOTERM_BP_ALL	GO:0051716~cellular response to stimulus	88	0.951351	0.0246838	1226848, 1219438, 1214582, 1221934, 1213290, 1225323, 1226171, 1210391, 1216440, 1227543, 1227011, 1219934, 1227509, 1222547, 1209052, 1210889, 1227190, 1219609, 1224757, 1210357, 1224181, 1226974, 1210315, 1226460, 1225584, 1224610, 1220293, 1207406, 1211933, 1216573, 1214967, 1220525, 1225942, 1208748, 1209044, 1218900, 1220634, 1209930, 1217768, 1225475, 1219895, 1220060, 1227517, 1223586, 121…	2095	224	6441	1.20782	1	0.633519	36.6891
GOTERM_BP_ALL	GO:0048839~inner ear development	22	0.237838	0.0250178	1208093, 1207158, 1210315, 1211915, 1207703, 1226939, 1208778, 1209318, 1221445, 1226947, 1212002, 1220230, 1216831, 1224325, 1209230, 1224299, 1216841, 1211960, 1215905, 1207657, 1225185, 1208858	2095	44	6441	1.53723	1	0.634274	37.0845
GOTERM_BP_ALL	GO:0007411~axon guidance	20	0.216216	0.0253937	1226198, 1207158, 1209309, 1218336, 1207899, 1218083, 1218788, 1208414, 1225022, 1215825, 1226024, 1215726, 1218602, 1215687, 1209012, 1205666, 1225072, 1210416, 1227490, 1208641	2095	39	6441	1.57665	1	0.635627	37.5267
GOTERM_BP_ALL	GO:0048666~neuron development	41	0.443243	0.0254	1226198, 1216060, 1209309, 1205222, 1218336, 1206128, 1218788, 1216506, 1211530, 1211960, 1218602, 1215687, 1209012, 1224825, 1205822, 1205666, 1224969, 1225072, 1210416, 1227490, 1207507, 1224106, 1207158, 1210315, 1226939, 1213655, 1207899, 1218083, 1208414, 1221302, 1210504, 1226707, 1225022, 1226024, 1215825, 1215726, 1211521, 1224857, 1212952, 1220654, 1208641	2095	94	6441	1.34099	1	0.631562	37.5341
GOTERM_BP_ALL	GO:0006473~protein amino acid acetylation	10	0.108108	0.0260244	1221053, 1220520, 1214816, 1219260, 1206766, 1205574, 1225963, 1214638, 1226983, 1211150	2095	15	6441	2.04964	1	0.636503	38.262
GOTERM_BP_ALL	GO:0050885~neuromuscular process controlling balance	10	0.108108	0.0260244	1226939, 1208778, 1219360, 1225974, 1226093, 1226328, 1227490, 1210504, 1208900, 1208641	2095	15	6441	2.04964	1	0.636503	38.262
GOTERM_BP_ALL	GO:0016573~histone acetylation	10	0.108108	0.0260244	1221053, 1220520, 1214816, 1219260, 1206766, 1205574, 1225963, 1214638, 1226983, 1211150	2095	15	6441	2.04964	1	0.636503	38.262
GOTERM_BP_ALL	GO:0051254~positive regulation of RNA metabolic process	65	0.702703	0.0262173	1226848, 1209925, 1225323, 1210091, 1217589, 1220121, 1211448, 1209961, 1207399, 1209863, 1209012, 1222503, 1218417, 1219609, 1205822, 1225423, 1225097, 1226614, 1227314, 1210315, 1212631, 1222732, 1211933, 1227000, 1225942, 1227466, 1206926, 1214816, 1219164, 1222988, 1207285, 1213574, 1208641, 1227137, 1214011, 1224770, 1208082, 1217891, 1212364, 1218092, 1214808, 1221660, 1218475, 1211530, 120…	2095	160	6441	1.249	1	0.635191	38.4853
GOTERM_BP_ALL	GO:0051173~positive regulation of nitrogen compound metabolic process	87	0.940541	0.027176	1226848, 1219438, 1227404, 1209925, 1225323, 1216440, 1210091, 1217589, 1220121, 1211448, 1209961, 1207399, 1209863, 1209012, 1222503, 1219609, 1218417, 1205822, 1225423, 1225097, 1212156, 1226614, 1210357, 1227314, 1210315, 1212631, 1222732, 1211933, 1227000, 1225942, 1214816, 1227466, 1206926, 1219164, 1222988, 1207285, 1223526, 1227463, 1213574, 1217768, 1208641, 1227137, 1214011, 1224770, 120…	2095	222	6441	1.20486	1	0.644561	39.5835
GOTERM_BP_ALL	GO:0048699~generation of neurons	67	0.724324	0.0278012	1205695, 1216060, 1209309, 1206128, 1216506, 1224325, 1218101, 1211448, 1220648, 1206023, 1218602, 1211960, 1224825, 1209012, 1205822, 1205666, 1221546, 1224969, 1207507, 1224106, 1207158, 1210315, 1226939, 1222732, 1218083, 1221445, 1224454, 1221302, 1210504, 1225022, 1215825, 1215726, 1227463, 1224857, 1208641, 1227137, 1226198, 1206642, 1205222, 1218336, 1224289, 1219141, 1218788, 1220230, 122…	2095	166	6441	1.2409	1	0.649066	40.2898
GOTERM_BP_ALL	GO:0048812~neuron projection morphogenesis	28	0.302703	0.0285346	1226198, 1216060, 1209309, 1218336, 1205222, 1218788, 1211530, 1218602, 1209012, 1215687, 1205666, 1205822, 1225072, 1227490, 1210416, 1207158, 1213655, 1207899, 1218083, 1208414, 1221302, 1226707, 1215825, 1226024, 1225022, 1215726, 1212952, 1208641	2095	60	6441	1.43475	1	0.654839	41.1081
GOTERM_BP_ALL	GO:0034660~ncRNA metabolic process	37	0.4	0.0292687	1218816, 1218977, 1224994, 1222105, 1220158, 1213830, 1208900, 1220145, 1219215, 1207109, 1215755, 1224824, 1218490, 1218392, 1214741, 1220664, 1208195, 1205995, 1208290, 1219011, 1226460, 1227281, 1215380, 1216101, 1217456, 1205405, 1226441, 1216720, 1224970, 1214750, 1225689, 1211220, 1206231, 1211790, 1205563, 1205486, 1205038	2095	84	6441	1.35423	1	0.660416	41.9168
GOTERM_BP_ALL	GO:0007600~sensory perception	37	0.4	0.0292687	1206642, 1207000, 1206187, 1211844, 1226173, 1226328, 1214113, 1206741, 1205746, 1210882, 1209820, 1211960, 1218624, 1209672, 1213184, 1221828, 1214700, 1224181, 1208093, 1210315, 1207703, 1226939, 1212415, 1224610, 1225974, 1209089, 1222732, 1213167, 1220525, 1225942, 1227657, 1224765, 1225185, 1221870, 1222296, 1226702, 1220654	2095	84	6441	1.35423	1	0.660416	41.9168
GOTERM_BP_ALL	GO:0042471~ear morphogenesis	19	0.205405	0.0296537	1208093, 1207158, 1210315, 1211915, 1207703, 1226939, 1208778, 1209318, 1226947, 1220230, 1212002, 1216831, 1209230, 1224299, 1216841, 1211960, 1215905, 1207657, 1225185	2095	37	6441	1.57878	1	0.661441	42.3367
GOTERM_BP_ALL	GO:0030163~protein catabolic process	60	0.648649	0.02969	1226654, 1224722, 1220686, 1225466, 1227232, 1214582, 1220317, 1205694, 1213625, 1213005, 1225793, 1210672, 1212604, 1225513, 1218935, 1227479, 1217310, 1221740, 1209052, 1217255, 1225053, 1224968, 1214823, 1214928, 1221803, 1211736, 1206347, 1219468, 1227690, 1211938, 1213530, 1208378, 1205636, 1209767, 1220373, 1209371, 1226203, 1206180, 1218855, 1212823, 1215758, 1206319, 1222909, 1208655, 121…	2095	147	6441	1.25488	1	0.658095	42.3761
GOTERM_BP_ALL	GO:0006259~DNA metabolic process	86	0.92973	0.0298972	1219438, 1211212, 1214582, 1209925, 1207041, 1221934, 1210391, 1224790, 1227543, 1219934, 1209916, 1222547, 1209052, 1222403, 1205918, 1216451, 1220741, 1227195, 1211150, 1224757, 1210357, 1227300, 1226974, 1225584, 1212278, 1217526, 1220293, 1214770, 1227364, 1207406, 1223897, 1216573, 1216768, 1214967, 1223958, 1221655, 1209044, 1226809, 1209930, 1217768, 1213485, 1222987, 1219895, 1220060, 122…	2095	220	6441	1.20184	1	0.656922	42.6007
GOTERM_BP_ALL	GO:0034470~ncRNA processing	26	0.281081	0.0300727	1218816, 1218977, 1224994, 1220158, 1213830, 1208900, 1220145, 1219215, 1215755, 1218490, 1208195, 1205995, 1208290, 1219011, 1219445, 1226460, 1205405, 1226441, 1224970, 1214750, 1225689, 1211220, 1211790, 1206231, 1205563, 1205486	2095	55	6441	1.45338	1	0.655377	42.7904
GOTERM_BP_ALL	GO:0030154~cell differentiation	171	1.84865	0.0306281	1225420, 1226848, 1225369, 1208778, 1227404, 1216060, 1209309, 1206128, 1212195, 1224173, 1216506, 1213043, 1218101, 1222547, 1211448, 1220808, 1220648, 1206023, 1218602, 1211960, 1208381, 1223130, 1205822, 1224969, 1225423, 1215971, 1226614, 1209117, 1224106, 1207158, 1210315, 1226939, 1215380, 1226358, 1222732, 1218083, 1224454, 1221302, 1210504, 1212974, 1214305, 1215825, 1225022, 1206113, 122…	2095	465	6441	1.13061	1	0.658509	43.3865
GOTERM_BP_ALL	GO:0007346~regulation of mitotic cell cycle	18	0.194595	0.0346655	1207158, 1221923, 1205428, 1226093, 1208255, 1216440, 1214986, 1211267, 1216831, 1209510, 1213339, 1215440, 1222988, 1223870, 1213353, 1215755, 1225423, 1208641	2095	35	6441	1.58115	1	0.700766	47.5473
GOTERM_BP_ALL	GO:0006281~DNA repair	44	0.475676	0.0351118	1223586, 1214282, 1226205, 1218811, 1221934, 1226093, 1210391, 1227543, 1220230, 1217424, 1218785, 1224019, 1226960, 1219934, 1213339, 1222547, 1209052, 1217711, 1221471, 1220003, 1205645, 1219769, 1224757, 1210357, 1226974, 1212089, 1225584, 1213801, 1226484, 1217649, 1216645, 1220293, 1207406, 1214988, 1216573, 1211267, 1214967, 1216075, 1209044, 1226448, 1217768, 1209930, 1220060, 1219895	2095	104	6441	1.30073	1	0.701909	47.989
GOTERM_BP_ALL	GO:0043583~ear development	23	0.248649	0.0365831	1208093, 1207158, 1210315, 1211915, 1207703, 1226939, 1208778, 1209318, 1221445, 1226947, 1212002, 1220230, 1216831, 1224325, 1209230, 1224299, 1216841, 1211960, 1215905, 1207657, 1225185, 1208858, 1210929	2095	48	6441	1.47318	1	0.713432	49.4205
GOTERM_BP_ALL	GO:0007528~neuromuscular junction development	7	0.0756757	0.0374759	1214011, 1209914, 1227007, 1218451, 1214690, 1224969, 1208641	2095	9	6441	2.39125	1	0.718762	50.2709
GOTERM_BP_ALL	GO:0010608~posttranscriptional regulation of gene expression	21	0.227027	0.0382443	1219445, 1209753, 1221253, 1227685, 1226460, 1215380, 1208557, 1226441, 1218943, 1213681, 1220727, 1209916, 1210246, 1226785, 1207577, 1213900, 1226800, 1222716, 1211679, 1212247, 1208641	2095	43	6441	1.50148	1	0.722724	50.992
GOTERM_BP_ALL	GO:0010604~positive regulation of macromolecule metabolic process	104	1.12432	0.0395785	1226848, 1225420, 1219438, 1227404, 1209925, 1212195, 1210091, 1217589, 1211448, 1217193, 1227190, 1218417, 1219609, 1205822, 1225423, 1226614, 1210315, 1212278, 1208958, 1222732, 1221302, 1227000, 1223526, 1209041, 1219895, 1227137, 1224770, 1211783, 1208557, 1220230, 1224981, 1218092, 1216831, 1218725, 1218475, 1205604, 1211530, 1205574, 1225177, 1226632, 1212089, 1218875, 1213984, 1207172, 121…	2095	274	6441	1.16695	1	0.731761	52.2207
GOTERM_BP_ALL	GO:0045216~cell-cell junction organization	6	0.0648649	0.0406151	1213442, 1225369, 1223870, 1205222, 1225423, 1225097	2095	7	6441	2.63525	1	0.737745	53.1551
GOTERM_BP_ALL	GO:0008152~metabolic process	1063	11.4919	0.0406208	1226848, 1227404, 1224035, 1213255, 1221504, 1221503, 1214782, 1213251, 1214502, 1213258, 1225053, 1206023, 1205592, 1221119, 1218490, 1211150, 1220830, 1222192, 1207158, 1205190, 1225584, 1215380, 1212278, 1224044, 1225580, 1221309, 1214770, 1205196, 1227690, 1206296, 1225046, 1225045, 1214779, 1206014, 1205587, 1220060, 1208189, 1224857, 1221053, 1226195, 1226825, 1205167, 1225963, 1218092, 121…	2095	3165	6441	1.03259	1	0.734525	53.1601
GOTERM_BP_ALL	GO:0006357~regulation of transcription from RNA polymerase II promoter	80	0.864865	0.0419894	1226848, 1209925, 1225323, 1217589, 1223885, 1214502, 1218101, 1211448, 1209961, 1207399, 1206023, 1209863, 1209012, 1222503, 1205822, 1225423, 1225097, 1226614, 1225819, 1210315, 1227550, 1212631, 1222732, 1211933, 1225942, 1209760, 1214816, 1227466, 1206926, 1219164, 1222988, 1218756, 1207285, 1213574, 1208641, 1227137, 1214011, 1224770, 1208082, 1217891, 1212364, 1224604, 1223340, 1218092, 121…	2095	206	6441	1.19397	1	0.743161	54.3673
GOTERM_BP_ALL	GO:0019941~modification-dependent protein catabolic process	49	0.52973	0.0425595	1224722, 1220686, 1227232, 1214582, 1220317, 1205694, 1213005, 1212604, 1210672, 1225513, 1218935, 1227479, 1217310, 1221740, 1209052, 1217255, 1225053, 1224968, 1214823, 1221803, 1214928, 1211736, 1219468, 1227690, 1211938, 1213530, 1208378, 1205636, 1209767, 1220373, 1209371, 1226203, 1218855, 1215758, 1222909, 1219055, 1220349, 1220958, 1220696, 1215550, 1222207, 1211573, 1210009, 1226580, 121…	2095	119	6441	1.26596	1	0.744783	54.8614
GOTERM_BP_ALL	GO:0043632~modification-dependent macromolecule catabolic process	49	0.52973	0.0425595	1224722, 1220686, 1227232, 1214582, 1220317, 1205694, 1213005, 1212604, 1210672, 1225513, 1218935, 1227479, 1217310, 1221740, 1209052, 1217255, 1225053, 1224968, 1214823, 1221803, 1214928, 1211736, 1219468, 1227690, 1211938, 1213530, 1208378, 1205636, 1209767, 1220373, 1209371, 1226203, 1218855, 1215758, 1222909, 1219055, 1220349, 1220958, 1220696, 1215550, 1222207, 1211573, 1210009, 1226580, 121…	2095	119	6441	1.26596	1	0.744783	54.8614
GOTERM_BP_ALL	GO:0051239~regulation of multicellular organismal process	112	1.21081	0.0433867	1226848, 1225420, 1227684, 1207043, 1227404, 1217539, 1208825, 1213520, 1211448, 1220648, 1206023, 1208381, 1219609, 1227193, 1205822, 1224969, 1225423, 1226614, 1213633, 1207158, 1225430, 1210315, 1214704, 1222732, 1221302, 1224457, 1208470, 1214305, 1214240, 1206113, 1206447, 1226198, 1227137, 1208696, 1205365, 1224191, 1206187, 1211783, 1221438, 1209558, 1209379, 1220230, 1222627, 1225777, 121…	2095	298	6441	1.1555	1	0.74848	55.5693
GOTERM_BP_ALL	GO:0006812~cation transport	99	1.07027	0.0451444	1221412, 1226173, 1218742, 1220848, 1213520, 1208175, 1220451, 1220785, 1223425, 1209820, 1211656, 1213115, 1224560, 1208912, 1207051, 1222732, 1222841, 1216762, 1218899, 1227108, 1212320, 1224248, 1216633, 1221765, 1224151, 1215309, 1224981, 1224906, 1213856, 1211700, 1215300, 1205476, 1216334, 1206830, 1226345, 1215400, 1221828, 1219550, 1215619, 1205510, 1224783, 1206843, 1205899, 1222309, 120…	2095	261	6441	1.16618	1	0.759401	57.0389
GOTERM_BP_ALL	GO:0019953~sexual reproduction	35	0.378378	0.0455787	1225420, 1210654, 1227404, 1205974, 1206187, 1218811, 1208082, 1211768, 1226328, 1212170, 1212195, 1218788, 1219848, 1220727, 1213339, 1213992, 1213258, 1220808, 1220194, 1210416, 1227195, 1209117, 1213702, 1214368, 1215380, 1207406, 1221445, 1217432, 1224310, 1225049, 1219048, 1209608, 1205929, 1208478, 1206389	2095	81	6441	1.32847	1	0.759714	57.3949
GOTERM_BP_ALL	GO:0032583~regulation of gene-specific transcription	18	0.194595	0.0462954	1220349, 1227137, 1226263, 1223555, 1212631, 1211933, 1216440, 1215943, 1227630, 1217589, 1214808, 1221660, 1214816, 1222988, 1205574, 1209012, 1225097, 1221725	2095	36	6441	1.53723	1	0.762164	57.9763
GOTERM_BP_ALL	GO:0048513~organ development	195	2.10811	0.0463227	1226848, 1225420, 1207146, 1227404, 1209925, 1224469, 1226947, 1218101, 1206023, 1218602, 1227190, 1205822, 1224969, 1225423, 1216202, 1207158, 1226939, 1218083, 1221302, 1224457, 1218756, 1209041, 1212686, 1225185, 1223951, 1206447, 1224857, 1206187, 1221438, 1218788, 1222691, 1206180, 1220230, 1211533, 1218725, 1218475, 1211530, 1215905, 1211915, 1223596, 1213655, 1225974, 1205402, 1224162, 122…	2095	541	6441	1.10817	1	0.759383	57.9983
GOTERM_BP_ALL	GO:0009653~anatomical structure morphogenesis	141	1.52432	0.0468885	1226848, 1227684, 1225369, 1208778, 1227404, 1216060, 1209309, 1214950, 1226947, 1217539, 1227011, 1218101, 1211829, 1222547, 1211448, 1206023, 1211960, 1218602, 1205822, 1225423, 1215971, 1226614, 1207158, 1210315, 1208914, 1226939, 1209318, 1218083, 1221302, 1224457, 1216764, 1214305, 1215825, 1225022, 1206113, 1218756, 1209041, 1205771, 1206447, 1225185, 1224857, 1226198, 1227137, 1206187, 121…	2095	383	6441	1.13185	1	0.760676	58.4517
GOTERM_BP_ALL	GO:0007281~germ cell development	16	0.172973	0.0475507	1209117, 1214368, 1227404, 1215380, 1206187, 1218811, 1207406, 1218788, 1212195, 1224310, 1220727, 1213339, 1220808, 1205929, 1208478, 1206389	2095	31	6441	1.58682	1	0.762653	58.9764
GOTERM_BP_ALL	GO:0006350~transcription	133	1.43784	0.0479703	1205105, 1208778, 1207041, 1214782, 1227604, 1210091, 1217589, 1224173, 1214502, 1227602, 1218101, 1216589, 1224963, 1224364, 1206023, 1218202, 1218417, 1227195, 1225912, 1225423, 1221394, 1214572, 1207158, 1225430, 1225584, 1221891, 1208583, 1213635, 1221309, 1205429, 1227364, 1222636, 1217289, 1213727, 1214967, 1220463, 1213304, 1206447, 1214638, 1220060, 1223020, 1210654, 1211276, 1218092, 122…	2095	360	6441	1.13584	1	0.762821	59.3057
GOTERM_BP_ALL	GO:0018193~peptidyl-amino acid modification	27	0.291892	0.0507613	1206642, 1210796, 1221503, 1212195, 1207740, 1222595, 1222598, 1211272, 1223986, 1225957, 1208534, 1225650, 1206766, 1219413, 1208074, 1213801, 1211165, 1206155, 1209087, 1214986, 1217432, 1218900, 1220737, 1219040, 1205960, 1206800, 1210929	2095	60	6441	1.38351	1	0.779547	61.4333
GOTERM_BP_ALL	GO:0009057~macromolecule catabolic process	73	0.789189	0.0518239	1226654, 1224722, 1220686, 1214582, 1225466, 1227232, 1220317, 1213005, 1205694, 1213625, 1225793, 1210672, 1212604, 1225513, 1218935, 1227479, 1217310, 1221740, 1209052, 1217255, 1225053, 1224968, 1227301, 1214823, 1220194, 1227195, 1214928, 1221803, 1210357, 1211736, 1206347, 1226460, 1219468, 1227690, 1211938, 1213530, 1208378, 1226809, 1205636, 1209767, 1220373, 1226254, 1209753, 1209371, 122…	2095	188	6441	1.19381	1	0.783834	62.2153
GOTERM_BP_ALL	GO:0022008~neurogenesis	69	0.745946	0.0539946	1205695, 1225369, 1216060, 1209309, 1206128, 1216506, 1224325, 1218101, 1211448, 1220648, 1206023, 1218602, 1211960, 1224825, 1209012, 1205822, 1205666, 1221546, 1224969, 1207507, 1224106, 1207158, 1210315, 1226939, 1222732, 1218083, 1221445, 1224454, 1221302, 1210504, 1225022, 1215825, 1215726, 1222988, 1227463, 1224857, 1208641, 1227137, 1226198, 1206642, 1205222, 1218336, 1224289, 1219141, 121…	2095	177	6441	1.19852	1	0.794944	63.7664
GOTERM_BP_ALL	GO:0042770~DNA damage response, signal transduction	11	0.118919	0.0550028	1226848, 1210315, 1213339, 1213801, 1226448, 1225323, 1226093, 1207406, 1214988, 1211267, 1220104	2095	19	6441	1.77995	1	0.798441	64.4662
GOTERM_BP_ALL	GO:0055002~striated muscle cell development	11	0.118919	0.0550028	1214305, 1214011, 1208735, 1209914, 1227007, 1218451, 1213999, 1214690, 1224969, 1227490, 1208641	2095	19	6441	1.77995	1	0.798441	64.4662
GOTERM_BP_ALL	GO:0044257~cellular protein catabolic process	54	0.583784	0.0564749	1224722, 1220686, 1225466, 1227232, 1214582, 1220317, 1205694, 1213625, 1213005, 1212604, 1210672, 1225513, 1218935, 1227479, 1217310, 1221740, 1209052, 1217255, 1225053, 1224968, 1214823, 1221803, 1214928, 1211736, 1219468, 1227690, 1211938, 1213530, 1208378, 1205636, 1209767, 1220373, 1209371, 1226203, 1206180, 1218855, 1215758, 1222909, 1208655, 1219055, 1220349, 1220958, 1220696, 1215550, 122…	2095	135	6441	1.22979	1	0.804546	65.4651
GOTERM_BP_ALL	GO:0048747~muscle fiber development	8	0.0864865	0.0583862	1214011, 1209914, 1227007, 1218451, 1214690, 1224969, 1227490, 1208641	2095	12	6441	2.04964	1	0.812832	66.7223
GOTERM_BP_ALL	GO:0015914~phospholipid transport	8	0.0864865	0.0583862	1212382, 1219988, 1225483, 1216752, 1220991, 1227657, 1224035, 1221504	2095	12	6441	2.04964	1	0.812832	66.7223
GOTERM_BP_ALL	GO:0007601~visual perception	21	0.227027	0.0623758	1208093, 1214700, 1224181, 1207000, 1226939, 1212415, 1211844, 1206187, 1224610, 1225974, 1213167, 1214113, 1206741, 1205746, 1220525, 1225942, 1227657, 1224765, 1218624, 1220654, 1213184	2095	45	6441	1.43475	1	0.831306	69.2088
GOTERM_BP_ALL	GO:0050953~sensory perception of light stimulus	21	0.227027	0.0623758	1208093, 1214700, 1224181, 1207000, 1226939, 1212415, 1211844, 1206187, 1224610, 1225974, 1213167, 1214113, 1206741, 1205746, 1220525, 1225942, 1227657, 1224765, 1218624, 1220654, 1213184	2095	45	6441	1.43475	1	0.831306	69.2088
GOTERM_BP_ALL	GO:0051674~localization of cell	43	0.464865	0.0626518	1225420, 1205695, 1206642, 1227404, 1224403, 1214950, 1219141, 1212195, 1218788, 1227011, 1206180, 1215464, 1218725, 1218101, 1215755, 1225099, 1218602, 1215687, 1210889, 1209012, 1222472, 1221161, 1221546, 1220194, 1220103, 1227490, 1211070, 1205039, 1220408, 1211165, 1219509, 1209087, 1224454, 1223876, 1221302, 1225977, 1219048, 1226707, 1206113, 1225068, 1222417, 1220634, 1216489	2095	105	6441	1.25907	1	0.830282	69.3741
GOTERM_BP_ALL	GO:0048870~cell motility	43	0.464865	0.0626518	1225420, 1205695, 1206642, 1227404, 1224403, 1214950, 1219141, 1212195, 1218788, 1227011, 1206180, 1215464, 1218725, 1218101, 1215755, 1225099, 1218602, 1215687, 1210889, 1209012, 1222472, 1221161, 1221546, 1220194, 1220103, 1227490, 1211070, 1205039, 1220408, 1211165, 1219509, 1209087, 1224454, 1223876, 1221302, 1225977, 1219048, 1226707, 1206113, 1225068, 1222417, 1220634, 1216489	2095	105	6441	1.25907	1	0.830282	69.3741
GOTERM_BP_ALL	GO:0051603~proteolysis involved in cellular protein catabolic process	53	0.572973	0.0626682	1224722, 1220686, 1225466, 1227232, 1214582, 1220317, 1205694, 1213625, 1213005, 1212604, 1210672, 1225513, 1218935, 1227479, 1217310, 1221740, 1209052, 1217255, 1225053, 1224968, 1214823, 1221803, 1214928, 1211736, 1219468, 1227690, 1211938, 1213530, 1208378, 1205636, 1209767, 1220373, 1209371, 1226203, 1206180, 1218855, 1215758, 1222909, 1208655, 1219055, 1220349, 1220958, 1220696, 1215550, 122…	2095	133	6441	1.22516	1	0.827977	69.3839
GOTERM_BP_ALL	GO:0031325~positive regulation of cellular metabolic process	104	1.12432	0.0626728	1226848, 1225420, 1219438, 1227404, 1209925, 1210091, 1217589, 1211448, 1217193, 1227190, 1218417, 1219609, 1205822, 1225423, 1226614, 1210315, 1212278, 1208958, 1222732, 1227000, 1223526, 1209041, 1219895, 1227137, 1224770, 1211783, 1221438, 1208557, 1209275, 1220230, 1224981, 1218092, 1218725, 1218475, 1205604, 1211530, 1205574, 1225177, 1226632, 1212089, 1219484, 1218875, 1213984, 1214986, 120…	2095	279	6441	1.14604	1	0.825618	69.3866
GOTERM_BP_ALL	GO:0044265~cellular macromolecule catabolic process	65	0.702703	0.0630056	1224722, 1220686, 1225466, 1227232, 1214582, 1220317, 1205694, 1213625, 1213005, 1210672, 1212604, 1225513, 1218935, 1227479, 1217310, 1221740, 1209052, 1217255, 1225053, 1224968, 1220194, 1214823, 1227195, 1214928, 1221803, 1210357, 1211736, 1226460, 1219468, 1227690, 1211938, 1213530, 1208378, 1226809, 1205636, 1209767, 1220373, 1209753, 1209371, 1226203, 1206180, 1218855, 1226960, 1215758, 121…	2095	167	6441	1.19665	1	0.824914	69.5849
GOTERM_BP_ALL	GO:0048568~embryonic organ development	39	0.421622	0.06363	1222475, 1208778, 1209925, 1208082, 1220313, 1223340, 1226947, 1220230, 1219818, 1216831, 1211448, 1209961, 1211960, 1215905, 1221725, 1216718, 1207507, 1208093, 1215554, 1207158, 1210315, 1211915, 1207703, 1226939, 1209318, 1226263, 1207899, 1212002, 1225942, 1209230, 1224299, 1216841, 1205711, 1225068, 1216887, 1207657, 1225185, 1220654, 1215809	2095	94	6441	1.27558	1	0.825666	69.9534
GOTERM_BP_ALL	GO:0006261~DNA-dependent DNA replication	14	0.151351	0.0656252	1211212, 1217526, 1210391, 1224790, 1214770, 1227543, 1213339, 1217768, 1205918, 1210558, 1216451, 1220741, 1227300, 1210357	2095	27	6441	1.59417	1	0.832988	71.103
GOTERM_BP_ALL	GO:0050954~sensory perception of mechanical stimulus	12	0.12973	0.0665913	1208093, 1210315, 1207703, 1206642, 1210882, 1226939, 1209820, 1211960, 1225185, 1221870, 1226328, 1226702	2095	22	6441	1.67698	1	0.835229	71.6446
GOTERM_BP_ALL	GO:0030384~phosphoinositide metabolic process	12	0.12973	0.0665913	1221585, 1226825, 1223065, 1207346, 1206697, 1208403, 1223439, 1212965, 1212247, 1219574, 1206731, 1212187	2095	22	6441	1.67698	1	0.835229	71.6446
GOTERM_BP_ALL	GO:0016477~cell migration	41	0.443243	0.0679938	1225420, 1205695, 1206642, 1227404, 1224403, 1214950, 1219141, 1212195, 1218788, 1227011, 1206180, 1215464, 1218101, 1218725, 1215755, 1225099, 1218602, 1215687, 1210889, 1209012, 1222472, 1221161, 1221546, 1220103, 1227490, 1211070, 1205039, 1220408, 1211165, 1219509, 1209087, 1224454, 1223876, 1221302, 1225977, 1226707, 1206113, 1225068, 1222417, 1220634, 1216489	2095	100	6441	1.26053	1	0.839376	72.4138
GOTERM_BP_ALL	GO:0030182~neuron differentiation	52	0.562162	0.069473	1209309, 1216060, 1206128, 1216506, 1224325, 1218602, 1211960, 1224825, 1209012, 1205822, 1205666, 1224969, 1224106, 1207507, 1207158, 1210315, 1226939, 1218083, 1221445, 1221302, 1210504, 1215825, 1225022, 1215726, 1224857, 1208641, 1227137, 1226198, 1205222, 1218336, 1224289, 1218788, 1211530, 1215687, 1208858, 1221161, 1225072, 1227490, 1210416, 1226632, 1221725, 1213655, 1225974, 1207899, 120…	2095	131	6441	1.2204	1	0.843702	73.2037
GOTERM_BP_ALL	GO:0007420~brain development	42	0.454054	0.0700952	1227137, 1206642, 1208778, 1206187, 1208082, 1205222, 1221438, 1218788, 1216831, 1208900, 1218101, 1227509, 1213339, 1222547, 1211530, 1224825, 1209012, 1222503, 1205822, 1221546, 1218953, 1227490, 1221725, 1226614, 1216718, 1207158, 1213655, 1225781, 1222732, 1209087, 1223876, 1212002, 1226707, 1213873, 1218756, 1215726, 1216887, 1207926, 1219360, 1207657, 1215809, 1208641	2095	103	6441	1.25366	1	0.844227	73.5295
GOTERM_BP_ALL	GO:0051726~regulation of cell cycle	34	0.367568	0.0723043	1226848, 1220373, 1226093, 1216440, 1205743, 1216831, 1209510, 1215440, 1213339, 1213353, 1215755, 1216451, 1225423, 1220104, 1207158, 1212089, 1213801, 1221923, 1212143, 1208958, 1207899, 1205428, 1208569, 1208255, 1207406, 1214986, 1211267, 1221302, 1222988, 1223870, 1226448, 1209998, 1217768, 1208641	2095	81	6441	1.29052	1	0.851339	74.6562
GOTERM_BP_ALL	GO:0016311~dephosphorylation	34	0.367568	0.0723043	1214409, 1205084, 1217489, 1225539, 1214835, 1212621, 1222691, 1212609, 1220230, 1211633, 1224081, 1224945, 1212247, 1207487, 1205214, 1223698, 1206340, 1214326, 1227458, 1220822, 1223228, 1205752, 1208995, 1211504, 1225046, 1226604, 1226920, 1206073, 1208520, 1215743, 1217022, 1206820, 1217364, 1210728	2095	81	6441	1.29052	1	0.851339	74.6562
GOTERM_BP_ALL	GO:0050890~cognition	44	0.475676	0.0741421	1206642, 1207000, 1227609, 1206187, 1211844, 1226173, 1226328, 1214113, 1206741, 1205746, 1216214, 1210882, 1215755, 1209820, 1211960, 1208381, 1218624, 1209672, 1213184, 1221828, 1214700, 1224181, 1208093, 1210315, 1207703, 1226939, 1212415, 1224610, 1225974, 1209089, 1222732, 1213167, 1220525, 1225942, 1224299, 1227657, 1224765, 1225185, 1221375, 1221870, 1222296, 1226702, 1220654, 1208641	2095	109	6441	1.24107	1	0.856608	75.559
GOTERM_BP_ALL	GO:0006417~regulation of translation	15	0.162162	0.0742722	1209753, 1227685, 1221253, 1215380, 1208557, 1218943, 1220727, 1213681, 1210246, 1226785, 1207577, 1226800, 1222716, 1211679, 1208641	2095	30	6441	1.53723	1	0.855086	75.6217
GOTERM_BP_ALL	GO:0048598~embryonic morphogenesis	57	0.616216	0.0768292	1225369, 1227404, 1208778, 1220313, 1226947, 1219831, 1211448, 1209961, 1206023, 1211960, 1225552, 1205822, 1225423, 1226614, 1216718, 1208093, 1207158, 1210315, 1207703, 1226939, 1209318, 1212631, 1221445, 1216764, 1224299, 1218756, 1222212, 1209041, 1225185, 1206447, 1226087, 1227517, 1227137, 1208082, 1223340, 1220230, 1216831, 1215687, 1215905, 1217952, 1220103, 1215554, 1219445, 1211915, 120…	2095	146	6441	1.2003	1	0.862818	76.8242
GOTERM_BP_ALL	GO:0006974~response to DNA damage stimulus	51	0.551351	0.0769388	1226848, 1219438, 1214582, 1221934, 1225323, 1210391, 1227543, 1219934, 1222547, 1209052, 1210357, 1224757, 1226974, 1210315, 1225584, 1220293, 1207406, 1216573, 1214967, 1209044, 1217768, 1209930, 1220060, 1219895, 1223586, 1214282, 1226205, 1218811, 1226093, 1220230, 1217424, 1218785, 1226960, 1224019, 1214045, 1213339, 1217711, 1221471, 1205645, 1220003, 1219769, 1220104, 1212089, 1213801, 122…	2095	129	6441	1.21549	1	0.861265	76.8745
GOTERM_BP_ALL	GO:0006364~rRNA processing	13	0.140541	0.0773154	1219011, 1205405, 1224970, 1214750, 1220145, 1215755, 1211220, 1206231, 1211790, 1205563, 1205486, 1208195, 1208290	2095	25	6441	1.59872	1	0.860707	77.0465
GOTERM_BP_ALL	GO:0016072~rRNA metabolic process	13	0.140541	0.0773154	1219011, 1205405, 1224970, 1214750, 1220145, 1215755, 1211220, 1206231, 1211790, 1205563, 1205486, 1208195, 1208290	2095	25	6441	1.59872	1	0.860707	77.0465
GOTERM_BP_ALL	GO:0030900~forebrain development	28	0.302703	0.0784205	1206642, 1206187, 1208082, 1205222, 1221438, 1216831, 1227509, 1218101, 1211530, 1209012, 1224825, 1205822, 1221546, 1227490, 1226614, 1221725, 1207158, 1222732, 1209087, 1226707, 1218756, 1215726, 1216887, 1207926, 1219360, 1207657, 1208641, 1215809	2095	65	6441	1.32438	1	0.862818	77.5441
GOTERM_BP_ALL	GO:0007605~sensory perception of sound	11	0.118919	0.0788339	1208093, 1210315, 1207703, 1210882, 1226939, 1209820, 1211960, 1225185, 1221870, 1226328, 1226702	2095	20	6441	1.69095	1	0.862398	77.7276
GOTERM_BP_ALL	GO:0031111~negative regulation of microtubule polymerization or depolymerization	6	0.0648649	0.0796459	1210517, 1216060, 1215755, 1216348, 1206128, 1221302	2095	8	6441	2.30585	1	0.86341	78.084
GOTERM_BP_ALL	GO:0016447~somatic recombination of immunoglobulin gene segments	6	0.0648649	0.0796459	1209916, 1222547, 1205574, 1226093, 1207406, 1222130	2095	8	6441	2.30585	1	0.86341	78.084
GOTERM_BP_ALL	GO:0016445~somatic diversification of immunoglobulins	6	0.0648649	0.0796459	1209916, 1222547, 1205574, 1226093, 1207406, 1222130	2095	8	6441	2.30585	1	0.86341	78.084
GOTERM_BP_ALL	GO:0009792~embryonic development ending in birth or egg hatching	60	0.648649	0.0808765	1226654, 1219438, 1227684, 1227404, 1225466, 1222475, 1220313, 1226947, 1223700, 1222547, 1211448, 1206023, 1209012, 1216509, 1220194, 1225097, 1226614, 1216718, 1209117, 1207507, 1208093, 1225430, 1207703, 1220520, 1209318, 1227361, 1207406, 1225942, 1206926, 1206113, 1218756, 1222212, 1209041, 1211357, 1219895, 1227137, 1226093, 1224289, 1223340, 1220230, 1219818, 1216831, 1213339, 1211560, 121…	2095	155	6441	1.19011	1	0.865865	78.6137
GOTERM_BP_ALL	GO:0043009~chordate embryonic development	60	0.648649	0.0808765	1226654, 1219438, 1227684, 1227404, 1225466, 1222475, 1220313, 1226947, 1223700, 1222547, 1211448, 1206023, 1209012, 1216509, 1220194, 1225097, 1226614, 1216718, 1209117, 1207507, 1208093, 1225430, 1207703, 1220520, 1209318, 1227361, 1207406, 1225942, 1206926, 1206113, 1218756, 1222212, 1209041, 1211357, 1219895, 1227137, 1226093, 1224289, 1223340, 1220230, 1219818, 1216831, 1213339, 1211560, 121…	2095	155	6441	1.19011	1	0.865865	78.6137
GOTERM_BP_ALL	GO:0044248~cellular catabolic process	96	1.03784	0.0825428	1224722, 1220686, 1207516, 1214582, 1225466, 1227232, 1217483, 1220317, 1213005, 1213625, 1205694, 1215932, 1223364, 1226328, 1210672, 1212604, 1225706, 1225513, 1218935, 1227479, 1217310, 1221740, 1217448, 1209052, 1217255, 1225053, 1213766, 1227301, 1224968, 1214823, 1220194, 1227195, 1210736, 1214928, 1210357, 1221803, 1211736, 1226460, 1220976, 1205682, 1219468, 1227690, 1211938, 1214150, 121…	2095	259	6441	1.13957	1	0.869722	79.3119
GOTERM_BP_ALL	GO:0045944~positive regulation of transcription from RNA polymerase II promoter	55	0.594595	0.0831433	1226848, 1209925, 1225323, 1217589, 1211448, 1209961, 1207399, 1209863, 1209012, 1222503, 1205822, 1225423, 1225097, 1226614, 1210315, 1222732, 1212631, 1211933, 1225942, 1227466, 1206926, 1214816, 1219164, 1222988, 1207285, 1213574, 1208641, 1227137, 1214011, 1208082, 1217891, 1212364, 1218092, 1214808, 1221660, 1218475, 1211530, 1205574, 1225177, 1226632, 1221725, 1212089, 1218875, 1226263, 120…	2095	141	6441	1.19926	1	0.869919	79.5581
GOTERM_BP_ALL	GO:0007283~spermatogenesis	19	0.205405	0.0836624	1209117, 1213702, 1210654, 1214368, 1215380, 1206187, 1208082, 1221445, 1212170, 1212195, 1224310, 1225049, 1219048, 1213339, 1213258, 1208478, 1206389, 1220194, 1227195	2095	41	6441	1.42475	1	0.869846	79.7688
GOTERM_BP_ALL	GO:0048232~male gamete generation	19	0.205405	0.0836624	1209117, 1213702, 1210654, 1214368, 1215380, 1206187, 1208082, 1221445, 1212170, 1212195, 1224310, 1225049, 1219048, 1213339, 1213258, 1208478, 1206389, 1220194, 1227195	2095	41	6441	1.42475	1	0.869846	79.7688
GOTERM_BP_ALL	GO:0046486~glycerolipid metabolic process	19	0.205405	0.0836624	1217764, 1226825, 1208403, 1217326, 1219574, 1212187, 1206731, 1221585, 1222245, 1220733, 1223065, 1207346, 1206697, 1227108, 1223439, 1227301, 1212965, 1220194, 1212247	2095	41	6441	1.42475	1	0.869846	79.7688
GOTERM_BP_ALL	GO:0043193~positive regulation of gene-specific transcription	14	0.151351	0.087193	1226263, 1223555, 1212631, 1211933, 1227630, 1215943, 1217589, 1214808, 1221660, 1214816, 1222988, 1205574, 1225097, 1221725	2095	28	6441	1.53723	1	0.879348	81.1479
GOTERM_BP_ALL	GO:0022604~regulation of cell morphogenesis	14	0.151351	0.087193	1205695, 1226198, 1206642, 1211165, 1222732, 1206180, 1222627, 1206113, 1227463, 1220648, 1221399, 1225072, 1227490, 1225423	2095	28	6441	1.53723	1	0.879348	81.1479
GOTERM_BP_ALL	GO:0010557~positive regulation of macromolecule biosynthetic process	84	0.908108	0.0886834	1226848, 1227404, 1209925, 1225323, 1216440, 1210091, 1217589, 1220121, 1211448, 1209961, 1207399, 1209863, 1209012, 1222503, 1219609, 1218417, 1205822, 1225423, 1225097, 1212156, 1226614, 1210357, 1227314, 1210315, 1212631, 1222732, 1211933, 1227000, 1225942, 1214816, 1227466, 1206926, 1219164, 1222988, 1207285, 1223526, 1227463, 1213574, 1217768, 1208641, 1227137, 1214011, 1224770, 1208082, 121…	2095	225	6441	1.1478	1	0.882153	81.703
GOTERM_BP_ALL	GO:0007423~sensory organ development	41	0.443243	0.0897485	1208778, 1226947, 1206741, 1220230, 1216831, 1224325, 1209961, 1206023, 1211960, 1208858, 1209012, 1215905, 1210416, 1227490, 1216202, 1215554, 1208093, 1207158, 1210315, 1211915, 1207703, 1226939, 1209318, 1225974, 1207899, 1221445, 1221302, 1212002, 1209230, 1224299, 1216841, 1216887, 1216414, 1216489, 1225185, 1207657, 1206564, 1224857, 1210929, 1220654, 1215809	2095	102	6441	1.23581	1	0.883627	82.0902
GOTERM_BP_ALL	GO:0051146~striated muscle cell differentiation	17	0.183784	0.0898956	1214011, 1218451, 1212631, 1213999, 1227630, 1214305, 1208735, 1209914, 1222988, 1227007, 1209961, 1208381, 1214690, 1224969, 1221161, 1227490, 1208641	2095	36	6441	1.45183	1	0.882401	82.143
GOTERM_BP_ALL	GO:0022618~ribonucleoprotein complex assembly	8	0.0864865	0.0918563	1219445, 1209347, 1214368, 1205373, 1207399, 1207577, 1225720, 1217432	2095	13	6441	1.89198	1	0.886412	82.8337
GOTERM_BP_ALL	GO:0007628~adult walking behavior	8	0.0864865	0.0918563	1207703, 1226939, 1209309, 1225974, 1225323, 1226328, 1214690, 1224969	2095	13	6441	1.89198	1	0.886412	82.8337
GOTERM_BP_ALL	GO:0050921~positive regulation of chemotaxis	8	0.0864865	0.0918563	1218725, 1220408, 1225466, 1209563, 1211165, 1219598, 1215687, 1210889	2095	13	6441	1.89198	1	0.886412	82.8337
GOTERM_BP_ALL	GO:0050920~regulation of chemotaxis	8	0.0864865	0.0918563	1218725, 1220408, 1225466, 1209563, 1211165, 1219598, 1215687, 1210889	2095	13	6441	1.89198	1	0.886412	82.8337
GOTERM_BP_ALL	GO:0022415~viral reproductive process	5	0.0540541	0.0921102	1222475, 1226171, 1211933, 1216440, 1225423	2095	6	6441	2.56205	1	0.885516	82.9212
GOTERM_BP_ALL	GO:0051301~cell division	24	0.259459	0.0925872	1215415, 1211212, 1207630, 1208958, 1227357, 1216668, 1216348, 1208403, 1205543, 1221302, 1206180, 1220727, 1213339, 1219081, 1223526, 1211984, 1216451, 1218501, 1224048, 1205822, 1227490, 1220104, 1206567, 1220604	2095	55	6441	1.34158	1	0.885256	83.0846
GOTERM_BP_ALL	GO:0031328~positive regulation of cellular biosynthetic process	86	0.92973	0.0983721	1226848, 1227404, 1209925, 1225323, 1216440, 1210091, 1217589, 1220121, 1211448, 1209961, 1207399, 1209863, 1209012, 1222503, 1219609, 1218417, 1205822, 1225423, 1225097, 1212156, 1226614, 1210357, 1227314, 1210315, 1212631, 1222732, 1211933, 1227000, 1225942, 1214816, 1227466, 1206926, 1219164, 1222988, 1207285, 1223526, 1227463, 1213574, 1217768, 1208641, 1227137, 1214011, 1224770, 1208082, 121…	2095	232	6441	1.13967	1	0.899015	84.9519
GOTERM_BP_ALL	GO:0032879~regulation of localization	59	0.637838	0.0987518	1205695, 1207592, 1225466, 1216060, 1209436, 1213290, 1216440, 1210091, 1205349, 1227509, 1217193, 1209343, 1209012, 1210889, 1205959, 1225423, 1225097, 1212247, 1213442, 1210315, 1207703, 1209563, 1214704, 1217764, 1226358, 1216669, 1212631, 1221302, 1214305, 1214240, 1206113, 1222988, 1226198, 1224191, 1206187, 1226203, 1221438, 1219598, 1212466, 1209275, 1218788, 1219818, 1218725, 1211530, 120…	2095	154	6441	1.17788	1	0.898474	85.0674
GOTERM_BP_FAT	GO:0016568~chromatin modification	49	0.52973	3.60118e-09	1214782, 1210091, 1217589, 1219831, 1213353, 1206766, 1222403, 1218202, 1221748, 1226983, 1220196, 1211150, 1207703, 1220520, 1225584, 1221891, 1212278, 1205429, 1209621, 1227364, 1213727, 1214967, 1223228, 1219260, 1214816, 1214004, 1213485, 1214638, 1221053, 1225963, 1226302, 1220230, 1214045, 1206243, 1205574, 1209698, 1208460, 1206974, 1220349, 1222829, 1215550, 1220508, 1219159, 1219190, 120…	1870	73	5798	2.08118	1.19666e-05	1.19666e-05	6.55838e-06
GOTERM_BP_FAT	GO:0051276~chromosome organization	73	0.789189	4.4909e-05	1219438, 1208673, 1214782, 1210091, 1217589, 1219831, 1222547, 1213353, 1206766, 1222403, 1218202, 1221748, 1226983, 1224758, 1216119, 1211150, 1220196, 1207703, 1220520, 1225584, 1221891, 1212278, 1205429, 1209621, 1214770, 1227364, 1207406, 1213727, 1214967, 1221302, 1223228, 1219260, 1214816, 1217768, 1214004, 1213485, 1214638, 1221053, 1213477, 1205362, 1210828, 1226093, 1225963, 1205543, 122…	1870	151	5798	1.49893	0.138634	0.071902	0.0817556
GOTERM_BP_FAT	GO:0030030~cell projection organization	51	0.551351	0.000205818	1209309, 1216060, 1206128, 1227011, 1216506, 1215464, 1211960, 1218602, 1209012, 1210889, 1205822, 1205666, 1224969, 1207158, 1213442, 1210315, 1226939, 1218083, 1221302, 1210504, 1215825, 1224299, 1225022, 1215726, 1213070, 1208641, 1226198, 1227257, 1206187, 1224403, 1205222, 1218336, 1218788, 1211530, 1215687, 1227490, 1225072, 1210416, 1220408, 1213655, 1207899, 1208414, 1212187, 1226707, 122…	1870	101	5798	1.56562	0.495407	0.203877	0.374167
GOTERM_BP_FAT	GO:0016569~covalent chromatin modification	24	0.259459	0.000505218	1220349, 1221053, 1220520, 1215550, 1212278, 1214782, 1225963, 1213727, 1226302, 1217432, 1217589, 1220230, 1223228, 1214045, 1214816, 1219260, 1213353, 1206766, 1205574, 1214004, 1213485, 1226983, 1214638, 1211150	1870	39	5798	1.90802	0.813489	0.342832	0.916102
GOTERM_BP_FAT	GO:0051056~regulation of small GTPase mediated signal transduction	60	0.648649	0.000650211	1216993, 1225420, 1226272, 1207147, 1223234, 1208577, 1218935, 1213668, 1208011, 1226794, 1215464, 1217733, 1218041, 1212385, 1209195, 1208381, 1214850, 1226982, 1218494, 1215244, 1209281, 1211779, 1222111, 1222988, 1209142, 1209972, 1217790, 1211691, 1227311, 1223115, 1211133, 1224403, 1225146, 1214461, 1226438, 1219217, 1223097, 1222563, 1214080, 1226536, 1222349, 1221235, 1221161, 1221367, 122…	1870	128	5798	1.45338	0.884831	0.350966	1.17755
GOTERM_BP_FAT	GO:0006816~calcium ion transport	31	0.335135	0.00107401	1227207, 1221954, 1218450, 1208249, 1213520, 1205746, 1213856, 1219818, 1210102, 1220451, 1209015, 1220785, 1223425, 1220002, 1221828, 1205510, 1212415, 1227027, 1211855, 1205899, 1219674, 1222732, 1221021, 1219207, 1211879, 1206159, 1212098, 1218899, 1222414, 1214690, 1211604	1870	57	5798	1.68626	0.971868	0.448515	1.93798
GOTERM_BP_FAT	GO:0006468~protein amino acid phosphorylation	151	1.63243	0.00109473	1226848, 1220356, 1227404, 1209309, 1208062, 1209254, 1221503, 1217539, 1212195, 1220256, 1210576, 1224462, 1213258, 1222069, 1220808, 1219886, 1222444, 1217936, 1224755, 1222447, 1214700, 1215244, 1212066, 1225781, 1209044, 1227185, 1206113, 1226765, 1223629, 1223816, 1224857, 1225189, 1213444, 1206642, 1215608, 1225772, 1210753, 1224981, 1222627, 1211272, 1223253, 1214045, 1213234, 1218725, 122…	1870	379	5798	1.23531	0.973742	0.405462	1.97503
GOTERM_BP_FAT	GO:0055085~transmembrane transport	133	1.43784	0.00116642	1221412, 1215429, 1221188, 1218742, 1220255, 1213739, 1226750, 1213520, 1219535, 1220451, 1212309, 1206121, 1223425, 1220785, 1222541, 1209820, 1223230, 1211656, 1213115, 1221386, 1224560, 1207625, 1221212, 1208912, 1206441, 1217006, 1217205, 1207051, 1226560, 1209385, 1206192, 1221406, 1223434, 1226042, 1210588, 1225372, 1218899, 1224765, 1220779, 1225183, 1221066, 1227108, 1219616, 1212320, 120…	1870	329	5798	1.25341	0.979314	0.38417	2.10307
GOTERM_BP_FAT	GO:0007155~cell adhesion	108	1.16757	0.00122821	1225420, 1210849, 1227605, 1214950, 1218764, 1208403, 1211768, 1227011, 1220649, 1211552, 1225191, 1221116, 1224106, 1213442, 1208507, 1226939, 1209422, 1218083, 1206771, 1214305, 1225022, 1227007, 1220634, 1208478, 1212069, 1211832, 1223951, 1221399, 1224250, 1224709, 1210136, 1209080, 1206741, 1211535, 1226961, 1225072, 1224244, 1218888, 1215415, 1211915, 1225621, 1216694, 1213655, 1205469, 121…	1870	260	5798	1.28791	0.983157	0.364765	2.21329
GOTERM_BP_FAT	GO:0022610~biological adhesion	108	1.16757	0.00122821	1225420, 1210849, 1227605, 1214950, 1218764, 1208403, 1211768, 1227011, 1220649, 1211552, 1225191, 1221116, 1224106, 1213442, 1208507, 1226939, 1209422, 1218083, 1206771, 1214305, 1225022, 1227007, 1220634, 1208478, 1212069, 1211832, 1223951, 1221399, 1224250, 1224709, 1210136, 1209080, 1206741, 1211535, 1226961, 1225072, 1224244, 1218888, 1215415, 1211915, 1225621, 1216694, 1213655, 1205469, 121…	1870	260	5798	1.28791	0.983157	0.364765	2.21329
GOTERM_BP_FAT	GO:0050808~synapse organization	13	0.140541	0.00132647	1214011, 1210315, 1218451, 1224457, 1211535, 1225022, 1209914, 1227007, 1214690, 1205666, 1224969, 1221161, 1208641	1870	17	5798	2.371	0.987854	0.356657	2.38835
GOTERM_BP_FAT	GO:0006325~chromatin organization	55	0.594595	0.0016876	1214782, 1210091, 1217589, 1219831, 1213353, 1206766, 1222403, 1218202, 1221748, 1226983, 1216119, 1224758, 1211150, 1220196, 1207703, 1220520, 1225584, 1221891, 1212278, 1205429, 1209621, 1214770, 1227364, 1213727, 1214967, 1223228, 1219260, 1214816, 1214004, 1213485, 1214638, 1221053, 1205362, 1225963, 1226302, 1220230, 1214045, 1206243, 1205574, 1220372, 1209698, 1208460, 1206974, 1220349, 122…	1870	119	5798	1.43302	0.996349	0.399649	3.02919
GOTERM_BP_FAT	GO:0016570~histone modification	22	0.237838	0.00174125	1220349, 1221053, 1220520, 1215550, 1214782, 1225963, 1213727, 1226302, 1217432, 1217589, 1220230, 1223228, 1214045, 1214816, 1219260, 1213353, 1206766, 1205574, 1214004, 1226983, 1214638, 1211150	1870	37	5798	1.84356	0.996946	0.382824	3.12405
GOTERM_BP_FAT	GO:0006796~phosphate metabolic process	201	2.17297	0.00188034	1226848, 1220356, 1217489, 1227404, 1221503, 1209254, 1208403, 1220256, 1210576, 1224462, 1213258, 1222069, 1211558, 1209820, 1219886, 1208912, 1215244, 1207051, 1225046, 1225045, 1209044, 1227185, 1206820, 1225189, 1224857, 1215608, 1226825, 1222691, 1224981, 1220230, 1210753, 1211272, 1218725, 1213234, 1222699, 1205701, 1207577, 1224440, 1211530, 1224302, 1217472, 1205075, 1210950, 1219734, 121…	1870	526	5798	1.18481	0.998078	0.381895	3.36958
GOTERM_BP_FAT	GO:0006793~phosphorus metabolic process	201	2.17297	0.00188034	1226848, 1220356, 1217489, 1227404, 1221503, 1209254, 1208403, 1220256, 1210576, 1224462, 1213258, 1222069, 1211558, 1209820, 1219886, 1208912, 1215244, 1207051, 1225046, 1225045, 1209044, 1227185, 1206820, 1225189, 1224857, 1215608, 1226825, 1222691, 1224981, 1220230, 1210753, 1211272, 1218725, 1213234, 1222699, 1205701, 1207577, 1224440, 1211530, 1224302, 1217472, 1205075, 1210950, 1219734, 121…	1870	526	5798	1.18481	0.998078	0.381895	3.36958
GOTERM_BP_FAT	GO:0006811~ion transport	152	1.64324	0.00237697	1221412, 1215429, 1221188, 1226173, 1218742, 1220848, 1213520, 1206780, 1208175, 1220451, 1206121, 1223425, 1220785, 1213316, 1222541, 1209820, 1218499, 1211656, 1213115, 1224560, 1213633, 1208912, 1207051, 1209385, 1222732, 1222841, 1216762, 1206111, 1218899, 1224765, 1227108, 1205110, 1221066, 1205946, 1212320, 1224248, 1216633, 1221765, 1215309, 1224151, 1213856, 1224981, 1224906, 1215300, 120…	1870	388	5798	1.21464	0.999632	0.431562	4.24146
GOTERM_BP_FAT	GO:0043414~biopolymer methylation	15	0.162162	0.00240574	1220349, 1211774, 1212278, 1207473, 1209925, 1218977, 1207041, 1215161, 1214782, 1205405, 1207172, 1217432, 1222403, 1214004, 1213485	1870	22	5798	2.114	0.999666	0.413507	4.29174
GOTERM_BP_FAT	GO:0035023~regulation of Rho protein signal transduction	25	0.27027	0.0026344	1216993, 1211133, 1226272, 1224403, 1223234, 1208577, 1223097, 1214080, 1215464, 1218041, 1212385, 1214850, 1221235, 1226982, 1221367, 1209281, 1224023, 1209544, 1222111, 1226403, 1225661, 1218305, 1215744, 1217907, 1217790	1870	45	5798	1.72252	0.999844	0.421811	4.69047
GOTERM_BP_FAT	GO:0006304~DNA modification	9	0.0972973	0.00265487	1209925, 1212278, 1207473, 1207041, 1222403, 1213485, 1207172, 1210386, 1217432	1870	10	5798	2.79048	0.999854	0.405265	4.72609
GOTERM_BP_FAT	GO:0006928~cell motion	61	0.659459	0.00272493	1205695, 1225420, 1227404, 1209309, 1214950, 1212195, 1227011, 1215464, 1218101, 1218602, 1225099, 1209012, 1210889, 1222472, 1205666, 1221546, 1220194, 1207158, 1207406, 1218083, 1209087, 1224454, 1221302, 1225022, 1215825, 1206113, 1215726, 1220634, 1206389, 1208641, 1226198, 1206642, 1224403, 1218336, 1219141, 1218788, 1206180, 1218725, 1215755, 1215687, 1221161, 1220103, 1210416, 1225072, 122…	1870	137	5798	1.38053	0.999885	0.395732	4.84789
GOTERM_BP_FAT	GO:0034330~cell junction organization	11	0.118919	0.00302328	1213442, 1225369, 1218382, 1223870, 1212318, 1205222, 1219509, 1219040, 1221399, 1225423, 1225097	1870	14	5798	2.43613	0.999957	0.411134	5.36499
GOTERM_BP_FAT	GO:0030001~metal ion transport	84	0.908108	0.00373822	1221412, 1227058, 1218450, 1217544, 1226173, 1208249, 1218742, 1220848, 1213520, 1218458, 1214407, 1226884, 1208175, 1225852, 1220096, 1220451, 1223425, 1220785, 1209015, 1211656, 1225463, 1213115, 1216795, 1224560, 1222732, 1221021, 1211879, 1206159, 1218468, 1222841, 1216762, 1220299, 1218899, 1211604, 1208640, 1222291, 1227207, 1221954, 1212320, 1224248, 1216633, 1221765, 1212622, 1215309, 121…	1870	201	5798	1.29575	0.999996	0.463275	6.59331
GOTERM_BP_FAT	GO:0018212~peptidyl-tyrosine modification	18	0.194595	0.00483858	1208074, 1206642, 1211165, 1210796, 1221503, 1209087, 1212195, 1214986, 1222595, 1211272, 1225957, 1218900, 1220737, 1219040, 1219413, 1205960, 1206800, 1210929	1870	30	5798	1.86032	1	0.535831	8.4544
GOTERM_BP_FAT	GO:0018108~peptidyl-tyrosine phosphorylation	18	0.194595	0.00483858	1208074, 1206642, 1211165, 1210796, 1221503, 1209087, 1212195, 1214986, 1222595, 1211272, 1225957, 1218900, 1220737, 1219040, 1219413, 1205960, 1206800, 1210929	1870	30	5798	1.86032	1	0.535831	8.4544
GOTERM_BP_FAT	GO:0046578~regulation of Ras protein signal transduction	47	0.508108	0.00522354	1225420, 1216993, 1211133, 1226272, 1224403, 1223234, 1208577, 1218935, 1213668, 1226438, 1219217, 1208011, 1223097, 1215464, 1222563, 1217733, 1214080, 1218041, 1212385, 1208381, 1214850, 1222349, 1221235, 1221161, 1218494, 1226982, 1221367, 1215244, 1209281, 1221778, 1224023, 1222111, 1209544, 1226403, 1225661, 1211813, 1218305, 1215744, 1222988, 1217418, 1209142, 1217907, 1209972, 1207268, 121…	1870	103	5798	1.41481	1	0.546636	9.09719
GOTERM_BP_FAT	GO:0031175~neuron projection development	34	0.367568	0.00629576	1226198, 1216060, 1209309, 1218336, 1205222, 1206128, 1218788, 1216506, 1211530, 1218602, 1215687, 1209012, 1205666, 1205822, 1224969, 1225072, 1210416, 1227490, 1207158, 1210315, 1213655, 1207899, 1218083, 1208414, 1221302, 1210504, 1226707, 1225022, 1215825, 1226024, 1215726, 1211521, 1212952, 1208641	1870	70	5798	1.50597	1	0.598471	10.8651
GOTERM_BP_FAT	GO:0010628~positive regulation of gene expression	82	0.886486	0.00647043	1226848, 1227404, 1209925, 1225323, 1212195, 1210091, 1217589, 1220121, 1211448, 1209961, 1207399, 1209863, 1210889, 1209012, 1222503, 1219609, 1218417, 1205822, 1225423, 1225097, 1212156, 1226614, 1227314, 1210315, 1212278, 1212631, 1222732, 1211933, 1227000, 1225942, 1214816, 1227466, 1206926, 1219164, 1222988, 1207285, 1223526, 1227463, 1213574, 1217768, 1208641, 1227137, 1214011, 1224770, 120…	1870	199	5798	1.27761	1	0.592941	11.15
GOTERM_BP_FAT	GO:0006306~DNA methylation	8	0.0864865	0.00668935	1209925, 1212278, 1207473, 1207041, 1222403, 1213485, 1207172, 1217432	1870	9	5798	2.75603	1	0.59022	11.5059
GOTERM_BP_FAT	GO:0006338~chromatin remodeling	8	0.0864865	0.00668935	1214045, 1219190, 1219975, 1206243, 1227364, 1213485, 1210091, 1208460	1870	9	5798	2.75603	1	0.59022	11.5059
GOTERM_BP_FAT	GO:0006305~DNA alkylation	8	0.0864865	0.00668935	1209925, 1212278, 1207473, 1207041, 1222403, 1213485, 1207172, 1217432	1870	9	5798	2.75603	1	0.59022	11.5059
GOTERM_BP_FAT	GO:0007169~transmembrane receptor protein tyrosine kinase signaling pathway	42	0.454054	0.00674698	1214011, 1222475, 1209309, 1218451, 1208062, 1208268, 1214428, 1216440, 1217539, 1212195, 1220256, 1216831, 1210805, 1225957, 1219886, 1213587, 1222472, 1224302, 1227524, 1208074, 1220408, 1205075, 1210950, 1211165, 1225642, 1219734, 1225781, 1223353, 1208414, 1214986, 1207112, 1218138, 1226024, 1216661, 1218900, 1215705, 1214479, 1206800, 1210929, 1224857, 1225189, 1211062	1870	91	5798	1.43102	1	0.579048	11.5993
GOTERM_BP_FAT	GO:0015674~di-, tri-valent inorganic cation transport	31	0.335135	0.00752555	1227207, 1221954, 1218450, 1208249, 1213520, 1205746, 1213856, 1219818, 1210102, 1220451, 1209015, 1220785, 1223425, 1220002, 1221828, 1205510, 1212415, 1227027, 1211855, 1205899, 1219674, 1222732, 1221021, 1219207, 1211879, 1206159, 1212098, 1218899, 1222414, 1214690, 1211604	1870	63	5798	1.52566	1	0.605329	12.8528
GOTERM_BP_FAT	GO:0001701~in utero embryonic development	36	0.389189	0.00785313	1226654, 1219438, 1227404, 1225466, 1226093, 1223700, 1219818, 1213339, 1211560, 1215755, 1222909, 1220194, 1216509, 1225097, 1227490, 1221725, 1209117, 1207507, 1215554, 1225430, 1207703, 1226263, 1219190, 1227361, 1207406, 1227630, 1225942, 1206926, 1206113, 1207223, 1218756, 1205711, 1225068, 1216887, 1211623, 1211357	1870	76	5798	1.46867	1	0.60768	13.3752
GOTERM_BP_FAT	GO:0040029~regulation of gene expression, epigenetic	16	0.172973	0.0101801	1219445, 1209753, 1226460, 1212278, 1207473, 1209925, 1207041, 1214782, 1217603, 1226441, 1207172, 1217432, 1222403, 1213485, 1219895, 1209698	1870	27	5798	1.83735	1	0.6904	17.0014
GOTERM_BP_FAT	GO:0006396~RNA processing	59	0.637838	0.0109016	1214543, 1218977, 1209436, 1224690, 1215161, 1224994, 1206166, 1216358, 1220158, 1213830, 1209347, 1218490, 1213493, 1227195, 1205995, 1226460, 1216822, 1217721, 1225689, 1212832, 1220161, 1219994, 1205486, 1224251, 1208641, 1221819, 1226475, 1218816, 1210867, 1208900, 1219215, 1224349, 1220145, 1225205, 1215755, 1214252, 1224677, 1208195, 1208290, 1219011, 1226640, 1219445, 1214368, 1210383, 120…	1870	139	5798	1.31605	1	0.703041	18.0964
GOTERM_BP_FAT	GO:0016310~phosphorylation	166	1.79459	0.0114602	1226848, 1220356, 1227404, 1209309, 1208062, 1209254, 1221503, 1208403, 1212195, 1217539, 1220256, 1210576, 1224462, 1213258, 1222069, 1220808, 1211558, 1209820, 1219886, 1222444, 1217936, 1224755, 1222447, 1214700, 1208912, 1215244, 1207051, 1212066, 1225781, 1225045, 1209044, 1227185, 1206113, 1226765, 1223629, 1223816, 1207346, 1224857, 1225189, 1213444, 1206642, 1215608, 1226825, 1225772, 121…	1870	443	5798	1.16183	1	0.709327	18.9348
GOTERM_BP_FAT	GO:0007167~enzyme linked receptor protein signaling pathway	57	0.616216	0.0117945	1222475, 1227404, 1209309, 1225323, 1218451, 1208062, 1216440, 1212195, 1217539, 1206954, 1220256, 1210805, 1225957, 1219886, 1222472, 1227302, 1225423, 1225642, 1225781, 1207112, 1218138, 1216661, 1213873, 1218756, 1206113, 1218900, 1214479, 1224857, 1225189, 1210929, 1214011, 1210796, 1208268, 1214428, 1216831, 1214974, 1213992, 1213587, 1224302, 1210416, 1227524, 1208074, 1205075, 1220408, 121…	1870	134	5798	1.31888	1	0.70831	19.4325
GOTERM_BP_FAT	GO:0000902~cell morphogenesis	44	0.475676	0.012096	1226848, 1226198, 1221355, 1216060, 1209309, 1206187, 1205222, 1218336, 1217539, 1218788, 1211560, 1211530, 1211960, 1218602, 1215687, 1209012, 1205666, 1205822, 1221161, 1225072, 1210416, 1227490, 1226614, 1207158, 1226939, 1213655, 1219509, 1207899, 1218083, 1208414, 1221302, 1226707, 1225022, 1226024, 1215825, 1206113, 1207223, 1215726, 1223870, 1225068, 1205929, 1205771, 1212952, 1208641	1870	99	5798	1.37802	1	0.706378	19.8791
GOTERM_BP_FAT	GO:0007049~cell cycle	62	0.67027	0.012413	1219438, 1227404, 1208673, 1227113, 1210391, 1224469, 1219848, 1222225, 1224462, 1216451, 1218501, 1227193, 1225423, 1220604, 1215380, 1207630, 1208958, 1220828, 1216668, 1227364, 1207406, 1224454, 1221302, 1206962, 1206589, 1215103, 1223526, 1217186, 1214004, 1224048, 1219895, 1220060, 1208641, 1220373, 1210828, 1227357, 1226093, 1205543, 1219818, 1224981, 1224019, 1213234, 1225305, 1213339, 121…	1870	148	5798	1.29887	1	0.704999	20.3459
GOTERM_BP_FAT	GO:0045941~positive regulation of transcription	78	0.843243	0.0136167	1226848, 1227404, 1209925, 1225323, 1210091, 1217589, 1220121, 1211448, 1209961, 1207399, 1209863, 1209012, 1222503, 1219609, 1218417, 1205822, 1225423, 1225097, 1212156, 1226614, 1227314, 1210315, 1212631, 1222732, 1211933, 1227000, 1225942, 1214816, 1227466, 1206926, 1219164, 1222988, 1207285, 1223526, 1227463, 1213574, 1217768, 1208641, 1227137, 1214011, 1224770, 1208082, 1217891, 1212364, 122…	1870	193	5798	1.25307	1	0.727929	22.0956
GOTERM_BP_FAT	GO:0000904~cell morphogenesis involved in differentiation	35	0.378378	0.0146258	1226198, 1216060, 1209309, 1218336, 1205222, 1218788, 1211530, 1211960, 1218602, 1215687, 1209012, 1205666, 1205822, 1225072, 1210416, 1227490, 1226614, 1207158, 1226939, 1213655, 1219509, 1207899, 1218083, 1208414, 1221302, 1226707, 1225022, 1215825, 1226024, 1206113, 1215726, 1225068, 1205929, 1212952, 1208641	1870	76	5798	1.42788	1	0.743342	23.5343
GOTERM_BP_FAT	GO:0045935~positive regulation of nucleobase, nucleoside, nucleotide and nucleic acid metabolic process	86	0.92973	0.0146501	1226848, 1219438, 1227404, 1209925, 1225323, 1216440, 1210091, 1217589, 1220121, 1211448, 1209961, 1207399, 1209863, 1209012, 1222503, 1219609, 1218417, 1205822, 1225423, 1225097, 1212156, 1226614, 1210357, 1227314, 1210315, 1212631, 1222732, 1211933, 1227000, 1225942, 1214816, 1227466, 1206926, 1219164, 1222988, 1207285, 1223526, 1227463, 1213574, 1217768, 1208641, 1227137, 1214011, 1224770, 120…	1870	216	5798	1.23447	1	0.734322	23.5687
GOTERM_BP_FAT	GO:0030031~cell projection assembly	16	0.172973	0.015496	1213442, 1226939, 1220408, 1206187, 1227257, 1224403, 1227011, 1210504, 1215464, 1207223, 1218382, 1223870, 1210889, 1219040, 1213070, 1227490	1870	28	5798	1.77173	1	0.744795	24.7548
GOTERM_BP_FAT	GO:0032990~cell part morphogenesis	33	0.356757	0.0155131	1226198, 1216060, 1209309, 1206187, 1218336, 1205222, 1218788, 1211829, 1211530, 1218602, 1209012, 1215687, 1205666, 1205822, 1225072, 1210416, 1227490, 1207158, 1226939, 1208914, 1213655, 1207899, 1218083, 1208414, 1221302, 1226707, 1225022, 1215825, 1226024, 1207223, 1215726, 1212952, 1208641	1870	71	5798	1.44109	1	0.736091	24.7786
GOTERM_BP_FAT	GO:0007409~axonogenesis	28	0.302703	0.0155445	1226198, 1216060, 1209309, 1218336, 1205222, 1218788, 1211530, 1218602, 1209012, 1215687, 1205666, 1205822, 1225072, 1227490, 1210416, 1207158, 1213655, 1207899, 1218083, 1208414, 1221302, 1226707, 1215825, 1226024, 1225022, 1215726, 1212952, 1208641	1870	58	5798	1.49681	1	0.727876	24.8223
GOTERM_BP_FAT	GO:0045893~positive regulation of transcription, DNA-dependent	65	0.702703	0.016221	1226848, 1209925, 1225323, 1210091, 1217589, 1220121, 1211448, 1209961, 1207399, 1209863, 1209012, 1222503, 1218417, 1219609, 1205822, 1225423, 1225097, 1226614, 1227314, 1210315, 1212631, 1222732, 1211933, 1227000, 1225942, 1227466, 1206926, 1214816, 1219164, 1222988, 1207285, 1213574, 1208641, 1227137, 1214011, 1224770, 1208082, 1217891, 1212364, 1218092, 1214808, 1221660, 1218475, 1211530, 120…	1870	158	5798	1.27554	1	0.734323	25.7577
GOTERM_BP_FAT	GO:0048858~cell projection morphogenesis	31	0.335135	0.0164005	1226198, 1216060, 1206187, 1209309, 1218336, 1205222, 1218788, 1211530, 1218602, 1209012, 1215687, 1205666, 1205822, 1225072, 1210416, 1227490, 1207158, 1226939, 1213655, 1207899, 1218083, 1208414, 1221302, 1226707, 1225022, 1215825, 1226024, 1215726, 1207223, 1212952, 1208641	1870	66	5798	1.45631	1	0.729735	26.004
GOTERM_BP_FAT	GO:0033554~cellular response to stress	67	0.724324	0.0173179	1226848, 1219438, 1214582, 1221934, 1225323, 1226171, 1210391, 1227543, 1219934, 1222547, 1209052, 1219609, 1227190, 1224757, 1210357, 1226974, 1210315, 1225584, 1220293, 1207406, 1216573, 1214967, 1225942, 1209044, 1209930, 1217768, 1225475, 1220060, 1219895, 1227517, 1223586, 1214282, 1226205, 1218811, 1226093, 1208557, 1220230, 1213998, 1208900, 1217424, 1218785, 1224019, 1226960, 1214045, 121…	1870	164	5798	1.26668	1	0.740769	27.2508
GOTERM_BP_FAT	GO:0007242~intracellular signaling cascade	142	1.53514	0.0176715	1226848, 1208300, 1216818, 1216060, 1208403, 1217539, 1212195, 1208577, 1220256, 1221485, 1225982, 1212385, 1220808, 1223429, 1208381, 1211559, 1206436, 1214850, 1227190, 1205959, 1226556, 1214373, 1224262, 1208383, 1214700, 1210315, 1224761, 1225781, 1211779, 1223225, 1222111, 1225028, 1210504, 1212974, 1213054, 1224453, 1226765, 1227009, 1207346, 1205831, 1213106, 1206385, 1211133, 1226825, 122…	1870	378	5798	1.16475	1	0.739859	27.7261
GOTERM_BP_FAT	GO:0043062~extracellular structure organization	27	0.291892	0.0180875	1211030, 1210847, 1214011, 1218451, 1211381, 1211535, 1226051, 1209914, 1205666, 1214015, 1224969, 1221161, 1227490, 1216718, 1208093, 1211915, 1210315, 1219509, 1224457, 1224299, 1225022, 1205336, 1227007, 1219360, 1216489, 1214690, 1208641	1870	56	5798	1.4949	1	0.740212	28.2815
GOTERM_BP_FAT	GO:0048609~reproductive process in a multicellular organism	41	0.443243	0.0181663	1225420, 1210654, 1227404, 1208778, 1206187, 1218811, 1208082, 1221438, 1212170, 1224469, 1212195, 1218788, 1219848, 1220727, 1213339, 1213992, 1213258, 1220808, 1211530, 1220194, 1210416, 1225097, 1227195, 1209117, 1213702, 1215554, 1214368, 1215380, 1211165, 1207406, 1227576, 1222732, 1221445, 1217432, 1224310, 1225049, 1219048, 1205929, 1208478, 1215982, 1206389	1870	93	5798	1.3669	1	0.734034	28.3862
GOTERM_BP_FAT	GO:0032504~multicellular organism reproduction	41	0.443243	0.0181663	1225420, 1210654, 1227404, 1208778, 1206187, 1218811, 1208082, 1221438, 1212170, 1224469, 1212195, 1218788, 1219848, 1220727, 1213339, 1213992, 1213258, 1220808, 1211530, 1220194, 1210416, 1225097, 1227195, 1209117, 1213702, 1215554, 1214368, 1215380, 1211165, 1207406, 1227576, 1222732, 1221445, 1217432, 1224310, 1225049, 1219048, 1205929, 1208478, 1215982, 1206389	1870	93	5798	1.3669	1	0.734034	28.3862
GOTERM_BP_FAT	GO:0048667~cell morphogenesis involved in neuron differentiation	30	0.324324	0.0190059	1226198, 1216060, 1209309, 1218336, 1205222, 1218788, 1211530, 1211960, 1218602, 1209012, 1215687, 1205666, 1205822, 1225072, 1210416, 1227490, 1207158, 1226939, 1213655, 1207899, 1218083, 1208414, 1221302, 1226707, 1215825, 1226024, 1225022, 1215726, 1212952, 1208641	1870	64	5798	1.45338	1	0.742488	29.4933
GOTERM_BP_FAT	GO:0032989~cellular component morphogenesis	49	0.52973	0.0192453	1226848, 1221355, 1209309, 1216060, 1217539, 1211829, 1208735, 1218602, 1211960, 1209012, 1205822, 1205666, 1226614, 1207158, 1208914, 1226939, 1218083, 1221302, 1214305, 1215825, 1225022, 1215726, 1206113, 1205771, 1208641, 1226198, 1206187, 1205222, 1218336, 1218788, 1213999, 1211560, 1211530, 1215687, 1221161, 1227490, 1225072, 1210416, 1213655, 1219509, 1207899, 1208414, 1226024, 1226707, 120…	1870	115	5798	1.3211	1	0.739545	29.806
GOTERM_BP_FAT	GO:0022613~ribonucleoprotein complex biogenesis	23	0.248649	0.0194059	1219011, 1219445, 1214368, 1205373, 1205405, 1224970, 1214750, 1217432, 1220145, 1209347, 1215755, 1207577, 1207399, 1225720, 1211220, 1211790, 1206231, 1216985, 1205563, 1205486, 1215200, 1208195, 1208290	1870	46	5798	1.55027	1	0.735252	30.0151
GOTERM_BP_FAT	GO:0042472~inner ear morphogenesis	19	0.205405	0.0197976	1208093, 1207158, 1210315, 1211915, 1207703, 1226939, 1208778, 1209318, 1226947, 1220230, 1212002, 1216831, 1209230, 1224299, 1216841, 1211960, 1215905, 1207657, 1225185	1870	36	5798	1.63639	1	0.735244	30.5224
GOTERM_BP_FAT	GO:0007276~gamete generation	31	0.335135	0.0207502	1225420, 1210654, 1227404, 1206187, 1218811, 1208082, 1212170, 1212195, 1218788, 1219848, 1220727, 1213339, 1213992, 1213258, 1220808, 1220194, 1227195, 1210416, 1213702, 1209117, 1214368, 1215380, 1207406, 1221445, 1217432, 1225049, 1224310, 1219048, 1205929, 1208478, 1206389	1870	67	5798	1.43458	1	0.744937	31.7419
GOTERM_BP_FAT	GO:0043543~protein amino acid acylation	11	0.118919	0.0213285	1221053, 1220520, 1214816, 1219260, 1206766, 1205574, 1225963, 1211755, 1214638, 1226983, 1211150	1870	17	5798	2.00623	1	0.747847	32.4723
GOTERM_BP_FAT	GO:0051254~positive regulation of RNA metabolic process	65	0.702703	0.0217279	1226848, 1209925, 1225323, 1210091, 1217589, 1220121, 1211448, 1209961, 1207399, 1209863, 1209012, 1222503, 1218417, 1219609, 1205822, 1225423, 1225097, 1226614, 1227314, 1210315, 1212631, 1222732, 1211933, 1227000, 1225942, 1227466, 1206926, 1214816, 1219164, 1222988, 1207285, 1213574, 1208641, 1227137, 1214011, 1224770, 1208082, 1217891, 1212364, 1218092, 1214808, 1221660, 1218475, 1211530, 120…	1870	160	5798	1.25959	1	0.747745	32.9724
GOTERM_BP_FAT	GO:0051173~positive regulation of nitrogen compound metabolic process	87	0.940541	0.0217535	1226848, 1219438, 1227404, 1209925, 1225323, 1216440, 1210091, 1217589, 1220121, 1211448, 1209961, 1207399, 1209863, 1209012, 1222503, 1219609, 1218417, 1205822, 1225423, 1225097, 1212156, 1226614, 1210357, 1227314, 1210315, 1212631, 1222732, 1211933, 1227000, 1225942, 1214816, 1227466, 1206926, 1219164, 1222988, 1207285, 1223526, 1227463, 1213574, 1217768, 1208641, 1227137, 1214011, 1224770, 120…	1870	222	5798	1.21507	1	0.741644	33.0043
GOTERM_BP_FAT	GO:0048666~neuron development	41	0.443243	0.022017	1226198, 1216060, 1209309, 1205222, 1218336, 1206128, 1218788, 1216506, 1211530, 1211960, 1218602, 1215687, 1209012, 1224825, 1205822, 1205666, 1224969, 1225072, 1210416, 1227490, 1207507, 1224106, 1207158, 1210315, 1226939, 1213655, 1207899, 1218083, 1208414, 1221302, 1210504, 1226707, 1225022, 1226024, 1215825, 1215726, 1211521, 1224857, 1212952, 1220654, 1208641	1870	94	5798	1.35236	1	0.739484	33.3322
GOTERM_BP_FAT	GO:0048839~inner ear development	22	0.237838	0.0226957	1208093, 1207158, 1210315, 1211915, 1207703, 1226939, 1208778, 1209318, 1221445, 1226947, 1212002, 1220230, 1216831, 1224325, 1209230, 1224299, 1216841, 1211960, 1215905, 1207657, 1225185, 1208858	1870	44	5798	1.55027	1	0.74392	34.1698
GOTERM_BP_FAT	GO:0032259~methylation	16	0.172973	0.0227116	1220349, 1211774, 1212278, 1207473, 1209925, 1218977, 1207041, 1215161, 1224994, 1214782, 1205405, 1207172, 1217432, 1222403, 1214004, 1213485	1870	29	5798	1.71064	1	0.737974	34.1892
GOTERM_BP_FAT	GO:0007411~axon guidance	20	0.216216	0.0231739	1226198, 1207158, 1209309, 1218336, 1207899, 1218083, 1218788, 1208414, 1225022, 1215825, 1226024, 1215726, 1218602, 1215687, 1209012, 1205666, 1225072, 1210416, 1227490, 1208641	1870	39	5798	1.59002	1	0.739024	34.7539
GOTERM_BP_FAT	GO:0006259~DNA metabolic process	86	0.92973	0.0240477	1219438, 1211212, 1214582, 1209925, 1207041, 1221934, 1210391, 1224790, 1227543, 1219934, 1209916, 1222547, 1209052, 1222403, 1205918, 1216451, 1220741, 1227195, 1211150, 1224757, 1210357, 1227300, 1226974, 1225584, 1212278, 1217526, 1220293, 1214770, 1227364, 1207406, 1223897, 1216573, 1216768, 1214967, 1223958, 1221655, 1209044, 1226809, 1209930, 1217768, 1213485, 1222987, 1219895, 1220060, 122…	1870	220	5798	1.21203	1	0.746138	35.8087
GOTERM_BP_FAT	GO:0006473~protein amino acid acetylation	10	0.108108	0.024583	1221053, 1220520, 1214816, 1219260, 1206766, 1205574, 1225963, 1214638, 1226983, 1211150	1870	15	5798	2.06702	1	0.748045	36.4469
GOTERM_BP_FAT	GO:0016573~histone acetylation	10	0.108108	0.024583	1221053, 1220520, 1214816, 1219260, 1206766, 1205574, 1225963, 1214638, 1226983, 1211150	1870	15	5798	2.06702	1	0.748045	36.4469
GOTERM_BP_FAT	GO:0050885~neuromuscular process controlling balance	10	0.108108	0.024583	1226939, 1208778, 1219360, 1225974, 1226093, 1226328, 1227490, 1210504, 1208900, 1208641	1870	15	5798	2.06702	1	0.748045	36.4469
GOTERM_BP_FAT	GO:0030163~protein catabolic process	60	0.648649	0.0249069	1226654, 1224722, 1220686, 1225466, 1227232, 1214582, 1220317, 1205694, 1213625, 1213005, 1225793, 1210672, 1212604, 1225513, 1218935, 1227479, 1217310, 1221740, 1209052, 1217255, 1225053, 1224968, 1214823, 1214928, 1221803, 1211736, 1206347, 1219468, 1227690, 1211938, 1213530, 1208378, 1205636, 1209767, 1220373, 1209371, 1226203, 1206180, 1218855, 1212823, 1215758, 1206319, 1222909, 1208655, 121…	1870	147	5798	1.26552	1	0.746906	36.8301
GOTERM_BP_FAT	GO:0048812~neuron projection morphogenesis	28	0.302703	0.0255284	1226198, 1216060, 1209309, 1218336, 1205222, 1218788, 1211530, 1218602, 1209012, 1215687, 1205666, 1205822, 1225072, 1227490, 1210416, 1207158, 1213655, 1207899, 1218083, 1208414, 1221302, 1226707, 1215825, 1226024, 1225022, 1215726, 1212952, 1208641	1870	60	5798	1.44692	1	0.749928	37.5594
GOTERM_BP_FAT	GO:0034660~ncRNA metabolic process	37	0.4	0.0256601	1218816, 1218977, 1224994, 1222105, 1220158, 1213830, 1208900, 1220145, 1219215, 1207109, 1215755, 1224824, 1218490, 1218392, 1214741, 1220664, 1208195, 1205995, 1208290, 1219011, 1226460, 1227281, 1215380, 1216101, 1217456, 1205405, 1226441, 1216720, 1224970, 1214750, 1225689, 1211220, 1206231, 1211790, 1205563, 1205486, 1205038	1870	84	5798	1.36571	1	0.746181	37.7129
GOTERM_BP_FAT	GO:0007600~sensory perception	37	0.4	0.0256601	1206642, 1207000, 1206187, 1211844, 1226173, 1226328, 1214113, 1206741, 1205746, 1210882, 1209820, 1211960, 1218624, 1209672, 1213184, 1221828, 1214700, 1224181, 1208093, 1210315, 1207703, 1226939, 1212415, 1224610, 1225974, 1209089, 1222732, 1213167, 1220525, 1225942, 1227657, 1224765, 1225185, 1221870, 1222296, 1226702, 1220654	1870	84	5798	1.36571	1	0.746181	37.7129
GOTERM_BP_FAT	GO:0034470~ncRNA processing	26	0.281081	0.0270606	1218816, 1218977, 1224994, 1220158, 1213830, 1208900, 1220145, 1219215, 1215755, 1218490, 1208195, 1205995, 1208290, 1219011, 1219445, 1226460, 1205405, 1226441, 1224970, 1214750, 1225689, 1211220, 1211790, 1206231, 1205563, 1205486	1870	55	5798	1.46571	1	0.759347	39.3234
GOTERM_BP_FAT	GO:0042471~ear morphogenesis	19	0.205405	0.0271902	1208093, 1207158, 1210315, 1211915, 1207703, 1226939, 1208778, 1209318, 1226947, 1220230, 1212002, 1216831, 1209230, 1224299, 1216841, 1211960, 1215905, 1207657, 1225185	1870	37	5798	1.59217	1	0.755685	39.4705
GOTERM_BP_FAT	GO:0006281~DNA repair	44	0.475676	0.0304608	1223586, 1214282, 1226205, 1218811, 1221934, 1226093, 1210391, 1227543, 1220230, 1217424, 1218785, 1224019, 1226960, 1219934, 1213339, 1222547, 1209052, 1217711, 1221471, 1220003, 1205645, 1219769, 1224757, 1210357, 1226974, 1212089, 1225584, 1213801, 1226484, 1217649, 1216645, 1220293, 1207406, 1214988, 1216573, 1211267, 1214967, 1216075, 1209044, 1226448, 1217768, 1209930, 1220060, 1219895	1870	104	5798	1.31176	1	0.789338	43.0713
GOTERM_BP_FAT	GO:0010604~positive regulation of macromolecule metabolic process	104	1.12432	0.0313582	1226848, 1225420, 1219438, 1227404, 1209925, 1212195, 1210091, 1217589, 1211448, 1217193, 1227190, 1218417, 1219609, 1205822, 1225423, 1226614, 1210315, 1212278, 1208958, 1222732, 1221302, 1227000, 1223526, 1209041, 1219895, 1227137, 1224770, 1211783, 1208557, 1220230, 1224981, 1218092, 1216831, 1218725, 1218475, 1205604, 1211530, 1205574, 1225177, 1226632, 1212089, 1218875, 1213984, 1207172, 121…	1870	274	5798	1.17685	1	0.794062	44.0233
GOTERM_BP_FAT	GO:0007346~regulation of mitotic cell cycle	18	0.194595	0.0319366	1207158, 1221923, 1205428, 1226093, 1208255, 1216440, 1214986, 1211267, 1216831, 1209510, 1213339, 1215440, 1222988, 1223870, 1213353, 1215755, 1225423, 1208641	1870	35	5798	1.59456	1	0.795284	44.6289
GOTERM_BP_FAT	GO:0043583~ear development	23	0.248649	0.0332665	1208093, 1207158, 1210315, 1211915, 1207703, 1226939, 1208778, 1209318, 1221445, 1226947, 1212002, 1220230, 1216831, 1224325, 1209230, 1224299, 1216841, 1211960, 1215905, 1207657, 1225185, 1208858, 1210929	1870	48	5798	1.48567	1	0.803943	45.9979
GOTERM_BP_FAT	GO:0006357~regulation of transcription from RNA polymerase II promoter	80	0.864865	0.0344841	1226848, 1209925, 1225323, 1217589, 1223885, 1214502, 1218101, 1211448, 1209961, 1207399, 1206023, 1209863, 1209012, 1222503, 1205822, 1225423, 1225097, 1226614, 1225819, 1210315, 1227550, 1212631, 1222732, 1211933, 1225942, 1209760, 1214816, 1227466, 1206926, 1219164, 1222988, 1218756, 1207285, 1213574, 1208641, 1227137, 1214011, 1224770, 1208082, 1217891, 1212364, 1224604, 1223340, 1218092, 121…	1870	206	5798	1.20409	1	0.81098	47.2233
GOTERM_BP_FAT	GO:0010608~posttranscriptional regulation of gene expression	21	0.227027	0.0349816	1219445, 1209753, 1221253, 1227685, 1226460, 1215380, 1208557, 1226441, 1218943, 1213681, 1220727, 1209916, 1210246, 1226785, 1207577, 1213900, 1226800, 1222716, 1211679, 1212247, 1208641	1870	43	5798	1.51421	1	0.811104	47.7163
GOTERM_BP_FAT	GO:0007528~neuromuscular junction development	7	0.0756757	0.0359413	1214011, 1209914, 1227007, 1218451, 1214690, 1224969, 1208641	1870	9	5798	2.41153	1	0.815357	48.6552
GOTERM_BP_FAT	GO:0006812~cation transport	99	1.07027	0.036204	1221412, 1226173, 1218742, 1220848, 1213520, 1208175, 1220451, 1220785, 1223425, 1209820, 1211656, 1213115, 1224560, 1208912, 1207051, 1222732, 1222841, 1216762, 1218899, 1227108, 1212320, 1224248, 1216633, 1221765, 1224151, 1215309, 1224981, 1224906, 1213856, 1211700, 1215300, 1205476, 1216334, 1206830, 1226345, 1215400, 1221828, 1219550, 1215619, 1205510, 1224783, 1206843, 1205899, 1222309, 120…	1870	261	5798	1.17606	1	0.813364	48.9094
GOTERM_BP_FAT	GO:0043632~modification-dependent macromolecule catabolic process	49	0.52973	0.0367486	1224722, 1220686, 1227232, 1214582, 1220317, 1205694, 1213005, 1212604, 1210672, 1225513, 1218935, 1227479, 1217310, 1221740, 1209052, 1217255, 1225053, 1224968, 1214823, 1221803, 1214928, 1211736, 1219468, 1227690, 1211938, 1213530, 1208378, 1205636, 1209767, 1220373, 1209371, 1226203, 1218855, 1215758, 1222909, 1219055, 1220349, 1220958, 1220696, 1215550, 1222207, 1211573, 1210009, 1226580, 121…	1870	119	5798	1.27669	1	0.813867	49.4326
GOTERM_BP_FAT	GO:0019941~modification-dependent protein catabolic process	49	0.52973	0.0367486	1224722, 1220686, 1227232, 1214582, 1220317, 1205694, 1213005, 1212604, 1210672, 1225513, 1218935, 1227479, 1217310, 1221740, 1209052, 1217255, 1225053, 1224968, 1214823, 1221803, 1214928, 1211736, 1219468, 1227690, 1211938, 1213530, 1208378, 1205636, 1209767, 1220373, 1209371, 1226203, 1218855, 1215758, 1222909, 1219055, 1220349, 1220958, 1220696, 1215550, 1222207, 1211573, 1210009, 1226580, 121…	1870	119	5798	1.27669	1	0.813867	49.4326
GOTERM_BP_FAT	GO:0006350~transcription	133	1.43784	0.0369622	1205105, 1208778, 1207041, 1214782, 1227604, 1210091, 1217589, 1224173, 1214502, 1227602, 1218101, 1216589, 1224963, 1224364, 1206023, 1218202, 1218417, 1227195, 1225912, 1225423, 1221394, 1214572, 1207158, 1225430, 1225584, 1221891, 1208583, 1213635, 1221309, 1205429, 1227364, 1222636, 1217289, 1213727, 1214967, 1220463, 1213304, 1206447, 1214638, 1220060, 1223020, 1210654, 1211276, 1218092, 122…	1870	360	5798	1.14548	1	0.811509	49.6365
GOTERM_BP_FAT	GO:0045216~cell-cell junction organization	6	0.0648649	0.0391557	1213442, 1225369, 1223870, 1205222, 1225423, 1225097	1870	7	5798	2.6576	1	0.825609	51.6852
GOTERM_BP_FAT	GO:0019953~sexual reproduction	35	0.378378	0.0404792	1225420, 1210654, 1227404, 1205974, 1206187, 1218811, 1208082, 1211768, 1226328, 1212170, 1212195, 1218788, 1219848, 1220727, 1213339, 1213992, 1213258, 1220808, 1220194, 1210416, 1227195, 1209117, 1213702, 1214368, 1215380, 1207406, 1221445, 1217432, 1224310, 1225049, 1219048, 1209608, 1205929, 1208478, 1206389	1870	81	5798	1.33974	1	0.83191	52.8829
GOTERM_BP_FAT	GO:0032583~regulation of gene-specific transcription	18	0.194595	0.0427978	1220349, 1227137, 1226263, 1223555, 1212631, 1211933, 1216440, 1215943, 1227630, 1217589, 1214808, 1221660, 1214816, 1222988, 1205574, 1209012, 1225097, 1221725	1870	36	5798	1.55027	1	0.844866	54.9138
GOTERM_BP_FAT	GO:0009057~macromolecule catabolic process	73	0.789189	0.0433123	1226654, 1224722, 1220686, 1214582, 1225466, 1227232, 1220317, 1213005, 1205694, 1213625, 1225793, 1210672, 1212604, 1225513, 1218935, 1227479, 1217310, 1221740, 1209052, 1217255, 1225053, 1224968, 1227301, 1214823, 1220194, 1227195, 1214928, 1221803, 1210357, 1211736, 1206347, 1226460, 1219468, 1227690, 1211938, 1213530, 1208378, 1226809, 1205636, 1209767, 1220373, 1226254, 1209753, 1209371, 122…	1870	188	5798	1.20393	1	0.844715	55.3531
GOTERM_BP_FAT	GO:0007281~germ cell development	16	0.172973	0.0442235	1209117, 1214368, 1227404, 1215380, 1206187, 1218811, 1207406, 1218788, 1212195, 1224310, 1220727, 1213339, 1220808, 1205929, 1208478, 1206389	1870	31	5798	1.60028	1	0.847225	56.1213
GOTERM_BP_FAT	GO:0044257~cellular protein catabolic process	54	0.583784	0.0487198	1224722, 1220686, 1225466, 1227232, 1214582, 1220317, 1205694, 1213625, 1213005, 1212604, 1210672, 1225513, 1218935, 1227479, 1217310, 1221740, 1209052, 1217255, 1225053, 1224968, 1214823, 1221803, 1214928, 1211736, 1219468, 1227690, 1211938, 1213530, 1208378, 1205636, 1209767, 1220373, 1209371, 1226203, 1206180, 1218855, 1215758, 1222909, 1208655, 1219055, 1220349, 1220958, 1220696, 1215550, 122…	1870	135	5798	1.24021	1	0.871142	59.7321
GOTERM_BP_FAT	GO:0055002~striated muscle cell development	11	0.118919	0.0520428	1214305, 1214011, 1208735, 1209914, 1227007, 1218451, 1213999, 1214690, 1224969, 1227490, 1208641	1870	19	5798	1.79505	1	0.885349	62.2183
GOTERM_BP_FAT	GO:0042770~DNA damage response, signal transduction	11	0.118919	0.0520428	1226848, 1210315, 1213339, 1213801, 1226448, 1225323, 1226093, 1207406, 1214988, 1211267, 1220104	1870	19	5798	1.79505	1	0.885349	62.2183
GOTERM_BP_FAT	GO:0044265~cellular macromolecule catabolic process	65	0.702703	0.0536249	1224722, 1220686, 1225466, 1227232, 1214582, 1220317, 1205694, 1213625, 1213005, 1210672, 1212604, 1225513, 1218935, 1227479, 1217310, 1221740, 1209052, 1217255, 1225053, 1224968, 1220194, 1214823, 1227195, 1214928, 1221803, 1210357, 1211736, 1226460, 1219468, 1227690, 1211938, 1213530, 1208378, 1226809, 1205636, 1209767, 1220373, 1209753, 1209371, 1226203, 1206180, 1218855, 1226960, 1215758, 121…	1870	167	5798	1.20679	1	0.889931	63.3503
GOTERM_BP_FAT	GO:0051603~proteolysis involved in cellular protein catabolic process	53	0.572973	0.0543105	1224722, 1220686, 1225466, 1227232, 1214582, 1220317, 1205694, 1213625, 1213005, 1212604, 1210672, 1225513, 1218935, 1227479, 1217310, 1221740, 1209052, 1217255, 1225053, 1224968, 1214823, 1221803, 1214928, 1211736, 1219468, 1227690, 1211938, 1213530, 1208378, 1205636, 1209767, 1220373, 1209371, 1226203, 1206180, 1218855, 1215758, 1222909, 1208655, 1219055, 1220349, 1220958, 1220696, 1215550, 122…	1870	133	5798	1.23555	1	0.890194	63.8308
GOTERM_BP_FAT	GO:0051674~localization of cell	43	0.464865	0.0552045	1225420, 1205695, 1206642, 1227404, 1224403, 1214950, 1219141, 1212195, 1218788, 1227011, 1206180, 1215464, 1218725, 1218101, 1215755, 1225099, 1218602, 1215687, 1210889, 1209012, 1222472, 1221161, 1221546, 1220194, 1220103, 1227490, 1211070, 1205039, 1220408, 1211165, 1219509, 1209087, 1224454, 1223876, 1221302, 1225977, 1219048, 1226707, 1206113, 1225068, 1222417, 1220634, 1216489	1870	105	5798	1.26974	1	0.891394	64.4485
GOTERM_BP_FAT	GO:0048870~cell motility	43	0.464865	0.0552045	1225420, 1205695, 1206642, 1227404, 1224403, 1214950, 1219141, 1212195, 1218788, 1227011, 1206180, 1215464, 1218725, 1218101, 1215755, 1225099, 1218602, 1215687, 1210889, 1209012, 1222472, 1221161, 1221546, 1220194, 1220103, 1227490, 1211070, 1205039, 1220408, 1211165, 1219509, 1209087, 1224454, 1223876, 1221302, 1225977, 1219048, 1226707, 1206113, 1225068, 1222417, 1220634, 1216489	1870	105	5798	1.26974	1	0.891394	64.4485
GOTERM_BP_FAT	GO:0015914~phospholipid transport	8	0.0864865	0.0558861	1212382, 1219988, 1225483, 1216752, 1220991, 1227657, 1224035, 1221504	1870	12	5798	2.06702	1	0.891619	64.9127
GOTERM_BP_FAT	GO:0048747~muscle fiber development	8	0.0864865	0.0558861	1214011, 1209914, 1227007, 1218451, 1214690, 1224969, 1227490, 1208641	1870	12	5798	2.06702	1	0.891619	64.9127
GOTERM_BP_FAT	GO:0048568~embryonic organ development	39	0.421622	0.0564865	1222475, 1208778, 1209925, 1208082, 1220313, 1223340, 1226947, 1220230, 1219818, 1216831, 1211448, 1209961, 1211960, 1215905, 1221725, 1216718, 1207507, 1208093, 1215554, 1207158, 1210315, 1211915, 1207703, 1226939, 1209318, 1226263, 1207899, 1212002, 1225942, 1209230, 1224299, 1216841, 1205711, 1225068, 1216887, 1207657, 1225185, 1220654, 1215809	1870	94	5798	1.28639	1	0.891484	65.3169
GOTERM_BP_FAT	GO:0007601~visual perception	21	0.227027	0.0574487	1208093, 1214700, 1224181, 1207000, 1226939, 1212415, 1211844, 1206187, 1224610, 1225974, 1213167, 1214113, 1206741, 1205746, 1220525, 1225942, 1227657, 1224765, 1218624, 1220654, 1213184	1870	45	5798	1.44692	1	0.892917	65.9554
GOTERM_BP_FAT	GO:0050953~sensory perception of light stimulus	21	0.227027	0.0574487	1208093, 1214700, 1224181, 1207000, 1226939, 1212415, 1211844, 1206187, 1224610, 1225974, 1213167, 1214113, 1206741, 1205746, 1220525, 1225942, 1227657, 1224765, 1218624, 1220654, 1213184	1870	45	5798	1.44692	1	0.892917	65.9554
GOTERM_BP_FAT	GO:0016477~cell migration	41	0.443243	0.0602422	1225420, 1205695, 1206642, 1227404, 1224403, 1214950, 1219141, 1212195, 1218788, 1227011, 1206180, 1215464, 1218101, 1218725, 1215755, 1225099, 1218602, 1215687, 1210889, 1209012, 1222472, 1221161, 1221546, 1220103, 1227490, 1211070, 1205039, 1220408, 1211165, 1219509, 1209087, 1224454, 1223876, 1221302, 1225977, 1226707, 1206113, 1225068, 1222417, 1220634, 1216489	1870	100	5798	1.27122	1	0.901713	67.7468
GOTERM_BP_FAT	GO:0030182~neuron differentiation	52	0.562162	0.0604822	1209309, 1216060, 1206128, 1216506, 1224325, 1218602, 1211960, 1224825, 1209012, 1205822, 1205666, 1224969, 1224106, 1207507, 1207158, 1210315, 1226939, 1218083, 1221445, 1221302, 1210504, 1215825, 1225022, 1215726, 1224857, 1208641, 1227137, 1226198, 1205222, 1218336, 1224289, 1218788, 1211530, 1215687, 1208858, 1221161, 1225072, 1227490, 1210416, 1226632, 1221725, 1213655, 1225974, 1207899, 120…	1870	131	5798	1.23075	1	0.900094	67.8965
GOTERM_BP_FAT	GO:0006261~DNA-dependent DNA replication	14	0.151351	0.0616118	1211212, 1217526, 1210391, 1224790, 1214770, 1227543, 1213339, 1217768, 1205918, 1210558, 1216451, 1220741, 1227300, 1210357	1870	27	5798	1.60768	1	0.901937	68.5922
GOTERM_BP_FAT	GO:0050954~sensory perception of mechanical stimulus	12	0.12973	0.062909	1208093, 1210315, 1207703, 1206642, 1210882, 1226939, 1209820, 1211960, 1225185, 1221870, 1226328, 1226702	1870	22	5798	1.6912	1	0.904331	69.3736
GOTERM_BP_FAT	GO:0030384~phosphoinositide metabolic process	12	0.12973	0.062909	1221585, 1226825, 1223065, 1207346, 1206697, 1208403, 1223439, 1212965, 1212247, 1219574, 1206731, 1212187	1870	22	5798	1.6912	1	0.904331	69.3736
GOTERM_BP_FAT	GO:0016311~dephosphorylation	34	0.367568	0.0649671	1214409, 1205084, 1217489, 1225539, 1214835, 1212621, 1222691, 1212609, 1220230, 1211633, 1224081, 1224945, 1212247, 1207487, 1205214, 1223698, 1206340, 1214326, 1227458, 1220822, 1223228, 1205752, 1208995, 1211504, 1225046, 1226604, 1226920, 1206073, 1208520, 1215743, 1217022, 1206820, 1217364, 1210728	1870	81	5798	1.30146	1	0.909299	70.5757
GOTERM_BP_FAT	GO:0051726~regulation of cell cycle	34	0.367568	0.0649671	1226848, 1220373, 1226093, 1216440, 1205743, 1216831, 1209510, 1215440, 1213339, 1213353, 1215755, 1216451, 1225423, 1220104, 1207158, 1212089, 1213801, 1221923, 1212143, 1208958, 1207899, 1205428, 1208569, 1208255, 1207406, 1214986, 1211267, 1221302, 1222988, 1223870, 1226448, 1209998, 1217768, 1208641	1870	81	5798	1.30146	1	0.909299	70.5757
GOTERM_BP_FAT	GO:0050890~cognition	44	0.475676	0.0654998	1206642, 1207000, 1227609, 1206187, 1211844, 1226173, 1226328, 1214113, 1206741, 1205746, 1216214, 1210882, 1215755, 1209820, 1211960, 1208381, 1218624, 1209672, 1213184, 1221828, 1214700, 1224181, 1208093, 1210315, 1207703, 1226939, 1212415, 1224610, 1225974, 1209089, 1222732, 1213167, 1220525, 1225942, 1224299, 1227657, 1224765, 1225185, 1221375, 1221870, 1222296, 1226702, 1220654, 1208641	1870	109	5798	1.25159	1	0.908809	70.8795
GOTERM_BP_FAT	GO:0048598~embryonic morphogenesis	57	0.616216	0.0665838	1225369, 1227404, 1208778, 1220313, 1226947, 1219831, 1211448, 1209961, 1206023, 1211960, 1225552, 1205822, 1225423, 1226614, 1216718, 1208093, 1207158, 1210315, 1207703, 1226939, 1209318, 1212631, 1221445, 1216764, 1224299, 1218756, 1222212, 1209041, 1225185, 1206447, 1226087, 1227517, 1227137, 1208082, 1223340, 1220230, 1216831, 1215687, 1215905, 1217952, 1220103, 1215554, 1219445, 1211915, 120…	1870	146	5798	1.21048	1	0.910202	71.4886
GOTERM_BP_FAT	GO:0006974~response to DNA damage stimulus	51	0.551351	0.0672853	1226848, 1219438, 1214582, 1221934, 1225323, 1210391, 1227543, 1219934, 1222547, 1209052, 1210357, 1224757, 1226974, 1210315, 1225584, 1220293, 1207406, 1216573, 1214967, 1209044, 1217768, 1209930, 1220060, 1219895, 1223586, 1214282, 1226205, 1218811, 1226093, 1220230, 1217424, 1218785, 1226960, 1224019, 1214045, 1213339, 1217711, 1221471, 1205645, 1220003, 1219769, 1220104, 1212089, 1213801, 122…	1870	129	5798	1.22579	1	0.910284	71.8763
GOTERM_BP_FAT	GO:0006417~regulation of translation	15	0.162162	0.0696317	1209753, 1227685, 1221253, 1215380, 1208557, 1218943, 1220727, 1213681, 1210246, 1226785, 1207577, 1226800, 1222716, 1211679, 1208641	1870	30	5798	1.55027	1	0.91563	73.1373
GOTERM_BP_FAT	GO:0009792~embryonic development ending in birth or egg hatching	60	0.648649	0.069904	1226654, 1219438, 1227684, 1227404, 1225466, 1222475, 1220313, 1226947, 1223700, 1222547, 1211448, 1206023, 1209012, 1216509, 1220194, 1225097, 1226614, 1216718, 1209117, 1207507, 1208093, 1225430, 1207703, 1220520, 1209318, 1227361, 1207406, 1225942, 1206926, 1206113, 1218756, 1222212, 1209041, 1211357, 1219895, 1227137, 1226093, 1224289, 1223340, 1220230, 1219818, 1216831, 1213339, 1211560, 121…	1870	155	5798	1.20021	1	0.914329	73.2801
GOTERM_BP_FAT	GO:0043009~chordate embryonic development	60	0.648649	0.069904	1226654, 1219438, 1227684, 1227404, 1225466, 1222475, 1220313, 1226947, 1223700, 1222547, 1211448, 1206023, 1209012, 1216509, 1220194, 1225097, 1226614, 1216718, 1209117, 1207507, 1208093, 1225430, 1207703, 1220520, 1209318, 1227361, 1207406, 1225942, 1206926, 1206113, 1218756, 1222212, 1209041, 1211357, 1219895, 1227137, 1226093, 1224289, 1223340, 1220230, 1219818, 1216831, 1213339, 1211560, 121…	1870	155	5798	1.20021	1	0.914329	73.2801
GOTERM_BP_FAT	GO:0030900~forebrain development	28	0.302703	0.071404	1206642, 1206187, 1208082, 1205222, 1221438, 1216831, 1227509, 1218101, 1211530, 1209012, 1224825, 1205822, 1221546, 1227490, 1226614, 1221725, 1207158, 1222732, 1209087, 1226707, 1218756, 1215726, 1216887, 1207926, 1219360, 1207657, 1208641, 1215809	1870	65	5798	1.33561	1	0.916807	74.0541
GOTERM_BP_FAT	GO:0045944~positive regulation of transcription from RNA polymerase II promoter	55	0.594595	0.0724465	1226848, 1209925, 1225323, 1217589, 1211448, 1209961, 1207399, 1209863, 1209012, 1222503, 1205822, 1225423, 1225097, 1226614, 1210315, 1222732, 1212631, 1211933, 1225942, 1227466, 1206926, 1214816, 1219164, 1222988, 1207285, 1213574, 1208641, 1227137, 1214011, 1208082, 1217891, 1212364, 1218092, 1214808, 1221660, 1218475, 1211530, 1205574, 1225177, 1226632, 1221725, 1212089, 1218875, 1226263, 120…	1870	141	5798	1.20943	1	0.917837	74.5795
GOTERM_BP_FAT	GO:0006364~rRNA processing	13	0.140541	0.0729299	1219011, 1205405, 1224970, 1214750, 1220145, 1215755, 1211220, 1206231, 1211790, 1205563, 1205486, 1208195, 1208290	1870	25	5798	1.61228	1	0.917211	74.8196
GOTERM_BP_FAT	GO:0016072~rRNA metabolic process	13	0.140541	0.0729299	1219011, 1205405, 1224970, 1214750, 1220145, 1215755, 1211220, 1206231, 1211790, 1205563, 1205486, 1208195, 1208290	1870	25	5798	1.61228	1	0.917211	74.8196
GOTERM_BP_FAT	GO:0010557~positive regulation of macromolecule biosynthetic process	84	0.908108	0.0745435	1226848, 1227404, 1209925, 1225323, 1216440, 1210091, 1217589, 1220121, 1211448, 1209961, 1207399, 1209863, 1209012, 1222503, 1219609, 1218417, 1205822, 1225423, 1225097, 1212156, 1226614, 1210357, 1227314, 1210315, 1212631, 1222732, 1211933, 1227000, 1225942, 1214816, 1227466, 1206926, 1219164, 1222988, 1207285, 1223526, 1227463, 1213574, 1217768, 1208641, 1227137, 1214011, 1224770, 1208082, 121…	1870	225	5798	1.15753	1	0.919845	75.6059
GOTERM_BP_FAT	GO:0007605~sensory perception of sound	11	0.118919	0.0748312	1208093, 1210315, 1207703, 1210882, 1226939, 1209820, 1211960, 1225185, 1221870, 1226328, 1226702	1870	20	5798	1.70529	1	0.918676	75.7437
GOTERM_BP_FAT	GO:0016445~somatic diversification of immunoglobulins	6	0.0648649	0.0770153	1209916, 1222547, 1205574, 1226093, 1207406, 1222130	1870	8	5798	2.3254	1	0.92275	76.7657
GOTERM_BP_FAT	GO:0016447~somatic recombination of immunoglobulin gene segments	6	0.0648649	0.0770153	1209916, 1222547, 1205574, 1226093, 1207406, 1222130	1870	8	5798	2.3254	1	0.92275	76.7657
GOTERM_BP_FAT	GO:0031111~negative regulation of microtubule polymerization or depolymerization	6	0.0648649	0.0770153	1210517, 1216060, 1215755, 1216348, 1206128, 1221302	1870	8	5798	2.3254	1	0.92275	76.7657
GOTERM_BP_FAT	GO:0048232~male gamete generation	19	0.205405	0.0777647	1209117, 1213702, 1210654, 1214368, 1215380, 1206187, 1208082, 1221445, 1212170, 1212195, 1224310, 1225049, 1219048, 1213339, 1213258, 1208478, 1206389, 1220194, 1227195	1870	41	5798	1.43683	1	0.922852	77.1068
GOTERM_BP_FAT	GO:0046486~glycerolipid metabolic process	19	0.205405	0.0777647	1217764, 1226825, 1208403, 1217326, 1219574, 1212187, 1206731, 1221585, 1222245, 1220733, 1223065, 1207346, 1206697, 1227108, 1223439, 1227301, 1212965, 1220194, 1212247	1870	41	5798	1.43683	1	0.922852	77.1068
GOTERM_BP_FAT	GO:0007283~spermatogenesis	19	0.205405	0.0777647	1209117, 1213702, 1210654, 1214368, 1215380, 1206187, 1208082, 1221445, 1212170, 1212195, 1224310, 1225049, 1219048, 1213339, 1213258, 1208478, 1206389, 1220194, 1227195	1870	41	5798	1.43683	1	0.922852	77.1068
GOTERM_BP_FAT	GO:0007423~sensory organ development	41	0.443243	0.0800786	1208778, 1226947, 1206741, 1220230, 1216831, 1224325, 1209961, 1206023, 1211960, 1208858, 1209012, 1215905, 1210416, 1227490, 1216202, 1215554, 1208093, 1207158, 1210315, 1211915, 1207703, 1226939, 1209318, 1225974, 1207899, 1221445, 1221302, 1212002, 1209230, 1224299, 1216841, 1216887, 1216414, 1216489, 1225185, 1207657, 1206564, 1224857, 1210929, 1220654, 1215809	1870	102	5798	1.24629	1	0.92695	78.1306
GOTERM_BP_FAT	GO:0022604~regulation of cell morphogenesis	14	0.151351	0.0821273	1205695, 1226198, 1206642, 1211165, 1222732, 1206180, 1222627, 1206113, 1227463, 1220648, 1221399, 1225072, 1227490, 1225423	1870	28	5798	1.55027	1	0.930149	79.0008
GOTERM_BP_FAT	GO:0043193~positive regulation of gene-specific transcription	14	0.151351	0.0821273	1226263, 1223555, 1212631, 1211933, 1227630, 1215943, 1217589, 1214808, 1221660, 1214816, 1222988, 1205574, 1225097, 1221725	1870	28	5798	1.55027	1	0.930149	79.0008
GOTERM_BP_FAT	GO:0031328~positive regulation of cellular biosynthetic process	86	0.92973	0.0828566	1226848, 1227404, 1209925, 1225323, 1216440, 1210091, 1217589, 1220121, 1211448, 1209961, 1207399, 1209863, 1209012, 1222503, 1219609, 1218417, 1205822, 1225423, 1225097, 1212156, 1226614, 1210357, 1227314, 1210315, 1212631, 1222732, 1211933, 1227000, 1225942, 1214816, 1227466, 1206926, 1219164, 1222988, 1207285, 1223526, 1227463, 1213574, 1217768, 1208641, 1227137, 1214011, 1224770, 1208082, 121…	1870	232	5798	1.14934	1	0.930137	79.3026
GOTERM_BP_FAT	GO:0051146~striated muscle cell differentiation	17	0.183784	0.0840506	1214011, 1218451, 1212631, 1213999, 1227630, 1214305, 1208735, 1209914, 1222988, 1227007, 1209961, 1208381, 1214690, 1224969, 1221161, 1227490, 1208641	1870	36	5798	1.46414	1	0.931197	79.7879
GOTERM_BP_FAT	GO:0051301~cell division	24	0.259459	0.0852583	1215415, 1211212, 1207630, 1208958, 1227357, 1216668, 1216348, 1208403, 1205543, 1221302, 1206180, 1220727, 1213339, 1219081, 1223526, 1211984, 1216451, 1218501, 1224048, 1205822, 1227490, 1220104, 1206567, 1220604	1870	55	5798	1.35296	1	0.932257	80.2677
GOTERM_BP_FAT	GO:0022618~ribonucleoprotein complex assembly	8	0.0864865	0.0881945	1219445, 1209347, 1214368, 1205373, 1207399, 1207577, 1225720, 1217432	1870	13	5798	1.90802	1	0.936963	81.3899
GOTERM_BP_FAT	GO:0050921~positive regulation of chemotaxis	8	0.0864865	0.0881945	1218725, 1220408, 1225466, 1209563, 1211165, 1219598, 1215687, 1210889	1870	13	5798	1.90802	1	0.936963	81.3899
GOTERM_BP_FAT	GO:0007628~adult walking behavior	8	0.0864865	0.0881945	1207703, 1226939, 1209309, 1225974, 1225323, 1226328, 1214690, 1224969	1870	13	5798	1.90802	1	0.936963	81.3899
GOTERM_BP_FAT	GO:0050920~regulation of chemotaxis	8	0.0864865	0.0881945	1218725, 1220408, 1225466, 1209563, 1211165, 1219598, 1215687, 1210889	1870	13	5798	1.90802	1	0.936963	81.3899
GOTERM_BP_FAT	GO:0022415~viral reproductive process	5	0.0540541	0.0895376	1222475, 1226171, 1211933, 1216440, 1225423	1870	6	5798	2.58378	1	0.938153	81.8829
GOTERM_BP_FAT	GO:0009891~positive regulation of biosynthetic process	86	0.92973	0.0904359	1226848, 1227404, 1209925, 1225323, 1216440, 1210091, 1217589, 1220121, 1211448, 1209961, 1207399, 1209863, 1209012, 1222503, 1219609, 1218417, 1205822, 1225423, 1225097, 1212156, 1226614, 1210357, 1227314, 1210315, 1212631, 1222732, 1211933, 1227000, 1225942, 1214816, 1227466, 1206926, 1219164, 1222988, 1207285, 1223526, 1227463, 1213574, 1217768, 1208641, 1227137, 1214011, 1224770, 1208082, 121…	1870	233	5798	1.1444	1	0.938425	82.2057
GOTERM_BP_FAT	GO:0048562~embryonic organ morphogenesis	30	0.324324	0.0913169	1208778, 1208082, 1220313, 1226947, 1223340, 1220230, 1216831, 1209961, 1211960, 1215905, 1216718, 1208093, 1215554, 1207158, 1211915, 1207703, 1210315, 1226939, 1209318, 1207899, 1212002, 1209230, 1224299, 1216841, 1205711, 1216887, 1207657, 1225185, 1220654, 1215809	1870	72	5798	1.29189	1	0.938658	82.5169
GOTERM_BP_FAT	GO:0040012~regulation of locomotion	26	0.281081	0.0930985	1207592, 1224191, 1225466, 1206187, 1219598, 1216440, 1218788, 1218725, 1209012, 1215687, 1210889, 1212247, 1220349, 1213442, 1220408, 1222826, 1209563, 1211165, 1214326, 1212631, 1221302, 1206669, 1206113, 1222988, 1225068, 1212318	1870	61	5798	1.32154	1	0.940616	83.1308
GOTERM_BP_FAT	GO:0007018~microtubule-based movement	23	0.248649	0.0978325	1214367, 1210280, 1226976, 1224200, 1217591, 1207200, 1225793, 1220266, 1218134, 1220897, 1206083, 1207223, 1210267, 1227421, 1208533, 1205800, 1210879, 1224851, 1227666, 1217663, 1226556, 1205102, 1208641	1870	53	5798	1.34552	1	0.947624	84.6644
GOTERM_BP_FAT	GO:0009953~dorsal/ventral pattern formation	16	0.172973	0.0982825	1227137, 1207158, 1208082, 1224289, 1222968, 1221302, 1216831, 1222212, 1207223, 1209041, 1216887, 1206023, 1206447, 1209012, 1207657, 1210416	1870	34	5798	1.45908	1	0.947043	84.8031
GOTERM_CC_ALL	GO:0005578~proteinaceous extracellular matrix	74	0.8	1.6763e-06	1212117, 1207592, 1213624, 1213835, 1211381, 1220811, 1217393, 1225697, 1209055, 1213314, 1216718, 1208093, 1210972, 1224714, 1209422, 1224411, 1222487, 1205631, 1218132, 1219827, 1224457, 1216861, 1227659, 1227007, 1223951, 1224394, 1221399, 1227517, 1211030, 1214011, 1213133, 1222002, 1208696, 1209450, 1224191, 1223296, 1219001, 1207024, 1225348, 1226051, 1226434, 1223614, 1216671, 1224941, 121…	1897	142	5846	1.60596	0.000904792	0.000904792	0.00244002
GOTERM_CC_ALL	GO:0031012~extracellular matrix	77	0.832432	2.12437e-06	1212117, 1207592, 1213624, 1213835, 1211381, 1220811, 1217393, 1225697, 1209055, 1213314, 1225097, 1216718, 1208093, 1210972, 1224714, 1209422, 1224411, 1222487, 1205631, 1218132, 1219827, 1224457, 1216861, 1227659, 1227007, 1223951, 1224394, 1221399, 1227517, 1211030, 1214011, 1213133, 1222002, 1208696, 1209450, 1224191, 1223296, 1219001, 1207024, 1225348, 1226051, 1226434, 1223614, 1216671, 121…	1897	150	5846	1.58194	0.0011465	0.000573415	0.00309222
GOTERM_CC_ALL	GO:0044428~nuclear part	151	1.63243	1.95485e-05	1219438, 1217489, 1225369, 1209925, 1210391, 1214782, 1206094, 1210091, 1217589, 1211448, 1217313, 1206766, 1224963, 1218490, 1216897, 1227193, 1225423, 1225912, 1227195, 1215971, 1226614, 1211150, 1225819, 1210315, 1225584, 1212278, 1205428, 1210649, 1214770, 1227364, 1213727, 1217721, 1206583, 1220568, 1206447, 1211357, 1214638, 1220060, 1214661, 1221819, 1221053, 1218816, 1221438, 1226093, 122…	1897	351	5846	1.32575	0.0105008	0.00351258	0.0284514
GOTERM_CC_ALL	GO:0005581~collagen	14	0.151351	8.23593e-05	1208093, 1222002, 1208696, 1211915, 1211160, 1222487, 1212180, 1205631, 1223554, 1220547, 1213314, 1205336, 1224394, 1216489	1897	16	5846	2.69649	0.0435013	0.0110574	0.119817
GOTERM_CC_ALL	GO:0044420~extracellular matrix part	26	0.281081	0.000437095	1222002, 1214011, 1208696, 1207592, 1224191, 1220811, 1225348, 1213314, 1214015, 1216718, 1208093, 1211915, 1211160, 1222487, 1212180, 1219509, 1205631, 1223554, 1220547, 1206669, 1227431, 1205336, 1227007, 1224394, 1216489, 1221399	1897	43	5846	1.86336	0.210285	0.0461192	0.634362
GOTERM_CC_ALL	GO:0031974~membrane-enclosed lumen	125	1.35135	0.000753216	1225369, 1210391, 1210091, 1217589, 1211448, 1217313, 1224963, 1216259, 1218490, 1224265, 1227193, 1227195, 1225912, 1225423, 1226614, 1215971, 1211150, 1225819, 1210315, 1227364, 1213727, 1206111, 1220568, 1206447, 1214638, 1220060, 1208503, 1214661, 1221053, 1218816, 1221438, 1226093, 1225963, 1224981, 1214974, 1226960, 1219215, 1218475, 1211530, 1205574, 1210558, 1224059, 1207604, 1220575, 121…	1897	302	5846	1.27554	0.334282	0.0655666	1.09081
GOTERM_CC_ALL	GO:0005887~integral to plasma membrane	71	0.767568	0.000840261	1227058, 1227404, 1209309, 1213625, 1218451, 1208062, 1214950, 1216440, 1227011, 1218458, 1214407, 1209967, 1210805, 1219886, 1225463, 1213115, 1222472, 1224106, 1213633, 1209563, 1222732, 1225718, 1221445, 1207112, 1218138, 1224299, 1206113, 1222212, 1220634, 1213106, 1208640, 1225189, 1224857, 1210929, 1221954, 1212320, 1211844, 1221765, 1208268, 1215309, 1206180, 1215953, 1215300, 1211781, 121…	1897	157	5846	1.39364	0.364874	0.0627895	1.21616
GOTERM_CC_ALL	GO:0005886~plasma membrane	261	2.82162	0.000881358	1225420, 1207043, 1227404, 1210849, 1213625, 1226173, 1221503, 1218764, 1213520, 1223425, 1225191, 1221116, 1209820, 1223429, 1213115, 1219886, 1205822, 1205959, 1225423, 1218201, 1213633, 1208912, 1206441, 1204999, 1226939, 1225718, 1218083, 1224454, 1216765, 1221302, 1225022, 1224453, 1206583, 1220634, 1211832, 1213106, 1226568, 1224857, 1225189, 1224709, 1207437, 1221438, 1210136, 1209558, 120…	1897	688	5846	1.16908	0.378825	0.0577813	1.27528
GOTERM_CC_ALL	GO:0031226~intrinsic to plasma membrane	72	0.778378	0.000909236	1227058, 1227404, 1209309, 1213625, 1218451, 1208062, 1214950, 1216440, 1227011, 1218458, 1214407, 1209967, 1210805, 1219886, 1225463, 1213115, 1222472, 1224106, 1213633, 1209563, 1222732, 1225718, 1221445, 1207112, 1218138, 1224299, 1206113, 1222212, 1220634, 1213106, 1208640, 1225189, 1224857, 1210929, 1221954, 1212320, 1211844, 1221765, 1208268, 1215309, 1219141, 1206180, 1215953, 1215300, 121…	1897	160	5846	1.38677	0.388115	0.0531163	1.31537
GOTERM_CC_ALL	GO:0005634~nucleus	506	5.47027	0.0020074	1226848, 1227684, 1227685, 1207146, 1207041, 1214782, 1213251, 1224173, 1214502, 1213258, 1206023, 1225053, 1224963, 1221119, 1218490, 1219609, 1212281, 1211150, 1226937, 1207158, 1219610, 1215243, 1225584, 1212278, 1221309, 1208958, 1227550, 1214770, 1221302, 1207941, 1214241, 1221713, 1218756, 1220161, 1212686, 1219895, 1214638, 1220060, 1213386, 1215248, 1208285, 1214661, 1221819, 1221053, 122…	1897	1419	5846	1.0989	0.662127	0.102829	2.88258
GOTERM_CC_ALL	GO:0070013~intracellular organelle lumen	119	1.28649	0.00228524	1225369, 1210391, 1210091, 1217589, 1211448, 1217313, 1224963, 1216259, 1218490, 1224265, 1227193, 1227195, 1225912, 1225423, 1226614, 1215971, 1211150, 1225819, 1210315, 1227364, 1213727, 1206111, 1220568, 1206447, 1214638, 1220060, 1208503, 1214661, 1221053, 1218816, 1221438, 1226093, 1225963, 1224981, 1214974, 1226960, 1219215, 1218475, 1211530, 1205574, 1210558, 1207604, 1224059, 1220575, 121…	1897	293	5846	1.25162	0.709294	0.106235	3.2754
GOTERM_CC_ALL	GO:0043233~organelle lumen	119	1.28649	0.00228524	1225369, 1210391, 1210091, 1217589, 1211448, 1217313, 1224963, 1216259, 1218490, 1224265, 1227193, 1227195, 1225912, 1225423, 1226614, 1215971, 1211150, 1225819, 1210315, 1227364, 1213727, 1206111, 1220568, 1206447, 1214638, 1220060, 1208503, 1214661, 1221053, 1218816, 1221438, 1226093, 1225963, 1224981, 1214974, 1226960, 1219215, 1218475, 1211530, 1205574, 1210558, 1207604, 1224059, 1220575, 121…	1897	293	5846	1.25162	0.709294	0.106235	3.2754
GOTERM_CC_ALL	GO:0044459~plasma membrane part	168	1.81622	0.00266692	1225369, 1227609, 1218411, 1227404, 1209309, 1221188, 1213625, 1226173, 1212702, 1208062, 1221503, 1214950, 1212195, 1227011, 1213520, 1206780, 1213312, 1223425, 1209820, 1219886, 1213115, 1211960, 1208381, 1205959, 1209117, 1213633, 1224106, 1208912, 1221896, 1213442, 1222846, 1210315, 1209318, 1218809, 1222732, 1225718, 1218083, 1221302, 1224453, 1206113, 1206583, 1220634, 1216360, 1213106, 122…	1897	432	5846	1.19844	0.76356	0.113232	3.81262
GOTERM_CC_ALL	GO:0015630~microtubule cytoskeleton	55	0.594595	0.00308122	1226848, 1216060, 1227113, 1206128, 1218183, 1208533, 1227503, 1227193, 1205102, 1216119, 1226976, 1219427, 1224558, 1217591, 1216668, 1220266, 1224454, 1221302, 1224310, 1210879, 1212931, 1206389, 1224851, 1218520, 1208641, 1221991, 1210798, 1227357, 1212170, 1219818, 1210517, 1221663, 1213234, 1213339, 1206083, 1215755, 1227421, 1205800, 1215714, 1227666, 1227490, 1220104, 1215415, 1218403, 121…	1897	121	5846	1.40078	0.81108	0.120311	4.39261
GOTERM_CC_ALL	GO:0005856~cytoskeleton	151	1.63243	0.00343857	1226848, 1225369, 1207146, 1220054, 1227609, 1216060, 1227113, 1205041, 1213527, 1206128, 1215625, 1218183, 1211654, 1227193, 1205102, 1221896, 1223331, 1213442, 1210315, 1219427, 1224558, 1217591, 1217495, 1221300, 1220828, 1227361, 1222732, 1220266, 1208604, 1215033, 1206771, 1224454, 1221302, 1210504, 1214305, 1206962, 1206583, 1212686, 1225438, 1216360, 1217186, 1224851, 1206389, 1213070, 120…	1897	386	5846	1.20554	0.844331	0.124411	4.89025
GOTERM_CC_ALL	GO:0005622~intracellular	1215	13.1351	0.0035281	1226848, 1227684, 1207147, 1227685, 1220054, 1207146, 1220848, 1214782, 1226171, 1213251, 1220843, 1208825, 1214502, 1208176, 1211829, 1218496, 1213258, 1221115, 1221706, 1225053, 1206023, 1221119, 1218490, 1211822, 1214373, 1212281, 1211150, 1220830, 1207158, 1205190, 1205589, 1225584, 1215380, 1212278, 1208958, 1221309, 1221300, 1214770, 1215033, 1221302, 1206962, 1225045, 1214779, 1206014, 122…	1897	3598	5846	1.04065	0.851703	0.119474	5.01454
GOTERM_CC_ALL	GO:0016585~chromatin remodeling complex	13	0.140541	0.00572592	1225584, 1215550, 1205402, 1227364, 1217589, 1214045, 1213353, 1206766, 1219975, 1221748, 1208460, 1206974, 1221531	1897	19	5846	2.10854	0.954991	0.176182	8.01891
GOTERM_CC_ALL	GO:0031981~nuclear lumen	97	1.04865	0.00616422	1225369, 1210391, 1210091, 1217589, 1211448, 1217313, 1224963, 1218490, 1227193, 1227195, 1225912, 1225423, 1226614, 1215971, 1211150, 1225819, 1210315, 1227364, 1213727, 1220568, 1206447, 1214638, 1220060, 1214661, 1221053, 1218816, 1221438, 1226093, 1225963, 1224981, 1214974, 1226960, 1219215, 1218475, 1211530, 1205574, 1207604, 1220575, 1218403, 1215415, 1212089, 1218875, 1216946, 1216645, 120…	1897	239	5846	1.25074	0.964527	0.178325	8.60735
GOTERM_CC_ALL	GO:0005623~cell	1781	19.2541	0.0101209	1226848, 1227684, 1227685, 1207147, 1220054, 1207146, 1221504, 1220848, 1221503, 1220843, 1220844, 1206954, 1214502, 1208176, 1208175, 1218496, 1221115, 1221116, 1218499, 1206023, 1221119, 1218490, 1212281, 1211150, 1220830, 1207158, 1212278, 1208958, 1220839, 1218083, 1206962, 1206014, 1221106, 1212686, 1218899, 1220060, 1224190, 1211133, 1218094, 1218092, 1206044, 1218478, 1218475, 1212657, 121…	1897	5421	5846	1.01246	0.995885	0.263004	13.7631
GOTERM_CC_ALL	GO:0044464~cell part	1781	19.2541	0.0101209	1226848, 1227684, 1227685, 1207147, 1220054, 1207146, 1221504, 1220848, 1221503, 1220843, 1220844, 1206954, 1214502, 1208176, 1208175, 1218496, 1221115, 1221116, 1218499, 1206023, 1221119, 1218490, 1212281, 1211150, 1220830, 1207158, 1212278, 1208958, 1220839, 1218083, 1206962, 1206014, 1221106, 1212686, 1218899, 1220060, 1224190, 1211133, 1218094, 1218092, 1206044, 1218478, 1218475, 1212657, 121…	1897	5421	5846	1.01246	0.995885	0.263004	13.7631
GOTERM_CC_ALL	GO:0005912~adherens junction	18	0.194595	0.0120934	1227254, 1220198, 1213442, 1225369, 1213655, 1211316, 1227295, 1214428, 1207407, 1222627, 1220936, 1209717, 1223870, 1218382, 1224988, 1225099, 1216360, 1219040	1897	32	5846	1.73346	0.998599	0.292348	16.231
GOTERM_CC_ALL	GO:0042995~cell projection	54	0.583784	0.0163835	1218282, 1225369, 1211316, 1213520, 1210091, 1222225, 1227509, 1226796, 1227472, 1209820, 1209343, 1225099, 1210889, 1205666, 1221896, 1210315, 1226939, 1211873, 1222732, 1218083, 1224454, 1221302, 1210504, 1207873, 1225022, 1211004, 1212931, 1224765, 1224857, 1208641, 1227257, 1208082, 1218336, 1212170, 1218788, 1214113, 1206180, 1219818, 1222627, 1227490, 1213655, 1222750, 1216348, 1212187, 122…	1897	127	5846	1.31033	0.999866	0.359828	21.3731
GOTERM_CC_ALL	GO:0005604~basement membrane	16	0.172973	0.0164323	1208093, 1214011, 1208696, 1224191, 1207592, 1219509, 1220811, 1206669, 1225348, 1227431, 1227007, 1224394, 1216489, 1221399, 1214015, 1216718	1897	28	5846	1.76098	0.99987	0.34692	21.4299
GOTERM_CC_ALL	GO:0070161~anchoring junction	18	0.194595	0.0175414	1227254, 1220198, 1213442, 1225369, 1213655, 1211316, 1227295, 1214428, 1207407, 1222627, 1220936, 1209717, 1223870, 1218382, 1224988, 1225099, 1216360, 1219040	1897	33	5846	1.68093	0.999929	0.352336	22.7098
GOTERM_CC_ALL	GO:0044463~cell projection part	15	0.162162	0.0191743	1210315, 1222732, 1216348, 1222750, 1218083, 1221302, 1219818, 1212187, 1227509, 1209820, 1212931, 1211004, 1224857, 1227490, 1208641	1897	26	5846	1.77791	0.999971	0.365267	24.5587
GOTERM_CC_ALL	GO:0015629~actin cytoskeleton	42	0.454054	0.0213778	1220198, 1207146, 1227113, 1227295, 1213527, 1220538, 1215625, 1213999, 1222595, 1220177, 1219818, 1206180, 1223253, 1213788, 1206601, 1222569, 1212260, 1216492, 1227490, 1211070, 1213442, 1221896, 1223331, 1215415, 1210315, 1213655, 1217495, 1218131, 1227361, 1222750, 1207407, 1208604, 1206771, 1222650, 1224472, 1214345, 1210504, 1214305, 1207220, 1219307, 1213070, 1210524	1897	96	5846	1.34825	0.999991	0.385052	26.9886
GOTERM_CC_ALL	GO:0043234~protein complex	306	3.30811	0.0232087	1227404, 1226173, 1210391, 1208403, 1213527, 1205041, 1215625, 1213520, 1217589, 1210639, 1226031, 1223425, 1220785, 1209820, 1209538, 1224963, 1213115, 1205592, 1216897, 1218490, 1211654, 1227193, 1225423, 1211150, 1221803, 1225819, 1223331, 1205190, 1208912, 1225584, 1224558, 1217591, 1207051, 1215380, 1217495, 1208958, 1220167, 1205428, 1214770, 1210649, 1220266, 1215033, 1224454, 1221302, 120…	1897	861	5846	1.09524	0.999997	0.397831	28.9519
GOTERM_CC_ALL	GO:0045177~apical part of cell	18	0.194595	0.0246986	1208912, 1227404, 1209318, 1227257, 1205222, 1220517, 1212466, 1222655, 1226947, 1224299, 1223870, 1209820, 1227472, 1212931, 1213115, 1211960, 1221399, 1208641	1897	34	5846	1.63149	0.999999	0.40513	30.5131
GOTERM_CC_ALL	GO:0044421~extracellular region part	109	1.17838	0.0291492	1225420, 1212117, 1208302, 1213624, 1213835, 1212195, 1220811, 1223885, 1217393, 1209055, 1225697, 1213314, 1225225, 1225897, 1210972, 1209422, 1205631, 1224457, 1215825, 1227007, 1223951, 1213383, 1221399, 1222002, 1213133, 1208696, 1224191, 1219001, 1207024, 1209379, 1225777, 1226434, 1215687, 1218221, 1219415, 1218379, 1210331, 1217648, 1211915, 1225621, 1217841, 1216694, 1212180, 1224162, 122…	1897	286	5846	1.1745	1	0.446586	34.9886
GOTERM_CC_ALL	GO:0005730~nucleolus	30	0.324324	0.0324465	1214661, 1211212, 1225369, 1219789, 1218977, 1210391, 1226093, 1227295, 1220145, 1205492, 1225857, 1215755, 1207399, 1222909, 1208195, 1227195, 1215971, 1220575, 1220349, 1213727, 1223871, 1224970, 1227701, 1220568, 1218382, 1216887, 1217768, 1214531, 1223146, 1205486	1897	66	5846	1.40078	1	0.470663	38.1296
GOTERM_CC_ALL	GO:0030286~dynein complex	8	0.0864865	0.0331565	1210280, 1226976, 1217591, 1227421, 1210879, 1205800, 1224851, 1220897	1897	11	5846	2.24124	1	0.466269	38.7872
GOTERM_CC_ALL	GO:0032982~myosin filament	7	0.0756757	0.0370287	1214305, 1219307, 1227295, 1215625, 1206771, 1227490, 1210524	1897	9	5846	2.39688	1	0.492962	42.2605
GOTERM_CC_ALL	GO:0016363~nuclear matrix	7	0.0756757	0.0370287	1218403, 1215415, 1207399, 1217768, 1221438, 1210391, 1227193	1897	9	5846	2.39688	1	0.492962	42.2605
GOTERM_CC_ALL	GO:0000228~nuclear chromosome	21	0.227027	0.0372611	1219438, 1218403, 1215860, 1212278, 1219190, 1210391, 1214782, 1226093, 1214770, 1217589, 1219831, 1213234, 1214816, 1206583, 1207399, 1217768, 1205574, 1214004, 1209698, 1216119, 1227300	1897	43	5846	1.50502	1	0.483906	42.4631
GOTERM_CC_ALL	GO:0045120~pronucleus	6	0.0648649	0.0401915	1223526, 1224963, 1217768, 1214782, 1227193, 1210091	1897	7	5846	2.64146	1	0.499545	44.9603
GOTERM_CC_ALL	GO:0044424~intracellular part	1024	11.0703	0.0407291	1226848, 1227684, 1207147, 1227685, 1220054, 1207146, 1220848, 1226171, 1214782, 1213251, 1208825, 1214502, 1211829, 1213258, 1221115, 1206023, 1225053, 1221119, 1218490, 1212281, 1211150, 1220830, 1207158, 1205190, 1205589, 1225584, 1215380, 1212278, 1208958, 1221309, 1221300, 1214770, 1215033, 1221302, 1206962, 1214779, 1225045, 1221713, 1220634, 1212686, 1224851, 1220060, 1224857, 1221053, 122…	1897	3058	5846	1.03194	1	0.4936	45.4074
GOTERM_CC_ALL	GO:0031941~filamentous actin	5	0.0540541	0.0409001	1210315, 1218131, 1227361, 1222750, 1210504	1897	5	5846	3.08171	1	0.484825	45.5489
GOTERM_CC_ALL	GO:0005624~membrane fraction	42	0.454054	0.0429198	1224248, 1214997, 1227609, 1226173, 1221997, 1213625, 1212702, 1221438, 1213290, 1226171, 1216440, 1216211, 1214113, 1221663, 1218725, 1211533, 1224990, 1208381, 1212260, 1212245, 1205666, 1220194, 1213702, 1215415, 1222846, 1215413, 1217764, 1213801, 1205899, 1222308, 1225781, 1222732, 1221445, 1212187, 1206962, 1208478, 1221375, 1217186, 1215200, 1211604, 1212952, 1208641	1897	100	5846	1.29432	1	0.491771	47.1944
GOTERM_CC_ALL	GO:0031225~anchored to membrane	20	0.216216	0.0434314	1205172, 1227034, 1222098, 1210849, 1212702, 1219141, 1221485, 1216661, 1210882, 1225191, 1227470, 1207071, 1226076, 1216707, 1208381, 1210889, 1207344, 1226702, 1212940, 1205959	1897	41	5846	1.50327	1	0.486262	47.6038
GOTERM_CC_ALL	GO:0005654~nucleoplasm	70	0.756757	0.0465362	1211212, 1211416, 1210391, 1210091, 1223700, 1217589, 1205492, 1211448, 1213353, 1225857, 1217313, 1224963, 1207399, 1218490, 1222503, 1221748, 1226983, 1225912, 1225423, 1211150, 1212156, 1226614, 1225819, 1224517, 1210315, 1220520, 1227364, 1225942, 1213873, 1219260, 1207285, 1213574, 1217768, 1219994, 1206447, 1220060, 1214638, 1221053, 1218816, 1225963, 1224981, 1214974, 1226960, 1219215, 121…	1897	179	5846	1.20514	1	0.501169	50.0255
GOTERM_CC_ALL	GO:0000267~cell fraction	51	0.551351	0.0499743	1214997, 1227609, 1208302, 1226173, 1213625, 1212702, 1213290, 1226171, 1216440, 1216211, 1224990, 1208381, 1219076, 1205666, 1212245, 1220194, 1216202, 1205190, 1222846, 1217764, 1225781, 1222732, 1221445, 1206962, 1208478, 1217186, 1215200, 1211604, 1208641, 1224248, 1221997, 1221438, 1220538, 1213999, 1214113, 1221663, 1218725, 1211533, 1212260, 1213702, 1215415, 1218875, 1215413, 1214368, 121…	1897	126	5846	1.24736	1	0.517378	52.5855
GOTERM_CC_ALL	GO:0005737~cytoplasm	608	6.57297	0.0536076	1226848, 1227685, 1207147, 1207043, 1226171, 1220848, 1213251, 1208825, 1216506, 1211829, 1213258, 1220785, 1226036, 1221115, 1211253, 1225053, 1224963, 1214644, 1219609, 1224968, 1221803, 1220830, 1205190, 1208912, 1226939, 1205589, 1208914, 1215380, 1212278, 1207051, 1220167, 1215033, 1221302, 1207941, 1206962, 1214779, 1225045, 1212686, 1220634, 1225185, 1219895, 1220060, 1224857, 1215248, 120…	1897	1788	5846	1.04792	1	0.533686	55.1576
GOTERM_CC_ALL	GO:0044422~organelle part	357	3.85946	0.0542307	1226848, 1210847, 1217489, 1209925, 1214782, 1220255, 1210391, 1226171, 1213527, 1205041, 1224469, 1215625, 1217589, 1216506, 1211829, 1213258, 1220785, 1221115, 1209820, 1224963, 1211253, 1216897, 1218490, 1211654, 1227193, 1226556, 1225423, 1227195, 1211150, 1225819, 1220830, 1223331, 1208912, 1225584, 1208914, 1224558, 1217591, 1212278, 1217495, 1205428, 1214770, 1210649, 1225718, 1220266, 121…	1897	1029	5846	1.06916	1	0.528914	55.5855
GOTERM_CC_ALL	GO:0044446~intracellular organelle part	354	3.82703	0.0570684	1226848, 1210847, 1217489, 1209925, 1214782, 1220255, 1210391, 1226171, 1213527, 1205041, 1224469, 1215625, 1217589, 1216506, 1211829, 1213258, 1220785, 1221115, 1209820, 1224963, 1211253, 1216897, 1218490, 1211654, 1227193, 1226556, 1225423, 1227195, 1211150, 1225819, 1220830, 1223331, 1208912, 1225584, 1208914, 1224558, 1217591, 1212278, 1217495, 1205428, 1214770, 1210649, 1225718, 1220266, 121…	1897	1021	5846	1.06849	1	0.538804	57.4863
GOTERM_CC_ALL	GO:0031253~cell projection membrane	8	0.0864865	0.0576573	1210315, 1227509, 1209820, 1216348, 1218083, 1222750, 1221302, 1212187	1897	12	5846	2.05447	1	0.533985	57.8712
GOTERM_CC_ALL	GO:0044430~cytoskeletal part	101	1.09189	0.0682613	1226848, 1216060, 1227113, 1213527, 1205041, 1206128, 1215625, 1218183, 1211654, 1227193, 1205102, 1223331, 1221896, 1210315, 1219427, 1224558, 1217591, 1217495, 1220828, 1227361, 1222732, 1220266, 1215033, 1208604, 1206771, 1224454, 1221302, 1210504, 1214305, 1206962, 1212686, 1217186, 1224851, 1206210, 1221991, 1227357, 1212170, 1206180, 1220177, 1223253, 1213234, 1213339, 1213788, 1213991, 122…	1897	272	5846	1.14431	1	0.58848	64.2694
GOTERM_CC_ALL	GO:0044454~nuclear chromosome part	18	0.194595	0.0756911	1219438, 1218403, 1212278, 1219190, 1214782, 1226093, 1210391, 1214770, 1217589, 1219831, 1214816, 1207399, 1217768, 1205574, 1214004, 1209698, 1216119, 1227300	1897	38	5846	1.45976	1	0.619388	68.2
GOTERM_CC_ALL	GO:0030055~cell-substrate junction	13	0.140541	0.0760255	1220198, 1213442, 1211316, 1227295, 1214428, 1222627, 1225348, 1211533, 1209717, 1218382, 1224988, 1219040, 1216360	1897	25	5846	1.60249	1	0.612814	68.367
GOTERM_CC_ALL	GO:0000790~nuclear chromatin	11	0.118919	0.0776616	1219831, 1214816, 1212278, 1207399, 1205574, 1219190, 1214782, 1214004, 1209698, 1217589, 1216119	1897	20	5846	1.69494	1	0.612883	69.1726
GOTERM_CC_ALL	GO:0005626~insoluble fraction	42	0.454054	0.0777601	1224248, 1214997, 1227609, 1226173, 1221997, 1213625, 1212702, 1221438, 1213290, 1226171, 1216440, 1216211, 1214113, 1221663, 1218725, 1211533, 1224990, 1208381, 1212260, 1212245, 1205666, 1220194, 1213702, 1215415, 1222846, 1215413, 1217764, 1213801, 1205899, 1222308, 1225781, 1222732, 1221445, 1212187, 1206962, 1208478, 1221375, 1217186, 1215200, 1211604, 1212952, 1208641	1897	104	5846	1.24454	1	0.605471	69.2205
GOTERM_CC_ALL	GO:0030175~filopodium	6	0.0648649	0.0788851	1210315, 1225369, 1227257, 1218382, 1223870, 1227472	1897	8	5846	2.31128	1	0.603238	69.7625
GOTERM_CC_ALL	GO:0005891~voltage-gated calcium channel complex	6	0.0648649	0.0788851	1223425, 1218450, 1227027, 1214690, 1213520, 1211879	1897	8	5846	2.31128	1	0.603238	69.7625
GOTERM_CC_ALL	GO:0005819~spindle	16	0.172973	0.0808021	1226848, 1215415, 1218403, 1224578, 1216348, 1224454, 1218183, 1213234, 1215755, 1212931, 1227503, 1227193, 1227490, 1220104, 1216119, 1208641	1897	33	5846	1.49416	1	0.604859	70.6657
GOTERM_CC_ALL	GO:0005635~nuclear envelope	20	0.216216	0.0877733	1225264, 1210315, 1217489, 1212243, 1218348, 1208720, 1221438, 1210391, 1208569, 1207678, 1210649, 1221145, 1221663, 1211379, 1224990, 1219068, 1216897, 1212891, 1227193, 1219042	1897	44	5846	1.40078	1	0.629225	73.7428
GOTERM_CC_ALL	GO:0005929~cilium	12	0.12973	0.0898999	1222225, 1225764, 1226939, 1208082, 1216887, 1211004, 1224765, 1212170, 1210091, 1214113, 1219818, 1208641	1897	23	5846	1.60785	1	0.63117	74.6198
GOTERM_CC_ALL	GO:0005859~muscle myosin complex	5	0.0540541	0.0913691	1219307, 1227295, 1215625, 1227490, 1210524	1897	6	5846	2.56809	1	0.630282	75.2097
GOTERM_CC_ALL	GO:0016460~myosin II complex	5	0.0540541	0.0913691	1219307, 1227295, 1215625, 1227490, 1210524	1897	6	5846	2.56809	1	0.630282	75.2097
GOTERM_CC_FAT	GO:0005578~proteinaceous extracellular matrix	74	0.8	4.09119e-07	1212117, 1207592, 1213624, 1213835, 1211381, 1220811, 1217393, 1225697, 1209055, 1213314, 1216718, 1208093, 1210972, 1224714, 1209422, 1224411, 1222487, 1205631, 1218132, 1219827, 1224457, 1216861, 1227659, 1227007, 1223951, 1224394, 1221399, 1227517, 1211030, 1214011, 1213133, 1222002, 1208696, 1209450, 1224191, 1223296, 1219001, 1207024, 1225348, 1226051, 1226434, 1223614, 1216671, 1224941, 121…	1202	142	3811	1.65226	0.000213537	0.000213537	0.000592713
GOTERM_CC_FAT	GO:0031012~extracellular matrix	77	0.832432	5.03264e-07	1212117, 1207592, 1213624, 1213835, 1211381, 1220811, 1217393, 1225697, 1209055, 1213314, 1225097, 1216718, 1208093, 1210972, 1224714, 1209422, 1224411, 1222487, 1205631, 1218132, 1219827, 1224457, 1216861, 1227659, 1227007, 1223951, 1224394, 1221399, 1227517, 1211030, 1214011, 1213133, 1222002, 1208696, 1209450, 1224191, 1223296, 1219001, 1207024, 1225348, 1226051, 1226434, 1223614, 1216671, 121…	1202	150	3811	1.62755	0.00026267	0.000131343	0.000729106
GOTERM_CC_FAT	GO:0005581~collagen	14	0.151351	5.79812e-05	1208093, 1222002, 1208696, 1211915, 1211160, 1222487, 1212180, 1205631, 1223554, 1220547, 1213314, 1205336, 1224394, 1216489	1202	16	3811	2.77423	0.0298136	0.0100383	0.0839679
GOTERM_CC_FAT	GO:0005886~plasma membrane	261	2.82162	6.58243e-05	1225420, 1207043, 1227404, 1210849, 1213625, 1226173, 1221503, 1218764, 1213520, 1223425, 1225191, 1221116, 1209820, 1223429, 1213115, 1219886, 1205822, 1205959, 1225423, 1218201, 1213633, 1208912, 1206441, 1204999, 1226939, 1225718, 1218083, 1224454, 1216765, 1221302, 1225022, 1224453, 1206583, 1220634, 1211832, 1213106, 1226568, 1224857, 1225189, 1224709, 1207437, 1221438, 1210136, 1209558, 120…	1202	688	3811	1.20278	0.0337778	0.00855356	0.0953211
GOTERM_CC_FAT	GO:0031974~membrane-enclosed lumen	125	1.35135	0.000166359	1225369, 1210391, 1210091, 1217589, 1211448, 1217313, 1224963, 1216259, 1218490, 1224265, 1227193, 1227195, 1225912, 1225423, 1226614, 1215971, 1211150, 1225819, 1210315, 1227364, 1213727, 1206111, 1220568, 1206447, 1214638, 1220060, 1208503, 1214661, 1221053, 1218816, 1221438, 1226093, 1225963, 1224981, 1214974, 1226960, 1219215, 1218475, 1211530, 1205574, 1210558, 1224059, 1207604, 1220575, 121…	1202	302	3811	1.31231	0.0831821	0.0172193	0.240743
GOTERM_CC_FAT	GO:0044420~extracellular matrix part	26	0.281081	0.00025854	1222002, 1214011, 1208696, 1207592, 1224191, 1220811, 1225348, 1213314, 1214015, 1216718, 1208093, 1211915, 1211160, 1222487, 1212180, 1219509, 1205631, 1223554, 1220547, 1206669, 1227431, 1205336, 1227007, 1224394, 1216489, 1221399	1202	43	3811	1.91708	0.126263	0.0222448	0.37391
GOTERM_CC_FAT	GO:0005887~integral to plasma membrane	71	0.767568	0.000306174	1227058, 1227404, 1209309, 1213625, 1218451, 1208062, 1214950, 1216440, 1227011, 1218458, 1214407, 1209967, 1210805, 1219886, 1225463, 1213115, 1222472, 1224106, 1213633, 1209563, 1222732, 1225718, 1221445, 1207112, 1218138, 1224299, 1206113, 1222212, 1220634, 1213106, 1208640, 1225189, 1224857, 1210929, 1221954, 1212320, 1211844, 1221765, 1208268, 1215309, 1206180, 1215953, 1215300, 1211781, 121…	1202	157	3811	1.43382	0.147726	0.0225766	0.442657
GOTERM_CC_FAT	GO:0031226~intrinsic to plasma membrane	72	0.778378	0.000329998	1227058, 1227404, 1209309, 1213625, 1218451, 1208062, 1214950, 1216440, 1227011, 1218458, 1214407, 1209967, 1210805, 1219886, 1225463, 1213115, 1222472, 1224106, 1213633, 1209563, 1222732, 1225718, 1221445, 1207112, 1218138, 1224299, 1206113, 1222212, 1220634, 1213106, 1208640, 1225189, 1224857, 1210929, 1221954, 1212320, 1211844, 1221765, 1208268, 1215309, 1219141, 1206180, 1215953, 1215300, 121…	1202	160	3811	1.42675	0.158263	0.0213057	0.477025
GOTERM_CC_FAT	GO:0044459~plasma membrane part	168	1.81622	0.000495283	1225369, 1227609, 1218411, 1227404, 1209309, 1221188, 1213625, 1226173, 1212702, 1208062, 1221503, 1214950, 1212195, 1227011, 1213520, 1206780, 1213312, 1223425, 1209820, 1219886, 1213115, 1211960, 1208381, 1205959, 1209117, 1213633, 1224106, 1208912, 1221896, 1213442, 1222846, 1210315, 1209318, 1218809, 1222732, 1225718, 1218083, 1221302, 1224453, 1206113, 1206583, 1220634, 1216360, 1213106, 122…	1202	432	3811	1.23299	0.227869	0.0283246	0.715153
GOTERM_CC_FAT	GO:0070013~intracellular organelle lumen	119	1.28649	0.000603361	1225369, 1210391, 1210091, 1217589, 1211448, 1217313, 1224963, 1216259, 1218490, 1224265, 1227193, 1227195, 1225912, 1225423, 1226614, 1215971, 1211150, 1225819, 1210315, 1227364, 1213727, 1206111, 1220568, 1206447, 1214638, 1220060, 1208503, 1214661, 1221053, 1218816, 1221438, 1226093, 1225963, 1224981, 1214974, 1226960, 1219215, 1218475, 1211530, 1205574, 1210558, 1207604, 1224059, 1220575, 121…	1202	293	3811	1.2877	0.270247	0.0310138	0.870576
GOTERM_CC_FAT	GO:0043233~organelle lumen	119	1.28649	0.000603361	1225369, 1210391, 1210091, 1217589, 1211448, 1217313, 1224963, 1216259, 1218490, 1224265, 1227193, 1227195, 1225912, 1225423, 1226614, 1215971, 1211150, 1225819, 1210315, 1227364, 1213727, 1206111, 1220568, 1206447, 1214638, 1220060, 1208503, 1214661, 1221053, 1218816, 1221438, 1226093, 1225963, 1224981, 1214974, 1226960, 1219215, 1218475, 1211530, 1205574, 1210558, 1207604, 1224059, 1220575, 121…	1202	293	3811	1.2877	0.270247	0.0310138	0.870576
GOTERM_CC_FAT	GO:0005856~cytoskeleton	151	1.63243	0.000752853	1226848, 1225369, 1207146, 1220054, 1227609, 1216060, 1227113, 1205041, 1213527, 1206128, 1215625, 1218183, 1211654, 1227193, 1205102, 1221896, 1223331, 1213442, 1210315, 1219427, 1224558, 1217591, 1217495, 1221300, 1220828, 1227361, 1222732, 1220266, 1208604, 1215033, 1206771, 1224454, 1221302, 1210504, 1214305, 1206962, 1206583, 1212686, 1225438, 1216360, 1217186, 1224851, 1206389, 1213070, 120…	1202	386	3811	1.24029	0.325064	0.0351086	1.08518
GOTERM_CC_FAT	GO:0015630~microtubule cytoskeleton	55	0.594595	0.00143022	1226848, 1216060, 1227113, 1206128, 1218183, 1208533, 1227503, 1227193, 1205102, 1216119, 1226976, 1219427, 1224558, 1217591, 1216668, 1220266, 1224454, 1221302, 1224310, 1210879, 1212931, 1206389, 1224851, 1218520, 1208641, 1221991, 1210798, 1227357, 1212170, 1219818, 1210517, 1221663, 1213234, 1213339, 1206083, 1215755, 1227421, 1205800, 1215714, 1227666, 1227490, 1220104, 1215415, 1218403, 121…	1202	121	3811	1.44116	0.526266	0.0603606	2.05218
GOTERM_CC_FAT	GO:0031981~nuclear lumen	97	1.04865	0.0021575	1225369, 1210391, 1210091, 1217589, 1211448, 1217313, 1224963, 1218490, 1227193, 1227195, 1225912, 1225423, 1226614, 1215971, 1211150, 1225819, 1210315, 1227364, 1213727, 1220568, 1206447, 1214638, 1220060, 1214661, 1221053, 1218816, 1221438, 1226093, 1225963, 1224981, 1214974, 1226960, 1219215, 1218475, 1211530, 1205574, 1207604, 1220575, 1218403, 1215415, 1212089, 1218875, 1216946, 1216645, 120…	1202	239	3811	1.28679	0.676137	0.0830714	3.08063
GOTERM_CC_FAT	GO:0016585~chromatin remodeling complex	13	0.140541	0.00436832	1225584, 1215550, 1205402, 1227364, 1217589, 1214045, 1213353, 1206766, 1219975, 1221748, 1208460, 1206974, 1221531	1202	19	3811	2.16932	0.898252	0.150606	6.14555
GOTERM_CC_FAT	GO:0042995~cell projection	54	0.583784	0.00866655	1218282, 1225369, 1211316, 1213520, 1210091, 1222225, 1227509, 1226796, 1227472, 1209820, 1209343, 1225099, 1210889, 1205666, 1221896, 1210315, 1226939, 1211873, 1222732, 1218083, 1224454, 1221302, 1210504, 1207873, 1225022, 1211004, 1212931, 1224765, 1224857, 1208641, 1227257, 1208082, 1218336, 1212170, 1218788, 1214113, 1206180, 1219818, 1222627, 1227490, 1213655, 1222750, 1216348, 1212187, 122…	1202	127	3811	1.34811	0.989366	0.261335	11.8477
GOTERM_CC_FAT	GO:0005912~adherens junction	18	0.194595	0.00878029	1227254, 1220198, 1213442, 1225369, 1213655, 1211316, 1227295, 1214428, 1207407, 1222627, 1220936, 1209717, 1223870, 1218382, 1224988, 1225099, 1216360, 1219040	1202	32	3811	1.78343	0.989984	0.25003	11.9942
GOTERM_CC_FAT	GO:0044421~extracellular region part	109	1.17838	0.0115218	1225420, 1212117, 1208302, 1213624, 1213835, 1212195, 1220811, 1223885, 1217393, 1209055, 1225697, 1213314, 1225225, 1225897, 1210972, 1209422, 1205631, 1224457, 1215825, 1227007, 1223951, 1213383, 1221399, 1222002, 1213133, 1208696, 1224191, 1219001, 1207024, 1209379, 1225777, 1226434, 1215687, 1218221, 1219415, 1218379, 1210331, 1217648, 1211915, 1225621, 1217841, 1216694, 1212180, 1224162, 122…	1202	286	3811	1.20836	0.99764	0.299415	15.4554
GOTERM_CC_FAT	GO:0005604~basement membrane	16	0.172973	0.0123441	1208093, 1214011, 1208696, 1224191, 1207592, 1219509, 1220811, 1206669, 1225348, 1227431, 1227007, 1224394, 1216489, 1221399, 1214015, 1216718	1202	28	3811	1.81174	0.998472	0.302467	16.4687
GOTERM_CC_FAT	GO:0015629~actin cytoskeleton	42	0.454054	0.0126674	1220198, 1207146, 1227113, 1227295, 1213527, 1220538, 1215625, 1213999, 1222595, 1220177, 1219818, 1206180, 1223253, 1213788, 1206601, 1222569, 1212260, 1216492, 1227490, 1211070, 1213442, 1221896, 1223331, 1215415, 1210315, 1213655, 1217495, 1218131, 1227361, 1222750, 1207407, 1208604, 1206771, 1222650, 1224472, 1214345, 1210504, 1214305, 1207220, 1219307, 1213070, 1210524	1202	96	3811	1.38712	0.998712	0.295484	16.864
GOTERM_CC_FAT	GO:0070161~anchoring junction	18	0.194595	0.0128923	1227254, 1220198, 1213442, 1225369, 1213655, 1211316, 1227295, 1214428, 1207407, 1222627, 1220936, 1209717, 1223870, 1218382, 1224988, 1225099, 1216360, 1219040	1202	33	3811	1.72939	0.998856	0.287288	17.1379
GOTERM_CC_FAT	GO:0044463~cell projection part	15	0.162162	0.0146508	1210315, 1222732, 1216348, 1222750, 1218083, 1221302, 1219818, 1212187, 1227509, 1209820, 1212931, 1211004, 1224857, 1227490, 1208641	1202	26	3811	1.82916	0.999549	0.307102	19.2511
GOTERM_CC_FAT	GO:0045177~apical part of cell	18	0.194595	0.0183729	1208912, 1227404, 1209318, 1227257, 1205222, 1220517, 1212466, 1222655, 1226947, 1224299, 1223870, 1209820, 1227472, 1212931, 1213115, 1211960, 1221399, 1208641	1202	34	3811	1.67853	0.999937	0.355959	23.5593
GOTERM_CC_FAT	GO:0005730~nucleolus	30	0.324324	0.0217916	1214661, 1211212, 1225369, 1219789, 1218977, 1210391, 1226093, 1227295, 1220145, 1205492, 1225857, 1215755, 1207399, 1222909, 1208195, 1227195, 1215971, 1220575, 1220349, 1213727, 1223871, 1224970, 1227701, 1220568, 1218382, 1216887, 1217768, 1214531, 1223146, 1205486	1202	66	3811	1.44116	0.99999	0.393495	27.3268
GOTERM_CC_FAT	GO:0005654~nucleoplasm	70	0.756757	0.0244855	1211212, 1211416, 1210391, 1210091, 1223700, 1217589, 1205492, 1211448, 1213353, 1225857, 1217313, 1224963, 1207399, 1218490, 1222503, 1221748, 1226983, 1225912, 1225423, 1211150, 1212156, 1226614, 1225819, 1224517, 1210315, 1220520, 1227364, 1225942, 1213873, 1219260, 1207285, 1213574, 1217768, 1219994, 1206447, 1220060, 1214638, 1221053, 1218816, 1225963, 1224981, 1214974, 1226960, 1219215, 121…	1202	179	3811	1.23988	0.999998	0.416778	30.1731
GOTERM_CC_FAT	GO:0005624~membrane fraction	42	0.454054	0.0267849	1224248, 1214997, 1227609, 1226173, 1221997, 1213625, 1212702, 1221438, 1213290, 1226171, 1216440, 1216211, 1214113, 1221663, 1218725, 1211533, 1224990, 1208381, 1212260, 1212245, 1205666, 1220194, 1213702, 1215415, 1222846, 1215413, 1217764, 1213801, 1205899, 1222308, 1225781, 1222732, 1221445, 1212187, 1206962, 1208478, 1221375, 1217186, 1215200, 1211604, 1212952, 1208641	1202	100	3811	1.33163	0.999999	0.432715	32.52
GOTERM_CC_FAT	GO:0000228~nuclear chromosome	21	0.227027	0.02733	1219438, 1218403, 1215860, 1212278, 1219190, 1210391, 1214782, 1226093, 1214770, 1217589, 1219831, 1213234, 1214816, 1206583, 1207399, 1217768, 1205574, 1214004, 1209698, 1216119, 1227300	1202	43	3811	1.54841	0.999999	0.426696	33.0656
GOTERM_CC_FAT	GO:0030286~dynein complex	8	0.0864865	0.0282471	1210280, 1226976, 1217591, 1227421, 1210879, 1205800, 1224851, 1220897	1202	11	3811	2.30585	1	0.425338	33.9741
GOTERM_CC_FAT	GO:0000267~cell fraction	51	0.551351	0.0297464	1214997, 1227609, 1208302, 1226173, 1213625, 1212702, 1213290, 1226171, 1216440, 1216211, 1224990, 1208381, 1219076, 1205666, 1212245, 1220194, 1216202, 1205190, 1222846, 1217764, 1225781, 1222732, 1221445, 1206962, 1208478, 1217186, 1215200, 1211604, 1208641, 1224248, 1221997, 1221438, 1220538, 1213999, 1214113, 1221663, 1218725, 1211533, 1212260, 1213702, 1215415, 1218875, 1215413, 1214368, 121…	1202	126	3811	1.28332	1	0.430487	35.4347
GOTERM_CC_FAT	GO:0044430~cytoskeletal part	101	1.09189	0.0321065	1226848, 1216060, 1227113, 1213527, 1205041, 1206128, 1215625, 1218183, 1211654, 1227193, 1205102, 1223331, 1221896, 1210315, 1219427, 1224558, 1217591, 1217495, 1220828, 1227361, 1222732, 1220266, 1215033, 1208604, 1206771, 1224454, 1221302, 1210504, 1214305, 1206962, 1212686, 1217186, 1224851, 1206210, 1221991, 1227357, 1212170, 1206180, 1220177, 1223253, 1213234, 1213339, 1213788, 1213991, 122…	1202	272	3811	1.1773	1	0.444228	37.6731
GOTERM_CC_FAT	GO:0016363~nuclear matrix	7	0.0756757	0.0321097	1218403, 1215415, 1207399, 1217768, 1221438, 1210391, 1227193	1202	9	3811	2.46598	1	0.433271	37.676
GOTERM_CC_FAT	GO:0032982~myosin filament	7	0.0756757	0.0321097	1214305, 1219307, 1227295, 1215625, 1206771, 1227490, 1210524	1202	9	3811	2.46598	1	0.433271	37.676
GOTERM_CC_FAT	GO:0031225~anchored to membrane	20	0.216216	0.0323863	1205172, 1227034, 1222098, 1210849, 1212702, 1219141, 1221485, 1216661, 1210882, 1225191, 1227470, 1207071, 1226076, 1216707, 1208381, 1210889, 1207344, 1226702, 1212940, 1205959	1202	41	3811	1.54661	1	0.425566	37.9336
GOTERM_CC_FAT	GO:0045120~pronucleus	6	0.0648649	0.0354858	1223526, 1224963, 1217768, 1214782, 1227193, 1210091	1202	7	3811	2.71761	1	0.44533	40.7525
GOTERM_CC_FAT	GO:0031941~filamentous actin	5	0.0540541	0.0367848	1210315, 1218131, 1227361, 1222750, 1210504	1202	5	3811	3.17055	1	0.447245	41.8981
GOTERM_CC_FAT	GO:0031253~cell projection membrane	8	0.0864865	0.0496482	1210315, 1227509, 1209820, 1216348, 1218083, 1222750, 1221302, 1212187	1202	12	3811	2.1137	1	0.542427	52.1812
GOTERM_CC_FAT	GO:0005626~insoluble fraction	42	0.454054	0.0510185	1224248, 1214997, 1227609, 1226173, 1221997, 1213625, 1212702, 1221438, 1213290, 1226171, 1216440, 1216211, 1214113, 1221663, 1218725, 1211533, 1224990, 1208381, 1212260, 1212245, 1205666, 1220194, 1213702, 1215415, 1222846, 1215413, 1217764, 1213801, 1205899, 1222308, 1225781, 1222732, 1221445, 1212187, 1206962, 1208478, 1221375, 1217186, 1215200, 1211604, 1212952, 1208641	1202	104	3811	1.28041	1	0.542052	53.1705
GOTERM_CC_FAT	GO:0044454~nuclear chromosome part	18	0.194595	0.0589945	1219438, 1218403, 1212278, 1219190, 1214782, 1226093, 1210391, 1214770, 1217589, 1219831, 1214816, 1207399, 1217768, 1205574, 1214004, 1209698, 1216119, 1227300	1202	38	3811	1.50184	1	0.585918	58.5605
GOTERM_CC_FAT	GO:0043228~non-membrane-bounded organelle	234	2.52973	0.0601213	1226848, 1220054, 1207146, 1208304, 1210391, 1214782, 1213527, 1205041, 1215625, 1217589, 1211654, 1227193, 1227195, 1223331, 1224558, 1215380, 1212278, 1217591, 1217495, 1221300, 1214770, 1220266, 1215033, 1224454, 1221302, 1207941, 1206962, 1206583, 1220568, 1212686, 1225438, 1217186, 1224851, 1214638, 1219895, 1214661, 1220177, 1206180, 1211272, 1211533, 1213234, 1218478, 1213788, 1205800, 120…	1202	683	3811	1.08625	1	0.58304	59.2736
GOTERM_CC_FAT	GO:0043232~intracellular non-membrane-bounded organelle	234	2.52973	0.0601213	1226848, 1220054, 1207146, 1208304, 1210391, 1214782, 1213527, 1205041, 1215625, 1217589, 1211654, 1227193, 1227195, 1223331, 1224558, 1215380, 1212278, 1217591, 1217495, 1221300, 1214770, 1220266, 1215033, 1224454, 1221302, 1207941, 1206962, 1206583, 1220568, 1212686, 1225438, 1217186, 1224851, 1214638, 1219895, 1214661, 1220177, 1206180, 1211272, 1211533, 1213234, 1218478, 1213788, 1205800, 120…	1202	683	3811	1.08625	1	0.58304	59.2736
GOTERM_CC_FAT	GO:0030055~cell-substrate junction	13	0.140541	0.0621656	1220198, 1213442, 1211316, 1227295, 1214428, 1222627, 1225348, 1211533, 1209717, 1218382, 1224988, 1219040, 1216360	1202	25	3811	1.64869	1	0.585903	60.5383
GOTERM_CC_FAT	GO:0005819~spindle	16	0.172973	0.0643231	1226848, 1215415, 1218403, 1224578, 1216348, 1224454, 1218183, 1213234, 1215755, 1212931, 1227503, 1227193, 1227490, 1220104, 1216119, 1208641	1202	33	3811	1.53724	1	0.589294	61.8333
GOTERM_CC_FAT	GO:0000790~nuclear chromatin	11	0.118919	0.0649282	1219831, 1214816, 1212278, 1207399, 1205574, 1219190, 1214782, 1214004, 1209698, 1217589, 1216119	1202	20	3811	1.7438	1	0.583585	62.1894
GOTERM_CC_FAT	GO:0044451~nucleoplasm part	61	0.659459	0.0658205	1211416, 1210091, 1223700, 1217589, 1211448, 1213353, 1217313, 1224963, 1207399, 1218490, 1222503, 1221748, 1226983, 1225912, 1225423, 1211150, 1226614, 1225819, 1224517, 1210315, 1220520, 1227364, 1225942, 1213873, 1219260, 1207285, 1213574, 1217768, 1206447, 1214638, 1221053, 1218816, 1225963, 1224981, 1214974, 1226960, 1219215, 1211530, 1205574, 1207604, 1206974, 1207467, 1212089, 1218875, 121…	1202	161	3811	1.20126	1	0.579731	62.7088
GOTERM_CC_FAT	GO:0005635~nuclear envelope	20	0.216216	0.0677623	1225264, 1210315, 1217489, 1212243, 1218348, 1208720, 1221438, 1210391, 1208569, 1207678, 1210649, 1221145, 1221663, 1211379, 1224990, 1219068, 1216897, 1212891, 1227193, 1219042	1202	44	3811	1.44116	1	0.58192	63.8161
GOTERM_CC_FAT	GO:0030175~filopodium	6	0.0648649	0.0703569	1210315, 1225369, 1227257, 1218382, 1223870, 1227472	1202	8	3811	2.37791	1	0.587548	65.2481
GOTERM_CC_FAT	GO:0005891~voltage-gated calcium channel complex	6	0.0648649	0.0703569	1223425, 1218450, 1227027, 1214690, 1213520, 1211879	1202	8	3811	2.37791	1	0.587548	65.2481
GOTERM_CC_FAT	GO:0005929~cilium	12	0.12973	0.0747276	1222225, 1225764, 1226939, 1208082, 1216887, 1211004, 1224765, 1212170, 1210091, 1214113, 1219818, 1208641	1202	23	3811	1.6542	1	0.602044	67.5415
GOTERM_CC_FAT	GO:0016459~myosin complex	23	0.248649	0.0787437	1223331, 1210315, 1217495, 1218131, 1222750, 1227295, 1213527, 1215625, 1220538, 1206771, 1222650, 1220177, 1206180, 1214345, 1224472, 1223253, 1214305, 1213788, 1207220, 1222569, 1219307, 1210524, 1227490	1202	53	3811	1.3759	1	0.613799	69.5239
GOTERM_CC_FAT	GO:0009898~internal side of plasma membrane	19	0.205405	0.0795685	1209117, 1213442, 1222846, 1227609, 1213655, 1218411, 1211316, 1227257, 1216800, 1214428, 1222910, 1220525, 1211533, 1224453, 1209914, 1223870, 1208381, 1220654, 1205959	1202	42	3811	1.4343	1	0.609715	69.9168
GOTERM_CC_FAT	GO:0016460~myosin II complex	5	0.0540541	0.0829795	1219307, 1227295, 1215625, 1227490, 1210524	1202	6	3811	2.64212	1	0.617908	71.4922
GOTERM_CC_FAT	GO:0005859~muscle myosin complex	5	0.0540541	0.0829795	1219307, 1227295, 1215625, 1227490, 1210524	1202	6	3811	2.64212	1	0.617908	71.4922
GOTERM_CC_FAT	GO:0030141~secretory granule	11	0.118919	0.0900678	1217153, 1223742, 1209916, 1213339, 1222475, 1225621, 1214805, 1207051, 1221438, 1208478, 1214741	1202	21	3811	1.66076	1	0.641719	74.5235
GOTERM_CC_FAT	GO:0005813~centrosome	18	0.194595	0.0934179	1221991, 1210798, 1213801, 1224578, 1227357, 1216668, 1212170, 1217326, 1224454, 1218183, 1221663, 1213339, 1212931, 1215714, 1227666, 1225395, 1218520, 1220104	1202	40	3811	1.42675	1	0.648232	75.8491
GOTERM_CC_FAT	GO:0000922~spindle pole	9	0.0972973	0.0953489	1226848, 1218403, 1213234, 1215755, 1212931, 1227503, 1227193, 1224454, 1220104	1202	16	3811	1.78343	1	0.648712	76.5838
GOTERM_CC_FAT	GO:0005643~nuclear pore	9	0.0972973	0.0953489	1225264, 1212243, 1208720, 1216897, 1208569, 1210649, 1207678, 1219042, 1221145	1202	16	3811	1.78343	1	0.648712	76.5838
GOTERM_CC_FAT	GO:0046930~pore complex	9	0.0972973	0.0953489	1225264, 1212243, 1208720, 1216897, 1208569, 1210649, 1207678, 1219042, 1221145	1202	16	3811	1.78343	1	0.648712	76.5838
GOTERM_CC_FAT	GO:0000118~histone deacetylase complex	7	0.0756757	0.0963006	1213353, 1205402, 1227364, 1221748, 1217589, 1221531, 1206974	1202	11	3811	2.01762	1	0.645274	76.9382
GOTERM_MF_ALL	GO:0005515~protein binding	1017	10.9946	1.9479e-09	1226848, 1227684, 1220054, 1207146, 1227404, 1226173, 1220848, 1226171, 1221503, 1214782, 1214784, 1213251, 1220843, 1206954, 1214502, 1213258, 1220648, 1206023, 1214376, 1211150, 1205190, 1225584, 1215380, 1226184, 1212278, 1207803, 1208958, 1218083, 1214770, 1207547, 1221302, 1206297, 1206962, 1220634, 1220060, 1208189, 1224857, 1224055, 1211133, 1221053, 1215370, 1226195, 1224191, 1225575, 122…	2640	2743	8067	1.13293	2.38812e-06	2.38812e-06	3.1575e-06
GOTERM_MF_ALL	GO:0005488~binding	2018	21.8162	4.52848e-09	1226848, 1227684, 1227685, 1220054, 1207146, 1220057, 1221504, 1220848, 1221503, 1220843, 1206954, 1214502, 1208176, 1221116, 1206023, 1221119, 1218494, 1212281, 1211150, 1218492, 1207158, 1212278, 1208958, 1218083, 1207547, 1226838, 1206017, 1206962, 1206014, 1221106, 1208189, 1220060, 1224190, 1226821, 1211133, 1224191, 1226825, 1218094, 1218092, 1207573, 1218475, 1218473, 1207577, 1214909, 120…	2640	5836	8067	1.05661	5.5519e-06	2.77595e-06	7.34057e-06
GOTERM_MF_ALL	GO:0032559~adenyl ribonucleotide binding	354	3.82703	7.65984e-09	1226848, 1225595, 1220356, 1227404, 1224035, 1221504, 1213255, 1209254, 1213527, 1215625, 1220256, 1212382, 1210576, 1216752, 1224462, 1222069, 1213258, 1219886, 1223331, 1215244, 1217591, 1214770, 1220266, 1226838, 1224454, 1221406, 1223958, 1210588, 1225045, 1227185, 1209044, 1223435, 1211549, 1220779, 1224851, 1208189, 1205587, 1219616, 1224857, 1225189, 1225588, 1225435, 1224057, 1215608, 120…	2640	850	8067	1.2726	9.39091e-06	3.13031e-06	1.24164e-05
GOTERM_MF_ALL	GO:0005524~ATP binding	351	3.79459	1.27804e-08	1226848, 1225595, 1220356, 1227404, 1224035, 1221504, 1213255, 1209254, 1213527, 1215625, 1220256, 1212382, 1210576, 1216752, 1224462, 1222069, 1213258, 1219886, 1223331, 1215244, 1217591, 1214770, 1220266, 1226838, 1224454, 1221406, 1223958, 1210588, 1225045, 1227185, 1209044, 1223435, 1211549, 1220779, 1224851, 1208189, 1205587, 1219616, 1224857, 1225189, 1225588, 1225435, 1224057, 1215608, 120…	2640	845	8067	1.26928	1.56687e-05	3.91719e-06	2.07168e-05
GOTERM_MF_ALL	GO:0030554~adenyl nucleotide binding	366	3.95676	7.31007e-08	1226848, 1225595, 1220356, 1227404, 1224035, 1221504, 1213255, 1209254, 1213527, 1215625, 1220158, 1220256, 1212382, 1210576, 1216752, 1224462, 1222069, 1213258, 1219886, 1223331, 1215244, 1217591, 1214770, 1220266, 1226838, 1224454, 1221406, 1223958, 1225689, 1210588, 1225045, 1227185, 1209044, 1223435, 1211549, 1220779, 1224851, 1208189, 1205587, 1219616, 1224857, 1225189, 1225588, 1225435, 122…	2640	898	8067	1.24541	8.96175e-05	1.79241e-05	0.000118495
GOTERM_MF_ALL	GO:0001883~purine nucleoside binding	367	3.96757	1.1632e-07	1226848, 1225595, 1220356, 1227404, 1224035, 1221504, 1213255, 1209254, 1213527, 1215625, 1220158, 1220256, 1212382, 1210576, 1216752, 1224462, 1222069, 1213258, 1219886, 1223331, 1215244, 1217591, 1214770, 1220266, 1226838, 1224454, 1221406, 1223958, 1225689, 1210588, 1225045, 1227185, 1209044, 1223435, 1211549, 1220779, 1224851, 1208189, 1205587, 1219616, 1224857, 1225189, 1225588, 1225435, 122…	2640	904	8067	1.24053	0.000142598	2.37678e-05	0.000188552
GOTERM_MF_ALL	GO:0001882~nucleoside binding	369	3.98919	1.25524e-07	1226848, 1225595, 1220356, 1227404, 1224035, 1221504, 1213255, 1209254, 1210391, 1213527, 1215625, 1220158, 1220256, 1212382, 1210576, 1216752, 1224462, 1222069, 1213258, 1219886, 1223331, 1215244, 1217591, 1214770, 1220266, 1226838, 1224454, 1221406, 1223958, 1225689, 1210588, 1225045, 1227185, 1209044, 1223435, 1211549, 1220779, 1224851, 1208189, 1205587, 1219616, 1224857, 1225189, 1225588, 122…	2640	910	8067	1.23906	0.000153881	2.19845e-05	0.000203472
GOTERM_MF_ALL	GO:0032553~ribonucleotide binding	414	4.47568	1.4e-06	1226848, 1225595, 1227404, 1224035, 1221504, 1213255, 1212382, 1213258, 1222069, 1219886, 1215244, 1208914, 1214770, 1221406, 1226838, 1206962, 1225045, 1220779, 1224851, 1208189, 1205587, 1224857, 1219616, 1225189, 1225588, 1224190, 1221819, 1224057, 1224151, 1206180, 1224981, 1220177, 1218785, 1205165, 1211272, 1205472, 1213234, 1227666, 1220664, 1224059, 1214367, 1205075, 1224060, 1219734, 120…	2640	1055	8067	1.1991	0.00171493	0.000214527	0.00226934
GOTERM_MF_ALL	GO:0032555~purine ribonucleotide binding	414	4.47568	1.4e-06	1226848, 1225595, 1227404, 1224035, 1221504, 1213255, 1212382, 1213258, 1222069, 1219886, 1215244, 1208914, 1214770, 1221406, 1226838, 1206962, 1225045, 1220779, 1224851, 1208189, 1205587, 1224857, 1219616, 1225189, 1225588, 1224190, 1221819, 1224057, 1224151, 1206180, 1224981, 1220177, 1218785, 1205165, 1211272, 1205472, 1213234, 1227666, 1220664, 1224059, 1214367, 1205075, 1224060, 1219734, 120…	2640	1055	8067	1.1991	0.00171493	0.000214527	0.00226934
GOTERM_MF_ALL	GO:0016787~hydrolase activity	472	5.1027	1.81903e-06	1225595, 1213112, 1224035, 1221504, 1213251, 1207952, 1207956, 1212382, 1220781, 1211829, 1225053, 1218490, 1207449, 1208914, 1220976, 1207051, 1224044, 1225580, 1224189, 1227690, 1226838, 1221406, 1225046, 1220779, 1224851, 1206820, 1205587, 1219616, 1225588, 1221819, 1213133, 1224057, 1212790, 1208945, 1206932, 1224151, 1207024, 1220177, 1206180, 1222085, 1218785, 1226960, 1211709, 1227666, 121…	2640	1222	8067	1.18026	0.00222765	0.000247762	0.00294858
GOTERM_MF_ALL	GO:0000166~nucleotide binding	499	5.39459	3.0168e-06	1226848, 1225595, 1221413, 1227685, 1227404, 1224035, 1213255, 1221504, 1220158, 1212382, 1222069, 1213258, 1219886, 1215244, 1208914, 1214770, 1226838, 1221406, 1225689, 1206962, 1225045, 1220779, 1224851, 1208189, 1205587, 1224857, 1219616, 1225189, 1225588, 1224190, 1221819, 1224057, 1224151, 1220177, 1206180, 1224981, 1218785, 1205165, 1211272, 1205472, 1213234, 1214252, 1214909, 1213900, 122…	2640	1304	8067	1.16931	0.00369177	0.000369792	0.00489006
GOTERM_MF_ALL	GO:0017076~purine nucleotide binding	426	4.60541	8.49104e-06	1226848, 1225595, 1227404, 1224035, 1221504, 1213255, 1220158, 1212382, 1213258, 1222069, 1219886, 1215244, 1208914, 1214770, 1221406, 1226838, 1225689, 1206962, 1225045, 1220779, 1224851, 1208189, 1205587, 1224857, 1219616, 1225189, 1225588, 1224190, 1221819, 1224057, 1224151, 1220177, 1206180, 1224981, 1218785, 1205165, 1211272, 1205472, 1213234, 1227666, 1218375, 1220664, 1224059, 1214367, 120…	2640	1105	8067	1.17803	0.0103561	0.000945922	0.0137629
GOTERM_MF_ALL	GO:0030695~GTPase regulator activity	80	0.864865	1.80424e-05	1216993, 1225265, 1226272, 1207147, 1223234, 1208577, 1218935, 1213668, 1216444, 1220985, 1226794, 1208011, 1215464, 1217733, 1218041, 1212385, 1207295, 1205829, 1223429, 1209195, 1214850, 1218494, 1226982, 1215244, 1209281, 1205017, 1211779, 1222111, 1209142, 1216015, 1209972, 1225475, 1216360, 1225371, 1217790, 1211691, 1227311, 1223115, 1211133, 1225446, 1224403, 1223687, 1208081, 1209516, 122…	2640	163	8067	1.49972	0.0218774	0.00184166	0.0292424
GOTERM_MF_ALL	GO:0060589~nucleoside-triphosphatase regulator activity	82	0.886486	1.80769e-05	1216993, 1225265, 1226272, 1207147, 1223234, 1208577, 1218935, 1213668, 1216444, 1220985, 1226794, 1208011, 1215464, 1217733, 1218041, 1212385, 1207295, 1205829, 1223429, 1209195, 1214850, 1218494, 1226982, 1215244, 1209281, 1205017, 1211779, 1222111, 1214305, 1209142, 1210585, 1216015, 1209972, 1225475, 1216360, 1225371, 1217790, 1211691, 1227311, 1223115, 1211133, 1225446, 1224403, 1223687, 120…	2640	168	8067	1.49146	0.0219187	0.00170336	0.0292983
GOTERM_MF_ALL	GO:0005201~extracellular matrix structural constituent	17	0.183784	1.87564e-05	1208093, 1222002, 1208696, 1211915, 1211160, 1222487, 1212180, 1219509, 1205631, 1223554, 1220547, 1217393, 1213314, 1205336, 1224394, 1216489, 1225414	2640	20	8067	2.59733	0.0227331	0.00164119	0.0303993
GOTERM_MF_ALL	GO:0017111~nucleoside-triphosphatase activity	167	1.80541	2.27731e-05	1225595, 1224035, 1221504, 1213739, 1213527, 1225793, 1215625, 1205243, 1216068, 1212382, 1212309, 1216752, 1211829, 1213316, 1209820, 1215832, 1208381, 1227119, 1222269, 1224265, 1214850, 1216452, 1205102, 1224758, 1208383, 1223331, 1210315, 1208914, 1224102, 1217591, 1217495, 1227364, 1220266, 1216167, 1221406, 1224454, 1226838, 1222394, 1210504, 1223958, 1210588, 1216762, 1223435, 1220779, 122…	2640	391	8067	1.30511	0.027534	0.00185961	0.0369083
GOTERM_MF_ALL	GO:0016462~pyrophosphatase activity	168	1.81622	2.8402e-05	1225595, 1224035, 1221504, 1213739, 1213527, 1225793, 1215625, 1205243, 1216068, 1212382, 1212309, 1216752, 1211829, 1213316, 1209820, 1215832, 1208381, 1227119, 1222269, 1224265, 1214850, 1216452, 1205102, 1224758, 1208383, 1223331, 1210315, 1208914, 1224102, 1217591, 1217495, 1227364, 1220266, 1216167, 1221406, 1224454, 1226838, 1222394, 1210504, 1223958, 1210588, 1216762, 1223435, 1220779, 122…	2640	395	8067	1.29963	0.034222	0.00217396	0.0460291
GOTERM_MF_ALL	GO:0016818~hydrolase activity, acting on acid anhydrides, in phosphorus-containing anhydrides	169	1.82703	3.52473e-05	1225595, 1224035, 1221504, 1213739, 1213527, 1225793, 1215625, 1205243, 1216068, 1212382, 1212309, 1216752, 1211829, 1213316, 1209820, 1215832, 1208381, 1227119, 1222269, 1224265, 1214850, 1216452, 1205102, 1224758, 1208383, 1223331, 1210315, 1208914, 1224102, 1217591, 1217495, 1227364, 1220266, 1216167, 1226838, 1221406, 1224454, 1222394, 1210504, 1223958, 1210588, 1216762, 1223435, 1220779, 122…	2640	399	8067	1.29426	0.0422936	0.00253877	0.0571199
GOTERM_MF_ALL	GO:0016817~hydrolase activity, acting on acid anhydrides	169	1.82703	5.72448e-05	1225595, 1224035, 1221504, 1213739, 1213527, 1225793, 1215625, 1205243, 1216068, 1212382, 1212309, 1216752, 1211829, 1213316, 1209820, 1215832, 1208381, 1227119, 1222269, 1224265, 1214850, 1216452, 1205102, 1224758, 1208383, 1223331, 1210315, 1208914, 1224102, 1217591, 1217495, 1227364, 1220266, 1216167, 1226838, 1221406, 1224454, 1222394, 1210504, 1223958, 1210588, 1216762, 1223435, 1220779, 122…	2640	402	8067	1.2846	0.0677779	0.00389153	0.0927523
GOTERM_MF_ALL	GO:0004714~transmembrane receptor protein tyrosine kinase activity	32	0.345946	0.000155565	1222475, 1209309, 1218451, 1208062, 1208268, 1216440, 1212195, 1210805, 1225957, 1219886, 1222472, 1213587, 1224302, 1227524, 1208074, 1205075, 1210950, 1211165, 1225642, 1219734, 1225781, 1208414, 1207112, 1218138, 1226024, 1214479, 1206800, 1210929, 1224857, 1212952, 1225189, 1211062	2640	54	8067	1.81077	0.173651	0.00998862	0.25187
GOTERM_MF_ALL	GO:0042578~phosphoric ester hydrolase activity	81	0.875676	0.00015805	1218592, 1212191, 1214409, 1205084, 1217489, 1217483, 1221934, 1213290, 1211588, 1215166, 1207952, 1212609, 1213411, 1220808, 1206767, 1227470, 1217095, 1225758, 1212247, 1207252, 1207487, 1207449, 1214700, 1205214, 1206340, 1211778, 1224189, 1223912, 1227458, 1214967, 1220822, 1223228, 1220525, 1208995, 1211504, 1225046, 1214815, 1221753, 1206820, 1224148, 1225085, 1207641, 1225539, 1223190, 122…	2640	174	8067	1.42247	0.176164	0.00964243	0.255888
GOTERM_MF_ALL	GO:0043169~cation binding	633	6.84324	0.000159186	1207146, 1227404, 1224035, 1207041, 1226173, 1221504, 1216308, 1218764, 1208825, 1220843, 1227543, 1214502, 1216506, 1208176, 1207956, 1212382, 1220649, 1213925, 1213258, 1226036, 1221706, 1221116, 1205592, 1213115, 1221119, 1211822, 1218494, 1218492, 1221803, 1211150, 1226939, 1212278, 1207056, 1205449, 1207547, 1211248, 1224955, 1225992, 1206014, 1221719, 1211832, 1215137, 1219895, 1221811, 122…	2640	1739	8067	1.11228	0.177312	0.00925112	0.257725
GOTERM_MF_ALL	GO:0043167~ion binding	635	6.86486	0.000180091	1207146, 1227404, 1224035, 1207041, 1226173, 1221504, 1216308, 1218764, 1208825, 1220843, 1227543, 1214502, 1216506, 1208176, 1207956, 1212382, 1220649, 1213925, 1213258, 1226036, 1221706, 1221116, 1205592, 1213115, 1221119, 1211822, 1218494, 1218492, 1221803, 1211150, 1226939, 1212278, 1207056, 1205449, 1207547, 1211248, 1224955, 1225992, 1206014, 1221719, 1211832, 1215137, 1219895, 1221811, 122…	2640	1746	8067	1.11132	0.198132	0.00998666	0.291524
GOTERM_MF_ALL	GO:0016887~ATPase activity	83	0.897297	0.000299309	1219988, 1222782, 1224035, 1221504, 1207598, 1213739, 1216068, 1205243, 1205088, 1227446, 1219837, 1212382, 1212309, 1221450, 1216752, 1213316, 1209015, 1209820, 1215832, 1210889, 1214746, 1214850, 1210357, 1211736, 1226976, 1224102, 1217591, 1227364, 1207406, 1212736, 1221406, 1226838, 1224454, 1215489, 1223958, 1210588, 1216762, 1227657, 1220299, 1210879, 1217768, 1220779, 1218997, 1222987, 122…	2640	182	8067	1.39353	0.307196	0.0158302	0.484072
GOTERM_MF_ALL	GO:0046872~metal ion binding	622	6.72432	0.000302597	1207146, 1227404, 1224035, 1207041, 1226173, 1221504, 1216308, 1218764, 1208825, 1220843, 1227543, 1214502, 1216506, 1208176, 1207956, 1212382, 1220649, 1213925, 1213258, 1226036, 1221706, 1221116, 1205592, 1213115, 1221119, 1211822, 1218494, 1218492, 1221803, 1211150, 1226939, 1212278, 1207056, 1205449, 1207547, 1211248, 1224955, 1225992, 1206014, 1221719, 1211832, 1215137, 1219895, 1221811, 122…	2640	1715	8067	1.10824	0.309984	0.0153411	0.489377
GOTERM_MF_ALL	GO:0005509~calcium ion binding	171	1.84865	0.000317239	1212119, 1218764, 1213629, 1220253, 1208577, 1227011, 1213520, 1216155, 1217393, 1216506, 1207956, 1220649, 1225035, 1207253, 1211552, 1213925, 1223425, 1222541, 1221116, 1213115, 1205822, 1226556, 1218492, 1221896, 1205118, 1208507, 1226939, 1212064, 1222732, 1209243, 1216764, 1215825, 1206586, 1208379, 1211832, 1212069, 1224250, 1212877, 1217692, 1221811, 1215248, 1227254, 1213133, 1226821, 120…	2640	419	8067	1.24707	0.322264	0.0154395	0.513
GOTERM_MF_ALL	GO:0005216~ion channel activity	95	1.02703	0.000338599	1215429, 1210947, 1227058, 1214997, 1218450, 1217544, 1226173, 1208249, 1220848, 1211318, 1205690, 1206780, 1213520, 1218458, 1214407, 1226884, 1208175, 1220096, 1220451, 1206121, 1223425, 1220785, 1213316, 1205145, 1211656, 1225463, 1213115, 1224619, 1209385, 1216923, 1222732, 1221021, 1211879, 1218468, 1206159, 1220321, 1226080, 1224765, 1218899, 1221066, 1205110, 1208640, 1205946, 1227207, 121…	2640	214	8067	1.35649	0.339787	0.0158421	0.547451
GOTERM_MF_ALL	GO:0003779~actin binding	52	0.562162	0.000371756	1220198, 1219128, 1220054, 1211418, 1211316, 1206128, 1215625, 1223883, 1212017, 1213115, 1212940, 1216492, 1221896, 1213442, 1210315, 1218131, 1227361, 1207407, 1211281, 1208604, 1206771, 1224310, 1214305, 1205157, 1227463, 1213070, 1227254, 1227257, 1221958, 1227295, 1206180, 1206740, 1220936, 1211533, 1207573, 1226861, 1218676, 1212260, 1212264, 1227490, 1211070, 1215516, 1215415, 1205171, 122…	2640	104	8067	1.52784	0.366096	0.0167419	0.600909
GOTERM_MF_ALL	GO:0022838~substrate specific channel activity	95	1.02703	0.000411482	1215429, 1210947, 1227058, 1214997, 1218450, 1217544, 1226173, 1208249, 1220848, 1211318, 1205690, 1206780, 1213520, 1218458, 1214407, 1226884, 1208175, 1220096, 1220451, 1206121, 1223425, 1220785, 1213316, 1205145, 1211656, 1225463, 1213115, 1224619, 1209385, 1216923, 1222732, 1221021, 1211879, 1218468, 1206159, 1220321, 1226080, 1224765, 1218899, 1221066, 1205110, 1208640, 1205946, 1227207, 121…	2640	215	8067	1.35018	0.396241	0.0178593	0.66492
GOTERM_MF_ALL	GO:0005262~calcium channel activity	22	0.237838	0.000465836	1227207, 1218450, 1209385, 1211855, 1227027, 1208249, 1222732, 1221021, 1211879, 1213520, 1206159, 1213856, 1210102, 1225764, 1220451, 1223425, 1220785, 1222414, 1218899, 1214690, 1220002, 1221828	2640	34	8067	1.97721	0.43518	0.0195055	0.752442
GOTERM_MF_ALL	GO:0022803~passive transmembrane transporter activity	95	1.02703	0.000498292	1215429, 1210947, 1227058, 1214997, 1218450, 1217544, 1226173, 1208249, 1220848, 1211318, 1205690, 1206780, 1213520, 1218458, 1214407, 1226884, 1208175, 1220096, 1220451, 1206121, 1223425, 1220785, 1213316, 1205145, 1211656, 1225463, 1213115, 1224619, 1209385, 1216923, 1222732, 1221021, 1211879, 1218468, 1206159, 1220321, 1226080, 1224765, 1218899, 1221066, 1205110, 1208640, 1205946, 1227207, 121…	2640	216	8067	1.34393	0.457224	0.0201626	0.804668
GOTERM_MF_ALL	GO:0015267~channel activity	95	1.02703	0.000498292	1215429, 1210947, 1227058, 1214997, 1218450, 1217544, 1226173, 1208249, 1220848, 1211318, 1205690, 1206780, 1213520, 1218458, 1214407, 1226884, 1208175, 1220096, 1220451, 1206121, 1223425, 1220785, 1213316, 1205145, 1211656, 1225463, 1213115, 1224619, 1209385, 1216923, 1222732, 1221021, 1211879, 1218468, 1206159, 1220321, 1226080, 1224765, 1218899, 1221066, 1205110, 1208640, 1205946, 1227207, 121…	2640	216	8067	1.34393	0.457224	0.0201626	0.804668
GOTERM_MF_ALL	GO:0003824~catalytic activity	1046	11.3081	0.000534463	1226848, 1225595, 1227404, 1224035, 1213255, 1221504, 1206959, 1213251, 1219743, 1211829, 1213258, 1225053, 1205592, 1221119, 1218490, 1211150, 1220830, 1222192, 1205190, 1212278, 1224044, 1208958, 1225580, 1215384, 1227690, 1226838, 1206296, 1225049, 1225046, 1225045, 1214779, 1206014, 1211836, 1224851, 1205587, 1208189, 1224857, 1225588, 1221053, 1224057, 1226825, 1206932, 1205167, 1225963, 121…	2640	2988	8067	1.06969	0.48078	0.0209209	0.862842
GOTERM_MF_ALL	GO:0019899~enzyme binding	49	0.52973	0.000754134	1225265, 1225466, 1205694, 1213290, 1221503, 1226171, 1216440, 1217589, 1214502, 1206766, 1209820, 1205829, 1225099, 1214850, 1225423, 1216119, 1205190, 1220520, 1205017, 1208958, 1227364, 1208470, 1225942, 1205157, 1227463, 1220634, 1209767, 1217240, 1225371, 1223687, 1208262, 1221125, 1219818, 1213234, 1211533, 1205604, 1218676, 1220349, 1221420, 1205039, 1226583, 1206795, 1212187, 1207067, 122…	2640	99	8067	1.51241	0.603436	0.02849	1.21545
GOTERM_MF_ALL	GO:0008092~cytoskeletal protein binding	73	0.789189	0.00088094	1220198, 1225369, 1219128, 1220054, 1211418, 1207146, 1211316, 1226171, 1206128, 1215625, 1223883, 1217193, 1212017, 1213115, 1212940, 1216492, 1224106, 1213442, 1221896, 1210315, 1219427, 1218131, 1207803, 1227361, 1211281, 1207407, 1208604, 1206771, 1224454, 1224310, 1214305, 1205157, 1227463, 1225438, 1213070, 1213776, 1227254, 1206642, 1221958, 1227257, 1208082, 1227295, 1206180, 1216137, 120…	2640	161	8067	1.3855	0.660577	0.0322124	1.41846
GOTERM_MF_ALL	GO:0016773~phosphotransferase activity, alcohol group as acceptor	175	1.89189	0.0010148	1226848, 1220356, 1206622, 1227404, 1209309, 1208062, 1209254, 1208403, 1212195, 1220256, 1221585, 1210576, 1222547, 1224462, 1227019, 1222069, 1213258, 1220808, 1219886, 1211656, 1222444, 1217936, 1224755, 1224262, 1222447, 1215244, 1212066, 1208958, 1225781, 1225045, 1209044, 1227185, 1206113, 1226765, 1223629, 1223816, 1207346, 1205831, 1224857, 1225189, 1213444, 1215608, 1206642, 1226825, 122…	2640	439	8067	1.2181	0.711996	0.0359491	1.63234
GOTERM_MF_ALL	GO:0004114~3',5'-cyclic-nucleotide phosphodiesterase activity	13	0.140541	0.00154181	1214700, 1218592, 1217483, 1211778, 1224189, 1213290, 1220546, 1211588, 1216136, 1220525, 1206690, 1213411, 1206909	2640	17	8067	2.3367	0.849188	0.0526145	2.47016
GOTERM_MF_ALL	GO:0005089~Rho guanyl-nucleotide exchange factor activity	24	0.259459	0.00166644	1216993, 1211133, 1226272, 1209281, 1224403, 1224023, 1209544, 1223234, 1222111, 1208577, 1226403, 1225661, 1223097, 1214080, 1215464, 1218041, 1218305, 1215744, 1212385, 1217907, 1221235, 1217790, 1226982, 1221367	2640	41	8067	1.78869	0.870589	0.055216	2.6673
GOTERM_MF_ALL	GO:0005083~small GTPase regulator activity	54	0.583784	0.00179849	1216993, 1225265, 1226272, 1223234, 1208577, 1213668, 1218935, 1208011, 1215464, 1217733, 1218041, 1212385, 1207295, 1226982, 1218494, 1215244, 1209281, 1222111, 1209142, 1209972, 1225475, 1211691, 1217790, 1211133, 1224403, 1208081, 1209516, 1226438, 1219217, 1223097, 1222563, 1214080, 1222349, 1221235, 1221367, 1221420, 1205039, 1209897, 1221778, 1224023, 1226583, 1220209, 1209544, 1226403, 120…	2640	115	8067	1.43484	0.889963	0.0579029	2.87578
GOTERM_MF_ALL	GO:0016788~hydrolase activity, acting on ester bonds	142	1.53514	0.00183943	1212191, 1217489, 1217483, 1225706, 1225513, 1207952, 1212609, 1220808, 1206767, 1225053, 1217095, 1217632, 1227195, 1207252, 1207449, 1214700, 1220976, 1215969, 1211778, 1224189, 1217524, 1227690, 1214967, 1216768, 1220822, 1223228, 1225046, 1208378, 1209044, 1205636, 1206820, 1207641, 1212790, 1209371, 1222284, 1223190, 1214835, 1222008, 1213025, 1222691, 1220230, 1216136, 1219219, 1226960, 120…	2640	352	8067	1.23269	0.895359	0.0576708	2.94033
GOTERM_MF_ALL	GO:0035091~phosphoinositide binding	26	0.281081	0.00194248	1226517, 1219889, 1211235, 1210139, 1211924, 1227640, 1206672, 1216020, 1209960, 1223328, 1217663, 1224755, 1210667, 1218295, 1216947, 1212187, 1214889, 1206731, 1217181, 1209977, 1214245, 1224372, 1227488, 1207346, 1212873, 1211061	2640	46	8067	1.72712	0.9078	0.0592924	3.10263
GOTERM_MF_ALL	GO:0005085~guanyl-nucleotide exchange factor activity	37	0.4	0.00228451	1216993, 1211133, 1226272, 1223687, 1224403, 1223234, 1208577, 1218935, 1221125, 1223097, 1226794, 1215464, 1214080, 1218041, 1212385, 1205829, 1223429, 1226536, 1221235, 1221367, 1226982, 1209281, 1205017, 1224023, 1222111, 1209544, 1226403, 1225661, 1226780, 1218305, 1215744, 1216015, 1217907, 1217670, 1225371, 1227311, 1217790	2640	73	8067	1.54877	0.939434	0.0676999	3.63951
GOTERM_MF_ALL	GO:0005088~Ras guanyl-nucleotide exchange factor activity	24	0.259459	0.00255545	1216993, 1211133, 1226272, 1209281, 1224403, 1224023, 1209544, 1223234, 1222111, 1208577, 1226403, 1225661, 1223097, 1214080, 1215464, 1218041, 1218305, 1215744, 1212385, 1217907, 1221235, 1217790, 1226982, 1221367	2640	42	8067	1.7461	0.956587	0.0736581	4.06279
GOTERM_MF_ALL	GO:0008081~phosphoric diester hydrolase activity	24	0.259459	0.00255545	1214700, 1218592, 1215153, 1217483, 1223190, 1211778, 1221934, 1213025, 1224189, 1213290, 1220546, 1213037, 1211588, 1219117, 1207952, 1216136, 1220525, 1206690, 1220808, 1213411, 1210624, 1221753, 1206909, 1224148	2640	42	8067	1.7461	0.956587	0.0736581	4.06279
GOTERM_MF_ALL	GO:0051020~GTPase binding	16	0.172973	0.00258867	1221420, 1225265, 1205039, 1205017, 1223687, 1226583, 1221125, 1206795, 1222232, 1205157, 1205829, 1218676, 1217240, 1225371, 1214850, 1227536	2640	24	8067	2.03712	0.958324	0.0728708	4.11457
GOTERM_MF_ALL	GO:0008134~transcription factor binding	44	0.475676	0.00261142	1221053, 1225241, 1207041, 1225323, 1226093, 1225963, 1212364, 1217589, 1214808, 1224949, 1220121, 1219863, 1213353, 1206766, 1224963, 1206243, 1225177, 1225387, 1227193, 1225423, 1206974, 1221725, 1213702, 1220349, 1220520, 1212089, 1215550, 1212278, 1226263, 1205402, 1205405, 1212631, 1227550, 1211933, 1227630, 1207172, 1212002, 1225942, 1219241, 1218382, 1224836, 1219735, 1225722, 1205659	2640	91	8067	1.47747	0.959473	0.0718419	4.15002
GOTERM_MF_ALL	GO:0005543~phospholipid binding	31	0.335135	0.00286432	1226517, 1205365, 1219889, 1205660, 1211235, 1210139, 1213331, 1211924, 1227640, 1222225, 1206672, 1216020, 1209960, 1223328, 1217663, 1224755, 1210667, 1218295, 1216947, 1219674, 1206731, 1214889, 1212187, 1217181, 1209977, 1224372, 1214245, 1227488, 1207346, 1212873, 1211061	2640	59	8067	1.60553	0.970303	0.0768144	4.54323
GOTERM_MF_ALL	GO:0004672~protein kinase activity	145	1.56757	0.0029179	1226848, 1220356, 1227404, 1209309, 1208062, 1209254, 1212195, 1220256, 1210576, 1224462, 1222547, 1213258, 1222069, 1220808, 1219886, 1211656, 1222444, 1217936, 1224755, 1222447, 1215244, 1212066, 1208958, 1225781, 1209044, 1227185, 1206113, 1226765, 1223629, 1223816, 1224857, 1225189, 1213444, 1206642, 1215608, 1225772, 1210753, 1224981, 1222627, 1211272, 1223253, 1214045, 1213234, 1218725, 122…	2640	364	8067	1.21724	0.972196	0.0765262	4.62634
GOTERM_MF_ALL	GO:0003887~DNA-directed DNA polymerase activity	12	0.12973	0.00339071	1226974, 1223586, 1205201, 1226484, 1217711, 1225562, 1216337, 1210391, 1210558, 1222987, 1227543, 1210386	2640	16	8067	2.29176	0.984456	0.086547	5.3568
GOTERM_MF_ALL	GO:0005003~ephrin receptor activity	11	0.118919	0.00343019	1226024, 1205075, 1209309, 1219734, 1208062, 1208268, 1224302, 1208414, 1225189, 1211062, 1210805	2640	14	8067	2.40089	0.985193	0.0857312	5.41756
GOTERM_MF_ALL	GO:0005244~voltage-gated ion channel activity	45	0.486486	0.00377124	1212320, 1227058, 1218450, 1217544, 1221765, 1215309, 1213520, 1218458, 1214407, 1213856, 1226884, 1211700, 1206390, 1215300, 1223425, 1205476, 1216334, 1213115, 1225463, 1211656, 1206830, 1217755, 1224117, 1206843, 1227027, 1211855, 1222309, 1216923, 1206320, 1221021, 1211879, 1206159, 1218468, 1222516, 1226080, 1218899, 1213651, 1221066, 1221839, 1214690, 1208640, 1220447, 1205946, 1227481, 120…	2640	95	8067	1.44743	0.990268	0.0919955	5.94088
GOTERM_MF_ALL	GO:0022832~voltage-gated channel activity	45	0.486486	0.00377124	1212320, 1227058, 1218450, 1217544, 1221765, 1215309, 1213520, 1218458, 1214407, 1213856, 1226884, 1211700, 1206390, 1215300, 1223425, 1205476, 1216334, 1213115, 1225463, 1211656, 1206830, 1217755, 1224117, 1206843, 1227027, 1211855, 1222309, 1216923, 1206320, 1221021, 1211879, 1206159, 1218468, 1222516, 1226080, 1218899, 1213651, 1221066, 1221839, 1214690, 1208640, 1220447, 1205946, 1227481, 120…	2640	95	8067	1.44743	0.990268	0.0919955	5.94088
GOTERM_MF_ALL	GO:0000287~magnesium ion binding	51	0.551351	0.00425215	1226518, 1219988, 1212152, 1227404, 1224035, 1224691, 1221504, 1215166, 1227543, 1212382, 1216752, 1209914, 1209015, 1213115, 1227470, 1212247, 1207487, 1214572, 1211696, 1220390, 1207406, 1214967, 1223228, 1226729, 1225901, 1211604, 1221954, 1226302, 1216835, 1222595, 1220230, 1215440, 1225483, 1219955, 1221561, 1206601, 1224440, 1210558, 1210416, 1219445, 1220991, 1207691, 1216102, 1227346, 121…	2640	111	8067	1.40396	0.994616	0.10113	6.67419
GOTERM_MF_ALL	GO:0030234~enzyme regulator activity	127	1.37297	0.00429103	1207147, 1223234, 1221787, 1208577, 1218935, 1220985, 1217733, 1226031, 1224960, 1212385, 1209538, 1205829, 1223429, 1209195, 1216451, 1220459, 1214850, 1218494, 1215244, 1211779, 1222111, 1221899, 1214305, 1210585, 1216360, 1225371, 1213383, 1221399, 1217790, 1207638, 1223115, 1211133, 1211907, 1227133, 1214461, 1210753, 1216832, 1226438, 1219217, 1222563, 1225305, 1205604, 1226536, 1221235, 120…	2640	317	8067	1.2242	0.994867	0.100074	6.73324
GOTERM_MF_ALL	GO:0046873~metal ion transmembrane transporter activity	71	0.767568	0.00525372	1221412, 1227058, 1218450, 1217544, 1226173, 1218742, 1208249, 1220848, 1213520, 1218458, 1214407, 1226884, 1208175, 1225852, 1220096, 1220451, 1220785, 1209015, 1223425, 1213115, 1225463, 1211656, 1209385, 1222732, 1221021, 1211879, 1206159, 1218468, 1222841, 1220299, 1224765, 1218899, 1208640, 1211604, 1227207, 1221954, 1212320, 1216633, 1221765, 1212622, 1215309, 1211362, 1219818, 1213856, 121…	2640	165	8067	1.31487	0.998432	0.118939	8.18425
GOTERM_MF_ALL	GO:0004713~protein tyrosine kinase activity	49	0.52973	0.00553864	1222475, 1209309, 1208062, 1218451, 1216440, 1212195, 1210805, 1225957, 1219886, 1222472, 1224755, 1225642, 1225781, 1209087, 1207112, 1218138, 1226765, 1218900, 1220737, 1214479, 1224857, 1225189, 1210929, 1206642, 1215608, 1210796, 1205748, 1208268, 1214428, 1222595, 1225772, 1211272, 1215440, 1219413, 1213587, 1224302, 1227524, 1208074, 1205075, 1210950, 1211165, 1219734, 1208414, 1209816, 122…	2640	107	8067	1.39933	0.998896	0.122736	8.60961
GOTERM_MF_ALL	GO:0008047~enzyme activator activity	45	0.486486	0.00604486	1223115, 1225446, 1207147, 1208081, 1209516, 1225146, 1214461, 1213668, 1220985, 1216444, 1226438, 1219217, 1208011, 1222563, 1217733, 1205604, 1209195, 1214850, 1222349, 1214015, 1218494, 1208655, 1205039, 1215244, 1209897, 1221778, 1220049, 1220209, 1211779, 1213167, 1214305, 1211813, 1214980, 1217418, 1209142, 1210585, 1210248, 1217907, 1209972, 1216360, 1207268, 1210469, 1221399, 1211691, 120…	2640	97	8067	1.41758	0.999409	0.130863	9.36079
GOTERM_MF_ALL	GO:0005516~calmodulin binding	17	0.183784	0.00657921	1227254, 1221954, 1210315, 1217956, 1218131, 1212578, 1205735, 1227346, 1222732, 1215625, 1206180, 1225764, 1205701, 1214909, 1212260, 1212940, 1227490	2640	28	8067	1.85524	0.999694	0.139177	10.1474
GOTERM_MF_ALL	GO:0008066~glutamate receptor activity	12	0.12973	0.00678036	1214997, 1223213, 1211572, 1222732, 1215698, 1211318, 1222072, 1220321, 1213196, 1205011, 1215953, 1218214	2640	17	8067	2.15695	0.999761	0.140715	10.4419
GOTERM_MF_ALL	GO:0005096~GTPase activator activity	37	0.4	0.00692532	1223115, 1225446, 1207147, 1208081, 1209516, 1225146, 1214461, 1213668, 1220985, 1216444, 1226438, 1219217, 1208011, 1217733, 1222563, 1209195, 1222349, 1214850, 1218494, 1205039, 1215244, 1209897, 1220049, 1221778, 1211779, 1220209, 1211813, 1214980, 1209142, 1217418, 1210248, 1217907, 1209972, 1216360, 1207268, 1210469, 1211691	2640	77	8067	1.46831	0.999801	0.141134	10.6535
GOTERM_MF_ALL	GO:0005234~extracellular-glutamate-gated ion channel activity	11	0.118919	0.00728336	1214997, 1223213, 1211572, 1222732, 1215698, 1211318, 1222072, 1220321, 1213196, 1215953, 1218214	2640	15	8067	2.24083	0.999872	0.145492	11.1743
GOTERM_MF_ALL	GO:0005245~voltage-gated calcium channel activity	11	0.118919	0.00728336	1223425, 1218450, 1211855, 1227027, 1218899, 1221021, 1214690, 1206159, 1213520, 1211879, 1213856	2640	15	8067	2.24083	0.999872	0.145492	11.1743
GOTERM_MF_ALL	GO:0004970~ionotropic glutamate receptor activity	11	0.118919	0.00728336	1214997, 1223213, 1211572, 1222732, 1215698, 1211318, 1222072, 1220321, 1213196, 1215953, 1218214	2640	15	8067	2.24083	0.999872	0.145492	11.1743
GOTERM_MF_ALL	GO:0022836~gated channel activity	71	0.767568	0.00736453	1227058, 1214997, 1218450, 1217544, 1226173, 1208249, 1211318, 1213520, 1206780, 1218458, 1214407, 1226884, 1223425, 1220785, 1211656, 1225463, 1213115, 1209385, 1216923, 1222732, 1221021, 1211879, 1206159, 1218468, 1220321, 1226080, 1224765, 1218899, 1221066, 1205110, 1208640, 1205946, 1212320, 1223213, 1221765, 1215309, 1213856, 1215953, 1215300, 1211700, 1206390, 1205476, 1216334, 1206830, 121…	2640	167	8067	1.29912	0.999884	0.144652	11.2919
GOTERM_MF_ALL	GO:0016301~kinase activity	183	1.97838	0.00824423	1226848, 1220356, 1206622, 1227404, 1209309, 1208062, 1209254, 1208403, 1212195, 1220256, 1221585, 1210576, 1222547, 1224462, 1227019, 1222069, 1213258, 1220808, 1219886, 1211656, 1222444, 1217936, 1224755, 1224262, 1222447, 1215244, 1212066, 1208958, 1225781, 1225045, 1209044, 1227185, 1206113, 1226765, 1223629, 1223816, 1207346, 1205831, 1224857, 1225189, 1213444, 1220373, 1215608, 1206642, 122…	2640	481	8067	1.16256	0.999961	0.15804	12.5577
GOTERM_MF_ALL	GO:0016772~transferase activity, transferring phosphorus-containing groups	213	2.3027	0.00831246	1226848, 1220356, 1227404, 1210391, 1209254, 1208403, 1227543, 1220256, 1210576, 1224462, 1213258, 1222069, 1219886, 1211656, 1217198, 1215244, 1208958, 1223897, 1225045, 1209044, 1227185, 1205831, 1224857, 1225189, 1217462, 1223586, 1220373, 1215608, 1226825, 1210753, 1224981, 1211272, 1218725, 1213234, 1218726, 1222699, 1205701, 1224440, 1210558, 1223760, 1224302, 1205075, 1215887, 1210950, 122…	2640	567	8067	1.1479	0.999964	0.156808	12.6552
GOTERM_MF_ALL	GO:0015075~ion transmembrane transporter activity	154	1.66486	0.0095637	1221412, 1215429, 1221188, 1224035, 1226173, 1221504, 1218742, 1220848, 1213520, 1206780, 1212382, 1208175, 1220451, 1206121, 1216752, 1223425, 1220785, 1213316, 1211558, 1209820, 1218499, 1213115, 1211656, 1224560, 1213633, 1208912, 1207051, 1209385, 1222732, 1222841, 1216762, 1218899, 1224765, 1227108, 1205110, 1221066, 1205946, 1212320, 1224248, 1216633, 1221765, 1206183, 1215309, 1224151, 121…	2640	400	8067	1.17644	0.999992	0.175633	14.4245
GOTERM_MF_ALL	GO:0008237~metallopeptidase activity	48	0.518919	0.00960542	1212117, 1213133, 1216778, 1213112, 1225466, 1213624, 1222784, 1208945, 1222574, 1225793, 1207024, 1205743, 1209081, 1212823, 1215497, 1209055, 1218437, 1219415, 1223327, 1227593, 1227200, 1210972, 1217841, 1215550, 1208583, 1205210, 1210475, 1223400, 1215319, 1219190, 1206155, 1224162, 1223285, 1221298, 1221132, 1211578, 1226895, 1224166, 1212439, 1211898, 1225215, 1218778, 1221594, 1224313, 122…	2640	107	8067	1.37077	0.999993	0.17375	14.483
GOTERM_MF_ALL	GO:0022892~substrate-specific transporter activity	190	2.05405	0.00989067	1221412, 1215429, 1221188, 1224035, 1226173, 1221504, 1218742, 1220848, 1206780, 1222061, 1213520, 1212382, 1208175, 1212309, 1220451, 1225058, 1206121, 1216752, 1223425, 1220785, 1213316, 1211558, 1222541, 1218499, 1209820, 1205624, 1213115, 1211656, 1216897, 1221386, 1224560, 1213633, 1208912, 1207051, 1209385, 1225234, 1222732, 1222841, 1216762, 1218899, 1224765, 1225373, 1227108, 1205110, 122…	2640	503	8067	1.15423	0.999995	0.175876	14.8813
GOTERM_MF_ALL	GO:0004112~cyclic-nucleotide phosphodiesterase activity	13	0.140541	0.0109533	1214700, 1218592, 1217483, 1211778, 1224189, 1213290, 1220546, 1211588, 1216136, 1220525, 1206690, 1213411, 1206909	2640	20	8067	1.98619	0.999999	0.190211	16.3502
GOTERM_MF_ALL	GO:0016791~phosphatase activity	57	0.616216	0.0116832	1212191, 1214409, 1205084, 1217489, 1215166, 1212609, 1206767, 1227470, 1217095, 1225758, 1207252, 1212247, 1207487, 1207449, 1205214, 1206340, 1223912, 1227458, 1214967, 1220822, 1223228, 1208995, 1211504, 1225046, 1214815, 1206820, 1225085, 1207641, 1225539, 1214835, 1222008, 1212621, 1222691, 1220230, 1211633, 1221561, 1207649, 1224081, 1205502, 1224945, 1225442, 1223698, 1207461, 1214326, 122…	2640	132	8067	1.3195	0.999999	0.198812	17.3452
GOTERM_MF_ALL	GO:0005261~cation channel activity	60	0.648649	0.0136478	1227058, 1218450, 1217544, 1226173, 1208249, 1220848, 1213520, 1218458, 1214407, 1226884, 1208175, 1220451, 1220096, 1220785, 1223425, 1213115, 1225463, 1211656, 1209385, 1222732, 1221021, 1211879, 1206159, 1218468, 1218899, 1224765, 1208640, 1227207, 1212320, 1216633, 1221765, 1215309, 1219818, 1213856, 1210102, 1211700, 1215300, 1205476, 1216334, 1206830, 1217755, 1220002, 1221828, 1215400, 120…	2640	141	8067	1.30029	1	0.225289	19.9687
GOTERM_MF_ALL	GO:0003777~microtubule motor activity	20	0.216216	0.0142495	1214367, 1210280, 1226976, 1224200, 1217591, 1207200, 1220266, 1218134, 1220897, 1207223, 1210267, 1227421, 1208533, 1205800, 1210879, 1224851, 1227666, 1217663, 1225395, 1205102	2640	37	8067	1.65172	1	0.230966	20.7564
GOTERM_MF_ALL	GO:0003712~transcription cofactor activity	24	0.259459	0.0149631	1220349, 1213702, 1221053, 1220520, 1215550, 1212278, 1226263, 1225323, 1205402, 1227550, 1205405, 1225963, 1212364, 1207172, 1220121, 1218382, 1206766, 1224836, 1219735, 1225177, 1206243, 1225387, 1225722, 1205659	2640	47	8067	1.56035	1	0.238005	21.6812
GOTERM_MF_ALL	GO:0022857~transmembrane transporter activity	181	1.95676	0.0151032	1221412, 1215429, 1221188, 1224035, 1226173, 1221504, 1218742, 1220848, 1213739, 1213520, 1222061, 1206780, 1212382, 1208175, 1212309, 1220451, 1206121, 1216752, 1223425, 1220785, 1213316, 1211558, 1222541, 1218499, 1209820, 1213115, 1211656, 1221386, 1224560, 1221212, 1213633, 1208912, 1207051, 1209385, 1225234, 1222732, 1221406, 1209839, 1222841, 1210588, 1216762, 1218899, 1224765, 1220779, 122…	2640	482	8067	1.14747	1	0.236928	21.8615
GOTERM_MF_ALL	GO:0008757~S-adenosylmethionine-dependent methyltransferase activity	17	0.183784	0.0154365	1219011, 1222829, 1205830, 1211774, 1212278, 1218977, 1207041, 1209621, 1205405, 1217432, 1223280, 1214241, 1206014, 1222403, 1214004, 1222160, 1220196	2640	30	8067	1.73155	1	0.238502	22.2891
GOTERM_MF_ALL	GO:0004012~phospholipid-translocating ATPase activity	8	0.0864865	0.017573	1212382, 1219988, 1225483, 1216752, 1220991, 1227657, 1224035, 1221504	2640	10	8067	2.44455	1	0.263718	24.978
GOTERM_MF_ALL	GO:0015247~aminophospholipid transporter activity	8	0.0864865	0.017573	1212382, 1219988, 1225483, 1216752, 1220991, 1227657, 1224035, 1221504	2640	10	8067	2.44455	1	0.263718	24.978
GOTERM_MF_ALL	GO:0043492~ATPase activity, coupled to movement of substances	32	0.345946	0.0177739	1221954, 1219988, 1222782, 1224035, 1221504, 1207598, 1213739, 1224151, 1224906, 1205088, 1212382, 1212309, 1216752, 1225483, 1209015, 1213316, 1209820, 1214850, 1215547, 1220991, 1214514, 1221406, 1208523, 1210588, 1212098, 1216762, 1227657, 1220299, 1207758, 1220779, 1211604, 1219616	2640	68	8067	1.43797	1	0.263151	25.2262
GOTERM_MF_ALL	GO:0016563~transcription activator activity	40	0.432432	0.0180407	1224770, 1221053, 1208082, 1225963, 1212364, 1210091, 1217589, 1218092, 1213339, 1220121, 1209961, 1206766, 1209863, 1225177, 1225387, 1218417, 1219609, 1225423, 1226614, 1220349, 1227314, 1220520, 1216946, 1215550, 1226263, 1212631, 1227630, 1214816, 1205711, 1218382, 1227463, 1224836, 1219735, 1207926, 1219975, 1215982, 1225722, 1206564, 1205659, 1223020	2640	89	8067	1.37334	1	0.26343	25.5547
GOTERM_MF_ALL	GO:0016874~ligase activity	67	0.724324	0.0184074	1227232, 1208776, 1213255, 1210672, 1226882, 1221740, 1207109, 1224824, 1221213, 1218392, 1214741, 1227301, 1214928, 1221803, 1205212, 1205190, 1210217, 1206347, 1205093, 1224559, 1217456, 1216720, 1211938, 1207480, 1209665, 1213304, 1219895, 1225435, 1216933, 1211438, 1209414, 1226203, 1222105, 1218720, 1208900, 1213857, 1209510, 1218195, 1213680, 1206930, 1222909, 1216974, 1220664, 1219055, 122…	2640	162	8067	1.26377	1	0.264944	26.0042
GOTERM_MF_ALL	GO:0003774~motor activity	41	0.443243	0.019358	1224200, 1227295, 1213527, 1220538, 1215625, 1220177, 1206180, 1223253, 1213788, 1227421, 1208533, 1222569, 1205800, 1227666, 1217663, 1205102, 1227490, 1223331, 1210315, 1214367, 1210280, 1226976, 1217591, 1217495, 1218131, 1207200, 1222750, 1220266, 1218134, 1220897, 1222650, 1224472, 1214345, 1207223, 1210267, 1207220, 1210879, 1219307, 1224851, 1225395, 1210524	2640	92	8067	1.36177	1	0.273518	27.1571
GOTERM_MF_ALL	GO:0022843~voltage-gated cation channel activity	36	0.389189	0.0201783	1212320, 1227058, 1218450, 1217544, 1221765, 1215309, 1213520, 1218458, 1214407, 1213856, 1226884, 1215300, 1211700, 1223425, 1205476, 1216334, 1211656, 1225463, 1213115, 1206830, 1217755, 1206843, 1227027, 1211855, 1222309, 1206320, 1221021, 1211879, 1206159, 1218468, 1222516, 1218899, 1213651, 1214690, 1208640, 1227481	2640	79	8067	1.39246	1	0.280239	28.1386
GOTERM_MF_ALL	GO:0042623~ATPase activity, coupled	62	0.67027	0.020427	1219988, 1222782, 1224035, 1221504, 1207598, 1213739, 1216068, 1205243, 1205088, 1227446, 1212382, 1212309, 1221450, 1216752, 1213316, 1209015, 1209820, 1215832, 1214746, 1214850, 1210357, 1224102, 1227364, 1212736, 1226838, 1224454, 1221406, 1215489, 1223958, 1210588, 1216762, 1227657, 1220299, 1217768, 1220779, 1222987, 1205587, 1211604, 1219616, 1221954, 1218818, 1210207, 1227295, 1224151, 122…	2640	149	8067	1.27149	1	0.280075	28.4337
GOTERM_MF_ALL	GO:0003713~transcription coactivator activity	15	0.162162	0.0207879	1220349, 1221053, 1220520, 1215550, 1226263, 1225963, 1212364, 1220121, 1218382, 1206766, 1224836, 1225177, 1225387, 1225722, 1205659	2640	26	8067	1.76289	1	0.28121	28.8599
GOTERM_MF_ALL	GO:0008270~zinc ion binding	342	3.6973	0.0213974	1212117, 1207146, 1213624, 1220354, 1209925, 1207041, 1209436, 1213525, 1223748, 1216759, 1216308, 1208825, 1220843, 1220256, 1214502, 1208176, 1224464, 1215620, 1209055, 1218101, 1211551, 1213258, 1221706, 1218202, 1206438, 1221119, 1211822, 1223327, 1217091, 1218494, 1227195, 1211150, 1221803, 1210972, 1205830, 1208583, 1212278, 1216626, 1213635, 1207056, 1205429, 1205428, 1217490, 1205449, 122…	2640	956	8067	1.09314	1	0.285141	29.5743
GOTERM_MF_ALL	GO:0022891~substrate-specific transmembrane transporter activity	167	1.80541	0.0256407	1221412, 1215429, 1221188, 1224035, 1226173, 1221504, 1218742, 1220848, 1213520, 1222061, 1206780, 1212382, 1208175, 1220451, 1206121, 1216752, 1223425, 1220785, 1213316, 1211558, 1222541, 1218499, 1209820, 1213115, 1211656, 1221386, 1224560, 1213633, 1208912, 1207051, 1209385, 1222732, 1222841, 1216762, 1218899, 1224765, 1227108, 1205110, 1221066, 1205946, 1212320, 1224248, 1216633, 1221765, 120…	2640	448	8067	1.13906	1	0.328385	34.3645
GOTERM_MF_ALL	GO:0004386~helicase activity	40	0.432432	0.0266415	1210207, 1205243, 1216068, 1215933, 1218785, 1227446, 1221450, 1215832, 1227119, 1214746, 1224265, 1207605, 1219769, 1224758, 1208460, 1210357, 1219445, 1207581, 1207703, 1212089, 1224102, 1216645, 1220293, 1207964, 1212736, 1226838, 1224473, 1222394, 1209070, 1223958, 1225924, 1219260, 1217768, 1219975, 1222987, 1213485, 1205587, 1220653, 1225588, 1214713	2640	91	8067	1.34316	1	0.335493	35.4487
GOTERM_MF_ALL	GO:0001948~glycoprotein binding	9	0.0972973	0.0308619	1225697, 1209608, 1224990, 1216671, 1220634, 1219598, 1209854, 1216489, 1218379	2640	13	8067	2.11547	1	0.37418	39.8391
GOTERM_MF_ALL	GO:0005548~phospholipid transporter activity	8	0.0864865	0.0347935	1212382, 1219988, 1225483, 1216752, 1220991, 1227657, 1224035, 1221504	2640	11	8067	2.22231	1	0.407315	43.6756
GOTERM_MF_ALL	GO:0042626~ATPase activity, coupled to transmembrane movement of substances	30	0.324324	0.0365055	1219988, 1221954, 1222782, 1224035, 1221504, 1207598, 1213739, 1224151, 1224906, 1205088, 1212382, 1212309, 1225483, 1216752, 1209015, 1213316, 1209820, 1215547, 1220991, 1214514, 1221406, 1208523, 1210588, 1212098, 1216762, 1220299, 1207758, 1220779, 1211604, 1219616	2640	66	8067	1.38895	1	0.418866	45.2733
GOTERM_MF_ALL	GO:0031267~small GTPase binding	11	0.118919	0.038049	1205039, 1225265, 1221420, 1222232, 1205157, 1218676, 1226583, 1217240, 1214850, 1227536, 1206795	2640	18	8067	1.86736	1	0.428514	46.6773
GOTERM_MF_ALL	GO:0004402~histone acetyltransferase activity	7	0.0756757	0.038651	1221053, 1220520, 1206766, 1225963, 1212364, 1214638, 1207604	2640	9	8067	2.37664	1	0.429893	47.2156
GOTERM_MF_ALL	GO:0004468~lysine N-acetyltransferase activity	7	0.0756757	0.038651	1221053, 1220520, 1206766, 1225963, 1212364, 1214638, 1207604	2640	9	8067	2.37664	1	0.429893	47.2156
GOTERM_MF_ALL	GO:0004003~ATP-dependent DNA helicase activity	7	0.0756757	0.038651	1212089, 1216645, 1217768, 1205587, 1219769, 1218785, 1210357	2640	9	8067	2.37664	1	0.429893	47.2156
GOTERM_MF_ALL	GO:0016879~ligase activity, forming carbon-nitrogen bonds	45	0.486486	0.0407574	1216933, 1211438, 1227232, 1226203, 1213255, 1210672, 1218720, 1209510, 1226882, 1221740, 1218195, 1213680, 1206930, 1216974, 1221213, 1222909, 1227301, 1219055, 1221803, 1205212, 1220349, 1205190, 1210217, 1206347, 1205093, 1224559, 1216284, 1225006, 1210669, 1222653, 1214039, 1212459, 1211938, 1216075, 1214127, 1216840, 1211260, 1213304, 1226492, 1214558, 1219903, 1219895, 1213461, 1205562, 122…	2640	107	8067	1.2851	1	0.443664	49.0594
GOTERM_MF_ALL	GO:0008276~protein methyltransferase activity	10	0.108108	0.0443428	1214241, 1222829, 1205830, 1211774, 1209621, 1222160, 1214004, 1217432, 1223280, 1220196	2640	16	8067	1.9098	1	0.468415	52.0596
GOTERM_MF_ALL	GO:0003682~chromatin binding	26	0.281081	0.0509146	1211212, 1209925, 1208082, 1210391, 1214782, 1212364, 1219831, 1214045, 1206023, 1205822, 1209698, 1208460, 1224758, 1216119, 1226614, 1215554, 1207703, 1227550, 1227630, 1216414, 1226446, 1216887, 1219975, 1214004, 1213485, 1218404	2640	57	8067	1.39382	1	0.513174	57.133
GOTERM_MF_ALL	GO:0003678~DNA helicase activity	9	0.0972973	0.0517064	1212089, 1219260, 1216645, 1217768, 1224265, 1205587, 1219769, 1218785, 1210357	2640	14	8067	1.96437	1	0.514812	57.709
GOTERM_MF_ALL	GO:0005215~transporter activity	225	2.43243	0.0561114	1221412, 1224035, 1226173, 1221504, 1218742, 1220848, 1220255, 1220844, 1213520, 1222061, 1212382, 1208175, 1220451, 1225058, 1216752, 1223425, 1220785, 1211558, 1218499, 1209820, 1213115, 1211656, 1216897, 1224560, 1221212, 1213633, 1208912, 1207051, 1209385, 1221406, 1209839, 1223434, 1210588, 1216762, 1218899, 1220779, 1221066, 1219616, 1205946, 1216633, 1206183, 1224151, 1211700, 1212657, 120…	2640	628	8067	1.09479	1	0.540676	60.7834
GOTERM_MF_ALL	GO:0015662~ATPase activity, coupled to transmembrane movement of ions, phosphorylative mechanism	17	0.183784	0.0571663	1221954, 1219988, 1220991, 1224035, 1214514, 1221504, 1224151, 1212382, 1208523, 1212098, 1216762, 1216752, 1225483, 1209015, 1209820, 1220299, 1211604	2640	34	8067	1.52784	1	0.543627	61.4879
GOTERM_MF_ALL	GO:0042054~histone methyltransferase activity	8	0.0864865	0.060301	1214241, 1222829, 1205830, 1209621, 1222160, 1214004, 1217432, 1220196	2640	12	8067	2.03712	1	0.55953	63.5118
GOTERM_MF_ALL	GO:0016820~hydrolase activity, acting on acid anhydrides, catalyzing transmembrane movement of substances	30	0.324324	0.0653097	1219988, 1221954, 1222782, 1224035, 1221504, 1207598, 1213739, 1224151, 1224906, 1205088, 1212382, 1212309, 1225483, 1216752, 1209015, 1213316, 1209820, 1215547, 1220991, 1214514, 1221406, 1208523, 1210588, 1212098, 1216762, 1220299, 1207758, 1220779, 1211604, 1219616	2640	69	8067	1.32856	1	0.585588	66.5397
GOTERM_MF_ALL	GO:0017016~Ras GTPase binding	10	0.108108	0.0675008	1205039, 1225265, 1221420, 1222232, 1205157, 1218676, 1226583, 1214850, 1227536, 1206795	2640	17	8067	1.79746	1	0.594206	67.7887
GOTERM_MF_ALL	GO:0008170~N-methyltransferase activity	9	0.0972973	0.0797752	1214241, 1222829, 1205830, 1209621, 1205405, 1222160, 1214004, 1217432, 1220196	2640	15	8067	1.83341	1	0.654144	74.0147
GOTERM_MF_ALL	GO:0022804~active transmembrane transporter activity	66	0.713514	0.080412	1219988, 1222782, 1221188, 1224035, 1221504, 1207598, 1213739, 1222061, 1205088, 1209967, 1212382, 1212309, 1227509, 1216752, 1213316, 1209015, 1222541, 1209820, 1213002, 1224560, 1221212, 1213633, 1215172, 1225234, 1212530, 1225646, 1209839, 1221406, 1210588, 1216762, 1220299, 1220779, 1227108, 1211604, 1219616, 1221954, 1224248, 1211841, 1206183, 1224151, 1224906, 1205746, 1225483, 1220760, 120…	2640	171	8067	1.17939	1	0.653383	74.3046
GOTERM_MF_ALL	GO:0003993~acid phosphatase activity	6	0.0648649	0.081639	1212191, 1207649, 1223912, 1215847, 1211750, 1225085	2640	8	8067	2.29176	1	0.65542	74.8548
GOTERM_MF_ALL	GO:0015631~tubulin binding	11	0.118919	0.0819186	1206642, 1213339, 1208082, 1215755, 1207803, 1205332, 1226171, 1216348, 1222718, 1224454, 1224310	2640	20	8067	1.68063	1	0.653002	74.9786
GOTERM_MF_ALL	GO:0004674~protein serine/threonine kinase activity	86	0.92973	0.0863391	1226848, 1226518, 1212152, 1226272, 1220356, 1227404, 1205009, 1217773, 1225323, 1209254, 1226591, 1220256, 1210576, 1209963, 1222547, 1224462, 1211093, 1222069, 1213258, 1220808, 1208343, 1222444, 1217936, 1227302, 1220425, 1211696, 1205018, 1225285, 1212066, 1208958, 1219567, 1215288, 1220295, 1227185, 1209044, 1206113, 1226729, 1223816, 1225475, 1213444, 1215180, 1217956, 1226302, 1211740, 121…	2640	229	8067	1.14755	1	0.669459	76.8616
GOTERM_MF_ALL	GO:0034061~DNA polymerase activity	16	0.172973	0.0864495	1226974, 1223586, 1205201, 1226484, 1225562, 1216337, 1214976, 1210391, 1220538, 1223897, 1227543, 1221655, 1217711, 1210558, 1222987, 1210386	2640	33	8067	1.48154	1	0.666307	76.9069
GOTERM_MF_ALL	GO:0004222~metalloendopeptidase activity	29	0.313514	0.0879321	1213133, 1212117, 1216778, 1225466, 1213624, 1213112, 1222784, 1225793, 1207024, 1212823, 1209055, 1223327, 1219415, 1227593, 1210972, 1217841, 1210475, 1219190, 1223400, 1224162, 1221132, 1211578, 1224166, 1225215, 1221594, 1224313, 1224978, 1220084, 1218212	2640	68	8067	1.30316	1	0.669218	77.507
GOTERM_MF_ALL	GO:0008509~anion transmembrane transporter activity	23	0.248649	0.0932954	1213633, 1224783, 1221188, 1216923, 1225646, 1227509, 1226080, 1206390, 1213316, 1218499, 1206739, 1220760, 1207060, 1205619, 1215916, 1221066, 1205110, 1226345, 1221839, 1205946, 1220447, 1224117, 1205512	2640	52	8067	1.35155	1	0.688312	79.5577
GOTERM_MF_ALL	GO:0003702~RNA polymerase II transcription factor activity	23	0.248649	0.0932954	1227137, 1213702, 1225819, 1207467, 1208124, 1211416, 1226263, 1208082, 1216645, 1212631, 1227550, 1211933, 1227630, 1214595, 1218475, 1205711, 1219735, 1223289, 1213304, 1216414, 1224963, 1209234, 1226614	2640	52	8067	1.35155	1	0.688312	79.5577
GOTERM_MF_ALL	GO:0005217~intracellular ligand-gated ion channel activity	5	0.0540541	0.0940488	1220785, 1209385, 1208249, 1224765, 1220002	2640	6	8067	2.5464	1	0.687873	79.8313
GOTERM_MF_ALL	GO:0016741~transferase activity, transferring one-carbon groups	35	0.378378	0.094256	1209375, 1214662, 1209925, 1214543, 1218977, 1207041, 1215161, 1224994, 1221457, 1205149, 1213928, 1222403, 1216005, 1222160, 1223324, 1210736, 1220196, 1219011, 1222829, 1218178, 1205830, 1211774, 1210383, 1212278, 1224559, 1219582, 1215384, 1209621, 1205405, 1217432, 1223280, 1214241, 1206014, 1214004, 1221044	2640	85	8067	1.25822	1	0.685234	79.906
GOTERM_MF_FAT	GO:0032559~adenyl ribonucleotide binding	354	3.82703	4.24797e-10	1226848, 1225595, 1220356, 1227404, 1224035, 1221504, 1213255, 1209254, 1213527, 1215625, 1220256, 1212382, 1210576, 1216752, 1224462, 1222069, 1213258, 1219886, 1223331, 1215244, 1217591, 1214770, 1220266, 1226838, 1224454, 1221406, 1223958, 1210588, 1225045, 1227185, 1209044, 1223435, 1211549, 1220779, 1224851, 1208189, 1205587, 1219616, 1224857, 1225189, 1225588, 1225435, 1224057, 1215608, 120…	2125	850	6610	1.29547	4.95314e-07	4.95314e-07	6.843e-07
GOTERM_MF_FAT	GO:0005524~ATP binding	351	3.79459	7.53421e-10	1226848, 1225595, 1220356, 1227404, 1224035, 1221504, 1213255, 1209254, 1213527, 1215625, 1220256, 1212382, 1210576, 1216752, 1224462, 1222069, 1213258, 1219886, 1223331, 1215244, 1217591, 1214770, 1220266, 1226838, 1224454, 1221406, 1223958, 1210588, 1225045, 1227185, 1209044, 1223435, 1211549, 1220779, 1224851, 1208189, 1205587, 1219616, 1224857, 1225189, 1225588, 1225435, 1224057, 1215608, 120…	2125	845	6610	1.29209	8.78488e-07	4.39244e-07	1.21367e-06
GOTERM_MF_FAT	GO:0030554~adenyl nucleotide binding	366	3.95676	4.63682e-09	1226848, 1225595, 1220356, 1227404, 1224035, 1221504, 1213255, 1209254, 1213527, 1215625, 1220158, 1220256, 1212382, 1210576, 1216752, 1224462, 1222069, 1213258, 1219886, 1223331, 1215244, 1217591, 1214770, 1220266, 1226838, 1224454, 1221406, 1223958, 1225689, 1210588, 1225045, 1227185, 1209044, 1223435, 1211549, 1220779, 1224851, 1208189, 1205587, 1219616, 1224857, 1225189, 1225588, 1225435, 122…	2125	898	6610	1.26779	5.40651e-06	1.80217e-06	7.46938e-06
GOTERM_MF_FAT	GO:0001883~purine nucleoside binding	367	3.96757	7.5618e-09	1226848, 1225595, 1220356, 1227404, 1224035, 1221504, 1213255, 1209254, 1213527, 1215625, 1220158, 1220256, 1212382, 1210576, 1216752, 1224462, 1222069, 1213258, 1219886, 1223331, 1215244, 1217591, 1214770, 1220266, 1226838, 1224454, 1221406, 1223958, 1225689, 1210588, 1225045, 1227185, 1209044, 1223435, 1211549, 1220779, 1224851, 1208189, 1205587, 1219616, 1224857, 1225189, 1225588, 1225435, 122…	2125	904	6610	1.26282	8.81702e-06	2.20426e-06	1.21812e-05
GOTERM_MF_FAT	GO:0001882~nucleoside binding	369	3.98919	7.9761e-09	1226848, 1225595, 1220356, 1227404, 1224035, 1221504, 1213255, 1209254, 1210391, 1213527, 1215625, 1220158, 1220256, 1212382, 1210576, 1216752, 1224462, 1222069, 1213258, 1219886, 1223331, 1215244, 1217591, 1214770, 1220266, 1226838, 1224454, 1221406, 1223958, 1225689, 1210588, 1225045, 1227185, 1209044, 1223435, 1211549, 1220779, 1224851, 1208189, 1205587, 1219616, 1224857, 1225189, 1225588, 122…	2125	910	6610	1.26133	9.30009e-06	1.86002e-06	1.28486e-05
GOTERM_MF_FAT	GO:0032555~purine ribonucleotide binding	414	4.47568	9.12778e-08	1226848, 1225595, 1227404, 1224035, 1221504, 1213255, 1212382, 1213258, 1222069, 1219886, 1215244, 1208914, 1214770, 1221406, 1226838, 1206962, 1225045, 1220779, 1224851, 1208189, 1205587, 1224857, 1219616, 1225189, 1225588, 1224190, 1221819, 1224057, 1224151, 1206180, 1224981, 1220177, 1218785, 1205165, 1211272, 1205472, 1213234, 1227666, 1220664, 1224059, 1214367, 1205075, 1224060, 1219734, 120…	2125	1055	6610	1.22065	0.000106424	1.77382e-05	0.000147038
GOTERM_MF_FAT	GO:0032553~ribonucleotide binding	414	4.47568	9.12778e-08	1226848, 1225595, 1227404, 1224035, 1221504, 1213255, 1212382, 1213258, 1222069, 1219886, 1215244, 1208914, 1214770, 1221406, 1226838, 1206962, 1225045, 1220779, 1224851, 1208189, 1205587, 1224857, 1219616, 1225189, 1225588, 1224190, 1221819, 1224057, 1224151, 1206180, 1224981, 1220177, 1218785, 1205165, 1211272, 1205472, 1213234, 1227666, 1220664, 1224059, 1214367, 1205075, 1224060, 1219734, 120…	2125	1055	6610	1.22065	0.000106424	1.77382e-05	0.000147038
GOTERM_MF_FAT	GO:0000166~nucleotide binding	499	5.39459	1.43974e-07	1226848, 1225595, 1221413, 1227685, 1227404, 1224035, 1213255, 1221504, 1220158, 1212382, 1222069, 1213258, 1219886, 1215244, 1208914, 1214770, 1226838, 1221406, 1225689, 1206962, 1225045, 1220779, 1224851, 1208189, 1205587, 1224857, 1219616, 1225189, 1225588, 1224190, 1221819, 1224057, 1224151, 1220177, 1206180, 1224981, 1218785, 1205165, 1211272, 1205472, 1213234, 1214252, 1214909, 1213900, 122…	2125	1304	6610	1.19032	0.000167859	2.39816e-05	0.000231925
GOTERM_MF_FAT	GO:0017076~purine nucleotide binding	426	4.60541	6.56219e-07	1226848, 1225595, 1227404, 1224035, 1221504, 1213255, 1220158, 1212382, 1213258, 1222069, 1219886, 1215244, 1208914, 1214770, 1221406, 1226838, 1225689, 1206962, 1225045, 1220779, 1224851, 1208189, 1205587, 1224857, 1219616, 1225189, 1225588, 1224190, 1221819, 1224057, 1224151, 1220177, 1206180, 1224981, 1218785, 1205165, 1211272, 1205472, 1213234, 1227666, 1218375, 1220664, 1224059, 1214367, 120…	2125	1105	6610	1.1992	0.000764858	9.56393e-05	0.00105709
GOTERM_MF_FAT	GO:0043169~cation binding	633	6.84324	7.92444e-06	1207146, 1227404, 1224035, 1207041, 1226173, 1221504, 1216308, 1218764, 1208825, 1220843, 1227543, 1214502, 1216506, 1208176, 1207956, 1212382, 1220649, 1213925, 1213258, 1226036, 1221706, 1221116, 1205592, 1213115, 1221119, 1211822, 1218494, 1218492, 1221803, 1211150, 1226939, 1212278, 1207056, 1205449, 1207547, 1211248, 1224955, 1225992, 1206014, 1221719, 1211832, 1215137, 1219895, 1221811, 122…	2125	1739	6610	1.13226	0.00919737	0.00102613	0.0127646
GOTERM_MF_FAT	GO:0060589~nucleoside-triphosphatase regulator activity	82	0.886486	8.17904e-06	1216993, 1225265, 1226272, 1207147, 1223234, 1208577, 1218935, 1213668, 1216444, 1220985, 1226794, 1208011, 1215464, 1217733, 1218041, 1212385, 1207295, 1205829, 1223429, 1209195, 1214850, 1218494, 1226982, 1215244, 1209281, 1205017, 1211779, 1222111, 1214305, 1209142, 1210585, 1216015, 1209972, 1225475, 1216360, 1225371, 1217790, 1211691, 1227311, 1223115, 1211133, 1225446, 1224403, 1223687, 120…	2125	168	6610	1.51826	0.00949147	0.000953225	0.0131747
GOTERM_MF_FAT	GO:0030695~GTPase regulator activity	80	0.864865	8.26832e-06	1216993, 1225265, 1226272, 1207147, 1223234, 1208577, 1218935, 1213668, 1216444, 1220985, 1226794, 1208011, 1215464, 1217733, 1218041, 1212385, 1207295, 1205829, 1223429, 1209195, 1214850, 1218494, 1226982, 1215244, 1209281, 1205017, 1211779, 1222111, 1209142, 1216015, 1209972, 1225475, 1216360, 1225371, 1217790, 1211691, 1227311, 1223115, 1211133, 1225446, 1224403, 1223687, 1208081, 1209516, 122…	2125	163	6610	1.52667	0.00959458	0.000876062	0.0133185
GOTERM_MF_FAT	GO:0043167~ion binding	635	6.86486	8.82535e-06	1207146, 1227404, 1224035, 1207041, 1226173, 1221504, 1216308, 1218764, 1208825, 1220843, 1227543, 1214502, 1216506, 1208176, 1207956, 1212382, 1220649, 1213925, 1213258, 1226036, 1221706, 1221116, 1205592, 1213115, 1221119, 1211822, 1218494, 1218492, 1221803, 1211150, 1226939, 1212278, 1207056, 1205449, 1207547, 1211248, 1224955, 1225992, 1206014, 1221719, 1211832, 1215137, 1219895, 1221811, 122…	2125	1746	6610	1.13128	0.0102376	0.000857166	0.0142157
GOTERM_MF_FAT	GO:0005201~extracellular matrix structural constituent	17	0.183784	1.44415e-05	1208093, 1222002, 1208696, 1211915, 1211160, 1222487, 1212180, 1219509, 1205631, 1223554, 1220547, 1217393, 1213314, 1205336, 1224394, 1216489, 1225414	2125	20	6610	2.644	0.0166979	0.00129446	0.023261
GOTERM_MF_FAT	GO:0046872~metal ion binding	622	6.72432	1.7609e-05	1207146, 1227404, 1224035, 1207041, 1226173, 1221504, 1216308, 1218764, 1208825, 1220843, 1227543, 1214502, 1216506, 1208176, 1207956, 1212382, 1220649, 1213925, 1213258, 1226036, 1221706, 1221116, 1205592, 1213115, 1221119, 1211822, 1218494, 1218492, 1221803, 1211150, 1226939, 1212278, 1207056, 1205449, 1207547, 1211248, 1224955, 1225992, 1206014, 1221719, 1211832, 1215137, 1219895, 1221811, 122…	2125	1715	6610	1.12816	0.0203229	0.00146552	0.0283623
GOTERM_MF_FAT	GO:0005509~calcium ion binding	171	1.84865	0.000105266	1212119, 1218764, 1213629, 1220253, 1208577, 1227011, 1213520, 1216155, 1217393, 1216506, 1207956, 1220649, 1225035, 1207253, 1211552, 1213925, 1223425, 1222541, 1221116, 1213115, 1205822, 1226556, 1218492, 1221896, 1205118, 1208507, 1226939, 1212064, 1222732, 1209243, 1216764, 1215825, 1206586, 1208379, 1211832, 1212069, 1224250, 1212877, 1217692, 1221811, 1215248, 1227254, 1213133, 1226821, 120…	2125	419	6610	1.26948	0.115512	0.00814973	0.169437
GOTERM_MF_FAT	GO:0004714~transmembrane receptor protein tyrosine kinase activity	32	0.345946	0.000105912	1222475, 1209309, 1218451, 1208062, 1208268, 1216440, 1212195, 1210805, 1225957, 1219886, 1222472, 1213587, 1224302, 1227524, 1208074, 1205075, 1210950, 1211165, 1225642, 1219734, 1225781, 1208414, 1207112, 1218138, 1226024, 1214479, 1206800, 1210929, 1224857, 1212952, 1225189, 1211062	2125	54	6610	1.84331	0.116178	0.007689	0.170475
GOTERM_MF_FAT	GO:0016887~ATPase activity	83	0.897297	0.000149544	1219988, 1222782, 1224035, 1221504, 1207598, 1213739, 1216068, 1205243, 1205088, 1227446, 1219837, 1212382, 1212309, 1221450, 1216752, 1213316, 1209015, 1209820, 1215832, 1210889, 1214746, 1214850, 1210357, 1211736, 1226976, 1224102, 1217591, 1227364, 1207406, 1212736, 1221406, 1226838, 1224454, 1215489, 1223958, 1210588, 1216762, 1227657, 1220299, 1210879, 1217768, 1220779, 1218997, 1222987, 122…	2125	182	6610	1.41856	0.160023	0.0102053	0.240626
GOTERM_MF_FAT	GO:0005216~ion channel activity	95	1.02703	0.000159795	1215429, 1210947, 1227058, 1214997, 1218450, 1217544, 1226173, 1208249, 1220848, 1211318, 1205690, 1206780, 1213520, 1218458, 1214407, 1226884, 1208175, 1220096, 1220451, 1206121, 1223425, 1220785, 1213316, 1205145, 1211656, 1225463, 1213115, 1224619, 1209385, 1216923, 1222732, 1221021, 1211879, 1218468, 1206159, 1220321, 1226080, 1224765, 1218899, 1221066, 1205110, 1208640, 1205946, 1227207, 121…	2125	214	6610	1.38087	0.170005	0.0102986	0.257101
GOTERM_MF_FAT	GO:0022838~substrate specific channel activity	95	1.02703	0.000195976	1215429, 1210947, 1227058, 1214997, 1218450, 1217544, 1226173, 1208249, 1220848, 1211318, 1205690, 1206780, 1213520, 1218458, 1214407, 1226884, 1208175, 1220096, 1220451, 1206121, 1223425, 1220785, 1213316, 1205145, 1211656, 1225463, 1213115, 1224619, 1209385, 1216923, 1222732, 1221021, 1211879, 1218468, 1206159, 1220321, 1226080, 1224765, 1218899, 1221066, 1205110, 1208640, 1205946, 1227207, 121…	2125	215	6610	1.37445	0.204298	0.0119559	0.315228
GOTERM_MF_FAT	GO:0003779~actin binding	52	0.562162	0.000223892	1220198, 1219128, 1220054, 1211418, 1211316, 1206128, 1215625, 1223883, 1212017, 1213115, 1212940, 1216492, 1221896, 1213442, 1210315, 1218131, 1227361, 1207407, 1211281, 1208604, 1206771, 1224310, 1214305, 1205157, 1227463, 1213070, 1227254, 1227257, 1221958, 1227295, 1206180, 1206740, 1220936, 1211533, 1207573, 1226861, 1218676, 1212260, 1212264, 1227490, 1211070, 1215516, 1215415, 1205171, 122…	2125	104	6610	1.55529	0.229786	0.0129695	0.360054
GOTERM_MF_FAT	GO:0015267~channel activity	95	1.02703	0.000239498	1215429, 1210947, 1227058, 1214997, 1218450, 1217544, 1226173, 1208249, 1220848, 1211318, 1205690, 1206780, 1213520, 1218458, 1214407, 1226884, 1208175, 1220096, 1220451, 1206121, 1223425, 1220785, 1213316, 1205145, 1211656, 1225463, 1213115, 1224619, 1209385, 1216923, 1222732, 1221021, 1211879, 1218468, 1206159, 1220321, 1226080, 1224765, 1218899, 1221066, 1205110, 1208640, 1205946, 1227207, 121…	2125	216	6610	1.36808	0.243678	0.0132114	0.385106
GOTERM_MF_FAT	GO:0022803~passive transmembrane transporter activity	95	1.02703	0.000239498	1215429, 1210947, 1227058, 1214997, 1218450, 1217544, 1226173, 1208249, 1220848, 1211318, 1205690, 1206780, 1213520, 1218458, 1214407, 1226884, 1208175, 1220096, 1220451, 1206121, 1223425, 1220785, 1213316, 1205145, 1211656, 1225463, 1213115, 1224619, 1209385, 1216923, 1222732, 1221021, 1211879, 1218468, 1206159, 1220321, 1226080, 1224765, 1218899, 1221066, 1205110, 1208640, 1205946, 1227207, 121…	2125	216	6610	1.36808	0.243678	0.0132114	0.385106
GOTERM_MF_FAT	GO:0005262~calcium channel activity	22	0.237838	0.000351659	1227207, 1218450, 1209385, 1211855, 1227027, 1208249, 1222732, 1221021, 1211879, 1213520, 1206159, 1213856, 1210102, 1225764, 1220451, 1223425, 1220785, 1222414, 1218899, 1214690, 1220002, 1221828	2125	34	6610	2.01273	0.33642	0.0184685	0.56498
GOTERM_MF_FAT	GO:0019899~enzyme binding	49	0.52973	0.000472591	1225265, 1225466, 1205694, 1213290, 1221503, 1226171, 1216440, 1217589, 1214502, 1206766, 1209820, 1205829, 1225099, 1214850, 1225423, 1216119, 1205190, 1220520, 1205017, 1208958, 1227364, 1208470, 1225942, 1205157, 1227463, 1220634, 1209767, 1217240, 1225371, 1223687, 1208262, 1221125, 1219818, 1213234, 1211533, 1205604, 1218676, 1220349, 1221420, 1205039, 1226583, 1206795, 1212187, 1207067, 122…	2125	99	6610	1.53958	0.423726	0.0236791	0.758578
GOTERM_MF_FAT	GO:0008092~cytoskeletal protein binding	73	0.789189	0.000485245	1220198, 1225369, 1219128, 1220054, 1211418, 1207146, 1211316, 1226171, 1206128, 1215625, 1223883, 1217193, 1212017, 1213115, 1212940, 1216492, 1224106, 1213442, 1221896, 1210315, 1219427, 1218131, 1207803, 1227361, 1211281, 1207407, 1208604, 1206771, 1224454, 1224310, 1214305, 1205157, 1227463, 1225438, 1213070, 1213776, 1227254, 1206642, 1221958, 1227257, 1208082, 1227295, 1206180, 1216137, 120…	2125	161	6610	1.41039	0.43217	0.0233047	0.778815
GOTERM_MF_FAT	GO:0005083~small GTPase regulator activity	54	0.583784	0.00112641	1216993, 1225265, 1226272, 1223234, 1208577, 1213668, 1218935, 1208011, 1215464, 1217733, 1218041, 1212385, 1207295, 1226982, 1218494, 1215244, 1209281, 1222111, 1209142, 1209972, 1225475, 1211691, 1217790, 1211133, 1224403, 1208081, 1209516, 1226438, 1219217, 1223097, 1222563, 1214080, 1222349, 1221235, 1221367, 1221420, 1205039, 1209897, 1221778, 1224023, 1226583, 1220209, 1209544, 1226403, 120…	2125	115	6610	1.46062	0.731292	0.0512076	1.79915
GOTERM_MF_FAT	GO:0005089~Rho guanyl-nucleotide exchange factor activity	24	0.259459	0.00126245	1216993, 1211133, 1226272, 1209281, 1224403, 1224023, 1209544, 1223234, 1222111, 1208577, 1226403, 1225661, 1223097, 1214080, 1215464, 1218041, 1218305, 1215744, 1212385, 1217907, 1221235, 1217790, 1226982, 1221367	2125	41	6610	1.82083	0.770752	0.0550771	2.01439
GOTERM_MF_FAT	GO:0004672~protein kinase activity	145	1.56757	0.00126466	1226848, 1220356, 1227404, 1209309, 1208062, 1209254, 1212195, 1220256, 1210576, 1224462, 1222547, 1213258, 1222069, 1220808, 1219886, 1211656, 1222444, 1217936, 1224755, 1222447, 1215244, 1212066, 1208958, 1225781, 1209044, 1227185, 1206113, 1226765, 1223629, 1223816, 1224857, 1225189, 1213444, 1206642, 1215608, 1225772, 1210753, 1224981, 1222627, 1211272, 1223253, 1214045, 1213234, 1218725, 122…	2125	364	6610	1.23911	0.771341	0.0531825	2.01787
GOTERM_MF_FAT	GO:0004114~3',5'-cyclic-nucleotide phosphodiesterase activity	13	0.140541	0.00128771	1214700, 1218592, 1217483, 1211778, 1224189, 1213290, 1220546, 1211588, 1216136, 1220525, 1206690, 1213411, 1206909	2125	17	6610	2.37869	0.777413	0.0522442	2.05429
GOTERM_MF_FAT	GO:0035091~phosphoinositide binding	26	0.281081	0.00145346	1226517, 1219889, 1211235, 1210139, 1211924, 1227640, 1206672, 1216020, 1209960, 1223328, 1217663, 1224755, 1210667, 1218295, 1216947, 1212187, 1214889, 1206731, 1217181, 1209977, 1214245, 1224372, 1227488, 1207346, 1212873, 1211061	2125	46	6610	1.75816	0.816579	0.0568046	2.31583
GOTERM_MF_FAT	GO:0005085~guanyl-nucleotide exchange factor activity	37	0.4	0.00159199	1216993, 1211133, 1226272, 1223687, 1224403, 1223234, 1208577, 1218935, 1221125, 1223097, 1226794, 1215464, 1214080, 1218041, 1212385, 1205829, 1223429, 1226536, 1221235, 1221367, 1226982, 1209281, 1205017, 1224023, 1222111, 1209544, 1226403, 1225661, 1226780, 1218305, 1215744, 1216015, 1217907, 1217670, 1225371, 1227311, 1217790	2125	73	6610	1.5766	0.843975	0.0600463	2.5339
GOTERM_MF_FAT	GO:0008134~transcription factor binding	44	0.475676	0.00175173	1221053, 1225241, 1207041, 1225323, 1226093, 1225963, 1212364, 1217589, 1214808, 1224949, 1220121, 1219863, 1213353, 1206766, 1224963, 1206243, 1225177, 1225387, 1227193, 1225423, 1206974, 1221725, 1213702, 1220349, 1220520, 1212089, 1215550, 1212278, 1226263, 1205402, 1205405, 1212631, 1227550, 1211933, 1227630, 1207172, 1212002, 1225942, 1219241, 1218382, 1224836, 1219735, 1225722, 1205659	2125	91	6610	1.50402	0.87053	0.063818	2.7848
GOTERM_MF_FAT	GO:0005088~Ras guanyl-nucleotide exchange factor activity	24	0.259459	0.0019514	1216993, 1211133, 1226272, 1209281, 1224403, 1224023, 1209544, 1223234, 1222111, 1208577, 1226403, 1225661, 1223097, 1214080, 1215464, 1218041, 1218305, 1215744, 1212385, 1217907, 1221235, 1217790, 1226982, 1221367	2125	42	6610	1.77748	0.897465	0.0686996	3.09756
GOTERM_MF_FAT	GO:0008081~phosphoric diester hydrolase activity	24	0.259459	0.0019514	1214700, 1218592, 1215153, 1217483, 1223190, 1211778, 1221934, 1213025, 1224189, 1213290, 1220546, 1213037, 1211588, 1219117, 1207952, 1216136, 1220525, 1206690, 1220808, 1213411, 1210624, 1221753, 1206909, 1224148	2125	42	6610	1.77748	0.897465	0.0686996	3.09756
GOTERM_MF_FAT	GO:0005543~phospholipid binding	31	0.335135	0.00208694	1226517, 1205365, 1219889, 1205660, 1211235, 1210139, 1213331, 1211924, 1227640, 1222225, 1206672, 1216020, 1209960, 1223328, 1217663, 1224755, 1210667, 1218295, 1216947, 1219674, 1206731, 1214889, 1212187, 1217181, 1209977, 1224372, 1214245, 1227488, 1207346, 1212873, 1211061	2125	59	6610	1.63438	0.912482	0.071157	3.30933
GOTERM_MF_FAT	GO:0051020~GTPase binding	16	0.172973	0.00211181	1221420, 1225265, 1205039, 1205017, 1223687, 1226583, 1221125, 1206795, 1222232, 1205157, 1205829, 1218676, 1217240, 1225371, 1214850, 1227536	2125	24	6610	2.07373	0.914989	0.0699336	3.34815
GOTERM_MF_FAT	GO:0005244~voltage-gated ion channel activity	45	0.486486	0.00254592	1212320, 1227058, 1218450, 1217544, 1221765, 1215309, 1213520, 1218458, 1214407, 1213856, 1226884, 1211700, 1206390, 1215300, 1223425, 1205476, 1216334, 1213115, 1225463, 1211656, 1206830, 1217755, 1224117, 1206843, 1227027, 1211855, 1222309, 1216923, 1206320, 1221021, 1211879, 1206159, 1218468, 1222516, 1226080, 1218899, 1213651, 1221066, 1221839, 1214690, 1208640, 1220447, 1205946, 1227481, 120…	2125	95	6610	1.47344	0.948816	0.0814177	4.02325
GOTERM_MF_FAT	GO:0022832~voltage-gated channel activity	45	0.486486	0.00254592	1212320, 1227058, 1218450, 1217544, 1221765, 1215309, 1213520, 1218458, 1214407, 1213856, 1226884, 1211700, 1206390, 1215300, 1223425, 1205476, 1216334, 1213115, 1225463, 1211656, 1206830, 1217755, 1224117, 1206843, 1227027, 1211855, 1222309, 1216923, 1206320, 1221021, 1211879, 1206159, 1218468, 1222516, 1226080, 1218899, 1213651, 1221066, 1221839, 1214690, 1208640, 1220447, 1205946, 1227481, 120…	2125	95	6610	1.47344	0.948816	0.0814177	4.02325
GOTERM_MF_FAT	GO:0000287~magnesium ion binding	51	0.551351	0.00279232	1226518, 1219988, 1212152, 1227404, 1224035, 1224691, 1221504, 1215166, 1227543, 1212382, 1216752, 1209914, 1209015, 1213115, 1227470, 1212247, 1207487, 1214572, 1211696, 1220390, 1207406, 1214967, 1223228, 1226729, 1225901, 1211604, 1221954, 1226302, 1216835, 1222595, 1220230, 1215440, 1225483, 1219955, 1221561, 1206601, 1224440, 1210558, 1210416, 1219445, 1220991, 1207691, 1216102, 1227346, 121…	2125	111	6610	1.42919	0.961627	0.0865866	4.40446
GOTERM_MF_FAT	GO:0003887~DNA-directed DNA polymerase activity	12	0.12973	0.00288336	1226974, 1223586, 1205201, 1226484, 1217711, 1225562, 1216337, 1210391, 1210558, 1222987, 1227543, 1210386	2125	16	6610	2.33294	0.965502	0.0869788	4.54495
GOTERM_MF_FAT	GO:0005003~ephrin receptor activity	11	0.118919	0.00294776	1226024, 1205075, 1209309, 1219734, 1208062, 1208268, 1224302, 1208414, 1225189, 1211062, 1210805	2125	14	6610	2.44403	0.968005	0.0866018	4.64422
GOTERM_MF_FAT	GO:0046873~metal ion transmembrane transporter activity	71	0.767568	0.00316627	1221412, 1227058, 1218450, 1217544, 1226173, 1218742, 1208249, 1220848, 1213520, 1218458, 1214407, 1226884, 1208175, 1225852, 1220096, 1220451, 1220785, 1209015, 1223425, 1213115, 1225463, 1211656, 1209385, 1222732, 1221021, 1211879, 1206159, 1218468, 1222841, 1220299, 1224765, 1218899, 1208640, 1211604, 1227207, 1221954, 1212320, 1216633, 1221765, 1212622, 1215309, 1211362, 1219818, 1213856, 121…	2125	165	6610	1.3385	0.97522	0.0904574	4.98029
GOTERM_MF_FAT	GO:0004713~protein tyrosine kinase activity	49	0.52973	0.00371134	1222475, 1209309, 1208062, 1218451, 1216440, 1212195, 1210805, 1225957, 1219886, 1222472, 1224755, 1225642, 1225781, 1209087, 1207112, 1218138, 1226765, 1218900, 1220737, 1214479, 1224857, 1225189, 1210929, 1206642, 1215608, 1210796, 1205748, 1208268, 1214428, 1222595, 1225772, 1211272, 1215440, 1219413, 1213587, 1224302, 1227524, 1208074, 1205075, 1210950, 1211165, 1219734, 1208414, 1209816, 122…	2125	107	6610	1.42447	0.986904	0.10272	5.81382
GOTERM_MF_FAT	GO:0008047~enzyme activator activity	45	0.486486	0.00414825	1223115, 1225446, 1207147, 1208081, 1209516, 1225146, 1214461, 1213668, 1220985, 1216444, 1226438, 1219217, 1208011, 1222563, 1217733, 1205604, 1209195, 1214850, 1222349, 1214015, 1218494, 1208655, 1205039, 1215244, 1209897, 1221778, 1220049, 1220209, 1211779, 1213167, 1214305, 1211813, 1214980, 1217418, 1209142, 1210585, 1210248, 1217907, 1209972, 1216360, 1207268, 1210469, 1221399, 1211691, 120…	2125	97	6610	1.44306	0.992148	0.111497	6.47698
GOTERM_MF_FAT	GO:0022836~gated channel activity	71	0.767568	0.0045141	1227058, 1214997, 1218450, 1217544, 1226173, 1208249, 1211318, 1213520, 1206780, 1218458, 1214407, 1226884, 1223425, 1220785, 1211656, 1225463, 1213115, 1209385, 1216923, 1222732, 1221021, 1211879, 1206159, 1218468, 1220321, 1226080, 1224765, 1218899, 1221066, 1205110, 1208640, 1205946, 1212320, 1223213, 1221765, 1215309, 1213856, 1215953, 1215300, 1211700, 1206390, 1205476, 1216334, 1206830, 121…	2125	167	6610	1.32247	0.994884	0.118036	7.0289
GOTERM_MF_FAT	GO:0005096~GTPase activator activity	37	0.4	0.00498498	1223115, 1225446, 1207147, 1208081, 1209516, 1225146, 1214461, 1213668, 1220985, 1216444, 1226438, 1219217, 1208011, 1217733, 1222563, 1209195, 1222349, 1214850, 1218494, 1205039, 1215244, 1209897, 1220049, 1221778, 1211779, 1220209, 1211813, 1214980, 1209142, 1217418, 1210248, 1217907, 1209972, 1216360, 1207268, 1210469, 1211691	2125	77	6610	1.4947	0.997053	0.126731	7.7348
GOTERM_MF_FAT	GO:0005516~calmodulin binding	17	0.183784	0.00539431	1227254, 1221954, 1210315, 1217956, 1218131, 1212578, 1205735, 1227346, 1222732, 1215625, 1206180, 1225764, 1205701, 1214909, 1212260, 1212940, 1227490	2125	28	6610	1.88857	0.998176	0.133537	8.34433
GOTERM_MF_FAT	GO:0008066~glutamate receptor activity	12	0.12973	0.00580873	1214997, 1223213, 1211572, 1222732, 1215698, 1211318, 1222072, 1220321, 1213196, 1205011, 1215953, 1218214	2125	17	6610	2.19571	0.998878	0.140109	8.9576
GOTERM_MF_FAT	GO:0005234~extracellular-glutamate-gated ion channel activity	11	0.118919	0.00630517	1214997, 1223213, 1211572, 1222732, 1215698, 1211318, 1222072, 1220321, 1213196, 1215953, 1218214	2125	15	6610	2.2811	0.999373	0.148136	9.68717
GOTERM_MF_FAT	GO:0004970~ionotropic glutamate receptor activity	11	0.118919	0.00630517	1214997, 1223213, 1211572, 1222732, 1215698, 1211318, 1222072, 1220321, 1213196, 1215953, 1218214	2125	15	6610	2.2811	0.999373	0.148136	9.68717
GOTERM_MF_FAT	GO:0005245~voltage-gated calcium channel activity	11	0.118919	0.00630517	1223425, 1218450, 1211855, 1227027, 1218899, 1221021, 1214690, 1206159, 1213520, 1211879, 1213856	2125	15	6610	2.2811	0.999373	0.148136	9.68717
GOTERM_MF_FAT	GO:0008237~metallopeptidase activity	48	0.518919	0.00660822	1212117, 1213133, 1216778, 1213112, 1225466, 1213624, 1222784, 1208945, 1222574, 1225793, 1207024, 1205743, 1209081, 1212823, 1215497, 1209055, 1218437, 1219415, 1223327, 1227593, 1227200, 1210972, 1217841, 1215550, 1208583, 1205210, 1210475, 1223400, 1215319, 1219190, 1206155, 1224162, 1223285, 1221298, 1221132, 1211578, 1226895, 1224166, 1212439, 1211898, 1225215, 1218778, 1221594, 1224313, 122…	2125	107	6610	1.3954	0.999561	0.151669	10.1298
GOTERM_MF_FAT	GO:0008270~zinc ion binding	342	3.6973	0.006655	1212117, 1207146, 1213624, 1220354, 1209925, 1207041, 1209436, 1213525, 1223748, 1216759, 1216308, 1208825, 1220843, 1220256, 1214502, 1208176, 1224464, 1215620, 1209055, 1218101, 1211551, 1213258, 1221706, 1218202, 1206438, 1221119, 1211822, 1223327, 1217091, 1218494, 1227195, 1211150, 1221803, 1210972, 1205830, 1208583, 1212278, 1216626, 1213635, 1207056, 1205429, 1205428, 1217490, 1205449, 122…	2125	956	6610	1.11278	0.999584	0.14973	10.198
GOTERM_MF_FAT	GO:0016791~phosphatase activity	57	0.616216	0.00777887	1212191, 1214409, 1205084, 1217489, 1215166, 1212609, 1206767, 1227470, 1217095, 1225758, 1207252, 1212247, 1207487, 1207449, 1205214, 1206340, 1223912, 1227458, 1214967, 1220822, 1223228, 1208995, 1211504, 1225046, 1214815, 1206820, 1225085, 1207641, 1225539, 1214835, 1222008, 1212621, 1222691, 1220230, 1211633, 1221561, 1207649, 1224081, 1205502, 1224945, 1225442, 1223698, 1207461, 1214326, 122…	2125	132	6610	1.34321	0.999889	0.169585	11.8208
GOTERM_MF_FAT	GO:0005261~cation channel activity	60	0.648649	0.00903831	1227058, 1218450, 1217544, 1226173, 1208249, 1220848, 1213520, 1218458, 1214407, 1226884, 1208175, 1220451, 1220096, 1220785, 1223425, 1213115, 1225463, 1211656, 1209385, 1222732, 1221021, 1211879, 1206159, 1218468, 1218899, 1224765, 1208640, 1227207, 1212320, 1216633, 1221765, 1215309, 1219818, 1213856, 1210102, 1211700, 1215300, 1205476, 1216334, 1206830, 1217755, 1220002, 1221828, 1215400, 120…	2125	141	6610	1.32365	0.999975	0.190818	13.6066
GOTERM_MF_FAT	GO:0004112~cyclic-nucleotide phosphodiesterase activity	13	0.140541	0.00935558	1214700, 1218592, 1217483, 1211778, 1224189, 1213290, 1220546, 1211588, 1216136, 1220525, 1206690, 1213411, 1206909	2125	20	6610	2.02188	0.999983	0.193379	14.0511
GOTERM_MF_FAT	GO:0003777~microtubule motor activity	20	0.216216	0.011595	1214367, 1210280, 1226976, 1224200, 1217591, 1207200, 1220266, 1218134, 1220897, 1207223, 1210267, 1227421, 1208533, 1205800, 1210879, 1224851, 1227666, 1217663, 1225395, 1205102	2125	37	6610	1.6814	0.999999	0.230116	17.1281
GOTERM_MF_FAT	GO:0003712~transcription cofactor activity	24	0.259459	0.0118791	1220349, 1213702, 1221053, 1220520, 1215550, 1212278, 1226263, 1225323, 1205402, 1227550, 1205405, 1225963, 1212364, 1207172, 1220121, 1218382, 1206766, 1224836, 1219735, 1225177, 1206243, 1225387, 1225722, 1205659	2125	47	6610	1.58839	0.999999	0.231186	17.511
GOTERM_MF_FAT	GO:0016563~transcription activator activity	40	0.432432	0.0132202	1224770, 1221053, 1208082, 1225963, 1212364, 1210091, 1217589, 1218092, 1213339, 1220121, 1209961, 1206766, 1209863, 1225177, 1225387, 1218417, 1219609, 1225423, 1226614, 1220349, 1227314, 1220520, 1216946, 1215550, 1226263, 1212631, 1227630, 1214816, 1205711, 1218382, 1227463, 1224836, 1219735, 1207926, 1219975, 1215982, 1225722, 1206564, 1205659, 1223020	2125	89	6610	1.39802	1	0.249761	19.2961
GOTERM_MF_FAT	GO:0043492~ATPase activity, coupled to movement of substances	32	0.345946	0.0135502	1221954, 1219988, 1222782, 1224035, 1221504, 1207598, 1213739, 1224151, 1224906, 1205088, 1212382, 1212309, 1216752, 1225483, 1209015, 1213316, 1209820, 1214850, 1215547, 1220991, 1214514, 1221406, 1208523, 1210588, 1212098, 1216762, 1227657, 1220299, 1207758, 1220779, 1211604, 1219616	2125	68	6610	1.46381	1	0.251159	19.7297
GOTERM_MF_FAT	GO:0042623~ATPase activity, coupled	62	0.67027	0.0137005	1219988, 1222782, 1224035, 1221504, 1207598, 1213739, 1216068, 1205243, 1205088, 1227446, 1212382, 1212309, 1221450, 1216752, 1213316, 1209015, 1209820, 1215832, 1214746, 1214850, 1210357, 1224102, 1227364, 1212736, 1226838, 1224454, 1221406, 1215489, 1223958, 1210588, 1216762, 1227657, 1220299, 1217768, 1220779, 1222987, 1205587, 1211604, 1219616, 1221954, 1218818, 1210207, 1227295, 1224151, 122…	2125	149	6610	1.29434	1	0.249666	19.9265
GOTERM_MF_FAT	GO:0003774~motor activity	41	0.443243	0.0141578	1224200, 1227295, 1213527, 1220538, 1215625, 1220177, 1206180, 1223253, 1213788, 1227421, 1208533, 1222569, 1205800, 1227666, 1217663, 1205102, 1227490, 1223331, 1210315, 1214367, 1210280, 1226976, 1217591, 1217495, 1218131, 1207200, 1222750, 1220266, 1218134, 1220897, 1222650, 1224472, 1214345, 1207223, 1210267, 1207220, 1210879, 1219307, 1224851, 1225395, 1210524	2125	92	6610	1.38624	1	0.252996	20.5225
GOTERM_MF_FAT	GO:0022843~voltage-gated cation channel activity	36	0.389189	0.0151394	1212320, 1227058, 1218450, 1217544, 1221765, 1215309, 1213520, 1218458, 1214407, 1213856, 1226884, 1215300, 1211700, 1223425, 1205476, 1216334, 1211656, 1225463, 1213115, 1206830, 1217755, 1206843, 1227027, 1211855, 1222309, 1206320, 1221021, 1211879, 1206159, 1218468, 1222516, 1218899, 1213651, 1214690, 1208640, 1227481	2125	79	6610	1.41748	1	0.264115	21.7877
GOTERM_MF_FAT	GO:0004012~phospholipid-translocating ATPase activity	8	0.0864865	0.0158162	1212382, 1219988, 1225483, 1216752, 1220991, 1227657, 1224035, 1221504	2125	10	6610	2.48847	1	0.270262	22.649
GOTERM_MF_FAT	GO:0015247~aminophospholipid transporter activity	8	0.0864865	0.0158162	1212382, 1219988, 1225483, 1216752, 1220991, 1227657, 1224035, 1221504	2125	10	6610	2.48847	1	0.270262	22.649
GOTERM_MF_FAT	GO:0003713~transcription coactivator activity	15	0.162162	0.0176538	1220349, 1221053, 1220520, 1215550, 1226263, 1225963, 1212364, 1220121, 1218382, 1206766, 1224836, 1225177, 1225387, 1225722, 1205659	2125	26	6610	1.79457	1	0.292584	24.943
GOTERM_MF_FAT	GO:0004386~helicase activity	40	0.432432	0.0198296	1210207, 1205243, 1216068, 1215933, 1218785, 1227446, 1221450, 1215832, 1227119, 1214746, 1224265, 1207605, 1219769, 1224758, 1208460, 1210357, 1219445, 1207581, 1207703, 1212089, 1224102, 1216645, 1220293, 1207964, 1212736, 1226838, 1224473, 1222394, 1209070, 1223958, 1225924, 1219260, 1217768, 1219975, 1222987, 1213485, 1205587, 1220653, 1225588, 1214713	2125	91	6610	1.36729	1	0.318083	27.5767
GOTERM_MF_FAT	GO:0001948~glycoprotein binding	9	0.0972973	0.0276728	1225697, 1209608, 1224990, 1216671, 1220634, 1219598, 1209854, 1216489, 1218379	2125	13	6610	2.15348	1	0.410077	36.3685
GOTERM_MF_FAT	GO:0042626~ATPase activity, coupled to transmembrane movement of substances	30	0.324324	0.0288133	1219988, 1221954, 1222782, 1224035, 1221504, 1207598, 1213739, 1224151, 1224906, 1205088, 1212382, 1212309, 1225483, 1216752, 1209015, 1213316, 1209820, 1215547, 1220991, 1214514, 1221406, 1208523, 1210588, 1212098, 1216762, 1220299, 1207758, 1220779, 1211604, 1219616	2125	66	6610	1.4139	1	0.417897	37.5602
GOTERM_MF_FAT	GO:0016879~ligase activity, forming carbon-nitrogen bonds	45	0.486486	0.0302751	1216933, 1211438, 1227232, 1226203, 1213255, 1210672, 1218720, 1209510, 1226882, 1221740, 1218195, 1213680, 1206930, 1216974, 1221213, 1222909, 1227301, 1219055, 1221803, 1205212, 1220349, 1205190, 1210217, 1206347, 1205093, 1224559, 1216284, 1225006, 1210669, 1222653, 1214039, 1212459, 1211938, 1216075, 1214127, 1216840, 1211260, 1213304, 1226492, 1214558, 1219903, 1219895, 1213461, 1205562, 122…	2125	107	6610	1.30819	1	0.428846	39.0571
GOTERM_MF_FAT	GO:0005548~phospholipid transporter activity	8	0.0864865	0.0315292	1212382, 1219988, 1225483, 1216752, 1220991, 1227657, 1224035, 1221504	2125	11	6610	2.26225	1	0.437122	40.3143
GOTERM_MF_FAT	GO:0031267~small GTPase binding	11	0.118919	0.0336499	1205039, 1225265, 1221420, 1222232, 1205157, 1218676, 1226583, 1217240, 1214850, 1227536, 1206795	2125	18	6610	1.90092	1	0.453769	42.3852
GOTERM_MF_FAT	GO:0004003~ATP-dependent DNA helicase activity	7	0.0756757	0.0354018	1212089, 1216645, 1217768, 1205587, 1219769, 1218785, 1210357	2125	9	6610	2.41935	1	0.46595	44.0449
GOTERM_MF_FAT	GO:0004402~histone acetyltransferase activity	7	0.0756757	0.0354018	1221053, 1220520, 1206766, 1225963, 1212364, 1214638, 1207604	2125	9	6610	2.41935	1	0.46595	44.0449
GOTERM_MF_FAT	GO:0004468~lysine N-acetyltransferase activity	7	0.0756757	0.0354018	1221053, 1220520, 1206766, 1225963, 1212364, 1214638, 1207604	2125	9	6610	2.41935	1	0.46595	44.0449
GOTERM_MF_FAT	GO:0008276~protein methyltransferase activity	10	0.108108	0.0396199	1214241, 1222829, 1205830, 1211774, 1209621, 1222160, 1214004, 1217432, 1223280, 1220196	2125	16	6610	1.94412	1	0.500021	47.859
GOTERM_MF_FAT	GO:0003682~chromatin binding	26	0.281081	0.0414547	1211212, 1209925, 1208082, 1210391, 1214782, 1212364, 1219831, 1214045, 1206023, 1205822, 1209698, 1208460, 1224758, 1216119, 1226614, 1215554, 1207703, 1227550, 1227630, 1216414, 1226446, 1216887, 1219975, 1214004, 1213485, 1218404	2125	57	6610	1.41886	1	0.511032	49.4408
GOTERM_MF_FAT	GO:0046914~transition metal ion binding	406	4.38919	0.0422214	1227404, 1207146, 1207041, 1216308, 1220843, 1208825, 1214502, 1208176, 1226036, 1213258, 1221706, 1221119, 1211822, 1218494, 1211150, 1221803, 1212278, 1207056, 1205449, 1207547, 1211248, 1224955, 1225992, 1206014, 1221719, 1215137, 1219895, 1225588, 1213133, 1221053, 1206834, 1208945, 1205167, 1225963, 1218781, 1215007, 1218475, 1224988, 1208983, 1214668, 1221233, 1208987, 1224058, 1205571, 120…	2125	1180	6610	1.07025	1	0.51255	50.0883
GOTERM_MF_FAT	GO:0003678~DNA helicase activity	9	0.0972973	0.0466786	1212089, 1219260, 1216645, 1217768, 1224265, 1205587, 1219769, 1218785, 1210357	2125	14	6610	1.99966	1	0.543903	53.7012
GOTERM_MF_FAT	GO:0015662~ATPase activity, coupled to transmembrane movement of ions, phosphorylative mechanism	17	0.183784	0.0489775	1221954, 1219988, 1220991, 1224035, 1214514, 1221504, 1224151, 1212382, 1208523, 1212098, 1216762, 1216752, 1225483, 1209015, 1209820, 1220299, 1211604	2125	34	6610	1.55529	1	0.556583	55.4673
GOTERM_MF_FAT	GO:0016820~hydrolase activity, acting on acid anhydrides, catalyzing transmembrane movement of substances	30	0.324324	0.0527024	1219988, 1221954, 1222782, 1224035, 1221504, 1207598, 1213739, 1224151, 1224906, 1205088, 1212382, 1212309, 1225483, 1216752, 1209015, 1213316, 1209820, 1215547, 1220991, 1214514, 1221406, 1208523, 1210588, 1212098, 1216762, 1220299, 1207758, 1220779, 1211604, 1219616	2125	69	6610	1.35243	1	0.578859	58.1954
GOTERM_MF_FAT	GO:0042054~histone methyltransferase activity	8	0.0864865	0.0550079	1214241, 1222829, 1205830, 1209621, 1222160, 1214004, 1217432, 1220196	2125	12	6610	2.07373	1	0.589958	59.8046
GOTERM_MF_FAT	GO:0004674~protein serine/threonine kinase activity	86	0.92973	0.0592	1226848, 1226518, 1212152, 1226272, 1220356, 1227404, 1205009, 1217773, 1225323, 1209254, 1226591, 1220256, 1210576, 1209963, 1222547, 1224462, 1211093, 1222069, 1213258, 1220808, 1208343, 1222444, 1217936, 1227302, 1220425, 1211696, 1205018, 1225285, 1212066, 1208958, 1219567, 1215288, 1220295, 1227185, 1209044, 1206113, 1226729, 1223816, 1225475, 1213444, 1215180, 1217956, 1226302, 1211740, 121…	2125	229	6610	1.16817	1	0.612768	62.5827
GOTERM_MF_FAT	GO:0017016~Ras GTPase binding	10	0.108108	0.0607197	1205039, 1225265, 1221420, 1222232, 1205157, 1218676, 1226583, 1214850, 1227536, 1206795	2125	17	6610	1.82976	1	0.617509	63.5446
GOTERM_MF_FAT	GO:0004222~metalloendopeptidase activity	29	0.313514	0.0721448	1213133, 1212117, 1216778, 1225466, 1213624, 1213112, 1222784, 1225793, 1207024, 1212823, 1209055, 1223327, 1219415, 1227593, 1210972, 1217841, 1210475, 1219190, 1223400, 1224162, 1221132, 1211578, 1224166, 1225215, 1221594, 1224313, 1224978, 1220084, 1218212	2125	68	6610	1.32657	1	0.678221	70.0675
GOTERM_MF_FAT	GO:0008170~N-methyltransferase activity	9	0.0972973	0.0724961	1214241, 1222829, 1205830, 1209621, 1205405, 1222160, 1214004, 1217432, 1220196	2125	15	6610	1.86635	1	0.675353	70.2495
GOTERM_MF_FAT	GO:0015631~tubulin binding	11	0.118919	0.0734383	1206642, 1213339, 1208082, 1215755, 1207803, 1205332, 1226171, 1216348, 1222718, 1224454, 1224310	2125	20	6610	1.71082	1	0.675599	70.7327
GOTERM_MF_FAT	GO:0034061~DNA polymerase activity	16	0.172973	0.0753083	1226974, 1223586, 1205201, 1226484, 1225562, 1216337, 1214976, 1210391, 1220538, 1223897, 1227543, 1221655, 1217711, 1210558, 1222987, 1210386	2125	33	6610	1.50816	1	0.680548	71.6698
GOTERM_MF_FAT	GO:0003993~acid phosphatase activity	6	0.0648649	0.0760764	1212191, 1207649, 1223912, 1215847, 1211750, 1225085	2125	8	6610	2.33294	1	0.679868	72.0465
GOTERM_MF_FAT	GO:0008509~anion transmembrane transporter activity	23	0.248649	0.0787163	1213633, 1224783, 1221188, 1216923, 1225646, 1227509, 1226080, 1206390, 1213316, 1218499, 1206739, 1220760, 1207060, 1205619, 1215916, 1221066, 1205110, 1226345, 1221839, 1205946, 1220447, 1224117, 1205512	2125	52	6610	1.37584	1	0.688332	73.3057
GOTERM_MF_FAT	GO:0003702~RNA polymerase II transcription factor activity	23	0.248649	0.0787163	1227137, 1213702, 1225819, 1207467, 1208124, 1211416, 1226263, 1208082, 1216645, 1212631, 1227550, 1211933, 1227630, 1214595, 1218475, 1205711, 1219735, 1223289, 1213304, 1216414, 1224963, 1209234, 1226614	2125	52	6610	1.37584	1	0.688332	73.3057
GOTERM_MF_FAT	GO:0016881~acid-amino acid ligase activity	33	0.356757	0.083112	1216933, 1211438, 1227232, 1226203, 1213255, 1210672, 1209510, 1226882, 1221740, 1213680, 1206930, 1216974, 1222909, 1219055, 1221803, 1205212, 1220349, 1205190, 1210217, 1206347, 1216284, 1225006, 1210669, 1212459, 1214039, 1211938, 1216075, 1213304, 1226492, 1214558, 1219895, 1205562, 1213461	2125	80	6610	1.28312	1	0.704463	75.2851
GOTERM_MF_FAT	GO:0005217~intracellular ligand-gated ion channel activity	5	0.0540541	0.088612	1220785, 1209385, 1208249, 1224765, 1220002	2125	6	6610	2.59216	1	0.724169	77.5681
GOTERM_MF_FAT	GO:0005267~potassium channel activity	31	0.335135	0.0912242	1212320, 1227058, 1216633, 1217544, 1221765, 1220848, 1215309, 1218458, 1214407, 1219818, 1226884, 1208175, 1220096, 1215300, 1211700, 1205476, 1216334, 1211656, 1225463, 1213115, 1206830, 1217755, 1206843, 1206320, 1218468, 1220999, 1220753, 1222516, 1213651, 1208640, 1227481	2125	75	6610	1.28571	1	0.73077	78.5817
HOMOLOGOUS_GENE	1207728:similar to Cytosolic phospholipase A2 epsilon (cPLA2-epsilon) (Phospholipase A2 group IVE)	5	0.0540541	0.085339	1220976, 1217448, 1209472, 1225706, 1210375	4070	6	12809	2.62265	1	1	86.9303
HOMOLOGOUS_GENE	1210159:similar to Cytosolic phospholipase A2 epsilon (cPLA2-epsilon) (Phospholipase A2 group IVE)	5	0.0540541	0.085339	1220976, 1217448, 1209472, 1225706, 1210375	4070	6	12809	2.62265	1	1	86.9303
INTERPRO	IPR003961:Fibronectin, type III	48	0.518919	3.45144e-07	1211030, 1214409, 1223112, 1222080, 1209309, 1208328, 1214835, 1221503, 1216440, 1219141, 1208691, 1206954, 1206003, 1210805, 1210882, 1205912, 1212017, 1208343, 1224302, 1212826, 1227508, 1210331, 1224106, 1222098, 1214293, 1205075, 1209422, 1226522, 1224411, 1214326, 1218132, 1219734, 1227346, 1208414, 1213204, 1206771, 1207172, 1214305, 1225022, 1226024, 1227007, 1208478, 1214479, 1206820, 122…	1584	74	4557	1.86609	0.000787999	0.000787999	0.00060261
INTERPRO	IPR008957:Fibronectin, type III-like fold	48	0.518919	1.8477e-06	1211030, 1214409, 1223112, 1222080, 1209309, 1208328, 1214835, 1221503, 1216440, 1208691, 1206954, 1206003, 1223885, 1210805, 1210882, 1205912, 1208343, 1224302, 1212826, 1227508, 1224106, 1222098, 1214293, 1205075, 1209422, 1226522, 1224411, 1217477, 1214326, 1218132, 1219734, 1227346, 1208414, 1213204, 1206771, 1214305, 1218940, 1225022, 1226024, 1227007, 1208478, 1214479, 1206820, 1221399, 120…	1584	77	4557	1.79339	0.00421125	0.00210785	0.00322598
INTERPRO	IPR003598:Immunoglobulin subtype 2	32	0.345946	0.000322009	1205695, 1214409, 1223112, 1210849, 1218451, 1212195, 1219141, 1208691, 1206003, 1210882, 1225191, 1222472, 1208343, 1216478, 1227508, 1221161, 1216718, 1224106, 1222098, 1216262, 1211165, 1213723, 1225642, 1227346, 1218083, 1206771, 1214305, 1225022, 1205337, 1211521, 1207344, 1224857	1584	53	4557	1.73699	0.520776	0.217449	0.560731
INTERPRO	IPR008266:Tyrosine protein kinase, active site	31	0.335135	0.000349923	1206642, 1209309, 1210796, 1218451, 1214428, 1216440, 1212195, 1210805, 1211272, 1225957, 1219413, 1222472, 1224302, 1227524, 1205075, 1211165, 1225642, 1219734, 1225781, 1209087, 1208414, 1209816, 1218138, 1226024, 1220737, 1218900, 1214479, 1210929, 1224857, 1225189, 1211062	1584	51	4557	1.7487	0.550385	0.181139	0.609199
INTERPRO	IPR003962:Fibronectin, type III subdomain	15	0.162162	0.000602045	1214409, 1205075, 1209309, 1219734, 1208414, 1206771, 1208691, 1206003, 1210805, 1226024, 1208478, 1208343, 1225189, 1227508, 1211062	1584	19	4557	2.27123	0.747283	0.240502	1.04596
INTERPRO	IPR013032:EGF-like region, conserved site	48	0.518919	0.000604938	1211030, 1214011, 1209309, 1219598, 1213835, 1226779, 1226799, 1210805, 1217393, 1211535, 1226051, 1223073, 1215687, 1208858, 1224941, 1223130, 1208191, 1223327, 1224302, 1214015, 1205822, 1221161, 1214084, 1226342, 1216718, 1210331, 1205075, 1226522, 1219509, 1219734, 1223373, 1225134, 1211372, 1208414, 1214986, 1225215, 1216764, 1215825, 1221594, 1224313, 1227007, 1212318, 1220634, 1225414, 121…	1584	91	4557	1.51748	0.748948	0.205744	1.05096
INTERPRO	IPR001245:Tyrosine protein kinase	38	0.410811	0.000915616	1206642, 1215608, 1209309, 1210796, 1218451, 1214428, 1216440, 1212195, 1222595, 1210805, 1222627, 1211272, 1215440, 1225957, 1219413, 1222472, 1224302, 1227524, 1208074, 1205075, 1211165, 1225642, 1219734, 1225781, 1209087, 1208414, 1209816, 1218138, 1226024, 1220737, 1218900, 1214479, 1206800, 1210929, 1224857, 1212952, 1225189, 1211062	1584	69	4557	1.58438	0.876588	0.258359	1.58665
INTERPRO	IPR013098:Immunoglobulin I-set	27	0.291892	0.00124904	1214409, 1223112, 1210849, 1218451, 1212195, 1208691, 1206003, 1210882, 1225191, 1222472, 1208343, 1216478, 1227508, 1221161, 1216718, 1224106, 1222098, 1211165, 1225642, 1218083, 1227346, 1206771, 1218138, 1214305, 1225022, 1211521, 1224857	1584	45	4557	1.72614	0.942421	0.300104	2.15852
INTERPRO	IPR015943:WD40/YVTN repeat-like	46	0.497297	0.00139843	1205695, 1226198, 1218228, 1211724, 1210798, 1220054, 1214582, 1213295, 1219789, 1226455, 1214782, 1221416, 1220929, 1227479, 1219831, 1215758, 1209674, 1220145, 1219078, 1226772, 1220648, 1207577, 1223511, 1224943, 1213612, 1207916, 1208273, 1208290, 1215157, 1208647, 1212143, 1205567, 1222071, 1225781, 1227550, 1227364, 1216281, 1224970, 1208529, 1207067, 1209977, 1218050, 1225767, 1212931, 122…	1584	89	4557	1.48693	0.959085	0.298924	2.41372
INTERPRO	IPR017441:Protein kinase, ATP binding site	62	0.67027	0.00192297	1226848, 1205009, 1227404, 1217773, 1209309, 1218451, 1209254, 1216440, 1226591, 1212195, 1220256, 1210805, 1210576, 1209963, 1213258, 1220808, 1225957, 1222472, 1222444, 1217936, 1212066, 1225642, 1225781, 1209087, 1218138, 1220737, 1218900, 1225475, 1214479, 1225189, 1224857, 1206642, 1217956, 1210796, 1226302, 1214428, 1224981, 1210753, 1222627, 1211272, 1221017, 1218725, 1215440, 1205701, 120…	1584	129	4557	1.38269	0.987677	0.355725	3.30484
INTERPRO	IPR008160:Collagen triple helix repeat	18	0.194595	0.00432006	1208093, 1222002, 1211915, 1212119, 1209422, 1224411, 1222133, 1218132, 1220547, 1222655, 1213629, 1216861, 1225348, 1205336, 1205912, 1223951, 1224394, 1216489	1584	28	4557	1.84943	0.999949	0.593001	7.28041
INTERPRO	IPR001426:Receptor tyrosine kinase, class V, conserved site	9	0.0972973	0.00453057	1226024, 1205075, 1209309, 1219734, 1224302, 1208414, 1225189, 1211062, 1210805	1584	10	4557	2.5892	0.999969	0.578644	7.62208
INTERPRO	IPR001090:Ephrin receptor, ligand binding	9	0.0972973	0.00453057	1226024, 1205075, 1209309, 1219734, 1224302, 1208414, 1225189, 1211062, 1210805	1584	10	4557	2.5892	0.999969	0.578644	7.62208
INTERPRO	IPR001609:Myosin head, motor region	10	0.108108	0.00524285	1223331, 1210315, 1218131, 1219307, 1222750, 1227295, 1215625, 1206180, 1227490, 1210524	1584	12	4557	2.39741	0.999994	0.602894	8.76937
INTERPRO	IPR019782:WD40 repeat 2	36	0.389189	0.00765602	1218228, 1210798, 1220054, 1214582, 1219789, 1214782, 1221416, 1220929, 1227479, 1219831, 1220145, 1219078, 1226772, 1223511, 1224943, 1213612, 1207916, 1208273, 1208290, 1215157, 1208647, 1212143, 1205567, 1222071, 1227364, 1216281, 1227550, 1224970, 1208529, 1207067, 1209977, 1218050, 1225767, 1212931, 1220060, 1205562	1584	71	4557	1.45871	1	0.714591	12.5573
INTERPRO	IPR006210:EGF-like	30	0.324324	0.00849214	1214011, 1223822, 1219598, 1226799, 1217393, 1211535, 1223073, 1208858, 1215687, 1224941, 1208191, 1223130, 1223327, 1205822, 1214015, 1221161, 1220103, 1214084, 1216718, 1226342, 1223373, 1214986, 1225215, 1216764, 1215825, 1224313, 1227007, 1210161, 1226702, 1212877	1584	57	4557	1.51415	1	0.727084	13.8348
INTERPRO	IPR000719:Protein kinase, core	76	0.821622	0.00870805	1226848, 1227404, 1205009, 1209309, 1217773, 1218451, 1209254, 1216440, 1226591, 1212195, 1220256, 1210805, 1210576, 1209963, 1213258, 1220808, 1225957, 1222472, 1222444, 1217936, 1222447, 1215244, 1212066, 1225642, 1225781, 1209087, 1218138, 1223629, 1220737, 1218900, 1225475, 1214479, 1225189, 1224857, 1210929, 1213444, 1215608, 1206642, 1217956, 1210796, 1226302, 1214428, 1210695, 1222595, 121…	1584	172	4557	1.27119	1	0.71307	14.1618
INTERPRO	IPR019775:WD40 repeat, conserved site	36	0.389189	0.0100225	1218228, 1211724, 1210798, 1214582, 1219789, 1213625, 1214782, 1221416, 1220929, 1227479, 1219831, 1220145, 1219078, 1226772, 1225799, 1207577, 1224943, 1213612, 1207916, 1208290, 1215157, 1208647, 1212143, 1205567, 1222071, 1227364, 1227550, 1224970, 1207067, 1209977, 1218050, 1225767, 1212931, 1218368, 1220060, 1205562	1584	72	4557	1.43845	1	0.741626	16.1275
INTERPRO	IPR017986:WD40 repeat, region	36	0.389189	0.0100225	1218228, 1210798, 1220054, 1214582, 1219789, 1214782, 1221416, 1220929, 1227479, 1219831, 1220145, 1219078, 1226772, 1223511, 1224943, 1213612, 1207916, 1208273, 1208290, 1215157, 1208647, 1212143, 1205567, 1222071, 1227364, 1216281, 1227550, 1224970, 1208529, 1207067, 1209977, 1218050, 1225767, 1212931, 1220060, 1205562	1584	72	4557	1.43845	1	0.741626	16.1275
INTERPRO	IPR016257:Tyrosine-protein kinase, ephrin receptor	8	0.0864865	0.0106117	1226024, 1205075, 1209309, 1224302, 1208414, 1225189, 1211062, 1210805	1584	9	4557	2.55724	1	0.741718	16.9949
INTERPRO	IPR013151:Immunoglobulin	25	0.27027	0.0109238	1226198, 1205695, 1214409, 1210849, 1218336, 1226863, 1219141, 1206003, 1225191, 1222472, 1208343, 1216478, 1227508, 1216718, 1224106, 1207509, 1222098, 1216262, 1211165, 1213723, 1225642, 1206771, 1225022, 1205337, 1219637	1584	46	4557	1.56353	1	0.732967	17.4508
INTERPRO	IPR006209:EGF	23	0.248649	0.0137405	1214011, 1223822, 1219598, 1223373, 1214986, 1226799, 1225215, 1211535, 1216764, 1215825, 1223073, 1227007, 1208858, 1215687, 1224941, 1208191, 1210161, 1205822, 1214015, 1214084, 1220103, 1212877, 1216718	1584	42	4557	1.57544	1	0.794035	21.4606
INTERPRO	IPR001849:Pleckstrin homology	23	0.248649	0.0137405	1205108, 1225446, 1209281, 1227025, 1224403, 1216800, 1211779, 1225146, 1227640, 1212187, 1209498, 1215464, 1215744, 1212385, 1223077, 1223429, 1215705, 1224687, 1216360, 1219413, 1222130, 1225371, 1215411	1584	42	4557	1.57544	1	0.794035	21.4606
INTERPRO	IPR019781:WD40 repeat, subgroup	36	0.389189	0.0165574	1218228, 1210798, 1220054, 1214582, 1219789, 1214782, 1221416, 1220929, 1227479, 1219831, 1220145, 1219078, 1226772, 1223511, 1224943, 1213612, 1207916, 1208273, 1208290, 1215157, 1208647, 1212143, 1205567, 1222071, 1227364, 1216281, 1227550, 1224970, 1208529, 1207067, 1209977, 1218050, 1225767, 1212931, 1220060, 1205562	1584	74	4557	1.39957	1	0.837308	25.2864
INTERPRO	IPR001715:Calponin-like actin-binding	14	0.151351	0.0165865	1220198, 1221896, 1219128, 1209281, 1221958, 1224403, 1216348, 1211281, 1215464, 1211533, 1218382, 1212017, 1227434, 1224048	1584	22	4557	1.83075	1	0.823851	25.325
INTERPRO	IPR001680:WD40 repeat	38	0.410811	0.0167514	1218228, 1211724, 1210798, 1220054, 1214582, 1219789, 1214782, 1221416, 1220929, 1227479, 1219831, 1209674, 1220145, 1219078, 1226772, 1223511, 1224943, 1213612, 1207916, 1208273, 1208290, 1215157, 1208647, 1212143, 1205567, 1222071, 1227550, 1227364, 1216281, 1224970, 1208529, 1207067, 1209977, 1218050, 1225767, 1212931, 1220060, 1205562	1584	79	4557	1.38382	1	0.813174	25.5433
INTERPRO	IPR000152:EGF-type aspartate/asparagine hydroxylation conserved site	18	0.194595	0.0168541	1214011, 1223822, 1219598, 1223373, 1214986, 1226799, 1217393, 1211535, 1216764, 1215825, 1223073, 1208858, 1215687, 1225414, 1205822, 1214015, 1214084, 1212877	1584	31	4557	1.67045	1	0.80163	25.679
INTERPRO	IPR004009:Myosin, N-terminal, SH3-like	6	0.0648649	0.0214936	1219307, 1227295, 1215625, 1206180, 1227490, 1210524	1584	6	4557	2.87689	1	0.862628	31.5703
INTERPRO	IPR000885:Fibrillar collagen, C-terminal	6	0.0648649	0.0214936	1208093, 1222002, 1211915, 1205336, 1216489, 1220547	1584	6	4557	2.87689	1	0.862628	31.5703
INTERPRO	IPR000233:Cadherin cytoplasmic region	10	0.108108	0.0229604	1221722, 1224505, 1225099, 1209477, 1212069, 1205469, 1218764, 1225072, 1226799, 1205128	1584	14	4557	2.05492	1	0.870036	33.3394
INTERPRO	IPR001452:Src homology-3 domain	26	0.281081	0.0242136	1227254, 1206642, 1219787, 1227609, 1224403, 1205472, 1215464, 1226796, 1217193, 1225796, 1206438, 1219413, 1223328, 1223131, 1223331, 1205039, 1209281, 1226358, 1209087, 1217607, 1209816, 1214639, 1215744, 1216360, 1214690, 1222513	1584	51	4557	1.46665	1	0.874255	34.8166
INTERPRO	IPR001791:Laminin G	8	0.0864865	0.0248011	1211535, 1214011, 1215825, 1215687, 1216489, 1208191, 1226799, 1216718	1584	10	4557	2.30152	1	0.871081	35.4984
INTERPRO	IPR001202:WW/Rsp5/WWP	8	0.0864865	0.0248011	1213607, 1211533, 1215226, 1226203, 1219361, 1225722, 1214558, 1214039	1584	10	4557	2.30152	1	0.871081	35.4984
INTERPRO	IPR018359:Bromodomain, conserved site	8	0.0864865	0.0248011	1226285, 1220520, 1206766, 1214556, 1207605, 1214713, 1218404, 1213408	1584	10	4557	2.30152	1	0.871081	35.4984
INTERPRO	IPR000421:Coagulation factor 5/8 type, C-terminal	8	0.0864865	0.0248011	1206916, 1222489, 1225621, 1208191, 1226779, 1210929, 1213988, 1225977	1584	10	4557	2.30152	1	0.871081	35.4984
INTERPRO	IPR018097:EGF-like calcium-binding, conserved site	17	0.183784	0.0276044	1223822, 1219598, 1223373, 1214986, 1217393, 1225215, 1216764, 1215825, 1223073, 1208858, 1215687, 1225414, 1205822, 1214015, 1214084, 1221811, 1212877	1584	30	4557	1.63024	1	0.889711	38.6602
INTERPRO	IPR011993:Pleckstrin homology-type	26	0.281081	0.0316196	1205108, 1225446, 1225369, 1211316, 1227257, 1224403, 1205222, 1227640, 1225146, 1215464, 1212385, 1223077, 1223429, 1219413, 1221546, 1216800, 1211779, 1212187, 1209498, 1215744, 1215705, 1224687, 1216360, 1222130, 1225371, 1215411	1584	52	4557	1.43845	1	0.913377	42.9354
INTERPRO	IPR000008:C2 calcium-dependent membrane targeting	12	0.12973	0.03253	1218725, 1207896, 1226203, 1211779, 1213331, 1225146, 1214558, 1219207, 1214039, 1214150, 1206795, 1225667	1584	19	4557	1.81699	1	0.91254	43.8648
INTERPRO	IPR013761:Sterile alpha motif-type	15	0.162162	0.0349678	1218875, 1205075, 1209309, 1207211, 1216593, 1208414, 1227000, 1210805, 1226091, 1226024, 1221663, 1224302, 1225189, 1205562, 1211062	1584	26	4557	1.65975	1	0.921174	46.284
INTERPRO	IPR002035:von Willebrand factor, type A	11	0.118919	0.0361213	1209422, 1209719, 1224411, 1212318, 1205912, 1222417, 1220634, 1218132, 1223019, 1224941, 1216861	1584	17	4557	1.86152	1	0.921629	47.394
INTERPRO	IPR001660:Sterile alpha motif SAM	14	0.151351	0.0393902	1205075, 1209309, 1216593, 1218744, 1208414, 1210805, 1226091, 1209966, 1226024, 1221663, 1224302, 1225189, 1205562, 1211062	1584	24	4557	1.67819	1	0.932769	50.4235
INTERPRO	IPR000048:IQ calmodulin-binding region	10	0.108108	0.0399693	1223331, 1210315, 1218131, 1219307, 1222750, 1227295, 1215625, 1206180, 1227490, 1210524	1584	15	4557	1.91793	1	0.93018	50.9427
INTERPRO	IPR018029:C2 membrane targeting protein	9	0.0972973	0.0439866	1218725, 1211779, 1213331, 1225146, 1214558, 1219207, 1214039, 1214150, 1206795	1584	13	4557	1.9917	1	0.942383	54.4061
INTERPRO	IPR011989:Armadillo-like helical	16	0.172973	0.0441576	1225518, 1208720, 1206857, 1205543, 1218943, 1221302, 1222910, 1224919, 1212968, 1226031, 1221583, 1216527, 1205624, 1216897, 1210483, 1213444	1584	29	4557	1.58725	1	0.938447	54.5483
INTERPRO	IPR000742:EGF-like, type 3	27	0.291892	0.0458185	1214011, 1219598, 1226799, 1217393, 1211535, 1223073, 1208858, 1215687, 1208191, 1223327, 1205822, 1214015, 1214084, 1221161, 1216718, 1226342, 1223373, 1214986, 1216764, 1225215, 1221594, 1215825, 1224313, 1227007, 1225414, 1210161, 1212877	1584	56	4557	1.38707	1	0.940335	55.9077
INTERPRO	IPR000014:PAS	8	0.0864865	0.0479793	1225942, 1216589, 1225068, 1226263, 1213574, 1212557, 1212364, 1217289	1584	11	4557	2.09229	1	0.943838	57.6189
INTERPRO	IPR003659:Plexin/semaphorin/integrin	8	0.0864865	0.0479793	1226198, 1205695, 1213295, 1212318, 1226455, 1220634, 1225781, 1227524	1584	11	4557	2.09229	1	0.943838	57.6189
INTERPRO	IPR001487:Bromodomain	8	0.0864865	0.0479793	1226285, 1220520, 1206766, 1214556, 1207605, 1214713, 1218404, 1213408	1584	11	4557	2.09229	1	0.943838	57.6189
INTERPRO	IPR013655:PAS fold-3	7	0.0756757	0.0515332	1225942, 1216589, 1225068, 1226263, 1213574, 1212557, 1217289	1584	9	4557	2.23758	1	0.951251	60.298
INTERPRO	IPR001627:Semaphorin/CD100 antigen	7	0.0756757	0.0515332	1226198, 1205695, 1213295, 1220648, 1226455, 1225781, 1227524	1584	9	4557	2.23758	1	0.951251	60.298
INTERPRO	IPR012680:Laminin G, subdomain 2	7	0.0756757	0.0515332	1211535, 1215825, 1215687, 1216489, 1208191, 1226799, 1216718	1584	9	4557	2.23758	1	0.951251	60.298
INTERPRO	IPR014721:Ribosomal protein S5 domain 2-type fold	5	0.0540541	0.0524776	1226707, 1221819, 1225045, 1224060, 1207216	1584	5	4557	2.87689	1	0.950356	60.9826
INTERPRO	IPR003395:RecF/RecN/SMC protein, N-terminal	5	0.0540541	0.0524776	1218403, 1219081, 1210828, 1222202, 1216573	1584	5	4557	2.87689	1	0.950356	60.9826
INTERPRO	IPR001828:Extracellular ligand-binding receptor	6	0.0648649	0.0537439	1205349, 1214997, 1222732, 1215698, 1216214, 1215953	1584	7	4557	2.46591	1	0.950417	61.883
INTERPRO	IPR002464:DNA/RNA helicase, ATP-dependent, DEAH-box type, conserved site	6	0.0648649	0.0537439	1223958, 1221450, 1207703, 1217768, 1207964, 1218785	1584	7	4557	2.46591	1	0.950417	61.883
INTERPRO	IPR002165:Plexin	6	0.0648649	0.0537439	1226198, 1205695, 1213295, 1220648, 1225781, 1227524	1584	7	4557	2.46591	1	0.950417	61.883
INTERPRO	IPR014001:DEAD-like helicase, N-terminal	17	0.183784	0.0714695	1219445, 1207703, 1212089, 1224102, 1210207, 1220293, 1207964, 1205243, 1227446, 1223958, 1225924, 1221450, 1217768, 1219975, 1213485, 1207605, 1214713	1584	33	4557	1.48204	1	0.980526	72.6013
INTERPRO	IPR017871:ABC transporter, conserved site	9	0.0972973	0.0720215	1218403, 1212309, 1213316, 1211223, 1218997, 1218444, 1222202, 1219616, 1219837	1584	14	4557	1.84943	1	0.97935	72.8843
INTERPRO	IPR000832:GPCR, family 2, secretin-like	8	0.0864865	0.0812935	1207301, 1221921, 1221438, 1215905, 1205889, 1220791, 1226351, 1218201	1584	12	4557	1.91793	1	0.986479	77.245
INTERPRO	IPR006670:Cyclin	8	0.0864865	0.0812935	1221394, 1223526, 1220508, 1208958, 1207630, 1216451, 1218820, 1220604	1584	12	4557	1.91793	1	0.986479	77.245
INTERPRO	IPR017983:GPCR, family 2, secretin-like, conserved site	8	0.0864865	0.0812935	1207301, 1221921, 1221438, 1215905, 1205889, 1220791, 1226351, 1218201	1584	12	4557	1.91793	1	0.986479	77.245
INTERPRO	IPR001878:Zinc finger, CCHC-type	8	0.0864865	0.0812935	1226460, 1219164, 1219159, 1224891, 1226441, 1222718, 1227195, 1206237	1584	12	4557	1.91793	1	0.986479	77.245
INTERPRO	IPR001005:SANT, DNA-binding	8	0.0864865	0.0812935	1219438, 1207703, 1215550, 1224364, 1208295, 1222636, 1214638, 1207136	1584	12	4557	1.91793	1	0.986479	77.245
INTERPRO	IPR003599:Immunoglobulin subtype	39	0.421622	0.0829108	1226198, 1213295, 1210849, 1208328, 1218336, 1226863, 1219141, 1212195, 1208691, 1206003, 1210882, 1225191, 1225799, 1222472, 1208343, 1216478, 1212826, 1214084, 1227508, 1224106, 1217578, 1222098, 1207509, 1216262, 1214704, 1211165, 1213723, 1214326, 1227346, 1223373, 1206771, 1223229, 1218138, 1214305, 1225022, 1209608, 1205337, 1219637, 1226568	1584	90	4557	1.24665	1	0.986396	77.9344
INTERPRO	IPR001879:GPCR, family 2, extracellular region	7	0.0756757	0.0916314	1207301, 1221921, 1221438, 1205889, 1220791, 1226351, 1218201	1584	10	4557	2.01383	1	0.99063	81.3247
INTERPRO	IPR001610:PAC motif	7	0.0756757	0.0916314	1225942, 1216589, 1225068, 1226263, 1213574, 1212557, 1217289	1584	10	4557	2.01383	1	0.99063	81.3247
INTERPRO	IPR001589:Actinin-type, actin-binding, conserved site	7	0.0756757	0.0916314	1220198, 1221896, 1211533, 1218382, 1221958, 1212017, 1211281	1584	10	4557	2.01383	1	0.99063	81.3247
INTERPRO	IPR014021:Helicase, superfamily 1 and 2, ATP-binding	17	0.183784	0.0928871	1219445, 1207703, 1212089, 1224102, 1210207, 1220293, 1207964, 1205243, 1227446, 1223958, 1225924, 1221450, 1217768, 1219975, 1213485, 1207605, 1214713	1584	34	4557	1.43845	1	0.990331	81.7703
INTERPRO	IPR011042:Six-bladed beta-propeller, TolB-like	10	0.108108	0.0949092	1210331, 1211551, 1215163, 1213535, 1214479, 1210161, 1214986, 1220103, 1212877, 1226342	1584	17	4557	1.69229	1	0.990421	82.467
INTERPRO	IPR001007:von Willebrand factor, type C	10	0.108108	0.0949092	1224236, 1208093, 1222002, 1210371, 1220300, 1208858, 1224341, 1220547, 1226779, 1219824	1584	17	4557	1.69229	1	0.990421	82.467
KEGG_PATHWAY	gga04510:Focal adhesion	78	0.843243	2.27056e-05	1216993, 1220198, 1216818, 1207592, 1211316, 1214950, 1208403, 1217539, 1220811, 1227011, 1220256, 1215464, 1225982, 1211093, 1225957, 1212017, 1208381, 1222472, 1212247, 1205988, 1208093, 1213442, 1216927, 1222487, 1217764, 1208958, 1205631, 1218132, 1225781, 1215674, 1211281, 1209087, 1219792, 1216861, 1210504, 1224299, 1223959, 1222988, 1227007, 1224394, 1224910, 1221399, 1227311, 1220117, 120…	1002	163	3126	1.49289	0.00319641	0.00319641	0.0268205
KEGG_PATHWAY	gga04520:Adherens junction	34	0.367568	0.000567965	1206642, 1221053, 1205066, 1216994, 1210650, 1214835, 1225963, 1218764, 1216440, 1213999, 1219845, 1210753, 1225957, 1224440, 1221233, 1227302, 1221367, 1225423, 1226614, 1213442, 1213655, 1217623, 1225642, 1218809, 1225781, 1209087, 1226168, 1209816, 1210504, 1226604, 1227185, 1218382, 1223870, 1210020	1002	63	3126	1.68368	0.0769814	0.0392614	0.668922
KEGG_PATHWAY	gga02010:ABC transporters	19	0.205405	0.00235432	1216082, 1222782, 1222838, 1219979, 1223567, 1207598, 1213739, 1224906, 1219837, 1210588, 1210691, 1212309, 1213316, 1227657, 1227358, 1224950, 1220779, 1218997, 1219616	1002	31	3126	1.91211	0.282764	0.104867	2.74619
KEGG_PATHWAY	gga04070:Phosphatidylinositol signaling system	31	0.335135	0.00261794	1226825, 1222008, 1214185, 1208403, 1219574, 1221585, 1218725, 1206767, 1205761, 1220002, 1207252, 1224262, 1212247, 1214021, 1215153, 1216983, 1216102, 1213037, 1219207, 1220822, 1206731, 1208811, 1214815, 1221753, 1223065, 1207346, 1215868, 1205831, 1221735, 1220117, 1208285	1002	60	3126	1.61188	0.308999	0.0882628	3.04936
KEGG_PATHWAY	gga04512:ECM-receptor interaction	34	0.367568	0.00304362	1211030, 1214011, 1222002, 1222148, 1207592, 1224191, 1223296, 1214950, 1220811, 1227011, 1226105, 1216718, 1208093, 1211915, 1222487, 1215359, 1212180, 1205631, 1223554, 1215674, 1218132, 1219792, 1216861, 1206669, 1218307, 1224299, 1206736, 1205336, 1227007, 1212318, 1222417, 1216489, 1224394, 1221399	1002	68	3126	1.55988	0.349364	0.0823698	3.53706
KEGG_PATHWAY	gga00562:Inositol phosphate metabolism	22	0.237838	0.0207013	1214021, 1215153, 1226825, 1222008, 1216102, 1208403, 1213037, 1220822, 1219574, 1206731, 1220184, 1221585, 1208811, 1214815, 1221753, 1223065, 1207346, 1215868, 1205761, 1221735, 1207252, 1212247	1002	44	3126	1.55988	0.947635	0.388345	21.8958
KEGG_PATHWAY	gga04530:Tight junction	42	0.454054	0.0341892	1205066, 1216994, 1217773, 1207437, 1227295, 1215625, 1213999, 1209558, 1220177, 1210753, 1206180, 1212822, 1226796, 1218725, 1205860, 1208381, 1219336, 1209226, 1212247, 1227490, 1215226, 1215690, 1216262, 1213655, 1213636, 1217626, 1211000, 1207461, 1218809, 1217808, 1209087, 1219207, 1209816, 1220115, 1209681, 1224094, 1218382, 1223870, 1219307, 1206349, 1210524, 1226662	1002	100	3126	1.3103	0.992591	0.50377	33.6992
KEGG_PATHWAY	gga04310:Wnt signaling pathway	49	0.52973	0.03679	1227684, 1208300, 1220686, 1212771, 1226947, 1226716, 1222444, 1225423, 1226614, 1209318, 1208958, 1219827, 1226421, 1224457, 1221302, 1210504, 1208780, 1227659, 1219260, 1218842, 1227517, 1221053, 1209450, 1217956, 1205544, 1225963, 1222691, 1210753, 1218725, 1226772, 1205701, 1224440, 1208325, 1205502, 1220103, 1205571, 1222795, 1215153, 1222962, 1207461, 1213037, 1219207, 1206462, 1224166, 122…	1002	120	3126	1.2739	0.994934	0.483486	35.778
KEGG_PATHWAY	gga04916:Melanogenesis	34	0.367568	0.0494253	1225420, 1208300, 1221053, 1209450, 1217956, 1225963, 1212195, 1226947, 1209558, 1214337, 1220256, 1217153, 1218725, 1205701, 1211530, 1208381, 1226716, 1226614, 1222795, 1218159, 1215153, 1209318, 1219827, 1213037, 1219207, 1224457, 1208780, 1227659, 1220115, 1223601, 1224317, 1216414, 1221220, 1227517	1002	80	3126	1.3259	0.999213	0.548022	45.0541
KEGG_PATHWAY	gga00450:Selenoamino acid metabolism	11	0.118919	0.0496075	1206576, 1211836, 1216859, 1209502, 1227292, 1215384, 1212363, 1223760, 1223324, 1215621, 1225049	1002	19	3126	1.80618	0.999234	0.511986	45.1784
KEGG_PATHWAY	gga00310:Lysine degradation	16	0.172973	0.0555946	1222829, 1216251, 1205830, 1217626, 1216267, 1205670, 1207334, 1216221, 1209621, 1211451, 1214241, 1226036, 1214004, 1222160, 1217021, 1220196	1002	32	3126	1.55988	0.999686	0.519629	49.1221
KEGG_PATHWAY	gga04370:VEGF signaling pathway	25	0.27027	0.0685415	1226848, 1208403, 1214185, 1214428, 1222691, 1220256, 1218725, 1208381, 1205502, 1218237, 1220976, 1211165, 1222962, 1209087, 1219207, 1226421, 1214150, 1210504, 1214759, 1223870, 1221753, 1219040, 1223335, 1208285, 1220117	1002	57	3126	1.36832	0.999955	0.565819	56.7779
KEGG_PATHWAY	gga04330:Notch signaling pathway	19	0.205405	0.0728349	1221053, 1208300, 1220520, 1222170, 1213625, 1205222, 1225963, 1206166, 1224469, 1221445, 1217589, 1205097, 1224500, 1212909, 1212028, 1206766, 1208858, 1205822, 1221531	1002	41	3126	1.44574	0.999977	0.559668	59.0737
KEGG_PATHWAY	gga04650:Natural killer cell mediated cytotoxicity	27	0.291892	0.0751053	1216993, 1205108, 1206642, 1224403, 1208403, 1214185, 1222691, 1220256, 1223885, 1209966, 1215464, 1225982, 1218725, 1226795, 1208381, 1205502, 1221636, 1222962, 1219207, 1226421, 1210504, 1221753, 1220634, 1224910, 1211641, 1208285, 1220117	1002	63	3126	1.33704	0.999983	0.544487	60.2421
KEGG_PATHWAY	gga04340:Hedgehog signaling pathway	19	0.205405	0.0907126	1222795, 1209450, 1208082, 1210865, 1207899, 1219827, 1224457, 1216155, 1227659, 1218645, 1226772, 1222212, 1223601, 1219909, 1214458, 1216887, 1221220, 1222444, 1227517	1002	42	3126	1.41132	0.999998	0.590936	67.4833
PIR_SUPERFAMILY	PIRSF000666:TyrPK_ephrin_receptor	8	0.0864865	0.00887373	1226024, 1205075, 1209309, 1224302, 1208414, 1225189, 1211062, 1210805	723	9	2137	2.62732	0.998907	0.998907	12.7171
PIR_SUPERFAMILY	PIRSF002504:cadherin	9	0.0972973	0.0370919	1221722, 1224505, 1225099, 1209477, 1210889, 1205469, 1218764, 1225072, 1205128	723	13	2137	2.04628	1	0.999999	43.8296
PUBMED_ID	15642098	821	8.87568	5.49079e-06	1226848, 1225595, 1207147, 1227685, 1220054, 1226171, 1214782, 1220848, 1208825, 1225053, 1221119, 1218490, 1214376, 1218492, 1211150, 1205190, 1207803, 1225580, 1208958, 1208817, 1220839, 1215384, 1214770, 1227690, 1207547, 1206962, 1214779, 1225045, 1221713, 1206014, 1220060, 1224055, 1226195, 1225575, 1205165, 1206044, 1213234, 1218475, 1207577, 1205574, 1227666, 1220664, 1205572, 1214901, 122…	1650	2174	4795	1.09746	0.0102425	0.0102425	0.00936887
PUBMED_ID	15496914	22	0.237838	0.0349026	1221394, 1226973, 1223869, 1224236, 1208696, 1217801, 1206502, 1211213, 1218505, 1215998, 1213739, 1223579, 1227199, 1209510, 1215475, 1207929, 1227358, 1205800, 1205861, 1213766, 1222349, 1213461	1650	43	4795	1.48682	1	1	45.4584
SMART	SM00060:FN3	48	0.518919	6.19283e-06	1211030, 1214409, 1223112, 1222080, 1209309, 1208328, 1214835, 1221503, 1216440, 1219141, 1208691, 1206954, 1206003, 1210805, 1210882, 1205912, 1212017, 1208343, 1224302, 1212826, 1227508, 1210331, 1224106, 1222098, 1214293, 1205075, 1209422, 1226522, 1224411, 1214326, 1218132, 1219734, 1227346, 1208414, 1213204, 1206771, 1207172, 1214305, 1225022, 1226024, 1227007, 1208478, 1214479, 1206820, 122…	956	74	2507	1.70101	0.00230109	0.00230109	0.0085462
SMART	SM00408:IGc2	32	0.345946	0.00186414	1205695, 1214409, 1223112, 1210849, 1218451, 1212195, 1219141, 1208691, 1206003, 1210882, 1225191, 1222472, 1208343, 1216478, 1227508, 1221161, 1216718, 1224106, 1222098, 1216262, 1211165, 1213723, 1225642, 1227346, 1218083, 1206771, 1214305, 1225022, 1205337, 1211521, 1207344, 1224857	956	53	2507	1.58333	0.50048	0.293233	2.54218
SMART	SM00219:TyrKc	38	0.410811	0.00565234	1206642, 1215608, 1209309, 1210796, 1218451, 1214428, 1216440, 1212195, 1222595, 1210805, 1222627, 1211272, 1215440, 1225957, 1219413, 1222472, 1224302, 1227524, 1208074, 1205075, 1211165, 1225642, 1219734, 1225781, 1209087, 1208414, 1209816, 1218138, 1226024, 1220737, 1218900, 1214479, 1206800, 1210929, 1224857, 1212952, 1225189, 1211062	956	69	2507	1.44421	0.878596	0.504842	7.52459
SMART	SM00615:EPH_lbd	9	0.0972973	0.00864264	1226024, 1205075, 1209309, 1219734, 1224302, 1208414, 1225189, 1211062, 1210805	956	10	2507	2.36015	0.960404	0.553921	11.2896
SMART	SM00242:MYSc	10	0.108108	0.0104771	1223331, 1210315, 1218131, 1219307, 1222750, 1227295, 1215625, 1206180, 1227490, 1210524	956	12	2507	2.18532	0.98012	0.543245	13.5284
SMART	SM00181:EGF	30	0.324324	0.0318923	1214011, 1223822, 1219598, 1226799, 1217393, 1211535, 1223073, 1208858, 1215687, 1224941, 1208191, 1223130, 1223327, 1205822, 1214015, 1221161, 1220103, 1214084, 1216718, 1226342, 1223373, 1214986, 1225215, 1216764, 1215825, 1224313, 1227007, 1210161, 1226702, 1212877	956	57	2507	1.3802	0.999994	0.86595	36.0653
SMART	SM00038:COLFI	6	0.0648649	0.0326865	1208093, 1222002, 1211915, 1205336, 1216489, 1220547	956	6	2507	2.62238	0.999996	0.828998	36.7853
SMART	SM00033:CH	14	0.151351	0.0364363	1220198, 1221896, 1219128, 1209281, 1221958, 1224403, 1216348, 1211281, 1215464, 1211533, 1218382, 1212017, 1227434, 1224048	956	22	2507	1.66879	0.999999	0.821991	40.0845
SMART	SM00233:PH	23	0.248649	0.0405144	1205108, 1225446, 1209281, 1227025, 1224403, 1216800, 1211779, 1225146, 1227640, 1212187, 1209498, 1215464, 1215744, 1212385, 1223077, 1223429, 1215705, 1224687, 1216360, 1219413, 1222130, 1225371, 1215411	956	42	2507	1.43607	1	0.819037	43.4909
SMART	SM00231:FA58C	8	0.0864865	0.0415832	1206916, 1222489, 1225621, 1208191, 1226779, 1210929, 1213988, 1225977	956	10	2507	2.09791	1	0.79402	44.3534
SMART	SM00456:WW	8	0.0864865	0.0415832	1213607, 1211533, 1215226, 1226203, 1219361, 1225722, 1214558, 1214039	956	10	2507	2.09791	1	0.79402	44.3534
SMART	SM00282:LamG	8	0.0864865	0.0415832	1211535, 1214011, 1215825, 1215687, 1216489, 1208191, 1226799, 1216718	956	10	2507	2.09791	1	0.79402	44.3534
SMART	SM00239:C2	12	0.12973	0.0628405	1218725, 1207896, 1226203, 1211779, 1213331, 1225146, 1214558, 1219207, 1214039, 1214150, 1206795, 1225667	956	19	2507	1.65624	1	0.888626	59.1674
SMART	SM00327:VWA	11	0.118919	0.0667582	1209422, 1209719, 1224411, 1212318, 1205912, 1222417, 1220634, 1218132, 1223019, 1224941, 1216861	956	17	2507	1.69684	1	0.882559	61.4611
SMART	SM00320:WD40	38	0.410811	0.0668998	1218228, 1211724, 1210798, 1220054, 1214582, 1219789, 1214782, 1221416, 1220929, 1227479, 1219831, 1209674, 1220145, 1219078, 1226772, 1223511, 1224943, 1213612, 1207916, 1208273, 1208290, 1215157, 1208647, 1212143, 1205567, 1222071, 1227550, 1227364, 1216281, 1224970, 1208529, 1207067, 1209977, 1218050, 1225767, 1212931, 1220060, 1205562	956	79	2507	1.2614	1	0.862125	61.5417
SMART	SM00015:IQ	10	0.108108	0.0706324	1223331, 1210315, 1218131, 1219307, 1222750, 1227295, 1215625, 1206180, 1227490, 1210524	956	15	2507	1.74826	1	0.85721	63.6114
SMART	SM00326:SH3	26	0.281081	0.0710732	1227254, 1206642, 1219787, 1227609, 1224403, 1205472, 1215464, 1226796, 1217193, 1225796, 1206438, 1219413, 1223328, 1223131, 1223331, 1205039, 1209281, 1226358, 1209087, 1217607, 1209816, 1214639, 1215744, 1216360, 1214690, 1222513	956	51	2507	1.3369	1	0.839328	63.8488
SMART	SM00423:PSI	8	0.0864865	0.0773435	1226198, 1205695, 1213295, 1212318, 1226455, 1220634, 1225781, 1227524	956	11	2507	1.90719	1	0.84612	67.0748
SMART	SM00297:BROMO	8	0.0864865	0.0773435	1226285, 1220520, 1206766, 1214556, 1207605, 1214713, 1218404, 1213408	956	11	2507	1.90719	1	0.84612	67.0748
SMART	SM00091:PAS	8	0.0864865	0.0773435	1225942, 1216589, 1225068, 1226263, 1213574, 1212557, 1212364, 1217289	956	11	2507	1.90719	1	0.84612	67.0748
SMART	SM00630:Sema	7	0.0756757	0.07922	1226198, 1205695, 1213295, 1220648, 1226455, 1225781, 1227524	956	9	2507	2.03963	1	0.835697	67.987
SMART	SM00454:SAM	14	0.151351	0.0797015	1205075, 1209309, 1216593, 1218744, 1208414, 1210805, 1226091, 1209966, 1226024, 1221663, 1224302, 1225189, 1205562, 1211062	956	24	2507	1.52972	1	0.820309	68.2172
SP_PIR_KEYWORDS	cell adhesion	46	0.497297	5.33271e-06	1225420, 1211030, 1211844, 1210849, 1218336, 1209477, 1214950, 1218764, 1226779, 1227011, 1206741, 1226799, 1206003, 1205128, 1211535, 1221722, 1210882, 1209717, 1225191, 1225099, 1210889, 1208191, 1227508, 1225072, 1224106, 1213442, 1222098, 1209422, 1213655, 1216694, 1224411, 1214326, 1218132, 1205469, 1213204, 1206771, 1216861, 1214305, 1225022, 1224299, 1227007, 1224505, 1212318, 1222417, 121…	1167	75	3361	1.76642	0.00241281	0.00241281	0.00757242
SP_PIR_KEYWORDS	nucleotide-binding	183	1.97838	2.70509e-05	1226848, 1225595, 1227404, 1209309, 1227113, 1209254, 1225793, 1215625, 1212195, 1205243, 1220256, 1221485, 1221585, 1212309, 1210576, 1222547, 1213258, 1213316, 1220808, 1217313, 1208381, 1222269, 1224265, 1222444, 1216452, 1217936, 1226556, 1205959, 1205102, 1208383, 1223331, 1210315, 1212066, 1217526, 1220828, 1225781, 1223225, 1214770, 1220266, 1216573, 1224454, 1210504, 1225045, 1224453, 122…	1167	416	3361	1.26694	0.0121795	0.00610838	0.0384066
SP_PIR_KEYWORDS	atp-binding	145	1.56757	8.39354e-05	1226848, 1225595, 1227404, 1209309, 1209254, 1225793, 1215625, 1212195, 1205243, 1220256, 1221585, 1210576, 1212309, 1222547, 1213258, 1213316, 1220808, 1224265, 1222444, 1217936, 1205102, 1223331, 1210315, 1224102, 1212066, 1217526, 1225781, 1214770, 1220266, 1216573, 1224454, 1223958, 1225045, 1219616, 1224857, 1225189, 1225435, 1206642, 1210207, 1222105, 1218720, 1213999, 1210753, 1224981, 120…	1167	324	3361	1.2889	0.0373105	0.0125948	0.119126
SP_PIR_KEYWORDS	alternative splicing	70	0.756757	0.000199526	1219474, 1211418, 1207146, 1218450, 1210849, 1226173, 1212702, 1213251, 1205088, 1220256, 1210805, 1217310, 1217736, 1209015, 1209961, 1213115, 1209863, 1210889, 1223130, 1222472, 1209117, 1224106, 1213442, 1210315, 1209422, 1224411, 1205429, 1222113, 1218132, 1227361, 1209087, 1207407, 1218943, 1223229, 1216861, 1218138, 1214305, 1225022, 1212503, 1227007, 1213574, 1223951, 1210161, 1211604, 122…	1167	140	3361	1.44002	0.0864292	0.0223452	0.282963
SP_PIR_KEYWORDS	chromatin regulator	24	0.259459	0.000311193	1220349, 1207703, 1225584, 1215550, 1221891, 1220508, 1219159, 1205429, 1205402, 1214782, 1227364, 1214967, 1217432, 1220230, 1217589, 1219831, 1213353, 1226448, 1222403, 1218202, 1214004, 1209698, 1206974, 1218404	1167	36	3361	1.92002	0.131504	0.0278046	0.441001
SP_PIR_KEYWORDS	collagen	19	0.205405	0.000673748	1208093, 1222002, 1208696, 1211915, 1212119, 1209422, 1224411, 1222133, 1218132, 1220547, 1222655, 1213629, 1216861, 1225348, 1205336, 1205912, 1223951, 1224394, 1216489	1167	27	3361	2.02669	0.263106	0.0496121	0.952508
SP_PIR_KEYWORDS	coiled coil	95	1.02703	0.00140081	1217489, 1224564, 1227609, 1211418, 1216060, 1213567, 1212702, 1219643, 1206857, 1215625, 1213629, 1213212, 1205243, 1207494, 1227602, 1211551, 1217736, 1209963, 1224891, 1211654, 1214644, 1223131, 1208093, 1210315, 1207703, 1209422, 1224411, 1210934, 1207803, 1218131, 1227361, 1216668, 1218132, 1207407, 1216573, 1215033, 1226875, 1216861, 1224310, 1212503, 1214434, 1227466, 1227007, 1214159, 121…	1167	211	3361	1.2967	0.47007	0.0867227	1.97092
SP_PIR_KEYWORDS	tyrosine-protein kinase	30	0.324324	0.00204738	1206642, 1209309, 1210796, 1218451, 1214428, 1216440, 1212195, 1210805, 1211272, 1225957, 1219413, 1222472, 1224302, 1227524, 1205075, 1211165, 1225642, 1219734, 1225781, 1209087, 1208414, 1209816, 1218138, 1226024, 1220737, 1218900, 1214479, 1224857, 1225189, 1211062	1167	53	3361	1.63021	0.604821	0.109571	2.86841
SP_PIR_KEYWORDS	actin-binding	30	0.324324	0.00298238	1227254, 1220198, 1211418, 1227257, 1221958, 1227295, 1215625, 1206180, 1220936, 1211533, 1212017, 1212260, 1212940, 1216492, 1227490, 1213442, 1215415, 1221896, 1210315, 1218131, 1227361, 1222750, 1211281, 1206771, 1214305, 1218382, 1219307, 1216383, 1215411, 1210524	1167	54	3361	1.60002	0.741545	0.139582	4.15274
SP_PIR_KEYWORDS	egf-like domain	31	0.335135	0.00380242	1211030, 1214011, 1223822, 1219598, 1226779, 1226799, 1217393, 1211535, 1223073, 1208858, 1215687, 1224941, 1208191, 1223130, 1205822, 1214015, 1214084, 1221161, 1226342, 1210331, 1223373, 1211372, 1214986, 1225215, 1216764, 1215825, 1227007, 1225414, 1210161, 1221811, 1212877	1167	57	3361	1.56633	0.821966	0.158507	5.26617
SP_PIR_KEYWORDS	wd repeat	39	0.421622	0.00519248	1218228, 1211724, 1210798, 1220054, 1214582, 1219789, 1214782, 1221416, 1220929, 1227479, 1219831, 1220145, 1219078, 1226772, 1207577, 1223511, 1224943, 1213612, 1207916, 1208273, 1208290, 1215157, 1208647, 1212143, 1205567, 1222071, 1227550, 1227364, 1216281, 1224970, 1208529, 1207067, 1209977, 1218050, 1225767, 1212931, 1218368, 1220060, 1205562	1167	77	3361	1.45872	0.905421	0.192969	7.1261
SP_PIR_KEYWORDS	cytoskeleton	41	0.443243	0.0054188	1227254, 1207146, 1210798, 1211418, 1227609, 1227257, 1211316, 1227357, 1212170, 1213999, 1227011, 1220936, 1211533, 1226796, 1209914, 1215714, 1212260, 1227666, 1212940, 1220104, 1213442, 1215415, 1224558, 1213655, 1213801, 1224578, 1216800, 1216668, 1227361, 1216348, 1224454, 1224310, 1207873, 1224299, 1216360, 1219040, 1216383, 1215411, 1218520, 1222718, 1206567	1167	82	3361	1.44002	0.914684	0.185447	7.4257
SP_PIR_KEYWORDS	zinc	119	1.28649	0.0081973	1205105, 1207146, 1207041, 1209436, 1216759, 1212604, 1208825, 1213830, 1220256, 1210224, 1214502, 1224464, 1218101, 1211551, 1213258, 1219683, 1218202, 1206225, 1206438, 1218417, 1227195, 1221803, 1214572, 1221891, 1213635, 1205429, 1222113, 1207547, 1223959, 1214434, 1221599, 1220818, 1219895, 1213133, 1208945, 1213331, 1222627, 1218725, 1211533, 1224988, 1223969, 1206243, 1209481, 1219413, 121…	1167	285	3361	1.20254	0.975975	0.249354	11.0312
SP_PIR_KEYWORDS	hydroxylation	13	0.140541	0.0103979	1208093, 1222002, 1209422, 1224411, 1222133, 1218132, 1220547, 1216861, 1225348, 1223073, 1205336, 1225068, 1223951	1167	19	3361	1.97055	0.991217	0.286953	13.7938
SP_PIR_KEYWORDS	repressor	32	0.345946	0.0116608	1205105, 1207473, 1207041, 1214782, 1227604, 1210091, 1217589, 1227602, 1219831, 1213353, 1206023, 1222403, 1218202, 1206974, 1225430, 1221088, 1220508, 1213635, 1217649, 1221309, 1205429, 1205402, 1227364, 1222636, 1207172, 1212002, 1219164, 1225971, 1212832, 1214004, 1211811, 1221531	1167	63	3361	1.46287	0.995075	0.298284	15.343
SP_PIR_KEYWORDS	Immunoglobulin domain	33	0.356757	0.0136048	1226198, 1223112, 1213295, 1210849, 1218336, 1226455, 1218451, 1212195, 1219141, 1206003, 1210882, 1225191, 1222472, 1214084, 1227508, 1221161, 1216718, 1224106, 1217578, 1222098, 1214704, 1211165, 1214326, 1225642, 1227346, 1206771, 1223229, 1218138, 1214305, 1225022, 1211521, 1207344, 1224857	1167	66	3361	1.44002	0.997981	0.321472	17.677
SP_PIR_KEYWORDS	calcium	72	0.778378	0.016351	1212119, 1218450, 1205693, 1205660, 1209477, 1218764, 1213629, 1227011, 1213520, 1226799, 1217393, 1226794, 1222225, 1223073, 1227442, 1208735, 1209015, 1221116, 1213115, 1225099, 1210889, 1220194, 1226556, 1221896, 1208507, 1226939, 1214150, 1224299, 1206586, 1227709, 1211604, 1212877, 1215248, 1227254, 1221954, 1213133, 1205365, 1217669, 1221958, 1211844, 1213331, 1226779, 1205128, 1205746, 121…	1167	166	3361	1.24917	0.999429	0.355517	20.8725
SP_PIR_KEYWORDS	metalloprotease	12	0.12973	0.0195402	1225215, 1213133, 1221594, 1224313, 1215550, 1225466, 1208945, 1219190, 1222574, 1224162, 1223327, 1224166	1167	18	3361	1.92002	0.999869	0.391422	24.4387
SP_PIR_KEYWORDS	zinc-finger	71	0.767568	0.0242641	1214408, 1205105, 1226451, 1207041, 1209098, 1216759, 1220410, 1220256, 1214502, 1211551, 1218101, 1209961, 1222403, 1218202, 1206225, 1224891, 1218417, 1224136, 1227195, 1221803, 1212156, 1226460, 1221891, 1213635, 1205429, 1222113, 1212330, 1211938, 1223959, 1214434, 1206926, 1219164, 1208431, 1220818, 1214159, 1219895, 1217694, 1207473, 1208082, 1213331, 1219663, 1214319, 1211533, 1209481, 122…	1167	166	3361	1.23182	0.999985	0.443252	29.4473
SP_PIR_KEYWORDS	triple helix	8	0.0864865	0.0245688	1208093, 1222002, 1209422, 1205336, 1224411, 1223951, 1218132, 1220547	1167	10	3361	2.30403	0.999987	0.430749	29.7595
SP_PIR_KEYWORDS	rna-binding	34	0.367568	0.0252927	1227685, 1209753, 1208048, 1210207, 1218977, 1224690, 1219663, 1205243, 1214319, 1227446, 1213681, 1225857, 1214252, 1218392, 1211679, 1227240, 1219445, 1226460, 1214368, 1220326, 1205373, 1215380, 1207964, 1226441, 1218943, 1212832, 1220161, 1214531, 1219994, 1226800, 1222716, 1206389, 1205486, 1209020	1167	71	3361	1.37917	0.999991	0.424559	30.4961
SP_PIR_KEYWORDS	sh3 domain	22	0.237838	0.0285715	1227254, 1223331, 1205039, 1206642, 1227609, 1219787, 1209281, 1226358, 1209087, 1217607, 1209816, 1205472, 1226796, 1214639, 1217193, 1215744, 1216360, 1219413, 1206438, 1223328, 1223131, 1222513	1167	42	3361	1.50859	0.999998	0.449474	33.7435
SP_PIR_KEYWORDS	cell projection	12	0.12973	0.0321109	1222225, 1210315, 1207146, 1213655, 1211316, 1223190, 1227472, 1222750, 1216383, 1222130, 1212170, 1222627	1167	19	3361	1.81897	1	0.474193	37.0903
SP_PIR_KEYWORDS	metal-binding	170	1.83784	0.0380896	1205105, 1207146, 1227404, 1209436, 1207041, 1216759, 1213629, 1212604, 1208825, 1213830, 1220256, 1210224, 1214502, 1224464, 1218101, 1211551, 1213258, 1214448, 1219683, 1218202, 1213115, 1206225, 1206438, 1218417, 1227195, 1221803, 1214572, 1222846, 1221891, 1216267, 1213635, 1222113, 1205429, 1207547, 1214434, 1223959, 1221599, 1220818, 1209183, 1219895, 1225901, 1212877, 1221695, 1213133, 120…	1167	438	3361	1.11782	1	0.519531	42.3892
SP_PIR_KEYWORDS	extracellular matrix	32	0.345946	0.039466	1211030, 1222002, 1214011, 1209450, 1213835, 1219001, 1225348, 1214015, 1214084, 1208093, 1222795, 1209422, 1216694, 1226522, 1224411, 1222133, 1224162, 1218132, 1219827, 1220547, 1224457, 1216861, 1227659, 1227431, 1205336, 1227007, 1223601, 1223951, 1221220, 1221399, 1226702, 1227517	1167	68	3361	1.35531	1	0.517907	43.5488
SP_PIR_KEYWORDS	cell membrane	91	0.983784	0.0396245	1225420, 1214997, 1211316, 1210849, 1226173, 1209477, 1218451, 1218764, 1206780, 1226799, 1216214, 1222225, 1226796, 1210882, 1217736, 1225191, 1209914, 1223429, 1225099, 1227470, 1210889, 1208381, 1226076, 1222472, 1223130, 1209672, 1205959, 1227508, 1218201, 1224106, 1207301, 1213442, 1222098, 1210315, 1217764, 1221921, 1209089, 1222732, 1216765, 1220525, 1225022, 1216661, 1224453, 1226081, 120…	1167	223	3361	1.17526	1	0.50561	43.6809
SP_PIR_KEYWORDS	kinase	73	0.789189	0.0403785	1226848, 1227404, 1209309, 1217773, 1225323, 1218451, 1209254, 1208403, 1216440, 1212195, 1220256, 1210805, 1221585, 1222547, 1209963, 1213258, 1218653, 1220808, 1225957, 1222472, 1222444, 1217936, 1212066, 1225642, 1225781, 1209087, 1211938, 1218138, 1225045, 1220737, 1218900, 1214479, 1225189, 1224857, 1220373, 1206642, 1217956, 1210796, 1214428, 1226302, 1207688, 1222595, 1210753, 1224981, 122…	1167	175	3361	1.20139	1	0.499185	44.3055
SP_PIR_KEYWORDS	s-adenosyl-l-methionine	8	0.0864865	0.0475718	1211774, 1218977, 1207041, 1222403, 1224994, 1214004, 1207604, 1217432	1167	11	3361	2.09457	1	0.545498	49.9495
SP_PIR_KEYWORDS	calcium transport	8	0.0864865	0.0475718	1221954, 1209015, 1212415, 1218450, 1222414, 1211604, 1213520, 1205746	1167	11	3361	2.09457	1	0.545498	49.9495
SP_PIR_KEYWORDS	methyltransferase	12	0.12973	0.0494774	1222829, 1211774, 1209925, 1212278, 1218977, 1207041, 1219582, 1222403, 1224994, 1215384, 1214004, 1217432	1167	20	3361	1.72802	1	0.547354	51.3529
SP_PIR_KEYWORDS	bromodomain	7	0.0756757	0.0511492	1220520, 1206766, 1214556, 1207605, 1214713, 1218404, 1213408	1167	9	3361	2.24003	1	0.547427	52.5539
SP_PIR_KEYWORDS	hydroxyproline	7	0.0756757	0.0511492	1205336, 1224411, 1222133, 1223951, 1218132, 1220547, 1216861	1167	9	3361	2.24003	1	0.547427	52.5539
SP_PIR_KEYWORDS	thick filament	7	0.0756757	0.0511492	1214305, 1219307, 1227295, 1215625, 1206771, 1227490, 1210524	1167	9	3361	2.24003	1	0.547427	52.5539
SP_PIR_KEYWORDS	trimer	5	0.0540541	0.0521938	1208093, 1222002, 1209422, 1205336, 1220547	1167	5	3361	2.88003	1	0.543117	53.2902
SP_PIR_KEYWORDS	gpi-anchor	13	0.140541	0.0880801	1227034, 1222098, 1210849, 1219141, 1216661, 1210882, 1225191, 1227470, 1207071, 1210889, 1226076, 1226702, 1207344	1167	24	3361	1.56002	1	0.728895	72.9998
SP_PIR_KEYWORDS	Aminoacyl-tRNA synthetase	7	0.0756757	0.0910196	1207109, 1216101, 1224824, 1222105, 1218392, 1220664, 1205038	1167	10	3361	2.01602	1	0.730185	74.2097
SP_PIR_KEYWORDS	DNA damage	17	0.183784	0.091639	1212089, 1214582, 1213801, 1226093, 1220293, 1216573, 1214967, 1220230, 1218785, 1217424, 1224019, 1219934, 1222547, 1226448, 1220003, 1220060, 1220104	1167	34	3361	1.44002	1	0.722121	74.4581
SP_PIR_KEYWORDS	calmodulin-binding	10	0.108108	0.0940681	1227254, 1221954, 1210315, 1218131, 1212260, 1227346, 1215625, 1212940, 1206180, 1227490	1167	17	3361	1.69414	1	0.721584	75.4111
UP_SEQ_FEATURE	domain:Fibronectin type-III 2	28	0.302703	1.16113e-06	1211030, 1223112, 1209309, 1214835, 1206003, 1210805, 1210882, 1227508, 1210331, 1224106, 1222098, 1205075, 1209422, 1224411, 1214326, 1213204, 1208414, 1206771, 1214305, 1226024, 1225022, 1227007, 1208478, 1214479, 1207344, 1221399, 1225189, 1211062	694	38	2121	2.25193	0.00227208	0.00227208	0.00199151
UP_SEQ_FEATURE	domain:Fibronectin type-III 1	28	0.302703	1.16113e-06	1211030, 1223112, 1209309, 1214835, 1206003, 1210805, 1210882, 1227508, 1210331, 1224106, 1222098, 1205075, 1209422, 1224411, 1214326, 1213204, 1208414, 1206771, 1214305, 1226024, 1225022, 1227007, 1208478, 1214479, 1207344, 1221399, 1225189, 1211062	694	38	2121	2.25193	0.00227208	0.00227208	0.00199151
UP_SEQ_FEATURE	splice variant	63	0.681081	2.03826e-05	1219474, 1211418, 1207146, 1218450, 1210849, 1226173, 1212702, 1213251, 1205088, 1220256, 1210805, 1217310, 1217736, 1226796, 1209015, 1209961, 1213115, 1209863, 1210889, 1223130, 1222472, 1209117, 1224106, 1213442, 1210315, 1224411, 1205429, 1222113, 1227361, 1209087, 1218943, 1223229, 1216861, 1214305, 1225022, 1227007, 1213574, 1210161, 1211604, 1224857, 1212877, 1211030, 1214011, 1211535, 122…	694	123	2121	1.56537	0.0391433	0.019767	0.0349538
UP_SEQ_FEATURE	domain:Fibronectin type-III 3	19	0.205405	5.93485e-05	1211030, 1224106, 1222098, 1223112, 1209422, 1224411, 1214835, 1214326, 1213204, 1206771, 1206003, 1214305, 1225022, 1210882, 1227007, 1208478, 1214479, 1221399, 1227508	694	25	2121	2.32271	0.109763	0.0380143	0.101744
UP_SEQ_FEATURE	domain:Fibronectin type-III 4	17	0.183784	0.000129591	1211030, 1224106, 1222098, 1223112, 1209422, 1224411, 1214835, 1214326, 1213204, 1206003, 1225022, 1210882, 1227007, 1208478, 1214479, 1221399, 1227508	694	22	2121	2.36161	0.224219	0.061499	0.222038
UP_SEQ_FEATURE	domain:Fibronectin type-III 8	10	0.108108	0.000290278	1211030, 1209422, 1227007, 1224411, 1214835, 1208478, 1214479, 1221399, 1227508, 1206003	694	10	2121	3.0562	0.43376	0.107517	0.496709
UP_SEQ_FEATURE	domain:Fibronectin type-III 5	13	0.140541	0.000616516	1224106, 1211030, 1209422, 1223112, 1224411, 1214835, 1206003, 1225022, 1227007, 1208478, 1214479, 1221399, 1227508	694	16	2121	2.48316	0.701244	0.182377	1.05218
UP_SEQ_FEATURE	compositionally biased region:Poly-Asp	9	0.0972973	0.000809641	1224019, 1219445, 1226707, 1214434, 1207703, 1218641, 1219643, 1205243, 1218404	694	9	2121	3.0562	0.795406	0.202821	1.37962
UP_SEQ_FEATURE	domain:Fibronectin type-III 7	9	0.0972973	0.000809641	1211030, 1209422, 1227007, 1224411, 1214835, 1208478, 1214479, 1227508, 1206003	694	9	2121	3.0562	0.795406	0.202821	1.37962
UP_SEQ_FEATURE	nucleotide phosphate-binding region:ATP	61	0.659459	0.000838926	1227404, 1209309, 1218451, 1215625, 1212195, 1205243, 1205088, 1220256, 1210805, 1227446, 1209963, 1213258, 1222472, 1222444, 1218392, 1224265, 1210357, 1210315, 1207703, 1218131, 1225642, 1220293, 1209087, 1216573, 1224454, 1218138, 1218900, 1217768, 1214479, 1225189, 1224857, 1206642, 1210207, 1226302, 1214428, 1218720, 1206180, 1210753, 1222627, 1218785, 1219413, 1227666, 1210416, 1227490, 121…	694	131	2121	1.42311	0.806823	0.185775	1.42919
UP_SEQ_FEATURE	domain:Fibronectin type-III 9	8	0.0864865	0.00223095	1211030, 1227007, 1224411, 1214835, 1208478, 1214479, 1227508, 1206003	694	8	2121	3.0562	0.987416	0.385008	3.75827
UP_SEQ_FEATURE	domain:Fibronectin type-III 6	9	0.0972973	0.00288709	1211030, 1209422, 1227007, 1224411, 1214835, 1208478, 1214479, 1227508, 1206003	694	10	2121	2.75058	0.996531	0.432435	4.83804
UP_SEQ_FEATURE	domain:EGF-like 2	10	0.108108	0.00322102	1211030, 1211535, 1214011, 1223073, 1227007, 1224941, 1208191, 1210161, 1226779, 1226342	694	12	2121	2.54683	0.9982	0.437048	5.38318
UP_SEQ_FEATURE	domain:EGF-like 1	12	0.12973	0.00327285	1211030, 1225215, 1211535, 1214011, 1224941, 1208191, 1210161, 1214015, 1226779, 1214084, 1212877, 1226342	694	16	2121	2.29215	0.998375	0.414429	5.46752
UP_SEQ_FEATURE	repeat:WD 2	19	0.205405	0.00475086	1218228, 1211724, 1214582, 1210798, 1219789, 1205567, 1214782, 1227364, 1224970, 1227479, 1219831, 1207067, 1220145, 1218050, 1207577, 1218368, 1224943, 1220060, 1205562	694	32	2121	1.81462	0.999911	0.51209	7.84323
UP_SEQ_FEATURE	repeat:WD 1	19	0.205405	0.00475086	1218228, 1211724, 1214582, 1210798, 1219789, 1205567, 1214782, 1227364, 1224970, 1227479, 1219831, 1207067, 1220145, 1218050, 1207577, 1218368, 1224943, 1220060, 1205562	694	32	2121	1.81462	0.999911	0.51209	7.84323
UP_SEQ_FEATURE	repeat:WD 3	18	0.194595	0.00545753	1218228, 1211724, 1214582, 1210798, 1219789, 1205567, 1214782, 1227364, 1224970, 1227479, 1219831, 1207067, 1220145, 1218050, 1207577, 1224943, 1220060, 1205562	694	30	2121	1.83372	0.999978	0.535018	8.95915
UP_SEQ_FEATURE	topological domain:Extracellular	95	1.02703	0.00554372	1225420, 1227404, 1209309, 1218450, 1226173, 1222574, 1218451, 1215163, 1218764, 1213629, 1212195, 1226947, 1227011, 1213212, 1210805, 1205525, 1225099, 1218602, 1213115, 1226716, 1222472, 1223130, 1217632, 1221386, 1209672, 1227508, 1224181, 1207301, 1224106, 1225603, 1209318, 1225642, 1224610, 1209089, 1223229, 1216765, 1208780, 1218138, 1219824, 1225022, 1224299, 1217144, 1225237, 1222212, 122…	694	233	2121	1.24609	0.999981	0.516171	9.09438
UP_SEQ_FEATURE	domain:Helicase ATP-binding	11	0.118919	0.00707771	1219445, 1212089, 1207703, 1210207, 1217768, 1220293, 1207964, 1224265, 1205243, 1218785, 1227446	694	15	2121	2.24121	0.999999	0.580905	11.4697
UP_SEQ_FEATURE	domain:SAM	9	0.0972973	0.00756489	1226024, 1205075, 1209309, 1208414, 1205562, 1225189, 1211062, 1210805, 1224280	694	11	2121	2.50052	1	0.583161	12.2118
UP_SEQ_FEATURE	glycosylation site:N-linked (GlcNAc...)	156	1.68649	0.00841801	1225420, 1212119, 1227404, 1209309, 1210849, 1226173, 1218764, 1213835, 1224469, 1226947, 1212195, 1227011, 1225058, 1225191, 1214448, 1220648, 1211253, 1218602, 1223130, 1221386, 1224181, 1224106, 1209422, 1225603, 1209318, 1216267, 1223229, 1208780, 1214240, 1212503, 1225022, 1227007, 1224765, 1217699, 1211549, 1207344, 1221399, 1206820, 1224857, 1225189, 1212877, 1212570, 1226198, 1222002, 122…	694	410	2121	1.16285	1	0.601496	13.4972
UP_SEQ_FEATURE	binding site:ATP	38	0.410811	0.00875743	1206642, 1227404, 1209309, 1218451, 1226302, 1214428, 1212195, 1220256, 1210753, 1210805, 1222627, 1209963, 1209015, 1213258, 1224824, 1219413, 1222472, 1218392, 1222444, 1224059, 1210416, 1205075, 1213801, 1207691, 1216102, 1225642, 1227346, 1209087, 1208414, 1209816, 1218138, 1226024, 1218900, 1219909, 1214479, 1224857, 1225189, 1211062	694	81	2121	1.43377	1	0.596232	14.0037
UP_SEQ_FEATURE	domain:Protein kinase	31	0.335135	0.0114256	1206642, 1227404, 1209309, 1218451, 1214428, 1212195, 1220256, 1210753, 1222627, 1210805, 1209963, 1213258, 1219413, 1222472, 1222444, 1210416, 1215244, 1205075, 1213801, 1225642, 1227346, 1209087, 1208414, 1209816, 1218138, 1226024, 1219909, 1214479, 1224857, 1225189, 1211062	694	64	2121	1.48034	1	0.675537	17.8888
UP_SEQ_FEATURE	compositionally biased region:Ser-rich	17	0.183784	0.0147964	1214368, 1207147, 1213635, 1210867, 1218764, 1212557, 1218943, 1225058, 1221722, 1211551, 1209963, 1225099, 1225387, 1214556, 1222718, 1225072, 1226652	694	30	2121	1.73184	1	0.751075	22.5608
UP_SEQ_FEATURE	domain:Helicase C-terminal	10	0.108108	0.0148877	1219445, 1212089, 1207703, 1210207, 1217768, 1220293, 1207964, 1224265, 1205243, 1227446	694	14	2121	2.183	1	0.737012	22.6839
UP_SEQ_FEATURE	domain:Ig-like C2-type 6	10	0.108108	0.0148877	1214305, 1224106, 1225022, 1222098, 1210882, 1222472, 1227346, 1206771, 1227508, 1206003	694	14	2121	2.183	1	0.737012	22.6839
UP_SEQ_FEATURE	repeat:WD 4	16	0.172973	0.0172348	1218228, 1214582, 1210798, 1219789, 1205567, 1214782, 1227364, 1224970, 1227479, 1219831, 1207067, 1220145, 1218050, 1224943, 1220060, 1205562	694	28	2121	1.7464	1	0.772533	25.7833
UP_SEQ_FEATURE	lipid moiety-binding region:GPI-anchor amidated serine	8	0.0864865	0.0172819	1216661, 1227034, 1222098, 1210882, 1207071, 1227470, 1226076, 1219141	694	10	2121	2.44496	1	0.759001	25.8443
UP_SEQ_FEATURE	domain:EGF-like 4	7	0.0756757	0.0175312	1211030, 1214011, 1227007, 1224941, 1210161, 1212877, 1226342	694	8	2121	2.67417	1	0.749909	26.1664
UP_SEQ_FEATURE	repeat:WD 7	11	0.118919	0.0232108	1219831, 1207067, 1218228, 1220145, 1218050, 1214582, 1205567, 1214782, 1224970, 1205562, 1227479	694	17	2121	1.97754	1	0.829575	33.1552
UP_SEQ_FEATURE	domain:Ig-like C2-type 5	11	0.118919	0.0232108	1214305, 1224106, 1225022, 1222098, 1210882, 1222472, 1227346, 1212195, 1206771, 1227508, 1206003	694	17	2121	1.97754	1	0.829575	33.1552
UP_SEQ_FEATURE	repeat:WD 6	14	0.151351	0.0234201	1218228, 1214582, 1205567, 1214782, 1227364, 1224970, 1227479, 1219831, 1207067, 1220145, 1218050, 1224943, 1220060, 1205562	694	24	2121	1.78278	1	0.82084	33.4004
UP_SEQ_FEATURE	compositionally biased region:Cys-rich	13	0.140541	0.0273247	1211030, 1205075, 1209309, 1212702, 1208414, 1219001, 1210805, 1226024, 1222403, 1225185, 1214638, 1225189, 1211062	694	22	2121	1.80593	1	0.85606	37.8231
UP_SEQ_FEATURE	repeat:WD 5	15	0.162162	0.0294862	1218228, 1214582, 1219789, 1205567, 1214782, 1227364, 1224970, 1227479, 1219831, 1207067, 1220145, 1218050, 1224943, 1220060, 1205562	694	27	2121	1.69789	1	0.867583	40.1508
UP_SEQ_FEATURE	domain:Ig-like C2-type 3	15	0.162162	0.0294862	1224106, 1222098, 1210849, 1218336, 1225642, 1227346, 1212195, 1206771, 1206003, 1214305, 1225022, 1210882, 1225191, 1222472, 1227508	694	27	2121	1.69789	1	0.867583	40.1508
UP_SEQ_FEATURE	domain:Ig-like C2-type 1	17	0.183784	0.0303563	1224106, 1222098, 1210849, 1218336, 1225642, 1227346, 1212195, 1206771, 1206003, 1218138, 1214305, 1225022, 1210882, 1225191, 1222472, 1224857, 1227508	694	32	2121	1.6236	1	0.86641	41.0645
UP_SEQ_FEATURE	domain:Cadherin 5	8	0.0864865	0.0342866	1221722, 1211844, 1224505, 1225099, 1210889, 1218764, 1225072, 1205128	694	11	2121	2.22269	1	0.889717	45.0303
UP_SEQ_FEATURE	domain:Cadherin 4	8	0.0864865	0.0342866	1221722, 1211844, 1224505, 1225099, 1210889, 1218764, 1225072, 1205128	694	11	2121	2.22269	1	0.889717	45.0303
UP_SEQ_FEATURE	domain:Cadherin 2	8	0.0864865	0.0342866	1221722, 1211844, 1224505, 1225099, 1210889, 1218764, 1225072, 1205128	694	11	2121	2.22269	1	0.889717	45.0303
UP_SEQ_FEATURE	domain:Ig-like C2-type	8	0.0864865	0.0342866	1226198, 1213295, 1226455, 1211521, 1214326, 1207344, 1221161, 1223229	694	11	2121	2.22269	1	0.889717	45.0303
UP_SEQ_FEATURE	domain:EGF-like 3	8	0.0864865	0.0342866	1211030, 1211535, 1214011, 1227007, 1224941, 1210161, 1212877, 1226342	694	11	2121	2.22269	1	0.889717	45.0303
UP_SEQ_FEATURE	domain:Cadherin 3	8	0.0864865	0.0342866	1221722, 1211844, 1224505, 1225099, 1210889, 1218764, 1225072, 1205128	694	11	2121	2.22269	1	0.889717	45.0303
UP_SEQ_FEATURE	domain:Cadherin 1	8	0.0864865	0.0342866	1221722, 1211844, 1224505, 1225099, 1210889, 1218764, 1225072, 1205128	694	11	2121	2.22269	1	0.889717	45.0303
UP_SEQ_FEATURE	domain:Ig-like C2-type 4	11	0.118919	0.0372637	1214305, 1224106, 1225022, 1222098, 1210882, 1222472, 1227346, 1212195, 1206771, 1227508, 1206003	694	18	2121	1.86768	1	0.902199	47.8656
UP_SEQ_FEATURE	active site:Proton acceptor	38	0.410811	0.0378649	1206642, 1227404, 1209309, 1218451, 1226302, 1214428, 1212195, 1220256, 1210753, 1210805, 1207838, 1209963, 1219413, 1222472, 1222444, 1224969, 1210416, 1218178, 1205075, 1213801, 1219770, 1225642, 1227346, 1209087, 1208414, 1209816, 1218138, 1213607, 1226024, 1219909, 1218900, 1214479, 1205515, 1224857, 1225189, 1205217, 1211062, 1208503	694	88	2121	1.31972	1	0.898881	48.4212
UP_SEQ_FEATURE	domain:Fibronectin type-III	6	0.0648649	0.0413156	1218132, 1227346, 1219141, 1221399, 1206820, 1207172	694	7	2121	2.6196	1	0.912058	51.5038
UP_SEQ_FEATURE	domain:Ig-like C2-type 2	17	0.183784	0.041583	1224106, 1222098, 1210849, 1218336, 1225642, 1227346, 1212195, 1206771, 1206003, 1218138, 1214305, 1225022, 1210882, 1225191, 1222472, 1224857, 1227508	694	33	2121	1.5744	1	0.907193	51.7353
UP_SEQ_FEATURE	domain:Fibronectin type-III 10	5	0.0540541	0.0419004	1227007, 1224411, 1214835, 1227508, 1206003	694	5	2121	3.0562	1	0.902629	52.0087
UP_SEQ_FEATURE	domain:Fibronectin type-III 11	5	0.0540541	0.0419004	1227007, 1224411, 1221399, 1227508, 1206003	694	5	2121	3.0562	1	0.902629	52.0087
UP_SEQ_FEATURE	short sequence motif:PDZ-binding	10	0.108108	0.0435529	1226024, 1205075, 1209309, 1218602, 1226716, 1208414, 1225189, 1211062, 1210805, 1208780	694	16	2121	1.91012	1	0.90536	53.4088
UP_SEQ_FEATURE	topological domain:Cytoplasmic	110	1.18919	0.0534301	1225420, 1227404, 1209309, 1226173, 1218764, 1224469, 1213629, 1212195, 1226947, 1227011, 1214448, 1211253, 1218602, 1213115, 1223130, 1217632, 1221386, 1226556, 1224181, 1224106, 1225603, 1209318, 1223229, 1216765, 1208780, 1225022, 1212503, 1225237, 1224765, 1217699, 1211549, 1206820, 1225189, 1224857, 1212877, 1212570, 1223190, 1214835, 1206741, 1211535, 1211700, 1219955, 1220760, 1206697, 122…	694	295	2121	1.1396	1	0.941033	61.0076
UP_SEQ_FEATURE	compositionally biased region:Poly-Glu	22	0.237838	0.0552631	1215226, 1208583, 1218450, 1207041, 1208817, 1219643, 1207964, 1227346, 1222636, 1211362, 1205243, 1217589, 1227602, 1224019, 1226031, 1209963, 1213992, 1220003, 1212260, 1214556, 1221833, 1227508	694	47	2121	1.43056	1	0.942476	62.2826
UP_SEQ_FEATURE	compositionally biased region:Gln-rich	7	0.0756757	0.0695337	1205105, 1207703, 1218816, 1213635, 1213574, 1217289, 1210224	694	10	2121	2.13934	1	0.970683	70.9487
UP_SEQ_FEATURE	domain:Myosin head-like	6	0.0648649	0.0809562	1210315, 1218131, 1222750, 1215625, 1206180, 1227490	694	8	2121	2.29215	1	0.982291	76.4952
UP_SEQ_FEATURE	propeptide:Removed in mature form	17	0.183784	0.0921841	1227034, 1222098, 1210849, 1219141, 1220525, 1216661, 1210882, 1225191, 1219863, 1223870, 1227470, 1207071, 1226076, 1208381, 1210889, 1207344, 1226702	694	36	2121	1.4432	1	0.989013	80.9632
UP_SEQ_FEATURE	repeat:ANK 7	5	0.0540541	0.0934409	1214808, 1218402, 1217012, 1224968, 1221803	694	6	2121	2.54683	1	0.988544	81.4102
UP_SEQ_FEATURE	domain:PAC	5	0.0540541	0.0934409	1216589, 1225068, 1213574, 1212557, 1217289	694	6	2121	2.54683	1	0.988544	81.4102
UP_SEQ_FEATURE	domain:PAS 1	5	0.0540541	0.0934409	1216589, 1225068, 1213574, 1212557, 1217289	694	6	2121	2.54683	1	0.988544	81.4102
UP_SEQ_FEATURE	domain:PAS 2	5	0.0540541	0.0934409	1216589, 1225068, 1213574, 1212557, 1217289	694	6	2121	2.54683	1	0.988544	81.4102
UP_SEQ_FEATURE	region of interest:Actin-binding	5	0.0540541	0.0934409	1210315, 1218131, 1215625, 1206180, 1227490	694	6	2121	2.54683	1	0.988544	81.4102
UP_TISSUE	Bursa	556	6.01081	0.0344555	1226848, 1225595, 1207147, 1220054, 1220848, 1226171, 1208825, 1221416, 1212385, 1221119, 1214376, 1213923, 1208273, 1218492, 1221212, 1211150, 1207448, 1205190, 1219613, 1219610, 1208914, 1207803, 1225580, 1208958, 1220839, 1214770, 1205449, 1207547, 1208288, 1206962, 1214779, 1225045, 1214639, 1206014, 1221713, 1225180, 1225184, 1213106, 1224055, 1226195, 1206187, 1221433, 1208945, 1224154, 122…	1250	1475	3481	1.04973	0.989519	0.989519	33.5239
UP_TISSUE	Brain	82	0.886486	0.0675841	1214409, 1220198, 1214997, 1211418, 1208778, 1218450, 1206128, 1211297, 1212195, 1210805, 1216214, 1220985, 1210882, 1225952, 1225191, 1209914, 1220785, 1209961, 1213115, 1226076, 1209012, 1206438, 1223130, 1223131, 1205666, 1205822, 1224969, 1208507, 1205589, 1226939, 1218131, 1209385, 1227550, 1222732, 1213204, 1210505, 1224454, 1225022, 1212503, 1224299, 1216661, 1220733, 1206113, 1213574, 122…	1250	197	3481	1.15916	0.999888	0.989417	55.732

## Sheet: DAVID_Chart_ZebraFinch
Category	Term	Count	%	PValue	Genes	List Total	Pop Hits	Pop Total	Fold Enrichment	Bonferroni	Benjamini	FDR		Background =	Zebra Finch
CHROMOSOME	2	484	5.23243	7.25873e-11	251013, 251860, 274814, 261112, 276384, 262242, 251223, 248250, 261257, 258073, 254512, 262795, 275553, 276371, 263359, 271959, 245698, 264706, 267428, 254400, 267425, 262260, 271856, 267002, 248977, 256586, 254331, 258499, 261230, 264322, 257905, 250213, 251309, 275674, 264734, 251705, 255091, 251008, 272080, 256462, 276052, 245774, 246902, 258599, 247014, 248156, 255585, 262491, 261214, 268994,…	4721	1289	16012	1.27351	2.54055e-09	2.54055e-09	6.42951e-08
CHROMOSOME	1	387	4.18378	1.2353e-07	258876, 258878, 263171, 248861, 261261, 267431, 263157, 256679, 272710, 254509, 269295, 274941, 272199, 256587, 264329, 251986, 272827, 262266, 263486, 248234, 250498, 263145, 276061, 263289, 262677, 275574, 245883, 274973, 263493, 274970, 272183, 254322, 271581, 250305, 259752, 264139, 267250, 246293, 255283, 270274, 251056, 248007, 271515, 271314, 251927, 245523, 275594, 254456, 268587, 265353,…	4721	1053	16012	1.24651	4.32355e-06	2.16178e-06	0.000109418
CHROMOSOME	3	406	4.38919	1.54598e-07	264510, 251011, 267906, 264206, 263168, 258736, 257929, 262650, 275556, 264711, 248055, 246107, 254418, 267331, 251851, 272816, 259997, 271959, 256680, 262395, 263160, 263354, 254507, 248060, 254505, 248850, 255998, 251417, 251416, 248064, 258309, 254332, 246711, 245892, 256651, 271574, 256448, 275985, 255087, 259083, 258099, 256641, 263149, 271982, 258614, 250214, 272164, 267105, 267915, 267450,…	4721	1113	16012	1.23721	5.41091e-06	1.80364e-06	0.000136937
CHROMOSOME	6	203	2.19459	1.84537e-07	253064, 252697, 273831, 253337, 254921, 247995, 258735, 270811, 269282, 250996, 269885, 246108, 259349, 274818, 259998, 259343, 250160, 266648, 263645, 257210, 249025, 263060, 247068, 247067, 274945, 257206, 257205, 266456, 260789, 263485, 271700, 257907, 247595, 253555, 258617, 272975, 273960, 272182, 275972, 266669, 251990, 269760, 253855, 248041, 259316, 259318, 266452, 254825, 250090, 253198,…	4721	505	16012	1.36338	6.45878e-06	1.6147e-06	0.000163456
CHROMOSOME	4	265	2.86486	1.25717e-05	270608, 251863, 271451, 249136, 270406, 270210, 273195, 275940, 266380, 253474, 264209, 270813, 262651, 270015, 269994, 257922, 265998, 267318, 256764, 257487, 272461, 254305, 253939, 262253, 263503, 266991, 271460, 258484, 264219, 261395, 269132, 252485, 253735, 271066, 266791, 260274, 272318, 267920, 273020, 254808, 251845, 263617, 271572, 275828, 267929, 258206, 260783, 246919, 256238, 256988,…	4721	720	16012	1.24832	0.000439917	8.79989e-05	0.011135
CHROMOSOME	5	318	3.43784	2.20806e-05	258877, 264200, 259353, 248855, 261253, 262248, 250475, 268144, 254212, 250998, 253161, 253884, 262250, 272188, 249633, 274103, 265909, 271566, 254204, 259435, 260632, 267528, 264017, 274809, 273812, 271848, 258598, 273598, 246512, 276261, 261137, 257842, 254804, 248133, 269146, 264733, 251403, 245886, 247396, 258718, 248226, 260286, 262271, 259088, 250824, 248460, 248466, 250180, 248246, 267701,…	4721	888	16012	1.21458	0.000772529	0.000128796	0.0195564
CHROMOSOME	Z	274	2.96216	2.3505e-05	267813, 254313, 260129, 269894, 266076, 257822, 251962, 265398, 275699, 266584, 248862, 269261, 256866, 256862, 271862, 252498, 248426, 261269, 258339, 273034, 266081, 250845, 257710, 252873, 257607, 274568, 269664, 267723, 248848, 248116, 272713, 261641, 264117, 260636, 253540, 271858, 246114, 249117, 266269, 267323, 273027, 260104, 247791, 264130, 260005, 248134, 267441, 253454, 258495, 251106,…	4721	753	16012	1.23415	0.000822346	0.000117519	0.0208179
CHROMOSOME	1A	296	3.2	0.00033295	254310, 251963, 272433, 263463, 273049, 266074, 271552, 259496, 274431, 263774, 273187, 250994, 274101, 267517, 266992, 268286, 271057, 253344, 272421, 266187, 245418, 248843, 276067, 270205, 255992, 252093, 258086, 270007, 267133, 256584, 274018, 263259, 261238, 266192, 269650, 257371, 249152, 257372, 251108, 262670, 248128, 257908, 272167, 251402, 245885, 262774, 268015, 258613, 249703, 266251,…	4721	848	16012	1.18388	0.0115875	0.00145584	0.294529
CHROMOSOME	9	156	1.68649	0.000374427	248431, 247923, 252693, 264306, 265249, 247821, 261961, 272109, 273240, 257138, 245770, 266386, 270689, 267904, 257142, 261306, 247437, 255537, 249899, 251428, 261321, 265719, 252494, 254869, 268557, 260303, 269463, 272469, 267085, 265318, 266083, 254880, 266568, 254099, 255918, 274943, 246273, 245355, 263055, 266369, 267898, 261640, 248783, 272518, 245554, 249118, 264605, 256296, 253275, 275469,…	4721	417	16012	1.26882	0.0130219	0.00145532	0.331166
CHROMOSOME	7	176	1.9027	0.00105878	272432, 272806, 269098, 265321, 264303, 260620, 256666, 258076, 250719, 274959, 252758, 257546, 275555, 267613, 262591, 275756, 248053, 254725, 248248, 264408, 263957, 248262, 251217, 266270, 270555, 276271, 259724, 259487, 249023, 267223, 260581, 250060, 269126, 249973, 255548, 246271, 262022, 261789, 272054, 272905, 245968, 271063, 246377, 266471, 260535, 262123, 258341, 245895, 252840, 252225,…	4721	487	16012	1.22573	0.0363981	0.00370083	0.933937
CHROMOSOME	11	116	1.25405	0.0294883	259857, 256568, 246379, 264417, 259715, 254666, 265467, 260067, 266854, 261325, 246104, 276379, 256769, 268840, 262657, 270604, 260483, 260585, 261958, 257717, 272114, 273758, 273440, 274779, 265723, 260736, 247899, 274011, 267233, 251297, 256589, 248975, 273592, 251982, 256990, 257782, 260705, 255398, 267234, 247505, 267240, 265831, 251408, 269827, 263528, 261241, 272448, 272409, 275111, 272074,…	4721	335	16012	1.17442	0.649226	0.090843	23.2889
COG_ONTOLOGY	Cell envelope biogenesis, outer membrane	9	0.0972973	0.0186887	266121, 252948, 260104, 261515, 255831, 255196, 269304, 258822, 251681	509	10	1191	2.10589	0.595679	0.595679	16.4767
COG_ONTOLOGY	Translation, ribosomal structure and biogenesis	30	0.324324	0.02603	264967, 253353, 272109, 275275, 263201, 276159, 261075, 275674, 258619, 248794, 251460, 256385, 276330, 262326, 253344, 246545, 269542, 271407, 255391, 254028, 248205, 266724, 276237, 263549, 260397, 259292, 246375, 266246, 272199, 245576	509	51	1191	1.3764	0.71804	0.469001	22.253
COG_ONTOLOGY	Cell division and chromosome partitioning / Cytoskeleton	9	0.0972973	0.0819139	264937, 272464, 256528, 266728, 265071, 260320, 256102, 266463, 245961	509	12	1191	1.75491	0.983465	0.745238	55.7641
COG_ONTOLOGY	RNA processing and modification	12	0.12973	0.0883726	265721, 264967, 269258, 245407, 252225, 252704, 261593, 249481, 262650, 247951, 250243, 254804	509	18	1191	1.55992	0.988218	0.670536	58.6463
CYTOBAND	2	484	5.23243	6.68631e-05	251013, 251860, 274814, 261112, 276384, 262242, 251223, 248250, 261257, 258073, 254512, 262795, 275553, 276371, 263359, 271959, 245698, 264706, 267428, 254400, 267425, 262260, 271856, 267002, 248977, 256586, 254331, 258499, 261230, 264322, 257905, 250213, 251309, 275674, 264734, 251705, 255091, 251008, 272080, 256462, 276052, 245774, 246902, 258599, 247014, 248156, 255585, 262491, 261214, 268994,…	4485	1289	13741	1.1504	0.00220412	0.00220412	0.0583465
CYTOBAND	6	203	2.19459	0.000234387	253064, 252697, 273831, 253337, 254921, 247995, 258735, 270811, 269282, 250996, 269885, 246108, 259349, 274818, 259998, 259343, 250160, 266648, 263645, 257210, 249025, 263060, 247068, 247067, 274945, 257206, 257205, 266456, 260789, 263485, 271700, 257907, 247595, 253555, 258617, 272975, 273960, 272182, 275972, 266669, 251990, 269760, 253855, 248041, 259316, 259318, 266452, 254825, 250090, 253198,…	4485	505	13741	1.23157	0.00770584	0.00386037	0.2044
CYTOBAND	1	387	4.18378	0.00222159	258876, 258878, 263171, 248861, 261261, 267431, 263157, 256679, 272710, 254509, 269295, 274941, 272199, 256587, 264329, 251986, 272827, 262266, 263486, 248234, 250498, 263145, 276061, 263289, 262677, 275574, 245883, 274973, 263493, 274970, 272183, 254322, 271581, 250305, 259752, 264139, 267250, 246293, 255283, 270274, 251056, 248007, 271515, 271314, 251927, 245523, 275594, 254456, 268587, 265353,…	4485	1053	13741	1.126	0.0707653	0.0241678	1.92255
CYTOBAND	3	406	4.38919	0.00316208	264510, 251011, 267906, 264206, 263168, 258736, 257929, 262650, 275556, 264711, 248055, 246107, 254418, 267331, 251851, 272816, 259997, 271959, 256680, 262395, 263160, 263354, 254507, 248060, 254505, 248850, 255998, 251417, 251416, 248064, 258309, 254332, 246711, 245892, 256651, 271574, 256448, 275985, 255087, 259083, 258099, 256641, 263149, 271982, 258614, 250214, 272164, 267105, 267915, 267450,…	4485	1113	13741	1.1176	0.0992377	0.0257901	2.72654
CYTOBAND	4	265	2.86486	0.0104105	270608, 251863, 271451, 249136, 270406, 270210, 273195, 275940, 266380, 253474, 264209, 270813, 262651, 270015, 269994, 257922, 265998, 267318, 256764, 257487, 272461, 254305, 253939, 262253, 263503, 266991, 271460, 258484, 264219, 261395, 269132, 252485, 253735, 271066, 266791, 260274, 272318, 267920, 273020, 254808, 251845, 263617, 271572, 275828, 267929, 258206, 260783, 246919, 256238, 256988,…	4485	720	13741	1.12764	0.292025	0.0667379	8.72965
CYTOBAND	Z	274	2.96216	0.0160911	267813, 254313, 260129, 269894, 266076, 257822, 251962, 265398, 275699, 266584, 248862, 269261, 256866, 256862, 271862, 252498, 248426, 261269, 258339, 273034, 266081, 250845, 257710, 252873, 257607, 274568, 269664, 267723, 248848, 248116, 272713, 261641, 264117, 260636, 253540, 271858, 246114, 249117, 266269, 267323, 273027, 260104, 247791, 264130, 260005, 248134, 267441, 253454, 258495, 251106,…	4485	752	13741	1.11632	0.414521	0.0853563	13.2026
CYTOBAND	5	318	3.43784	0.0247047	258877, 264200, 259353, 248855, 261253, 262248, 250475, 268144, 254212, 250998, 253161, 253884, 262250, 272188, 249633, 274103, 265909, 271566, 254204, 259435, 260632, 267528, 264017, 274809, 273812, 271848, 258598, 273598, 246512, 276261, 261137, 257842, 254804, 248133, 269146, 264733, 251403, 245886, 247396, 258718, 248226, 260286, 262271, 259088, 250824, 248460, 248466, 250180, 248246, 267701,…	4485	888	13741	1.09716	0.561981	0.11124	19.6151
CYTOBAND	9	156	1.68649	0.0262294	248431, 247923, 252693, 264306, 265249, 247821, 261961, 272109, 273240, 257138, 245770, 266386, 270689, 267904, 257142, 261306, 247437, 255537, 249899, 251428, 261321, 265719, 252494, 254869, 268557, 260303, 269463, 272469, 267085, 265318, 266083, 254880, 266568, 254099, 255918, 274943, 246273, 245355, 263055, 266369, 267898, 261640, 248783, 272518, 245554, 249118, 264605, 256296, 253275, 275469,…	4485	417	13741	1.14616	0.584023	0.103844	20.7054
CYTOBAND	7	176	1.9027	0.0634275	272432, 272806, 269098, 265321, 264303, 260620, 256666, 258076, 250719, 274959, 252758, 257546, 275555, 267613, 262591, 275756, 248053, 254725, 248248, 264408, 263957, 248262, 251217, 266270, 270555, 276271, 259724, 259487, 249023, 267223, 260581, 250060, 269126, 249973, 255548, 246271, 262022, 261789, 272054, 272905, 245968, 271063, 246377, 266471, 260535, 262123, 258341, 245895, 252840, 252225,…	4485	487	13741	1.10723	0.884955	0.213585	43.5585
CYTOBAND	1A	296	3.2	0.0909835	254310, 251963, 272433, 263463, 273049, 266074, 271552, 259496, 274431, 263774, 273187, 250994, 274101, 267517, 266992, 268286, 271057, 253344, 272421, 266187, 245418, 248843, 276067, 270205, 255992, 252093, 258086, 270007, 267133, 256584, 274018, 263259, 261238, 266192, 269650, 257371, 249152, 257372, 251108, 262670, 248128, 257908, 272167, 251402, 245885, 262774, 268015, 258613, 249703, 266251,…	4485	848	13741	1.06943	0.957059	0.270061	56.5096
GOTERM_BP_ALL	GO:0034645~cellular macromolecule biosynthetic process	17	0.183784	0.00204423	260290, 271741, 248234, 254561, 246919, 272739, 249683, 247959, 269009, 264597, 251744, 252496, 257937, 273001, 270716, 265069, 273141	46	42	224	1.97101	0.5104	0.5104	2.75875
GOTERM_BP_ALL	GO:0009059~macromolecule biosynthetic process	17	0.183784	0.00204423	260290, 271741, 248234, 254561, 246919, 272739, 249683, 247959, 269009, 264597, 251744, 252496, 257937, 273001, 270716, 265069, 273141	46	42	224	1.97101	0.5104	0.5104	2.75875
GOTERM_BP_ALL	GO:0010467~gene expression	17	0.183784	0.00494594	260290, 271741, 248234, 254561, 246919, 272739, 249683, 247959, 269009, 264597, 251744, 252496, 257937, 273001, 270716, 265069, 273141	46	45	224	1.83961	0.822789	0.579036	6.55373
GOTERM_BP_ALL	GO:0044249~cellular biosynthetic process	18	0.194595	0.0196705	260290, 271741, 248234, 254561, 246919, 272739, 249683, 247959, 269009, 264597, 251744, 252496, 257937, 273001, 270716, 271090, 265069, 273141	46	55	224	1.59368	0.999025	0.900852	23.7837
GOTERM_BP_ALL	GO:0009058~biosynthetic process	18	0.194595	0.029133	260290, 271741, 248234, 254561, 246919, 272739, 249683, 247959, 269009, 264597, 251744, 252496, 257937, 273001, 270716, 271090, 265069, 273141	46	57	224	1.53776	0.999967	0.924197	33.2485
GOTERM_BP_ALL	GO:0006412~translation	11	0.118919	0.0389803	246919, 249683, 247959, 269009, 264597, 260290, 271741, 248234, 252496, 265069, 273141	46	29	224	1.84708	0.999999	0.937668	41.9325
GOTERM_BP_ALL	GO:0044260~cellular macromolecule metabolic process	21	0.227027	0.0444196	260290, 271741, 248234, 263023, 274172, 254561, 246919, 272739, 249683, 252621, 247959, 264597, 269009, 251744, 252496, 257937, 273001, 257287, 270716, 265069, 273141	46	73	224	1.40083	1	0.928844	46.2679
GOTERM_BP_ALL	GO:0043170~macromolecule metabolic process	21	0.227027	0.0601778	260290, 271741, 248234, 263023, 274172, 254561, 246919, 272739, 249683, 252621, 247959, 264597, 269009, 251744, 252496, 257937, 273001, 257287, 270716, 265069, 273141	46	75	224	1.36348	1	0.954696	57.1936
GOTERM_BP_ALL	GO:0006350~transcription	6	0.0648649	0.0682562	272739, 251744, 257937, 273001, 270716, 254561	46	12	224	2.43478	1	0.954232	61.9589
GOTERM_BP_FAT	GO:0006412~translation	11	0.118919	0.0358653	246919, 249683, 247959, 269009, 264597, 260290, 271741, 248234, 252496, 265069, 273141	43	29	211	1.86127	0.999928	0.999928	37.9791
GOTERM_BP_FAT	GO:0006350~transcription	6	0.0648649	0.065523	272739, 251744, 257937, 273001, 270716, 254561	43	12	211	2.45349	1	0.999856	58.7837
GOTERM_CC_ALL	GO:0043228~non-membrane-bounded organelle	20	0.216216	0.00714332	260290, 256741, 271741, 248234, 266139, 251840, 272722, 259797, 246919, 249683, 252621, 247959, 264597, 269009, 247254, 252496, 249728, 256866, 265069, 273141	47	61	238	1.66027	0.576954	0.576954	7.89995
GOTERM_CC_ALL	GO:0043232~intracellular non-membrane-bounded organelle	20	0.216216	0.00714332	260290, 256741, 271741, 248234, 266139, 251840, 272722, 259797, 246919, 249683, 252621, 247959, 264597, 269009, 247254, 252496, 249728, 256866, 265069, 273141	47	61	238	1.66027	0.576954	0.576954	7.89995
GOTERM_CC_ALL	GO:0005840~ribosome	13	0.140541	0.013679	260290, 271741, 248234, 246919, 249683, 247959, 269009, 264597, 247254, 249728, 252496, 265069, 273141	47	34	238	1.93617	0.80849	0.562381	14.6244
GOTERM_CC_ALL	GO:0043229~intracellular organelle	38	0.410811	0.0618658	261238, 260290, 271741, 248234, 251840, 272722, 248479, 246919, 267242, 247959, 264597, 252496, 256866, 275857, 273001, 265069, 252498, 273141, 256741, 263668, 266139, 271275, 263023, 247141, 259797, 269160, 249683, 252621, 269009, 263055, 248214, 247254, 260636, 249728, 257937, 251417, 270716, 271090	47	167	238	1.15225	0.99953	0.922268	51.958
GOTERM_CC_ALL	GO:0030529~ribonucleoprotein complex	13	0.140541	0.0639315	260290, 271741, 248234, 246919, 249683, 247959, 269009, 264597, 247254, 249728, 252496, 265069, 273141	47	41	238	1.6056	0.999639	0.862207	53.1585
GOTERM_CC_ALL	GO:0043226~organelle	38	0.410811	0.0704127	261238, 260290, 271741, 248234, 251840, 272722, 248479, 246919, 267242, 247959, 264597, 252496, 256866, 275857, 273001, 265069, 252498, 273141, 256741, 263668, 266139, 271275, 263023, 247141, 259797, 269160, 249683, 252621, 269009, 263055, 248214, 247254, 260636, 249728, 257937, 251417, 270716, 271090	47	168	238	1.14539	0.999843	0.826634	56.7493
GOTERM_CC_ALL	GO:0032991~macromolecular complex	26	0.281081	0.0825145	260290, 271741, 248234, 251840, 272478, 246919, 247959, 267242, 264597, 252496, 256866, 265069, 273141, 272038, 256741, 266139, 263023, 249683, 272739, 269009, 248214, 247254, 249728, 270716, 271090, 266160	47	105	238	1.2539	0.999967	0.821358	62.7896
GOTERM_CC_ALL	GO:0044456~synapse part	4	0.0432432	0.0881973	272856, 260636, 247141, 252498	47	6	238	3.37589	0.999985	0.794607	65.3511
GOTERM_CC_ALL	GO:0045202~synapse	4	0.0432432	0.0881973	272856, 260636, 247141, 252498	47	6	238	3.37589	0.999985	0.794607	65.3511
GOTERM_CC_FAT	GO:0043232~intracellular non-membrane-bounded organelle	20	0.216216	0.00929779	260290, 256741, 271741, 248234, 266139, 251840, 272722, 259797, 246919, 249683, 252621, 247959, 264597, 269009, 247254, 252496, 249728, 256866, 265069, 273141	42	61	205	1.60031	0.614344	0.614344	9.88365
GOTERM_CC_FAT	GO:0043228~non-membrane-bounded organelle	20	0.216216	0.00929779	260290, 256741, 271741, 248234, 266139, 251840, 272722, 259797, 246919, 249683, 252621, 247959, 264597, 269009, 247254, 252496, 249728, 256866, 265069, 273141	42	61	205	1.60031	0.614344	0.614344	9.88365
GOTERM_CC_FAT	GO:0005840~ribosome	13	0.140541	0.0170323	260290, 271741, 248234, 246919, 249683, 247959, 269009, 264597, 247254, 249728, 252496, 265069, 273141	42	34	205	1.86625	0.826618	0.583609	17.4187
GOTERM_CC_FAT	GO:0030529~ribonucleoprotein complex	13	0.140541	0.0779912	260290, 271741, 248234, 246919, 249683, 247959, 269009, 264597, 247254, 249728, 252496, 265069, 273141	42	41	205	1.54762	0.999747	0.93676	59.5309
GOTERM_CC_FAT	GO:0044456~synapse part	4	0.0432432	0.0958253	272856, 260636, 247141, 252498	42	6	205	3.25397	0.999966	0.923364	67.4448
GOTERM_CC_FAT	GO:0045202~synapse	4	0.0432432	0.0958253	272856, 260636, 247141, 252498	42	6	205	3.25397	0.999966	0.923364	67.4448
GOTERM_MF_ALL	GO:0003735~structural constituent of ribosome	11	0.118919	0.0342765	246919, 249683, 247959, 269009, 264597, 260290, 271741, 248234, 252496, 265069, 273141	56	28	271	1.90115	0.990982	0.990982	33.5617
GOTERM_MF_ALL	GO:0005198~structural molecule activity	12	0.12973	0.0443421	246919, 249683, 247959, 269009, 264597, 260290, 271741, 248234, 252496, 258661, 265069, 273141	56	33	271	1.75974	0.997808	0.953182	41.2414
GOTERM_MF_FAT	GO:0003735~structural constituent of ribosome	11	0.118919	0.0265013	246919, 249683, 247959, 269009, 264597, 260290, 271741, 248234, 252496, 265069, 273141	48	28	239	1.9561	0.940404	0.940404	25.9812
GOTERM_MF_FAT	GO:0005198~structural molecule activity	12	0.12973	0.0339038	246919, 249683, 247959, 269009, 264597, 260290, 271741, 248234, 252496, 258661, 265069, 273141	48	33	239	1.81061	0.973261	0.836481	32.0469
KEGG_PATHWAY	tgu02010:ABC transporters	18	0.194595	0.00150162	276391, 270269, 253637, 252385, 270550, 259041, 266822, 250002, 263756, 246444, 255355, 266713, 247965, 246835, 265186, 274018, 246656, 275756	1065	24	2731	1.92324	0.188509	0.188509	1.75528
KEGG_PATHWAY	tgu04270:Vascular smooth muscle contraction	40	0.432432	0.00415482	247826, 250273, 248271, 254621, 259353, 270210, 264862, 251943, 264911, 269766, 269994, 264298, 252954, 255512, 247938, 252250, 245959, 272324, 269244, 253849, 264756, 258969, 269086, 247331, 246472, 274470, 266017, 260159, 272908, 270636, 253661, 263881, 259092, 265107, 251253, 269581, 258267, 260834, 268271, 276170	1065	71	2731	1.44469	0.439386	0.251258	4.78789
KEGG_PATHWAY	tgu04510:Focal adhesion	67	0.724324	0.00539303	247826, 253391, 274578, 266956, 273195, 247074, 248767, 253474, 261219, 268945, 267619, 252250, 249202, 266992, 257897, 247717, 256199, 251508, 254674, 272758, 267229, 266036, 260530, 274321, 260079, 250360, 275863, 261499, 268271, 260535, 250836, 258799, 272453, 248271, 266192, 251943, 246315, 249109, 263400, 268969, 266504, 251444, 253829, 271787, 267101, 262944, 258056, 246662, 273962, 261970,…	1065	132	2731	1.30159	0.528417	0.22163	6.17365
KEGG_PATHWAY	tgu04512:ECM-receptor interaction	28	0.302703	0.0151909	258799, 272453, 266956, 247074, 273245, 261219, 246315, 249202, 250645, 268969, 257897, 258056, 262944, 267101, 256199, 274389, 273962, 251508, 265159, 248246, 245707, 266036, 261934, 269301, 275863, 268676, 260535, 273298	1065	49	2731	1.46533	0.880894	0.412533	16.5052
KEGG_PATHWAY	tgu04070:Phosphatidylinositol signaling system	27	0.291892	0.0222859	263463, 248919, 248271, 254621, 258958, 248156, 272324, 253849, 261445, 271846, 275264, 269595, 273217, 264165, 261428, 267889, 266017, 269982, 270636, 257173, 251732, 269295, 269581, 270437, 258267, 256308, 258458	1065	48	2731	1.44243	0.956404	0.465571	23.3248
KEGG_PATHWAY	tgu00380:Tryptophan metabolism	19	0.205405	0.0235732	252840, 248591, 260129, 267920, 270395, 252967, 247707, 248479, 273206, 270570, 262569, 266678, 262165, 262189, 275428, 262993, 245663, 265699, 248053	1065	31	2731	1.57168	0.963699	0.424578	24.506
KEGG_PATHWAY	tgu00770:Pantothenate and CoA biosynthesis	10	0.108108	0.0264943	272182, 266507, 261597, 254052, 272567, 251524, 256061, 251276, 261154, 267779	1065	13	2731	1.97255	0.976064	0.413273	27.1249
KEGG_PATHWAY	tgu04912:GnRH signaling pathway	33	0.356757	0.0357195	264532, 259353, 254621, 274578, 249152, 258735, 264911, 252954, 255512, 272324, 246104, 253849, 269244, 252617, 253829, 246662, 258969, 269086, 248262, 246472, 256458, 266017, 260159, 270636, 274321, 263881, 253661, 253150, 265107, 251253, 269581, 260834, 263275	1065	63	2731	1.34321	0.993628	0.468462	34.8596
KEGG_PATHWAY	tgu00512:O-Glycan biosynthesis	13	0.140541	0.0456429	268168, 269827, 252218, 261097, 247849, 258822, 266121, 273258, 252944, 272682, 262260, 255022, 246540	1065	20	2731	1.66681	0.998487	0.513989	42.3353
KEGG_PATHWAY	tgu00970:Aminoacyl-tRNA biosynthesis	18	0.194595	0.0522366	266765, 254284, 247707, 248205, 256620, 255398, 260310, 266678, 257142, 264765, 261285, 263319, 270532, 251460, 276032, 267954, 259117, 275742	1065	31	2731	1.48896	0.999423	0.525617	46.8592
KEGG_PATHWAY	tgu04120:Ubiquitin mediated proteolysis	46	0.497297	0.0661781	259857, 273400, 265626, 254926, 260191, 266814, 249481, 252510, 267990, 254804, 265328, 260646, 258639, 259286, 262776, 251167, 256667, 274975, 252129, 266716, 266463, 254987, 250839, 267788, 267652, 262939, 245999, 274385, 272464, 257710, 248187, 276316, 253486, 252621, 274196, 260079, 248739, 267367, 257865, 273300, 271719, 250243, 245963, 261499, 248436, 256328	1065	96	2731	1.22874	0.999926	0.579035	55.3741
KEGG_PATHWAY	tgu04710:Circadian rhythm	8	0.0864865	0.0867156	261353, 269398, 263272, 250994, 271036, 267085, 260902, 253134	1065	11	2731	1.86496	0.999997	0.650307	65.662
SP_PIR_KEYWORDS	ribosomal protein	13	0.140541	0.0454711	260290, 271741, 248234, 246919, 249683, 247959, 269009, 264597, 247254, 249728, 252496, 265069, 273141	47	33	198	1.65957	0.955754	0.955754	37.9544
