# Supplementary material for: A Multi-Platform Draft de novo Genome Assembly and Comparative Analysis for the Scarlet Macaw (Ara macao)
Source: PLoS One. 2013 May 8;8(5):e62415. doi: 10.1371/journal.pone.0062415 (PMC3648530; doi:10.1371/journal.pone.0062415)
Supplement: Table S15 — Summary of conserved outlier quality control analysis. (XLSX) [file pone.0062415.s016.xlsx]

## Sheet: ConservedOutliersFromChickQC
Table S15: SMAC contigs	classified as conserved outliers were aligned	to chicken with no Evalue	bound.	Thereafter	we	recalculated	the	composite	variable	via	summation			Legend	Definition/Descriptions
Query 1	Hit/Subject Chromosome	%ID	AlignLength	Mismatches	Gaps	q-start	q-end	hit-start	hit-end	evalue	bitscore			NewCorrectedForAL	New QC calculation for the composite variable based on no Evalue bound and the summation of hits across the majority of the contig's length
s_1_1_contig62050	gi|358485505|ref|NC_006094.3|	81.97	21040	2874	230	5799	26446	14698990	14719502	0	20640			TopEvalCorrectedForAL	Original value of the composite variable constructed for alignment data corresponding to only the Top Evalue Hit
s_1_1_contig62050	gi|358485505|ref|NC_006094.3|	81.97	1542	273	3	3094	4631	14695928	14697468	0	1519
s_1_1_contig62050	gi|358485505|ref|NC_006094.3|	70.85	2943	577	75	25	2844	14692835	14695619	0	1355
s_1_1_contig62050	gi|358485505|ref|NC_006094.3|	75.27	1108	197	20	4636	5723	14697935	14698985	0	742
Sum Matches bp		Sum AlignLength-->	26633
17246.5		NewCorrectedForAL	3.02122e-05
1263.98		TopEvalCorrectedForAL	3.89591e-05
2085.12		Contig Size	26473
833.992
21429.6
21430	Rounded
Query 2	Hit/Subject Chromosome	%ID	AlignLength	Mismatches	Gaps	q-start	q-end	hit-start	hit-end	evalue	bitscore
s_1_1_contig70881	NC_001323_MT	78.17	15563	3318	289	75	15570	1235	16775	0	12510
Only one good match		Sum AlignLength-->	15563
		NewCorrectedForAL	NA
		TopEvalCorrectedForAL	5.02281e-05
		Contig Size	17536
Query 3	Hit/Subject Chromosome	%ID	AlignLength	Mismatches	Gaps	q-start	q-end	hit-start	hit-end	evalue	bitscore
s_1_1_contig64025	gi|358485500|ref|NC_006099.3|	78.01	15411	2476	280	28111	43054	13034158	13049122	0	12070
s_1_1_contig64025	gi|358485500|ref|NC_006099.3|	78.62	3794	600	61	19080	22785	13026443	13030113	0	3101
s_1_1_contig64025	gi|358485500|ref|NC_006099.3|	81.7	2946	424	45	32	2917	13008229	13011119	0	2783
s_1_1_contig64025	gi|358485500|ref|NC_006099.3|	75.14	3327	557	58	10649	13836	13017903	13021098	0	2253
s_1_1_contig64025	gi|358485500|ref|NC_006099.3|	77.86	2692	462	37	5107	7736	13012592	13015211	0	2122
s_1_1_contig64025	gi|358485500|ref|NC_006099.3|	74.97	3268	609	66	15797	18955	13023248	13026415	0	2096
s_1_1_contig64025	gi|358485500|ref|NC_006099.3|	73.73	3411	589	68	22872	26134	13030112	13033363	0	2082
s_1_1_contig64025	gi|358485500|ref|NC_006099.3|	73.17	1964	378	38	8065	9968	13015438	13017312	0	1130
s_1_1_contig64025	gi|358485500|ref|NC_006099.3|	80.86	1134	158	14	14574	15664	13022073	13023190	0	1058
s_1_1_contig64025	gi|358485500|ref|NC_006099.3|	89.81	589	59	1	13846	14433	13021265	13021853	0	789
s_1_1_contig64025	gi|358485500|ref|NC_006099.3|	74.03	932	189	14	45614	46529	13049951	13050845	5e-160	574
s_1_1_contig64025	gi|358485500|ref|NC_006099.3|	73.86	700	164	8	44488	45170	13049159	13049856	2e-113	419
s_1_1_contig64025	gi|358485500|ref|NC_006099.3|	73.41	504	100	15	4422	4912	13012107	13012589	9e-68	268
s_1_1_contig64025	gi|358485500|ref|NC_006099.3|	69.11	518	110	11	3661	4160	13011344	13011829	7e-50	208
s_1_1_contig64025	gi|358485500|ref|NC_006099.3|	73.87	199	40	6	9973	10170	13017707	13017894	5e-20	109
s_1_1_contig64025	gi|358485500|ref|NC_006099.3|	72.33	159	39	3	2985	3139	13011124	13011281	3e-11	80.6
s_1_1_contig64025	gi|358485500|ref|NC_006099.3|	70.8	113	30	1	14437	14546	13021961	13022073	0.004	53.6
s_1_1_contig64025	gi|358485500|ref|NC_006099.3|	77.11	83	19	0	7736	7818	13428017	13427935	2e-06	64.4
s_1_1_contig64025	gi|358485500|ref|NC_006099.3|	86.54	52	7	0	46662	46713	13050979	13051030	7e-06	62.6
Sum Matches bp		Sum AlignLength-->	41795
12022.1		NewCorrectedForAL	1.84575e-05
2982.84		TopEvalCorrectedForAL	5.06197e-05
2406.88		Contig Size	46872
2499.91
2095.99
2450.02
2514.93
1437.06
916.952
528.981
689.96
517.02
369.986
357.99
147.001
115.005
80.004
63.0013	Minor overlap removed
45.0008
32240.7
32242	Rounded
Query 4	Hit/Subject Chromosome	%ID	AlignLength	Mismatches	Gaps	q-start	q-end	hit-start	hit-end	evalue	bitscore
s_1_1_contig72877	gi|358485507|ref|NC_006092.3|	76.12	14384	2488	265	2682	16629	13381258	13367386	0	10110
s_1_1_contig72877	gi|358485507|ref|NC_006092.3|	81	2426	347	41	83	2463	13383847	13381491	0	2215
Sum Matches bp		Sum AlignLength-->	16810
10949.1		NewCorrectedForAL	4.5701e-05
1965.06		TopEvalCorrectedForAL	5.29199e-05
12914.2		Contig Size	16629
12914	Rounded
Query 5	Hit/Subject Chromosome	%ID	AlignLength	Mismatches	Gaps	q-start	q-end	hit-start	hit-end	evalue	bitscore
s_1_1_contig66891	gi|358485499|ref|NC_006100.3|	72.84	13521	2555	307	552	13477	8469518	8456520	0	7452
s_1_1_contig66891	gi|358485499|ref|NC_006100.3|	87.8	41	5	0	13558	13598	3640210	3640170	0.004	51.8
Sum Matches bp		Sum AlignLength-->	13562
9848.7		NewCorrectedForAL	5.37439e-05
35.998		TopEvalCorrectedForAL	5.38718e-05
9884.69		Contig Size	13598
9885	Rounded
Query 6	Hit/Subject Chromosome	%ID	AlignLength	Mismatches	Gaps	q-start	q-end	hit-start	hit-end	evalue	bitscore
s_1_1_contig69396	gi|358485510|ref|NC_006089.3|	74.72	13609	2513	245	1327	14485	135103391	135090261	0	8762
s_1_1_contig69396	gi|358485510|ref|NC_006089.3|	88.23	1079	96	7	16332	17402	135087008	135085953	0	1370
s_1_1_contig69396	gi|358485510|ref|NC_006089.3|	73.53	1806	365	32	14567	16335	135090267	135088538	0	1059
s_1_1_contig69396	gi|358485510|ref|NC_006089.3|	78.89	957	148	15	1	931	135104770	135103842	0	796
s_1_1_contig69396	gi|358485510|ref|NC_006089.3|	80.82	803	93	13	21295	22085	135083202	135082449	0	751
s_1_1_contig69396	gi|358485510|ref|NC_006089.3|	79.4	864	137	12	19199	20048	135084567	135083731	0	738
s_1_1_contig69396	gi|358485510|ref|NC_006089.3|	70.46	1520	290	30	17578	19074	135085948	135084565	0	726
s_1_1_contig69396	gi|358485510|ref|NC_006089.3|	81.69	284	39	2	23407	23677	89926605	89926322	8e-72	280
s_1_1_contig69396	gi|358485510|ref|NC_006089.3|	71.38	552	112	12	22379	22901	135082224	135081690	4e-69	271
s_1_1_contig69396	gi|358485510|ref|NC_006089.3|	71.33	558	127	13	20615	21159	68970730	68970193	9e-65	257
Sum Matches bp		Sum AlignLength-->	22028
10168.6		NewCorrectedForAL	3.42722e-05
952.002		TopEvalCorrectedForAL	5.49048e-05
1323.95	Minor overlap removed	Contig Size	24908
754.977
648.985
686.016
1070.99
232
394.018
398.021
16629.6
16630	Rounded
Query 7	Hit/Subject Chromosome	%ID	AlignLength	Mismatches	Gaps	q-start	q-end	hit-start	hit-end	evalue	bitscore
s_1_1_contig104542	gi|358485510|ref|NC_006089.3|	73.62	13155	2371	278	55	12714	38162048	38149498	0	7817
s_1_1_contig104542	gi|358485510|ref|NC_006089.3|	73.23	1076	236	11	15090	16139	38148143	38147094	5e-180	639
s_1_1_contig104542	gi|358485510|ref|NC_006089.3|	78.64	543	81	6	12743	13251	38149243	38148702	3e-126	461
s_1_1_contig104542	gi|358485510|ref|NC_006089.3|	69.36	346	76	5	13759	14103	38148459	38148143	6e-33	150
Sum Matches bp		Sum AlignLength-->	15120
9684.71		NewCorrectedForAL	4.87283e-05
787.955		TopEvalCorrectedForAL	5.59635e-05
427.015		Contig Size	16166
239.986
11139.7
11140	Rounded
Query 8	Hit/Subject Chromosome	%ID	AlignLength	Mismatches	Gaps	q-start	q-end	hit-start	hit-end	evalue	bitscore
s_1_1_contig64793	gi|358485497|ref|NC_006102.3|	76.65	13673	2211	255	7922	21139	8485042	8471896	0	10000
s_1_1_contig64793	gi|358485497|ref|NC_006102.3|	76.43	3118	522	75	1	3013	8493757	8490748	0	2163
s_1_1_contig64793	gi|358485497|ref|NC_006102.3|	73.36	3138	630	63	24350	27396	8467955	8464933	0	1792
s_1_1_contig64793	gi|358485497|ref|NC_006102.3|	78.63	1886	256	34	31380	33215	8460994	8459206	0	1564
s_1_1_contig64793	gi|358485497|ref|NC_006102.3|	78.35	1612	269	24	29569	31148	8462878	8461315	0	1297
s_1_1_contig64793	gi|358485497|ref|NC_006102.3|	70.72	2534	517	61	3311	5721	8489208	8486777	0	1153
s_1_1_contig64793	gi|358485497|ref|NC_006102.3|	75.31	1596	284	25	27428	28938	8464785	8463215	0	1088
s_1_1_contig64793	gi|358485497|ref|NC_006102.3|	71.67	1659	351	40	6097	7708	8486670	8485084	0	800
s_1_1_contig64793	gi|358485497|ref|NC_006102.3|	71.96	1423	272	25	22905	24251	8469322	8467951	0	769
s_1_1_contig64793	gi|358485497|ref|NC_006102.3|	78.83	685	104	12	21408	22090	8471761	8471116	2e-157	565
s_1_1_contig64793	gi|358485497|ref|NC_006102.3|	85.15	229	28	2	22661	22889	8471045	8470823	1e-64	257
s_1_1_contig64793	gi|358485497|ref|NC_006102.3|	75.16	157	26	4	29398	29554	8463198	8463055	6e-18	102
Sum Matches bp		Sum AlignLength-->	31710
10480.4		NewCorrectedForAL	2.38393e-05
2383.09		TopEvalCorrectedForAL	5.60594e-05
2302.04		Contig Size	33268
1482.96
1263
1792.04
1201.95
1189.01
1023.99
539.986
194.994
118.001
23971.4
23971	Rounded
Query 9	Hit/Subject Chromosome	%ID	AlignLength	Mismatches	Gaps	q-start	q-end	hit-start	hit-end	evalue	bitscore
s_1_1_contig69895	gi|358485510|ref|NC_006089.3|	75.41	13343	2378	226	404	13314	112792882	112780011	0	9066
s_1_1_contig69895	gi|358485510|ref|NC_006089.3|	79.42	2318	371	30	13798	16059	112780013	112777746	0	1990
s_1_1_contig69895	gi|358485510|ref|NC_006089.3|	74.31	109	20	2	45	153	112793125	112793025	2e-08	69.8
Sum Matches bp		Sum AlignLength-->	15770
10062		NewCorrectedForAL	4.81879e-05
1840.96		TopEvalCorrectedForAL	5.65165e-05
80.9979		Contig Size	16152
11983.9
11984	Rounded
Query 10	Hit/Subject Chromosome	%ID	AlignLength	Mismatches	Gaps	q-start	q-end	hit-start	hit-end	evalue	bitscore
s_1_1_contig57264	gi|358485509|ref|NC_006090.3|	75.58	13364	2430	231	11799	24774	74383848	74396765	0	9095
s_1_1_contig57264	gi|358485509|ref|NC_006090.3|	76.75	1940	314	26	1866	3705	74369765	74371667	0	1472
s_1_1_contig57264	gi|358485509|ref|NC_006090.3|	80	1230	204	11	5172	6369	74375538	74376757	0	1097
s_1_1_contig57264	gi|358485509|ref|NC_006090.3|	72.21	1486	278	29	7705	9110	74379253	74380683	0	809
s_1_1_contig57264	gi|358485509|ref|NC_006090.3|	74.83	1156	219	28	6579	7698	74378026	74379145	0	711
s_1_1_contig57264	gi|358485509|ref|NC_006090.3|	69.65	1387	260	30	10252	11502	74382278	74383639	3e-172	614
s_1_1_contig57264	gi|358485509|ref|NC_006090.3|	75.54	654	103	15	67	691	74367472	74368097	1e-120	443
s_1_1_contig57264	gi|358485509|ref|NC_006090.3|	78.31	544	103	9	4566	5106	74374858	74375389	1e-114	423
s_1_1_contig57264	gi|358485509|ref|NC_006090.3|	67.43	1010	204	25	9329	10257	74381205	74382170	3e-89	338
s_1_1_contig57264	gi|358485509|ref|NC_006090.3|	70.52	743	175	14	3737	4452	74373936	74374661	2e-86	329
s_1_1_contig57264	gi|358485509|ref|NC_006090.3|	72.99	548	108	8	1290	1835	74369031	74369540	2e-84	322
Sum Matches bp		Sum AlignLength-->	24056
10100.5		NewCorrectedForAL	3.11099e-05
1488.95		TopEvalCorrectedForAL	5.65549e-05
984		Contig Size	24800
1073.04
865.035
966.046
494.032
426.006
675.043	Minor Overlap Removed
523.964
399.985
17996.6
18003	Rounded
Query 11	Hit/Subject Chromosome	%ID	AlignLength	Mismatches	Gaps	q-start	q-end	hit-start	hit-end	evalue	bitscore
s_1_1_contig82575	gi|358485511|ref|NC_006088.3|	70.35	12285	2464	304	3213	14913	43204969	43193280	0	5424
s_1_1_contig82575	gi|358485511|ref|NC_006088.3|	75.51	1605	263	35	20498	22050	43188220	43186694	0	1083
s_1_1_contig82575	gi|358485511|ref|NC_006088.3|	73.44	1495	297	30	1516	2976	43206853	43205425	0	861
s_1_1_contig82575	gi|358485511|ref|NC_006088.3|	74.84	1089	187	23	75	1124	43209063	43208023	0	704
s_1_1_contig82575	gi|358485511|ref|NC_006088.3|	75.14	740	125	13	18929	19638	43189717	43189007	4e-138	500
s_1_1_contig82575	gi|358485511|ref|NC_006088.3|	68.36	1375	343	33	16336	17680	43192081	43190769	5e-124	453
s_1_1_contig82575	gi|358485511|ref|NC_006088.3|	79.72	424	79	5	15550	15968	43192785	43192364	3e-96	361
s_1_1_contig82575	gi|358485511|ref|NC_006088.3|	74.09	301	67	6	20059	20352	43188608	43188312	7e-40	174
s_1_1_contig82575	gi|358485511|ref|NC_006088.3|	73.96	265	61	4	15023	15279	43193247	43192983	2e-34	156
s_1_1_contig82575	gi|358485511|ref|NC_006088.3|	81.82	88	14	1	17887	17972	43190466	43190379	1e-12	84.2
s_1_1_contig82575	gi|358485511|ref|NC_006088.3|	65.62	381	76	14	1111	1463	43207506	43207153	1e-12	84.2
Sum Matches bp		Sum AlignLength-->	20034
8642.5		NewCorrectedForAL	3.56985e-05
1211.94		TopEvalCorrectedForAL	5.7265e-05
1097.93		Contig Size	22057
815.008
556.036
939.95
338.013
223.011
195.994
72.0016
236.012	Overlap Removed
14328.4
14328	Rounded
Query 12	Hit/Subject Chromosome	%ID	AlignLength	Mismatches	Gaps	q-start	q-end	hit-start	hit-end	evalue	bitscore
s_1_1_contig60853	gi|358485505|ref|NC_006094.3|	72.31	12538	2296	307	2391	14301	25625557	25637545	0	6634
s_1_1_contig60853	gi|358485505|ref|NC_006094.3|	66.47	1852	374	56	14382	16102	25637761	25639496	2e-141	511
s_1_1_contig60853	gi|358485505|ref|NC_006094.3|	79.03	372	49	7	16	380	25624216	25624565	2e-82	315
s_1_1_contig60853	gi|358485505|ref|NC_006094.3|	75.23	440	82	12	1363	1787	25625122	25625549	7e-70	273
Sum Matches bp		Sum AlignLength-->	15202
9066.23		NewCorrectedForAL	4.72608e-05
1231.02		TopEvalCorrectedForAL	5.76727e-05
293.992		Contig Size	16141
331.012
10922.3
10922	Rounded
Query 13	Hit/Subject Chromosome	%ID	AlignLength	Mismatches	Gaps	q-start	q-end	hit-start	hit-end	evalue	bitscore
s_1_1_contig66256	gi|358485509|ref|NC_006090.3|	78.57	13590	2088	220	22	13189	30013512	30026698	0	11130
s_1_1_contig66256	gi|358485509|ref|NC_006090.3|	72.76	536	79	12	13754	14284	30027354	30027827	2e-82	315
Sum Matches bp		Sum AlignLength-->	14126
10677.7		NewCorrectedForAL	5.54665e-05
389.994		TopEvalCorrectedForAL	5.78146e-05
11067.7		Contig Size
11068	Rounded
Query 14	Hit/Subject Chromosome	%ID	AlignLength	Mismatches	Gaps	q-start	q-end	hit-start	hit-end	evalue	bitscore
s_1_1_contig87385	gi|358485505|ref|NC_006094.3|	75.23	12885	2163	260	1	12354	11408642	11421028	0	8601
s_1_1_contig87385	gi|358485505|ref|NC_006094.3|	76.36	2504	406	56	12453	14843	11421073	11423503	0	1763
Sum Matches bp		Sum AlignLength-->	15389
9693.39		NewCorrectedForAL	4.90032e-05
1912.05		TopEvalCorrectedForAL	5.83857e-05
11605.4		Contig Size	15311
11605	Rounded
Query 15	Hit/Subject Chromosome	%ID	AlignLength	Mismatches	Gaps	q-start	q-end	hit-start	hit-end	evalue	bitscore
s_1_1_contig107143	gi|358485510|ref|NC_006089.3|	77.55	13234	2175	220	24	12849	116682318	116695163	0	10200
Hit covers contig		Sum AlignLength-->	13234
		NewCorrectedForAL	NA
		TopEvalCorrectedForAL	5.85991e-05
		Contig Size	12849
Query 16	Hit/Subject Chromosome	%ID	AlignLength	Mismatches	Gaps	q-start	q-end	hit-start	hit-end	evalue	bitscore
s_1_1_contig75998	gi|358485511|ref|NC_006088.3|	70.92	12106	2414	264	530	12210	122256847	122245424	0	5766
s_1_1_contig75998	gi|358485511|ref|NC_006088.3|	70.74	270	59	4	176	442	122258529	122258277	4e-27	131
Sum Matches bp		Sum AlignLength-->	12376
8585.58		NewCorrectedForAL	5.73041e-05
190.998		TopEvalCorrectedForAL	5.85825e-05
8776.57		Contig Size	12214
8777	Rounded
Query 17	Hit/Subject Chromosome	%ID	AlignLength	Mismatches	Gaps	q-start	q-end	hit-start	hit-end	evalue	bitscore
s_1_1_contig62662	gi|358485494|ref|NC_006105.3|	71.4	12180	2413	297	20197	32009	5896972	5885496	0	5889
s_1_1_contig62662	gi|358485494|ref|NC_006105.3|	74.98	7561	1272	151	3478	10679	5912897	5905598	0	4983
s_1_1_contig62662	gi|358485494|ref|NC_006105.3|	76.71	3267	546	59	10831	13972	5905133	5901957	0	2388
s_1_1_contig62662	gi|358485494|ref|NC_006105.3|	71.97	1837	313	47	15643	17419	5901007	5899313	0	962
s_1_1_contig62662	gi|358485494|ref|NC_006105.3|	85.26	719	89	7	34664	35373	5882691	5881981	0	803
s_1_1_contig62662	gi|358485494|ref|NC_006105.3|	69.85	1781	374	46	17987	19705	5898749	5897070	0	731
s_1_1_contig62662	gi|358485494|ref|NC_006105.3|	74.09	984	176	18	33629	34561	5884032	5883077	1e-172	616
s_1_1_contig62662	gi|358485494|ref|NC_006105.3|	77.38	672	122	12	14114	14782	5901881	5901237	7e-138	500
s_1_1_contig62662	gi|358485494|ref|NC_006105.3|	66.88	924	223	26	1889	2796	5914185	5913329	8e-61	244
s_1_1_contig62662	gi|358485494|ref|NC_006105.3|	83.26	215	23	5	36524	36733	5881130	5880924	4e-52	215
s_1_1_contig62662	gi|358485494|ref|NC_006105.3|	64.27	1293	293	48	32204	33422	5885378	5884181	7e-43	185
Sum Matches bp		Sum AlignLength-->	31433
8696.52		NewCorrectedForAL	2.32057e-05
5669.24		TopEvalCorrectedForAL	5.86207e-05
2506.12		Contig Size	36784
1322.09
613.019
1244.03
729.046
519.994
617.971
179.009
831.011
22928
22928	Rounded
Query 18	Hit/Subject Chromosome	%ID	AlignLength	Mismatches	Gaps	q-start	q-end	hit-start	hit-end	evalue	bitscore
s_1_1_contig69742	gi|358485509|ref|NC_006090.3|	72.97	12403	2304	230	812	12792	30379986	30368211	0	7160
s_1_1_contig69742	gi|358485509|ref|NC_006090.3|	77.68	439	86	8	24	453	59800446	59800881	1e-85	325
Sum Matches bp		Sum AlignLength-->	12842
9050.47		NewCorrectedForAL	5.69438e-05
341.015		TopEvalCorrectedForAL	5.88325e-05
9391.48		Contig Size	12799
9391	Rounded
Query 19	Hit/Subject Chromosome	%ID	AlignLength	Mismatches	Gaps	q-start	q-end	hit-start	hit-end	evalue	bitscore
s_1_1_contig69271	gi|358485504|ref|NC_006095.3|	74.2	12348	2142	273	2	11803	21905177	21917026	0	7615
s_1_1_contig69271	gi|358485504|ref|NC_006095.3|	80.45	3612	496	58	13820	17339	21918940	21922433	0	3259
s_1_1_contig69271	gi|358485504|ref|NC_006095.3|	71.76	1112	203	22	12516	13583	21917647	21918691	2e-165	590
s_1_1_contig69271	gi|358485504|ref|NC_006095.3|	76.04	96	20	1	12366	12461	21917392	21917484	6e-08	68
s_1_1_contig69271	gi|358485504|ref|NC_006095.3|	93.94	33	2	0	12233	12265	9003993	9004025	0.005	51.8
Sum Matches bp		Sum AlignLength-->	17201
9162.22		NewCorrectedForAL	4.38362e-05
2905.85		TopEvalCorrectedForAL	6.00907e-05
797.971		Contig Size	17404
72.9984
31.0002
12970
12970	Rounded
Query 20	Hit/Subject Chromosome	%ID	AlignLength	Mismatches	Gaps	q-start	q-end	hit-start	hit-end	evalue	bitscore
s_1_1_contig97440	gi|358485505|ref|NC_006094.3|	80.73	13345	1939	182	7	13039	12308136	12295113	0	12220
Hit Covers Contig		Sum AlignLength-->	13345
		NewCorrectedForAL	NA
		TopEvalCorrectedForAL	6.04946e-05
		Contig Size	13063
Query 21	Hit/Subject Chromosome	%ID	AlignLength	Mismatches	Gaps	q-start	q-end	hit-start	hit-end	evalue	bitscore
s_1_1_contig112754	gi|358485493|ref|NC_006106.3|	79.83	13119	1873	190	6042	18715	3867668	3854878	0	11570
s_1_1_contig112754	gi|358485493|ref|NC_006106.3|	81.26	4220	551	61	907	4998	3872843	3868736	0	3986
s_1_1_contig112754	gi|358485493|ref|NC_006106.3|	76.81	858	144	16	5186	6018	3868577	3867750	1e-176	628
s_1_1_contig112754	gi|358485493|ref|NC_006106.3|	75.1	747	159	12	65	796	3873801	3873067	1e-131	479
Sum Matches bp		Sum AlignLength-->	18944
10472.9		NewCorrectedForAL	4.21372e-05
3429.17		TopEvalCorrectedForAL	6.08507e-05
659.03		Contig Size	19037
560.997
15122.1
15122	Rounded
Query 22	Hit/Subject Chromosome	%ID	AlignLength	Mismatches	Gaps	q-start	q-end	hit-start	hit-end	evalue	bitscore
s_1_1_contig100633	gi|358485511|ref|NC_006088.3|	87.95	14435	1418	80	1379	15679	176886703	176900949	0	18120
s_1_1_contig100633	gi|358485511|ref|NC_006088.3|	75.15	495	89	14	460	928	176886112	176886598	1e-79	306
s_1_1_contig100633	gi|358485511|ref|NC_006088.3|	69.85	325	61	14	15942	16250	176901244	176901547	4e-22	114
Sum Matches bp		Sum AlignLength-->	15255
12695.6		NewCorrectedForAL	5.713e-05
371.993		TopEvalCorrectedForAL	6.09283e-05
227.012		Contig Size	16288
13294.6
13295	Rounded
Query 23	Hit/Subject Chromosome	%ID	AlignLength	Mismatches	Gaps	q-start	q-end	hit-start	hit-end	evalue	bitscore
s_1_1_contig71766	gi|358485510|ref|NC_006089.3|	78.91	12906	2113	178	1278	13875	35531021	35518417	0	10750
s_1_1_contig71766	gi|358485510|ref|NC_006089.3|	75.36	1234	255	20	1	1218	35532464	35531264	0	809
Sum Matches bp		Sum AlignLength-->	14140
10184.1		NewCorrectedForAL	5.55868e-05
929.942		TopEvalCorrectedForAL	6.11421e-05
11114.1		Contig Size	13939
11114	Rounded
Query 24	Hit/Subject Chromosome	%ID	AlignLength	Mismatches	Gaps	q-start	q-end	hit-start	hit-end	evalue	bitscore
s_1_1_contig63201	gi|358485503|ref|NC_006096.3|	70.7	11509	2334	286	11813	22856	14573787	14562852	0	5200
s_1_1_contig63201	gi|358485503|ref|NC_006096.3|	70.78	2019	434	30	1126	3110	14583222	14581326	0	987
s_1_1_contig63201	gi|358485503|ref|NC_006096.3|	72.1	1810	374	45	23699	25465	14562214	14560493	0	902
s_1_1_contig63201	gi|358485503|ref|NC_006096.3|	68.76	2500	496	79	9061	11415	14577028	14574669	0	888
s_1_1_contig63201	gi|358485503|ref|NC_006096.3|	69.32	1581	324	42	4398	5927	14580321	14578851	2e-174	621
s_1_1_contig63201	gi|358485503|ref|NC_006096.3|	68.31	1461	310	34	7519	8910	14578522	14577146	8e-148	533
s_1_1_contig63201	gi|358485503|ref|NC_006096.3|	67.1	1678	386	55	25767	27337	14560432	14558814	1e-119	439
s_1_1_contig63201	gi|358485503|ref|NC_006096.3|	79.17	504	88	5	3480	3982	14581222	14580735	3e-116	428
s_1_1_contig63201	gi|358485503|ref|NC_006096.3|	79.07	258	48	2	4149	4401	14580698	14580442	2e-53	219
s_1_1_contig63201	gi|358485503|ref|NC_006096.3|	77.72	202	43	2	577	777	14584288	14584088	8e-34	154
s_1_1_contig63201	gi|358485503|ref|NC_006096.3|	78.86	123	22	1	140	262	14584459	14584341	1e-18	104
s_1_1_contig63201	gi|358485503|ref|NC_006096.3|	72.19	151	35	5	23106	23256	14562362	14562219	1e-07	68
s_1_1_contig63201	gi|358485503|ref|NC_006096.3|	69.81	106	26	1	11510	11615	14574387	14574288	0.09	48.2
Sum Matches bp		Sum AlignLength-->	23898
8136.86		NewCorrectedForAL	2.94967e-05
1429.05		TopEvalCorrectedForAL	6.14302e-05
1305.01		Contig Size	27339
1719
1095.95
998.009
1125.94
399.017
200.001	Overlap Removed
156.994
96.9978
109.007
73.9986
16845.8
16846	Rounded
Query 25	Hit/Subject Chromosome	%ID	AlignLength	Mismatches	Gaps	q-start	q-end	hit-start	hit-end	evalue	bitscore
s_1_1_contig85582	gi|358485499|ref|NC_006100.3|	74.26	12079	2256	225	3731	15406	13349800	13361428	0	7521
s_1_1_contig85582	gi|358485499|ref|NC_006100.3|	79.5	3981	617	62	17284	21149	13363133	13367029	0	3400
s_1_1_contig85582	gi|358485499|ref|NC_006100.3|	79.64	1891	347	22	2	1870	13346352	13348226	0	1609
s_1_1_contig85582	gi|358485499|ref|NC_006100.3|	74.88	1294	210	25	22835	24052	13368238	13369492	0	859
s_1_1_contig85582	gi|358485499|ref|NC_006100.3|	74.98	1275	210	30	15625	16854	13361551	13362761	0	825
s_1_1_contig85582	gi|358485499|ref|NC_006100.3|	73.96	868	160	18	22003	22828	13367036	13367879	1e-145	526
s_1_1_contig85582	gi|358485499|ref|NC_006100.3|	84.66	326	50	0	25339	25664	13369650	13369975	8e-97	363
s_1_1_contig85582	gi|358485499|ref|NC_006100.3|	76.08	418	73	8	1906	2307	13348903	13349309	4e-75	291
Sum Matches bp		Sum AlignLength-->	22132
8969.87		NewCorrectedForAL	3.4302e-05
3164.89		TopEvalCorrectedForAL	6.14786e-05
1505.99		Contig Size	25766
968.947
955.995
641.973
275.992
318.014
16801.7
16802
Query 26	Hit/Subject Chromosome	%ID	AlignLength	Mismatches	Gaps	q-start	q-end	hit-start	hit-end	evalue	bitscore
s_1_1_contig50089	gi|358485511|ref|NC_006088.3|	77.6	12596	1973	208	16	12245	28655810	28667923	0	9824
s_1_1_contig50089	gi|358485511|ref|NC_006088.3|	85.71	35	5	0	12395	12429	63165743	63165777	6.1	41
Sum Matches bp		Sum AlignLength-->	12631
9774.5		NewCorrectedForAL	6.14508e-05
29.9985		TopEvalCorrectedForAL	6.16069e-05
9804.49		Contig Size	12548
9804	Rounded
Query 27	Hit/Subject Chromosome	%ID	AlignLength	Mismatches	Gaps	q-start	q-end	hit-start	hit-end	evalue	bitscore
s_1_1_contig64685	gi|358485499|ref|NC_006100.3|	73.75	11899	2290	237	12946	24504	11605790	11594386	0	7057
s_1_1_contig64685	gi|358485499|ref|NC_006100.3|	76.67	8271	1496	126	27342	35391	11591945	11583888	0	6038
s_1_1_contig64685	gi|358485499|ref|NC_006100.3|	72.14	1895	382	49	36121	37926	11583440	11581603	0	948
s_1_1_contig64685	gi|358485499|ref|NC_006100.3|	80	1055	185	8	26140	27177	11593028	11591983	0	939
s_1_1_contig64685	gi|358485499|ref|NC_006100.3|	74.57	999	189	12	38317	39292	11581550	11580594	0	661
s_1_1_contig64685	gi|358485499|ref|NC_006100.3|	91.4	279	24	0	11906	12184	11606818	11606540	2e-106	396
s_1_1_contig64685	gi|358485499|ref|NC_006100.3|	70.67	699	127	16	40660	41341	11578882	11578245	7e-88	334
s_1_1_contig64685	gi|358485499|ref|NC_006100.3|	82.3	305	50	2	39699	40003	11580494	11580194	4e-78	302
s_1_1_contig64685	gi|358485499|ref|NC_006100.3|	64.86	1588	365	50	4879	6342	11612291	11610773	2e-76	297
s_1_1_contig64685	gi|358485499|ref|NC_006100.3|	74.42	391	83	9	2771	3156	11612954	11612576	2e-56	230
s_1_1_contig64685	gi|358485499|ref|NC_006100.3|	85.35	157	22	1	10458	10613	11607913	11607757	4e-40	176
s_1_1_contig64685	gi|358485499|ref|NC_006100.3|	70.43	399	96	9	11247	11626	11607399	11607004	2e-37	167
s_1_1_contig64685	gi|358485499|ref|NC_006100.3|	74.31	253	44	5	2259	2509	11613357	11613124	3e-35	159
s_1_1_contig64685	gi|358485499|ref|NC_006100.3|	75.46	216	49	3	7152	7364	11610172	11609958	8e-30	141
s_1_1_contig64685	gi|358485499|ref|NC_006100.3|	73.68	247	42	8	9222	9466	11608861	11608636	1e-28	138
s_1_1_contig64685	gi|358485499|ref|NC_006100.3|	70.36	253	65	3	237	488	11614934	11614691	1e-21	114
s_1_1_contig64685	gi|358485499|ref|NC_006100.3|	73.96	192	44	3	1303	1490	11614089	11613900	4e-21	113
s_1_1_contig64685	gi|358485499|ref|NC_006100.3|	68.33	341	97	6	35542	35882	11583786	11583457	1e-20	111
s_1_1_contig64685	gi|358485499|ref|NC_006100.3|	74.52	157	39	1	42590	42746	11577438	11577283	3e-17	100
s_1_1_contig64685	gi|358485499|ref|NC_006100.3|	73.55	121	20	3	25260	25370	11594048	11593930	1e-08	71.6
Sum Matches bp		Sum AlignLength-->	29717
8775.51		NewCorrectedForAL	2.50266e-05
6341.38		TopEvalCorrectedForAL	6.198e-05
1367.05		Contig Size	43197
844
744.954
255.006
493.983
251.015
1029.98
290.982
133.999
281.016
188.004
162.994
181.99
178.011
142.003
233.005
116.996
88.9955
22100.9
22101	Rounded
Query 28	Hit/Subject Chromosome	%ID	AlignLength	Mismatches	Gaps	q-start	q-end	hit-start	hit-end	evalue	bitscore
s_1_1_contig65079	gi|358485508|ref|NC_006091.3|	77.72	12514	1984	197	1	12110	12931291	12943404	0	9835
Hit covers contig		Sum AlignLength-->	12514
		NewCorrectedForAL	NA
		TopEvalCorrectedForAL	6.21064e-05
		Contig Size	12145
Query 29	Hit/Subject Chromosome	%ID	AlignLength	Mismatches	Gaps	q-start	q-end	hit-start	hit-end	evalue	bitscore
s_1_1_contig75308	gi|358485510|ref|NC_006089.3|	71.27	11440	2281	262	3073	14061	61801033	61811917	0	5537
s_1_1_contig75308	gi|358485510|ref|NC_006089.3|	71.02	3492	720	71	24666	28093	61821939	61825202	0	1678
s_1_1_contig75308	gi|358485510|ref|NC_006089.3|	73.89	1907	347	41	28378	30215	61825286	61827110	0	1146
s_1_1_contig75308	gi|358485510|ref|NC_006089.3|	74.44	1557	262	35	16640	18168	61813946	61815394	0	978
s_1_1_contig75308	gi|358485510|ref|NC_006089.3|	69.54	1855	369	49	14185	15960	61811926	61813663	0	755
s_1_1_contig75308	gi|358485510|ref|NC_006089.3|	71.64	1449	284	37	31337	32750	61827849	61829205	0	708
s_1_1_contig75308	gi|358485510|ref|NC_006089.3|	74.61	1020	179	20	20600	21591	61817612	61818579	0	654
s_1_1_contig75308	gi|358485510|ref|NC_006089.3|	72.24	1196	234	24	23420	24565	61820502	61821649	3e-180	641
s_1_1_contig75308	gi|358485510|ref|NC_006089.3|	79.58	715	105	7	30275	30959	61827108	61827811	3e-179	637
s_1_1_contig75308	gi|358485510|ref|NC_006089.3|	81.46	615	87	11	19594	20194	61816763	61817364	4e-159	571
s_1_1_contig75308	gi|358485510|ref|NC_006089.3|	73.95	787	147	13	3	748	61798560	61799329	1e-134	489
s_1_1_contig75308	gi|358485510|ref|NC_006089.3|	66.17	1206	240	33	21850	22968	61818766	61819890	4e-89	338
s_1_1_contig75308	gi|358485510|ref|NC_006089.3|	67.46	753	147	20	18743	19432	61815834	61816551	5e-63	251
s_1_1_contig75308	gi|358485510|ref|NC_006089.3|	65.48	930	208	24	1054	1939	61799384	61800244	7e-55	224
Sum Matches bp		Sum AlignLength-->	28922
8153.29		NewCorrectedForAL	2.47716e-05
2480.02		TopEvalCorrectedForAL	6.2299e-05
1409.08		Contig Size	32753
1159.03
1289.97
1038.06
761.022
863.99
568.997
500.979
581.987
798.01
507.974
608.964
20721.4
20721	Rounded
Query 30	Hit/Subject Chromosome	%ID	AlignLength	Mismatches	Gaps	q-start	q-end	hit-start	hit-end	evalue	bitscore
s_1_1_contig63731	gi|358485502|ref|NC_006097.3|	74.05	11850	2103	229	3145	14440	11102861	11114292	0	7351
s_1_1_contig63731	gi|358485502|ref|NC_006097.3|	75.17	1470	277	29	19	1440	11100157	11101586	0	955
s_1_1_contig63731	gi|358485502|ref|NC_006097.3|	72.93	495	97	8	16753	17240	11116057	11116521	1e-73	286
s_1_1_contig63731	gi|358485502|ref|NC_006097.3|	73.71	445	89	8	2433	2854	11102292	11102731	4e-67	264
s_1_1_contig63731	gi|358485502|ref|NC_006097.3|	78.24	170	26	2	1537	1696	19800427	19800595	3e-30	141
s_1_1_contig63731	gi|358485502|ref|NC_006097.3|	83.72	86	12	2	2977	3060	11102773	11102858	2e-13	86
Sum Matches bp		Sum AlignLength-->	14516
8774.92		NewCorrectedForAL	5.11309e-05
1105		TopEvalCorrectedForAL	6.24895e-05
361.004		Contig Size	17820
328.01			16038
133.008
71.9992
10773.9
10774	Rounded
Query 31	Hit/Subject Chromosome	%ID	AlignLength	Mismatches	Gaps	q-start	q-end	hit-start	hit-end	evalue	bitscore
s_1_1_contig69843	gi|358485506|ref|NC_006093.3|	76.93	12275	1999	213	216	12166	14679322	14691087	0	9160
Hit covers contig		Sum AlignLength-->	12275
		NewCorrectedForAL	NA
		TopEvalCorrectedForAL	6.26721e-05
		Contig Size	12172
Query 32	Hit/Subject Chromosome	%ID	AlignLength	Mismatches	Gaps	q-start	q-end	hit-start	hit-end	evalue	bitscore
s_1_1_contig71343	gi|358485510|ref|NC_006089.3|	73.72	11643	2185	233	19898	31214	50781067	50792160	0	6940
s_1_1_contig71343	gi|358485510|ref|NC_006089.3|	71.04	4127	866	89	137	4167	50761612	50765505	0	1950
s_1_1_contig71343	gi|358485510|ref|NC_006089.3|	69.57	2307	476	53	9449	11682	50769388	50771541	0	960
s_1_1_contig71343	gi|358485510|ref|NC_006089.3|	68.68	2053	408	55	11792	13744	50772460	50774377	0	767
s_1_1_contig71343	gi|358485510|ref|NC_006089.3|	78.99	833	152	11	7291	8105	50767224	50768051	0	684
s_1_1_contig71343	gi|358485510|ref|NC_006089.3|	69.81	1444	313	42	14286	15700	50774465	50775814	7e-156	560
s_1_1_contig71343	gi|358485510|ref|NC_006089.3|	72.69	897	176	23	18594	19476	50779269	50780110	3e-129	471
s_1_1_contig71343	gi|358485510|ref|NC_006089.3|	70.86	985	161	30	4249	5174	50765516	50766433	5e-126	461
s_1_1_contig71343	gi|358485510|ref|NC_006089.3|	74.62	729	132	16	5843	6549	50766448	50767145	6e-125	457
s_1_1_contig71343	gi|358485510|ref|NC_006089.3|	68.89	1273	289	39	8107	9336	50768121	50769329	2e-117	432
s_1_1_contig71343	gi|358485510|ref|NC_006089.3|	67.12	736	167	17	15771	16475	50775946	50776637	5e-56	228
s_1_1_contig71343	gi|358485510|ref|NC_006089.3|	73.88	379	74	7	17422	17791	50777208	50777570	5e-56	228
s_1_1_contig71343	gi|358485510|ref|NC_006089.3|	68.39	329	68	14	18179	18486	50778098	50778411	8e-16	95.1
s_1_1_contig71343	gi|358485510|ref|NC_006089.3|	70.27	185	51	1	19719	19903	50780570	50780750	4e-13	86
s_1_1_contig71343	gi|358485510|ref|NC_006089.3|	66.06	274	45	9	16875	17141	50776754	50776986	6e-11	78.8
Sum Matches bp		Sum AlignLength-->	28188
8583.22		NewCorrectedForAL	2.55121e-05
2931.82		TopEvalCorrectedForAL	6.3317e-05
1604.98		Contig Size	31214
1410
657.987
1008.06
652.029
697.971
543.98
876.97
494.003
280.005
225.003
124	Overlap Removed
181.004
20271
20271	Rounded
Query 33	Hit/Subject Chromosome	%ID	AlignLength	Mismatches	Gaps	q-start	q-end	hit-start	hit-end	evalue	bitscore
s_1_1_contig94654	gi|358485505|ref|NC_006094.3|	68.82	10813	2122	310	938	11176	11267970	11257834	0	4028
s_1_1_contig94654	gi|358485505|ref|NC_006094.3|	66.06	2584	604	82	12807	15287	11256476	11254063	3e-163	583
s_1_1_contig94654	gi|358485505|ref|NC_006094.3|	70.45	176	39	4	11882	12057	11257183	11257021	1e-10	77
Sum Matches bp		Sum AlignLength-->	13573
7441.51		NewCorrectedForAL	5.03294e-05
1706.99		TopEvalCorrectedForAL	6.36456e-05
123.992		Contig Size	15303
9272.49
9272	Rounded
Query 34	Hit/Subject Chromosome	%ID	AlignLength	Mismatches	Gaps	q-start	q-end	hit-start	hit-end	evalue	bitscore
s_1_1_contig56943	gi|358485511|ref|NC_006088.3|	75.7	11885	2027	245	228	11679	44273372	44261916	0	8085
s_1_1_contig56943	gi|358485511|ref|NC_006088.3|	73.61	6208	1224	128	16838	22871	44257952	44251985	0	3608
s_1_1_contig56943	gi|358485511|ref|NC_006088.3|	74.78	2252	429	34	12656	14815	44261494	44259290	0	1472
s_1_1_contig56943	gi|358485511|ref|NC_006088.3|	72.89	1302	268	21	23863	25121	44251409	44250150	0	738
s_1_1_contig56943	gi|358485511|ref|NC_006088.3|	68.04	848	201	21	14966	15771	44259270	44258451	9e-71	277
s_1_1_contig56943	gi|358485511|ref|NC_006088.3|	68.95	380	75	8	16419	16798	44258478	44258142	2e-34	156
Sum Matches bp		Sum AlignLength-->	22875
8996.94		NewCorrectedForAL	3.25628e-05
4569.71		TopEvalCorrectedForAL	6.36937e-05
1684.05		Contig Size	25189
949.028
576.979
262.01
17038.7
17039	Rounded
Query 35	Hit/Subject Chromosome	%ID	AlignLength	Mismatches	Gaps	q-start	q-end	hit-start	hit-end	evalue	bitscore
s_1_1_contig80389	gi|358485511|ref|NC_006088.3|	77.78	12200	2052	166	8327	20274	134283771	134271979	0	9625
s_1_1_contig80389	gi|358485511|ref|NC_006088.3|	81.1	5831	858	88	22895	28616	134270877	134265182	0	5371
s_1_1_contig80389	gi|358485511|ref|NC_006088.3|	79.06	3587	555	54	4012	7531	134287625	134284168	0	3016
s_1_1_contig80389	gi|358485511|ref|NC_006088.3|	82.21	2693	362	41	40	2693	134291360	134288746	0	2617
s_1_1_contig80389	gi|358485511|ref|NC_006088.3|	68.98	3269	753	55	28628	31741	134264977	134261815	0	1312
s_1_1_contig80389	gi|358485511|ref|NC_006088.3|	66.25	886	189	26	20968	21795	134271824	134270991	4e-57	232
s_1_1_contig80389	gi|358485511|ref|NC_006088.3|	82.68	231	36	4	2722	2949	165203946	165204175	2e-54	223
s_1_1_contig80389	gi|358485511|ref|NC_006088.3|	68.24	425	90	7	2997	3398	134288690	134288288	2e-37	167
Sum Matches bp		Sum AlignLength-->	29109
9489.16		NewCorrectedForAL	2.66459e-05
4728.94		TopEvalCorrectedForAL	6.37541e-05
2835.88		Contig Size	31753
2213.92
2241.96	Overlap Removed
586.975
190.991
290.02
22577.8
22578	Rounded
Query 36	Hit/Subject Chromosome	%ID	AlignLength	Mismatches	Gaps	q-start	q-end	hit-start	hit-end	evalue	bitscore
s_1_1_contig73283	gi|358485511|ref|NC_006088.3|	70.84	11044	2121	290	5364	15999	60601295	60611647	0	5083
s_1_1_contig73283	gi|358485511|ref|NC_006088.3|	74.21	1330	234	35	3374	4642	60599843	60601124	0	792
s_1_1_contig73283	gi|358485511|ref|NC_006088.3|	76.52	1035	179	24	1703	2710	60598394	60599391	0	720
s_1_1_contig73283	gi|358485511|ref|NC_006088.3|	70.22	648	139	20	8	646	60595459	60596061	6e-65	257
s_1_1_contig73283	gi|358485511|ref|NC_006088.3|	69.59	411	106	7	1126	1522	60596908	60597313	1e-36	163
Sum Matches bp		Sum AlignLength-->	14468
7823.57		NewCorrectedForAL	4.94164e-05
986.993		TopEvalCorrectedForAL	6.41434e-05
791.982		Contig Size	16089
455.026
286.015
10343.6
10344	Rounded
Query 37	Hit/Subject Chromosome	%ID	AlignLength	Mismatches	Gaps	q-start	q-end	hit-start	hit-end	evalue	bitscore
s_1_1_contig63362	gi|358485504|ref|NC_006095.3|	73.91	11522	2083	232	1	11030	16235615	16246705	0	7012
s_1_1_contig63362	gi|358485504|ref|NC_006095.3|	75.27	1601	250	28	11556	13079	16247111	16248642	0	1108
s_1_1_contig63362	gi|358485504|ref|NC_006095.3|	74.58	885	155	22	13236	14068	16248695	16249561	7e-152	545
Sum Matches bp		Sum AlignLength-->	14008
8515.91		NewCorrectedForAL	5.29038e-05
1205.07		TopEvalCorrectedForAL	6.41468e-05
660.033		Contig Size	14070
10381
10381	Rounded
Query 38	Hit/Subject Chromosome	%ID	AlignLength	Mismatches	Gaps	q-start	q-end	hit-start	hit-end	evalue	bitscore
s_1_1_contig64110	gi|358485510|ref|NC_006089.3|	79.23	12320	1946	168	6334	18375	103330113	103342097	0	10480
s_1_1_contig64110	gi|358485510|ref|NC_006089.3|	80.66	8672	1339	114	23034	31545	103346234	103354727	0	7869
s_1_1_contig64110	gi|358485510|ref|NC_006089.3|	82.08	4135	601	43	18958	23023	103342103	103346166	0	4049
s_1_1_contig64110	gi|358485510|ref|NC_006089.3|	79.85	3167	479	51	2350	5448	103326342	103329417	0	2749
s_1_1_contig64110	gi|358485510|ref|NC_006089.3|	77.69	2398	379	46	31542	33850	103354833	103357163	0	1846
s_1_1_contig64110	gi|358485510|ref|NC_006089.3|	82.87	940	115	14	1184	2081	103325245	103326180	0	948
s_1_1_contig64110	gi|358485510|ref|NC_006089.3|	79.8	921	170	8	129	1041	103324265	103325177	0	801
s_1_1_contig64110	gi|358485510|ref|NC_006089.3|	77.44	492	95	10	5723	6209	103329553	103330033	2e-94	356
Sum Matches bp		Sum AlignLength-->	33045
9761.14		NewCorrectedForAL	2.42103e-05
6994.84		TopEvalCorrectedForAL	6.43101e-05
3394.01		Contig Size	33850
2528.85
1863.01
778.978
734.958
381.005
26436.8
26437	Rounded
Query 39	Hit/Subject Chromosome	%ID	AlignLength	Mismatches	Gaps	q-start	q-end	hit-start	hit-end	evalue	bitscore
s_1_1_contig56736	gi|358485507|ref|NC_006092.3|	76.02	11796	2111	213	2803	14188	7345656	7357143	0	8206
s_1_1_contig56736	gi|358485507|ref|NC_006092.3|	78.51	1833	289	25	19352	21171	7363874	7365614	0	1512
s_1_1_contig56736	gi|358485507|ref|NC_006092.3|	72.58	2159	394	45	17252	19285	7361191	7363276	0	1200
s_1_1_contig56736	gi|358485507|ref|NC_006092.3|	72.67	2082	369	48	14412	16407	7357175	7359142	0	1153
s_1_1_contig56736	gi|358485507|ref|NC_006092.3|	75.84	1275	233	20	23291	24527	7367364	7368601	0	888
s_1_1_contig56736	gi|358485507|ref|NC_006092.3|	72.25	591	114	18	16601	17171	7359248	7359808	4e-75	291
s_1_1_contig56736	gi|358485507|ref|NC_006092.3|	73.12	491	81	12	21945	22429	7365969	7366414	2e-72	282
s_1_1_contig56736	gi|358485507|ref|NC_006092.3|	77.68	345	63	4	21544	21876	7365619	7365961	1e-68	269
s_1_1_contig56736	gi|358485507|ref|NC_006092.3|	92.98	171	11	1	22494	22663	7366551	7366721	4e-63	251
s_1_1_contig56736	gi|358485507|ref|NC_006092.3|	80.56	216	38	2	22842	23055	7366720	7366933	2e-46	196
s_1_1_contig56736	gi|358485507|ref|NC_006092.3|	75.79	252	48	6	277	523	7345025	7345268	4e-37	165
s_1_1_contig56736	gi|358485507|ref|NC_006092.3|	76.07	163	35	3	1294	1454	7345335	7345495	3e-20	109
Sum Matches bp		Sum AlignLength-->	21374
8967.32		NewCorrectedForAL	3.53619e-05
1439.09		TopEvalCorrectedForAL	6.44456e-05
1567		Contig Size	24546
1512.99
966.96
426.998
359.019
267.996
158.996
174.01
190.991
123.994
16155.4
16155	Rounded
Query 40	Hit/Subject Chromosome	%ID	AlignLength	Mismatches	Gaps	q-start	q-end	hit-start	hit-end	evalue	bitscore
s_1_1_contig59884	gi|358485497|ref|NC_006102.3|	74.39	11500	2031	232	4050	14993	8521558	8510417	0	7240
s_1_1_contig59884	gi|358485497|ref|NC_006102.3|	71.38	912	181	22	14996	15891	8510206	8509359	3e-120	441
s_1_1_contig59884	gi|358485497|ref|NC_006102.3|	77.34	459	67	7	16172	16610	8509003	8508562	2e-96	361
s_1_1_contig59884	gi|358485497|ref|NC_006102.3|	68.52	1023	216	32	17471	18449	8507650	8506690	2e-91	345
s_1_1_contig59884	gi|358485497|ref|NC_006102.3|	78.27	336	62	5	2617	2950	8523196	8522870	5e-67	264
s_1_1_contig59884	gi|358485497|ref|NC_006102.3|	75.83	360	63	5	3519	3872	8522793	8522452	7e-65	257
s_1_1_contig59884	gi|358485497|ref|NC_006102.3|	68.93	605	101	21	1471	2007	8524624	8524039	4e-56	228
s_1_1_contig59884	gi|358485497|ref|NC_006102.3|	75.48	261	62	1	16959	17219	8508498	8508240	2e-41	179
s_1_1_contig59884	gi|358485497|ref|NC_006102.3|	83.33	66	11	0	2226	2291	8523998	8523933	2e-08	69.8
s_1_1_contig59884	gi|358485497|ref|NC_006102.3|	80.77	52	10	0	20623	20674	8506155	8506104	0.02	50
s_1_1_contig59884	gi|358485497|ref|NC_006102.3|	67.91	134	31	2	20407	20540	8506344	8506223	0.02	50
Sum Matches bp		Sum AlignLength-->	15708
8554.85		NewCorrectedForAL	4.70128e-05
650.986		TopEvalCorrectedForAL	6.4687e-05
354.991		Contig Size	20871
700.96
262.987
272.988
417.026
197.003
54.9978
42.0004
90.9994
11599.8
11600	Rounded
Query 41	Hit/Subject Chromosome	%ID	AlignLength	Mismatches	Gaps	q-start	q-end	hit-start	hit-end	evalue	bitscore
s_1_1_contig71653	gi|358485506|ref|NC_006093.3|	78.47	12120	1852	208	1503	13245	26349546	26361285	0	9840
s_1_1_contig71653	gi|358485506|ref|NC_006093.3|	65.62	989	248	26	273	1219	26348385	26349323	4e-53	217
Sum Matches bp		Sum AlignLength-->	13109
9510.56		NewCorrectedForAL	5.91227e-05
648.982		TopEvalCorrectedForAL	6.47442e-05
10159.5		Contig Size	13272
10160	Rounded
Query 42	Hit/Subject Chromosome	%ID	AlignLength	Mismatches	Gaps	q-start	q-end	hit-start	hit-end	evalue	bitscore
s_1_1_contig51013	gi|358485510|ref|NC_006089.3|	73.67	11366	2142	221	11997	22899	89024901	89013924	0	6774
s_1_1_contig51013	gi|358485510|ref|NC_006089.3|	69.92	7720	1659	186	3952	11306	89032803	89025382	0	3213
s_1_1_contig51013	gi|358485510|ref|NC_006089.3|	77.58	2872	526	34	65	2869	89037762	89034942	0	2230
s_1_1_contig51013	gi|358485510|ref|NC_006089.3|	71.74	1656	341	35	26876	28487	89011092	89009520	0	834
s_1_1_contig51013	gi|358485510|ref|NC_006089.3|	77.91	679	121	17	26060	26727	89011905	89011245	2e-137	499
s_1_1_contig51013	gi|358485510|ref|NC_006089.3|	73.99	715	156	12	24423	25122	89012744	89012045	3e-115	425
s_1_1_contig51013	gi|358485510|ref|NC_006089.3|	69.28	1032	238	24	23431	24449	89013787	89012822	2e-106	396
s_1_1_contig51013	gi|358485510|ref|NC_006089.3|	71.2	493	120	10	3181	3663	89034394	89033914	6e-55	224
Sum Matches bp		Sum AlignLength-->	26506
8373.33		NewCorrectedForAL	2.74479e-05
5397.82		TopEvalCorrectedForAL	6.48161e-05
2228.1		Contig Size	28489
1188.01
529.009
529.029
687.97	Overlap Removed
351.016
19284.3
19284	Rounded
Query 43	Hit/Subject Chromosome	%ID	AlignLength	Mismatches	Gaps	q-start	q-end	hit-start	hit-end	evalue	bitscore
s_1_1_contig61807	gi|358485499|ref|NC_006100.3|	72.47	11176	2185	241	286	10989	8407101	8396346	0	6001
s_1_1_contig61807	gi|358485499|ref|NC_006100.3|	77.49	995	179	15	14346	15306	8393367	8392384	0	758
s_1_1_contig61807	gi|358485499|ref|NC_006100.3|	76.08	991	157	19	11862	12846	8395503	8394587	0	706
s_1_1_contig61807	gi|358485499|ref|NC_006100.3|	82.05	691	103	11	18584	19264	8389738	8389059	0	657
s_1_1_contig61807	gi|358485499|ref|NC_006100.3|	74.85	839	149	20	20931	21724	8387734	8386913	3e-146	527
s_1_1_contig61807	gi|358485499|ref|NC_006100.3|	82.74	475	72	7	17422	17892	8390966	8390498	3e-127	464
s_1_1_contig61807	gi|358485499|ref|NC_006100.3|	75.55	593	82	13	15809	16396	8391844	8391310	5e-112	414
s_1_1_contig61807	gi|358485499|ref|NC_006100.3|	75.23	541	101	11	20084	20603	8388757	8388229	1e-93	352
s_1_1_contig61807	gi|358485499|ref|NC_006100.3|	72.34	535	116	13	22773	23291	8385808	8385290	5e-68	268
s_1_1_contig61807	gi|358485499|ref|NC_006100.3|	74.3	323	69	8	22214	22524	8386407	8386087	4e-43	185
s_1_1_contig61807	gi|358485499|ref|NC_006100.3|	73.33	300	66	5	11060	11353	8396182	8395891	1e-38	170
s_1_1_contig61807	gi|358485499|ref|NC_006100.3|	81.82	143	23	3	23927	24068	8385012	8384872	8e-27	131
s_1_1_contig61807	gi|358485499|ref|NC_006100.3|	75	176	41	3	15364	15539	8392255	8392083	3e-20	109
s_1_1_contig61807	gi|358485499|ref|NC_006100.3|	78.12	128	23	1	13788	13915	8393824	8393702	3e-19	105
s_1_1_contig61807	gi|358485499|ref|NC_006100.3|	79.55	88	13	2	13690	13777	8394036	8393954	2e-09	73.4
s_1_1_contig61807	gi|358485499|ref|NC_006100.3|	75	68	16	1	22013	22079	8386587	8386520	3.4	42.8
s_1_1_contig61807	gi|358485499|ref|NC_006100.3|	90.32	31	3	0	18016	18046	8389941	8389911	3.4	42.8
Sum Matches bp		Sum AlignLength-->	18093
8099.25		NewCorrectedForAL	4.09706e-05
771.025		TopEvalCorrectedForAL	6.48443e-05
753.953		Contig Size	24068
566.966
627.991
393.015
448.011
406.994
387.019
239.989
219.99
117.003
132
99.9936
70.004
51
27.9992
13412.2
13412	Rounded
Query 44	Hit/Subject Chromosome	%ID	AlignLength	Mismatches	Gaps	q-start	q-end	hit-start	hit-end	evalue	bitscore
s_1_1_contig90651	gi|358485489|ref|NC_006110.3|	79.53	12251	1653	263	1837	13665	4359113	4347296	0	10370
s_1_1_contig90651	gi|358485489|ref|NC_006110.3|	83.69	877	131	6	15400	16266	4345805	4344931	0	921
s_1_1_contig90651	gi|358485489|ref|NC_006110.3|	77.61	612	106	14	13876	14478	4347141	4346552	1e-123	452
s_1_1_contig90651	gi|358485489|ref|NC_006110.3|	76.83	82	14	1	1180	1256	4359991	4359910	2e-06	62.6
Sum Matches bp		Sum AlignLength-->	13822
9743.22		NewCorrectedForAL	5.76558e-05
733.961		TopEvalCorrectedForAL	6.49171e-05
474.973		Contig Size	16302
63.0006
11015.2
11015	Rounded
Query 45	Hit/Subject Chromosome	%ID	AlignLength	Mismatches	Gaps	q-start	q-end	hit-start	hit-end	evalue	bitscore
s_1_1_contig70240	gi|358485511|ref|NC_006088.3|	76.64	11780	1967	206	1	11417	8680390	8691747	0	8615
Hit covers contig		Sum AlignLength-->	11780
		NewCorrectedForAL	NA
		TopEvalCorrectedForAL	6.50594e-05
		Contig Size	11417
Query 46	Hit/Subject Chromosome	%ID	AlignLength	Mismatches	Gaps	q-start	q-end	hit-start	hit-end	evalue	bitscore
s_1_1_contig88512	gi|358485511|ref|NC_006088.3|	78.72	12024	1790	190	16	11650	82360685	82372328	0	9984
Hit covers contig		Sum AlignLength-->	12024
		NewCorrectedForAL	NA
		TopEvalCorrectedForAL	6.54691e-05
		Contig Size	11874
Query 47	Hit/Subject Chromosome	%ID	AlignLength	Mismatches	Gaps	q-start	q-end	hit-start	hit-end	evalue	bitscore
s_1_1_contig65283	gi|358485497|ref|NC_006102.3|	77.76	13120	2065	234	12	12815	278150	265568	0	10220
s_1_1_contig65283	gi|358485497|ref|NC_006102.3|	75.02	3359	581	65	13560	16788	265565	262335	0	2215
s_1_1_contig65283	gi|358485497|ref|NC_006102.3|	80.14	1949	294	28	17278	19166	262096	260181	0	1728
s_1_1_contig65283	gi|358485497|ref|NC_006102.3|	69.48	3086	581	70	22041	25008	258639	255797	0	1328
s_1_1_contig65283	gi|358485497|ref|NC_006102.3|	72.47	672	125	17	21356	21999	260131	259492	1e-94	356
s_1_1_contig65283	gi|358485497|ref|NC_006102.3|	78.16	403	75	7	26095	26493	255701	255308	5e-81	311
Sum Matches bp		Sum AlignLength-->	22589
10202.1		NewCorrectedForAL	3.37669e-05
2519.92		TopEvalCorrectedForAL	5.92683e-05
1561.93		Contig Size	26493
2144.15
486.998
314.985
17230.1
17230	Rounded
Query 48	Hit/Subject Chromosome	%ID	AlignLength	Mismatches	Gaps	q-start	q-end	hit-start	hit-end	evalue	bitscore
s_1_1_contig88233	gi|358485506|ref|NC_006093.3|	72.18	10976	2216	234	1803	12392	22891964	22881440	0	5730
s_1_1_contig88233	gi|358485506|ref|NC_006093.3|	70.82	562	117	16	787	1315	22892524	22891977	3e-61	244
s_1_1_contig88233	gi|358485506|ref|NC_006093.3|	69.35	248	47	9	164	409	22892829	22892609	4e-15	91.5
Sum Matches bp		Sum AlignLength-->	11786
7922.48		NewCorrectedForAL	6.11332e-05
398.008		TopEvalCorrectedForAL	6.57617e-05
171.988		Contig Size	12432
8492.47
8492	Rounded
Query 49	Hit/Subject Chromosome	%ID	AlignLength	Mismatches	Gaps	q-start	q-end	hit-start	hit-end	evalue	bitscore
s_1_1_contig52436	gi|358485502|ref|NC_006097.3|	76.29	11519	1960	214	3	11153	15499510	15488395	0	8192
s_1_1_contig52436	gi|358485502|ref|NC_006097.3|	73.84	302	66	6	11408	11704	15487764	15487471	4e-40	174
Sum Matches bp		Sum AlignLength-->	11821
8787.85		NewCorrectedForAL	6.44859e-05
222.997		TopEvalCorrectedForAL	6.62297e-05
9010.84		Contig Size	11860
9011
Query 50	Hit/Subject Chromosome	%ID	AlignLength	Mismatches	Gaps	q-start	q-end	hit-start	hit-end	evalue	bitscore
s_1_1_contig78675	gi|358485502|ref|NC_006097.3|	75.65	11438	1875	222	367	11254	12646148	12657225	0	7891
s_1_1_contig78675	gi|358485502|ref|NC_006097.3|	73.08	5391	960	124	14183	19205	12659833	12665100	0	3065
s_1_1_contig78675	gi|358485502|ref|NC_006097.3|	66.83	1589	315	72	11463	12987	12657477	12658917	1e-94	356
s_1_1_contig78675	gi|358485502|ref|NC_006097.3|	88.51	174	20	0	19287	19460	12665967	12666140	4e-55	224
s_1_1_contig78675	gi|358485502|ref|NC_006097.3|	90.55	127	12	0	20140	20266	12666651	12666777	2e-40	176
s_1_1_contig78675	gi|358485502|ref|NC_006097.3|	71.47	361	78	9	13225	13578	12659118	12659460	3e-38	168
Sum Matches bp		Sum AlignLength-->	19080
8652.85		NewCorrectedForAL	3.89566e-05
3939.74		TopEvalCorrectedForAL	6.61392e-05
1061.93		Contig Size	20312
154.007
114.998
258.007
14181.5
14182
Query 51	Hit/Subject Chromosome	%ID	AlignLength	Mismatches	Gaps	q-start	q-end	hit-start	hit-end	evalue	bitscore
s_1_1_contig91686	gi|358485502|ref|NC_006097.3|	72.31	10896	2131	246	11154	21609	16805781	16795332	0	5737
s_1_1_contig91686	gi|358485502|ref|NC_006097.3|	73.41	3509	718	80	7315	10721	16809700	16806305	0	1956
s_1_1_contig91686	gi|358485502|ref|NC_006097.3|	75.24	2165	391	48	29872	31971	16786233	16784149	0	1402
s_1_1_contig91686	gi|358485502|ref|NC_006097.3|	77.35	1863	318	37	31995	33805	16784050	16782240	0	1384
s_1_1_contig91686	gi|358485502|ref|NC_006097.3|	70.09	2882	642	59	25227	28039	16790434	16787704	0	1243
s_1_1_contig91686	gi|358485502|ref|NC_006097.3|	75.52	1589	315	30	22190	23759	16793062	16791529	0	1043
s_1_1_contig91686	gi|358485502|ref|NC_006097.3|	84.86	700	80	10	24406	25082	16791232	16790536	0	764
s_1_1_contig91686	gi|358485502|ref|NC_006097.3|	68.85	1830	387	46	2896	4583	16814522	16812734	0	688
s_1_1_contig91686	gi|358485502|ref|NC_006097.3|	68.47	1814	364	51	5474	7215	16811534	16809857	0	650
s_1_1_contig91686	gi|358485502|ref|NC_006097.3|	74.59	984	157	23	28664	29583	16787675	16786721	2e-176	628
s_1_1_contig91686	gi|358485502|ref|NC_006097.3|	78.71	695	107	16	33874	34564	16782008	16781351	4e-153	551
s_1_1_contig91686	gi|358485502|ref|NC_006097.3|	71.97	1088	213	30	135	1178	16816316	16815277	3e-148	535
s_1_1_contig91686	gi|358485502|ref|NC_006097.3|	70.91	794	138	19	1440	2215	16815243	16814525	3e-104	389
s_1_1_contig91686	gi|358485502|ref|NC_006097.3|	77.61	402	63	4	35631	36023	16781318	16780935	3e-85	325
s_1_1_contig91686	gi|358485502|ref|NC_006097.3|	69.79	384	96	7	5032	5405	16811912	16811539	3e-34	156
Sum Matches bp		Sum AlignLength-->	31595
7878.9		NewCorrectedForAL	2.30885e-05
2575.96		TopEvalCorrectedForAL	6.63638e-05
1628.95		Contig Size	36023
1441.03
2019.99
1200.01
594.02
1259.95
1242.05
733.966
547.034
783.034
563.025
311.992
267.994
23047.9
23048
Query 52	Hit/Subject Chromosome	%ID	AlignLength	Mismatches	Gaps	q-start	q-end	hit-start	hit-end	evalue	bitscore
s_1_1_contig55306	gi|358485511|ref|NC_006088.3|	72.37	10871	2040	259	576	10986	68956983	68967349	0	5763
Hit covers contig		Sum AlignLength-->	10871
		NewCorrectedForAL	NA
		TopEvalCorrectedForAL	6.65716e-05
		Contig Size	11054
Query 53	Hit/Subject Chromosome	%ID	AlignLength	Mismatches	Gaps	q-start	q-end	hit-start	hit-end	evalue	bitscore
s_1_1_contig74301	gi|358485510|ref|NC_006089.3|	73.89	11096	2151	216	73	10899	135959230	135969848	0	6648
s_1_1_contig74301	gi|358485510|ref|NC_006089.3|	70.11	853	186	21	10958	11780	135969846	135970659	6e-95	356
Sum Matches bp		Sum AlignLength-->	11949
8198.83		NewCorrectedForAL	6.16129e-05
598.038		TopEvalCorrectedForAL	6.65916e-05
8796.87		Contig Size	12507
8797	Rounded
Query 54	Hit/Subject Chromosome	%ID	AlignLength	Mismatches	Gaps	q-start	q-end	hit-start	hit-end	evalue	bitscore
s_1_1_contig63562	gi|358485497|ref|NC_006102.3|	75.72	11351	1865	241	424	11305	9046806	9057734	0	7762
s_1_1_contig63562	gi|358485497|ref|NC_006102.3|	77.17	2589	425	46	13643	16124	9059642	9062171	0	1947
s_1_1_contig63562	gi|358485497|ref|NC_006102.3|	73.98	2575	418	50	20891	23373	9066078	9068492	0	1626
s_1_1_contig63562	gi|358485497|ref|NC_006102.3|	74.74	1999	298	40	23794	25714	9068654	9070523	0	1335
s_1_1_contig63562	gi|358485497|ref|NC_006102.3|	74.36	1927	341	28	11392	13212	9057745	9059624	0	1260
s_1_1_contig63562	gi|358485497|ref|NC_006102.3|	79.06	1366	236	16	17769	19119	9063675	9065005	0	1148
s_1_1_contig63562	gi|358485497|ref|NC_006102.3|	78.88	1037	149	13	16302	17290	9062228	9063242	0	888
s_1_1_contig63562	gi|358485497|ref|NC_006102.3|	80.29	416	64	3	20349	20762	9065643	9066042	9e-103	383
s_1_1_contig63562	gi|358485497|ref|NC_006102.3|	71.93	424	96	6	19852	20268	9065225	9065632	2e-54	223
s_1_1_contig63562	gi|358485497|ref|NC_006102.3|	82.66	173	28	2	8	179	9046481	9046652	1e-38	170
Sum Matches bp		Sum AlignLength-->	23857
8594.98		NewCorrectedForAL	3.18102e-05
1997.93		TopEvalCorrectedForAL	6.67078e-05
1904.99		Contig Size	25877
1494.05
1432.92
1079.96
817.986
334.006
304.983
143.002
18104.8
18105	Rounded
Query 55	Hit/Subject Chromosome	%ID	AlignLength	Mismatches	Gaps	q-start	q-end	hit-start	hit-end	evalue	bitscore
s_1_1_contig101667	gi|358485500|ref|NC_006099.3|	72.91	10927	1950	255	4405	14796	1882501	1872050	0	6121
s_1_1_contig101667	gi|358485500|ref|NC_006099.3|	72.73	3194	583	69	15982	19029	1871768	1868717	0	1783
s_1_1_contig101667	gi|358485500|ref|NC_006099.3|	74.31	1082	182	27	60	1102	1885341	1884317	0	663
s_1_1_contig101667	gi|358485500|ref|NC_006099.3|	74.26	1014	208	24	1904	2910	1883655	1882688	7e-166	592
s_1_1_contig101667	gi|358485500|ref|NC_006099.3|	70.7	488	100	13	1114	1577	1884225	1883757	2e-52	215
s_1_1_contig101667	gi|358485500|ref|NC_006099.3|	75	244	48	5	15360	15590	1872027	1871784	6e-34	154
Sum Matches bp		Sum AlignLength-->	16949
7966.88		NewCorrectedForAL	4.30782e-05
2323		TopEvalCorrectedForAL	6.67246e-05
804.034		Contig Size	19138
752.996
345.016
183
12374.9
12375
Query 56	Hit/Subject Chromosome	%ID	AlignLength	Mismatches	Gaps	q-start	q-end	hit-start	hit-end	evalue	bitscore
s_1_1_contig52927	gi|358485504|ref|NC_006095.3|	80.42	12010	1791	156	3854	15564	26116663	26104916	0	10860
s_1_1_contig52927	gi|358485504|ref|NC_006095.3|	77.03	3836	604	64	1	3715	26120700	26117021	0	2908
s_1_1_contig52927	gi|358485504|ref|NC_006095.3|	85.55	1073	121	12	16817	17875	26104263	26103211	0	1213
s_1_1_contig52927	gi|358485504|ref|NC_006095.3|	86.08	503	59	7	18279	18775	26102868	26102371	2e-159	571
s_1_1_contig52927	gi|358485504|ref|NC_006095.3|	84.87	119	18	0	3720	3838	22699075	22699193	6e-28	134
s_1_1_contig52927	gi|358485504|ref|NC_006095.3|	72.86	210	38	3	16414	16622	26104587	26104396	3e-25	125
Sum Matches bp		Sum AlignLength-->	17751
9658.44		NewCorrectedForAL	4.51225e-05
2954.87		TopEvalCorrectedForAL	6.69609e-05
917.951		Contig Size	19129
432.982
100.995
153.006
14218.2
14218

## Sheet: ConservedOutliersFromZF-QC
Table S15: SMAC contigs	classified as conserved outliers were aligned	to ZF with no Evalue	bound.	Thereafter	we	recalculated	the	composite	variable	via	summation.			Legend	Definition/Descriptions
Query 1	Hit/Subject Chromosome	%ID	AlignLength	Mismatches	Gaps	q-start	q-end	hit-start	hit-end	evalue	bitscore			NewCorrectedForAL	New QC calculation for the composite variable based on no Evalue bound and the summation of hits across the majority of the contig's length
s_1_1_contig64190	gi|224381677|ref|NC_011463.1|NC_011463	77.67	23269	3662	383	4741	27281	56089476	56067013	0	18200			TopEvalCorrectedForAL	Original value of the composite variable constructed for alignment data corresponding to only the Top Evalue Hit
s_1_1_contig64190	gi|224381677|ref|NC_011463.1|NC_011463	84.51	3325	371	43	1	3259	56094415	56091169	0	3611
s_1_1_contig64190	gi|224381677|ref|NC_011463.1|NC_011463	76.77	3177	520	51	30411	33549	56063776	56060780	0	2369
s_1_1_contig64190	gi|224381677|ref|NC_011463.1|NC_011463	75.52	3154	559	49	27385	30407	56066931	56063860	0	2179
s_1_1_contig64190	gi|224381677|ref|NC_011463.1|NC_011463	77.45	1437	208	28	3335	4734	56091051	56089694	0	1110
Sum Matches bp		Sum AlignLength-->	34362
18073		NewCorrectedForAL	2.27119e-05
2809.96		TopEvalCorrectedForAL	3.33792e-05
2438.98		Contig Size	33568
2381.9
1112.96
26816.8
26817	Rounded
Query 2	Hit/Subject Chromosome	%ID	AlignLength	Mismatches	Gaps	q-start	q-end	hit-start	hit-end	evalue	bitscore
s_1_1_contig64241	gi|224381669|ref|NC_011476.1|NC_011476	82.68	23579	2877	338	24	23094	17426573	17449452	0	23670
Note, there is really	only one meaningful hit here	Sum AlignLenght-->	23579
So the original	TopEvalCorrectedForAL stat stands.	TopEvalCorrectedForAL	3.50651e-05
		Contig Size	23181
Query 3	Hit/Subject Chromosome	%ID	AlignLength	Mismatches	Gaps	q-start	q-end	hit-start	hit-end	evalue	bitscore
s_1_1_contig89590	gi|224381690|ref|NC_011467.1|NC_011467	75.08	20289	3489	401	86	19635	62802854	62822313	0	13400
s_1_1_contig89590	gi|224381690|ref|NC_011467.1|NC_011467	83.74	2546	316	41	19757	22254	62822309	62824804	0	2628
Sums Matches bp		Sum AlignLenght-->	22835
15233		NewCorrectedForAL	3.33022e-05
2132.02		TopEvalCorrectedForAL	3.70053e-05
17365		Contig Size	22254
17365	Rounded
Query 4	Hit/Subject Chromosome	%ID	AlignLength	Mismatches	Gaps	q-start	q-end	hit-start	hit-end	evalue	bitscore
s_1_1_contig78490	gi|224381679|ref|NC_011465.1|NC_011465	78.42	21170	3272	325	1	20639	17357772	17378175	0	17280
Note, there is really	only one meaningful hit here, with one	Sum AlignLenght-->	21170
other short overlapping	hit, So TopEvalCorrectedForAL stat stands.	TopEvalCorrectedForAL	3.7043e-05
		Contig Size	20793
Query 5	Hit/Subject Chromosome	%ID	AlignLength	Mismatches	Gaps	q-start	q-end	hit-start	hit-end	evalue	bitscore
s_1_1_contig86961	gi|224381693|ref|NC_011470.1|NC_011470	79.97	21011	3123	312	1	20422	26939191	26959705	0	18490
Note, there is really	only one meaningful hit here, with one	Sum AlignLenght-->	21011
other shorter overlapping	hit, So TopEvalCorrectedForAL stat stands.	TopEvalCorrectedForAL	3.8061e-05
		Contig Size	20457
Query 6	Hit/Subject Chromosome	%ID	AlignLength	Mismatches	Gaps	q-start	q-end	hit-start	hit-end	evalue	bitscore
s_1_1_contig62050	gi|224381694|ref|NC_011471.1|NC_011471	84.35	22121	2667	192	4662	26446	18158868	18137207	0	24140
s_1_1_contig62050	gi|224381694|ref|NC_011471.1|NC_011471	74.27	4788	881	80	25	4617	18163985	18159354	0	3036
Sum Matches bp		Sum AlignLenght-->	26909
18659.1		NewCorrectedForAL	3.06797e-05
3556.05		TopEvalCorrectedForAL	3.81312e-05
22215.1		Contig Size
22215	Rounded
Query 7	Hit/Subject Chromosome	%ID	AlignLength	Mismatches	Gaps	q-start	q-end	hit-start	hit-end	evalue	bitscore
s_1_1_contig70187	gi|224381676|ref|NC_011483.1|NC_011483	75.57	19653	3262	390	8036	27191	4929156	4910546	0	13430
s_1_1_contig70187	gi|224381676|ref|NC_011483.1|NC_011483	78.99	3951	618	54	1	3843	4937253	4933407	0	3332
s_1_1_contig70187	gi|224381676|ref|NC_011483.1|NC_011483	79.98	1319	216	19	3913	5205	4933229	4931933	0	1146
s_1_1_contig70187	gi|224381676|ref|NC_011483.1|NC_011483	75.33	1536	277	27	6182	7692	4930843	4929385	0	1032
s_1_1_contig70187	gi|224381676|ref|NC_011483.1|NC_011483	77.05	767	132	15	5225	5956	4931837	4931080	2e-156	562
Sum Matches bp		Sum AlignLenght-->	27226
14851.8		NewCorrectedForAL	2.80281e-05
3120.89		TopEvalCorrectedForAL	3.84521e-05
1054.94		Contig Size	27209
1157.07
590.973
20775.6
20776	Rounded
Query 8	Hit/Subject Chromosome	%ID	AlignLength	Mismatches	Gaps	q-start	q-end	hit-start	hit-end	evalue	bitscore
s_1_1_contig104302	gi|224381679|ref|NC_011465.1|NC_011465	80.72	20664	2932	266	320	20619	69956668	69936692	0	19060
s_1_1_contig104302	gi|224381679|ref|NC_011465.1|NC_011465	82.31	390	53	6	3	380	69957767	69957382	1e-101	379
Note, small overlap in the	appended hits	Sum AlignLenght-->	20994
Sum Matches bp		NewCorrectedForAL	3.84619e-05
16680		TopEvalCorrectedForAL	3.90631e-05
271.623		Contig Size	20639
16951.6
16952	Rounded
Query 9	Hit/Subject Chromosome	%ID	AlignLength	Mismatches	Gaps	q-start	q-end	hit-start	hit-end	evalue	bitscore
s_1_1_contig63925	gi|224381672|ref|NC_011479.1|NC_011479	79.99	20322	2953	335	6102	25976	7179825	7199479	0	17810
s_1_1_contig63925	gi|224381672|ref|NC_011479.1|NC_011479	81.35	13413	1725	200	30910	43966	7204050	7217041	0	12710
s_1_1_contig63925	gi|224381672|ref|NC_011479.1|NC_011479	81.61	5798	713	92	53731	59346	7228072	7233698	0	5553
s_1_1_contig63925	gi|224381672|ref|NC_011479.1|NC_011479	81.34	3446	489	52	44524	47902	7220240	7223598	0	3220
s_1_1_contig63925	gi|224381672|ref|NC_011479.1|NC_011479	81.23	3048	428	45	1	2983	7173729	7176697	0	2845
s_1_1_contig63925	gi|224381672|ref|NC_011479.1|NC_011479	78.6	3140	444	61	39282	42343	7217144	7220133	0	2563
s_1_1_contig63925	gi|224381672|ref|NC_011479.1|NC_011479	78.62	2704	411	37	50049	52649	7225224	7227863	0	2255
s_1_1_contig63925	gi|224381672|ref|NC_011479.1|NC_011479	75.29	2756	451	47	26142	28854	7199497	7202065	0	1896
s_1_1_contig63925	gi|224381672|ref|NC_011479.1|NC_011479	85.7	1266	98	12	3149	4403	7177239	7178432	0	1489
s_1_1_contig63925	gi|224381672|ref|NC_011479.1|NC_011479	77.67	1827	236	31	28990	30739	7202092	7203823	0	1471
s_1_1_contig63925	gi|224381672|ref|NC_011479.1|NC_011479	76.64	1434	252	23	60539	61929	7234357	7235750	0	1047
s_1_1_contig63925	gi|224381672|ref|NC_011479.1|NC_011479	79.8	990	162	9	47944	48921	7223715	7224678	0	877
s_1_1_contig63925	gi|224381672|ref|NC_011479.1|NC_011479	78.02	878	149	11	5066	5929	7178614	7179461	0	704
s_1_1_contig63925	gi|224381672|ref|NC_011479.1|NC_011479	80.55	761	106	18	59677	60422	7233708	7234441	0	663
s_1_1_contig63925	gi|224381672|ref|NC_011479.1|NC_011479	80.72	503	64	7	49352	49838	7224678	7225163	8e-128	468
s_1_1_contig63925	gi|224381672|ref|NC_011479.1|NC_011479	72.04	186	25	6	53466	53636	7227860	7228033	1e-16	98.7
s_1_1_contig63925	gi|224381672|ref|NC_011479.1|NC_011479	81.73	104	18	1	60430	60532	7236884	7236987	1e-16	98.7
s_1_1_contig63925	gi|224381672|ref|NC_011479.1|NC_011479	74.19	124	29	1	49930	50050	11948477	11948354	1e-10	78.8
Note, 2bp of overlap		Sum AlignLenght-->	62698
Sum Matches bp		NewCorrectedForAL	1.22426e-05
16255.6		TopEvalCorrectedForAL	3.93613e-05
10911.5		Contig Size	61939
4731.75
2802.98
2475.89
2468.04
2074.99
1084.96
1419.03
1099.02
790.02
685.016
612.986
406.022
133.994
84.9992
89.9956
48125.7
48126	Rounded
Query 10	Hit/Subject Chromosome	%ID	AlignLength	Mismatches	Gaps	q-start	q-end	hit-start	hit-end	evalue	bitscore
s_1_1_contig50985	gi|224381690|ref|NC_011467.1|NC_011467	76.26	19367	3295	313	1523	20296	44315467	44334123	0	13960
s_1_1_contig50985	gi|224381690|ref|NC_011467.1|NC_011467	75.74	8142	1391	148	20587	28387	44335382	44343280	0	5638
s_1_1_contig50985	gi|224381690|ref|NC_011467.1|NC_011467	75.69	4923	809	95	28441	33171	44343406	44348132	0	3404
s_1_1_contig50985	gi|224381690|ref|NC_011467.1|NC_011467	78.97	1455	245	21	1	1448	44313810	44315210	0	1205
s_1_1_contig50985	gi|224381690|ref|NC_011467.1|NC_011467	72.9	310	54	9	20296	20585	44334292	44334591	2e-37	167
s_1_1_contig50985	gi|224381690|ref|NC_011467.1|NC_011467	79.21	178	22	5	33797	33972	44348813	44348977	6e-31	145
s_1_1_contig50985	gi|224381690|ref|NC_011467.1|NC_011467	86.44	118	16	0	34195	34312	44349257	44349374	8e-30	141
Sum Matches bp		Sum AlignLenght-->	34493
14769.3		NewCorrectedForAL	3.93398e-05
6166.75		TopEvalCorrectedForAL	3.93763e-05
3726.22		Contig Size	34367
1149.01
225.99
140.994
101.999
26280.2
26280	Rounded
Query 11	Hit/Subject Chromosome	%ID	AlignLength	Mismatches	Gaps	q-start	q-end	hit-start	hit-end	evalue	bitscore
s_1_1_contig70407	gi|224381696|ref|NC_011473.1|NC_011473	74.85	18747	3222	357	6662	24631	7038783	7020753	0	12290
s_1_1_contig70407	gi|224381696|ref|NC_011473.1|NC_011473	78.18	2488	398	30	2870	5278	7042510	7040089	0	2035
s_1_1_contig70407	gi|224381696|ref|NC_011473.1|NC_011473	75.13	1166	197	23	5317	6428	7039977	7038851	0	776
s_1_1_contig70407	gi|224381696|ref|NC_011473.1|NC_011473	74.3	1074	193	28	155	1191	7045205	7044178	2e-180	641
s_1_1_contig70407	gi|224381696|ref|NC_011473.1|NC_011473	71.64	1026	213	19	1885	2857	7044157	7043157	4e-145	524
s_1_1_contig70407	gi|224381696|ref|NC_011473.1|NC_011473	76.72	232	40	4	6439	6661	5436802	5437028	1e-38	170
Sum Matches bp		Sum AlignLenght-->	24733
14032.1		NewCorrectedForAL	3.03472e-05
1945.12		TopEvalCorrectedForAL	3.99264e-05
876.016		Contig Size	24669
797.982
735.026
177.99
18564.3
18564	Rounded
Query 12	Hit/Subject Chromosome	%ID	AlignLength	Mismatches	Gaps	q-start	q-end	hit-start	hit-end	evalue	bitscore
s_1_1_contig69572	gi|224381690|ref|NC_011467.1|NC_011467	76.99	19219	3110	327	5654	24288	16397199	16378710	0	14430
s_1_1_contig69572	gi|224381690|ref|NC_011467.1|NC_011467	72.06	3411	690	72	11	3309	16402332	16399073	0	1768
s_1_1_contig69572	gi|224381690|ref|NC_011467.1|NC_011467	77.71	1987	312	31	26260	28193	16375721	16373813	0	1564
s_1_1_contig69572	gi|224381690|ref|NC_011467.1|NC_011467	75.04	1382	233	30	24360	25690	16378585	16377265	0	902
s_1_1_contig69572	gi|224381690|ref|NC_011467.1|NC_011467	71.53	1549	295	31	4002	5523	16398769	16397340	0	798
s_1_1_contig69572	gi|224381690|ref|NC_011467.1|NC_011467	69.04	743	142	24	25770	26467	16377257	16376558	4e-70	275
s_1_1_contig69572	gi|224381690|ref|NC_011467.1|NC_011467	74.91	267	54	4	3426	3692	16399064	16398811	1e-39	174
s_1_1_contig69572	gi|224381690|ref|NC_011467.1|NC_011467	81.36	59	9	1	3346	3402	8924966	8925024	0.0007	55.4
s_1_1_contig69572	gi|224381690|ref|NC_011467.1|NC_011467	100	23	0	0	24969	24991	7798121	7798099	4.5	42.8
Sum Matches bp		Sum AlignLenght-->	28640
14796.7		NewCorrectedForAL	2.64895e-05
2457.97		TopEvalCorrectedForAL	4.00593e-05
1544.1		Contig Size	28225
1037.05
1108
512.967
200.01
48.0024
23
21727.8
21728	Rounded
Query 13	Hit/Subject Chromosome	%ID	AlignLength	Mismatches	Gaps	q-start	q-end	hit-start	hit-end	evalue	bitscore
s_1_1_contig68010	gi|224381691|ref|NC_011468.1|NC_011468	74.48	18112	3069	380	9011	26482	9276271	9259073	0	11510
s_1_1_contig68010	gi|224381691|ref|NC_011468.1|NC_011468	76.63	4677	749	82	3543	7996	9294708	9290153	0	3447
s_1_1_contig68010	gi|224381691|ref|NC_011468.1|NC_011468	74.27	3684	657	76	5	3544	9298422	9294886	0	2289
s_1_1_contig68010	gi|224381691|ref|NC_011468.1|NC_011468	76.22	2267	385	48	26487	28711	9259006	9256852	0	1581
s_1_1_contig68010	gi|224381691|ref|NC_011468.1|NC_011468	73.98	1699	322	35	29030	30693	9256837	9255224	0	1021
s_1_1_contig68010	gi|224381691|ref|NC_011468.1|NC_011468	75.96	104	22	2	8490	8590	9276675	9276572	4e-08	69.8
Sum Matches bp		Sum AlignLenght-->	30543
13489.8		NewCorrectedForAL	2.45199e-05
3583.99		TopEvalCorrectedForAL	4.11219e-05
2736.11		Contig Size	30868
1727.91
1256.92
78.9984
22873.7
22874
Query 14	Hit/Subject Chromosome	%ID	AlignLength	Mismatches	Gaps	q-start	q-end	hit-start	hit-end	evalue	bitscore
s_1_1_contig68645	gi|224381695|ref|NC_011472.1|NC_011472	80.17	19342	2736	279	351	19253	17390368	17409049	0	17320
s_1_1_contig68645	gi|224381695|ref|NC_011472.1|NC_011472	75.6	250	57	1	61	306	17389999	17390248	2e-40	176
Sum Matches bp		Sum AlignLenght-->	19592
15506.5		NewCorrectedForAL	4.08913e-05
189		TopEvalCorrectedForAL	4.14487e-05
15695.5		Contig Size	19308
15696
Query 15	Hit/Subject Chromosome	%ID	AlignLength	Mismatches	Gaps	q-start	q-end	hit-start	hit-end	evalue	bitscore
s_1_1_contig69335	gi|224381696|ref|NC_011473.1|NC_011473	76.73	18170	2986	313	4676	22403	18346149	18363518	0	13410
s_1_1_contig69335	gi|224381696|ref|NC_011473.1|NC_011473	76.63	4147	721	81	22731	26772	18363705	18367708	0	2969
s_1_1_contig69335	gi|224381696|ref|NC_011473.1|NC_011473	76.18	1331	229	22	2913	4214	18344871	18346142	0	951
s_1_1_contig69335	gi|224381696|ref|NC_011473.1|NC_011473	82.02	929	116	13	828	1727	18342804	18343710	0	910
s_1_1_contig69335	gi|224381696|ref|NC_011473.1|NC_011473	72.96	821	164	11	64	844	18343929	18344731	1e-132	482
s_1_1_contig69335	gi|224381696|ref|NC_011473.1|NC_011473	84	50	5	1	10	59	7721724	7721770	0.002	53.6
Sum Matches bp		Sum AlignLenght-->	25431
13941.8		NewCorrectedForAL	3.01823e-05
3177.85		TopEvalCorrectedForAL	4.22289e-05
1013.96		Contig Size	26772
761.966
582.002	Minor Overlap removed
42
19519.6
19520	Rounded
Query 16	Hit/Subject Chromosome	%ID	AlignLength	Mismatches	Gaps	q-start	q-end	hit-start	hit-end	evalue	bitscore
s_1_1_contig87001	gi|224381667|ref|NC_011474.1|NC_011474	76.33	17907	2806	389	6471	23752	12578473	12561375	0	12720
s_1_1_contig87001	gi|224381667|ref|NC_011474.1|NC_011474	73.61	6097	1073	155	519	6359	12584498	12578682	0	3526
Sum Matches bp		Sum AlignLenght-->	24004
13668.4		NewCorrectedForAL	3.15103e-05
4488		TopEvalCorrectedForAL	4.26258e-05
18156.4		Contig Size	23908
18156	Rounded
Query 17	Hit/Subject Chromosome	%ID	AlignLength	Mismatches	Gaps	q-start	q-end	hit-start	hit-end	evalue	bitscore
s_1_1_contig98652	gi|224381695|ref|NC_011472.1|NC_011472	78.78	17814	2653	289	1585	18870	5538403	5521189	0	14800
s_1_1_contig98652	gi|224381695|ref|NC_011472.1|NC_011472	77.86	1617	253	28	10	1584	5540029	5538476	0	1270
Sum Matches bp		Sum AlignLenght-->	19431
14033.9		NewCorrectedForAL	4.05044e-05
1259		TopEvalCorrectedForAL	4.42236e-05
15292.9		Contig Size
15293	Rounded
Query 18	Hit/Subject Chromosome	%ID	AlignLength	Mismatches	Gaps	q-start	q-end	hit-start	hit-end	evalue	bitscore
s_1_1_contig68856	gi|224381689|ref|NC_011466.1|NC_011466	81.51	18337	2302	259	2548	20432	70620554	70638254	0	17600
s_1_1_contig68856	gi|224381689|ref|NC_011466.1|NC_011466	79.3	2473	353	48	20433	22829	70638355	70640744	0	2078
s_1_1_contig68856	gi|224381689|ref|NC_011466.1|NC_011466	74.88	1202	225	17	938	2109	70619392	70620546	0	800
s_1_1_contig68856	gi|224381689|ref|NC_011466.1|NC_011466	96.35	192	6	1	1	192	70618649	70618839	5e-81	311
Sum Matches bp		Sum AlignLenght-->	22204
14946.5		NewCorrectedForAL	3.64957e-05
1961.09		TopEvalCorrectedForAL	4.44511e-05
900.058		Contig Size	22855
184.992
17992.6
17993
Query 19	Hit/Subject Chromosome	%ID	AlignLength	Mismatches	Gaps	q-start	q-end	hit-start	hit-end	evalue	bitscore
s_1_1_contig65216	gi|224381696|ref|NC_011473.1|NC_011473	77.96	17336	2754	290	10517	27410	16704714	16721424	0	13690
s_1_1_contig65216	gi|224381696|ref|NC_011473.1|NC_011473	78.08	4694	757	76	3411	7990	16697488	16702023	0	3728
s_1_1_contig65216	gi|224381696|ref|NC_011473.1|NC_011473	77.32	3281	540	56	27415	30611	16721569	16724729	0	2495
s_1_1_contig65216	gi|224381696|ref|NC_011473.1|NC_011473	80.85	2616	430	22	53	2650	16694892	16697454	0	2425
s_1_1_contig65216	gi|224381696|ref|NC_011473.1|NC_011473	77.04	2369	395	33	8202	10498	16702250	16704541	0	1806
s_1_1_contig65216	gi|224381696|ref|NC_011473.1|NC_011473	73.73	1797	338	31	31086	32842	16726981	16728683	0	1094
s_1_1_contig65216	gi|224381696|ref|NC_011473.1|NC_011473	76	125	27	1	30913	31037	16724725	16724846	4e-14	89.7
Sum Matches bp		Sum AlignLenght-->	32218
13515.1		NewCorrectedForAL	2.4159e-05
3665.08		TopEvalCorrectedForAL	4.497e-05
2536.87		Contig Size	33351
2115.04
1825.08
1324.93
95
25077.1
25077
Query 20	Hit/Subject Chromosome	%ID	AlignLength	Mismatches	Gaps	q-start	q-end	hit-start	hit-end	evalue	bitscore
s_1_1_contig73377	gi|224381666|ref|NC_011462.1|NC_011462	75.33	16560	2794	332	11342	27437	29987647	30003379	0	11120
s_1_1_contig73377	gi|224381666|ref|NC_011462.1|NC_011462	76.92	4389	761	74	94	4376	29976376	29980618	0	3241
s_1_1_contig73377	gi|224381666|ref|NC_011462.1|NC_011462	79.74	2809	442	51	5355	8114	29981068	29983798	0	2385
s_1_1_contig73377	gi|224381666|ref|NC_011462.1|NC_011462	69.91	5167	999	114	29845	34658	30007243	30012206	0	2295
s_1_1_contig73377	gi|224381666|ref|NC_011462.1|NC_011462	79.37	2244	340	43	27457	29618	30003458	30005660	0	1876
s_1_1_contig73377	gi|224381666|ref|NC_011462.1|NC_011462	74.64	2725	490	46	8258	10861	29984098	29986742	0	1773
Sum Matches bp		Sum AlignLenght-->	33894
12474.6		NewCorrectedForAL	2.22127e-05
3376.02		TopEvalCorrectedForAL	4.54891e-05
2239.9		Contig Size	34666
3612.25
1781.06
2033.94
25517.8
25518
Query 21	Hit/Subject Chromosome	%ID	AlignLength	Mismatches	Gaps	q-start	q-end	hit-start	hit-end	evalue	bitscore
s_1_1_contig61698	gi|224381679|ref|NC_011465.1|NC_011465	77.04	16935	2732	342	95	16495	10923133	10939444	0	12510
Only one viable hit that	covers the vast majority of the contig	Sum AlignLenght-->	16935
		NewCorrectedForAL	NA
		TopEvalCorrectedForAL	4.54916e-05
		Contig Size	16567
Query 22	Hit/Subject Chromosome	%ID	AlignLength	Mismatches	Gaps	q-start	q-end	hit-start	hit-end	evalue	bitscore
s_1_1_contig59560	gi|224381690|ref|NC_011467.1|NC_011467	75.8	16648	2678	325	1595	17636	63224925	63209022	0	11610
s_1_1_contig59560	gi|224381690|ref|NC_011467.1|NC_011467	77.05	3830	662	63	19697	23363	63206874	63203099	0	2856
s_1_1_contig59560	gi|224381690|ref|NC_011467.1|NC_011467	81.34	1929	258	39	17628	19482	63208966	63207066	0	1772
s_1_1_contig59560	gi|224381690|ref|NC_011467.1|NC_011467	74.12	1681	280	43	1	1597	63226843	63225234	0	1016
Sum Matches bp		Sum AlignLenght-->	24076
12619.2		NewCorrectedForAL	3.16965e-05
2951.01		TopEvalCorrectedForAL	4.5531e-05
1560.05	Minor Overlap Removed.	Contig Size	23381
1242.96	Minor Overlap Removed.
18373.2
18373	Rounded
Query 23	Hit/Subject Chromosome	%ID	AlignLength	Mismatches	Gaps	q-start	q-end	hit-start	hit-end	evalue	bitscore
s_1_1_contig71395	gi|224381666|ref|NC_011462.1|NC_011462	75.97	16575	2907	278	2724	18914	41757672	41773554	0	11650
s_1_1_contig71395	gi|224381666|ref|NC_011462.1|NC_011462	73.42	1535	307	30	1255	2723	41755911	41757410	0	884
s_1_1_contig71395	gi|224381666|ref|NC_011462.1|NC_011462	76.72	945	167	16	1	924	41754986	41755898	0	688
Sum Matches bp		Sum AlignLenght-->	19055
12592		NewCorrectedForAL	3.97804e-05
1127		TopEvalCorrectedForAL	4.58341e-05
725.004		Contig Size	18926
14444
14444	Rounded
Query 24	Hit/Subject Chromosome	%ID	AlignLength	Mismatches	Gaps	q-start	q-end	hit-start	hit-end	evalue	bitscore
s_1_1_contig56506	gi|224381689|ref|NC_011466.1|NC_011466	76.95	16676	2533	327	8665	24582	11016920	11033042	0	12450
s_1_1_contig56506	gi|224381689|ref|NC_011466.1|NC_011466	78.44	8525	1276	137	26	8248	11006950	11015214	0	6976
s_1_1_contig56506	gi|224381689|ref|NC_011466.1|NC_011466	80.32	2907	398	53	24620	27466	11033394	11036186	0	2581
s_1_1_contig56506	gi|224381689|ref|NC_011466.1|NC_011466	74.77	1990	325	49	27228	29109	11054897	11056817	0	1265
s_1_1_contig56506	gi|224381689|ref|NC_011466.1|NC_011466	71.27	811	147	15	29129	29903	11057038	11057798	1e-114	423
s_1_1_contig56506	gi|224381689|ref|NC_011466.1|NC_011466	73.37	567	101	15	30527	31055	11058717	11059271	1e-83	320
Sum Matches bp		Sum AlignLenght-->	31216
12832.2		NewCorrectedForAL	2.47076e-05
6687.01		TopEvalCorrectedForAL	4.61442e-05
2334.9		Contig Size	31329
1248.92	Overlap removed
557	Minor overlap removed
416.008
24076
24076	Rounded
Query 25	Hit/Subject Chromosome	%ID	AlignLength	Mismatches	Gaps	q-start	q-end	hit-start	hit-end	evalue	bitscore
s_1_1_contig72185	gi|224381679|ref|NC_011465.1|NC_011465	76.45	16564	2873	259	3088	19286	43681650	43665749	0	12050
s_1_1_contig72185	gi|224381679|ref|NC_011465.1|NC_011465	75.77	2167	411	36	34	2154	43685251	43683153	0	1481
s_1_1_contig72185	gi|224381679|ref|NC_011465.1|NC_011465	71.59	623	111	9	2360	2949	43682824	43682235	2e-91	345
s_1_1_contig72185	gi|224381679|ref|NC_011465.1|NC_011465	83.09	136	23	0	2958	3093	43681836	43681701	4e-30	141
Sum Matches bp		Sum AlignLenght-->	19484
12663.2		NewCorrectedForAL	3.91385e-05
1641.94		TopEvalCorrectedForAL	4.61543e-05
446.006		Contig Size	19415
107.002	Minor overlap removed.
14858.1
14858	Rounded
Query 26	Hit/Subject Chromosome	%ID	AlignLength	Mismatches	Gaps	q-start	q-end	hit-start	hit-end	evalue	bitscore
s_1_1_contig80338	gi|224381692|ref|NC_011469.1|NC_011469	78.69	17005	2489	279	1296	17826	14300267	14283923	0	14100
s_1_1_contig80338	gi|224381692|ref|NC_011469.1|NC_011469	80.3	4162	498	59	30422	34436	14272208	14268222	0	3833
s_1_1_contig80338	gi|224381692|ref|NC_011469.1|NC_011469	77.75	4310	678	75	18028	22211	14283847	14279693	0	3364
s_1_1_contig80338	gi|224381692|ref|NC_011469.1|NC_011469	76.05	4188	718	75	23929	27965	14278354	14274301	0	2949
s_1_1_contig80338	gi|224381692|ref|NC_011469.1|NC_011469	77.7	1664	262	26	28365	29960	14274298	14272676	0	1310
s_1_1_contig80338	gi|224381692|ref|NC_011469.1|NC_011469	76.62	1279	218	19	1	1244	14301600	14300368	0	946
s_1_1_contig80338	gi|224381692|ref|NC_011469.1|NC_011469	76.68	1278	233	20	22446	23719	14279591	14278375	0	930
s_1_1_contig80338	gi|224381692|ref|NC_011469.1|NC_011469	80.06	361	66	4	29998	30353	14272570	14272211	6e-82	315
Sum Matches bp		Sum AlignLenght-->	34247
13381.2		NewCorrectedForAL	2.2851e-05
3342.09		TopEvalCorrectedForAL	4.62746e-05
3351.03		Contig Size	34464
3184.97
1292.93
979.97
979.97
289.017
26801.2
26801	Rounded
Query 27	Hit/Subject Chromosome	%ID	AlignLength	Mismatches	Gaps	q-start	q-end	hit-start	hit-end	evalue	bitscore
s_1_1_contig55788	gi|224381680|ref|NC_011484.1|NC_011484	77.93	16791	2617	251	2226	18648	12361121	12345051	0	13430
s_1_1_contig55788	gi|224381680|ref|NC_011484.1|NC_011484	77.03	7082	1139	126	54283	61194	12314202	12307439	0	5308
s_1_1_contig55788	gi|224381680|ref|NC_011484.1|NC_011484	82.87	4723	656	45	47533	52209	12320071	12315456	0	4805
s_1_1_contig55788	gi|224381680|ref|NC_011484.1|NC_011484	78.49	3799	583	58	19724	23425	12344324	12340663	0	3117
s_1_1_contig55788	gi|224381680|ref|NC_011484.1|NC_011484	83.55	2760	349	26	29563	32264	12335390	12332678	0	2908
s_1_1_contig55788	gi|224381680|ref|NC_011484.1|NC_011484	78.27	2991	471	46	40173	43089	12327204	12324319	0	2417
s_1_1_contig55788	gi|224381680|ref|NC_011484.1|NC_011484	78.84	2599	382	45	43104	45649	12324378	12321895	0	2156
s_1_1_contig55788	gi|224381680|ref|NC_011484.1|NC_011484	78.64	2275	340	36	25588	27786	12338925	12336721	0	1882
s_1_1_contig55788	gi|224381680|ref|NC_011484.1|NC_011484	80.46	1929	295	29	34864	36764	12330284	12328410	0	1723
s_1_1_contig55788	gi|224381680|ref|NC_011484.1|NC_011484	80.52	1776	264	21	504	2221	12363027	12361276	0	1622
s_1_1_contig55788	gi|224381680|ref|NC_011484.1|NC_011484	80.66	1737	249	21	32916	34631	12332457	12330787	0	1602
s_1_1_contig55788	gi|224381680|ref|NC_011484.1|NC_011484	74.36	2079	343	41	61215	63161	12303414	12301394	0	1333
s_1_1_contig55788	gi|224381680|ref|NC_011484.1|NC_011484	82.03	1230	186	14	52307	53534	12315397	12314201	0	1191
s_1_1_contig55788	gi|224381680|ref|NC_011484.1|NC_011484	79.27	1158	159	16	23926	25050	12340260	12339151	0	1007
s_1_1_contig55788	gi|224381680|ref|NC_011484.1|NC_011484	81.28	1031	147	11	37900	38897	12328350	12327333	0	982
s_1_1_contig55788	gi|224381680|ref|NC_011484.1|NC_011484	76.01	1092	182	20	46003	47079	12321100	12320074	0	771
s_1_1_contig55788	gi|224381680|ref|NC_011484.1|NC_011484	74.58	1192	207	34	28178	29339	12336538	12335413	0	717
s_1_1_contig55788	gi|224381680|ref|NC_011484.1|NC_011484	77.33	547	99	8	18681	19223	12344870	12344345	2e-111	414
s_1_1_contig55788	gi|224381680|ref|NC_011484.1|NC_011484	77.91	326	57	5	165	475	12363512	12363187	9e-64	255
s_1_1_contig55788	gi|224381680|ref|NC_011484.1|NC_011484	79.6	201	29	3	23538	23738	12340664	12340476	7e-40	176
Sum Matches bp		Sum AlignLenght-->	57318
13085.2		NewCorrectedForAL	1.37492e-05
5455.26		TopEvalCorrectedForAL	4.64118e-05
3913.95		Contig Size	63772
2981.84
2305.98
2341.06
2049.05
1789.06
1552.07
1430.04
1401.06
1545.94
1008.97
917.947
837.997
830.029
888.994
422.995
253.987
159.996
45171.5
45171	Rounded
Query 28	Hit/Subject Chromosome	%ID	AlignLength	Mismatches	Gaps	q-start	q-end	hit-start	hit-end	evalue	bitscore
s_1_1_contig64161	gi|224381670|ref|NC_011477.1|NC_011477	77.06	16597	2409	294	3819	19803	4344243	4328433	0	12700
s_1_1_contig64161	gi|224381670|ref|NC_011477.1|NC_011477	81.17	3616	444	56	52	3544	4351517	4348016	0	3413
s_1_1_contig64161	gi|224381670|ref|NC_011477.1|NC_011477	77.52	2420	377	45	21249	23627	4328190	4325897	0	1860
s_1_1_contig64161	gi|224381670|ref|NC_011477.1|NC_011477	85	80	12	0	21168	21247	4328341	4328262	8e-15	91.5
s_1_1_contig64161	gi|224381670|ref|NC_011477.1|NC_011477	73.91	69	18	0	20604	20672	4328421	4328353	1.1	44.6
Sum Matches bp		Sum AlignLenght-->	22782
12789.6		NewCorrectedForAL	3.41413e-05
2935.11		TopEvalCorrectedForAL	4.64301e-05
1875.98		Contig Size	23680
68
50.9979
17719.7
17720	Rounded
Query 29	Hit/Subject Chromosome	%ID	AlignLength	Mismatches	Gaps	q-start	q-end	hit-start	hit-end	evalue	bitscore
s_1_1_contig69022	gi|224381679|ref|NC_011465.1|NC_011465	76.61	16448	2746	252	13661	29601	96638401	96622549	0	12170
s_1_1_contig69022	gi|224381679|ref|NC_011465.1|NC_011465	79.87	10931	1701	132	2920	13646	96649502	96638867	0	9649
s_1_1_contig69022	gi|224381679|ref|NC_011465.1|NC_011465	79.49	1053	148	13	17	1003	37142397	37143447	0	928
s_1_1_contig69022	gi|224381679|ref|NC_011465.1|NC_011465	78.85	52	5	1	2883	2934	152741827	152741782	0.39	46.4
s_1_1_contig69022	gi|224381666|ref|NC_011462.1|NC_011462	71.7	629	140	13	1092	1708	29267763	29267161	7e-80	307
Sum Matches bp		Sum AlignLenght-->	29098
12600.8		NewCorrectedForAL	2.67452e-05
8730.59		TopEvalCorrectedForAL	4.65771e-05
837.03		Contig Size	29608
26.002	Minor overlap removed
450.993
22645.4
22645	Rounded
Query 30	Hit/Subject Chromosome	%ID	AlignLength	Mismatches	Gaps	q-start	q-end	hit-start	hit-end	evalue	bitscore
s_1_1_contig108417	gi|224381692|ref|NC_011469.1|NC_011469	73.77	15786	2787	361	644	15866	14151429	14166423	0	9393
s_1_1_contig108417	gi|224381692|ref|NC_011469.1|NC_011469	77.88	113	23	2	83	195	14151199	14151309	8e-13	84.2
Sum Matches bp		Sum AlignLenght-->	15899
11645.3		NewCorrectedForAL	4.64162e-05
88.0044		TopEvalCorrectedForAL	4.67313e-05
11733.3		Contig Size	15868
11733	Rounded
Query 31	Hit/Subject Chromosome	%ID	AlignLength	Mismatches	Gaps	q-start	q-end	hit-start	hit-end	evalue	bitscore
s_1_1_contig95108	gi|224381679|ref|NC_011465.1|NC_011465	77.89	16609	2664	271	981	17132	51914628	51898571	0	13080
s_1_1_contig95108	gi|224381679|ref|NC_011465.1|NC_011465	78.38	1411	261	24	17408	18801	51898466	51897083	0	1101
s_1_1_contig95108	gi|224381679|ref|NC_011465.1|NC_011465	81.13	408	62	6	18790	19192	51897028	51896631	1e-100	376
s_1_1_contig95108	gi|224381679|ref|NC_011465.1|NC_011465	69.49	236	62	2	352	587	51915650	51915425	4e-18	102
Sum Matches bp		Sum AlignLenght-->	18652
12936.8		NewCorrectedForAL	4.17537e-05
1105.94		TopEvalCorrectedForAL	4.68963e-05
319.01	Minor overlap removed	Contig Size	19228
163.996
14525.7
14526	Rounded
Query 32	Hit/Subject Chromosome	%ID	AlignLength	Mismatches	Gaps	q-start	q-end	hit-start	hit-end	evalue	bitscore
s_1_1_contig66135	gi|224381695|ref|NC_011472.1|NC_011472	78.2	16598	2529	236	16832	33003	19856216	19840282	0	13540
s_1_1_contig66135	gi|224381695|ref|NC_011472.1|NC_011472	75.47	12994	2191	250	4115	16697	19868632	19856224	0	8835
s_1_1_contig66135	gi|224381695|ref|NC_011472.1|NC_011472	81.26	4589	667	59	40224	44759	19833397	19828949	0	4307
s_1_1_contig66135	gi|224381695|ref|NC_011472.1|NC_011472	79.56	3650	579	52	33325	36913	19840268	19836725	0	3135
s_1_1_contig66135	gi|224381695|ref|NC_011472.1|NC_011472	76.74	3211	474	65	37025	40142	19836725	19833695	0	2376
s_1_1_contig66135	gi|224381695|ref|NC_011472.1|NC_011472	75.61	2087	381	32	116	2127	19873471	19871438	0	1440
s_1_1_contig66135	gi|224381695|ref|NC_011472.1|NC_011472	79.62	1531	229	30	44751	46239	19828628	19827139	0	1294
s_1_1_contig66135	gi|224381695|ref|NC_011472.1|NC_011472	75.99	1287	237	21	2301	3537	19871227	19869963	0	899
s_1_1_contig66135	gi|224381695|ref|NC_011472.1|NC_011472	70.21	658	115	15	3525	4110	19868880	19869528	3e-80	309
		Sum AlignLenght-->	46596
Sum Matches bp		NewCorrectedForAL	1.66319e-05
12979.6		TopEvalCorrectedForAL	4.71141e-05
9806.57		Contig Size	46281
3729.02
2903.94
2464.12
1577.98
1209.98	Minor overlap removed
977.991
461.982
36111.2
36111	Rounded
Query 33	Hit/Subject Chromosome	%ID	AlignLength	Mismatches	Gaps	q-start	q-end	hit-start	hit-end	evalue	bitscore
s_1_1_contig73796	gi|224381679|ref|NC_011465.1|NC_011465	74.7	15829	2760	284	297	15561	32096484	32081336	0	10340
s_1_1_contig73796	gi|224381679|ref|NC_011465.1|NC_011465	72.9	3506	692	69	21834	25223	32074385	32071022	0	1961
s_1_1_contig73796	gi|224381679|ref|NC_011465.1|NC_011465	74.79	2539	484	43	15646	18072	32081320	32078826	0	1640
s_1_1_contig73796	gi|224381679|ref|NC_011465.1|NC_011465	71.34	3001	565	58	18128	20911	32078680	32075758	0	1539
s_1_1_contig73796	gi|224381679|ref|NC_011465.1|NC_011465	76.57	606	119	12	21215	21801	133105420	133106021	1e-113	419
Sum Matches bp		Sum AlignLenght-->	25481
11824.3		NewCorrectedForAL	2.90845e-05
2555.87		TopEvalCorrectedForAL	4.71919e-05
1898.92		Contig Size	25250
2140.91
464.014
18884
18884	Rounded
Query 34	Hit/Subject Chromosome	%ID	AlignLength	Mismatches	Gaps	q-start	q-end	hit-start	hit-end	evalue	bitscore
s_1_1_contig63042	gi|224381667|ref|NC_011474.1|NC_011474	79.85	16901	2499	265	5501	21970	9753227	9769652	0	14750
s_1_1_contig63042	gi|224381667|ref|NC_011474.1|NC_011474	79.06	4867	737	73	1	4769	9748529	9753211	0	4109
s_1_1_contig63042	gi|224381667|ref|NC_011474.1|NC_011474	67.21	305	60	12	4932	5219	5767824	5768105	4e-12	82.4
Sum Matches bp		Sum AlignLenght-->	22073
13495.4		NewCorrectedForAL	3.60168e-05
3847.85		TopEvalCorrectedForAL	4.72457e-05
204.99		Contig Size	21979
17548.3
17548	Rounded
Query 35	Hit/Subject Chromosome	%ID	AlignLength	Mismatches	Gaps	q-start	q-end	hit-start	hit-end	evalue	bitscore
s_1_1_contig63562	gi|224381672|ref|NC_011479.1|NC_011479	78.51	16600	2382	310	23	16151	11244508	11228624	0	13520
s_1_1_contig63562	gi|224381672|ref|NC_011479.1|NC_011479	76.48	5634	798	111	20349	25864	11224599	11219375	0	4161
s_1_1_contig63562	gi|224381672|ref|NC_011479.1|NC_011479	75.07	3001	527	60	17344	20268	11227463	11224608	0	1968
s_1_1_contig63562	gi|224381672|ref|NC_011479.1|NC_011479	81.27	1084	159	14	16281	17339	11228615	11227551	0	1016
Sum Matches bp		Sum AlignLenght-->	26319
13032.7		NewCorrectedForAL	2.95587e-05
4308.88		TopEvalCorrectedForAL	4.72952e-05
2252.85		Contig Size	25877
880.967
20475.4
20475	Rounded
Query 36	Hit/Subject Chromosome	%ID	AlignLength	Mismatches	Gaps	q-start	q-end	hit-start	hit-end	evalue	bitscore
s_1_1_contig63319	gi|224381694|ref|NC_011471.1|NC_011471	80.86	17038	2228	243	6378	22855	20711452	20728016	0	15860
s_1_1_contig63319	gi|224381694|ref|NC_011471.1|NC_011471	78.33	10358	1517	190	37352	47341	20743012	20753009	0	8358
s_1_1_contig63319	gi|224381694|ref|NC_011471.1|NC_011471	81.24	5843	791	97	47403	53091	20753013	20758704	0	5434
s_1_1_contig63319	gi|224381694|ref|NC_011471.1|NC_011471	78.21	5153	758	96	29201	34157	20734610	20739593	0	4127
s_1_1_contig63319	gi|224381694|ref|NC_011471.1|NC_011471	77.52	4559	708	86	22989	27416	20728211	20732583	0	3499
s_1_1_contig63319	gi|224381694|ref|NC_011471.1|NC_011471	81.44	3270	472	36	52	3258	20697148	20700345	0	3121
s_1_1_contig63319	gi|224381694|ref|NC_011471.1|NC_011471	76.48	3721	579	81	56072	59654	20761441	20765003	0	2668
s_1_1_contig63319	gi|224381694|ref|NC_011471.1|NC_011471	75.33	3210	537	61	34189	37240	20739856	20742968	0	2174
s_1_1_contig63319	gi|224381694|ref|NC_011471.1|NC_011471	77.17	2764	448	45	61285	63959	20766019	20768688	0	2102
s_1_1_contig63319	gi|224381694|ref|NC_011471.1|NC_011471	76.63	2490	411	44	53482	55872	20758934	20761351	0	1822
s_1_1_contig63319	gi|224381694|ref|NC_011471.1|NC_011471	75.78	2031	308	38	66023	67955	20772049	20773993	0	1440
s_1_1_contig63319	gi|224381694|ref|NC_011471.1|NC_011471	79.33	1664	242	27	64073	65676	20768703	20770324	0	1420
s_1_1_contig63319	gi|224381694|ref|NC_011471.1|NC_011471	75.98	1869	256	29	27499	29198	20732584	20734428	0	1389
s_1_1_contig63319	gi|224381694|ref|NC_011471.1|NC_011471	73.87	1630	252	31	4618	6188	20701761	20703275	0	1036
s_1_1_contig63319	gi|224381694|ref|NC_011471.1|NC_011471	78.94	902	153	13	3282	4162	20700689	20701574	0	746
s_1_1_contig63319	gi|224381694|ref|NC_011471.1|NC_011471	69.94	1457	290	37	75052	76440	20788017	20789393	2e-173	619
s_1_1_contig63319	gi|224381694|ref|NC_011471.1|NC_011471	74.44	935	203	15	76612	77536	20789400	20790308	9e-160	574
s_1_1_contig63319	gi|224381694|ref|NC_011471.1|NC_011471	79.69	650	85	11	65908	66535	20770600	20771224	1e-158	571
s_1_1_contig63319	gi|224381694|ref|NC_011471.1|NC_011471	70.06	805	177	14	59664	60426	20765105	20765887	4e-95	360
s_1_1_contig63319	gi|224381694|ref|NC_011471.1|NC_011471	72.55	561	117	12	74226	74776	23682039	23682572	4e-76	297
s_1_1_contig63319	gi|224381694|ref|NC_011471.1|NC_011471	74.78	226	47	2	67970	68195	20774392	20774607	3e-32	150
s_1_1_contig63319	gi|224381694|ref|NC_011471.1|NC_011471	72.63	285	62	8	77677	77951	20790315	20790593	2e-29	141
s_1_1_contig63319	gi|224381694|ref|NC_011471.1|NC_011471	77.39	115	25	1	78354	78467	14241533	14241419	3e-13	87.8
Sum Matches bp		Sum AlignLenght-->	71023
13776.9		NewCorrectedForAL	1.10068e-05
8113.42		TopEvalCorrectedForAL	4.74586e-05
4746.85		Contig Size	78467
4030.16
3534.14
2663.09
2845.82
2418.09
2132.98
1908.09
1539.09
1320.05
1420.07
1204.08
712.039
1019.03
696.014
4.985	Overlap removed
563.983
407.005
169.003
206.995
88.9985
55520.9
55521	Rounded
Query 37	Hit/Subject Chromosome	%ID	AlignLength	Mismatches	Gaps	q-start	q-end	hit-start	hit-end	evalue	bitscore
s_1_1_contig75634	gi|224381694|ref|NC_011471.1|NC_011471	79	16640	2382	268	9232	25264	22663338	22647205	0	14050
s_1_1_contig75634	gi|224381694|ref|NC_011471.1|NC_011471	78.01	4985	736	81	928	5797	22671522	22666783	0	4008
s_1_1_contig75634	gi|224381694|ref|NC_011471.1|NC_011471	80.94	2566	393	36	5802	8320	22666636	22664120	0	2347
s_1_1_contig75634	gi|224381694|ref|NC_011471.1|NC_011471	73.95	741	127	14	8388	9108	22664106	22663412	1e-126	462
Sum Matches bp		Sum AlignLenght-->	24932
13145.6		NewCorrectedForAL	3.16262e-05
3888.8		TopEvalCorrectedForAL	4.7476e-05
2076.92		Contig Size	25330
547.97
19659.3
19659	Rounded
Query 38	Hit/Subject Chromosome	%ID	AlignLength	Mismatches	Gaps	q-start	q-end	hit-start	hit-end	evalue	bitscore
s_1_1_contig84513	gi|224381666|ref|NC_011462.1|NC_011462	74.96	15784	2544	324	19	15234	95905994	95920936	0	10450
s_1_1_contig84513	gi|224381666|ref|NC_011462.1|NC_011462	73.8	2347	413	47	15291	17520	95920934	95923195	0	1431
Sum Matches bp		Sum AlignLenght-->	18131
11831.7		NewCorrectedForAL	4.12614e-05
1732.09		TopEvalCorrectedForAL	4.74911e-05
13563.8		Contig Size	17547
13564	Rounded
Query 39	Hit/Subject Chromosome	%ID	AlignLength	Mismatches	Gaps	q-start	q-end	hit-start	hit-end	evalue	bitscore
s_1_1_contig56770	gi|224381675|ref|NC_011482.1|NC_011482	79.3	16663	2382	246	12177	28334	10720469	10704370	0	14350
s_1_1_contig56770	gi|224381675|ref|NC_011482.1|NC_011482	78.13	7260	1102	131	4036	11024	10729272	10722228	0	5781
s_1_1_contig56770	gi|224381675|ref|NC_011482.1|NC_011482	76.9	2706	443	46	28671	31282	10704002	10701385	0	2019
s_1_1_contig56770	gi|224381675|ref|NC_011482.1|NC_011482	73.19	3290	546	80	493	3641	10732369	10729275	0	1900
s_1_1_contig56770	gi|224381675|ref|NC_011482.1|NC_011482	77.92	2056	310	38	31285	33291	10700460	10698500	0	1620
s_1_1_contig56770	gi|224381675|ref|NC_011482.1|NC_011482	77.97	1153	202	17	11066	12177	10722043	10720902	0	904
Sum Matches bp		Sum AlignLenght-->	33127
13213.8		NewCorrectedForAL	2.35785e-05
5672.24		TopEvalCorrectedForAL	4.75905e-05
2080.91		Contig Size	34012
2407.95
1602.04
897.994
25874.9
25875	Rounded
Query 40	Hit/Subject Chromosome	%ID	AlignLength	Mismatches	Gaps	q-start	q-end	hit-start	hit-end	evalue	bitscore
s_1_1_contig78419	gi|224381679|ref|NC_011465.1|NC_011465	77.27	16216	2649	241	10650	26268	42455619	42471394	0	12480
s_1_1_contig78419	gi|224381679|ref|NC_011465.1|NC_011465	78.47	7120	1138	108	14	7002	42445340	42452195	0	5799
s_1_1_contig78419	gi|224381679|ref|NC_011465.1|NC_011465	74.17	1591	329	32	7206	8752	42452199	42453751	0	946
s_1_1_contig78419	gi|224381679|ref|NC_011465.1|NC_011465	72.53	1387	267	22	9127	10438	42453758	42455105	0	787
s_1_1_contig78419	gi|224381679|ref|NC_011465.1|NC_011465	75.61	123	30	0	10483	10605	42455408	42455530	1e-13	87.8
Sum Matches bp		Sum AlignLenght-->	26437
12530.1		NewCorrectedForAL	2.91824e-05
5587.06		TopEvalCorrectedForAL	4.76505e-05
1180.04		Contig Size	26313
1005.99
93.0003
20396.2
20396	Rounded
Query 41	Hit/Subject Chromosome	%ID	AlignLength	Mismatches	Gaps	q-start	q-end	hit-start	hit-end	evalue	bitscore
s_1_1_contig51649	gi|224381694|ref|NC_011471.1|NC_011471	77.88	16319	2650	241	15631	31498	22775510	22759700	0	12940
s_1_1_contig51649	gi|224381694|ref|NC_011471.1|NC_011471	76.73	5826	889	128	31895	37518	22757668	22752108	0	4237
s_1_1_contig51649	gi|224381694|ref|NC_011471.1|NC_011471	81.23	3698	446	61	2380	5994	22785475	22781943	0	3489
s_1_1_contig51649	gi|224381694|ref|NC_011471.1|NC_011471	80.08	2435	331	33	11547	13934	22779180	22776853	0	2195
s_1_1_contig51649	gi|224381694|ref|NC_011471.1|NC_011471	73.75	3238	591	71	39050	42168	22750836	22747739	0	1921
s_1_1_contig51649	gi|224381694|ref|NC_011471.1|NC_011471	70.52	2829	525	56	6951	9627	22781888	22779217	0	1368
s_1_1_contig51649	gi|224381694|ref|NC_011471.1|NC_011471	72.17	2415	425	52	44457	46737	22745127	22742826	0	1314
s_1_1_contig51649	gi|224381694|ref|NC_011471.1|NC_011471	76.93	1569	285	25	15	1549	22787820	22786295	0	1155
s_1_1_contig51649	gi|224381694|ref|NC_011471.1|NC_011471	76.03	1264	219	26	14385	15625	22776851	22775649	0	872
s_1_1_contig51649	gi|224381694|ref|NC_011471.1|NC_011471	82.84	839	92	13	42365	43199	22747733	22746943	0	852
s_1_1_contig51649	gi|224381694|ref|NC_011471.1|NC_011471	70.22	1246	222	34	47686	48879	22742766	22741618	2e-154	556
s_1_1_contig51649	gi|224381694|ref|NC_011471.1|NC_011471	72.61	920	185	21	37535	38422	22751718	22750834	2e-134	489
s_1_1_contig51649	gi|224381694|ref|NC_011471.1|NC_011471	72.66	779	163	20	48948	49713	22740790	22740049	3e-107	399
s_1_1_contig51649	gi|224381694|ref|NC_011471.1|NC_011471	76.38	508	103	7	1709	2199	22786272	22785765	2e-95	360
s_1_1_contig51649	gi|224381694|ref|NC_011471.1|NC_011471	71.67	720	137	19	43621	44323	22746504	22745835	1e-93	354
s_1_1_contig51649	gi|224381694|ref|NC_011471.1|NC_011471	68.1	279	76	7	31571	31846	22758146	22757878	9e-12	82.4
Sum Matches bp		Sum AlignLenght-->	44884
12709.2		NewCorrectedForAL	1.70383e-05
4470.29		TopEvalCorrectedForAL	4.77235e-05
3003.89		Contig Size	49815
1949.95
2388.03
1995.01
1742.91
1207.03
961.019
695.028
874.941
668.012
566.021
388.01
516.024
189.999
34325.4
34325	Rounded
Query 42	Hit/Subject Chromosome	%ID	AlignLength	Mismatches	Gaps	q-start	q-end	hit-start	hit-end	evalue	bitscore
s_1_1_contig67753	gi|224381693|ref|NC_011470.1|NC_011470	79.79	16698	2381	240	20828	37084	16117697	16133841	0	14710
s_1_1_contig67753	gi|224381693|ref|NC_011470.1|NC_011470	79.9	12030	1679	169	2745	14454	16099979	16111589	0	10700
s_1_1_contig67753	gi|224381693|ref|NC_011470.1|NC_011470	83.17	2615	360	34	14788	17375	16111713	16114274	0	2652
s_1_1_contig67753	gi|224381693|ref|NC_011470.1|NC_011470	85.19	2337	240	34	18480	20759	16115407	16117694	0	2598
s_1_1_contig67753	gi|224381693|ref|NC_011470.1|NC_011470	83.17	939	116	15	17396	18325	16114479	16115384	0	951
s_1_1_contig67753	gi|224381693|ref|NC_011470.1|NC_011470	80.79	760	100	17	1	747	16098427	16099153	0	677
s_1_1_contig67753	gi|224381693|ref|NC_011470.1|NC_011470	75.15	507	95	8	1933	2430	16099170	16099654	6e-89	338
s_1_1_contig67753	gi|224381693|ref|NC_011470.1|NC_011470	81.17	154	25	4	2483	2633	16099827	16099979	4e-27	132
Sum Matches bp		Sum AlignLenght-->	36040
13323.3		NewCorrectedForAL	2.23284e-05
9611.97		TopEvalCorrectedForAL	4.77842e-05
2174.9		Contig Size	37118
1990.89
780.966
614.004
381.011
125.002
29002.1
29002	Rounded
Query 43	Hit/Subject Chromosome	%ID	AlignLength	Mismatches	Gaps	q-start	q-end	hit-start	hit-end	evalue	bitscore
s_1_1_contig64021	gi|224381672|ref|NC_011479.1|NC_011479	77.21	16114	2418	301	517	16123	8714621	8729986	0	12280
s_1_1_contig64021	gi|224381672|ref|NC_011479.1|NC_011479	76.3	8553	1328	148	16420	24492	8729998	8738331	0	6249
s_1_1_contig64021	gi|224381672|ref|NC_011479.1|NC_011479	78.13	3206	456	56	31061	34126	8744193	8747293	0	2590
s_1_1_contig64021	gi|224381672|ref|NC_011479.1|NC_011479	79.1	1287	179	24	25994	27230	8740276	8741522	0	1081
s_1_1_contig64021	gi|224381672|ref|NC_011479.1|NC_011479	76.03	1268	246	22	28330	29563	8741527	8742770	0	870
s_1_1_contig64021	gi|224381672|ref|NC_011479.1|NC_011479	78.34	688	124	9	29334	29999	8743434	8744118	4e-153	551
s_1_1_contig64021	gi|224381672|ref|NC_011479.1|NC_011479	81.98	344	40	10	172	494	8714094	8714436	2e-82	316
Sum Matches bp		Sum AlignLenght-->	31230
12441.6		NewCorrectedForAL	2.46536e-05
6525.94		TopEvalCorrectedForAL	4.79149e-05
2504.85		Contig Size	34129
1018.02
964.06
308.979	Overlap removed
282.011
24045.5
24045	Rounded
Query 44	Hit/Subject Chromosome	%ID	AlignLength	Mismatches	Gaps	q-start	q-end	hit-start	hit-end	evalue	bitscore
s_1_1_contig75156	gi|224381672|ref|NC_011479.1|NC_011479	78.59	16386	2536	270	24	16058	8445476	8461240	0	13390
s_1_1_contig75156	gi|224381672|ref|NC_011479.1|NC_011479	81.14	1983	307	27	16361	18299	8462232	8464191	0	1829
Sum Matches bp		Sum AlignLenght-->	18369
12877.8		NewCorrectedForAL	4.29346e-05
1609.01		TopEvalCorrectedForAL	4.79617e-05
14486.8		Contig Size	18335
14487
Query 45	Hit/Subject Chromosome	%ID	AlignLength	Mismatches	Gaps	q-start	q-end	hit-start	hit-end	evalue	bitscore
s_1_1_contig64218	gi|224381693|ref|NC_011470.1|NC_011470	78.83	16428	2458	246	1596	17490	25936084	25920143	0	13760
s_1_1_contig64218	gi|224381693|ref|NC_011470.1|NC_011470	79.43	2256	354	27	22622	24826	25915972	25913776	0	1954
s_1_1_contig64218	gi|224381693|ref|NC_011470.1|NC_011470	76.57	2224	346	38	20420	22534	25918115	25915958	0	1649
s_1_1_contig64218	gi|224381693|ref|NC_011470.1|NC_011470	82.61	1599	178	22	1	1580	25937742	25936225	0	1622
s_1_1_contig64218	gi|224381693|ref|NC_011470.1|NC_011470	80.75	748	106	14	17710	18437	25919918	25919189	0	672
s_1_1_contig64218	gi|224381693|ref|NC_011470.1|NC_011470	77.38	809	147	12	19190	19974	25918905	25918109	1e-171	612
s_1_1_contig64218	gi|224381693|ref|NC_011470.1|NC_011470	77.06	109	24	1	18781	18889	25919017	25918910	2e-11	80.6
s_1_1_contig64218	gi|224381693|ref|NC_011470.1|NC_011470	74.26	101	22	2	17525	17622	25920016	25919917	1e-05	60.8
Sum Matches bp		Sum AlignLenght-->	24274
12950.2		NewCorrectedForAL	3.25087e-05
1791.94		TopEvalCorrectedForAL	4.79851e-05
1702.92		Contig Size	24826
1320.93
604.01
626.004
83.9954
75.0026
19155
19155
Query 46	Hit/Subject Chromosome	%ID	AlignLength	Mismatches	Gaps	q-start	q-end	hit-start	hit-end	evalue	bitscore
s_1_1_contig82707	gi|224381696|ref|NC_011473.1|NC_011473	75.49	15727	2595	338	4580	19613	16235529	16220370	0	10590
s_1_1_contig82707	gi|224381696|ref|NC_011473.1|NC_011473	75.18	8162	1381	155	33638	41488	16204516	16196689	0	5469
s_1_1_contig82707	gi|224381696|ref|NC_011473.1|NC_011473	75.67	4287	807	75	19741	23922	16220358	16216203	0	2904
s_1_1_contig82707	gi|224381696|ref|NC_011473.1|NC_011473	76.99	3338	530	60	25731	28998	16213675	16210506	0	2502
s_1_1_contig82707	gi|224381696|ref|NC_011473.1|NC_011473	77.36	3237	564	55	30	3189	16240280	16237136	0	2437
s_1_1_contig82707	gi|224381696|ref|NC_011473.1|NC_011473	80.65	1995	292	27	29007	30942	16210174	16208215	0	1820
s_1_1_contig82707	gi|224381696|ref|NC_011473.1|NC_011473	76.21	1627	277	38	32053	33636	16206373	16204814	0	1117
s_1_1_contig82707	gi|224381696|ref|NC_011473.1|NC_011473	77.36	1219	239	14	24224	25432	16216156	16214965	0	924
s_1_1_contig82707	gi|224381696|ref|NC_011473.1|NC_011473	73.07	1389	267	33	3207	4568	16236911	16235603	0	767
s_1_1_contig82707	gi|224381696|ref|NC_011473.1|NC_011473	71.33	757	148	17	31237	31972	16208087	16207379	3e-99	372
s_1_1_contig82707	gi|224381696|ref|NC_011473.1|NC_011473	70.72	362	74	10	25442	25786	16214470	16214124	3e-35	159
Sum Matches bp		Sum AlignLenght-->	42044
11872.3		NewCorrectedForAL	1.80308e-05
6136.19		TopEvalCorrectedForAL	4.80003e-05
3243.97		Contig Size	41496
2569.93
2504.14
1608.97
1239.94
943.018
1014.94
539.968
200.006	Overlap removed
31873.4
31873	Rounded
Query 47	Hit/Subject Chromosome	%ID	AlignLength	Mismatches	Gaps	q-start	q-end	hit-start	hit-end	evalue	bitscore
s_1_1_contig68180	gi|224381679|ref|NC_011465.1|NC_011465	74.42	15475	2887	260	1	14867	146257276	146272287	0	9856
s_1_1_contig68180	gi|224381679|ref|NC_011465.1|NC_011465	75.04	8446	1549	147	14865	23084	146272486	146280598	0	5570
s_1_1_contig68180	gi|224381679|ref|NC_011465.1|NC_011465	73.98	4488	760	105	23991	28265	146281668	146285960	0	2722
s_1_1_contig68180	gi|224381679|ref|NC_011465.1|NC_011465	80.68	264	38	5	23179	23437	146280602	146280857	4e-58	235
s_1_1_contig68180	gi|224381679|ref|NC_011465.1|NC_011465	71.09	256	53	5	23458	23700	146280937	146281184	5e-25	125
Sum Matches bp		Sum AlignLenght-->	28929
11516.5		NewCorrectedForAL	2.57705e-05
6334.88	Overlap removed	TopEvalCorrectedForAL	4.80905e-05
3320.22		Contig Size	28265
212.995
181.99
21566.6
21567	Rounded
Query 48	Hit/Subject Chromosome	%ID	AlignLength	Mismatches	Gaps	q-start	q-end	hit-start	hit-end	evalue	bitscore
s_1_1_contig72837	gi|224381690|ref|NC_011467.1|NC_011467	76.68	15910	2539	297	3372	18862	25164657	25179814	0	11680
s_1_1_contig72837	gi|224381690|ref|NC_011467.1|NC_011467	72.27	2510	467	60	164	2594	25157964	25160323	0	1324
Sum Matches bp		Sum AlignLenght-->	18420
12199.8		NewCorrectedForAL	4.13031e-05
1813.98		TopEvalCorrectedForAL	4.81961e-05
14013.8		Contig Size	18927
14014	Rounded
Query 49	Hit/Subject Chromosome	%ID	AlignLength	Mismatches	Gaps	q-start	q-end	hit-start	hit-end	evalue	bitscore
s_1_1_contig60853	gi|224381694|ref|NC_011471.1|NC_011471	77	15959	2543	301	1	15364	6109591	6094166	0	11890
s_1_1_contig60853	gi|224381694|ref|NC_011471.1|NC_011471	82.12	330	40	6	15780	16105	6094072	6093758	6e-84	320
Sum Matches bp		Sum AlignLenght-->	16289
12288.4		NewCorrectedForAL	4.73332e-05
270.996		TopEvalCorrectedForAL	4.82486e-05
12559.4		Contig Size	16141
12559	Rounded
Query 50	Hit/Subject Chromosome	%ID	AlignLength	Mismatches	Gaps	q-start	q-end	hit-start	hit-end	evalue	bitscore
s_1_1_contig80389	gi|224381666|ref|NC_011462.1|NC_011462	80.23	16561	2523	215	12227	28532	28710613	28726677	0	14810
s_1_1_contig80389	gi|224381666|ref|NC_011462.1|NC_011462	80.2	6107	859	78	5	5931	28697155	28703091	0	5526
s_1_1_contig80389	gi|224381666|ref|NC_011462.1|NC_011462	79.63	5807	906	76	5334	11013	28703547	28709203	0	5047
s_1_1_contig80389	gi|224381666|ref|NC_011462.1|NC_011462	75.44	1771	337	31	28610	30339	28726694	28728407	0	1182
s_1_1_contig80389	gi|224381666|ref|NC_011462.1|NC_011462	73.11	1402	282	32	30412	31741	28728537	28729915	0	771
s_1_1_contig80389	gi|224381666|ref|NC_011462.1|NC_011462	75.96	757	115	15	11238	11971	28709198	28709910	3e-149	538
Sum Matches bp		Sum AlignLenght-->	31807
13286.9		NewCorrectedForAL	2.48565e-05
4897.81		TopEvalCorrectedForAL	4.84451e-05
4026.11	Overlap removed	Contig Size	31753
1336.04
1025
575.017
25146.9
25147	Rounded
Query 51	Hit/Subject Chromosome	%ID	AlignLength	Mismatches	Gaps	q-start	q-end	hit-start	hit-end	evalue	bitscore
s_1_1_contig70772	gi|224381692|ref|NC_011469.1|NC_011469	77.83	15966	2440	263	15770	31188	37877522	37862110	0	12640
s_1_1_contig70772	gi|224381692|ref|NC_011469.1|NC_011469	77.27	4884	775	72	31191	35998	37861555	37856931	0	3781
s_1_1_contig70772	gi|224381692|ref|NC_011469.1|NC_011469	77.57	4855	790	88	10340	15067	37882225	37877543	0	3719
s_1_1_contig70772	gi|224381692|ref|NC_011469.1|NC_011469	78.66	3243	482	53	85	3223	37892935	37889799	0	2679
s_1_1_contig70772	gi|224381692|ref|NC_011469.1|NC_011469	76.35	2161	381	40	36000	38085	37856380	37854275	0	1530
s_1_1_contig70772	gi|224381692|ref|NC_011469.1|NC_011469	73.68	2508	447	52	3550	5905	37889482	37887036	0	1505
s_1_1_contig70772	gi|224381692|ref|NC_011469.1|NC_011469	80.03	1532	230	22	7794	9267	37884751	37883238	0	1353
s_1_1_contig70772	gi|224381692|ref|NC_011469.1|NC_011469	76.07	1120	202	24	5902	6967	37886970	37885863	0	764
s_1_1_contig70772	gi|224381692|ref|NC_011469.1|NC_011469	76.01	371	65	5	9705	10073	37882716	37882368	1e-67	268
s_1_1_contig70772	gi|224381692|ref|NC_011469.1|NC_011469	69.52	561	117	18	7000	7544	37885687	37885165	8e-50	208
s_1_1_contig70772	gi|224381692|ref|NC_011469.1|NC_011469	70.68	365	72	5	9299	9635	37883077	37882720	9e-43	185
s_1_1_contig70772	gi|224381692|ref|NC_011469.1|NC_011469	64.5	338	65	9	38966	39249	47222673	47222337	1e-10	78.8
Sum Matches bp		Sum AlignLenght-->	37900
12426.3		NewCorrectedForAL	2.03542e-05
3773.87		TopEvalCorrectedForAL	4.87473e-05
3766.02		Contig Size	44457
2550.94
1649.92
1847.89
1226.06
847.984
281.997
390.007
257.982
218.01
29237
29237	Rounded
Query 52	Hit/Subject Chromosome	%ID	AlignLength	Mismatches	Gaps	q-start	q-end	hit-start	hit-end	evalue	bitscore
s_1_1_contig81772	gi|224381679|ref|NC_011465.1|NC_011465	76.18	15593	2409	251	46	14819	63106999	63122105	0	11420
s_1_1_contig81772	gi|224381679|ref|NC_011465.1|NC_011465	73.65	683	122	18	14921	15551	63122446	63123122	1e-105	392
Sum Matches bp		Sum AlignLenght-->	16276
11878.7		NewCorrectedForAL	4.67407e-05
503.03		TopEvalCorrectedForAL	4.88553e-05
12381.8		Contig Size	15574
12382	Rounded
Query 53	Hit/Subject Chromosome	%ID	AlignLength	Mismatches	Gaps	q-start	q-end	hit-start	hit-end	evalue	bitscore
s_1_1_contig92325	gi|224381680|ref|NC_011484.1|NC_011484	75.54	15399	2542	300	8	14861	7033194	7047912	0	10540
s_1_1_contig92325	gi|224381680|ref|NC_011484.1|NC_011484	72.06	680	147	14	15402	16061	7052295	7052951	2e-91	345
Sum Matches bp		Sum AlignLenght-->	16079
11632.4		NewCorrectedForAL	4.68874e-05
490.008		TopEvalCorrectedForAL	4.90551e-05
12122.4		Contig Size	16769
12122
Query 54	Hit/Subject Chromosome	%ID	AlignLength	Mismatches	Gaps	q-start	q-end	hit-start	hit-end	evalue	bitscore
s_1_1_contig82706	gi|224381677|ref|NC_011463.1|NC_011463	75.29	15345	2570	290	76	14814	30302262	30287534	0	10370
s_1_1_contig82706	gi|224381677|ref|NC_011463.1|NC_011463	76.58	3552	593	64	18054	21492	30284207	30280782	0	2581
s_1_1_contig82706	gi|224381677|ref|NC_011463.1|NC_011463	76.29	2210	396	46	21354	23498	30280415	30278269	0	1532
s_1_1_contig82706	gi|224381677|ref|NC_011463.1|NC_011463	77.19	1929	296	29	15870	17686	30286165	30284269	0	1494
Sum Matches bp		Sum AlignLenght-->	22897
11553.3		NewCorrectedForAL	3.3016e-05
2720.12		TopEvalCorrectedForAL	4.90648e-05
1547.01	Overlap removed	Contig Size	23529
1489
17309.4
Query 55	Hit/Subject Chromosome	%ID	AlignLength	Mismatches	Gaps	q-start	q-end	hit-start	hit-end	evalue	bitscore
s_1_1_contig68290	gi|224381689|ref|NC_011466.1|NC_011466	76.21	15419	2518	271	6409	21303	7637753	7652545	0	11080
s_1_1_contig68290	gi|224381689|ref|NC_011466.1|NC_011466	81.61	4366	468	68	2173	6390	7633446	7637624	0	4250
s_1_1_contig68290	gi|224381689|ref|NC_011466.1|NC_011466	85.33	2127	244	24	16	2102	7631354	7633452	0	2383
s_1_1_contig68290	gi|224381689|ref|NC_011466.1|NC_011466	74.85	1193	191	28	22742	23888	7653268	7654397	0	771
s_1_1_contig68290	gi|224381689|ref|NC_011466.1|NC_011466	74.79	595	99	14	21612	22164	7652580	7653165	1e-101	379
Sum Matches bp		Sum AlignLenght-->	23700
11750.8		NewCorrectedForAL	3.28776e-05
3563.09		TopEvalCorrectedForAL	4.9426e-05
1814.97		Contig Size	23905
892.96
445
18466.8
18467	Rounded
Query 56	Hit/Subject Chromosome	%ID	AlignLength	Mismatches	Gaps	q-start	q-end	hit-start	hit-end	evalue	bitscore
s_1_1_contig93935	gi|224381690|ref|NC_011467.1|NC_011467	81.26	16412	2276	216	49	16105	55793497	55777531	0	15480
s_1_1_contig93935	gi|224381690|ref|NC_011467.1|NC_011467	79.39	2542	383	48	16391	18867	55777465	55775000	0	2132
Sum Matches bp		Sum AlignLenght-->	18954
13336.4		NewCorrectedForAL	4.27386e-05
2018.09		TopEvalCorrectedForAL	4.95126e-05
15354.5		Contig Size	18891
15354
