# Supplementary material for: A Multi-Platform Draft de novo Genome Assembly and Comparative Analysis for the Scarlet Macaw (Ara macao)
Source: PLoS One. 2013 May 8;8(5):e62415. doi: 10.1371/journal.pone.0062415 (PMC3648530; doi:10.1371/journal.pone.0062415)
Supplement: Table S16 — Example of running sum method for quality trimming. (XLS) [file pone.0062415.s017.xls]

## Sheet: TableS12
	Table S16 Running	Sum Method Example
		Limit →	0.05
5'	Phred score (Q)	p = (10^(Q / -10)	Limit – p	Running sum of column D, but when sum < 0, set sum to 0	Start position (First positive value)	End position (Maximum value in Column E)
G	4	0.398107	-0.348107	0
T	8	0.158489	-0.108489	0
G	15	0.0316228	0.0183772	0.0183772	Start valid region
C	30	0.001	0.049	0.0673772
A	32	0.000630957	0.049369	0.116746
C	23	0.00501187	0.0449881	0.161734
G	10	0.1	-0.05	0.111734
T	31	0.000794328	0.0492057	0.16094
A	31	0.000794328	0.0492057	0.210146
C	20	0.01	0.04	0.250146
T	28	0.00158489	0.0484151	0.298561
G	29	0.00125893	0.0487411	0.347302
G	30	0.001	0.049	0.396302
G	10	0.1	-0.05	0.346302
T	31	0.000794328	0.0492057	0.395508
A	31	0.000794328	0.0492057	0.444713
C	20	0.01	0.04	0.484713
T	28	0.00158489	0.0484151	0.533128
G	32	0.000630957	0.049369	0.582497
G	31	0.000794328	0.0492057	0.631703
G	32	0.000630957	0.049369	0.681072
T	33	0.000501187	0.0494988	0.730571
A	29	0.00125893	0.0487411	0.779312
C	30	0.001	0.049	0.828312
T	31	0.000794328	0.0492057	0.877518
A	32	0.000630957	0.049369	0.926887
C	32	0.000630957	0.049369	0.976256
G	31	0.000794328	0.0492057	1.02546
T	32	0.000630957	0.049369	1.07483
A	33	0.000501187	0.0494988	1.12433
C	33	0.000501187	0.0494988	1.17383
T	32	0.000630957	0.049369	1.2232
G	33	0.000501187	0.0494988	1.2727
G	34	0.000398107	0.0496019	1.3223
G	30	0.001	0.049	1.3713
T	31	0.000794328	0.0492057	1.4205
A	32	0.000630957	0.049369	1.46987
T	33	0.000501187	0.0494988	1.51937
A	33	0.000501187	0.0494988	1.56887
C	32	0.000630957	0.049369	1.61824
T	33	0.000501187	0.0494988	1.66774
G	34	0.000398107	0.0496019	1.71734
G	23	0.00501187	0.0449881	1.76233		end valid region
G	7	0.199526	-0.149526	1.6128
T	7	0.199526	-0.149526	1.46328
A	12	0.0630957	-0.0130957	1.45018
3'
